# Supplementary material for: Brain region-specific and systemic transcriptomic alterations in a human alpha-synuclein overexpressing rat model
Source: Aging (Albany NY). 2025 Oct 20;17(10):2598–636. doi: 10.18632/aging.206331 (PMC12606970; doi:10.18632/aging.206331)
Supplement: Supplementary Table 1 [file aging-17-10-206331-s002.xlsx]

## Sheet: Table1
Supplementary Table 1. Overlapping differential genes between rat cerebellum (WT vs. BAC SNCA rat) and mouse cerebellum (WT vs. MSA mouse model) in young and old animals.
5- and 2-months old animals						12-months old animals
ensembl gene ID	rgd symbol	log2FoldChange_rat_WT-TG_5m	padj__rat_WT-TG_5m	log2FoldChange__MSA_mouse_WT-TG_2m	padj_MSA_mouse_WT-TG_2m	ensembl gene ID	rgd symbol	log2FoldChange_rat_WT-TG_12m	padj__rat_WT-TG_12m	log2FoldChange__MSA_mouse_WT-TG_12m	padj_MSA_mouse_WT-TG_12m
ENSRNOG00000004828	Acvr1c	0.527558	0.00489096	0.24586	0.00320024	ENSRNOG00000013720	Aebp1	-0.788037	3.2696e-08	0.207199	0.00315814
ENSRNOG00000017819	Cd14	-1.13861	8.0336e-06	0.461904	3.9467e-07	ENSRNOG00000017893	Baiap3	-0.746523	0.0180527	0.410394	6.03138e-15
ENSRNOG00000020151	Cdh1	-1.08838	0.00721352	-0.18116	0.0110596	ENSRNOG00000006930	Casq1	-0.709156	0.0125166	-0.281411	0.00902837
ENSRNOG00000021521	Chst5	-1.21273	2.5178e-10	-0.241878	0.0227642	ENSRNOG00000017819	Cd14	-0.917638	0.000376539	0.438691	8.9734e-06
ENSRNOG00000004281	Cobl	0.790702	0.00127101	0.201802	0.0364998	ENSRNOG00000021521	Chst5	-0.685164	0.00250455	-0.22666	0.0483019
ENSRNOG00000007657	Col27a1	1.63648	9.6047e-29	-0.59002	1.3661e-16	ENSRNOG00000000704	Cmklr1	-0.681045	0.00687843	0.236309	0.0179039
ENSRNOG00000001249	Col6a1	-0.640817	0.00453764	-0.174621	0.0223993	ENSRNOG00000011292	Col1a2	-0.514626	0.0359842	0.160463	0.0024495
ENSRNOG00000001469	Eln	-0.580331	0.0213952	0.229636	0.00639981	ENSRNOG00000007657	Col27a1	1.50212	4.20599e-24	-0.660022	1.46105e-37
ENSRNOG00000026050	Epb41l4a	-0.936802	3.9471e-12	0.862368	7.5189e-41	ENSRNOG00000001254	Col6a2	-0.884628	1.7056e-07	0.210157	0.0328423
ENSRNOG00000003183	Fmod	-1.20099	5.6048e-05	0.16335	0.00208204	ENSRNOG00000019615	Colq	-0.757315	0.0270816	0.251926	0.0114444
ENSRNOG00000071105	Gpc5	0.628756	0.0273256	0.255204	0.00143958	ENSRNOG00000004900	Crhr1	-0.522584	0.00402355	0.235753	2.49204e-07
ENSRNOG00000017528	Gpr157	0.896366	8.7991e-06	-0.419987	6.091e-10	ENSRNOG00000026050	Epb41l4a	-0.704728	1.02539e-06	0.653096	1.3466e-23
ENSRNOG00000016429	Grm5	0.963978	1.0782e-05	0.220086	0.042314	ENSRNOG00000033912	Fcho1	-0.561977	8.14837e-06	-0.0989697	0.0375683
ENSRNOG00000018268	Hhip	0.734654	0.00306207	0.233528	0.00336274	ENSRNOG00000017879	Gab1	0.541792	3.64226e-15	0.171718	0.0123139
ENSRNOG00000019050	Ifit1	3.55997	0.00061242	0.300784	0.00262454	ENSRNOG00000063213	Gjb1	0.678257	3.54156e-08	-0.218986	0.000674455
ENSRNOG00000025151	Ildr2	0.852377	0.00024282	0.158131	0.0444176	ENSRNOG00000017528	Gpr157	1.13312	5.24139e-10	-0.485477	1.86556e-16
ENSRNOG00000008210	Ky	-0.520522	0.00970313	0.386421	6.59e-07	ENSRNOG00000007779	Kank4	0.522758	0.0219628	0.125063	0.0414071
ENSRNOG00000005457	Lamp5	-0.503597	0.00280019	0.174987	0.0446181	ENSRNOG00000031927	Klk6	0.507143	0.0003284	-0.339192	0.00101283
ENSRNOG00000005093	Lgr6	1.91538	0.00052599	-0.285842	0.00065804	ENSRNOG00000010645	Lgals3	-1.15332	0.00021719	0.249719	0.0211682
ENSRNOG00000011271	Mcc	0.504336	0.0043764	-1.18658	3.532e-235	ENSRNOG00000011271	Mcc	0.595674	0.000227051	-1.17322	4.02417e-112
ENSRNOG00000063244	Mpeg1	-1.46584	0.00094711	0.186226	0.00537358	ENSRNOG00000052386	Nlrx1	0.524611	0.000300754	-0.204823	0.0106478
ENSRNOG00000010834	Mpped1	-0.62576	0.00177663	0.213565	0.0173155	ENSRNOG00000028658	Olig2	0.52125	0.0103975	0.250933	9.76737e-07
ENSRNOG00000032827	Mroh5	-0.872217	0.0249854	-0.627012	3.6891e-13	ENSRNOG00000014866	Pign	0.605202	2.10368e-05	-0.441795	1.45855e-15
ENSRNOG00000013172	Nr1h3	-0.579704	3.6446e-05	-0.230986	7.3956e-05	ENSRNOG00000016434	Prkd2	0.791944	0.0001499	0.199162	0.0154026
ENSRNOG00000028814	Oasl2	1.04274	0.0080597	0.275028	0.00668377	ENSRNOG00000047605	Ptprk	0.55454	0.0105597	-0.201171	0.000404011
ENSRNOG00000063828	Pcdh7	0.567175	0.00248153	0.151884	0.0361137	ENSRNOG00000002345	Rasgef1b	0.626431	0.0174278	0.230618	0.000443329
ENSRNOG00000014866	Pign	1.04679	1.1639e-11	-0.420793	9.0662e-13	ENSRNOG00000006645	Ryr3	-0.571059	0.0168608	-0.228016	0.00134489
ENSRNOG00000001374	Rasal1	-0.58847	0.020396	-0.160143	0.0242228	ENSRNOG00000016877	Shisa7	-0.508572	0.0225284	-0.129783	0.0169674
ENSRNOG00000005957	Slc4a7	0.61204	0.00026284	-0.130095	0.0282875	ENSRNOG00000008656	Snca	-0.746112	0.000212962	0.540899	1.18946e-15
ENSRNOG00000018822	Slc5a5	-1.52413	1.8037e-05	-0.203059	0.0127179	ENSRNOG00000007033	Sorcs2	0.711495	9.09423e-17	0.264393	1.69107e-07
ENSRNOG00000008554	Slc9a9	0.561257	4.1022e-05	-0.175099	0.0383638	ENSRNOG00000001837	Sst	-0.699723	0.00373456	0.247611	0.0028972
ENSRNOG00000058006	Sncg	4.01918	2.9638e-50	0.315924	0.00128132	ENSRNOG00000010529	Thbs2	1.04011	3.26084e-05	0.174952	0.0157838
ENSRNOG00000007033	Sorcs2	0.81533	1.1633e-20	0.157757	0.0335754	ENSRNOG00000010941	Tifa	0.711613	2.32004e-05	-0.188794	0.0261697
ENSRNOG00000013707	Spata13	0.539322	0.00187529	-0.320024	1.1308e-07	ENSRNOG00000018122	Tspan17	0.564383	2.35982e-06	-0.120101	0.0182048
ENSRNOG00000001141	Srrm4	0.530862	0.0133219	-0.146343	0.0173036
ENSRNOG00000020468	Stard4	0.529724	4.1672e-05	-0.279491	1.9939e-07
ENSRNOG00000028085	Tmem255a	0.540098	4.118e-06	0.151146	0.00033925
ENSRNOG00000052519	Ttc30a1	0.737081	0.00032855	0.195259	0.0432193
ENSRNOG00000002343	Uchl1	-0.522815	7.5262e-10	0.157486	0.00017055
ENSRNOG00000009571	Wipf3	0.654855	0.00185215	-0.13646	0.00859999
ENSRNOG00000024114	Zdbf2	1.08578	0.0292582	0.197558	0.0172206
ENSRNOG00000054426	Zfp704	0.528542	0.00226703	-0.122226	0.0129256
