# Supplementary material for: Brain region-specific and systemic transcriptomic alterations in a human alpha-synuclein overexpressing rat model
Source: Aging (Albany NY). 2025 Oct 20;17(10):2598–636. doi: 10.18632/aging.206331 (PMC12606970; doi:10.18632/aging.206331)
Supplement: Supplementary Table 3 [file aging-17-10-206331-s004.xlsx]

## Sheet: Table3
Supplementary Table 3. Core set of 122 genes exhibiting similar transcriptomic alterations in SNCA overexpressing rats across brain regions.
ensembl gene ID	rgd_symbol	log2FoldChange_Striatum_WT-TG_12m	padj_Striatum_WT-TG_12m	log2FoldChange_Striatum_WT-TG_5m	padj_Striatum_WT-TG_5m	log2FoldChange_Cortex_WT-TG_12m	padj_Cortex_WT-TG_12m	log2FoldChange_Cortex_WT-TG_5m	padj_Cortex_WT-TG_5m	log2FoldChange_Cerebellum_WT-TG_12m	padj_Cerebellum_WT-TG_12m	log2FoldChange_Cerebellum_WT-TG_5m	padj_Cerebellum_WT-TG_5m
ENSG00000145335		12.4414	1.47522e-182	12.4257	2.62793e-55	13.0864	2.08821e-76	14.5007	6.53185e-47	12.7797	3.72788e-194	13.6092	1.22128e-127
ENSRNOG00000000279	Rtn4ip1	-1.04261	1.92076e-48	-1.04173	3.17763e-31	-0.850543	1.17163e-23	-0.999128	3.66864e-21	-1.07849	1.85166e-29	-1.07348	4.88872e-29
ENSRNOG00000000699	Selplg	0.628608	1.25092e-05	0.583993	0.000761708	0.650311	2.97094e-05	0.156028	0.502143	0.961741	2.36302e-12	0.653933	9.21494e-06
ENSRNOG00000000700	Tmem119	0.608682	0.0023605	0.611357	0.00677668	0.757096	2.61662e-09	0.244397	0.177046	0.933484	2.59545e-06	0.778398	0.000144992
ENSRNOG00000000704	Cmklr1	-1.0592	4.44878e-14	-1.24784	4.54195e-14	-0.779737	0.000195498	-0.919697	0.000136294	-0.681045	0.00687843	-1.01706	1.07816e-05
ENSRNOG00000001300	P2rx4	-1.09123	3.19106e-41	-1.14354	1.26152e-29	-0.949773	8.49825e-33	-0.897818	4.77023e-19	-1.10478	6.82241e-52	-1.19475	2.47729e-61
ENSRNOG00000001325	Il3ra	0.586683	0.0335647	0.433484	0.157529	0.736974	9.56947e-08	0.331358	0.121816	0.70713	0.000403653	0.42316	0.0528894
ENSRNOG00000001329	Gjc3	0.726907	4.09243e-14	0.824936	1.05655e-12	1.30035	4.54314e-56	1.19296	1.42461e-29	0.872255	1.85874e-27	0.77559	2.27333e-19
ENSRNOG00000001383	Slc8b1	-0.42741	0.0341334	-0.621639	0.00151075	-0.764395	1.50438e-10	-0.933945	1.07349e-10	-0.371634	0.0809257	-0.695664	4.13392e-05
ENSRNOG00000001427	Orai2	1.11417	1.14538e-50	0.969539	1.51036e-25	1.15695	6.61109e-67	1.15198	2.84574e-45	0.91459	2.68655e-32	0.736762	2.39708e-21
ENSRNOG00000002592	Rps6ka6	0.333466	0.127915	0.537039	0.0169664	0.394379	0.148291	0.593136	0.0392535	0.691347	9.32858e-06	0.672838	0.00032423
ENSRNOG00000002863	Cacna1e	0.387804	0.0645249	0.623049	0.00139034	0.146882	0.754561	0.515598	0.0142143	0.260214	0.0343149	0.714205	1.60643e-13
ENSRNOG00000003114	B4galt4	-0.398246	0.000838568	-0.512888	0.000208112	-0.233761	0.281674	-0.664273	2.15892e-05	-0.439632	0.014301	-0.840448	1.04776e-08
ENSRNOG00000004327	Ddc	0.682855	3.46738e-12	0.246066	0.0894113	0.799786	0.00504995	0.679371	0.0351771	0.800164	4.77653e-10	0.681626	2.57018e-07
ENSRNOG00000004828	Acvr1c	0.374071	0.321503	0.924964	0.00125107	0.26974	0.434622	0.688295	0.00889627	0.049493	0.89693	0.527558	0.00489096
ENSRNOG00000005111	Nutm1	0.512812	0.129445	0.711366	0.0323585	0.70662	0.0215568	0.564095	0.0945782	0.459699	0.0800167	0.552054	0.0137183
ENSRNOG00000005826	RGD1562420	-1.79716	2.4756e-05	-1.06169	0.0586636	-1.1623	0.136786	-1.44496	0.0377998	-1.78862	0.00274604	-0.68605	0.334833
ENSRNOG00000007034	Hipk2	0.411324	0.0549957	0.726639	0.00017239	0.143838	0.462566	0.50562	6.07122e-05	0.0888584	0.762829	0.59835	0.000129819
ENSRNOG00000007041	Abcg2	-0.329818	0.421597	-1.56849	3.14985e-10	-0.317891	0.534145	-1.3174	3.55602e-06	-0.491597	0.169786	-1.28262	4.95957e-07
ENSRNOG00000007564	Evc	-0.700583	9.90492e-07	-0.836745	3.15551e-07	-0.434215	0.0603975	-0.740841	0.000507279	-0.771986	1.28295e-11	-0.955311	1.96781e-18
ENSRNOG00000008533	Ago2	0.53493	0.00016422	0.882608	1.34215e-08	0.745475	1.45304e-07	0.645281	0.000786868	0.624891	0.002034	1.07434	1.81533e-08
ENSRNOG00000008766	Grin2b	0.317724	0.0481948	0.630389	2.49281e-05	0.090358	0.898783	0.650541	0.00417763	0.253685	0.507108	0.686469	0.0259487
ENSRNOG00000009522	Adra1a	0.363357	0.373897	0.660343	0.0248204	0.276307	0.0450286	1.18667	5.14111e-19	0.60207	0.0428854	0.856487	0.00164287
ENSRNOG00000009563	Krt2	-1.26819	0.0141819	-0.304763	0.691597	-1.13864	3.80896e-05	-0.732549	0.026517	-0.890862	0.000419058	-0.543537	0.0143712
ENSRNOG00000009582	Rpe65	0.980784	0.000232082	0.346477	0.396869	1.21649	0.00232142	0.934734	0.0491498	0.53327	0.0043613	0.148727	0.562102
ENSRNOG00000009694	Bmp4	0.945877	0.0436469	-2.52917	2.69171e-09	0.647586	0.0173669	-0.871226	0.00290629	0.684521	0.433564	-1.58166	0.0092746
ENSRNOG00000009734	Akr1b8	0.91681	7.22695e-13	0.598162	0.000566567	0.829776	0.00324953	0.941573	0.00225895	0.676675	2.87823e-10	0.401532	0.000812026
ENSRNOG00000010802	Ube3d	-0.503052	0.115624	-0.726345	0.0265152	-0.800259	0.00141377	-1.15248	5.6723e-05	-1.15428	3.60035e-06	-1.35156	1.64394e-08
ENSRNOG00000011040	Tomm70-ps1	0.72096	0.0801108	1.26153	0.000777943	0.780772	0.00413806	0.750393	0.015808	0.669211	0.000138997	0.812958	4.56712e-06
ENSRNOG00000011100	LOC120096281	1.56519	2.67094e-44	1.92902	4.82058e-42	1.72195	5.23064e-90	2.05744	3.08613e-78	1.66515	5.00634e-89	2.12724	1.47883e-135
ENSRNOG00000011936	Abhd14a	-0.737711	0.0200642	-0.878433	0.00786357	-0.609149	4.3738e-05	-0.852799	3.6058e-07	-0.406599	0.0407476	-0.836355	1.16729e-07
ENSRNOG00000012067	Fam111a	4.77705	1.29576e-31	5.51166	1.21415e-27	7.08453	5.5799e-38	6.97653	2.76547e-24	8.10494	7.48652e-12	8.19625	2.97438e-15
ENSRNOG00000012811	Spint1	-1.10418	1.86836e-12	-0.6622	0.00205599	-1.10302	7.64243e-08	-1.03169	5.85892e-05	-0.90543	0.00509428	-0.925635	0.00321867
ENSRNOG00000013279	LOC681458	0.84532	1.86981e-09	0.187741	0.469208	0.74561	0.000252001	0.0983969	0.785381	0.546619	0.0422072	0.068525	0.874491
ENSRNOG00000013388	Pgap1	0.301448	0.217853	0.840132	2.17904e-05	0.140145	0.634543	0.589544	0.000425483	0.353001	0.0253859	0.633508	2.3421e-05
ENSRNOG00000013720	Aebp1	-0.127963	0.702191	-1.10556	5.7542e-14	-0.0541269	0.95983	-1.42242	4.14874e-07	-0.788037	3.2696e-08	-1.11523	3.00596e-18
ENSRNOG00000014011	Dll4	0.899115	0.00291236	0.418443	0.313685	0.500872	0.214401	0.750175	0.0271116	0.780022	0.0043613	0.160729	0.671151
ENSRNOG00000014090	Retsat	0.946484	2.49886e-27	0.591701	2.58429e-07	0.652551	3.91726e-07	0.345657	0.0389396	0.996822	1.71379e-30	0.718459	3.78505e-16
ENSRNOG00000014550	Plcxd3	0.393685	0.187928	1.01206	8.18153e-05	0.0415674	0.957173	0.678611	0.00735303	-0.0919318	0.722398	0.596108	2.01686e-05
ENSRNOG00000014610	Anpep	-0.323508	0.290956	-0.564009	0.0139187	-0.334002	0.236166	-0.693629	0.0014736	-0.444724	0.131594	-0.510449	0.0420418
ENSRNOG00000014866	Pign	0.410295	0.085718	0.692036	0.00217538	0.305261	0.427373	0.689777	0.0137598	0.605202	2.10368e-05	1.04679	1.16393e-11
ENSRNOG00000015003	Pex11a	-0.910249	1.18469e-07	-0.0613712	0.865759	-0.75772	8.80762e-09	-0.178158	0.369541	-0.710798	2.97817e-05	-0.01726	0.957185
ENSRNOG00000016429	Grm5	-0.0326965	0.966644	0.541213	0.0157868	0.0914426	0.752522	0.573166	1.84845e-06	0.344497	0.207338	0.963978	1.07816e-05
ENSRNOG00000016434	Prkd2	0.811926	2.41499e-06	0.809383	8.00322e-05	0.695833	2.4142e-06	0.228388	0.285896	0.791944	0.0001499	0.832559	4.10218e-05
ENSRNOG00000016975	Pxmp4	0.194967	0.699003	0.542207	0.0481569	0.594194	0.000827478	0.389399	0.0725616	0.340137	0.220437	0.59532	0.00352329
ENSRNOG00000017286	Ephx2	2.36579	0.0192384	3.90306	8.18153e-05	3.13139	6.25427e-05	3.87224	1.0264e-05	2.70743	0.000262518	3.76311	1.81533e-08
ENSRNOG00000017412	AABR07001512.1	0.909608	0.00778021	1.30017	0.000638858	0.764204	0.0344002	1.59362	5.71241e-06	1.59588	3.82744e-16	1.6626	2.59622e-18
ENSRNOG00000017468	Trappc6a	0.72092	0.000128749	0.590027	0.00907239	0.711195	8.94677e-06	0.321037	0.131385	0.528098	0.0314741	0.611395	0.00365995
ENSRNOG00000017528	Gpr157	1.34498	9.32232e-13	1.33113	1.39168e-07	1.36991	9.01826e-06	1.42219	0.000537478	1.13312	5.24139e-10	0.896366	8.7991e-06
ENSRNOG00000017577	Bphl	0.739814	7.8549e-06	0.386041	0.104239	0.953186	1.53867e-10	0.696296	0.000230936	0.957062	8.14837e-06	0.864003	4.36428e-05
ENSRNOG00000017693	Slc2a5	-0.843588	7.64391e-08	-0.748159	0.000116232	-0.651974	7.75141e-05	-1.11297	7.39909e-10	-0.471323	0.060162	-0.889145	4.13392e-05
ENSRNOG00000017820	Nqo2	-1.44824	1.02358e-14	-1.73822	2.34545e-14	-1.63085	4.66983e-19	-1.07256	6.79724e-06	-1.57924	1.85572e-14	-1.21778	1.38621e-08
ENSRNOG00000018268	Hhip	0.418921	0.106757	0.69667	0.00256703	0.594528	0.0401764	0.470706	0.17129	0.401915	0.168257	0.734654	0.00306207
ENSRNOG00000018379	Zfp688	-0.754772	2.25023e-06	-0.685459	0.0006249	-0.73502	2.09547e-07	-0.778722	4.72594e-06	-0.693514	0.00019678	-0.728392	1.36656e-05
ENSRNOG00000018822	Slc5a5	-0.239114	0.496142	-0.743217	0.000255665	-0.0885888	0.94245	-1.22782	0.000253968	-0.674971	0.159371	-1.52413	1.80369e-05
ENSRNOG00000019118	Slc13a3	-0.390126	0.132196	-0.646388	0.004089	-0.292258	0.604831	-1.53577	4.64663e-08	-0.207518	0.375723	-0.78525	7.42997e-09
ENSRNOG00000020669	Ovol1	0.566182	0.0243082	0.420472	0.170646	0.492138	0.0462584	0.65973	0.00859914	0.646747	0.0120017	0.724367	0.00226146
ENSRNOG00000020702	Cyb561a3	0.243087	0.589038	0.550694	0.0456617	0.559917	0.00719568	0.792123	0.000257504	0.726796	0.0933453	0.805242	0.032609
ENSRNOG00000021000	Naaladl1	-1.18167	1.44563e-09	-1.25429	5.19525e-08	-1.02955	3.15296e-15	-0.951046	1.79776e-08	-0.648368	2.29171e-07	-0.646322	1.00855e-06
ENSRNOG00000021474	Siglec5	1.64873	8.32023e-13	1.59938	6.55265e-08	1.52606	3.70041e-12	1.24132	1.13858e-05	1.51679	3.55276e-05	0.957361	0.0268061
ENSRNOG00000021521	Chst5	-0.254388	0.578582	-0.579464	0.0286689	-0.0714372	0.939579	-0.577695	0.0320033	-0.685164	0.00250455	-1.21273	2.51781e-10
ENSRNOG00000022196	Bmpr2	0.454251	0.0105821	0.706239	0.000118366	0.338637	0.237825	0.718202	0.00122227	0.269033	0.030574	0.511922	2.22183e-06
ENSRNOG00000022490	LOC100361008	-1.2714	0.0112818	-0.685558	0.291238	-1.10416	0.00088881	-0.207105	0.679345	-0.947203	5.25261e-05	-0.348551	0.223862
ENSRNOG00000024114	Zdbf2	0.446834	0.12955	1.31511	2.06279e-07	0.0806041	0.960391	1.19863	0.0132095	0.000967275	0.998984	1.08578	0.0292582
ENSRNOG00000024201	Fer1l5	-0.664042	0.014052	-0.0639958	0.895845	-0.58339	0.0269681	-0.399109	0.187554	-0.819109	2.71867e-06	-0.155054	0.536208
ENSRNOG00000024411	Cbr4	0.201434	0.43021	0.557466	0.00159203	0.511588	7.1683e-06	0.729939	2.12763e-08	0.270832	0.198081	0.61127	4.99377e-05
ENSRNOG00000025384	Slc2a10	-0.371136	0.339914	-1.03326	0.000170554	-0.560794	0.16133	-1.45903	5.60069e-06	-0.497397	0.103663	-0.934791	5.89326e-05
ENSRNOG00000026336	Tmem255b	0.646613	0.00574418	0.124087	0.745488	0.665621	1.2994e-06	-0.0659421	0.782009	0.823869	0.00707019	0.301792	0.410507
ENSRNOG00000027006	LOC100911361	1.60455	4.01688e-50	1.81328	4.39032e-41	1.77122	3.11856e-107	1.85463	4.59342e-75	1.68371	6.08279e-85	1.96849	3.57295e-112
ENSRNOG00000027847	Nxpe2	-0.527119	0.297224	-0.90566	0.0260665	-0.80592	0.0113856	-0.583356	0.140876	-0.451282	0.229006	-0.698759	0.0387949
ENSRNOG00000029262	RGD1560017	1.00503	0.0801108	1.2888	0.0259303	1.02865	0.0145115	0.575669	0.247574	0.677504	0.220499	1.1169	0.0093847
ENSRNOG00000030449	Gsta4	0.634649	1.36642e-08	-0.00471855	0.987264	0.862375	1.73064e-10	0.355786	0.0557871	0.535027	0.00851753	0.248533	0.27435
ENSRNOG00000032609	AY172581.18	-0.689931	6.5865e-09	-1.1062	2.58985e-16	-1.02034	2.06838e-13	-1.01351	2.12807e-09	0.052964	0.817294	-0.684824	4.00307e-12
ENSRNOG00000033251	Slc25a52	1.11218	6.86895e-05	1.00737	0.00451808	0.750658	0.00261936	0.935582	0.000821955	0.923603	0.0196808	0.527566	0.219718
ENSRNOG00000033271	AABR07048271.1	-0.711105	0.00232979	-1.2171	6.68939e-07	-0.953387	0.00249529	-0.388406	0.371019	-0.726344	0.0126762	-0.785195	0.0112842
ENSRNOG00000034269	Ago3	0.28277	0.417503	0.715049	0.00396304	-0.0624209	0.923596	0.760037	0.000514225	0.127014	0.655356	0.755556	3.03319e-05
ENSRNOG00000036641	LOC689065	-0.465311	0.47357	-1.02939	0.0221575	-0.908598	0.005884	-1.47139	6.72109e-05	-1.12282	0.00681675	-0.00156465	0.998441
ENSRNOG00000039357	Niban3	-3.09442	1.03168e-38	-3.09292	3.11893e-29	-1.64464	0.00174356	-1.46045	0.0201808	-2.72138	4.03246e-06	-1.32657	0.0445898
ENSRNOG00000042547	AABR07001902.1	-4.4743	3.21815e-23	-5.52664	1.59477e-23	-4.57335	2.74573e-40	-5.40329	1.47093e-34	-4.63158	1.85166e-29	-5.1516	1.19261e-37
ENSRNOG00000043167	Itga9	0.676848	7.81998e-07	0.61536	0.00030307	0.108458	0.863041	0.505428	0.0307622	0.512507	0.0168378	0.510766	0.0233875
ENSRNOG00000046700	Mettl27	0.792982	1.40931e-09	0.682321	8.11195e-05	0.698916	1.0508e-09	0.258012	0.10985	0.994145	1.94291e-08	0.677472	0.000131748
ENSRNOG00000049849	Fam199x	0.210445	0.63745	0.761367	0.0053284	-0.0798118	0.885192	0.710787	0.00106315	0.163574	0.633875	0.652821	0.00412122
ENSRNOG00000051237	Marf1-ps1	-0.773138	0.00599342	0.141125	0.754818	-0.865791	7.18726e-05	0.152022	0.694809	-1.46318	2.52559e-08	-0.220387	0.612887
ENSRNOG00000052519	Ttc30a1	0.73239	0.000530915	0.960245	0.000229314	1.11186	2.06895e-06	1.36514	2.63361e-06	0.959599	1.46185e-06	0.737081	0.000328551
ENSRNOG00000052802	Aldoa	-1.09771	8.01888e-05	-0.886471	0.0088583	-0.699662	0.00132561	-1.27117	1.91132e-08	-1.07941	7.60205e-05	-0.774628	0.00587316
ENSRNOG00000054751	Lmbrd2	0.208151	0.656591	0.749043	0.00403302	0.128346	0.502534	0.59528	1.24085e-06	0.0665582	0.776585	0.587975	2.67091e-06
ENSRNOG00000055020	LOC679731	0.435132	0.0935528	0.659032	0.0110328	0.603618	0.00655055	0.636673	0.0158964	0.660695	0.000300754	0.984161	2.18142e-08
ENSRNOG00000055942	Rpl6-ps6	-0.528386	0.00102763	-0.347626	0.103178	-0.0895807	0.886891	-0.589041	0.00444627	-0.610967	0.0056599	-0.584067	0.00452655
ENSRNOG00000056036	Zfp51	-0.664046	0.000619999	-0.588567	0.0141487	-0.574308	0.016981	0.0712247	0.856872	-1.19152	6.40688e-11	-0.393969	0.089773
ENSRNOG00000058006	Sncg	2.75163	2.18475e-61	2.0098	1.04117e-21	2.50379	9.45856e-64	2.55033	5.24186e-45	3.74021	1.11848e-40	4.01918	2.96379e-50
ENSRNOG00000059083	LOC120100370	0.92583	3.67196e-05	0.713124	0.0116891	1.4592	1.07295e-05	1.15926	0.00368937	1.41882	4.4198e-05	1.51951	6.2323e-06
ENSRNOG00000060356	Kif15	-1.11607	0.000200569	-1.5403	2.42248e-06	-1.0945	0.00211708	-1.76444	9.37636e-06	-2.16527	2.42767e-13	-2.2543	3.86955e-14
ENSRNOG00000061379	C7	0.77306	1.25528e-06	0.977634	1.90792e-07	1.43605	2.30057e-09	1.21444	5.73087e-05	0.704275	0.00019678	0.0546551	0.866072
ENSRNOG00000063244	Mpeg1	-0.830204	0.292326	-1.92009	0.000957502	-1.04886	0.00740743	-1.61343	5.32834e-05	-0.874978	0.12448	-1.46584	0.000947108
ENSRNOG00000063542	LOC120093363	1.32201	0.148811	2.08688	0.010967	1.61848	0.000516418	1.6101	0.00879841	2.25603	0.00168799	1.96067	0.00580379
ENSRNOG00000063817		2.12377	1.41984e-14	1.45511	2.98146e-05	2.62302	2.72497e-28	3.07676	8.23661e-24	1.64723	1.21412e-05	1.53372	0.000259811
ENSRNOG00000063986		-1.93025	0.0112818	-1.42018	0.118565	-1.80675	7.29245e-09	-0.127602	0.833114	-2.06654	4.12565e-08	-1.11546	0.01053
ENSRNOG00000064284	LOC120100687	-1.36043	1.20509e-05	-1.16651	0.00220648	-1.73982	9.94849e-06	-1.19586	0.0151027	-1.72029	8.49623e-05	-1.19308	0.00950511
ENSRNOG00000064682		0.814128	0.228062	1.65028	0.00217538	0.870681	0.0206735	1.13858	0.00356389	0.933718	0.0188276	1.08151	0.00607468
ENSRNOG00000064815		0.244016	0.221569	0.518881	0.00314217	0.179943	0.44688	0.548366	0.0010164	0.20233	0.177465	0.650182	4.95957e-07
ENSRNOG00000065100		-0.241981	0.773878	-1.04548	0.0209165	-0.745969	0.180246	-1.54868	0.00374297	-0.82025	0.0227408	-1.37354	0.000122499
ENSRNOG00000065633		1.13038	0.00202931	0.911558	0.0468426	1.11143	0.0096089	0.824172	0.105336	1.08225	0.0164583	1.31286	0.00291546
ENSRNOG00000065696		0.882947	0.00273645	0.746975	0.0387122	0.43036	0.214232	1.06927	0.00280347	0.210745	0.545602	0.628448	0.0161249
ENSRNOG00000065945		1.28517	1.32415e-07	0.966255	0.00647057	1.14584	0.000269281	1.44627	0.000281561	1.0947	6.07386e-08	0.749942	0.000625222
ENSRNOG00000065954	LOC103690870	0.393164	0.396131	0.880228	0.0145619	0.110242	0.896901	0.90144	0.00191268	0.425757	0.0395962	0.702307	0.00111856
ENSRNOG00000066012		-0.734811	0.0121394	-0.494976	0.16016	-0.798529	0.00716176	-1.19462	0.000736776	-0.50304	0.0317052	-0.230609	0.424715
ENSRNOG00000066174		-0.841673	0.0146054	-0.509547	0.245285	-0.849405	0.00361401	-0.894497	0.0155379	-0.70741	0.0155085	-0.553695	0.0703663
ENSRNOG00000066293		-1.05812	2.26698e-18	-1.07374	1.55834e-13	-1.07217	1.15632e-11	-0.786987	0.000125882	-0.487554	0.0595319	-0.511298	0.0337439
ENSRNOG00000066565	Srek1ip1-ps1	-0.508656	0.00505303	-0.597088	0.00398122	-0.540201	7.75141e-05	-0.221118	0.26442	-0.69116	8.94533e-07	-0.494614	0.00115601
ENSRNOG00000067218		-1.15102	1.42373e-06	-1.69604	1.34908e-09	-0.968799	0.00145114	-1.36268	0.000306788	-0.928516	4.28004e-07	-1.01723	2.75099e-07
ENSRNOG00000067362		0.215817	0.63469	0.598626	0.0499887	0.00988869	0.990658	0.667248	0.0172812	0.120364	0.646942	0.582491	0.0016539
ENSRNOG00000067425		-0.901337	0.00751187	-1.53613	3.97849e-05	-0.421946	0.574864	-1.0417	0.027582	-0.554399	0.160131	-1.34511	1.49989e-05
ENSRNOG00000067691		0.708614	1.63721e-05	-0.000720847	0.998867	0.91299	7.84641e-06	0.341761	0.217109	0.479282	0.148627	0.556067	0.0452943
ENSRNOG00000068328	LOC120101245	0.930666	3.45189e-05	0.714887	0.0116791	1.45558	1.24041e-05	1.15933	0.00383165	1.41884	4.60323e-05	1.52204	6.2323e-06
ENSRNOG00000069481	Abcg3l1	-0.418902	0.212844	-0.78869	0.00433016	-0.46298	0.0521952	-0.598277	0.0129772	-0.447044	0.168319	-0.74497	0.00498366
ENSRNOG00000069592	LOC120095179	-0.98918	7.17175e-06	-0.607958	0.038038	-0.51651	0.000798038	-0.598792	0.000541931	-0.70611	0.0372754	-0.930568	0.00182399
ENSRNOG00000069950		-1.61865	2.24034e-16	-1.17372	6.77813e-06	-1.92332	0.011479	-1.29065	0.139267	-0.950162	0.0169614	-0.774055	0.0465423
ENSRNOG00000070022	LOC103690230	-0.401181	0.0707862	0.736714	0.0006249	-0.672009	0.000412141	0.637118	0.00567294	-0.815256	0.00400463	-0.327337	0.368302
ENSRNOG00000070224	LOC120101246	0.927817	3.67196e-05	0.716501	0.011411	1.4592	1.07295e-05	1.15926	0.00368937	1.42157	4.31055e-05	1.51922	6.2323e-06
ENSRNOG00000070708	LOC120103273	0.926193	3.93077e-05	0.718607	0.011299	1.45522	1.07295e-05	1.15914	0.00360737	1.41732	5.28445e-05	1.50613	9.16538e-06
ENSRNOG00000070944		0.0329084	0.970859	0.650443	0.016367	-0.106404	0.815639	0.689397	0.00128067	-0.00941973	0.969667	0.578756	1.84e-05
ENSRNOG00000070948		0.398297	0.174656	0.969647	0.00046196	0.846061	0.00863072	1.24669	0.000322987	0.744291	0.225293	1.30808	0.00577502
