# Supplementary material for: Brain region-specific and systemic transcriptomic alterations in a human alpha-synuclein overexpressing rat model
Source: Aging (Albany NY). 2025 Oct 20;17(10):2598–636. doi: 10.18632/aging.206331 (PMC12606970; doi:10.18632/aging.206331)
Supplement: Supplementary Table 4 [file aging-17-10-206331-s005.xlsx]

## Sheet: age_WT
Supplementary Table 4. Striatal differential gene expression analysis results for each comparison.
ensembl_geneID	baseMean	log2FoldChange	lfcSE	stat	pvalue	padj	ensembl	rgd_symbol	description
ENSRNOG00000070901	2225	-0.0270799	0.0526522	-0.514317	0.60703	0.713917	ENSRNOG00000070901	Irgq	immunity-related GTPase Q [Source:RGD Symbol;Acc:1309409]
ENSRNOG00000018029	89.8121	0.0209492	0.241232	0.0868428	0.930796	0.953963	ENSRNOG00000018029	Doc2g	double C2-like domains, gamma [Source:RGD Symbol;Acc:1307473]
ENSRNOG00000032625	251.525	0.037876	0.108093	0.350402	0.726037	0.811364	ENSRNOG00000032625	Zfp108	zinc finger protein 108 [Source:RGD Symbol;Acc:1564214]
ENSRNOG00000029315	59.9171	0.411521	0.230612	1.78448	0.0743461	0.140728	ENSRNOG00000029315	LOC690251	similar to SUMO/sentrin specific protease 5 [Source:RGD Symbol;Acc:1582860]
ENSRNOG00000016356	10576.2	0.485982	0.0536789	9.05351	1.38445e-19	1.69735e-17	ENSRNOG00000016356	Got1	glutamic-oxaloacetic transaminase 1 [Source:RGD Symbol;Acc:2721]
ENSRNOG00000015810	21.0353	-0.269478	0.310075	-0.869072	0.384808	0.511981	ENSRNOG00000015810	Trip13	thyroid hormone receptor interactor 13 [Source:RGD Symbol;Acc:1308516]
ENSRNOG00000017538	44.1372	0.133175	0.255233	0.52178	0.601824	0.709133	ENSRNOG00000017538	Lrrc27	leucine rich repeat containing 27 [Source:RGD Symbol;Acc:1559981]
ENSRNOG00000027204	1163.61	-0.160432	0.0817472	-1.96253	0.0497003	0.101193	ENSRNOG00000027204	Map6	microtubule-associated protein 6 [Source:RGD Symbol;Acc:61804]
ENSRNOG00000070886	849.477	0.426494	0.0664401	6.41923	1.36969e-10	2.71901e-09	ENSRNOG00000070886
ENSRNOG00000014903	1400.14	-0.000250002	0.0559788	-0.00446602	0.996437	0.997638	ENSRNOG00000014903	Zfyve27	zinc finger FYVE-type containing 27 [Source:RGD Symbol;Acc:735177]
ENSRNOG00000021051	1204.59	-0.0372817	0.0643458	-0.579395	0.562322	0.676558	ENSRNOG00000021051	Cyth2	cytohesin 2 [Source:RGD Symbol;Acc:620398]
ENSRNOG00000011160	2380.99	0.387539	0.0808229	4.79492	1.62737e-06	1.30016e-05	ENSRNOG00000011160	Sv2b	synaptic vesicle glycoprotein 2b [Source:RGD Symbol;Acc:619716]
ENSRNOG00000017748	262.252	-0.685151	0.200222	-3.42196	0.000621711	0.00247032	ENSRNOG00000017748	Nkx6-2	NK6 homeobox 2 [Source:RGD Symbol;Acc:1307280]
ENSRNOG00000016227	1815.16	0.100567	0.0655799	1.5335	0.125152	0.213852	ENSRNOG00000016227	Glrx3	glutaredoxin 3 [Source:RGD Symbol;Acc:69414]
ENSRNOG00000016906	70.0999	0.339294	0.195195	1.73824	0.0821689	0.152465	ENSRNOG00000016906	Lipt2	lipoyl(octanoyl) transferase 2 [Source:RGD Symbol;Acc:1305211]
ENSRNOG00000027582	1264.67	-0.267372	0.134774	-1.98386	0.0472713	0.097102	ENSRNOG00000027582	Dpysl4	dihydropyrimidinase-like 4 [Source:RGD Symbol;Acc:2409]
ENSRNOG00000009830	417.24	0.387418	0.117533	3.29626	0.000979818	0.00366742	ENSRNOG00000009830	Fam204a	family with sequence similarity 204, member A [Source:RGD Symbol;Acc:1305500]
ENSRNOG00000013767	119.612	-0.452128	0.175182	-2.5809	0.00985434	0.0263653	ENSRNOG00000013767	Ccdc61	coiled-coil domain containing 61 [Source:RGD Symbol;Acc:1307390]
ENSRNOG00000067619	24.1407	0.45141	0.340976	1.32388	0.185545	0.292535	ENSRNOG00000067619
ENSRNOG00000032699	23696.8	-0.393033	0.0669568	-5.86995	4.35932e-09	6.36358e-08	ENSRNOG00000032699	Ttyh1	tweety family member 1 [Source:RGD Symbol;Acc:1310103]
ENSRNOG00000018408	481.745	-0.0639794	0.0907695	-0.704856	0.4809	0.605197	ENSRNOG00000018408	RGD1307554	similar to CG16812-PA [Source:RGD Symbol;Acc:1307554]
ENSRNOG00000018334	154.373	-0.119121	0.123719	-0.962838	0.335629	0.463505	ENSRNOG00000018334	Ctu1	cytosolic thiouridylase subunit 1 [Source:RGD Symbol;Acc:1308740]
ENSRNOG00000067907	848.975	0.180759	0.0881534	2.0505	0.0403157	0.0853113	ENSRNOG00000067907
ENSRNOG00000023407	368.661	0.00331029	0.101862	0.0324977	0.974075	0.984215	ENSRNOG00000023407	Mrpl36	mitochondrial ribosomal protein L36 [Source:RGD Symbol;Acc:1306375]
ENSRNOG00000010529	58.6836	0.0432593	0.303268	0.142644	0.886571	0.925323	ENSRNOG00000010529	Thbs2	thrombospondin 2 [Source:RGD Symbol;Acc:1310979]
ENSRNOG00000012684	883.453	-0.0367903	0.0667563	-0.551114	0.581556	0.692499	ENSRNOG00000012684	Bloc1s2	biogenesis of lysosomal organelles complex-1, subunit 2 [Source:RGD Symbol;Acc:1306551]
ENSRNOG00000014258	142.072	0.570951	0.172286	3.31397	0.000919825	0.00347123	ENSRNOG00000014258	Rab32	RAB32, member RAS oncogene family [Source:RGD Symbol;Acc:1559997]
ENSRNOG00000010918	178.826	0.184878	0.135718	1.36222	0.173129	0.277021	ENSRNOG00000010918	Cebpa	CCAAT/enhancer binding protein alpha [Source:RGD Symbol;Acc:2326]
ENSRNOG00000067027	76.176	0.372336	0.239621	1.55385	0.12022	0.207751	ENSRNOG00000067027	LOC108349691	histone H3.3-like [Source:RGD Symbol;Acc:11381356]
ENSRNOG00000019416	924.055	-0.299108	0.095594	-3.12894	0.00175437	0.00608876	ENSRNOG00000019416	Zfp61	zinc finger protein 94 [Source:RGD Symbol;Acc:1560430]
ENSRNOG00000014946	1366.73	0.134798	0.0644433	2.09173	0.0364627	0.078548	ENSRNOG00000014946	Thumpd1	THUMP domain containing 1 [Source:RGD Symbol;Acc:1308854]
ENSRNOG00000020318	372.537	-0.2182	0.0913807	-2.38781	0.016949	0.0416153	ENSRNOG00000020318	Pnkp	polynucleotide kinase 3'-phosphatase [Source:RGD Symbol;Acc:1303331]
ENSRNOG00000047406	111.874	-0.0807869	0.154742	-0.522074	0.601619	0.709003	ENSRNOG00000047406	Cfap90	cilia and flagella associated protein 90 [Source:RGD Symbol;Acc:1308544]
ENSRNOG00000050445	3940.16	0.0639131	0.0628966	1.01616	0.309552	0.436774	ENSRNOG00000050445	Gde1	glycerophosphodiester phosphodiesterase 1 [Source:RGD Symbol;Acc:621788]
ENSRNOG00000013945	274.674	0.00118414	0.101105	0.0117119	0.990655	0.994381	ENSRNOG00000013945	Itpkc	inositol-trisphosphate 3-kinase C [Source:RGD Symbol;Acc:631336]
ENSRNOG00000031947	66.6947	0.125438	0.20744	0.604693	0.545383	0.662957	ENSRNOG00000031947	LOC100361060	ribosomal protein L36-like [Source:RGD Symbol;Acc:2320900]
ENSRNOG00000016565	164.094	-0.501451	0.127621	-3.92921	8.52265e-05	0.000431268	ENSRNOG00000016565	Zfp524	zinc finger protein 524 [Source:RGD Symbol;Acc:1565485]
ENSRNOG00000019138	70.6876	-0.0284062	0.190661	-0.148988	0.881563	0.921785	ENSRNOG00000019138	Clec11a	C-type lectin domain containing 11A [Source:RGD Symbol;Acc:3627]
ENSRNOG00000065649	255.421	0.127921	0.112108	1.14105	0.253847	0.374101	ENSRNOG00000065649	Zfp94	zinc finger protein 94 [Source:RGD Symbol;Acc:1560430]
ENSRNOG00000016574	520.957	-0.234319	0.0766066	-3.05873	0.00222276	0.0074648	ENSRNOG00000016574	Fiz1	FLT3-interacting zinc finger 1 [Source:RGD Symbol;Acc:1306359]
ENSRNOG00000055971	74.0883	0.125737	0.181064	0.694435	0.48741	0.611225	ENSRNOG00000055971	AABR07000544.1
ENSRNOG00000055608	915.33	-0.015782	0.0638209	-0.247285	0.804688	0.86798	ENSRNOG00000055608	LOC102548695	zinc finger protein 45-like [Source:RGD Symbol;Acc:7529325]
ENSRNOG00000013641	54.3677	-0.420573	0.227929	-1.8452	0.0650092	0.126035	ENSRNOG00000013641	Myo7a	myosin VIIA [Source:RGD Symbol;Acc:628830]
ENSRNOG00000020347	1368.39	0.0867392	0.0616489	1.40699	0.159431	0.259719	ENSRNOG00000020347	Nup98	nucleoporin 98 and 96 precursor [Source:RGD Symbol;Acc:71033]
ENSRNOG00000065259	21.7304	0.357688	0.338609	1.05635	0.29081	0.415984	ENSRNOG00000065259
ENSRNOG00000016608	201.608	-0.514245	0.138137	-3.72271	0.000197099	0.000906257	ENSRNOG00000016608	Zfp579	zinc finger protein 579 [Source:RGD Symbol;Acc:1308475]
ENSRNOG00000012730	245.645	-0.677382	0.109749	-6.17212	6.73783e-10	1.16571e-08	ENSRNOG00000012730	Lrrk1	leucine-rich repeat kinase 1 [Source:RGD Symbol;Acc:1308000]
ENSRNOG00000018117	3319.64	-0.203136	0.0697745	-2.91132	0.00359905	0.0112495	ENSRNOG00000018117	Ndufv1	NADH:ubiquinone oxidoreductase core subunit V1 [Source:RGD Symbol;Acc:1359247]
ENSRNOG00000016362	143.356	-1.08486	0.195875	-5.53855	3.0499e-08	3.64137e-07	ENSRNOG00000016362	Gpr4	G protein-coupled receptor 4 [Source:RGD Symbol;Acc:1311604]
ENSRNOG00000017307	190.381	0.0847626	0.130077	0.651632	0.514639	0.635088	ENSRNOG00000017307	Prss23	serine protease 23 [Source:RGD Symbol;Acc:1359545]
ENSRNOG00000020942	54.1091	-0.567817	0.210676	-2.69521	0.00703446	0.0198361	ENSRNOG00000020942	Plekha4	pleckstrin homology domain containing A4 [Source:RGD Symbol;Acc:735133]
ENSRNOG00000017079	1800.42	0.543213	0.0851229	6.38152	1.75342e-10	3.40835e-09	ENSRNOG00000017079	Pgm2l1	phosphoglucomutase 2-like 1 [Source:RGD Symbol;Acc:1583226]
ENSRNOG00000017795	910.766	-0.258069	0.120256	-2.14601	0.0318725	0.0703322	ENSRNOG00000017795	Hspbp1	HSPA (Hsp70) binding protein 1 [Source:RGD Symbol;Acc:628677]
ENSRNOG00000052607	26.2767	0.00872249	0.295638	0.029504	0.976463	0.985801	ENSRNOG00000052607	Snora12	small nucleolar RNA, H/ACA box 12 [Source:RGD Symbol;Acc:41366654]
ENSRNOG00000052319	239.219	0.307445	0.132259	2.32456	0.0200953	0.047977	ENSRNOG00000052319	AABR07004881.1
ENSRNOG00000027542	321.917	-0.0320016	0.109318	-0.29274	0.769721	0.842668	ENSRNOG00000027542	LOC100302465	hypothetical LOC100302465 [Source:RGD Symbol;Acc:2311471]
ENSRNOG00000065457	206.712	0.385161	0.18089	2.12926	0.033233	0.0727437	ENSRNOG00000065457
ENSRNOG00000021478	1592.26	0.0781962	0.073346	1.06613	0.286366	0.41102	ENSRNOG00000021478	Tpd52l1	TPD52 like 1 [Source:RGD Symbol;Acc:1594796]
ENSRNOG00000018090	2714.94	-0.248412	0.0792594	-3.13416	0.00172348	0.00599547	ENSRNOG00000018090	Ppp6r1	protein phosphatase 6, regulatory subunit 1 [Source:RGD Symbol;Acc:1311409]
ENSRNOG00000069157	160.035	0.113615	0.117907	0.963595	0.335249	0.463292	ENSRNOG00000069157	Chchd4	coiled-coil-helix-coiled-coil-helix domain containing 4 [Source:RGD Symbol;Acc:1310746]
ENSRNOG00000070519	27.6822	1.88612	0.375506	5.02288	5.0902e-07	4.60304e-06	ENSRNOG00000070519
ENSRNOG00000015230	530.841	-0.122256	0.114774	-1.06519	0.286791	0.411455	ENSRNOG00000015230	Ermard	ER membrane-associated RNA degradation [Source:RGD Symbol;Acc:1309374]
ENSRNOG00000017069	956.616	-0.343659	0.0733005	-4.68836	2.75402e-06	2.07182e-05	ENSRNOG00000017069	Mark4	microtubule affinity regulating kinase 4 [Source:RGD Symbol;Acc:1591792]
ENSRNOG00000021013	313.189	0.202615	0.103513	1.95739	0.0503021	0.102149	ENSRNOG00000021013	Stx3	syntaxin 3 [Source:RGD Symbol;Acc:621005]
ENSRNOG00000018677	1244.5	-0.474502	0.0809642	-5.86063	4.61112e-09	6.67251e-08	ENSRNOG00000018677	Akt2	AKT serine/threonine kinase 2 [Source:RGD Symbol;Acc:2082]
ENSRNOG00000019207	2407.77	-0.722203	0.117803	-6.13059	8.75554e-10	1.47718e-08	ENSRNOG00000019207	Shank1	SH3 and multiple ankyrin repeat domains 1 [Source:RGD Symbol;Acc:621011]
ENSRNOG00000070234	236.938	0.450171	0.121448	3.7067	0.000209978	0.000957813	ENSRNOG00000070234	Zfp141	zinc finger protein 141 [Source:RGD Symbol;Acc:1597345]
ENSRNOG00000063629	165.057	0.478884	0.125336	3.8208	0.000133018	0.000640165	ENSRNOG00000063629
ENSRNOG00000016714	56.1893	-0.619414	0.223921	-2.76622	0.005671	0.0165437	ENSRNOG00000016714	Nrap	nebulin-related anchoring protein [Source:RGD Symbol;Acc:1306731]
ENSRNOG00000015734	744.157	0.624106	0.0972009	6.42079	1.35573e-10	2.69488e-09	ENSRNOG00000015734	Ube3a	ubiquitin protein ligase E3A [Source:RGD Symbol;Acc:1306361]
ENSRNOG00000068800	399.754	0.426553	0.107854	3.9549	7.6567e-05	0.000394119	ENSRNOG00000068800
ENSRNOG00000069276	219.32	0.0765301	0.111483	0.686473	0.492415	0.615437	ENSRNOG00000069276	LOC102548320	zinc finger protein 845-like [Source:RGD Symbol;Acc:7683572]
ENSRNOG00000049772	166.273	-0.0391528	0.141556	-0.27659	0.782095	0.851476	ENSRNOG00000049772	Gemin7	gem (nuclear organelle) associated protein 7 [Source:RGD Symbol;Acc:1597035]
ENSRNOG00000053859	873.286	0.588958	0.0916753	6.42439	1.32399e-10	2.64586e-09	ENSRNOG00000053859	Ranbp6	RAN binding protein 6 [Source:RGD Symbol;Acc:1305165]
ENSRNOG00000066647	35.5274	-0.821272	0.335975	-2.44444	0.0145077	0.0365948	ENSRNOG00000066647
ENSRNOG00000066887	45.3784	0.578054	0.255078	2.26619	0.0234399	0.0545677	ENSRNOG00000066887	LOC102556805	rho GTPase-activating protein 20-like [Source:RGD Symbol;Acc:7734973]
ENSRNOG00000018915	39.7316	0.123306	0.353449	0.348865	0.727191	0.812107	ENSRNOG00000018915	Tagap	T-cell activation RhoGTPase activating protein [Source:RGD Symbol;Acc:1308618]
ENSRNOG00000020358	2421.72	-0.336811	0.194506	-1.73163	0.0833401	0.154141	ENSRNOG00000020358	Ptov1	PTOV1, extended AT-hook containing adaptor protein [Source:RGD Symbol;Acc:1306977]
ENSRNOG00000064667	23.8184	-0.840242	0.338689	-2.48087	0.0131063	0.0336447	ENSRNOG00000064667	Tmem86b	transmembrane protein 86B [Source:RGD Symbol;Acc:1593455]
ENSRNOG00000053502	3740.56	-0.219773	0.0896366	-2.45182	0.0142137	0.0359556	ENSRNOG00000053502	Arhgef17	Rho guanine nucleotide exchange factor 17 [Source:RGD Symbol;Acc:1309890]
ENSRNOG00000021442	200.68	-0.0703986	0.129648	-0.542997	0.587132	0.697125	ENSRNOG00000021442	Hddc2	HD domain containing 2 [Source:RGD Symbol;Acc:1307562]
ENSRNOG00000066023	311.951	0.234777	0.0930533	2.52304	0.0116347	0.0304047	ENSRNOG00000066023
ENSRNOG00000014278	731.292	-0.293672	0.0913593	-3.21447	0.00130684	0.00470715	ENSRNOG00000014278	Zfp710	zinc finger protein 710 [Source:RGD Symbol;Acc:1306491]
ENSRNOG00000022921	751.049	-0.256659	0.108019	-2.37605	0.017499	0.0426921	ENSRNOG00000022921	Dact2	dishevelled-binding antagonist of beta-catenin 2 [Source:RGD Symbol;Acc:1310742]
ENSRNOG00000037360	32.5337	-0.0310093	0.289907	-0.106963	0.914818	0.942942	ENSRNOG00000037360	AABR07003173.1
ENSRNOG00000020624	1891.3	0.199095	0.0605779	3.28659	0.00101409	0.00377737	ENSRNOG00000020624	Acadsb	acyl-CoA dehydrogenase, short/branched chain [Source:RGD Symbol;Acc:2013]
ENSRNOG00000013981	16499	-0.0570292	0.070056	-0.814053	0.415615	0.541923	ENSRNOG00000013981	Ptpn5	protein tyrosine phosphatase, non-receptor type 5 [Source:RGD Symbol;Acc:3448]
ENSRNOG00000065346	37.9108	0.445793	0.286511	1.55594	0.119723	0.20718	ENSRNOG00000065346
ENSRNOG00000059083	215.874	-0.175435	0.202388	-0.866823	0.386039	0.513364	ENSRNOG00000059083	LOC120100370	small nucleolar RNA SNORA44 [Source:RGD Symbol;Acc:41111402]
ENSRNOG00000030818	686.902	0.255605	0.071549	3.57244	0.000353664	0.00150614	ENSRNOG00000030818	C1h11orf42	similar to human chromosome 11 open reading frame 42 [Source:RGD Symbol;Acc:1561034]
ENSRNOG00000064515	1237.46	0.318069	0.0686224	4.63506	3.56836e-06	2.59814e-05	ENSRNOG00000064515
ENSRNOG00000017930	711.761	-0.116961	0.0704272	-1.66074	0.0967656	0.174083	ENSRNOG00000017930	Lpcat1	lysophosphatidylcholine acyltransferase 1 [Source:RGD Symbol;Acc:1311599]
ENSRNOG00000063371	225.088	-0.163764	0.101526	-1.61302	0.106739	0.189157	ENSRNOG00000063371
ENSRNOG00000068809	221.355	0.218484	0.113235	1.92947	0.053672	0.107589	ENSRNOG00000068809
ENSRNOG00000019869	212.279	-0.112367	0.156562	-0.717717	0.472932	0.597379	ENSRNOG00000019869	Lrfn1	leucine rich repeat and fibronectin type III domain containing 1 [Source:RGD Symbol;Acc:1304707]
ENSRNOG00000067318	238.391	-0.234517	0.118183	-1.98436	0.0472157	0.0970144	ENSRNOG00000067318
ENSRNOG00000023411	232.868	-0.168271	0.127354	-1.32129	0.186406	0.293522	ENSRNOG00000023411	Vsig10l	V-set and immunoglobulin domain containing 10 like [Source:RGD Symbol;Acc:1564982]
ENSRNOG00000046005	122939	-0.302448	0.0708742	-4.2674	1.97767e-05	0.000119058	ENSRNOG00000046005	Scd2	stearoyl-Coenzyme A desaturase 2 [Source:RGD Symbol;Acc:621177]
ENSRNOG00000018686	2745.52	-0.332534	0.114079	-2.91495	0.00355742	0.0111341	ENSRNOG00000018686	Atxn2l	ataxin 2-like [Source:RGD Symbol;Acc:1565868]
ENSRNOG00000063261	231.484	0.147891	0.118505	1.24797	0.212042	0.324689	ENSRNOG00000063261
ENSRNOG00000058906	28.277	-0.62082	0.318364	-1.95004	0.0511719	0.103423	ENSRNOG00000058906	Ptprh	protein tyrosine phosphatase, receptor type, H [Source:RGD Symbol;Acc:620553]
ENSRNOG00000069563	30.9512	0.202967	0.28315	0.716817	0.473487	0.597979	ENSRNOG00000069563
ENSRNOG00000017408	621.678	-0.214817	0.0851671	-2.5223	0.0116589	0.0304627	ENSRNOG00000017408	Fhip1b	FHF complex subunit HOOK interacting protein 1B [Source:RGD Symbol;Acc:1359585]
ENSRNOG00000021794	183.085	-0.194667	0.14966	-1.30072	0.193353	0.302579	ENSRNOG00000021794	Znhit2	zinc finger, HIT-type containing 2 [Source:RGD Symbol;Acc:1307918]
ENSRNOG00000069938	36.4868	-0.271075	0.251004	-1.07997	0.280158	0.403995	ENSRNOG00000069938
ENSRNOG00000013949	1546.85	-0.348293	0.0577723	-6.02871	1.65274e-09	2.65077e-08	ENSRNOG00000013949	Idh2	isocitrate dehydrogenase (NADP(+)) 2 [Source:RGD Symbol;Acc:1597139]
ENSRNOG00000065858	123.279	0.673427	0.154528	4.35795	1.31286e-05	8.32612e-05	ENSRNOG00000065858
ENSRNOG00000016103	173.324	-0.58007	0.163403	-3.54993	0.000385337	0.00162345	ENSRNOG00000016103	Nkd2	NKD inhibitor of WNT signaling pathway 2 [Source:RGD Symbol;Acc:1311459]
ENSRNOG00000020643	896.636	0.0646025	0.0669606	0.964784	0.334653	0.462842	ENSRNOG00000020643	Bub3	BUB3 mitotic checkpoint protein [Source:RGD Symbol;Acc:1306654]
ENSRNOG00000018217	75.877	-0.638858	0.255021	-2.50512	0.0122409	0.0317177	ENSRNOG00000018217	Syt5	synaptotagmin 5 [Source:RGD Symbol;Acc:3806]
ENSRNOG00000058790	2188.88	0.263795	0.0515758	5.11471	3.1423e-07	2.98989e-06	ENSRNOG00000058790	Fam120b	family with sequence similarity 120B [Source:RGD Symbol;Acc:1310304]
ENSRNOG00000020371	109.834	-0.0221435	0.193028	-0.114716	0.90867	0.939531	ENSRNOG00000020371	Pgap2	post-GPI attachment to proteins 2 [Source:RGD Symbol;Acc:619744]
ENSRNOG00000014996	158.244	-0.0251734	0.123881	-0.203206	0.838974	0.89406	ENSRNOG00000014996	Katna1	katanin catalytic subunit A1 [Source:RGD Symbol;Acc:1303062]
ENSRNOG00000067296	283.472	0.472352	0.106963	4.41604	1.00527e-05	6.5051e-05	ENSRNOG00000067296	LOC108348090	zinc finger protein OZF-like [Source:RGD Symbol;Acc:11436011]
ENSRNOG00000017914	187.096	-0.704041	0.124722	-5.6449	1.6528e-08	2.11163e-07	ENSRNOG00000017914	Cavin3	caveolae associated protein 3 [Source:RGD Symbol;Acc:628755]
ENSRNOG00000014705	25.3639	0.641806	0.49997	1.28369	0.199251	0.309734	ENSRNOG00000014705	Rbm20	RNA binding motif protein 20 [Source:RGD Symbol;Acc:1307427]
ENSRNOG00000070027	173.43	-0.359537	0.131241	-2.73952	0.00615283	0.0177211	ENSRNOG00000070027
ENSRNOG00000009932	179.496	0.711878	0.149547	4.76022	1.93378e-06	1.51341e-05	ENSRNOG00000009932	Mctp2	multiple C2 and transmembrane domain containing 2 [Source:RGD Symbol;Acc:1562967]
ENSRNOG00000020865	132.42	-0.487902	0.173233	-2.81645	0.00485571	0.0145282	ENSRNOG00000020865	Ano1	anoctamin 1 [Source:RGD Symbol;Acc:1310786]
ENSRNOG00000020714	84.7597	-0.558067	0.193358	-2.88619	0.00389941	0.0120568	ENSRNOG00000020714	Trpm4	transient receptor potential cation channel, subfamily M, member 4 [Source:RGD Symbol;Acc:620244]
ENSRNOG00000015825	756.475	-0.195737	0.0927658	-2.11002	0.0348568	0.0757436	ENSRNOG00000015825	Aurkc	aurora kinase C [Source:RGD Symbol;Acc:1309573]
ENSRNOG00000064970	115.715	0.52933	0.160511	3.29779	0.000974489	0.00365058	ENSRNOG00000064970	Zfp939	zinc finger protein 939 [Source:RGD Symbol;Acc:1584032]
ENSRNOG00000030127	3910.8	-0.164675	0.0860442	-1.91385	0.0556395	0.110908	ENSRNOG00000030127	Eml2	EMAP like 2 [Source:RGD Symbol;Acc:621066]
ENSRNOG00000027098	4288.21	0.043681	0.0664595	0.657258	0.511015	0.631921	ENSRNOG00000027098	Sez6l2	seizure related 6 homolog like 2 [Source:RGD Symbol;Acc:1565281]
ENSRNOG00000017311	1098.42	0.0986239	0.0567613	1.73752	0.0822952	0.152624	ENSRNOG00000017311	Me3	malic enzyme 3 [Source:RGD Symbol;Acc:1311070]
ENSRNOG00000019270	127.827	-0.510379	0.150256	-3.39672	0.000681976	0.00267494	ENSRNOG00000019270	P2ry6	pyrimidinergic receptor P2Y6 [Source:RGD Symbol;Acc:620269]
ENSRNOG00000066986	127.099	0.0483518	0.161436	0.29951	0.764551	0.838779	ENSRNOG00000066986	Zfp619	zinc finger protein 619 [Source:RGD Symbol;Acc:7710512]
ENSRNOG00000018762	82.913	0.080403	0.165481	0.485874	0.627056	0.73137	ENSRNOG00000018762	Rsph3	radial spoke head 3 [Source:RGD Symbol;Acc:1311306]
ENSRNOG00000015956	2014.95	0.431068	0.0741256	5.81537	6.04995e-09	8.53116e-08	ENSRNOG00000015956	Usp29	ubiquitin specific peptidase 29 [Source:RGD Symbol;Acc:1306648]
ENSRNOG00000018019	4596.93	0.353171	0.0612531	5.76577	8.12864e-09	1.11372e-07	ENSRNOG00000018019	Hspa12a	heat shock protein family A (Hsp70) member 12A [Source:RGD Symbol;Acc:1305531]
ENSRNOG00000046036	52.1936	-0.149185	0.219825	-0.678654	0.497357	0.619696	ENSRNOG00000046036	Itprip	inositol 1,4,5-trisphosphate receptor interacting protein [Source:RGD Symbol;Acc:6488464]
ENSRNOG00000016372	197.28	-0.554656	0.129567	-4.28083	1.86201e-05	0.00011307	ENSRNOG00000016372	Slc12a7	solute carrier family 12 member 7 [Source:RGD Symbol;Acc:1359672]
ENSRNOG00000064277	54.3383	-0.731597	0.238663	-3.0654	0.00217382	0.00732346	ENSRNOG00000064277
ENSRNOG00000068327	626.608	-0.0274055	0.0788637	-0.347505	0.728212	0.812761	ENSRNOG00000068327	Pdcd5	programmed cell death 5 [Source:RGD Symbol;Acc:1310561]
ENSRNOG00000019812	1044.99	-0.618457	0.131084	-4.71801	2.38163e-06	1.82194e-05	ENSRNOG00000019812	Nr1h2	nuclear receptor subfamily 1, group H, member 2 [Source:RGD Symbol;Acc:61906]
ENSRNOG00000070842	66.3199	-0.131428	0.207617	-0.633031	0.526713	0.646466	ENSRNOG00000070842
ENSRNOG00000025940	2799.07	0.150395	0.0973897	1.54426	0.122526	0.210446	ENSRNOG00000025940	Mettl9	methyltransferase like 9 [Source:RGD Symbol;Acc:2311609]
ENSRNOG00000020393	1828.2	-0.358998	0.071564	-5.01647	5.26294e-07	4.74776e-06	ENSRNOG00000020393	Rhog	ras homolog family member G [Source:RGD Symbol;Acc:621310]
ENSRNOG00000067076	173.807	0.172976	0.127394	1.3578	0.174526	0.278878	ENSRNOG00000067076	Frat1	FRAT regulator of WNT signaling pathway 1 [Source:RGD Symbol;Acc:9147096]
ENSRNOG00000014969	869.584	-0.753707	0.149035	-5.05725	4.25342e-07	3.91985e-06	ENSRNOG00000014969	Lzts2	leucine zipper tumor suppressor 2 [Source:RGD Symbol;Acc:1359249]
ENSRNOG00000010840	33.4966	-0.14464	0.254681	-0.567926	0.570086	0.682714	ENSRNOG00000010840	Adamtsl3	ADAMTS-like 3 [Source:RGD Symbol;Acc:1305155]
ENSRNOG00000067278	436.192	0.406069	0.129122	3.14485	0.00166173	0.00581586	ENSRNOG00000067278	LOC108349532	high mobility group protein B1 pseudogene [Source:RGD Symbol;Acc:11382437]
ENSRNOG00000010308	232.827	0.0748985	0.212755	0.352041	0.724807	0.810535	ENSRNOG00000010308	Nr2f2	nuclear receptor subfamily 2, group F, member 2 [Source:RGD Symbol;Acc:69305]
ENSRNOG00000017277	28.1469	0.0637717	0.38319	0.166423	0.867824	0.913035	ENSRNOG00000017277	Igsf6	immunoglobulin superfamily, member 6 [Source:RGD Symbol;Acc:620663]
ENSRNOG00000017851	152.561	-0.237247	0.122464	-1.93728	0.0527107	0.106017	ENSRNOG00000017851	Etfb	electron transfer flavoprotein subunit beta [Source:RGD Symbol;Acc:1303312]
ENSRNOG00000011439	281.381	-0.0125546	0.102257	-0.122774	0.902286	0.935518	ENSRNOG00000011439	Grk5	G protein-coupled receptor kinase 5 [Source:RGD Symbol;Acc:61985]
ENSRNOG00000017635	1456.52	0.0776269	0.0618772	1.25453	0.209649	0.322046	ENSRNOG00000017635	Inpp5a	inositol polyphosphate-5-phosphatase A [Source:RGD Symbol;Acc:1306168]
ENSRNOG00000056397	35.5548	-0.0915612	0.266438	-0.343649	0.73111	0.814349	ENSRNOG00000056397	LOC120100233	small nucleolar RNA SNORD22 [Source:RGD Symbol;Acc:40941034]
ENSRNOG00000068081	301.293	0.131967	0.0897389	1.47056	0.14141	0.236074	ENSRNOG00000068081
ENSRNOG00000065098	1612.23	0.290892	0.0748796	3.8848	0.000102413	0.000506576	ENSRNOG00000065098	Hmgb1-ps4	high-mobility group box 1, pseudogene 4 [Source:RGD Symbol;Acc:1596834]
ENSRNOG00000029394	1060.08	-0.373404	0.0869073	-4.29658	1.73456e-05	0.000106219	ENSRNOG00000029394	Dusp8	dual specificity phosphatase 8 [Source:RGD Symbol;Acc:1306425]
ENSRNOG00000017884	36.9957	0.333824	0.255973	1.30414	0.192186	0.301164	ENSRNOG00000017884	Dnajb6-ps10	DnaJ heat shock protein family (Hsp40) member B6, pseudogene 10 [Source:RGD Symbol;Acc:1583989]
ENSRNOG00000064417	157.539	0.217624	0.125191	1.73834	0.0821514	0.152452	ENSRNOG00000064417
ENSRNOG00000021082	1684.77	-0.119431	0.0545662	-2.18873	0.0286165	0.0645359	ENSRNOG00000021082	Kdelr1	KDEL endoplasmic reticulum protein retention receptor 1 [Source:RGD Symbol;Acc:1306764]
ENSRNOG00000066269	84.4511	0.111694	0.179117	0.623583	0.532901	0.652561	ENSRNOG00000066269
ENSRNOG00000020197	151.067	-0.873223	0.150989	-5.78335	7.32281e-09	1.01447e-07	ENSRNOG00000020197	Cd248	endosialin [Source:RGD Symbol;Acc:11367424]
ENSRNOG00000016687	202.714	-0.265791	0.180058	-1.47614	0.139906	0.234085	ENSRNOG00000016687	Ssc5d	scavenger receptor cysteine rich family member with 5 domains [Source:RGD Symbol;Acc:1565772]
ENSRNOG00000059984	143.452	-0.187496	0.144448	-1.29802	0.194282	0.303683	ENSRNOG00000059984	Dll1	delta like canonical Notch ligand 1 [Source:RGD Symbol;Acc:70949]
ENSRNOG00000020363	1463.84	-0.675578	0.116962	-5.77603	7.64824e-09	1.05564e-07	ENSRNOG00000020363	Med25	mediator complex subunit 25 [Source:RGD Symbol;Acc:1305137]
ENSRNOG00000020871	653.678	-0.765887	0.150723	-5.08143	3.74604e-07	3.49755e-06	ENSRNOG00000020871	Ltbp4	latent transforming growth factor beta binding protein 4 [Source:RGD Symbol;Acc:1307033]
ENSRNOG00000033843	31.1949	0.55562	0.304936	1.82209	0.0684414	0.131381	ENSRNOG00000033843	AABR07007121.1
ENSRNOG00000021151	521.124	-0.475028	0.104964	-4.52564	6.02122e-06	4.11171e-05	ENSRNOG00000021151	Ppp1r14b	protein phosphatase 1, regulatory (inhibitor) subunit 14B [Source:RGD Symbol;Acc:628702]
ENSRNOG00000018310	119.31	-0.253012	0.168204	-1.50419	0.132531	0.223825	ENSRNOG00000018310	Eno4	enolase 4 [Source:RGD Symbol;Acc:1308333]
ENSRNOG00000030404	650.108	-0.364077	0.105891	-3.43824	0.000585519	0.00234396	ENSRNOG00000030404	Arrb1	arrestin, beta 1 [Source:RGD Symbol;Acc:2156]
ENSRNOG00000067564	559.519	0.5967	0.111855	5.33456	9.57764e-08	1.04045e-06	ENSRNOG00000067564
ENSRNOG00000014004	981.276	0.58058	0.0797799	7.27727	3.40643e-13	1.17597e-11	ENSRNOG00000014004	Ncoa7	nuclear receptor coactivator 7 [Source:RGD Symbol;Acc:1566426]
ENSRNOG00000047816	527.004	-0.0341518	0.0720621	-0.473922	0.635556	0.73846	ENSRNOG00000047816	Ccs	copper chaperone for superoxide dismutase [Source:RGD Symbol;Acc:620403]
ENSRNOG00000018433	242.714	-0.087072	0.131112	-0.664104	0.506624	0.628339	ENSRNOG00000018433	Hps6	HPS6, biogenesis of lysosomal organelles complex 2 subunit 3 [Source:RGD Symbol;Acc:631341]
ENSRNOG00000020925	423.025	-0.140312	0.0872502	-1.60816	0.1078	0.190698	ENSRNOG00000020925	Ccdc86	coiled-coil domain containing 86 [Source:RGD Symbol;Acc:1359280]
ENSRNOG00000064594	195.934	0.609528	0.145352	4.19346	2.7473e-05	0.000159234	ENSRNOG00000064594
ENSRNOG00000070917	26.5702	-0.39285	0.327328	-1.20017	0.230072	0.346253	ENSRNOG00000070917	LOC102556098	zinc finger protein 729-like [Source:RGD Symbol;Acc:7732163]
ENSRNOG00000012140	327.622	-0.339425	0.111606	-3.04128	0.00235578	0.00783758	ENSRNOG00000012140	Cep89	centrosomal protein 89 [Source:RGD Symbol;Acc:1311730]
ENSRNOG00000014828	310.84	-0.11903	0.0967802	-1.2299	0.218734	0.33255	ENSRNOG00000014828	Avpi1	arginine vasopressin-induced 1 [Source:RGD Symbol;Acc:621721]
ENSRNOG00000020497	2441.22	0.230978	0.0715746	3.22709	0.00125054	0.00452948	ENSRNOG00000020497	Plekha1	pleckstrin homology domain containing A1 [Source:RGD Symbol;Acc:1564153]
ENSRNOG00000070030	35.2105	-0.0506062	0.311071	-0.162684	0.870768	0.914831	ENSRNOG00000070030
ENSRNOG00000025154	544.493	0.359838	0.0882036	4.07964	4.51061e-05	0.000245627	ENSRNOG00000025154	Snu13	NHP2 non-histone chromosome protein 2-like 1-like [Source:RGD Symbol;Acc:2323620]
ENSRNOG00000014448	640.682	0.201287	0.0896951	2.24413	0.0248241	0.0572198	ENSRNOG00000014448	Bmal1	basic helix-loop-helix ARNT like 1 [Source:RGD Symbol;Acc:62003]
ENSRNOG00000015753	4853.62	-0.703196	0.105556	-6.6618	2.70489e-11	6.3176e-10	ENSRNOG00000015753	Epn1	Epsin 1 [Source:RGD Symbol;Acc:619772]
ENSRNOG00000067461	51.0155	0.486939	0.225983	2.15476	0.0311809	0.0690581	ENSRNOG00000067461	Rps12l2	ribosomal protein S12-like 2 [Source:RGD Symbol;Acc:2321899]
ENSRNOG00000028781	109.272	-0.953415	0.201903	-4.72215	2.33367e-06	1.78983e-05	ENSRNOG00000028781	Abcc6	ATP binding cassette subfamily C member 6 [Source:RGD Symbol;Acc:620268]
ENSRNOG00000064885	95.0555	-0.0986244	0.165329	-0.596534	0.550818	0.667365	ENSRNOG00000064885
ENSRNOG00000054561	33.5432	-0.246727	0.336665	-0.732857	0.463646	0.588884	ENSRNOG00000054561	Isg20	interferon stimulated exonuclease gene 20 [Source:RGD Symbol;Acc:1306407]
ENSRNOG00000065383	45.7857	-0.143509	0.232508	-0.61722	0.537089	0.656255	ENSRNOG00000065383
ENSRNOG00000063169	21.0728	0.138413	0.482407	0.28692	0.774173	0.845808	ENSRNOG00000063169	LOC102548076	zinc finger protein 120-like [Source:RGD Symbol;Acc:7716527]
ENSRNOG00000069489	117.255	0.33225	0.196907	1.68734	0.0915372	0.166581	ENSRNOG00000069489
ENSRNOG00000019491	1979.72	-0.352392	0.0882819	-3.99167	6.56098e-05	0.000344238	ENSRNOG00000019491	Stard10	StAR-related lipid transfer domain containing 10 [Source:RGD Symbol;Acc:1306548]
ENSRNOG00000019626	21.3966	-0.177063	0.380038	-0.46591	0.64128	0.743227	ENSRNOG00000019626	Slc27a5	solute carrier family 27 member 5 [Source:RGD Symbol;Acc:708535]
ENSRNOG00000031381	159.646	0.00363737	0.136038	0.026738	0.978669	0.987321	ENSRNOG00000031381	RGD1561333	similar to 60S ribosomal protein L8 [Source:RGD Symbol;Acc:1561333]
ENSRNOG00000021153	2111.67	-0.082611	0.0684803	-1.20635	0.227684	0.34371	ENSRNOG00000021153	Fkbp2	FKBP prolyl isomerase 2 [Source:RGD Symbol;Acc:1560660]
ENSRNOG00000037137	969.072	0.165726	0.0693772	2.38877	0.0169051	0.0415278	ENSRNOG00000037137	Svip	small VCP interacting protein [Source:RGD Symbol;Acc:1565432]
ENSRNOG00000014380	449.415	0.156212	0.0816361	1.91352	0.0556818	0.110963	ENSRNOG00000014380	LOC102555672	zinc finger protein 850-like [Source:RGD Symbol;Acc:7701959]
ENSRNOG00000017150	335.683	-0.061435	0.106073	-0.579176	0.56247	0.67663	ENSRNOG00000017150	Med10	mediator complex subunit 10 [Source:RGD Symbol;Acc:1310128]
ENSRNOG00000020517	46.8175	-0.607764	0.236128	-2.57388	0.0100566	0.026839	ENSRNOG00000020517	Prrg2	proline rich and Gla domain 2 [Source:RGD Symbol;Acc:1305444]
ENSRNOG00000062805	370.71	-0.0629808	0.10307	-0.611051	0.541166	0.659224	ENSRNOG00000062805	Or14c39	olfactory receptor family 14 subfamily C member 39 [Source:RGD Symbol;Acc:1333763]
ENSRNOG00000015717	463.013	0.0718278	0.0824707	0.870949	0.383782	0.51098	ENSRNOG00000015717	Ptpre	protein tyrosine phosphatase, receptor type, E [Source:RGD Symbol;Acc:620771]
ENSRNOG00000015914	3510.53	-0.0362781	0.0527541	-0.687683	0.491653	0.614689	ENSRNOG00000015914	U2af2	U2 small nuclear RNA auxiliary factor 2 [Source:RGD Symbol;Acc:1310690]
ENSRNOG00000019141	64.7127	-0.0100356	0.279738	-0.035875	0.971382	0.98246	ENSRNOG00000019141	Ch25h	cholesterol 25-hydroxylase [Source:RGD Symbol;Acc:1310575]
ENSRNOG00000067799	258.271	-0.148236	0.146635	-1.01092	0.312055	0.439186	ENSRNOG00000067799	Selenow	selenoprotein W [Source:RGD Symbol;Acc:3661]
ENSRNOG00000019582	351.523	0.103771	0.0996071	1.0418	0.297503	0.423814	ENSRNOG00000019582	Mthfd1l	methylenetetrahydrofolate dehydrogenase (NADP+ dependent) 1-like [Source:RGD Symbol;Acc:1307311]
ENSRNOG00000019440	35.5412	0.549053	0.320488	1.71318	0.0866795	0.159077	ENSRNOG00000019440	Kcnn4	potassium calcium-activated channel subfamily N member 4 [Source:RGD Symbol;Acc:621476]
ENSRNOG00000036711	36.9799	0.171366	0.258397	0.663189	0.50721	0.628619	ENSRNOG00000036711	Spn	sialophorin [Source:RGD Symbol;Acc:3750]
ENSRNOG00000013149	404.966	-0.021797	0.082451	-0.264363	0.7915	0.858801	ENSRNOG00000013149	Vps33b	VPS33B, late endosome and lysosome associated [Source:RGD Symbol;Acc:620644]
ENSRNOG00000018048	1284.44	0.145103	0.0562313	2.58046	0.00986686	0.0263893	ENSRNOG00000018048	Dctn5	dynactin subunit 5 [Source:RGD Symbol;Acc:1305654]
ENSRNOG00000010224	487.456	0.352894	0.0883192	3.99566	6.45134e-05	0.000338843	ENSRNOG00000010224	Rab30	RAB30, member RAS oncogene family [Source:RGD Symbol;Acc:1309507]
ENSRNOG00000063596	28.2034	0.373808	0.295161	1.26646	0.20535	0.316974	ENSRNOG00000063596
ENSRNOG00000029043	563.845	0.16497	0.0854982	1.92951	0.0536672	0.107589	ENSRNOG00000029043	Zfp790	zinc finger protein 790 [Source:RGD Symbol;Acc:1309815]
ENSRNOG00000017095	60.5172	0.416573	0.212791	1.95767	0.0502691	0.102095	ENSRNOG00000017095	Dlat-ps1	dihydrolipoamide S-acetyltransferase, pseudogene 1 [Source:RGD Symbol;Acc:1583609]
ENSRNOG00000018421	163.469	0.038257	0.139362	0.274516	0.783688	0.852776	ENSRNOG00000018421	Aen	apoptosis enhancing nuclease [Source:RGD Symbol;Acc:1305051]
ENSRNOG00000019681	157.52	-0.629867	0.167695	-3.75602	0.000172634	0.000802654	ENSRNOG00000019681	Pold1	DNA polymerase delta 1, catalytic subunit [Source:RGD Symbol;Acc:621839]
ENSRNOG00000020202	3899.85	-0.467887	0.0572361	-8.17468	2.96655e-16	1.7953e-14	ENSRNOG00000020202	Asrgl1	asparaginase and isoaspartyl peptidase 1 [Source:RGD Symbol;Acc:708526]
ENSRNOG00000017613	812.551	0.0141381	0.0654229	0.216103	0.828908	0.886747	ENSRNOG00000017613	Tent4a	terminal nucleotidyltransferase 4A [Source:RGD Symbol;Acc:1307356]
ENSRNOG00000055519	99.8265	-0.0840414	0.171203	-0.490887	0.623506	0.728195	ENSRNOG00000055519	Zfp790	zinc finger protein 790 [Source:RGD Symbol;Acc:1309815]
ENSRNOG00000011234	26.633	0.215511	0.314075	0.686177	0.492602	0.615543	ENSRNOG00000011234	Taf5l-ps1	TATA-box binding protein associated factor 5 like, pseudogene 1 [Source:RGD Symbol;Acc:1582831]
ENSRNOG00000015997	889.858	-0.293198	0.0972945	-3.01351	0.00258248	0.00846495	ENSRNOG00000015997	Ccdc106	coiled-coil domain containing 106 [Source:RGD Symbol;Acc:1566222]
ENSRNOG00000064983	39.6999	0.706548	0.291553	2.4234	0.0153761	0.0383952	ENSRNOG00000064983
ENSRNOG00000015773	33.12	0.0242715	0.269255	0.0901432	0.928173	0.952254	ENSRNOG00000015773	Il21r	interleukin 21 receptor [Source:RGD Symbol;Acc:1304950]
ENSRNOG00000055020	106.429	0.375363	0.183541	2.04512	0.0408435	0.086245	ENSRNOG00000055020	LOC679731	hypothetical protein LOC679731 [Source:RGD Symbol;Acc:1584810]
ENSRNOG00000066969	105.252	0.0900102	0.170779	0.527056	0.598155	0.705979	ENSRNOG00000066969	Zfp790	zinc finger protein 420-like [Source:RGD Symbol;Acc:150344952]
ENSRNOG00000014251	613.534	-0.238867	0.100287	-2.38183	0.0172267	0.0421645	ENSRNOG00000014251	Capn5	calpain 5 [Source:RGD Symbol;Acc:620084]
ENSRNOG00000066794	244.763	-0.0426283	0.118956	-0.358354	0.720078	0.806997	ENSRNOG00000066794
ENSRNOG00000025539	910.732	0.429584	0.077038	5.57626	2.45751e-08	2.99631e-07	ENSRNOG00000025539	Vps13a	vacuolar protein sorting 13 homolog A [Source:RGD Symbol;Acc:1311340]
ENSRNOG00000012716	1049.67	-0.0484355	0.0883488	-0.548231	0.583534	0.693872	ENSRNOG00000012716	Chd2	chromodomain helicase DNA binding protein 2 [Source:RGD Symbol;Acc:1310056]
ENSRNOG00000063182	251.687	0.0343026	0.114817	0.29876	0.765123	0.839176	ENSRNOG00000063182
ENSRNOG00000016011	277.765	-0.334122	0.106374	-3.14102	0.0016836	0.00587895	ENSRNOG00000016011	Plekhg1	pleckstrin homology and RhoGEF domain containing G1 [Source:RGD Symbol;Acc:1583676]
ENSRNOG00000020014	1666.43	-0.872237	0.117062	-7.45105	9.26026e-14	3.66197e-12	ENSRNOG00000020014	Myh14	myosin heavy chain 14 [Source:RGD Symbol;Acc:1306821]
ENSRNOG00000055082	2191.92	-0.267549	0.0683288	-3.91562	9.01739e-05	0.000454103	ENSRNOG00000055082	Maz	MYC associated zinc finger protein [Source:RGD Symbol;Acc:1594632]
ENSRNOG00000019129	36.2989	0.298792	0.285075	1.04812	0.294585	0.420377	ENSRNOG00000019129	Fcgbp	Fc gamma binding protein [Source:RGD Symbol;Acc:2313189]
ENSRNOG00000017960	799.439	-0.370194	0.104072	-3.5571	0.000374975	0.00158337	ENSRNOG00000017960	Deaf1	DEAF1 transcription factor [Source:RGD Symbol;Acc:620671]
ENSRNOG00000056062	95.5608	0.263103	0.177852	1.47934	0.139049	0.232964	ENSRNOG00000056062	LOC100912787	zinc finger protein 850-like [Source:RGD Symbol;Acc:6485475]
ENSRNOG00000046683	28.5296	-0.313725	0.320718	-0.978195	0.327978	0.455889	ENSRNOG00000046683	Lilrb3	leukocyte immunoglobulin like receptor B3 [Source:RGD Symbol;Acc:1566307]
ENSRNOG00000052256	2764.58	-0.394986	0.0627693	-6.29266	3.12062e-10	5.75888e-09	ENSRNOG00000052256	Dact3	dishevelled-binding antagonist of beta-catenin 3 [Source:RGD Symbol;Acc:1563892]
ENSRNOG00000011931	3439.69	0.0947184	0.0672776	1.40787	0.159168	0.259394	ENSRNOG00000011931	Smarca2	SWI/SNF related, matrix associated, actin dependent regulator of chromatin, subfamily a, member 2 [Source:RGD Symbol;Acc:1302988]
ENSRNOG00000037556	372.188	0.0828192	0.0818525	1.01181	0.311629	0.438751	ENSRNOG00000037556	Zfp420	zinc finger protein 420 [Source:RGD Symbol;Acc:2323829]
ENSRNOG00000068138	44.7343	0.418871	0.299134	1.40028	0.161429	0.262345	ENSRNOG00000068138	Aldh3b2	aldehyde dehydrogenase 3 family, member B2 [Source:RGD Symbol;Acc:1584166]
ENSRNOG00000012301	187.603	0.0117481	0.12438	0.0944534	0.924749	0.950222	ENSRNOG00000012301	Cfap161	cilia and flagella associated protein 161 [Source:RGD Symbol;Acc:1310371]
ENSRNOG00000070848	277.75	0.186258	0.115208	1.61671	0.10594	0.188009	ENSRNOG00000070848	Zfp27	zinc finger protein 27 [Source:RGD Symbol;Acc:2318958]
ENSRNOG00000013160	1499.16	-0.0789547	0.0935416	-0.84406	0.398636	0.526025	ENSRNOG00000013160	Sash1	SAM and SH3 domain containing 1 [Source:RGD Symbol;Acc:1566017]
ENSRNOG00000024077	38.1815	0.142121	0.28226	0.503512	0.614605	0.720049	ENSRNOG00000024077	Fbxo5	F-box protein 5 [Source:RGD Symbol;Acc:1309405]
ENSRNOG00000069496	50.5331	0.0155793	0.216036	0.072114	0.942511	0.962734	ENSRNOG00000069496
ENSRNOG00000020456	568.343	-0.0792568	0.0836619	-0.947346	0.343462	0.471146	ENSRNOG00000020456	Nucb2	nucleobindin 2 [Source:RGD Symbol;Acc:620888]
ENSRNOG00000019802	377.746	-0.145452	0.16444	-0.884534	0.376408	0.503855	ENSRNOG00000019802	Zfp428	zinc finger protein 428 [Source:RGD Symbol;Acc:1564862]
ENSRNOG00000065781	71.4502	0.56254	1.14401	0.491728	0.622912	0.727728	ENSRNOG00000065781
ENSRNOG00000062668	27.0544	-0.130482	0.296088	-0.440689	0.659438	0.759304	ENSRNOG00000062668
ENSRNOG00000012806	1501.18	0.0250226	0.0542779	0.461009	0.644792	0.746292	ENSRNOG00000012806	Rbbp6	RB binding protein 6, ubiquitin ligase [Source:RGD Symbol;Acc:1311964]
ENSRNOG00000019497	1513.24	0.10094	0.0573509	1.76004	0.0784009	0.146859	ENSRNOG00000019497	Mrpl17	mitochondrial ribosomal protein L17 [Source:RGD Symbol;Acc:70943]
ENSRNOG00000045545	40.3573	-0.0995332	0.230028	-0.432701	0.665232	0.763564	ENSRNOG00000045545	Eid2b	EP300 interacting inhibitor of differentiation 2B [Source:RGD Symbol;Acc:9381183]
ENSRNOG00000064214	1323.64	0.898818	0.101492	8.85608	8.2877e-19	8.20428e-17	ENSRNOG00000064214
ENSRNOG00000037331	290.081	-0.0286631	0.105378	-0.272002	0.78562	0.854263	ENSRNOG00000037331	Cd33	CD33 molecule [Source:RGD Symbol;Acc:1596020]
ENSRNOG00000062784	47.9528	-0.182815	0.240705	-0.759497	0.447556	0.573958	ENSRNOG00000062784
ENSRNOG00000020774	477.911	0.340823	0.0945259	3.6056	0.00031143	0.00135209	ENSRNOG00000020774	Zfp420	zinc finger protein 383-like [Source:RGD Symbol;Acc:9160828]
ENSRNOG00000037897	6678.98	-0.340095	0.0694099	-4.8998	9.59328e-07	8.1385e-06	ENSRNOG00000037897	Rps19	ribosomal protein S19 [Source:RGD Symbol;Acc:68440]
ENSRNOG00000016831	1006.55	-0.523397	0.0826717	-6.33104	2.43518e-10	4.57875e-09	ENSRNOG00000016831	Serpinh1	serpin family H member 1 [Source:RGD Symbol;Acc:69302]
ENSRNOG00000024280	100.733	-0.237142	0.162204	-1.462	0.143742	0.238804	ENSRNOG00000024280	Ccdc170	coiled-coil domain containing 170 [Source:RGD Symbol;Acc:1310945]
ENSRNOG00000055683	27.5111	0.290967	0.303149	0.959814	0.337149	0.465001	ENSRNOG00000055683	Cct7-ps1	chaperonin containing Tcp1, subunit 7 (eta), pseudogene 1 [Source:RGD Symbol;Acc:1562884]
ENSRNOG00000056228	493.176	-0.304213	0.0977285	-3.11284	0.00185299	0.00636308	ENSRNOG00000056228	Atp10a	ATPase phospholipid transporting 10A (putative) [Source:RGD Symbol;Acc:1306150]
ENSRNOG00000028743	689.788	-0.395075	0.106856	-3.69728	0.000217925	0.000990435	ENSRNOG00000028743	Gal3st3	galactose-3-O-sulfotransferase 3 [Source:RGD Symbol;Acc:1564991]
ENSRNOG00000028273	581.462	-0.301446	0.0769321	-3.91833	8.91635e-05	0.000450124	ENSRNOG00000028273	Tmem150b	transmembrane protein 150B [Source:RGD Symbol;Acc:1306181]
ENSRNOG00000023233	173.249	0.12609	0.117961	1.06891	0.285111	0.409438	ENSRNOG00000023233	Zfp658	zinc finger protein 658 [Source:RGD Symbol;Acc:7541917]
ENSRNOG00000034075	597.989	0.462942	0.0913652	5.06694	4.04258e-07	3.7417e-06	ENSRNOG00000034075	Ube2ql1	ubiquitin-conjugating enzyme E2Q family-like 1 [Source:RGD Symbol;Acc:1598121]
ENSRNOG00000014341	1082.1	0.331044	0.0800921	4.1333	3.57599e-05	0.000200653	ENSRNOG00000014341	Btbd10	BTB domain containing 10 [Source:RGD Symbol;Acc:1306301]
ENSRNOG00000069950	78.0127	0.128822	0.183293	0.702816	0.48217	0.606384	ENSRNOG00000069950
ENSRNOG00000020543	584.699	-0.290928	0.119156	-2.44158	0.0146232	0.0368426	ENSRNOG00000020543	Nosip	nitric oxide synthase interacting protein [Source:RGD Symbol;Acc:1309992]
ENSRNOG00000020298	437.321	-0.405474	0.1251	-3.2412	0.00119028	0.00434307	ENSRNOG00000020298	Bag3	BAG cochaperone 3 [Source:RGD Symbol;Acc:1307794]
ENSRNOG00000018255	4761.34	-0.134193	0.054675	-2.45438	0.0141128	0.0357579	ENSRNOG00000018255	Clptm1	CLPTM1 regulator of GABA type A receptor forward trafficking [Source:RGD Symbol;Acc:1310959]
ENSRNOG00000066399	824.941	0.0227417	0.0761217	0.298754	0.765128	0.839176	ENSRNOG00000066399
ENSRNOG00000021000	95.0056	-0.407615	0.174474	-2.33626	0.0194779	0.0467121	ENSRNOG00000021000	Naaladl1	N-acetylated alpha-linked acidic dipeptidase-like 1 [Source:RGD Symbol;Acc:620987]
ENSRNOG00000062327	714.468	0.36511	0.0926084	3.94251	8.06326e-05	0.000411364	ENSRNOG00000062327
ENSRNOG00000033729	245.889	0.210928	0.113259	1.86235	0.0625539	0.12215	ENSRNOG00000033729	LOC102556967	zinc finger protein 484-like [Source:RGD Symbol;Acc:7510716]
ENSRNOG00000020716	1411.57	-0.60327	0.0664488	-9.07871	1.09866e-19	1.39176e-17	ENSRNOG00000020716	Axl	Axl receptor tyrosine kinase [Source:RGD Symbol;Acc:620028]
ENSRNOG00000011488	389.841	0.0215336	0.0869301	0.247712	0.804357	0.86781	ENSRNOG00000011488	Sergef	secretion regulating guanine nucleotide exchange factor [Source:RGD Symbol;Acc:1563497]
ENSRNOG00000015441	258.267	-0.381551	0.137036	-2.78431	0.0053641	0.0157964	ENSRNOG00000015441	Il4r	interleukin 4 receptor [Source:RGD Symbol;Acc:2899]
ENSRNOG00000047057	61.4656	0.0123007	0.217901	0.0564509	0.954983	0.970632	ENSRNOG00000047057	Gpr26	G protein-coupled receptor 26 [Source:RGD Symbol;Acc:619843]
ENSRNOG00000020412	4037.67	-0.130801	0.0452502	-2.89061	0.00384495	0.0119241	ENSRNOG00000020412	Sf3b2	splicing factor 3b, subunit 2 [Source:RGD Symbol;Acc:1307159]
ENSRNOG00000016923	2165.8	0.0739147	0.046208	1.59961	0.109686	0.193347	ENSRNOG00000016923	Clptm1l	CLPTM1-like [Source:RGD Symbol;Acc:1307896]
ENSRNOG00000010938	1035.72	-0.790853	0.0929066	-8.51234	1.70451e-17	1.28035e-15	ENSRNOG00000010938	Slc7a10	solute carrier family 7 member 10 [Source:RGD Symbol;Acc:621672]
ENSRNOG00000065260	377.348	0.400239	0.104687	3.82319	0.000131737	0.000636255	ENSRNOG00000065260
ENSRNOG00000011029	662.589	0.0579727	0.0778798	0.744386	0.456643	0.582376	ENSRNOG00000011029	Sec11a	SEC11 homolog A, signal peptidase complex subunit [Source:RGD Symbol;Acc:69360]
ENSRNOG00000015239	426.552	0.0978108	0.106586	0.917667	0.358793	0.486506	ENSRNOG00000015239	Ginm1	glycosylated integral membrane protein 1 [Source:RGD Symbol;Acc:1309759]
ENSRNOG00000069539	254.095	-0.000196937	0.115353	-0.00170726	0.998638	0.998999	ENSRNOG00000069539	Zfp74	zinc finger protein 74 [Source:RGD Symbol;Acc:1563223]
ENSRNOG00000018426	432.234	-0.545981	0.114411	-4.77211	1.82303e-06	1.43803e-05	ENSRNOG00000018426	Apoc1	apolipoprotein C1 [Source:RGD Symbol;Acc:2134]
ENSRNOG00000020110	1686.42	0.143209	0.0631478	2.26783	0.0233393	0.0543844	ENSRNOG00000020110	B4gat1	beta-1,4-glucuronyltransferase 1 [Source:RGD Symbol;Acc:1309541]
ENSRNOG00000012084	1372.13	-0.222962	0.058274	-3.82609	0.000130194	0.000629821	ENSRNOG00000012084	Xpnpep1	X-prolyl aminopeptidase 1 [Source:RGD Symbol;Acc:621274]
ENSRNOG00000046652	104.941	-0.188023	0.151941	-1.23747	0.215913	0.329199	ENSRNOG00000046652	Zfp790	zinc finger protein 30 homolog [Source:RGD Symbol;Acc:11363847]
ENSRNOG00000013770	932.413	-0.148579	0.0920602	-1.61393	0.106542	0.188897	ENSRNOG00000013770	Folh1	folate hydrolase 1 [Source:RGD Symbol;Acc:70963]
ENSRNOG00000024961	491.83	-0.185572	0.0925845	-2.00436	0.0450317	0.0934648	ENSRNOG00000024961	Usp35	ubiquitin specific peptidase 35 [Source:RGD Symbol;Acc:1565984]
ENSRNOG00000017673	7652.61	-0.585349	0.0833037	-7.0267	2.11482e-12	6.25987e-11	ENSRNOG00000017673	Brsk1	BR serine/threonine kinase 1 [Source:RGD Symbol;Acc:1563268]
ENSRNOG00000032150	1928.7	-0.0521839	0.0616342	-0.846672	0.397178	0.52475	ENSRNOG00000032150	Adcy2	adenylate cyclase 2 [Source:RGD Symbol;Acc:619965]
ENSRNOG00000018356	1292.81	-0.0193186	0.0812427	-0.237789	0.812045	0.874213	ENSRNOG00000018356	Trim3	tripartite motif-containing 3 [Source:RGD Symbol;Acc:70074]
ENSRNOG00000023753	1779.59	0.178923	0.0618433	2.89317	0.00381377	0.0118348	ENSRNOG00000023753	Afdn	afadin, adherens junction formation factor [Source:RGD Symbol;Acc:708561]
ENSRNOG00000030932	531.232	-0.102143	0.0784564	-1.30191	0.192946	0.302132	ENSRNOG00000030932	Zfp14	ZFP14 zinc finger protein [Source:RGD Symbol;Acc:1560188]
ENSRNOG00000018761	3481.65	-0.0694659	0.0922883	-0.752705	0.451627	0.577792	ENSRNOG00000018761	Eif3c	eukaryotic translation initiation factor 3, subunit C [Source:RGD Symbol;Acc:1308871]
ENSRNOG00000030160	30.8124	0.101739	0.292971	0.347268	0.72839	0.812778	ENSRNOG00000030160	Zfp819	zinc finger protein 819 [Source:RGD Symbol;Acc:1309564]
ENSRNOG00000069633	123.823	0.0417298	0.15857	0.263164	0.792424	0.859341	ENSRNOG00000069633	Itpripl2	ITPRIP like 2 [Source:RGD Symbol;Acc:1564255]
ENSRNOG00000032946	204.614	-0.214109	0.179953	-1.18981	0.234123	0.350738	ENSRNOG00000032946	Pdzd7	PDZ domain containing 7 [Source:RGD Symbol;Acc:1309882]
ENSRNOG00000020743	161.016	0.354283	0.151346	2.34089	0.0192379	0.0462775	ENSRNOG00000020743	Cyp2s1	cytochrome P450, family 2, subfamily s, polypeptide 1 [Source:RGD Symbol;Acc:1306078]
ENSRNOG00000012362	1789.2	0.0735391	0.0596795	1.23223	0.217861	0.331494	ENSRNOG00000012362	Cacng3	calcium voltage-gated channel auxiliary subunit gamma 3 [Source:RGD Symbol;Acc:628803]
ENSRNOG00000014303	4985.39	0.336014	0.0558453	6.01687	1.77821e-09	2.82473e-08	ENSRNOG00000014303	Lrp11	LDL receptor related protein 11 [Source:RGD Symbol;Acc:1308602]
ENSRNOG00000018454	59762.7	-0.791914	0.156347	-5.06509	4.08207e-07	3.77358e-06	ENSRNOG00000018454	Apoe	apolipoprotein E [Source:RGD Symbol;Acc:2138]
ENSRNOG00000052023	27.8639	-0.211487	0.302579	-0.698951	0.484583	0.608651	ENSRNOG00000052023	LOC102547241	zinc finger protein 82 [Source:RGD Symbol;Acc:6499485]
ENSRNOG00000020531	593.667	0.0179916	0.0843634	0.213263	0.831122	0.88848	ENSRNOG00000020531	Fen1	flap structure-specific endonuclease 1 [Source:RGD Symbol;Acc:621821]
ENSRNOG00000019544	220.497	0.0512719	0.108648	0.471909	0.636992	0.739841	ENSRNOG00000019544	Zbtb2	zinc finger and BTB domain containing 2 [Source:RGD Symbol;Acc:1306621]
ENSRNOG00000020477	58.4839	0.414812	0.247066	1.67895	0.0931618	0.168941	ENSRNOG00000020477	LOC100911093	CCA tRNA nucleotidyltransferase 1, mitochondrial-like [Source:RGD Symbol;Acc:6494996]
ENSRNOG00000023549	203.819	0.0627411	0.154531	0.406009	0.684736	0.778893	ENSRNOG00000023549	Samd5	sterile alpha motif domain containing 5 [Source:RGD Symbol;Acc:1311012]
ENSRNOG00000021096	421.784	-0.160986	0.106919	-1.50568	0.132149	0.223294	ENSRNOG00000021096	Tmem143	transmembrane protein 143 [Source:RGD Symbol;Acc:1305013]
ENSRNOG00000022796	151.703	-0.362207	0.161804	-2.23856	0.0251848	0.0578994	ENSRNOG00000022796	Fgfbp3	fibroblast growth factor binding protein 3 [Source:RGD Symbol;Acc:1560326]
ENSRNOG00000029784	3497.28	0.161956	0.0515198	3.14358	0.00166896	0.00583571	ENSRNOG00000029784	Pak1	p21 (RAC1) activated kinase 1 [Source:RGD Symbol;Acc:3250]
ENSRNOG00000018885	715.172	0.421387	0.0822514	5.12316	3.00456e-07	2.87346e-06	ENSRNOG00000018885	Zfp780b	zinc finger protein 780B [Source:RGD Symbol;Acc:1592570]
ENSRNOG00000063852	953.921	-0.0480111	0.0604283	-0.794513	0.426897	0.553374	ENSRNOG00000063852	Tmem80	transmembrane protein 80 [Source:RGD Symbol;Acc:1308399]
ENSRNOG00000048138	298.058	-0.0239789	0.136133	-0.176143	0.860181	0.907922	ENSRNOG00000048138	Zfp566	zinc finger protein 566 [Source:RGD Symbol;Acc:1563239]
ENSRNOG00000019306	718.961	-0.26306	0.0827216	-3.18006	0.00147245	0.00523677	ENSRNOG00000019306	Syt12	synaptotagmin 12 [Source:RGD Symbol;Acc:621876]
ENSRNOG00000018440	1753.76	-0.0631328	0.0721167	-0.875426	0.381342	0.508795	ENSRNOG00000018440	Arfip2	ADP-ribosylation factor interacting protein 2 [Source:RGD Symbol;Acc:1303204]
ENSRNOG00000029082	579.649	-0.164445	0.0951828	-1.72768	0.0840461	0.155216	ENSRNOG00000029082	RGD1566189	similar to ferritin light chain [Source:RGD Symbol;Acc:1566189]
ENSRNOG00000021104	61.0478	-0.470502	0.228209	-2.06171	0.0392353	0.0834385	ENSRNOG00000021104	Emp3	epithelial membrane protein 3 [Source:RGD Symbol;Acc:621094]
ENSRNOG00000011451	952.038	-0.261093	0.0943755	-2.76653	0.00566564	0.0165313	ENSRNOG00000011451	Lrp3	LDL receptor related protein 3 [Source:RGD Symbol;Acc:619729]
ENSRNOG00000017254	1130.89	0.129087	0.0558616	2.31084	0.0208417	0.049481	ENSRNOG00000017254	Nsun2	NOP2/Sun RNA methyltransferase 2 [Source:RGD Symbol;Acc:1311954]
ENSRNOG00000020117	1056.51	-0.0518314	0.0634557	-0.816812	0.414036	0.540336	ENSRNOG00000020117	Brms1	BRMS1, transcriptional repressor and anoikis regulator [Source:RGD Symbol;Acc:1311057]
ENSRNOG00000050995	159.595	0.317886	0.129071	2.46289	0.0137823	0.0350848	ENSRNOG00000050995	Zfp780b	zinc finger protein 780B [Source:RGD Symbol;Acc:1592570]
ENSRNOG00000015503	599.972	-0.337233	0.128239	-2.62972	0.00854544	0.0233993	ENSRNOG00000015503	Otud7a	OTU deubiquitinase 7A [Source:RGD Symbol;Acc:1563721]
ENSRNOG00000021003	177.876	-0.340562	0.147488	-2.30908	0.0209389	0.0496739	ENSRNOG00000021003	Sac3d1	SAC3 domain containing 1 [Source:RGD Symbol;Acc:1308049]
ENSRNOG00000020274	118.61	0.153038	0.157254	0.973189	0.330459	0.458126	ENSRNOG00000020274	Taf5	TATA-box binding protein associated factor 5 [Source:RGD Symbol;Acc:1311332]
ENSRNOG00000065528	72.4529	0.110712	0.215175	0.514518	0.60689	0.713808	ENSRNOG00000065528	St8sia2	ST8 alpha-N-acetyl-neuraminide alpha-2,8-sialyltransferase 2 [Source:RGD Symbol;Acc:621843]
ENSRNOG00000022701	32.3189	-0.268891	0.281535	-0.955088	0.339533	0.467386	ENSRNOG00000022701	Ceacam18	CEA cell adhesion molecule 18 [Source:RGD Symbol;Acc:1563539]
ENSRNOG00000058039	473.429	-0.647588	0.149136	-4.34227	1.41018e-05	8.883e-05	ENSRNOG00000058039	Acta2	actin alpha 2, smooth muscle [Source:RGD Symbol;Acc:621676]
ENSRNOG00000018556	1012.87	-0.186408	0.11109	-1.678	0.0933473	0.169175	ENSRNOG00000018556	Tomm40	translocase of outer mitochondrial membrane 40 [Source:RGD Symbol;Acc:1303022]
ENSRNOG00000042741	61.6158	-0.00934308	0.227259	-0.0411121	0.967207	0.97946	ENSRNOG00000042741	Adgb	androglobin [Source:RGD Symbol;Acc:1564259]
ENSRNOG00000028137	209.639	-0.431084	0.160057	-2.69332	0.00707442	0.01993	ENSRNOG00000028137	Mki67	marker of proliferation Ki-67 [Source:RGD Symbol;Acc:1305476]
ENSRNOG00000051102	108.238	0.166603	0.189266	0.88026	0.378718	0.506216	ENSRNOG00000051102	AABR07004269.3
ENSRNOG00000020296	2830.38	0.121102	0.0666033	1.81825	0.0690257	0.132349	ENSRNOG00000020296	Atp5mk	ATP synthase membrane subunit K [Source:RGD Symbol;Acc:631426]
ENSRNOG00000022640	24.9111	0.0343367	0.337677	0.101685	0.919007	0.945549	ENSRNOG00000022640	Siglec8	sialic acid binding Ig-like lectin 8 [Source:RGD Symbol;Acc:1563073]
ENSRNOG00000029805	289.92	0.276766	0.122514	2.25906	0.0238798	0.0554315	ENSRNOG00000029805	Zfp780b	zinc finger protein 780B [Source:RGD Symbol;Acc:1592570]
ENSRNOG00000017601	837.232	-0.0476338	0.078553	-0.606391	0.544255	0.662033	ENSRNOG00000017601	Srd5a1	steroid 5 alpha-reductase 1 [Source:RGD Symbol;Acc:3757]
ENSRNOG00000016090	1050.36	-0.0944818	0.0562371	-1.68006	0.0929453	0.168651	ENSRNOG00000016090	Mtmr10	myotubularin related protein 10 [Source:RGD Symbol;Acc:1305958]
ENSRNOG00000045560	29.7289	0.873569	0.333832	2.61679	0.00887608	0.0241631	ENSRNOG00000045560	Gvin1	GTPase, very large interferon inducible 1 [Source:RGD Symbol;Acc:1598220]
ENSRNOG00000020651	828.485	-0.0963917	0.0713789	-1.35042	0.17688	0.281877	ENSRNOG00000020651	Cars1	cysteinyl-tRNA synthetase 1 [Source:RGD Symbol;Acc:1310747]
ENSRNOG00000065330	292.645	0.320445	0.134614	2.38047	0.0172904	0.0422868	ENSRNOG00000065330	Mrgpre	MAS related GPR family member E [Source:RGD Symbol;Acc:738045]
ENSRNOG00000016679	408.694	0.141135	0.109777	1.28564	0.198567	0.308896	ENSRNOG00000016679	Tmc7	transmembrane channel-like 7 [Source:RGD Symbol;Acc:1564267]
ENSRNOG00000018350	1186.79	0.316699	0.0626879	5.052	4.37212e-07	4.01934e-06	ENSRNOG00000018350	Shtn1	shootin 1 [Source:RGD Symbol;Acc:1311558]
ENSRNOG00000028992	99.6863	-0.571869	0.227736	-2.5111	0.0120356	0.0312992	ENSRNOG00000028992	Acan	aggrecan [Source:RGD Symbol;Acc:68358]
ENSRNOG00000019838	74.8643	-0.185878	0.225297	-0.825035	0.409352	0.535673	ENSRNOG00000019838	Gmfg	glia maturation factor, gamma [Source:RGD Symbol;Acc:620506]
ENSRNOG00000019549	695.737	0.138406	0.097202	1.4239	0.154475	0.252856	ENSRNOG00000019549	Akap12	A-kinase anchoring protein 12 [Source:RGD Symbol;Acc:70988]
ENSRNOG00000011151	513.627	-0.211826	0.119124	-1.77821	0.0753701	0.142341	ENSRNOG00000011151	Tenm4	teneurin transmembrane protein 4 [Source:RGD Symbol;Acc:1304658]
ENSRNOG00000022189	211.637	0.2884	0.115487	2.49726	0.0125159	0.0323569	ENSRNOG00000022189	Htatip2	HIV-1 Tat interactive protein 2 [Source:RGD Symbol;Acc:1309941]
ENSRNOG00000020762	1416.62	0.177166	0.08509	2.0821	0.0373337	0.0800437	ENSRNOG00000020762	Zfp260	zinc finger protein 260 [Source:RGD Symbol;Acc:621205]
ENSRNOG00000023318	80.223	-0.137287	0.201896	-0.679989	0.496511	0.619004	ENSRNOG00000023318	Tigd3	tigger transposable element derived 3 [Source:RGD Symbol;Acc:1305393]
ENSRNOG00000066701	100.545	0.23113	0.169036	1.36734	0.171518	0.275033	ENSRNOG00000066701	LOC691427	similar to 6.8 kDa mitochondrial proteolipid [Source:RGD Symbol;Acc:1583946]
ENSRNOG00000053075	718.702	-0.193638	0.11187	-1.73092	0.0834666	0.154337	ENSRNOG00000053075	B4galnt4	beta-1,4-N-acetyl-galactosaminyl transferase 4 [Source:RGD Symbol;Acc:1310052]
ENSRNOG00000012874	1726.57	-0.473172	0.0920832	-5.13853	2.76901e-07	2.67212e-06	ENSRNOG00000012874	Rgma	repulsive guidance molecule BMP co-receptor a [Source:RGD Symbol;Acc:1311983]
ENSRNOG00000056069	34.7621	0.181621	0.296508	0.612534	0.540185	0.658512	ENSRNOG00000056069	Kif11	kinesin family member 11 [Source:RGD Symbol;Acc:621258]
ENSRNOG00000065214	250.176	-0.0434228	0.131035	-0.331382	0.740356	0.821165	ENSRNOG00000065214	LOC120097335	high mobility group nucleosome-binding domain-containing protein 5-like [Source:RGD Symbol;Acc:41304028]
ENSRNOG00000011895	221.32	-0.169654	0.122292	-1.38729	0.165355	0.267358	ENSRNOG00000011895	Saal1	serum amyloid A-like 1 [Source:RGD Symbol;Acc:1587443]
ENSRNOG00000017659	52.4952	-0.0772836	0.249672	-0.309541	0.75691	0.833343	ENSRNOG00000017659	Hs3st2	heparan sulfate-glucosamine 3-sulfotransferase 2 [Source:RGD Symbol;Acc:727787]
ENSRNOG00000020777	575.336	0.110976	0.0841231	1.3192	0.187101	0.29446	ENSRNOG00000020777	Zfp382	zinc finger protein 382 [Source:RGD Symbol;Acc:708385]
ENSRNOG00000016266	344.881	-0.0387734	0.101464	-0.382137	0.70236	0.793194	ENSRNOG00000016266	Mphosph10	M-phase phosphoprotein 10 [Source:RGD Symbol;Acc:1307633]
ENSRNOG00000017839	445.29	-0.198197	0.121528	-1.63088	0.102916	0.183425	ENSRNOG00000017839	Ercc1	ERCC excision repair 1, endonuclease non-catalytic subunit [Source:RGD Symbol;Acc:1306992]
ENSRNOG00000017918	365.727	-0.0455699	0.144156	-0.316115	0.751915	0.829677	ENSRNOG00000017918	Iglon5	IgLON family member 5 [Source:RGD Symbol;Acc:1305344]
ENSRNOG00000016381	225.085	0.359206	0.135356	2.65378	0.00795946	0.0220575	ENSRNOG00000016381	Ust	uronyl-2-sulfotransferase [Source:RGD Symbol;Acc:1304743]
ENSRNOG00000020736	218.188	-0.230369	0.150451	-1.53119	0.125723	0.214654	ENSRNOG00000020736	Nadsyn1	NAD synthetase 1 [Source:RGD Symbol;Acc:727801]
ENSRNOG00000023985	309.323	0.0185491	0.111654	0.166131	0.868054	0.913035	ENSRNOG00000023985	Fan1	FANCD2 and FANCI associated nuclease 1 [Source:RGD Symbol;Acc:1566323]
ENSRNOG00000019376	421.285	0.212513	0.0936512	2.2692	0.0232564	0.054225	ENSRNOG00000019376	Zfp329	zinc finger protein 329 [Source:RGD Symbol;Acc:1565029]
ENSRNOG00000017456	254.05	-0.0765721	0.121062	-0.632505	0.527057	0.646782	ENSRNOG00000017456	Vstm2b	V-set and transmembrane domain containing 2B [Source:RGD Symbol;Acc:1306235]
ENSRNOG00000008815	329.77	0.0204824	0.10854	0.188708	0.850322	0.900951	ENSRNOG00000008815	Fbxo46	F-box protein 46 [Source:RGD Symbol;Acc:1308393]
ENSRNOG00000016722	2118.93	-0.0638185	0.0455066	-1.4024	0.160795	0.261485	ENSRNOG00000016722	Xpo6	exportin 6 [Source:RGD Symbol;Acc:1311491]
ENSRNOG00000048397	1312.82	0.0509757	0.0736959	0.691703	0.489124	0.612609	ENSRNOG00000048397	Sephs2	selenophosphate synthetase 2 [Source:RGD Symbol;Acc:1308827]
ENSRNOG00000017728	512.798	0.0269305	0.0902621	0.298359	0.765429	0.839322	ENSRNOG00000017728	Edrf1	erythroid differentiation regulatory factor 1 [Source:RGD Symbol;Acc:1306820]
ENSRNOG00000067450	1158.55	0.139563	0.0615517	2.26741	0.0233654	0.0544276	ENSRNOG00000067450	Zfp146	zinc finger protein 146 [Source:RGD Symbol;Acc:7630088]
ENSRNOG00000015552	842.789	0.29184	0.066867	4.36448	1.27427e-05	8.10546e-05	ENSRNOG00000015552	Ppil4	peptidylprolyl isomerase like 4 [Source:RGD Symbol;Acc:1311051]
ENSRNOG00000016919	1535.42	0.0440878	0.0736547	0.598575	0.549457	0.666338	ENSRNOG00000016919	Scaf8	SR-related CTD-associated factor 8 [Source:RGD Symbol;Acc:708362]
ENSRNOG00000019106	5259.63	-0.226273	0.0507343	-4.45996	8.1976e-06	5.4029e-05	ENSRNOG00000019106	Rps17	40S ribosomal protein S17-like [Source:RGD Symbol;Acc:2318277]
ENSRNOG00000010959	228.684	-0.329779	0.128473	-2.56691	0.0102611	0.0272971	ENSRNOG00000010959	Klhl25	kelch-like family member 25 [Source:RGD Symbol;Acc:1310815]
ENSRNOG00000021474	105.442	-0.0828106	0.245107	-0.337855	0.735473	0.817629	ENSRNOG00000021474	Siglec5	sialic acid binding Ig-like lectin 5 [Source:RGD Symbol;Acc:1305432]
ENSRNOG00000028274	5358.07	-0.305687	0.0802216	-3.81053	0.000138666	0.000663929	ENSRNOG00000028274	Myrf	myelin regulatory factor [Source:RGD Symbol;Acc:1306622]
ENSRNOG00000024410	599.296	-0.124002	0.0862758	-1.43727	0.150641	0.247911	ENSRNOG00000024410	Blvrb	biliverdin reductase B [Source:RGD Symbol;Acc:1306080]
ENSRNOG00000010017	727.715	0.554769	0.0960692	5.77468	7.70973e-09	1.06315e-07	ENSRNOG00000010017	Wee1	WEE1 G2 checkpoint kinase [Source:RGD Symbol;Acc:1307895]
ENSRNOG00000050015	54.423	-0.417805	0.252676	-1.65352	0.0982253	0.176305	ENSRNOG00000050015	Cox7a1	cytochrome c oxidase subunit 7A1 [Source:RGD Symbol;Acc:6496527]
ENSRNOG00000047692	65.2683	0.278777	0.20645	1.35034	0.176907	0.28189	ENSRNOG00000047692	Hells	helicase, lymphoid specific [Source:RGD Symbol;Acc:1309820]
ENSRNOG00000065271	107.365	-0.0162283	0.157368	-0.103124	0.917865	0.944855	ENSRNOG00000065271	Fam174b	family with sequence similarity 174, member B [Source:RGD Symbol;Acc:1596692]
ENSRNOG00000020304	1034.67	-0.274891	0.0957922	-2.86966	0.00410908	0.0125892	ENSRNOG00000020304	Pdcd11	programmed cell death 11 [Source:RGD Symbol;Acc:1304933]
ENSRNOG00000017418	7711.53	-0.0335085	0.0477886	-0.701182	0.48319	0.607359	ENSRNOG00000017418	Rps3	ribosomal protein S3 [Source:RGD Symbol;Acc:619888]
ENSRNOG00000012369	79.6963	0.0883713	0.188212	0.46953	0.638691	0.741296	ENSRNOG00000012369	Fam174b	family with sequence similarity 174, member B [Source:RGD Symbol;Acc:1596692]
ENSRNOG00000014450	871.499	0.303822	0.0782065	3.88488	0.000102382	0.000506576	ENSRNOG00000014450	Shprh	SNF2 histone linker PHD RING helicase [Source:RGD Symbol;Acc:1310342]
ENSRNOG00000067065	3557.57	0.0104784	0.0526447	0.19904	0.842231	0.896126	ENSRNOG00000067065	Capns1	calpain, small subunit 1 [Source:RGD Symbol;Acc:2270]
ENSRNOG00000037298	151.386	0.0710293	0.139054	0.510803	0.609489	0.716101	ENSRNOG00000037298	C1h19orf81	simlar to human chromosome 19 open reading frame 81 [Source:RGD Symbol;Acc:1309036]
ENSRNOG00000016825	158.457	-0.255823	0.161235	-1.58665	0.112592	0.19733	ENSRNOG00000016825	Polr1g	RNA polymerase I subunit G [Source:RGD Symbol;Acc:1591707]
ENSRNOG00000024737	1542.8	-0.00388092	0.0706387	-0.0549404	0.956186	0.97159	ENSRNOG00000024737	Tnrc6a	trinucleotide repeat containing adaptor 6A [Source:RGD Symbol;Acc:1307268]
ENSRNOG00000013624	44.3806	0.368524	0.263949	1.39619	0.162656	0.263994	ENSRNOG00000013624	Uevld	UEV and lactate/malate dehyrogenase domains [Source:RGD Symbol;Acc:1587416]
ENSRNOG00000070456	23.3265	0.971381	0.342807	2.83361	0.00460261	0.0138877	ENSRNOG00000070456	LOC108348146	vomeronasal type-1 receptor 3-like [Source:RGD Symbol;Acc:11394442]
ENSRNOG00000020325	67.7761	-0.189077	0.18736	-1.00916	0.312898	0.440041	ENSRNOG00000020325	Calhm2	calcium homeostasis modulator family member 2 [Source:RGD Symbol;Acc:1308276]
ENSRNOG00000015413	203.555	-0.121291	0.155733	-0.778842	0.436073	0.562417	ENSRNOG00000015413	Qpctl	glutaminyl-peptide cyclotransferase-like [Source:RGD Symbol;Acc:1308128]
ENSRNOG00000016897	1072.95	-0.424606	0.0665037	-6.38469	1.7174e-10	3.34703e-09	ENSRNOG00000016897	Rlbp1	retinaldehyde binding protein 1 [Source:RGD Symbol;Acc:1309649]
ENSRNOG00000037690	49.5673	0.0949102	0.264788	0.358439	0.720015	0.806988	ENSRNOG00000037690	Sertad3	SERTA domain containing 3 [Source:RGD Symbol;Acc:1564271]
ENSRNOG00000014330	5244.75	0.428609	0.0581957	7.36496	1.77194e-13	6.55616e-12	ENSRNOG00000014330	Pcmt1	protein-L-isoaspartate (D-aspartate) O-methyltransferase 1 [Source:RGD Symbol;Acc:3268]
ENSRNOG00000013223	1449.52	-0.316823	0.0805051	-3.93544	8.30447e-05	0.000421512	ENSRNOG00000013223	Fah	fumarylacetoacetate hydrolase [Source:RGD Symbol;Acc:61932]
ENSRNOG00000046112	270.65	-0.195505	0.119461	-1.63656	0.101722	0.181666	ENSRNOG00000046112	Dedd2	death effector domain containing 2 [Source:RGD Symbol;Acc:1588968]
ENSRNOG00000027264	1827.49	-0.136982	0.0746662	-1.8346	0.0665657	0.128457	ENSRNOG00000027264	Dagla	diacylglycerol lipase, alpha [Source:RGD Symbol;Acc:1359461]
ENSRNOG00000032798	1078.8	-0.0843538	0.0880784	-0.957713	0.338208	0.466119	ENSRNOG00000032798	Slco3a1	solute carrier organic anion transporter family, member 3a1 [Source:RGD Symbol;Acc:620227]
ENSRNOG00000019319	1188.83	-0.032957	0.0651525	-0.505845	0.612966	0.718918	ENSRNOG00000019319	Fchsd2	FCH and double SH3 domains 2 [Source:RGD Symbol;Acc:1304812]
ENSRNOG00000018603	1811.01	-0.65384	0.106432	-6.14329	8.08317e-10	1.37553e-08	ENSRNOG00000018603	Carns1	carnosine synthase 1 [Source:RGD Symbol;Acc:1308234]
ENSRNOG00000027422	363.062	0.201221	0.095675	2.10317	0.0354509	0.0768222	ENSRNOG00000027422	Fastkd3	FAST kinase domains 3 [Source:RGD Symbol;Acc:1309729]
ENSRNOG00000020763	5582.95	-0.594001	0.1567	-3.79069	0.00015023	0.000710196	ENSRNOG00000020763	Snrnp70	small nuclear ribonucleoprotein U1 subunit 70 [Source:RGD Symbol;Acc:1307120]
ENSRNOG00000049505	141.243	0.246125	0.131503	1.87164	0.0612564	0.120055	ENSRNOG00000049505	Nup43	nucleoporin 43 [Source:RGD Symbol;Acc:1596513]
ENSRNOG00000059408	1131.45	-0.454715	0.124712	-3.64612	0.000266234	0.00117672	ENSRNOG00000059408	Prr12	proline rich 12 [Source:RGD Symbol;Acc:1309896]
ENSRNOG00000048250	183.392	-0.249915	0.141137	-1.77072	0.0766065	0.144094	ENSRNOG00000048250	Ldaf1	lipid droplet assembly factor 1 [Source:RGD Symbol;Acc:727895]
ENSRNOG00000028891	83.6048	-0.332854	0.190872	-1.74386	0.0811843	0.150882	ENSRNOG00000028891	Cyp2t1	cytochrome P450, family 2, subfamily t, polypeptide 1 [Source:RGD Symbol;Acc:620086]
ENSRNOG00000019959	1386.67	0.0385574	0.0760294	0.507138	0.612058	0.718135	ENSRNOG00000019959	Kcnc3	potassium voltage-gated channel subfamily C member 3 [Source:RGD Symbol;Acc:621358]
ENSRNOG00000020452	808.28	0.0319658	0.0593666	0.538448	0.590268	0.699598	ENSRNOG00000020452	Nsmce4a	NSE4 homolog A, SMC5-SMC6 complex component [Source:RGD Symbol;Acc:1309025]
ENSRNOG00000050224	465.76	0.283606	0.081583	3.47628	0.000508412	0.00206862	ENSRNOG00000050224	Stambpl1	STAM binding protein-like 1 [Source:RGD Symbol;Acc:1583011]
ENSRNOG00000013439	54.0731	0.122029	0.212074	0.575408	0.565015	0.678709	ENSRNOG00000013439	Cpn1	carboxypeptidase N subunit 1 [Source:RGD Symbol;Acc:70931]
ENSRNOG00000014916	842.639	0.470248	0.0866766	5.42532	5.78508e-08	6.53631e-07	ENSRNOG00000014916	Lats1	large tumor suppressor kinase 1 [Source:RGD Symbol;Acc:1564085]
ENSRNOG00000020263	29100.4	0.0285989	0.0734109	0.389573	0.696852	0.788833	ENSRNOG00000020263	Atp1a3	ATPase Na+/K+ transporting subunit alpha 3 [Source:RGD Symbol;Acc:2169]
ENSRNOG00000051197	306.938	0.0946771	0.101917	0.928958	0.352911	0.480404	ENSRNOG00000051197	LOC120097345	60S ribosomal protein L7a [Source:RGD Symbol;Acc:41344265]
ENSRNOG00000020947	1664.32	-0.456086	0.166318	-2.74226	0.00610185	0.0175912	ENSRNOG00000020947	Egln2	egl-9 family hypoxia-inducible factor 2 [Source:RGD Symbol;Acc:631376]
ENSRNOG00000020597	127.156	0.357666	0.134013	2.66888	0.00761051	0.0212045	ENSRNOG00000020597	C1h10orf88	similar to human chromosome 10 open reading frame 88 [Source:RGD Symbol;Acc:1305014]
ENSRNOG00000017826	513.405	0.0820997	0.0791356	1.03746	0.299524	0.426083	ENSRNOG00000017826	Mtrr	5-methyltetrahydrofolate-homocysteine methyltransferase reductase [Source:RGD Symbol;Acc:1308671]
ENSRNOG00000013506	1270.41	0.46973	0.0739856	6.34893	2.16814e-10	4.12333e-09	ENSRNOG00000013506	Zfand6	zinc finger AN1-type containing 6 [Source:RGD Symbol;Acc:1359317]
ENSRNOG00000014277	406.042	0.325406	0.103171	3.15403	0.0016103	0.00565809	ENSRNOG00000014277	Zdhhc13	zinc finger DHHC-type palmitoyltransferase 13 [Source:RGD Symbol;Acc:1309736]
ENSRNOG00000012641	1710.84	0.110949	0.0825994	1.34322	0.179199	0.284715	ENSRNOG00000012641	Sfr1	SWI5-dependent homologous recombination repair protein 1 [Source:RGD Symbol;Acc:1305481]
ENSRNOG00000015675	327.71	0.705895	0.115962	6.08728	1.14845e-09	1.89064e-08	ENSRNOG00000015675	Nell1	neural EGFL like 1 [Source:RGD Symbol;Acc:620998]
ENSRNOG00000050206	2176.61	-0.151724	0.0607622	-2.49702	0.0125243	0.0323731	ENSRNOG00000050206	Shank2	SH3 and multiple ankyrin repeat domains 2 [Source:RGD Symbol;Acc:628772]
ENSRNOG00000012002	601.066	-0.178514	0.0778375	-2.29343	0.0218235	0.0513729	ENSRNOG00000012002	Iqgap1	IQ motif containing GTPase activating protein 1 [Source:RGD Symbol;Acc:1311884]
ENSRNOG00000012788	1184.48	0.0977712	0.0608815	1.60593	0.10829	0.191361	ENSRNOG00000012788	Clns1a	chloride nucleotide-sensitive channel 1A [Source:RGD Symbol;Acc:61884]
ENSRNOG00000019418	3277.14	-0.536232	0.124879	-4.29403	1.75462e-05	0.00010719	ENSRNOG00000019418	Lrrc4b	leucine rich repeat containing 4B [Source:RGD Symbol;Acc:1307121]
ENSRNOG00000042308	34.6901	0.273606	0.26383	1.03705	0.299711	0.426309	ENSRNOG00000042308	Zfp455l1	zinc finger protein 455 like 1 [Source:RGD Symbol;Acc:1594231]
ENSRNOG00000012574	591.601	-0.0481227	0.0718043	-0.670193	0.502735	0.624782	ENSRNOG00000012574	Pum3	pumilio RNA-binding family member 3 [Source:RGD Symbol;Acc:1564753]
ENSRNOG00000047040	44.0695	-0.192215	0.256537	-0.749269	0.453695	0.579743	ENSRNOG00000047040	Lhb	luteinizing hormone subunit beta [Source:RGD Symbol;Acc:3006]
ENSRNOG00000001500	883.005	-0.167014	0.0913046	-1.8292	0.0673698	0.129757	ENSRNOG00000001500	Rab4b	RAB4B, member RAS oncogene family [Source:RGD Symbol;Acc:620931]
ENSRNOG00000016737	68.8673	0.725569	0.214523	3.38224	0.000718978	0.00280461	ENSRNOG00000016737	Tcerg1l	transcription elongation regulator 1-like [Source:RGD Symbol;Acc:1562437]
ENSRNOG00000019413	171.06	-0.139377	0.128691	-1.08303	0.278794	0.40257	ENSRNOG00000019413	Atg16l2	autophagy related 16-like 2 [Source:RGD Symbol;Acc:1311400]
ENSRNOG00000068445	3251.83	-0.767801	0.165014	-4.65293	3.27247e-06	2.40614e-05	ENSRNOG00000068445	Rplp2	ribosomal protein lateral stalk subunit P2 [Source:RGD Symbol;Acc:621775]
ENSRNOG00000015844	629.852	-0.114699	0.08729	-1.31399	0.188848	0.296773	ENSRNOG00000015844	Snrpd2	small nuclear ribonucleoprotein D2 polypeptide [Source:RGD Symbol;Acc:1593018]
ENSRNOG00000068953	357.166	0.13142	0.107984	1.21703	0.223593	0.338663	ENSRNOG00000068953
ENSRNOG00000017963	479.573	0.209583	0.0900678	2.32695	0.0199679	0.0477033	ENSRNOG00000017963	RGD1566325	similar to regulator of sex-limitation candidate 16 [Source:RGD Symbol;Acc:1566325]
ENSRNOG00000019532	1725.38	-0.202486	0.0878031	-2.30613	0.0211032	0.0500158	ENSRNOG00000019532	Emc10	ER membrane protein complex subunit 10 [Source:RGD Symbol;Acc:1303214]
ENSRNOG00000015217	492.559	-0.0520183	0.10398	-0.500272	0.616883	0.721927	ENSRNOG00000015217	Ltv1	LTV1 ribosome biogenesis factor [Source:RGD Symbol;Acc:1311264]
ENSRNOG00000016267	2660.44	0.169051	0.065799	2.5692	0.0101934	0.0271509	ENSRNOG00000016267	Chst15	carbohydrate sulfotransferase 15 [Source:RGD Symbol;Acc:628881]
ENSRNOG00000021510	334.82	-0.104554	0.111303	-0.939362	0.347545	0.47535	ENSRNOG00000021510	Tbc1d10c	TBC1 domain family, member 10C [Source:RGD Symbol;Acc:1311490]
ENSRNOG00000020425	2367.49	-0.0744838	0.0495993	-1.50171	0.133172	0.224654	ENSRNOG00000020425	Stim1	stromal interaction molecule 1 [Source:RGD Symbol;Acc:1306831]
ENSRNOG00000017383	574.499	0.102663	0.0965285	1.06356	0.28753	0.412318	ENSRNOG00000017383	Hikeshi	heat shock protein nuclear import factor hikeshi [Source:RGD Symbol;Acc:1359455]
ENSRNOG00000019161	502.692	0.493597	0.0985422	5.00899	5.4715e-07	4.9181e-06	ENSRNOG00000019161	Cpeb1	cytoplasmic polyadenylation element binding protein 1 [Source:RGD Symbol;Acc:1310421]
ENSRNOG00000047526	377.203	-0.161374	0.0887359	-1.81858	0.0689749	0.132269	ENSRNOG00000047526	Zfp526	zinc finger protein 526 [Source:RGD Symbol;Acc:1588959]
ENSRNOG00000028041	306.862	0.047097	0.145824	0.322971	0.746717	0.826014	ENSRNOG00000028041	Tnnt1	troponin T1, slow skeletal type [Source:RGD Symbol;Acc:621852]
ENSRNOG00000016462	266.734	0.398315	0.114285	3.48529	0.000491603	0.00200614	ENSRNOG00000016462	LOC102547287	zinc finger protein 728-like [Source:RGD Symbol;Acc:7718701]
ENSRNOG00000010664	450.965	-0.201577	0.0935347	-2.15511	0.0311534	0.0690409	ENSRNOG00000010664	Wdr73	WD repeat domain 73 [Source:RGD Symbol;Acc:1306429]
ENSRNOG00000019424	95.9617	-0.634239	0.208076	-3.04812	0.0023028	0.00769212	ENSRNOG00000019424	Aspdh	aspartate dehydrogenase domain containing [Source:RGD Symbol;Acc:1310111]
ENSRNOG00000016790	1288.25	0.202657	0.0665629	3.0446	0.00232989	0.00776699	ENSRNOG00000016790	Kmt5b	lysine methyltransferase 5B [Source:RGD Symbol;Acc:1311637]
ENSRNOG00000039730	599.507	-0.161634	0.0738508	-2.18866	0.0286218	0.0645359	ENSRNOG00000039730	Orai3	ORAI calcium release-activated calcium modulator 3 [Source:RGD Symbol;Acc:1306538]
ENSRNOG00000020949	47.6342	0.117539	0.228245	0.514966	0.606577	0.713496	ENSRNOG00000020949	Hsd17b14	hydroxysteroid (17-beta) dehydrogenase 14 [Source:RGD Symbol;Acc:1588673]
ENSRNOG00000013358	128.299	0.202361	0.14692	1.37735	0.168405	0.270914	ENSRNOG00000013358	Aqp11	aquaporin 11 [Source:RGD Symbol;Acc:628763]
ENSRNOG00000049259	319.465	0.524618	0.0992127	5.28781	1.23787e-07	1.29487e-06	ENSRNOG00000049259	LOC102549842	zinc finger protein 91-like [Source:RGD Symbol;Acc:7600894]
ENSRNOG00000015860	170.092	0.350999	0.175698	1.99774	0.0457452	0.0946696	ENSRNOG00000015860	Gipr	gastric inhibitory polypeptide receptor [Source:RGD Symbol;Acc:2689]
ENSRNOG00000018517	173.985	0.0683902	0.144836	0.472189	0.636792	0.739666	ENSRNOG00000018517	Trim21	tripartite motif-containing 21 [Source:RGD Symbol;Acc:1305795]
ENSRNOG00000050554	35.95	0.180124	0.296897	0.606687	0.544059	0.66194	ENSRNOG00000050554	C1h10orf143	similar to human chromosome 10 open reading frame 143 [Source:RGD Symbol;Acc:2318344]
ENSRNOG00000021206	1478.91	-0.214458	0.0643885	-3.33068	0.000866326	0.0032976	ENSRNOG00000021206	Plaat3	phospholipase A and acyltransferase 3 [Source:RGD Symbol;Acc:2829]
ENSRNOG00000050223	2105.9	-0.271672	0.0672778	-4.03806	5.38956e-05	0.000289171	ENSRNOG00000050223	Rin1	Ras and Rab interactor 1 [Source:RGD Symbol;Acc:620006]
ENSRNOG00000069921	322.153	0.3193	0.0935579	3.41286	0.000642848	0.00254147	ENSRNOG00000069921	Zfp748	zinc finger protein 748 [Source:RGD Symbol;Acc:1594173]
ENSRNOG00000016054	1532.5	0.0422012	0.0648387	0.650865	0.515134	0.635532	ENSRNOG00000016054	Tab2	TGF-beta activated kinase 1/MAP3K7 binding protein 2 [Source:RGD Symbol;Acc:1309527]
ENSRNOG00000020956	252.253	-0.442361	0.123015	-3.59598	0.000323177	0.00139258	ENSRNOG00000020956	Bcat2	branched chain amino acid transaminase 2 [Source:RGD Symbol;Acc:68948]
ENSRNOG00000001501	332.218	-0.225863	0.142556	-1.58438	0.113108	0.198011	ENSRNOG00000001501	Snrpa	small nuclear ribonucleoprotein polypeptide A [Source:RGD Symbol;Acc:1307416]
ENSRNOG00000020417	2634.31	0.0161801	0.0535988	0.301875	0.762747	0.837191	ENSRNOG00000020417	Gsk3a	glycogen synthase kinase 3 alpha [Source:RGD Symbol;Acc:620351]
ENSRNOG00000013877	136.653	-0.604624	0.155126	-3.89764	9.71346e-05	0.000484312	ENSRNOG00000013877	Ttc23	tetratricopeptide repeat domain 23 [Source:RGD Symbol;Acc:1310409]
ENSRNOG00000064721	772.126	0.532885	0.0789904	6.7462	1.51766e-11	3.74357e-10	ENSRNOG00000064721	Rgmb	repulsive guidance molecule BMP co-receptor b [Source:RGD Symbol;Acc:1595392]
ENSRNOG00000018878	504.953	-0.387589	0.130669	-2.96618	0.00301526	0.00967836	ENSRNOG00000018878	Ssh3	slingshot protein phosphatase 3 [Source:RGD Symbol;Acc:1308679]
ENSRNOG00000014852	389.995	0.765405	0.14356	5.33159	9.73559e-08	1.05378e-06	ENSRNOG00000014852	Fbxo30	F-box protein 30 [Source:RGD Symbol;Acc:1359367]
ENSRNOG00000037715	583.967	-0.11939	0.0774861	-1.54079	0.123367	0.21161	ENSRNOG00000037715	Actmap	actin maturation protease [Source:RGD Symbol;Acc:1560854]
ENSRNOG00000020793	670.961	-0.348718	0.102247	-3.41055	0.000648314	0.00256105	ENSRNOG00000020793	Ruvbl2	RuvB-like AAA ATPase 2 [Source:RGD Symbol;Acc:1306509]
ENSRNOG00000047145	353.496	0.359522	0.101865	3.5294	0.000416502	0.00173858	ENSRNOG00000047145	LOC102551340	zinc finger protein 728-like [Source:RGD Symbol;Acc:7697243]
ENSRNOG00000019442	779.697	-0.597329	0.198351	-3.01147	0.00259988	0.00851324	ENSRNOG00000019442	Josd2	Josephin domain containing 2 [Source:RGD Symbol;Acc:1307305]
ENSRNOG00000016935	1886.06	-0.0398451	0.0975589	-0.408421	0.682964	0.777581	ENSRNOG00000016935	Mapk1ip1	mitogen-activated protein kinase 1 interacting protein 1 [Source:RGD Symbol;Acc:1565431]
ENSRNOG00000018531	500.721	-0.114912	0.0994129	-1.15591	0.247719	0.366879	ENSRNOG00000018531	Mrps11	mitochondrial ribosomal protein S11 [Source:RGD Symbol;Acc:1559901]
ENSRNOG00000020426	850.606	-0.429781	0.133304	-3.22406	0.00126387	0.00457331	ENSRNOG00000020426	Erf	Ets2 repressor factor [Source:RGD Symbol;Acc:1311991]
ENSRNOG00000016038	64.2015	0.0859245	0.211325	0.406599	0.684303	0.778717	ENSRNOG00000016038	Mgmt	O-6-methylguanine-DNA methyltransferase [Source:RGD Symbol;Acc:3087]
ENSRNOG00000016611	2517.15	-0.0766277	0.0703452	-1.08931	0.276017	0.399772	ENSRNOG00000016611	Hras	HRas proto-oncogene, GTPase [Source:RGD Symbol;Acc:2827]
ENSRNOG00000056118	3452.38	-0.551842	0.105149	-5.24817	1.53617e-07	1.58145e-06	ENSRNOG00000056118	Cic	capicua transcriptional repressor [Source:RGD Symbol;Acc:1310706]
ENSRNOG00000019127	340.691	0.173582	0.108455	1.60049	0.10949	0.193025	ENSRNOG00000019127	Zfp606	zinc finger protein 606 [Source:RGD Symbol;Acc:1309810]
ENSRNOG00000046353	149.989	0.285556	0.159278	1.79281	0.0730036	0.13866	ENSRNOG00000046353	Zfp273l-ps1	zinc finger protein 273 like, pseudogene 1 [Source:RGD Symbol;Acc:1587241]
ENSRNOG00000023150	12525.3	-0.0446885	0.0498913	-0.895718	0.370403	0.497957	ENSRNOG00000023150	Gpi	glucose-6-phosphate isomerase [Source:RGD Symbol;Acc:2727]
ENSRNOG00000047229	493.224	0.049179	0.0797634	0.616561	0.537524	0.656447	ENSRNOG00000047229	Trim68	tripartite motif containing 68 [Source:RGD Symbol;Acc:1593867]
ENSRNOG00000062741	36.8691	0.575	0.281067	2.04577	0.0407785	0.08612	ENSRNOG00000062741	Ldhal6b	lactate dehydrogenase A-like 6B [Source:RGD Symbol;Acc:727955]
ENSRNOG00000020587	322.638	-0.382998	0.104623	-3.66076	0.000251465	0.00111942	ENSRNOG00000020587	Efemp2	EGF containing fibulin extracellular matrix protein 2 [Source:RGD Symbol;Acc:1359496]
ENSRNOG00000027240	3320.17	-0.357343	0.0769302	-4.64504	3.40014e-06	2.48778e-05	ENSRNOG00000027240	Kndc1	kinase non-catalytic C-lobe domain containing 1 [Source:RGD Symbol;Acc:1565261]
ENSRNOG00000020411	1272.33	-0.0389632	0.058793	-0.662718	0.507511	0.628784	ENSRNOG00000020411	Sec23ip	SEC23 interacting protein [Source:RGD Symbol;Acc:1309328]
ENSRNOG00000063592	90.901	-0.485779	0.223852	-2.17009	0.0300002	0.0669019	ENSRNOG00000063592	Lyve1	lymphatic vessel endothelial hyaluronan receptor 1 [Source:RGD Symbol;Acc:1310864]
ENSRNOG00000016973	122.502	0.0282984	0.161605	0.175108	0.860994	0.908588	ENSRNOG00000016973	Tmem242	transmembrane protein 242 [Source:RGD Symbol;Acc:1307262]
ENSRNOG00000049232	286.45	0.193112	0.111249	1.73586	0.082589	0.153055	ENSRNOG00000049232	Tcf7l2	transcription factor 7 like 2 [Source:RGD Symbol;Acc:1583621]
ENSRNOG00000019318	1020.88	-0.136352	0.106639	-1.27863	0.201026	0.312007	ENSRNOG00000019318	Syt3	synaptotagmin 3 [Source:RGD Symbol;Acc:3805]
ENSRNOG00000018547	455.987	0.0116807	0.0780688	0.14962	0.881064	0.92144	ENSRNOG00000018547	Mrpl46	mitochondrial ribosomal protein L46 [Source:RGD Symbol;Acc:1309123]
ENSRNOG00000042592	1622.33	-0.206525	0.0780249	-2.64691	0.0081231	0.0223988	ENSRNOG00000042592	Rgs10	regulator of G-protein signaling 10 [Source:RGD Symbol;Acc:3562]
ENSRNOG00000064244	36.4351	0.256994	0.252925	1.01609	0.309588	0.436784	ENSRNOG00000064244	LOC102552823	zinc finger protein 709-like [Source:RGD Symbol;Acc:7716102]
ENSRNOG00000020481	104.467	0.21647	0.200401	1.08019	0.280059	0.403995	ENSRNOG00000020481	Pafah1b3	platelet-activating factor acetylhydrolase 1b, catalytic subunit 3 [Source:RGD Symbol;Acc:620333]
ENSRNOG00000018606	33.29	-0.0324498	0.300884	-0.107848	0.914116	0.942684	ENSRNOG00000018606	Olr59	olfactory receptor 59 [Source:RGD Symbol;Acc:628858]
ENSRNOG00000018664	57.6964	0.581793	0.288108	2.01936	0.0434499	0.0908377	ENSRNOG00000018664	Klk7	kallikrein-related peptidase 7 [Source:RGD Symbol;Acc:1306420]
ENSRNOG00000019501	774.661	0.128311	0.0695211	1.84564	0.0649446	0.125962	ENSRNOG00000019501	Rmnd1	required for meiotic nuclear division 1 homolog [Source:RGD Symbol;Acc:1309546]
ENSRNOG00000017897	85.5168	-0.310307	0.27057	-1.14686	0.251438	0.37121	ENSRNOG00000017897	Adam8	ADAM metallopeptidase domain 8 [Source:RGD Symbol;Acc:1566394]
ENSRNOG00000016791	1142.6	-0.192269	0.0776589	-2.47582	0.0132931	0.0340482	ENSRNOG00000016791	Chka	choline kinase alpha [Source:RGD Symbol;Acc:61944]
ENSRNOG00000021058	287.175	-0.231861	0.105373	-2.20037	0.0277807	0.0629843	ENSRNOG00000021058	Grwd1	glutamate-rich WD repeat containing 1 [Source:RGD Symbol;Acc:1310649]
ENSRNOG00000012692	418.795	0.11783	0.0798864	1.47497	0.14022	0.234479	ENSRNOG00000012692	Riok2	RIO kinase 2 [Source:RGD Symbol;Acc:1311588]
ENSRNOG00000013351	762.81	-0.0532647	0.0754222	-0.706221	0.480051	0.604583	ENSRNOG00000013351	Stxbp5	syntaxin binding protein 5 [Source:RGD Symbol;Acc:708517]
ENSRNOG00000017509	413.854	0.153423	0.0856237	1.79182	0.0731611	0.138889	ENSRNOG00000017509	Eed	embryonic ectoderm development [Source:RGD Symbol;Acc:1309782]
ENSRNOG00000018515	94.6994	0.205482	0.17265	1.19016	0.233982	0.350644	ENSRNOG00000018515	Det1	DET1 partner of COP1 E3 ubiquitin ligase [Source:RGD Symbol;Acc:1309793]
ENSRNOG00000031927	1624.04	-0.168801	0.101067	-1.67019	0.0948826	0.171417	ENSRNOG00000031927	Klk6	kallikrein related-peptidase 6 [Source:RGD Symbol;Acc:3419]
ENSRNOG00000022164	100.735	-0.105362	0.154045	-0.683966	0.493996	0.616662	ENSRNOG00000022164	Zscan2	zinc finger and SCAN domain containing 2 [Source:RGD Symbol;Acc:1584548]
ENSRNOG00000021063	172.678	-0.0926448	0.169238	-0.547424	0.584087	0.694254	ENSRNOG00000021063	Grin2d	glutamate ionotropic receptor NMDA type subunit 2D [Source:RGD Symbol;Acc:2740]
ENSRNOG00000013407	380.527	-0.109325	0.106121	-1.03019	0.302922	0.429806	ENSRNOG00000013407	Slc5a11	solute carrier family 5 member 11 [Source:RGD Symbol;Acc:621410]
ENSRNOG00000039076	195.536	-0.39591	0.134773	-2.93761	0.00330753	0.0104814	ENSRNOG00000039076	Spaca6	sperm acrosome associated 6 [Source:RGD Symbol;Acc:1588836]
ENSRNOG00000019489	675.03	0.274347	0.075592	3.62931	0.000284182	0.0012461	ENSRNOG00000019489	Armt1	acidic residue methyltransferase 1 [Source:RGD Symbol;Acc:1305235]
ENSRNOG00000031739	109.177	-0.711288	0.165243	-4.3045	1.6736e-05	0.000103017	ENSRNOG00000031739	Garin5a	golgi associated RAB2 interactor 5A [Source:RGD Symbol;Acc:1311142]
ENSRNOG00000020235	6189.81	0.00929467	0.0397732	0.233692	0.815224	0.876689	ENSRNOG00000020235	Hnrnpl	heterogeneous nuclear ribonucleoprotein L [Source:RGD Symbol;Acc:71059]
ENSRNOG00000021130	487.84	-0.284566	0.125228	-2.27239	0.0230632	0.0538587	ENSRNOG00000021130	Abcc8	ATP binding cassette subfamily C member 8 [Source:RGD Symbol;Acc:3786]
ENSRNOG00000014925	40.3588	0.0495195	0.264545	0.187188	0.851514	0.901606	ENSRNOG00000014925	Mesp2	mesoderm posterior bHLH transcription factor 2 [Source:RGD Symbol;Acc:1305959]
ENSRNOG00000021017	5836.08	-0.360014	0.122769	-2.93246	0.00336292	0.0106187	ENSRNOG00000021017	Car11	carbonic anhydrase 11 [Source:RGD Symbol;Acc:735155]
ENSRNOG00000012988	2129.16	-0.366409	0.0756124	-4.84588	1.26049e-06	1.03697e-05	ENSRNOG00000012988	Lix1	limb and CNS expressed 1 [Source:RGD Symbol;Acc:1309454]
ENSRNOG00000021027	4723.33	-0.253868	0.0865998	-2.93151	0.00337315	0.0106471	ENSRNOG00000021027	Dbp	D-box binding PAR bZIP transcription factor [Source:RGD Symbol;Acc:2491]
ENSRNOG00000042686	186.669	-0.243901	0.11861	-2.05632	0.0397512	0.0843218	ENSRNOG00000042686	Trim34	tripartite motif-containing 34 [Source:RGD Symbol;Acc:7240857]
ENSRNOG00000009922	23.6713	0.181555	0.359737	0.50469	0.613777	0.719484	ENSRNOG00000009922	Prlhr	prolactin releasing hormone receptor [Source:RGD Symbol;Acc:71037]
ENSRNOG00000014610	145.203	-0.753285	0.160379	-4.69691	2.64126e-06	1.99603e-05	ENSRNOG00000014610	Anpep	alanyl aminopeptidase, membrane [Source:RGD Symbol;Acc:2991]
ENSRNOG00000020882	307.593	-0.469491	0.124264	-3.77816	0.000157993	0.00074407	ENSRNOG00000020882	Shkbp1	Sh3kbp1 binding protein 1 [Source:RGD Symbol;Acc:1309281]
ENSRNOG00000067926	2933.45	0.296855	0.059834	4.9613	7.0022e-07	6.14615e-06	ENSRNOG00000067926
ENSRNOG00000019627	129.655	-0.331936	0.179628	-1.84791	0.064615	0.125421	ENSRNOG00000019627	Mybpc2	myosin binding protein C2 [Source:RGD Symbol;Acc:1311596]
ENSRNOG00000016940	1015.3	0.196917	0.0766373	2.56946	0.0101856	0.0271349	ENSRNOG00000016940	Ppp2r2d	protein phosphatase 2, regulatory subunit B, delta [Source:RGD Symbol;Acc:708356]
ENSRNOG00000015488	57.4284	-0.637908	0.236978	-2.69185	0.00710567	0.0200067	ENSRNOG00000015488	Tead1	TEA domain transcription factor 1 [Source:RGD Symbol;Acc:1549742]
ENSRNOG00000015609	307.363	0.135909	0.102878	1.32107	0.186478	0.293604	ENSRNOG00000015609	Wdr27	WD repeat domain 27 [Source:RGD Symbol;Acc:1309633]
ENSRNOG00000030776	2303.34	-0.0628018	0.0566587	-1.10842	0.267679	0.390329	ENSRNOG00000030776	Sytl2	synaptotagmin-like 2 [Source:RGD Symbol;Acc:1307647]
ENSRNOG00000020308	1498.09	-0.225079	0.0620137	-3.6295	0.000283968	0.00124553	ENSRNOG00000020308	Ech1	enoyl-CoA hydratase 1 [Source:RGD Symbol;Acc:69353]
ENSRNOG00000021032	611.947	-0.496049	0.0900427	-5.50904	3.60797e-08	4.21672e-07	ENSRNOG00000021032	Sphk2	sphingosine kinase 2 [Source:RGD Symbol;Acc:1307757]
ENSRNOG00000017191	425.838	-0.0579638	0.0932337	-0.621705	0.534136	0.653537	ENSRNOG00000017191	Trim5	tripartite motif-containing 5 [Source:RGD Symbol;Acc:1304579]
ENSRNOG00000070392	490.271	0.56859	0.0881746	6.44845	1.12997e-10	2.29806e-09	ENSRNOG00000070392	Spty2d1	SPT2 chromatin protein domain containing 1 [Source:RGD Symbol;Acc:2319415]
ENSRNOG00000018369	53.8359	-1.24528	0.213434	-5.8345	5.39534e-09	7.6736e-08	ENSRNOG00000018369	Prx	periaxin [Source:RGD Symbol;Acc:619960]
ENSRNOG00000025587	34.1096	1.4322	0.480679	2.97953	0.0028869	0.00932608	ENSRNOG00000025587	Plagl1	PLAG1 like zinc finger 1 [Source:RGD Symbol;Acc:3014]
ENSRNOG00000023053	1369.81	0.0643081	0.063574	1.01155	0.311755	0.438846	ENSRNOG00000023053	Ice1	interactor of little elongation complex ELL subunit 1 [Source:RGD Symbol;Acc:1309747]
ENSRNOG00000033498	403.092	-0.292661	0.0874018	-3.34846	0.000812615	0.00312261	ENSRNOG00000033498	Cib1	calcium and integrin binding 1 [Source:RGD Symbol;Acc:620133]
ENSRNOG00000070184	106.112	0.173415	0.167548	1.03501	0.300662	0.427336	ENSRNOG00000070184	LOC100125364	RIKEN cDNA 1600012H06 gene [Source:MGI Symbol;Acc:MGI:1915162]
ENSRNOG00000065015	94.0511	0.099211	0.166558	0.595656	0.551405	0.667834	ENSRNOG00000065015
ENSRNOG00000012460	165.155	-0.10065	0.139889	-0.719503	0.471831	0.596544	ENSRNOG00000012460	Cntf	ciliary neurotrophic factor [Source:RGD Symbol;Acc:2370]
ENSRNOG00000026163	1404.76	-0.291074	0.0823398	-3.53503	0.000407723	0.00170527	ENSRNOG00000026163	Cpt1c	carnitine palmitoyltransferase 1c [Source:RGD Symbol;Acc:1305384]
ENSRNOG00000040242	190.408	0.0276585	0.124685	0.221826	0.824449	0.883558	ENSRNOG00000040242	Epm2a	EPM2A glucan phosphatase, laforin [Source:RGD Symbol;Acc:71047]
ENSRNOG00000021035	3053.02	-0.297045	0.0683773	-4.34421	1.3978e-05	8.80876e-05	ENSRNOG00000021035	Rpl18	ribosomal protein L18 [Source:RGD Symbol;Acc:621182]
ENSRNOG00000020675	901.781	-0.114951	0.0931873	-1.23354	0.217373	0.330919	ENSRNOG00000020675	Ccdc97	coiled-coil domain containing 97 [Source:RGD Symbol;Acc:1309393]
ENSRNOG00000012036	94.1504	-0.0645037	0.177047	-0.36433	0.715612	0.803628	ENSRNOG00000012036	Pcsk5	proprotein convertase subtilisin/kexin type 5 [Source:RGD Symbol;Acc:620326]
ENSRNOG00000015551	537.807	0.046581	0.0749517	0.621481	0.534283	0.65361	ENSRNOG00000015551	Fuca2	alpha-L-fucosidase 2 [Source:RGD Symbol;Acc:1303053]
ENSRNOG00000020683	2549.56	-0.128704	0.0488026	-2.63725	0.0083582	0.0229373	ENSRNOG00000020683	Hnrnpul1	heterogeneous nuclear ribonucleoprotein U-like 1 [Source:RGD Symbol;Acc:1307456]
ENSRNOG00000019283	175.012	-0.212553	0.137361	-1.5474	0.121767	0.209563	ENSRNOG00000019283	P2ry2	purinergic receptor P2Y2 [Source:RGD Symbol;Acc:62088]
ENSRNOG00000055650	76.1377	-0.540418	0.212019	-2.54892	0.0108058	0.0285712	ENSRNOG00000055650	Pou2f2	POU class 2 homeobox 2 [Source:RGD Symbol;Acc:621690]
ENSRNOG00000064293	383.241	0.245327	0.0991233	2.47497	0.0133246	0.0341056	ENSRNOG00000064293	Gdpgp1	GDP-D-glucose phosphorylase 1 [Source:RGD Symbol;Acc:1560277]
ENSRNOG00000014434	677.705	0.12056	0.100273	1.20231	0.229244	0.345438	ENSRNOG00000014434	Chd1	chromodomain helicase DNA binding protein 1 [Source:RGD Symbol;Acc:1306794]
ENSRNOG00000014290	1274.52	0.559288	0.0627161	8.91776	4.75801e-19	4.93908e-17	ENSRNOG00000014290	Grm1	glutamate metabotropic receptor 1 [Source:RGD Symbol;Acc:2742]
ENSRNOG00000020812	710.239	-0.257471	0.0674356	-3.81803	0.000134519	0.000646972	ENSRNOG00000020812	Gys1	glycogen synthase 1 [Source:RGD Symbol;Acc:1589798]
ENSRNOG00000020546	346.048	-0.638881	0.161923	-3.94559	7.96048e-05	0.000407372	ENSRNOG00000020546	Lipe	lipase E, hormone sensitive type [Source:RGD Symbol;Acc:3010]
ENSRNOG00000012524	3593.3	0.116682	0.0681196	1.71291	0.0867298	0.15915	ENSRNOG00000012524	Zfp91	zinc finger protein 91 [Source:RGD Symbol;Acc:628736]
ENSRNOG00000042777	258.813	0.0391499	0.106487	0.36765	0.713134	0.801921	ENSRNOG00000042777	Zfp78	zinc finger protein 28 [Source:RGD Symbol;Acc:7679103]
ENSRNOG00000012103	22.5728	0.630068	0.403627	1.56102	0.11852	0.205454	ENSRNOG00000012103	Nmbr	neuromedin B receptor [Source:RGD Symbol;Acc:3181]
ENSRNOG00000019728	642.757	0.00570873	0.105153	0.0542899	0.956704	0.972051	ENSRNOG00000019728	Itgad	integrin subunit alpha M [Source:RGD Symbol;Acc:2926]
ENSRNOG00000046874	369.838	-0.133106	0.104946	-1.26833	0.20468	0.316078	ENSRNOG00000046874	Snx9	sorting nexin 9 [Source:RGD Symbol;Acc:1584466]
ENSRNOG00000027405	4287.83	0.431796	0.0966638	4.46699	7.93273e-06	5.24451e-05	ENSRNOG00000027405	Ccp110	centriolar coiled-coil protein 110 [Source:RGD Symbol;Acc:1310509]
ENSRNOG00000026109	1766.36	0.0294612	0.0531502	0.554302	0.579372	0.690682	ENSRNOG00000026109	Prmt1	protein arginine methyltransferase 1 [Source:RGD Symbol;Acc:62020]
ENSRNOG00000021046	39.2535	0.271229	0.292877	0.926083	0.354403	0.481864	ENSRNOG00000021046	Sult2b1	sulfotransferase family 2B member 1 [Source:RGD Symbol;Acc:1308882]
ENSRNOG00000015660	576.422	0.161134	0.0821813	1.96071	0.0499131	0.101497	ENSRNOG00000015660	Pex3	peroxisomal biogenesis factor 3 [Source:RGD Symbol;Acc:621636]
ENSRNOG00000017854	729.306	-0.502535	0.116921	-4.29808	1.72281e-05	0.000105717	ENSRNOG00000017854	Ucp2	uncoupling protein 2 [Source:RGD Symbol;Acc:3932]
ENSRNOG00000001488	2906.28	0.0771331	0.0444392	1.7357	0.0826174	0.153088	ENSRNOG00000001488	Psmb1	proteasome 20S subunit beta 1 [Source:RGD Symbol;Acc:621092]
ENSRNOG00000020713	430.578	-0.275243	0.110922	-2.48141	0.0130863	0.033599	ENSRNOG00000020713	Osbpl5	oxysterol binding protein-like 5 [Source:RGD Symbol;Acc:1308402]
ENSRNOG00000067308	56.4559	0.00435594	0.22999	0.0189397	0.984889	0.990509	ENSRNOG00000067308
ENSRNOG00000064385	11403.2	-0.495352	0.113358	-4.36981	1.24356e-05	7.92361e-05	ENSRNOG00000064385	Ftl1	ferritin light chain 1 [Source:RGD Symbol;Acc:61813]
ENSRNOG00000046983	117.003	0.15432	0.168209	0.917432	0.358916	0.486629	ENSRNOG00000046983	Adat2	adenosine deaminase, tRNA-specific 2 [Source:RGD Symbol;Acc:1309642]
ENSRNOG00000012611	160.281	0.107976	0.137134	0.787379	0.43106	0.557202	ENSRNOG00000012611	Lpxn	leupaxin [Source:RGD Symbol;Acc:1304981]
ENSRNOG00000018773	190.757	0.119265	0.119001	1.00222	0.316238	0.44357	ENSRNOG00000018773	Mtrf1l	mitochondrial translation release factor 1 like [Source:RGD Symbol;Acc:1598312]
ENSRNOG00000017508	658.202	-0.560102	0.15341	-3.65101	0.000261206	0.00115861	ENSRNOG00000017508	Kmt5c	lysine methyltransferase 5C [Source:RGD Symbol;Acc:1305226]
ENSRNOG00000010853	68.1138	0.742771	0.23096	3.21602	0.00129983	0.00468529	ENSRNOG00000010853	Chrna7	cholinergic receptor nicotinic alpha 7 subunit [Source:RGD Symbol;Acc:2348]
ENSRNOG00000019555	962.291	-0.699367	0.0778748	-8.98066	2.6915e-19	2.95828e-17	ENSRNOG00000019555	Arap1	ArfGAP with RhoGAP domain, ankyrin repeat and PH domain 1 [Source:RGD Symbol;Acc:1310385]
ENSRNOG00000020876	525.114	-0.179868	0.0903033	-1.99182	0.0463905	0.0956344	ENSRNOG00000020876	Bax	BCL2 associated X, apoptosis regulator [Source:RGD Symbol;Acc:2192]
ENSRNOG00000034184	106.189	0.253587	0.150935	1.68011	0.0929357	0.168651	ENSRNOG00000034184	Zfp583	zinc finger protein 583 [Source:RGD Symbol;Acc:1562044]
ENSRNOG00000020233	2569.66	-0.0654741	0.0827695	-0.791041	0.42892	0.555222	ENSRNOG00000020233	Rabac1	Rab acceptor 1 [Source:RGD Symbol;Acc:621002]
ENSRNOG00000020883	189.273	0.0713907	0.127138	0.561523	0.574441	0.686367	ENSRNOG00000020883	Dhdh	dihydrodiol dehydrogenase [Source:RGD Symbol;Acc:1588686]
ENSRNOG00000001489	267.318	0.341255	0.112545	3.03217	0.00242799	0.00802956	ENSRNOG00000001489	Tbp	TATA box binding protein [Source:RGD Symbol;Acc:67398]
ENSRNOG00000024414	975.321	0.509046	0.0943831	5.3934	6.91368e-08	7.74125e-07	ENSRNOG00000024414	Ate1	arginyltransferase 1 [Source:RGD Symbol;Acc:1309335]
ENSRNOG00000046971	31.6975	-0.29263	0.366888	-0.797599	0.425103	0.551553	ENSRNOG00000046971	Ccer2	coiled-coil glutamate-rich protein 2 [Source:RGD Symbol;Acc:6502457]
ENSRNOG00000033906	447.473	0.348415	0.0995058	3.50145	0.000462726	0.00190546	ENSRNOG00000033906	Zfp667	zinc finger protein 667 [Source:RGD Symbol;Acc:1359114]
ENSRNOG00000027784	60.9004	-0.206394	0.250116	-0.825192	0.409262	0.53565	ENSRNOG00000027784	Tsku	tsukushi, small leucine rich proteoglycan [Source:RGD Symbol;Acc:1359311]
ENSRNOG00000021048	2392.43	-0.732685	0.213234	-3.43607	0.000590227	0.00236028	ENSRNOG00000021048	Lmtk3	lemur tyrosine kinase 3 [Source:RGD Symbol;Acc:1588641]
ENSRNOG00000018690	344.439	1.02047	0.126524	8.06546	7.29633e-16	4.21102e-14	ENSRNOG00000018690	Rgs17	regulator of G-protein signaling 17 [Source:RGD Symbol;Acc:1305515]
ENSRNOG00000011540	1548.57	-0.00704313	0.0538688	-0.130746	0.895976	0.931121	ENSRNOG00000011540	Vta1	vesicle trafficking 1 [Source:RGD Symbol;Acc:1305031]
ENSRNOG00000020927	46.4817	-0.236485	0.224675	-1.05257	0.29254	0.418058	ENSRNOG00000020927	Tulp2	TUB like protein 2 [Source:RGD Symbol;Acc:1310551]
ENSRNOG00000020063	244.807	-0.175957	0.149991	-1.17311	0.24075	0.358261	ENSRNOG00000020063	Nfkbib	NFKB inhibitor beta [Source:RGD Symbol;Acc:621887]
ENSRNOG00000017678	384.443	0.071622	0.0977994	0.732336	0.463963	0.589187	ENSRNOG00000017678	Ap2b1-ps1	adaptor related protein complex 2 subunit beta 1, pseudogene 1 [Source:RGD Symbol;Acc:1595515]
ENSRNOG00000011476	355.044	0.0238851	0.103954	0.229765	0.818274	0.878831	ENSRNOG00000011476	Nars2	asparaginyl-tRNA synthetase 2, mitochondrial [Source:RGD Symbol;Acc:1305145]
ENSRNOG00000024460	617.441	0.0884229	0.0794126	1.11346	0.26551	0.387922	ENSRNOG00000024460	Tars3	threonyl-tRNA synthetase 3 [Source:RGD Symbol;Acc:1311308]
ENSRNOG00000020982	5819.18	-0.58144	0.121814	-4.77319	1.8133e-06	1.43177e-05	ENSRNOG00000020982	Fau	similar to Finkel-Biskis-Reilly murine sarcoma virusubiquitously expressed [Source:RGD Symbol;Acc:1597505]
ENSRNOG00000001490	239.582	0.100054	0.0994169	1.00641	0.314221	0.441528	ENSRNOG00000001490	Pdcd2	programmed cell death 2 [Source:RGD Symbol;Acc:61887]
ENSRNOG00000011480	804.64	0.345609	0.0766201	4.51069	6.46173e-06	4.36861e-05	ENSRNOG00000011480	Tubgcp5	tubulin, gamma complex associated protein 5 [Source:RGD Symbol;Acc:1304689]
ENSRNOG00000020578	110.754	0.146976	0.16908	0.869269	0.3847	0.511884	ENSRNOG00000020578	Ceacam1	CEA cell adhesion molecule 1 [Source:RGD Symbol;Acc:67396]
ENSRNOG00000012872	120.419	0.0259822	0.18896	0.137501	0.890635	0.927491	ENSRNOG00000012872	Carnmt1	carnosine N-methyltransferase 1 [Source:RGD Symbol;Acc:1311863]
ENSRNOG00000010087	260.244	0.179454	0.0951505	1.886	0.0592943	0.116987	ENSRNOG00000010087	Zfp143	zinc finger protein 143 [Source:RGD Symbol;Acc:1305662]
ENSRNOG00000021493	54.9686	-0.370269	0.206816	-1.79033	0.0734016	0.139292	ENSRNOG00000021493	Prdm9	PR/SET domain 9 [Source:RGD Symbol;Acc:1305247]
ENSRNOG00000020889	5671.45	0.0635491	0.0653133	0.97299	0.330558	0.458196	ENSRNOG00000020889	Nucb1	nucleobindin 1 [Source:RGD Symbol;Acc:620030]
ENSRNOG00000020695	33.5988	-0.67861	0.277445	-2.44592	0.0144482	0.0364693	ENSRNOG00000020695	Tead2	TEA domain transcription factor 2 [Source:RGD Symbol;Acc:1593252]
ENSRNOG00000047575	254.446	-0.618024	0.143057	-4.32011	1.55948e-05	9.68472e-05	ENSRNOG00000047575	Dhx34	DExH-box helicase 34 [Source:RGD Symbol;Acc:1584452]
ENSRNOG00000061450	109.053	-0.353399	0.173631	-2.03534	0.0418167	0.0880265	ENSRNOG00000061450	Homer2	homer scaffold protein 2 [Source:RGD Symbol;Acc:620705]
ENSRNOG00000020102	6722.81	-0.47793	0.0683882	-6.98849	2.77857e-12	8.01815e-11	ENSRNOG00000020102	Sirt2	sirtuin 2 [Source:RGD Symbol;Acc:621481]
ENSRNOG00000017429	39.8841	-0.462843	0.348658	-1.3275	0.184343	0.291101	ENSRNOG00000017429	Lat	linker for activation of T cells [Source:RGD Symbol;Acc:620802]
ENSRNOG00000010753	1151.16	0.194491	0.0599739	3.24293	0.00118307	0.0043228	ENSRNOG00000010753	Aig1	androgen-induced 1 [Source:RGD Symbol;Acc:1562920]
ENSRNOG00000020605	416.249	-0.0525104	0.0906395	-0.579332	0.562365	0.676558	ENSRNOG00000020605	Pstk	phosphoseryl-tRNA kinase [Source:RGD Symbol;Acc:1564300]
ENSRNOG00000012576	877.888	0.070926	0.0674602	1.05138	0.293086	0.418478	ENSRNOG00000012576	Selenos	selenoprotein S [Source:RGD Symbol;Acc:628897]
ENSRNOG00000015517	345.636	-0.398289	0.110579	-3.60184	0.000315977	0.00136786	ENSRNOG00000015517	Zfp444	zinc finger protein 444 [Source:RGD Symbol;Acc:1304847]
ENSRNOG00000017030	1656.52	0.0190601	0.0661952	0.287938	0.773394	0.845283	ENSRNOG00000017030	Arid1b	AT-rich interaction domain 1B [Source:RGD Symbol;Acc:708504]
ENSRNOG00000025644	370.576	0.422859	0.109018	3.87882	0.000104964	0.000517822	ENSRNOG00000025644	C1h9orf40	similar to human chromosome 9 open reading frame 40 [Source:RGD Symbol;Acc:1563237]
ENSRNOG00000013663	269.093	-0.142794	0.121919	-1.17122	0.241509	0.359104	ENSRNOG00000013663	Tmem86a	transmembrane protein 86A [Source:RGD Symbol;Acc:1305749]
ENSRNOG00000014166	87.0682	-0.160959	0.277169	-0.580727	0.561425	0.675698	ENSRNOG00000014166	Smoc2	SPARC related modular calcium binding 2 [Source:RGD Symbol;Acc:1306681]
ENSRNOG00000047035	179.643	-0.0556368	0.141873	-0.392158	0.694941	0.787087	ENSRNOG00000047035	Fadd	Fas associated via death domain [Source:RGD Symbol;Acc:628700]
ENSRNOG00000015658	4092.58	0.10452	0.0702671	1.48747	0.136891	0.229863	ENSRNOG00000015658	Sorbs1	sorbin and SH3 domain containing 1 [Source:RGD Symbol;Acc:1586598]
ENSRNOG00000024580	56.3188	-0.529781	0.213904	-2.47672	0.0132594	0.0339852	ENSRNOG00000024580	Mamstr	MEF2 activating motif and SAP domain containing transcriptional regulator [Source:RGD Symbol;Acc:1588652]
ENSRNOG00000014791	9378.42	0.566952	0.0727037	7.79811	6.28405e-15	3.0798e-13	ENSRNOG00000014791	Peg3	paternally expressed 3 [Source:RGD Symbol;Acc:2323590]
ENSRNOG00000019249	2541.04	-0.0809247	0.0599774	-1.34925	0.177256	0.282246	ENSRNOG00000019249	Ap3b2	adaptor related protein complex 3 subunit beta 2 [Source:RGD Symbol;Acc:1308950]
ENSRNOG00000011290	566.081	0.168021	0.0978101	1.71783	0.0858283	0.157787	ENSRNOG00000011290	Tm2d3	TM2 domain containing 3 [Source:RGD Symbol;Acc:1564929]
ENSRNOG00000019485	1414.03	-0.0829664	0.0587432	-1.41236	0.157845	0.257555	ENSRNOG00000019485	Bckdk	lysine acetyltransferase 8 [Source:RGD Symbol;Acc:1311512]
ENSRNOG00000015822	1234.39	-0.261914	0.0792368	-3.30546	0.000948193	0.00356568	ENSRNOG00000015822	Klf13	KLF transcription factor 13 [Source:RGD Symbol;Acc:1565099]
ENSRNOG00000015456	180.848	-0.250022	0.158486	-1.57756	0.114666	0.200261	ENSRNOG00000015456	Zfp787	zinc finger protein 787 [Source:RGD Symbol;Acc:1310536]
ENSRNOG00000020310	3428.15	-0.674839	0.111472	-6.0539	1.41377e-09	2.28961e-08	ENSRNOG00000020310	Grik5	glutamate ionotropic receptor kainate type subunit 5 [Source:RGD Symbol;Acc:2735]
ENSRNOG00000020669	113.931	0.0568345	0.192135	0.295804	0.76738	0.84072	ENSRNOG00000020669	Ovol1	ovo like transcriptional repressor 1 [Source:RGD Symbol;Acc:1306956]
ENSRNOG00000020699	175.648	-0.268859	0.172756	-1.55629	0.119638	0.207057	ENSRNOG00000020699	Cd37	CD37 molecule [Source:RGD Symbol;Acc:62035]
ENSRNOG00000021507	1525.84	0.367292	0.108012	3.40047	0.000672696	0.00264617	ENSRNOG00000021507	Luzp2	leucine zipper protein 2 [Source:RGD Symbol;Acc:6496163]
ENSRNOG00000006962	4361.47	-0.00184022	0.0774863	-0.0237489	0.981053	0.988526	ENSRNOG00000006962	Stk32c	serine/threonine kinase 32C [Source:RGD Symbol;Acc:1305864]
ENSRNOG00000018012	1817.58	0.106856	0.101561	1.05214	0.292736	0.418179	ENSRNOG00000018012	Tulp4	TUB like protein 4 [Source:RGD Symbol;Acc:1564487]
ENSRNOG00000069456	89.1146	0.0349111	0.197822	0.176477	0.859919	0.907709	ENSRNOG00000069456
ENSRNOG00000015180	408.937	-0.0588972	0.0795831	-0.740072	0.459256	0.584551	ENSRNOG00000015180	Kdm8	lysine demethylase 8 [Source:RGD Symbol;Acc:1304823]
ENSRNOG00000013123	74.9997	-0.531734	0.232151	-2.29046	0.0219945	0.0517184	ENSRNOG00000013123	Scube2	signal peptide, CUB domain and EGF like domain containing 2 [Source:RGD Symbol;Acc:1563998]
ENSRNOG00000020164	231.768	0.0930564	0.145649	0.638908	0.522883	0.643032	ENSRNOG00000020164	Ifitm10	interferon induced transmembrane protein 10 [Source:RGD Symbol;Acc:1563319]
ENSRNOG00000025354	45.2216	0.140819	0.229889	0.612552	0.540172	0.658512	ENSRNOG00000025354	Rinl	Ras and Rab interactor-like [Source:RGD Symbol;Acc:1310133]
ENSRNOG00000031662	51.1592	0.774824	0.23637	3.27801	0.00104541	0.00388243	ENSRNOG00000031662	Slc6a5	solute carrier family 6 member 5 [Source:RGD Symbol;Acc:621824]
ENSRNOG00000026861	436.164	0.341481	0.0920487	3.70979	0.000207432	0.000947837	ENSRNOG00000026861	Zscan18	zinc finger and SCAN domain containing 18 [Source:RGD Symbol;Acc:1560671]
ENSRNOG00000014465	25.6554	0.844648	0.376867	2.24123	0.0250109	0.0575882	ENSRNOG00000014465	Oca2	OCA2 melanosomal transmembrane protein [Source:RGD Symbol;Acc:2318412]
ENSRNOG00000029049	1026.84	0.0618432	0.0878664	0.703832	0.481537	0.605741	ENSRNOG00000029049	Zdhhc14	zinc finger DHHC-type palmitoyltransferase 14 [Source:RGD Symbol;Acc:1565877]
ENSRNOG00000017220	469.76	-0.265776	0.124982	-2.12653	0.0334595	0.0731752	ENSRNOG00000017220	Tcirg1	T-cell immune regulator 1, ATPase H+ transporting V0 subunit A3 [Source:RGD Symbol;Acc:735136]
ENSRNOG00000014779	1743.1	0.118734	0.066636	1.78183	0.0747771	0.141364	ENSRNOG00000014779	Pdcd4	programmed cell death 4 [Source:RGD Symbol;Acc:620816]
ENSRNOG00000031459	250.494	0.252023	0.1051	2.39794	0.0164877	0.0406551	ENSRNOG00000031459	Znf8	zinc finger protein 8 [Source:RGD Symbol;Acc:41193534]
ENSRNOG00000018336	59.005	-0.198021	0.22161	-0.893557	0.371559	0.499155	ENSRNOG00000018336	Eps8l2	EPS8-like 2 [Source:RGD Symbol;Acc:1310912]
ENSRNOG00000021011	40.6771	0.0369906	0.257196	0.143823	0.885641	0.924868	ENSRNOG00000021011	Fut2	fucosyltransferase 2 [Source:RGD Symbol;Acc:2639]
ENSRNOG00000055761	1139.41	-0.515192	0.102366	-5.03284	4.83262e-07	4.3887e-06	ENSRNOG00000055761	Zfp574	zinc finger protein 574 [Source:RGD Symbol;Acc:1311420]
ENSRNOG00000009891	848.456	0.197946	0.0760615	2.60244	0.00925625	0.0249887	ENSRNOG00000009891	Pcf11	PCF11 cleavage and polyadenylation factor subunit [Source:RGD Symbol;Acc:1563397]
ENSRNOG00000011058	2449.27	-0.110726	0.0882846	-1.25419	0.209773	0.322105	ENSRNOG00000011058	Utrn	utrophin [Source:RGD Symbol;Acc:3947]
ENSRNOG00000031113	292.109	0.0378568	0.122743	0.308423	0.757761	0.833899	ENSRNOG00000031113	Zscan22	zinc finger and SCAN domain containing 22 [Source:RGD Symbol;Acc:7606541]
ENSRNOG00000015972	301.163	0.4521	0.146563	3.08468	0.00203772	0.00691956	ENSRNOG00000015972	Ano5	anoctamin 5 [Source:RGD Symbol;Acc:1564265]
ENSRNOG00000047019	239.518	0.0251336	0.114099	0.220279	0.825654	0.884557	ENSRNOG00000047019	Bbip1	BBSome interacting protein 1 [Source:RGD Symbol;Acc:6498801]
ENSRNOG00000011077	3851.55	0.0694269	0.0709246	0.978883	0.327638	0.455631	ENSRNOG00000011077	Tjp1	tight junction protein 1 [Source:RGD Symbol;Acc:1306305]
ENSRNOG00000052687	2800.32	-0.377162	0.119227	-3.1634	0.00155936	0.00549876	ENSRNOG00000052687	Megf8	multiple EGF-like-domains 8 [Source:RGD Symbol;Acc:621190]
ENSRNOG00000019453	3032.12	-0.219475	0.0730285	-3.00534	0.00265284	0.00866391	ENSRNOG00000019453	Rps5	ribosomal protein S5 [Source:RGD Symbol;Acc:3601]
ENSRNOG00000014227	28.0769	-0.122021	0.3018	-0.40431	0.685985	0.780123	ENSRNOG00000014227	Mrgprx3	MAS related GPR family member X3 [Source:RGD Symbol;Acc:632282]
ENSRNOG00000015339	1150.97	0.637948	0.0792796	8.04681	8.49789e-16	4.8299e-14	ENSRNOG00000015339	Shoc2	SHOC2 leucine-rich repeat scaffold protein [Source:RGD Symbol;Acc:1308146]
ENSRNOG00000051208	86.0482	-0.426764	0.189216	-2.25544	0.024106	0.0558425	ENSRNOG00000051208	Selenov	selenoprotein V [Source:RGD Symbol;Acc:1562943]
ENSRNOG00000016697	101.282	-0.345035	0.178939	-1.92823	0.0538268	0.107856	ENSRNOG00000016697	Lrrc56	leucine rich repeat containing 56 [Source:RGD Symbol;Acc:1311654]
ENSRNOG00000020206	7586.27	0.127404	0.0677538	1.88039	0.060055	0.118179	ENSRNOG00000020206	Ctsd	cathepsin D [Source:RGD Symbol;Acc:621511]
ENSRNOG00000027436	183.636	-0.248431	0.120551	-2.06079	0.0393228	0.0836007	ENSRNOG00000027436	Zfp324	zinc finger protein 324 [Source:RGD Symbol;Acc:1306631]
ENSRNOG00000062814	3941.15	0.172812	0.0604969	2.85655	0.00428274	0.0130251	ENSRNOG00000062814	Cend1	cell cycle exit and neuronal differentiation 1 [Source:RGD Symbol;Acc:1309401]
ENSRNOG00000018524	1639.83	-0.463457	0.0606369	-7.64314	2.11982e-14	9.48715e-13	ENSRNOG00000018524	Ezr	ezrin [Source:RGD Symbol;Acc:621161]
ENSRNOG00000016147	58.8262	1.69977	0.682321	2.49116	0.0127326	0.0328149	ENSRNOG00000016147	Slc17a6	solute carrier family 17 member 6 [Source:RGD Symbol;Acc:620531]
ENSRNOG00000021056	360.285	-0.17438	0.10687	-1.6317	0.102743	0.183139	ENSRNOG00000021056	Kcnj14	potassium inwardly-rectifying channel, subfamily J, member 14 [Source:RGD Symbol;Acc:628872]
ENSRNOG00000037638	750.806	-0.237724	0.0944644	-2.51655	0.011851	0.0308944	ENSRNOG00000037638	Timm50	translocase of inner mitochondrial membrane 50 [Source:RGD Symbol;Acc:1587684]
ENSRNOG00000019199	82.2441	-0.635416	0.1871	-3.39613	0.000683449	0.00268001	ENSRNOG00000019199	Cracr2b	calcium release activated channel regulator 2B [Source:RGD Symbol;Acc:1560911]
ENSRNOG00000015218	580.494	-0.242228	0.078375	-3.09063	0.00199734	0.00680562	ENSRNOG00000015218	Nsmce1	NSE1 homolog, SMC5-SMC6 complex component [Source:RGD Symbol;Acc:1307760]
ENSRNOG00000015030	1698.18	-0.155986	0.0688379	-2.266	0.0234517	0.0545781	ENSRNOG00000015030	Tjp2	tight junction protein 2 [Source:RGD Symbol;Acc:619807]
ENSRNOG00000011015	2652.58	0.226329	0.0889802	2.54359	0.010972	0.0289464	ENSRNOG00000011015	Hivep2	HIVEP zinc finger 2 [Source:RGD Symbol;Acc:61988]
ENSRNOG00000020700	103.882	-0.323634	0.163964	-1.97381	0.0484036	0.0990061	ENSRNOG00000020700	Rnaseh2c	ribonuclease H2, subunit C [Source:RGD Symbol;Acc:2319141]
ENSRNOG00000064437	31.3969	0.3422	0.318098	1.07577	0.282031	0.406225	ENSRNOG00000064437
ENSRNOG00000016327	412.416	-0.11159	0.0852239	-1.30938	0.190406	0.298781	ENSRNOG00000016327	Mcee	methylmalonyl CoA epimerase [Source:RGD Symbol;Acc:1309966]
ENSRNOG00000014829	397.387	0.159984	0.0868745	1.84155	0.0655404	0.126756	ENSRNOG00000014829	Prmt3	protein arginine methyltransferase 3 [Source:RGD Symbol;Acc:620413]
ENSRNOG00000020044	483.971	-0.0875014	0.0852093	-1.0269	0.304467	0.431473	ENSRNOG00000020044	Mob2	MOB kinase activator 2 [Source:RGD Symbol;Acc:1562983]
ENSRNOG00000016595	81.24	-0.22609	0.182594	-1.23821	0.215637	0.328945	ENSRNOG00000016595	Hhex	hematopoietically expressed homeobox [Source:RGD Symbol;Acc:619932]
ENSRNOG00000056940	516.435	0.361005	0.115743	3.11903	0.00181448	0.00625145	ENSRNOG00000056940	Cited2	Cbp/p300-interacting transactivator, with Glu/Asp-rich carboxy-terminal domain, 2 [Source:RGD Symbol;Acc:620112]
ENSRNOG00000029490	277.434	-0.503941	0.125689	-4.00944	6.08635e-05	0.000322506	ENSRNOG00000029490	Znf768	zinc finger protein 768 [Source:RGD Symbol;Acc:7609558]
ENSRNOG00000009462	482.731	0.341851	0.0944228	3.62043	0.00029411	0.00128436	ENSRNOG00000009462	Ccdc90b	coiled-coil domain containing 90B [Source:RGD Symbol;Acc:1308637]
ENSRNOG00000060429	443.556	0.107096	0.0821722	1.30331	0.192468	0.301479	ENSRNOG00000060429	Zfp446	zinc finger protein 446 [Source:RGD Symbol;Acc:7612453]
ENSRNOG00000021109	67.0174	-0.391809	0.223923	-1.74975	0.0801611	0.149426	ENSRNOG00000021109	Odad1	outer dynein arm docking complex subunit 1 [Source:RGD Symbol;Acc:1308141]
ENSRNOG00000051450	283.751	0.283977	0.122848	2.31162	0.0207984	0.0494111	ENSRNOG00000051450	Abracl	ABRA C-terminal like [Source:RGD Symbol;Acc:1583256]
ENSRNOG00000061012	768.176	-0.057348	0.0696126	-0.823815	0.410045	0.536468	ENSRNOG00000061012	Kat5	lysine acetyltransferase 5 [Source:RGD Symbol;Acc:621061]
ENSRNOG00000021118	2693.73	-0.0691845	0.0629186	-1.09959	0.271512	0.394846	ENSRNOG00000021118	Nomo1	Nodal modulator 1 [Source:RGD Symbol;Acc:1305240]
ENSRNOG00000053735	39.4211	0.776686	0.270313	2.87328	0.00406229	0.0124786	ENSRNOG00000053735	Hebp2	heme binding protein 2 [Source:RGD Symbol;Acc:1311553]
ENSRNOG00000015911	311.913	-0.673826	0.145487	-4.63152	3.62985e-06	2.63393e-05	ENSRNOG00000015911	Lrp5	LDL receptor related protein 5 [Source:RGD Symbol;Acc:1309329]
ENSRNOG00000032034	3975.26	-0.199952	0.0666626	-2.99947	0.00270451	0.00880955	ENSRNOG00000032034	Supt5h	SPT5 homolog, DSIF elongation factor subunit [Source:RGD Symbol;Acc:1563807]
ENSRNOG00000061533	274.967	0.497564	0.127938	3.88911	0.000100612	0.000498987	ENSRNOG00000061533	Zfp945	zinc finger protein 945 [Source:RGD Symbol;Acc:2324317]
ENSRNOG00000009664	267.407	0.244079	0.116767	2.09031	0.0365899	0.0787396	ENSRNOG00000009664	Ankrd42	ankyrin repeat domain 42 [Source:RGD Symbol;Acc:1310789]
ENSRNOG00000021025	2784.41	-0.232438	0.0678828	-3.4241	0.000616838	0.00245291	ENSRNOG00000021025	Ppp2r5b	protein phosphatase 2, regulatory subunit B', beta [Source:RGD Symbol;Acc:727786]
ENSRNOG00000011994	33.2701	0.249544	0.307364	0.811885	0.416857	0.543117	ENSRNOG00000011994	Perp	p53 apoptosis effector related to PMP22 [Source:RGD Symbol;Acc:1310294]
ENSRNOG00000026572	30.9175	0.379031	0.383929	0.98724	0.323525	0.451505	ENSRNOG00000026572	Zfp473	zinc finger protein 473 [Source:RGD Symbol;Acc:1305084]
ENSRNOG00000020719	25.6841	-0.370145	0.328575	-1.12652	0.259947	0.381735	ENSRNOG00000020719	Hrc	histidine rich calcium binding protein [Source:RGD Symbol;Acc:727864]
ENSRNOG00000019560	16252.8	-0.124841	0.049772	-2.50825	0.012133	0.0314953	ENSRNOG00000019560	Pde2a	phosphodiesterase 2A [Source:RGD Symbol;Acc:620965]
ENSRNOG00000046480	64.8672	-0.0727126	0.207641	-0.350185	0.7262	0.811441	ENSRNOG00000046480	Zfp764l1	zinc finger protein 764 like 1 [Source:RGD Symbol;Acc:1594599]
ENSRNOG00000017365	33.4547	0.0950356	0.271499	0.350041	0.726308	0.811451	ENSRNOG00000017365	Klhl35	kelch-like family member 35 [Source:RGD Symbol;Acc:1565895]
ENSRNOG00000016807	1952	0.240149	0.0697983	3.44061	0.000580411	0.00232663	ENSRNOG00000016807	Oat	ornithine aminotransferase [Source:RGD Symbol;Acc:621724]
ENSRNOG00000015865	1220.19	-0.16889	0.077515	-2.1788	0.0293462	0.0657869	ENSRNOG00000015865	Ap2s1	adaptor related protein complex 2 subunit sigma 1 [Source:RGD Symbol;Acc:620188]
ENSRNOG00000018007	1030.65	-0.0486717	0.0721244	-0.67483	0.499784	0.621875	ENSRNOG00000018007	Gtf2h5	general transcription factor IIH subunit 5 [Source:RGD Symbol;Acc:1560991]
ENSRNOG00000028753	453.078	-0.0574042	0.114649	-0.500697	0.616584	0.721747	ENSRNOG00000028753	B9d2	B9 domain containing 2 [Source:RGD Symbol;Acc:1566122]
ENSRNOG00000020182	395.168	-0.613908	0.14398	-4.26383	2.00949e-05	0.000120699	ENSRNOG00000020182	Mvp	major vault protein [Source:RGD Symbol;Acc:70932]
ENSRNOG00000013190	959.515	-0.0705153	0.0783171	-0.900382	0.367917	0.495506	ENSRNOG00000013190	Rnaset2	ribonuclease T2 [Source:RGD Symbol;Acc:1309918]
ENSRNOG00000013795	224.257	0.43977	0.105966	4.15012	3.32302e-05	0.00018851	ENSRNOG00000013795	Asb7	ankyrin repeat and SOCS box-containing 7 [Source:RGD Symbol;Acc:1305154]
ENSRNOG00000060603	390.844	-0.567531	0.121309	-4.67838	2.89153e-06	2.16005e-05	ENSRNOG00000060603	Nhsl1	NHS-like 1 [Source:RGD Symbol;Acc:1308124]
ENSRNOG00000019970	666.123	0.0123494	0.073733	0.167488	0.866986	0.91272	ENSRNOG00000019970	mrpl11	mitochondrial ribosomal protein L11 [Source:RGD Symbol;Acc:1359665]
ENSRNOG00000061348	167.37	-0.311979	0.137497	-2.26898	0.0232695	0.054247	ENSRNOG00000061348	Fam53b	family with sequence similarity 53, member B [Source:RGD Symbol;Acc:1310799]
ENSRNOG00000031003	89.094	0.110177	0.174027	0.633099	0.526669	0.646465	ENSRNOG00000031003	Zfp764	zinc finger protein 764 [Source:RGD Symbol;Acc:7540019]
ENSRNOG00000020652	207.299	-0.384435	0.115943	-3.31571	0.000914099	0.00345311	ENSRNOG00000020652	Tgfb1	transforming growth factor, beta 1 [Source:RGD Symbol;Acc:69051]
ENSRNOG00000062473	70.7436	-0.373227	0.236509	-1.57807	0.11455	0.20015	ENSRNOG00000062473	Bbc3	Bcl-2 binding component 3 [Source:RGD Symbol;Acc:631434]
ENSRNOG00000060972	1026.21	0.309119	0.0845411	3.65644	0.000255745	0.00113573	ENSRNOG00000060972	Heca	hdc homolog, cell cycle regulator [Source:RGD Symbol;Acc:1304818]
ENSRNOG00000011975	200.527	-0.484452	0.116666	-4.15248	3.28888e-05	0.000186715	ENSRNOG00000011975	Crtc3	CREB regulated transcription coactivator 3 [Source:RGD Symbol;Acc:1309666]
ENSRNOG00000019132	356.249	0.0720667	0.0966021	0.746016	0.455658	0.581505	ENSRNOG00000019132	Fv1	Friend virus susceptibility 1 [Source:RGD Symbol;Acc:1309326]
ENSRNOG00000016368	127.64	0.0636243	0.176259	0.36097	0.718122	0.805816	ENSRNOG00000016368	Ppp1r14c	protein phosphatase 1, regulatory (inhibitor) subunit 14c [Source:RGD Symbol;Acc:620538]
ENSRNOG00000004273	32.3639	-0.20129	0.254511	-0.79089	0.429008	0.555222	ENSRNOG00000004273	Ifitm1	interferon induced transmembrane protein 1 [Source:RGD Symbol;Acc:1307601]
ENSRNOG00000021145	1239.25	-0.357436	0.107548	-3.3235	0.00088895	0.00337174	ENSRNOG00000021145	Gpr137	G protein-coupled receptor 137 [Source:RGD Symbol;Acc:1586317]
ENSRNOG00000054391	16549.2	0.189652	0.0423274	4.4806	7.44318e-06	4.95152e-05	ENSRNOG00000054391	Snrpn	small nuclear ribonucleoprotein polypeptide N [Source:RGD Symbol;Acc:621306]
ENSRNOG00000020731	2234.22	-0.591753	0.0899247	-6.58054	4.68738e-11	1.03344e-09	ENSRNOG00000020731	Ppfia3	PTPRF interacting protein alpha 3 [Source:RGD Symbol;Acc:620054]
ENSRNOG00000033343	32.0089	-0.595003	0.272977	-2.17968	0.029281	0.0656703	ENSRNOG00000033343	Prss36	serine protease 36 [Source:RGD Symbol;Acc:1593186]
ENSRNOG00000019578	10075.1	-0.185555	0.0576943	-3.21618	0.00129908	0.00468372	ENSRNOG00000019578	Rps16	ribosomal protein S16 [Source:RGD Symbol;Acc:621031]
ENSRNOG00000017137	248.98	-0.0645201	0.113344	-0.569243	0.569191	0.682136	ENSRNOG00000017137	Eef1akmt2	EEF1A lysine methyltransferase 2 [Source:RGD Symbol;Acc:1306300]
ENSRNOG00000020897	4837.72	0.0732359	0.0458806	1.59623	0.110438	0.194374	ENSRNOG00000020897	Prpf19	pre-mRNA processing factor 19 [Source:RGD Symbol;Acc:708496]
ENSRNOG00000014186	233.07	-0.0765472	0.112276	-0.681779	0.495379	0.617901	ENSRNOG00000014186	Zswim9	zinc finger SWIM-type containing 9 [Source:RGD Symbol;Acc:1310257]
ENSRNOG00000012055	2907.67	-0.150953	0.0612241	-2.46558	0.0136792	0.0348697	ENSRNOG00000012055	Man2a2	mannosidase, alpha, class 2A, member 2 [Source:RGD Symbol;Acc:1310238]
ENSRNOG00000017753	385.434	-0.284263	0.10734	-2.64825	0.00809097	0.0223185	ENSRNOG00000017753	Ercc2	ERCC excision repair 2, TFIIH core complex helicase subunit [Source:RGD Symbol;Acc:1309109]
ENSRNOG00000017975	35.7132	-0.478242	0.277486	-1.72348	0.0848013	0.156321	ENSRNOG00000017975	Dnajb13	DnaJ heat shock protein family (Hsp40) member B13 [Source:RGD Symbol;Acc:1359131]
ENSRNOG00000051915	354.116	0.0224785	0.091778	0.244923	0.806516	0.869702	ENSRNOG00000051915	Spred3	sprouty-related, EVH1 domain containing 3 [Source:RGD Symbol;Acc:1311713]
ENSRNOG00000020746	968.082	-0.325956	0.127331	-2.55992	0.0104696	0.0277875	ENSRNOG00000020746	Lin7b	lin-7 homolog B, crumbs cell polarity complex component [Source:RGD Symbol;Acc:620730]
ENSRNOG00000011411	680.718	0.201073	0.114115	1.76201	0.0780669	0.146325	ENSRNOG00000011411	Adgrg6	adhesion G protein-coupled receptor G6 [Source:RGD Symbol;Acc:1308551]
ENSRNOG00000068342	238.46	-0.0428437	0.102594	-0.417603	0.676237	0.771928	ENSRNOG00000068342	Coa4	cytochrome c oxidase assembly factor 4 homolog [Source:RGD Symbol;Acc:1562228]
ENSRNOG00000026517	826.684	-0.18722	0.0659133	-2.84039	0.00450579	0.0136286	ENSRNOG00000026517	Vrk3	VRK serine/threonine kinase 3 [Source:RGD Symbol;Acc:1549692]
ENSRNOG00000020991	35.1737	-0.0840146	0.288634	-0.291077	0.770992	0.843627	ENSRNOG00000020991	Ms4a6a	membrane spanning 4-domains A6A [Source:RGD Symbol;Acc:1305800]
ENSRNOG00000021147	891.036	-0.311598	0.0900912	-3.45869	0.000542805	0.00219531	ENSRNOG00000021147	Bad	BCL2-associated agonist of cell death [Source:RGD Symbol;Acc:620103]
ENSRNOG00000018106	94.5929	0.115096	0.17571	0.655035	0.512445	0.633165	ENSRNOG00000018106	Neu3	neuraminidase 3 [Source:RGD Symbol;Acc:619881]
ENSRNOG00000017621	2039.76	-0.38884	0.131967	-2.94649	0.00321407	0.0102156	ENSRNOG00000017621	Spns1	sphingolipid transporter 1 [Source:RGD Symbol;Acc:1305613]
ENSRNOG00000024056	490.667	0.250127	0.0836163	2.99136	0.00277735	0.00902127	ENSRNOG00000024056	Zfp715	zinc finger protein 715 [Source:RGD Symbol;Acc:1624201]
ENSRNOG00000010964	655.959	-0.416049	0.0867427	-4.79635	1.61579e-06	1.29367e-05	ENSRNOG00000010964	Akap13	A-kinase anchoring protein 13 [Source:RGD Symbol;Acc:727893]
ENSRNOG00000018411	446.384	0.173008	0.0961208	1.7999	0.0718762	0.137006	ENSRNOG00000018411	Pold3	DNA polymerase delta 3, accessory subunit [Source:RGD Symbol;Acc:1312027]
ENSRNOG00000014530	721.705	-0.152444	0.0986194	-1.54578	0.122157	0.210006	ENSRNOG00000014530	Nav2	neuron navigator 2 [Source:RGD Symbol;Acc:619778]
ENSRNOG00000011675	342.38	0.207283	0.123915	1.67278	0.0943698	0.170712	ENSRNOG00000011675	Zfp40	zinc finger protein 40 [Source:RGD Symbol;Acc:1593410]
ENSRNOG00000017446	1288.07	-0.315822	0.0882708	-3.57788	0.000346393	0.00147926	ENSRNOG00000017446	Ndufs8	NADH:ubiquinone oxidoreductase core subunit S8 [Source:RGD Symbol;Acc:1309436]
ENSRNOG00000016244	1653.21	-0.0653598	0.0876452	-0.745731	0.45583	0.581675	ENSRNOG00000016244	Mical2	microtubule associated monooxygenase, calponin and LIM domain containing 2 [Source:RGD Symbol;Acc:1311773]
ENSRNOG00000016815	984.447	0.391895	0.0737413	5.31446	1.06975e-07	1.14546e-06	ENSRNOG00000016815	Tmem135	transmembrane protein 135 [Source:RGD Symbol;Acc:1309948]
ENSRNOG00000018936	342.924	0.243551	0.103196	2.36009	0.0182707	0.0442786	ENSRNOG00000018936	Zfp780b-ps1	zinc finger protein 780B, pseudogene 1 [Source:RGD Symbol;Acc:2321719]
ENSRNOG00000014193	498.197	-0.205859	0.0940789	-2.18816	0.0286583	0.0645935	ENSRNOG00000014193	Lig1	DNA ligase 1 [Source:RGD Symbol;Acc:621424]
ENSRNOG00000014908	714.273	-0.257508	0.115639	-2.22682	0.025959	0.0594053	ENSRNOG00000014908	Sf3b5	splicing factor 3b, subunit 5 [Source:RGD Symbol;Acc:1586993]
ENSRNOG00000064302	40.028	0.504651	0.255264	1.97698	0.0480439	0.098459	ENSRNOG00000064302
ENSRNOG00000018379	136.478	-0.0754359	0.140416	-0.537233	0.591106	0.700092	ENSRNOG00000018379	Zfp688	zinc finger protein 688 [Source:RGD Symbol;Acc:1310765]
ENSRNOG00000053084	305.116	-0.536003	0.125656	-4.26563	1.9934e-05	0.00011986	ENSRNOG00000053084	Fuz	fuzzy planar cell polarity protein [Source:RGD Symbol;Acc:1310608]
ENSRNOG00000012322	196.652	0.0491104	0.138349	0.354974	0.722609	0.808924	ENSRNOG00000012322	Pex7	peroxisomal biogenesis factor 7 [Source:RGD Symbol;Acc:1308483]
ENSRNOG00000019254	470.268	-0.639369	0.130358	-4.90473	9.35554e-07	7.9594e-06	ENSRNOG00000019254	Dyrk1b	dual specificity tyrosine phosphorylation regulated kinase 1B [Source:RGD Symbol;Acc:1307223]
ENSRNOG00000017243	3181.78	0.574666	0.0726461	7.91049	2.56378e-15	1.36382e-13	ENSRNOG00000017243	Bnip3	BCL2 interacting protein 3 [Source:RGD Symbol;Acc:620800]
ENSRNOG00000011526	898.31	-0.179998	0.0883988	-2.0362	0.04173	0.0879059	ENSRNOG00000011526	Pcsk6	proprotein convertase subtilisin/kexin type 6 [Source:RGD Symbol;Acc:3246]
ENSRNOG00000053366	138.112	0.333258	0.159274	2.09236	0.0364067	0.0784613	ENSRNOG00000053366	Zfp59	zinc finger protein 59 [Source:RGD Symbol;Acc:1591403]
ENSRNOG00000011882	1036.24	-0.0333829	0.0719285	-0.464112	0.642567	0.744524	ENSRNOG00000011882	Gab2	GRB2-associated binding protein 2 [Source:RGD Symbol;Acc:621367]
ENSRNOG00000018766	255.132	0.11616	0.121733	0.954219	0.339973	0.467647	ENSRNOG00000018766	Rrp8	ribosomal RNA processing 8 [Source:RGD Symbol;Acc:1308302]
ENSRNOG00000021103	3253.97	-0.293475	0.100575	-2.91796	0.00352325	0.0110456	ENSRNOG00000021103	Nrxn2	neurexin 2 [Source:RGD Symbol;Acc:620211]
ENSRNOG00000046727	37.0115	0.426344	0.268524	1.58773	0.112347	0.197063	ENSRNOG00000046727	Abcc2	ATP binding cassette subfamily C member 2 [Source:RGD Symbol;Acc:2366]
ENSRNOG00000049517	226.205	-0.203002	0.125826	-1.61335	0.106669	0.189078	ENSRNOG00000049517	Tnfaip3	TNF alpha induced protein 3 [Source:RGD Symbol;Acc:1589275]
ENSRNOG00000017512	385.431	-0.196979	0.118172	-1.66688	0.0955388	0.172269	ENSRNOG00000017512	Aldh3b1	aldehyde dehydrogenase 3 family, member B1 [Source:RGD Symbol;Acc:1359546]
ENSRNOG00000037580	1683.45	-0.024417	0.0631651	-0.386559	0.699083	0.790471	ENSRNOG00000037580	Psmd8	proteasome 26S subunit, non-ATPase 8 [Source:RGD Symbol;Acc:1309842]
ENSRNOG00000012074	1281.8	-0.260267	0.0861974	-3.01943	0.00253252	0.00832916	ENSRNOG00000012074	Ifngr1	interferon gamma receptor 1 [Source:RGD Symbol;Acc:620570]
ENSRNOG00000017012	436.525	-0.361414	0.0926297	-3.90171	9.55153e-05	0.000477513	ENSRNOG00000017012	Coq7	coenzyme Q7, hydroxylase [Source:RGD Symbol;Acc:2381]
ENSRNOG00000068955	2964.21	-0.316208	0.0576132	-5.48846	4.05444e-08	4.71274e-07	ENSRNOG00000068955	Rps13	ribosomal protein S13 [Source:RGD Symbol;Acc:621027]
ENSRNOG00000019730	1268.97	-0.622561	0.0611082	-10.1878	2.24686e-24	6.99711e-22	ENSRNOG00000019730	Inppl1	inositol polyphosphate phosphatase-like 1 [Source:RGD Symbol;Acc:68396]
ENSRNOG00000019776	1163.7	-0.0871774	0.0719781	-1.21117	0.225832	0.341431	ENSRNOG00000019776	Sh3gl3	SH3 domain containing GRB2 like 3, endophilin A3 [Source:RGD Symbol;Acc:620578]
ENSRNOG00000014030	839.328	-0.245756	0.0968068	-2.53863	0.0111288	0.029272	ENSRNOG00000014030	Synm	synemin [Source:RGD Symbol;Acc:727872]
ENSRNOG00000049944	2438.75	-0.0746585	0.0804883	-0.927569	0.353631	0.48107	ENSRNOG00000049944	Slc25a22	solute carrier family 25 member 22 [Source:RGD Symbol;Acc:1307826]
ENSRNOG00000023968	57.116	0.0618559	0.223188	0.277147	0.781667	0.851181	ENSRNOG00000023968	Fancf	FA complementation group F [Source:RGD Symbol;Acc:1561456]
ENSRNOG00000026243	3445.82	-0.206967	0.0774016	-2.67394	0.00749664	0.0209301	ENSRNOG00000026243	Ap2a1	adaptor related protein complex 2 subunit alpha 1 [Source:RGD Symbol;Acc:1306254]
ENSRNOG00000066277	489.198	-0.259409	0.106347	-2.43927	0.014717	0.0370477	ENSRNOG00000066277	Zfp689	zinc finger protein 689 [Source:RGD Symbol;Acc:628696]
ENSRNOG00000016717	157.148	0.376927	0.135896	2.77365	0.00554313	0.016215	ENSRNOG00000016717	Gas2	growth arrest-specific 2 [Source:RGD Symbol;Acc:1563167]
ENSRNOG00000055371	2821.95	-0.43518	0.122632	-3.54867	0.000387175	0.00163028	ENSRNOG00000055371	Sptbn4	spectrin, beta, non-erythrocytic 4 [Source:RGD Symbol;Acc:1304682]
ENSRNOG00000020533	3496.73	-0.484954	0.0821308	-5.90465	3.53395e-09	5.25627e-08	ENSRNOG00000020533	Htra1	HtrA serine peptidase 1 [Source:RGD Symbol;Acc:69235]
ENSRNOG00000059224	781.702	-0.0465649	0.0694945	-0.670051	0.502825	0.624842	ENSRNOG00000059224	Reps1	RALBP1 associated Eps domain containing 1 [Source:RGD Symbol;Acc:1307131]
ENSRNOG00000018960	12401.2	-0.125819	0.0580988	-2.1656	0.0303414	0.0675418	ENSRNOG00000018960	Syne1	spectrin repeat containing nuclear envelope protein 1 [Source:RGD Symbol;Acc:620546]
ENSRNOG00000037080	37.6395	-0.75915	0.258751	-2.9339	0.00334736	0.010574	ENSRNOG00000037080	Adamts17	ADAM metallopeptidase with thrombospondin type 1 motif, 17 [Source:RGD Symbol;Acc:1308783]
ENSRNOG00000050453	194.89	-0.0502586	0.118147	-0.425389	0.670553	0.767603	ENSRNOG00000050453	Fbxo27	F-box protein 27 [Source:RGD Symbol;Acc:1563982]
ENSRNOG00000014061	59.7375	0.571484	0.217362	2.62919	0.00855891	0.0234277	ENSRNOG00000014061	Dusp5	dual specificity phosphatase 5 [Source:RGD Symbol;Acc:620854]
ENSRNOG00000018873	3980.33	-0.033744	0.0649638	-0.519428	0.603462	0.710783	ENSRNOG00000018873	Fam168a	family with sequence similarity 168, member A [Source:RGD Symbol;Acc:1308929]
ENSRNOG00000042776	103.684	-0.0140099	0.165993	-0.0844004	0.932738	0.955232	ENSRNOG00000042776	Lins1	lines homolog 1 [Source:RGD Symbol;Acc:1308792]
ENSRNOG00000021004	385.808	-0.66587	0.102169	-6.51736	7.15563e-11	1.50228e-09	ENSRNOG00000021004	Rasip1	Ras interacting protein 1 [Source:RGD Symbol;Acc:1305291]
ENSRNOG00000063590	173.953	-0.348727	0.149986	-2.32506	0.0200687	0.0479213	ENSRNOG00000063590	Fzd4	frizzled class receptor 4 [Source:RGD Symbol;Acc:71017]
ENSRNOG00000018994	1788.68	-0.028353	0.0633134	-0.44782	0.654283	0.754997	ENSRNOG00000018994	Psmc4	proteasome 26S subunit, ATPase 4 [Source:RGD Symbol;Acc:621102]
ENSRNOG00000017703	308.86	-0.172376	0.118712	-1.45205	0.146489	0.242473	ENSRNOG00000017703	Unc93b1	unc-93 homolog B1, TLR signaling regulator [Source:RGD Symbol;Acc:1311984]
ENSRNOG00000019746	1524.55	-0.0622122	0.0642615	-0.968109	0.33299	0.461139	ENSRNOG00000019746	Paf1	PAF1 homolog, Paf1/RNA polymerase II complex component [Source:RGD Symbol;Acc:1306219]
ENSRNOG00000013836	352.1	-0.405579	0.1131	-3.58602	0.00033576	0.0014414	ENSRNOG00000013836	Arhgap17	Rho GTPase activating protein 17 [Source:RGD Symbol;Acc:628767]
ENSRNOG00000011945	2058.94	0.0614927	0.0740239	0.830714	0.406135	0.532816	ENSRNOG00000011945	Cyfip1	cytoplasmic FMR1 interacting protein 1 [Source:RGD Symbol;Acc:1310332]
ENSRNOG00000029366	4228.43	0.0462657	0.0724439	0.638642	0.523056	0.64318	ENSRNOG00000029366	Prrt2	proline-rich transmembrane protein 2 [Source:RGD Symbol;Acc:1564195]
ENSRNOG00000058388	183.666	-0.371428	0.142281	-2.61053	0.00904026	0.0245361	ENSRNOG00000058388	Zfp36	zinc finger protein 36 [Source:RGD Symbol;Acc:620722]
ENSRNOG00000020848	803.304	-0.256321	0.120143	-2.13347	0.0328863	0.0721221	ENSRNOG00000020848	Coq8b	coenzyme Q8B [Source:RGD Symbol;Acc:1311356]
ENSRNOG00000018518	643.802	-0.27711	0.0886201	-3.12694	0.00176635	0.00611899	ENSRNOG00000018518	Prr14	proline rich 14 [Source:RGD Symbol;Acc:1594592]
ENSRNOG00000019702	394.587	0.0449612	0.0947075	0.474737	0.634974	0.737899	ENSRNOG00000019702	Med29	mediator complex subunit 29 [Source:RGD Symbol;Acc:1311009]
ENSRNOG00000055142	30.0393	0.111022	0.286323	0.387752	0.6982	0.789996	ENSRNOG00000055142	Ect2l	epithelial cell transforming 2 like [Source:RGD Symbol;Acc:9246970]
ENSRNOG00000012690	581.515	0.503092	0.0941062	5.346	8.99189e-08	9.83974e-07	ENSRNOG00000012690	Nipa2	NIPA magnesium transporter 2 [Source:RGD Symbol;Acc:1306051]
ENSRNOG00000017097	1266.5	-0.401182	0.0824201	-4.86753	1.12999e-06	9.40849e-06	ENSRNOG00000017097	Lhpp	phospholysine phosphohistidine inorganic pyrophosphate phosphatase [Source:RGD Symbol;Acc:1359187]
ENSRNOG00000018850	191.384	-0.452282	0.194245	-2.32841	0.0198905	0.0475641	ENSRNOG00000018850	Ttc9b	tetratricopeptide repeat domain 9B [Source:RGD Symbol;Acc:1306256]
ENSRNOG00000020486	39.1535	-0.741487	0.236234	-3.13877	0.00169656	0.00591698	ENSRNOG00000020486	Bcl2l12	Bcl2 like 12 [Source:RGD Symbol;Acc:1307361]
ENSRNOG00000060599	1085.32	0.533837	0.12279	4.34755	1.37666e-05	8.68281e-05	ENSRNOG00000060599	Gabrb3	gamma-aminobutyric acid type A receptor subunit beta 3 [Source:RGD Symbol;Acc:2651]
ENSRNOG00000042702	3078.38	0.569935	0.0760906	7.49022	6.87586e-14	2.80056e-12	ENSRNOG00000042702	Nipa1	NIPA magnesium transporter 1 [Source:RGD Symbol;Acc:1305401]
ENSRNOG00000019949	253.137	-0.278318	0.123486	-2.25384	0.0242062	0.0560114	ENSRNOG00000019949	Mrps12	mitochondrial ribosomal protein S12 [Source:RGD Symbol;Acc:1306221]
ENSRNOG00000025126	55.8167	0.106109	0.189631	0.559555	0.575783	0.687554	ENSRNOG00000025126	Palb2	partner and localizer of BRCA2 [Source:RGD Symbol;Acc:1304759]
ENSRNOG00000020867	1339.48	-0.361826	0.116781	-3.09834	0.00194608	0.00664913	ENSRNOG00000020867	Numbl	NUMB-like, endocytic adaptor protein [Source:RGD Symbol;Acc:1307579]
ENSRNOG00000015807	355.956	-0.688926	0.120085	-5.73697	9.6387e-09	1.30507e-07	ENSRNOG00000015807	Pyroxd2	pyridine nucleotide-disulphide oxidoreductase domain 2 [Source:RGD Symbol;Acc:1303232]
ENSRNOG00000025651	449.193	0.525105	0.0855232	6.13991	8.25665e-10	1.40091e-08	ENSRNOG00000025651	Ikzf5	IKAROS family zinc finger 5 [Source:RGD Symbol;Acc:1310965]
ENSRNOG00000011282	9191.23	0.0382405	0.0445775	0.857842	0.390979	0.518485	ENSRNOG00000011282	Ppp2r1a	protein phosphatase 2 scaffold subunit A alpha [Source:RGD Symbol;Acc:620907]
ENSRNOG00000019962	286.482	-0.30909	0.175068	-1.76554	0.0774732	0.145395	ENSRNOG00000019962	Sars2	seryl-tRNA synthetase 2, mitochondrial [Source:RGD Symbol;Acc:1309456]
ENSRNOG00000023521	2795.52	-1.0082	0.176817	-5.70195	1.18443e-08	1.57405e-07	ENSRNOG00000023521	Map3k10	mitogen activated protein kinase kinase kinase 10 [Source:RGD Symbol;Acc:1308381]
ENSRNOG00000055028	910.381	-0.377914	0.0948671	-3.98361	6.78764e-05	0.000353771	ENSRNOG00000055028	Setd1a	SET domain containing 1A, histone lysine methyltransferase [Source:RGD Symbol;Acc:1311624]
ENSRNOG00000015560	807.181	0.236058	0.0741837	3.18208	0.00146223	0.00520292	ENSRNOG00000015560	Emsy	EMSY transcriptional repressor, BRCA2 interacting [Source:RGD Symbol;Acc:1310712]
ENSRNOG00000032723	321.876	-0.194136	0.100404	-1.93354	0.0531692	0.106796	ENSRNOG00000032723	Efl1	elongation factor like GTPase 1 [Source:RGD Symbol;Acc:1306521]
ENSRNOG00000043388	939.672	-0.469313	0.142408	-3.29556	0.000982247	0.00367433	ENSRNOG00000043388	Irf3	interferon regulatory factor 3 [Source:RGD Symbol;Acc:1549774]
ENSRNOG00000042728	1191.07	-0.335282	0.0932295	-3.5963	0.000322771	0.00139123	ENSRNOG00000042728	Fbrs	fibrosin [Source:RGD Symbol;Acc:1594591]
ENSRNOG00000011460	729.725	0.448466	0.122726	3.65421	0.000257973	0.00114495	ENSRNOG00000011460	Arfgef3	ARFGEF family member 3 [Source:RGD Symbol;Acc:1309903]
ENSRNOG00000013009	5453.31	0.22253	0.0582264	3.8218	0.000132482	0.000638408	ENSRNOG00000013009	Ldha	lactate dehydrogenase A [Source:RGD Symbol;Acc:2996]
ENSRNOG00000020615	2626.98	0.0330464	0.0562067	0.587944	0.55657	0.671857	ENSRNOG00000020615	Nap1l4	nucleosome assembly protein 1-like 4 [Source:RGD Symbol;Acc:1305391]
ENSRNOG00000017109	40.6969	-0.202457	0.2316	-0.874168	0.382027	0.509642	ENSRNOG00000017109	Rassf7	Ras association domain family member 7 [Source:RGD Symbol;Acc:1306244]
ENSRNOG00000021117	2616.06	-0.460231	0.0861152	-5.34436	9.07384e-08	9.9149e-07	ENSRNOG00000021117	Rps6ka4	ribosomal protein S6 kinase A4 [Source:RGD Symbol;Acc:1307277]
ENSRNOG00000020130	1225.46	-0.666874	0.121693	-5.47997	4.25397e-08	4.92933e-07	ENSRNOG00000020130	Arhgef1	Rho guanine nucleotide exchange factor 1 [Source:RGD Symbol;Acc:620951]
ENSRNOG00000019529	5116.18	0.127941	0.065534	1.95229	0.050904	0.103007	ENSRNOG00000019529	Btbd1	BTB domain containing 1 [Source:RGD Symbol;Acc:1310962]
ENSRNOG00000010803	348.001	-0.113622	0.123342	-0.921195	0.356948	0.48484	ENSRNOG00000010803	Gabra5	gamma-aminobutyric acid type A receptor subunit alpha 5 [Source:RGD Symbol;Acc:61859]
ENSRNOG00000016374	4241.68	0.0753317	0.0512615	1.46956	0.141681	0.236368	ENSRNOG00000016374	Fgfr2	fibroblast growth factor receptor 2 [Source:RGD Symbol;Acc:2611]
ENSRNOG00000026114	167.707	-0.199708	0.16272	-1.22731	0.219706	0.333824	ENSRNOG00000026114	Ap5b1	adaptor related protein complex 5 subunit beta 1 [Source:RGD Symbol;Acc:1562657]
ENSRNOG00000026514	32.7102	0.0276868	0.248557	0.11139	0.911307	0.941151	ENSRNOG00000026514	Wdr93	WD repeat domain 93 [Source:RGD Symbol;Acc:1559862]
ENSRNOG00000020557	425.839	-0.152739	0.177141	-0.862249	0.388551	0.515677	ENSRNOG00000020557	Ryr1	ryanodine receptor 1 [Source:RGD Symbol;Acc:1586637]
ENSRNOG00000056946	2692.35	-0.797178	0.168777	-4.72326	2.32089e-06	1.78276e-05	ENSRNOG00000056946	Scaf1	SR-related CTD-associated factor 1 [Source:RGD Symbol;Acc:708405]
ENSRNOG00000058030	311.023	0.259689	0.111299	2.33325	0.0196353	0.0470441	ENSRNOG00000058030	Zfp748-ps1	zinc finger protein 748, pseudogene 1 [Source:RGD Symbol;Acc:1585783]
ENSRNOG00000011313	1200.19	0.211154	0.0735318	2.8716	0.00408396	0.0125238	ENSRNOG00000011313	Sorcs1	sortilin-related VPS10 domain containing receptor 1 [Source:RGD Symbol;Acc:1305910]
ENSRNOG00000049179	96.9889	-0.43757	0.220967	-1.98025	0.047676	0.0978392	ENSRNOG00000049179	Pidd1	p53-induced death domain protein 1 [Source:RGD Symbol;Acc:1311792]
ENSRNOG00000032246	34.8144	0.00584285	0.265709	0.0219897	0.982456	0.989482	ENSRNOG00000032246	Acsm3	acyl-CoA synthetase medium-chain family member 3 [Source:RGD Symbol;Acc:62086]
ENSRNOG00000020660	16596.3	-0.0349394	0.0363385	-0.961498	0.336302	0.464263	ENSRNOG00000020660	Cfl1	cofilin 1 [Source:RGD Symbol;Acc:69285]
ENSRNOG00000025075	157.094	0.0248456	0.132961	0.186863	0.851768	0.901606	ENSRNOG00000025075	Relt	RELT, TNF receptor [Source:RGD Symbol;Acc:1305381]
ENSRNOG00000019426	417.376	0.385518	0.103956	3.70847	0.000208516	0.000951772	ENSRNOG00000019426	Ramac	RNA guanine-7 methyltransferase activating subunit [Source:RGD Symbol;Acc:1310022]
ENSRNOG00000013718	3705.56	-0.00462731	0.0512978	-0.0902049	0.928124	0.952254	ENSRNOG00000013718	Herc2	HECT and RLD domain containing E3 ubiquitin protein ligase 2 [Source:RGD Symbol;Acc:1307989]
ENSRNOG00000037247	285.335	-0.359463	0.10052	-3.57603	0.000348851	0.00148734	ENSRNOG00000037247	Rras	RAS related [Source:RGD Symbol;Acc:1311443]
ENSRNOG00000065597	45.1572	0.0853335	0.240683	0.354547	0.722929	0.8091	ENSRNOG00000065597
ENSRNOG00000052273	484.941	0.041759	0.0955477	0.437048	0.662076	0.761227	ENSRNOG00000052273	C1h15orf40	similar to human chromosome 15 open reading frame 40 [Source:RGD Symbol;Acc:1305713]
ENSRNOG00000013969	2725.06	0.217326	0.092311	2.35428	0.0185588	0.0448894	ENSRNOG00000013969	Ahi1	Abelson helper integration site 1 [Source:RGD Symbol;Acc:1303040]
ENSRNOG00000018462	305.695	-0.380089	0.144034	-2.63889	0.0083179	0.0228643	ENSRNOG00000018462	Rabep2	rabaptin, RAB GTPase binding effector protein 2 [Source:RGD Symbol;Acc:621416]
ENSRNOG00000016429	2748.06	0.552145	0.157826	3.49845	0.000467964	0.00192332	ENSRNOG00000016429	Grm5	glutamate metabotropic receptor 5 [Source:RGD Symbol;Acc:2746]
ENSRNOG00000012366	1781.2	0.0963838	0.0557173	1.72987	0.0836529	0.154662	ENSRNOG00000012366	Mesd	mesoderm development LRP chaperone [Source:RGD Symbol;Acc:1310344]
ENSRNOG00000019080	339.878	-0.237953	0.0969537	-2.4543	0.0141161	0.0357579	ENSRNOG00000019080	Hsd3b7	hydroxy-delta-5-steroid dehydrogenase, 3 beta- and steroid delta-isomerase 7 [Source:RGD Symbol;Acc:628727]
ENSRNOG00000059492	347.234	0.318524	0.0981676	3.2447	0.00117575	0.0043015	ENSRNOG00000059492	LOC100365363	vomeronasal 1 receptor, F4-like [Source:RGD Symbol;Acc:2319215]
ENSRNOG00000020489	278.999	-0.307247	0.152711	-2.01195	0.0442254	0.0920918	ENSRNOG00000020489	Tmem145	transmembrane protein 145 [Source:RGD Symbol;Acc:1595911]
ENSRNOG00000018993	2078.04	-0.182369	0.0480794	-3.79308	0.000148788	0.000704272	ENSRNOG00000018993	Ilk	integrin-linked kinase [Source:RGD Symbol;Acc:620063]
ENSRNOG00000018916	246.717	-0.519276	0.106412	-4.87985	1.06165e-06	8.89051e-06	ENSRNOG00000018916	Bcl7c	BAF chromatin remodeling complex subunit BCL7C [Source:RGD Symbol;Acc:1308439]
ENSRNOG00000066224	119.541	0.332038	0.166454	1.99478	0.0460673	0.0951334	ENSRNOG00000066224	LOC102548728	zinc finger protein 845-like [Source:RGD Symbol;Acc:7537348]
ENSRNOG00000014673	140.952	0.20164	0.149306	1.35051	0.176851	0.281861	ENSRNOG00000014673	Eri2	ERI1 exoribonuclease family member 2 [Source:RGD Symbol;Acc:1583889]
ENSRNOG00000016206	788.483	-0.000762469	0.0656536	-0.0116135	0.990734	0.994393	ENSRNOG00000016206	Uvrag	UV radiation resistance associated [Source:RGD Symbol;Acc:1589754]
ENSRNOG00000016210	37.0624	-0.442967	0.272571	-1.62514	0.104132	0.185284	ENSRNOG00000016210	Mical2	microtubule associated monooxygenase, calponin and LIM domain containing 2 [Source:RGD Symbol;Acc:1311773]
ENSRNOG00000019145	2034.45	0.0244101	0.05262	0.463894	0.642724	0.744647	ENSRNOG00000019145	Kdm2a	lysine demethylase 2A [Source:RGD Symbol;Acc:1309419]
ENSRNOG00000019674	642.794	-0.407882	0.114254	-3.56995	0.000357054	0.00151842	ENSRNOG00000019674	Mfsd13a	major facilitator superfamily domain containing 13A [Source:RGD Symbol;Acc:1309313]
ENSRNOG00000020617	311.784	-0.246736	0.133543	-1.84761	0.0646585	0.125473	ENSRNOG00000020617	Mus81	MUS81 structure-specific endonuclease subunit [Source:RGD Symbol;Acc:1311957]
ENSRNOG00000017021	578.17	-0.117129	0.126793	-0.923784	0.355599	0.483315	ENSRNOG00000017021	Galnt18	polypeptide N-acetylgalactosaminyltransferase 18 [Source:RGD Symbol;Acc:1309623]
ENSRNOG00000011932	392.301	-0.21262	0.0847158	-2.5098	0.0120799	0.0313762	ENSRNOG00000011932	Snrpa1	small nuclear ribonucleoprotein polypeptide A' [Source:RGD Symbol;Acc:2320494]
ENSRNOG00000013436	965.189	0.0739414	0.0975116	0.758283	0.448281	0.574808	ENSRNOG00000013436	Pde7b	phosphodiesterase 7B [Source:RGD Symbol;Acc:621016]
ENSRNOG00000065747	48.6112	0.681467	0.27724	2.45805	0.0139696	0.0354941	ENSRNOG00000065747
ENSRNOG00000013381	2004.11	0.231006	0.055646	4.15136	3.30507e-05	0.000187563	ENSRNOG00000013381	Tsg101	tumor susceptibility 101 [Source:RGD Symbol;Acc:3909]
ENSRNOG00000020479	1144.86	0.534856	0.099504	5.37522	7.64879e-08	8.49437e-07	ENSRNOG00000020479	Pik3c2a	phosphatidylinositol-4-phosphate 3-kinase, catalytic subunit type 2 alpha [Source:RGD Symbol;Acc:1310389]
ENSRNOG00000036859	1408.79	-0.0918412	0.0782941	-1.17303	0.240785	0.358277	ENSRNOG00000036859	Gdpd5	glycerophosphodiester phosphodiesterase domain containing 5 [Source:RGD Symbol;Acc:1559673]
ENSRNOG00000019883	237.83	-0.572378	0.138292	-4.1389	3.48973e-05	0.00019652	ENSRNOG00000019883	Pak4	p21 (RAC1) activated kinase 4 [Source:RGD Symbol;Acc:1307705]
ENSRNOG00000016683	65.7141	-0.39061	0.195749	-1.99547	0.045992	0.0950488	ENSRNOG00000016683	Zfp668	zinc finger protein 668 [Source:RGD Symbol;Acc:1308623]
ENSRNOG00000051867	30.9185	0.717476	0.302077	2.37515	0.017542	0.0427769	ENSRNOG00000051867	Zfp758	zinc finger protein 600 [Source:RGD Symbol;Acc:9286049]
ENSRNOG00000045741	48.1023	0.150804	0.283604	0.531739	0.594907	0.703039	ENSRNOG00000045741	AABR07071891.2
ENSRNOG00000057384	191.344	0.116983	0.122561	0.954486	0.339837	0.467589	ENSRNOG00000057384	Nfatc2ip	nuclear factor of activated T-cells 2 interacting protein [Source:RGD Symbol;Acc:1359096]
ENSRNOG00000011308	1213.77	0.0286208	0.0587024	0.487557	0.625863	0.730207	ENSRNOG00000011308	Uhrf2	ubiquitin like with PHD and ring finger domains 2 [Source:RGD Symbol;Acc:1309990]
ENSRNOG00000030266	238.862	-0.737708	0.203745	-3.62073	0.00029377	0.00128325	ENSRNOG00000030266	Plekhg2	pleckstrin homology and RhoGEF domain containing G2 [Source:RGD Symbol;Acc:1310112]
ENSRNOG00000021140	192.053	-0.467499	0.144191	-3.24221	0.00118606	0.00433053	ENSRNOG00000021140	Kcnk4	potassium two pore domain channel subfamily K member 4 [Source:RGD Symbol;Acc:621449]
ENSRNOG00000016573	1934.69	-0.0324813	0.057693	-0.563002	0.573434	0.685735	ENSRNOG00000016573	Dgat2	diacylglycerol O-acyltransferase 2 [Source:RGD Symbol;Acc:620329]
ENSRNOG00000051578	168.232	0.255054	0.163112	1.56367	0.117895	0.204727	ENSRNOG00000051578	Zfp54	zinc finger protein 54 [Source:RGD Symbol;Acc:1307738]
ENSRNOG00000025167	610.308	-0.458214	0.11898	-3.85118	0.000117549	0.000574597	ENSRNOG00000025167	Sema4b	semaphorin 4B [Source:RGD Symbol;Acc:1307872]
ENSRNOG00000021763	26.0946	0.19581	0.323705	0.604902	0.545244	0.662871	ENSRNOG00000021763	Ffar4	free fatty acid receptor 4 [Source:RGD Symbol;Acc:1308252]
ENSRNOG00000066618	262.576	-0.193872	0.135565	-1.43011	0.152687	0.250561	ENSRNOG00000066618	Sfxn2	sideroflexin 2 [Source:RGD Symbol;Acc:1306131]
ENSRNOG00000020495	1716.94	-0.150971	0.0494629	-3.05221	0.0022716	0.00760548	ENSRNOG00000020495	Eif3k	eukaryotic translation initiation factor 3, subunit K [Source:RGD Symbol;Acc:1309221]
ENSRNOG00000060206	856.043	-0.160601	0.0605566	-2.65208	0.00799971	0.0221321	ENSRNOG00000060206	Zfp592	zinc finger protein 592 [Source:RGD Symbol;Acc:1308705]
ENSRNOG00000020596	866.464	-0.0285664	0.0930956	-0.30685	0.758957	0.834613	ENSRNOG00000020596	Dmac2	distal membrane arm assembly component 2 [Source:RGD Symbol;Acc:1549698]
ENSRNOG00000056036	151.586	0.163833	0.163007	1.00507	0.314864	0.442182	ENSRNOG00000056036	Zfp51	zinc finger protein 51 [Source:RGD Symbol;Acc:9163837]
ENSRNOG00000055531	329.406	-0.0255586	0.101381	-0.252105	0.80096	0.86527	ENSRNOG00000055531	Hps5	serum amyloid A4 [Source:RGD Symbol;Acc:1307371]
ENSRNOG00000045838	284.755	-0.772908	0.186957	-4.13414	3.5629e-05	0.000199993	ENSRNOG00000045838	Hps1	HPS1, biogenesis of lysosomal organelles complex 3 subunit 1 [Source:RGD Symbol;Acc:69193]
ENSRNOG00000020904	1027.63	-0.235621	0.0686663	-3.43139	0.000600498	0.00239303	ENSRNOG00000020904	Cdc42ep2	CDC42 effector protein 2 [Source:RGD Symbol;Acc:1310253]
ENSRNOG00000020271	2103.91	0.189466	0.0662426	2.86018	0.00423397	0.0129032	ENSRNOG00000020271	Tial1	Tia1 cytotoxic granule-associated RNA binding protein-like 1 [Source:RGD Symbol;Acc:1595845]
ENSRNOG00000032668	182.427	0.0314068	0.119934	0.261868	0.793424	0.86001	ENSRNOG00000032668	LOC102550291	zinc finger protein 658-like [Source:RGD Symbol;Acc:7570552]
ENSRNOG00000028113	207.455	0.0453738	0.116113	0.390773	0.695965	0.788008	ENSRNOG00000028113	Whamm	WASP homolog associated with actin, golgi membranes and microtubules [Source:RGD Symbol;Acc:1563506]
ENSRNOG00000047124	30.132	0.51307	0.536322	0.956647	0.338746	0.466731	ENSRNOG00000047124	Atp2a1	ATPase sarcoplasmic/endoplasmic reticulum Ca2+ transporting 1 [Source:RGD Symbol;Acc:621293]
ENSRNOG00000012067	157.807	-0.196693	0.489562	-0.401774	0.687851	0.781306	ENSRNOG00000012067	Fam111a	FAM111 trypsin like peptidase A [Source:RGD Symbol;Acc:1560913]
ENSRNOG00000026115	364.256	-0.292188	0.10097	-2.89381	0.00380604	0.0118133	ENSRNOG00000026115	Zfp646	zinc finger protein 646 [Source:RGD Symbol;Acc:1561579]
ENSRNOG00000042347	90.7862	0.252598	0.162399	1.55542	0.119847	0.207298	ENSRNOG00000042347	Zfp53	zinc finger protein 53 [Source:RGD Symbol;Acc:1308573]
ENSRNOG00000026857	149.894	-0.919797	0.144574	-6.3621	1.99017e-10	3.8091e-09	ENSRNOG00000026857	Kif7	kinesin family member 7 [Source:RGD Symbol;Acc:1310310]
ENSRNOG00000020607	379.996	-0.64491	0.145273	-4.43932	9.02456e-06	5.89594e-05	ENSRNOG00000020607	Bckdha	branched chain keto acid dehydrogenase E1 subunit alpha [Source:RGD Symbol;Acc:2196]
ENSRNOG00000013057	153.024	-0.190987	0.158429	-1.20551	0.228008	0.344045	ENSRNOG00000013057	Prc1	protein regulator of cytokinesis 1 [Source:RGD Symbol;Acc:1311754]
ENSRNOG00000019861	2476.26	0.170024	0.0505753	3.36179	0.000774381	0.00299727	ENSRNOG00000019861	Tollip	toll interacting protein [Source:RGD Symbol;Acc:1304676]
ENSRNOG00000013194	1372.33	0.0093798	0.0473342	0.198161	0.842919	0.896445	ENSRNOG00000013194	Rps6ka2	ribosomal protein S6 kinase A2 [Source:RGD Symbol;Acc:620676]
ENSRNOG00000020906	56.746	-0.384259	0.192374	-1.99746	0.0457751	0.0946923	ENSRNOG00000020906	Pola2	DNA polymerase alpha 2, accessory subunit [Source:RGD Symbol;Acc:621817]
ENSRNOG00000012360	849.801	0.167815	0.076544	2.1924	0.0283505	0.0640381	ENSRNOG00000012360	Gtf2h1	general transcription factor IIH subunit 1 [Source:RGD Symbol;Acc:1308225]
ENSRNOG00000023496	844.813	0.127852	0.0685772	1.86436	0.0622718	0.121694	ENSRNOG00000023496	Entrep2	endosomal transmembrane epsin interactor 2 [Source:RGD Symbol;Acc:1592985]
ENSRNOG00000019178	724.49	-0.132414	0.0612232	-2.1628	0.0305562	0.0679492	ENSRNOG00000019178	Taf10	TATA-box binding protein associated factor 10 [Source:RGD Symbol;Acc:1305907]
ENSRNOG00000014373	855.732	0.211471	0.0799784	2.64411	0.00819069	0.0225478	ENSRNOG00000014373	Trim66	tripartite motif-containing 66 [Source:RGD Symbol;Acc:1595847]
ENSRNOG00000014187	187.699	-0.120462	0.140017	-0.86034	0.389602	0.516841	ENSRNOG00000014187	Igf1r	insulin-like growth factor 1 receptor [Source:RGD Symbol;Acc:2869]
ENSRNOG00000016498	1027.88	0.452279	0.0999621	4.52451	6.0537e-06	4.13011e-05	ENSRNOG00000016498	AABR07004112.1
ENSRNOG00000061795	698.573	0.178459	0.067472	2.64494	0.00817057	0.022509	ENSRNOG00000061795	Rbm4b	RNA binding motif protein 4B [Source:RGD Symbol;Acc:1359343]
ENSRNOG00000019212	2973.03	0.0271242	0.0521963	0.519657	0.603303	0.710666	ENSRNOG00000019212	Tpp1	tripeptidyl peptidase 1 [Source:RGD Symbol;Acc:621296]
ENSRNOG00000020635	333.787	-0.277312	0.150581	-1.84161	0.0655318	0.126756	ENSRNOG00000020635	Exosc5	exosome component 5 [Source:RGD Symbol;Acc:1307861]
ENSRNOG00000017120	1054.98	-0.101388	0.111308	-0.910882	0.362357	0.490316	ENSRNOG00000017120	Abhd2	abhydrolase domain containing 2, acylglycerol lipase [Source:RGD Symbol;Acc:1311389]
ENSRNOG00000020369	651.6	-1.06045	0.140578	-7.54349	4.57565e-14	1.9394e-12	ENSRNOG00000020369	Igf2	insulin-like growth factor 2 [Source:RGD Symbol;Acc:2870]
ENSRNOG00000042059	75.0697	-0.02661	0.170737	-0.155854	0.876148	0.918191	ENSRNOG00000042059	Rccd1	RCC1 domain containing 1 [Source:RGD Symbol;Acc:1309901]
ENSRNOG00000026040	230.504	-0.329142	0.174932	-1.88154	0.0598979	0.117949	ENSRNOG00000026040	Prss53	serine protease 53 [Source:RGD Symbol;Acc:1566127]
ENSRNOG00000012683	704.032	0.168838	0.0860653	1.96174	0.049793	0.101335	ENSRNOG00000012683	Abhd17c	abhydrolase domain containing 17C, depalmitoylase [Source:RGD Symbol;Acc:1308210]
ENSRNOG00000068180	1086.93	-0.0832749	0.099717	-0.835112	0.403654	0.53054	ENSRNOG00000068180	Tmem91	transmembrane protein 91 [Source:RGD Symbol;Acc:2323264]
ENSRNOG00000022822	115.432	-0.0942338	0.15289	-0.616351	0.537663	0.656563	ENSRNOG00000022822	Fam169b	family with sequence similarity 169, member B [Source:RGD Symbol;Acc:1585883]
ENSRNOG00000014565	1046.45	0.113347	0.0660404	1.71633	0.0861013	0.15823	ENSRNOG00000014565	Lcmt1	leucine carboxyl methyltransferase 1 [Source:RGD Symbol;Acc:735118]
ENSRNOG00000019193	9992.55	0.0224167	0.0445052	0.503687	0.614481	0.719986	ENSRNOG00000019193	Stx1b	syntaxin 1B [Source:RGD Symbol;Acc:3784]
ENSRNOG00000024363	141.909	-0.087759	0.137956	-0.636136	0.524688	0.644774	ENSRNOG00000024363	Sertad1	SERTA domain containing 1 [Source:RGD Symbol;Acc:1549778]
ENSRNOG00000060707	1286.25	-0.469271	0.116266	-4.03619	5.43261e-05	0.000291063	ENSRNOG00000060707	Atg2a	autophagy related 2A [Source:RGD Symbol;Acc:1589890]
ENSRNOG00000012357	1174.91	-0.439073	0.106352	-4.12848	3.65175e-05	0.000204138	ENSRNOG00000012357	Unc45a	unc-45 myosin chaperone A [Source:RGD Symbol;Acc:1305357]
ENSRNOG00000024000	85.9841	0.416766	0.291436	1.43005	0.152704	0.250562	ENSRNOG00000024000	Cd22	CD22 molecule [Source:RGD Symbol;Acc:1311610]
ENSRNOG00000016978	34.5693	-0.731192	0.2466	-2.9651	0.00302586	0.00970406	ENSRNOG00000016978	C1h16orf54	similar to human chromosome 16 open reading frame 54 [Source:RGD Symbol;Acc:1564503]
ENSRNOG00000011659	78.8146	-0.0456439	0.19033	-0.239814	0.810474	0.873088	ENSRNOG00000011659	Alpk3	alpha-kinase 3 [Source:RGD Symbol;Acc:1309860]
ENSRNOG00000018928	91.8039	0.00151476	0.163417	0.00926931	0.992604	0.995319	ENSRNOG00000018928	LOC102553760	zinc finger protein 59-like [Source:RGD Symbol;Acc:7588314]
ENSRNOG00000011599	1113.35	-0.370515	0.0863278	-4.29196	1.77104e-05	0.000108099	ENSRNOG00000011599	Gldc	glycine decarboxylase [Source:RGD Symbol;Acc:1308660]
ENSRNOG00000050282	2641.78	-0.252149	0.0659636	-3.82254	0.000132082	0.000637561	ENSRNOG00000050282	Srcap	Snf2-related CREBBP activator protein [Source:RGD Symbol;Acc:1565642]
ENSRNOG00000024245	94.6579	-0.101638	0.176713	-0.575158	0.565185	0.678748	ENSRNOG00000024245	Zkscan2	zinc finger with KRAB and SCAN domains 2 [Source:RGD Symbol;Acc:1359568]
ENSRNOG00000054506	21.9538	-1.01841	0.368281	-2.76531	0.00568688	0.0165804	ENSRNOG00000054506	Nccrp1	NCCRP1, F-box associated domain containing [Source:RGD Symbol;Acc:1305932]
ENSRNOG00000020835	497.385	-0.343081	0.0960306	-3.57263	0.000353419	0.00150553	ENSRNOG00000020835	Hipk4	homeodomain interacting protein kinase 4 [Source:RGD Symbol;Acc:1307541]
ENSRNOG00000043007	192.047	-0.617074	0.147565	-4.18171	2.89324e-05	0.000166595	ENSRNOG00000043007	Rcn3	reticulocalbin 3 [Source:RGD Symbol;Acc:1359365]
ENSRNOG00000012442	84.0244	-0.170438	0.174986	-0.974008	0.330053	0.457815	ENSRNOG00000012442	Cemip	cell migration inducing hyaluronidase 1 [Source:RGD Symbol;Acc:1305254]
ENSRNOG00000014513	33.6184	0.118066	0.280655	0.420681	0.673988	0.770299	ENSRNOG00000014513	Rexo5	RNA exonuclease 5 [Source:RGD Symbol;Acc:1305412]
ENSRNOG00000018158	1012.74	0.204085	0.0648474	3.14715	0.0016487	0.00577302	ENSRNOG00000018158	Tmem181	transmembrane protein 181 [Source:RGD Symbol;Acc:1566403]
ENSRNOG00000021106	1454.13	-0.435986	0.105911	-4.11652	3.8463e-05	0.000213575	ENSRNOG00000021106	Gramd1a	GRAM domain containing 1A [Source:RGD Symbol;Acc:1311022]
ENSRNOG00000015540	1558.17	-0.112298	0.0543054	-2.06789	0.0386501	0.0823932	ENSRNOG00000015540	Ppp6r3	protein phosphatase 6, regulatory subunit 3 [Source:RGD Symbol;Acc:1307145]
ENSRNOG00000021108	50.9825	-0.571304	0.216654	-2.63694	0.00836573	0.0229493	ENSRNOG00000021108	Slc22a12	solute carrier family 22 member 12 [Source:RGD Symbol;Acc:621628]
ENSRNOG00000050104	7282.82	0.114097	0.0428787	2.66092	0.00779265	0.0216474	ENSRNOG00000050104	Clip3	CAP-GLY domain containing linker protein 3 [Source:RGD Symbol;Acc:1306245]
ENSRNOG00000018390	3719.25	-0.152196	0.0958666	-1.58758	0.11238	0.197098	ENSRNOG00000018390	Pld3	phospholipase D family, member 3 [Source:RGD Symbol;Acc:1308248]
ENSRNOG00000021484	136.582	-0.0225508	0.163059	-0.138298	0.890005	0.927029	ENSRNOG00000021484	Rhoq-ps1	ras homolog family member Q, pseudogene 1 [Source:RGD Symbol;Acc:6491275]
ENSRNOG00000018683	1020.88	-0.492616	0.0774169	-6.36316	1.97639e-10	3.79244e-09	ENSRNOG00000018683	Dock1	dedicator of cyto-kinesis 1 [Source:RGD Symbol;Acc:1566072]
ENSRNOG00000020583	695.425	-0.484599	0.0864851	-5.60327	2.10347e-08	2.60935e-07	ENSRNOG00000020583	Fcgrt	Fc gamma receptor and transporter [Source:RGD Symbol;Acc:61811]
ENSRNOG00000050828	292.742	0.0519089	0.0976223	0.531732	0.594912	0.703039	ENSRNOG00000050828	Vkorc1	vitamin K epoxide reductase complex, subunit 1 [Source:RGD Symbol;Acc:1303107]
ENSRNOG00000018385	1096.05	-0.0575264	0.0954533	-0.602666	0.546731	0.663894	ENSRNOG00000018385	Chrm1	cholinergic receptor, muscarinic 1 [Source:RGD Symbol;Acc:2342]
ENSRNOG00000025216	271.094	-0.289893	0.113363	-2.55722	0.0105512	0.0279644	ENSRNOG00000025216	Alkbh6	alkB homolog 6 [Source:RGD Symbol;Acc:1566318]
ENSRNOG00000026408	127.439	0.359467	0.164439	2.18602	0.0288143	0.0648649	ENSRNOG00000026408	Rnf169	ring finger protein 169 [Source:RGD Symbol;Acc:1583288]
ENSRNOG00000015518	1077.73	0.219713	0.0819277	2.68179	0.00732293	0.0205179	ENSRNOG00000015518	Rbp4	retinol binding protein 4 [Source:RGD Symbol;Acc:3546]
ENSRNOG00000023274	531.777	0.117626	0.097567	1.20559	0.227977	0.344045	ENSRNOG00000023274	Lrrc28	leucine rich repeat containing 28 [Source:RGD Symbol;Acc:1307209]
ENSRNOG00000019666	1868.02	-0.25816	0.0750053	-3.44189	0.000577661	0.00231871	ENSRNOG00000019666	Ubxn1	UBX domain protein 1 [Source:RGD Symbol;Acc:1309471]
ENSRNOG00000049277	45.2522	-0.332868	0.250705	-1.32773	0.184268	0.291013	ENSRNOG00000049277	Syne4	spectrin repeat containing nuclear envelope family member 4 [Source:RGD Symbol;Acc:1304580]
ENSRNOG00000020527	1225.38	0.0184767	0.0648738	0.28481	0.77579	0.846645	ENSRNOG00000020527	Drap1	Dr1 associated protein 1 [Source:RGD Symbol;Acc:1308477]
ENSRNOG00000018207	214.351	-0.17648	0.104353	-1.69118	0.090803	0.165406	ENSRNOG00000018207	Dynlt1	dynein light chain Tctex-type 1 [Source:RGD Symbol;Acc:620261]
ENSRNOG00000033881	120.004	0.898041	0.165651	5.42127	5.91769e-08	6.67101e-07	ENSRNOG00000033881	Insyn2a	inhibitory synaptic factor 2A [Source:RGD Symbol;Acc:2302685]
ENSRNOG00000016358	1042.43	-0.281554	0.0715973	-3.93247	8.4077e-05	0.000426173	ENSRNOG00000016358	Apba2	amyloid beta precursor protein binding family A member 2 [Source:RGD Symbol;Acc:620845]
ENSRNOG00000026527	896.418	-0.220532	0.0775715	-2.84296	0.00446973	0.0135305	ENSRNOG00000026527	Snx32	sorting nexin 32 [Source:RGD Symbol;Acc:1560591]
ENSRNOG00000019725	5223.37	-0.0621969	0.0413343	-1.50473	0.132394	0.223619	ENSRNOG00000019725	Actr1a	actin related protein 1A [Source:RGD Symbol;Acc:1307025]
ENSRNOG00000019982	261.71	-0.00114248	0.0963706	-0.0118551	0.990541	0.994381	ENSRNOG00000019982	Ethe1	ETHE1, persulfide dioxygenase [Source:RGD Symbol;Acc:1311034]
ENSRNOG00000045568	796.028	0.170088	0.0818494	2.07806	0.0377039	0.0806984	ENSRNOG00000045568	Rbm14	RNA binding motif protein 14 [Source:RGD Symbol;Acc:620542]
ENSRNOG00000016728	1710.94	0.0772479	0.0764762	1.01009	0.312452	0.43958	ENSRNOG00000016728	Tiam2	TIAM Rac1 associated GEF 2 [Source:RGD Symbol;Acc:2324148]
ENSRNOG00000036649	522.172	-0.0123568	0.0943369	-0.130986	0.895787	0.931105	ENSRNOG00000036649	Pwwp2b	PWWP domain containing 2B [Source:RGD Symbol;Acc:1307108]
ENSRNOG00000045561	327.837	-0.366664	0.114048	-3.21499	0.00130449	0.00470094	ENSRNOG00000045561	Uqcc3	ubiquinol-cytochrome c reductase complex assembly factor 3 [Source:RGD Symbol;Acc:1597344]
ENSRNOG00000020595	5862.52	-0.19301	0.0462965	-4.169	3.05933e-05	0.000175348	ENSRNOG00000020595	Rps11	ribosomal protein S11 [Source:RGD Symbol;Acc:621026]
ENSRNOG00000018674	882.279	0.0507274	0.0704468	0.72008	0.471476	0.596296	ENSRNOG00000018674	Ntrk3	neurotrophic receptor tyrosine kinase 3 [Source:RGD Symbol;Acc:3214]
ENSRNOG00000020389	52.4638	-0.602166	0.237169	-2.53897	0.011118	0.0292492	ENSRNOG00000020389	Capn12	calpain 12 [Source:RGD Symbol;Acc:1307341]
ENSRNOG00000018322	5737.01	0.379286	0.0649488	5.83977	5.22733e-09	7.46305e-08	ENSRNOG00000018322	Picalm	phosphatidylinositol binding clathrin assembly protein [Source:RGD Symbol;Acc:621054]
ENSRNOG00000019920	47.5318	-0.25842	0.268915	-0.960973	0.336566	0.464585	ENSRNOG00000019920	Doc2a	double C2 domain alpha [Source:RGD Symbol;Acc:620518]
ENSRNOG00000020839	217.596	-0.500089	0.169327	-2.95339	0.00314308	0.0100155	ENSRNOG00000020839	Lrfn3	leucine rich repeat and fibronectin type III domain containing 3 [Source:RGD Symbol;Acc:1305567]
ENSRNOG00000064232	118.8	-0.190015	0.137576	-1.38116	0.16723	0.269544	ENSRNOG00000064232	LOC103691238	zinc finger protein 239-like [Source:RGD Symbol;Acc:9074604]
ENSRNOG00000050180	439.143	-0.124248	0.0891229	-1.39412	0.163282	0.264779	ENSRNOG00000050180	Zfpl1	zinc finger protein-like 1 [Source:RGD Symbol;Acc:1586738]
ENSRNOG00000019675	72.7051	0.0402848	0.205732	0.195813	0.844757	0.897686	ENSRNOG00000019675	Pycard	PYD and CARD domain containing [Source:RGD Symbol;Acc:628637]
ENSRNOG00000020551	862.678	0.0146287	0.081468	0.179564	0.857495	0.905779	ENSRNOG00000020551	Bles03	basophilic leukemia expressed protein BLES03 [Source:RGD Symbol;Acc:628612]
ENSRNOG00000047756	1430.35	0.720093	0.100685	7.15191	8.55787e-13	2.72177e-11	ENSRNOG00000047756	Mef2a	myocyte enhancer factor 2a [Source:RGD Symbol;Acc:1359360]
ENSRNOG00000066875	204.547	0.206116	0.115627	1.7826	0.074652	0.141164	ENSRNOG00000066875	Dcun1d3	defective in cullin neddylation 1 domain containing 3 [Source:RGD Symbol;Acc:1308893]
ENSRNOG00000018962	55.7174	-0.413604	0.207878	-1.98965	0.0466295	0.0960345	ENSRNOG00000018962	Ctf1	cardiotrophin 1 [Source:RGD Symbol;Acc:2442]
ENSRNOG00000014486	122.148	0.0697299	0.186642	0.373602	0.7087	0.797775	ENSRNOG00000014486	Rfx3	regulatory factor X3 [Source:RGD Symbol;Acc:1307779]
ENSRNOG00000024793	314.998	0.263175	0.0978641	2.68918	0.00716269	0.0201369	ENSRNOG00000024793	Kctd21	potassium channel tetramerization domain containing 21 [Source:RGD Symbol;Acc:1559529]
ENSRNOG00000056223	276.665	0.235004	0.102129	2.30105	0.0213888	0.0505406	ENSRNOG00000056223	Tfb1m	transcription factor B1, mitochondrial [Source:RGD Symbol;Acc:727795]
ENSRNOG00000012292	164.23	-0.0775093	0.137183	-0.565005	0.57207	0.684433	ENSRNOG00000012292	Alg8	ALG8, alpha-1,3-glucosyltransferase [Source:RGD Symbol;Acc:1305468]
ENSRNOG00000020433	3745.11	-0.251144	0.0691499	-3.63188	0.000281365	0.00123592	ENSRNOG00000020433	Actn4	actinin alpha 4 [Source:RGD Symbol;Acc:61816]
ENSRNOG00000020618	10121.6	-0.414702	0.0770722	-5.3807	7.41971e-08	8.26452e-07	ENSRNOG00000020618	Rpl13a	ribosomal protein L13A [Source:RGD Symbol;Acc:628697]
ENSRNOG00000012698	503.728	0.27824	0.0954637	2.91461	0.00356133	0.011144	ENSRNOG00000012698	Chsy1	chondroitin sulfate synthase 1 [Source:RGD Symbol;Acc:1311904]
ENSRNOG00000050741	22.1595	-0.65663	0.321938	-2.03962	0.0413885	0.0872848	ENSRNOG00000050741	Rbm4	RNA binding motif protein 4 [Source:RGD Symbol;Acc:1306891]
ENSRNOG00000010775	202.984	-0.0902373	0.109568	-0.823574	0.410182	0.53648	ENSRNOG00000010775	Arrdc4	arrestin domain containing 4 [Source:RGD Symbol;Acc:1311763]
ENSRNOG00000019935	797.041	-0.65029	0.125104	-5.19798	2.01469e-07	2.01039e-06	ENSRNOG00000019935	Armc5	armadillo repeat containing 5 [Source:RGD Symbol;Acc:1306553]
ENSRNOG00000012383	1690.22	0.082263	0.0601531	1.36756	0.17145	0.274973	ENSRNOG00000012383	Ndufc2	NADH:ubiquinone oxidoreductase subunit C2 [Source:RGD Symbol;Acc:1307511]
ENSRNOG00000026296	23.1102	0.256456	0.327314	0.783515	0.433324	0.5595	ENSRNOG00000026296	Saxo2	stabilizer of axonemal microtubules 2 [Source:RGD Symbol;Acc:1562653]
ENSRNOG00000019960	814.47	-0.393932	0.0846525	-4.65351	3.26326e-06	2.40055e-05	ENSRNOG00000019960	Ino80e	INO80 complex subunit E [Source:RGD Symbol;Acc:1359572]
ENSRNOG00000012404	638.084	-0.685567	0.117752	-5.82211	5.81106e-09	8.24134e-08	ENSRNOG00000012404	Thrsp	thyroid hormone responsive [Source:RGD Symbol;Acc:3859]
ENSRNOG00000046333	3426.8	-0.143582	0.0710597	-2.02058	0.0433233	0.090649	ENSRNOG00000046333	Ablim1	actin-binding LIM protein 1 [Source:RGD Symbol;Acc:1565768]
ENSRNOG00000019461	128.516	0.0818546	0.132849	0.616148	0.537797	0.656619	ENSRNOG00000019461	Zbtb3	zinc finger and BTB domain containing 3 [Source:RGD Symbol;Acc:1561140]
ENSRNOG00000012494	67.5975	-0.399033	0.181847	-2.19434	0.0282111	0.063773	ENSRNOG00000012494	Kctd14	potassium channel tetramerization domain containing 14 [Source:RGD Symbol;Acc:1306430]
ENSRNOG00000050624	511.975	0.120499	0.0889983	1.35395	0.175753	0.280559	ENSRNOG00000050624	Lysmd4	LysM domain containing 4 [Source:RGD Symbol;Acc:1592887]
ENSRNOG00000016751	1279.86	-0.15289	0.0867306	-1.76281	0.0779325	0.146147	ENSRNOG00000016751	Slc25a28	solute carrier family 25 member 28 [Source:RGD Symbol;Acc:1584155]
ENSRNOG00000019077	716.67	0.191646	0.0822412	2.33029	0.0197909	0.0473563	ENSRNOG00000019077	Lipa	lipase A, lysosomal acid type [Source:RGD Symbol;Acc:3008]
ENSRNOG00000014862	107.037	0.278184	0.186127	1.49459	0.13502	0.227156	ENSRNOG00000014862	Gabrg3	gamma-aminobutyric acid type A receptor subunit gamma 3 [Source:RGD Symbol;Acc:621735]
ENSRNOG00000013017	1954.43	0.0309637	0.0741173	0.417766	0.676118	0.771851	ENSRNOG00000013017	Arnt2	aryl hydrocarbon receptor nuclear translocator 2 [Source:RGD Symbol;Acc:2154]
ENSRNOG00000036604	162.975	0.445992	0.238463	1.87027	0.0614458	0.120395	ENSRNOG00000036604	Ifit2	interferon-induced protein with tetratricopeptide repeats 2 [Source:RGD Symbol;Acc:1307804]
ENSRNOG00000019439	713.143	0.14192	0.0833035	1.70365	0.0884474	0.161749	ENSRNOG00000019439	Polr2g	RNA polymerase II subunit G [Source:RGD Symbol;Acc:621284]
ENSRNOG00000017195	1651.05	-0.0524836	0.0544487	-0.963909	0.335092	0.463234	ENSRNOG00000017195	Ctr9	CTR9 homolog, Paf1/RNA polymerase II complex component [Source:RGD Symbol;Acc:1311097]
ENSRNOG00000016603	1879.37	-0.512042	0.0963384	-5.31504	1.06635e-07	1.14263e-06	ENSRNOG00000016603	Rtn2	reticulon 2 [Source:RGD Symbol;Acc:1303245]
ENSRNOG00000065273	491.649	-0.29357	0.0925127	-3.1733	0.00150717	0.00534375	ENSRNOG00000065273	LOC103691165	uncharacterized LOC103691165 [Source:RGD Symbol;Acc:9322177]
ENSRNOG00000018987	927.065	0.39917	0.0922404	4.32749	1.50816e-05	9.39724e-05	ENSRNOG00000018987	Crebzf	CREB/ATF bZIP transcription factor [Source:RGD Symbol;Acc:1565584]
ENSRNOG00000027374	177.984	-0.69076	0.150735	-4.58262	4.59187e-06	3.23618e-05	ENSRNOG00000027374	Cfap46	cilia and flagella associated protein 46 [Source:RGD Symbol;Acc:1559985]
ENSRNOG00000022748	66.5647	0.307465	0.200401	1.53425	0.124969	0.213612	ENSRNOG00000022748	Tmem126a	transmembrane protein 126A [Source:RGD Symbol;Acc:1305677]
ENSRNOG00000016689	82.3409	-0.245861	0.163116	-1.50728	0.13174	0.222791	ENSRNOG00000016689	Fanci	FA complementation group I [Source:RGD Symbol;Acc:2321863]
ENSRNOG00000018929	38.9597	-0.104976	0.278915	-0.376372	0.70664	0.796656	ENSRNOG00000018929	Kif20b	kinesin family member 20B [Source:RGD Symbol;Acc:1308497]
ENSRNOG00000020623	416.124	-0.441475	0.121866	-3.62263	0.00029162	0.00127498	ENSRNOG00000020623	Aldh16a1	aldehyde dehydrogenase 16 family, member A1 [Source:RGD Symbol;Acc:1566295]
ENSRNOG00000018487	3152.67	-0.267807	0.057234	-4.67916	2.88058e-06	2.15402e-05	ENSRNOG00000018487	Slc3a2	solute carrier family 3 member 2 [Source:RGD Symbol;Acc:3073]
ENSRNOG00000019701	278.304	-0.10073	0.0994996	-1.01236	0.311366	0.438505	ENSRNOG00000019701	C1h11orf98	similar to human chromosome 11 open reading frame 98 [Source:RGD Symbol;Acc:1597339]
ENSRNOG00000022386	8223.29	-0.0774402	0.0970004	-0.798349	0.424668	0.551132	ENSRNOG00000022386	Opalin	oligodendrocytic myelin paranodal and inner loop protein [Source:RGD Symbol;Acc:1307776]
ENSRNOG00000033733	144.509	-0.36451	0.16032	-2.27364	0.0229879	0.0537219	ENSRNOG00000033733	Ccdc81	coiled-coil domain containing 81 [Source:RGD Symbol;Acc:1306766]
ENSRNOG00000026005	452.982	-0.305785	0.100907	-3.03035	0.00244271	0.00807109	ENSRNOG00000026005	Ints5	integrator complex subunit 5 [Source:RGD Symbol;Acc:1309370]
ENSRNOG00000060269	25.5506	-0.165087	0.305628	-0.540155	0.58909	0.698756	ENSRNOG00000060269	Vwce	von Willebrand factor C and EGF domains [Source:RGD Symbol;Acc:1309910]
ENSRNOG00000032293	673.173	-0.157505	0.0888401	-1.77291	0.0762444	0.143557	ENSRNOG00000032293	Polg	DNA polymerase gamma, catalytic subunit [Source:RGD Symbol;Acc:620057]
ENSRNOG00000020354	518.618	-0.0300109	0.0767002	-0.391275	0.695594	0.787648	ENSRNOG00000020354	Mrpl23	mitochondrial ribosomal protein L23 [Source:RGD Symbol;Acc:68343]
ENSRNOG00000024530	303.998	0.122835	0.113227	1.08485	0.277987	0.401833	ENSRNOG00000024530	Lyrm1	LYR motif containing 1 [Source:RGD Symbol;Acc:1563498]
ENSRNOG00000015003	404.23	-0.175783	0.158308	-1.11039	0.266831	0.38932	ENSRNOG00000015003	Pex11a	peroxisomal biogenesis factor 11 alpha [Source:RGD Symbol;Acc:619842]
ENSRNOG00000018725	918.229	-0.16841	0.100298	-1.67909	0.093134	0.168911	ENSRNOG00000018725	Phkg2	phosphorylase kinase catalytic subunit gamma 2 [Source:RGD Symbol;Acc:620024]
ENSRNOG00000055401	1014.04	0.336974	0.0860033	3.91815	8.92318e-05	0.000450316	ENSRNOG00000055401	Kcnc1	potassium voltage-gated channel subfamily C member 1 [Source:RGD Symbol;Acc:2955]
ENSRNOG00000054955	361.065	0.207849	0.109743	1.89395	0.0582312	0.115259	ENSRNOG00000054955	Adgra1	adhesion G protein-coupled receptor A1 [Source:RGD Symbol;Acc:1308241]
ENSRNOG00000070964	105.964	-0.00814145	0.162813	-0.0500048	0.960119	0.974451	ENSRNOG00000070964	Cc2d2b	coiled-coil and C2 domain containing 2B [Source:RGD Symbol;Acc:1310408]
ENSRNOG00000033744	52.1966	-0.160305	0.207754	-0.771608	0.440346	0.566658	ENSRNOG00000033744	Rasgrp4	RAS guanyl releasing protein 4 [Source:RGD Symbol;Acc:620476]
ENSRNOG00000014783	275.389	-0.583094	0.10022	-5.81813	5.95091e-09	8.42369e-08	ENSRNOG00000014783	Pgghg	protein-glucosylgalactosylhydroxylysine glucosidase [Source:RGD Symbol;Acc:1306015]
ENSRNOG00000020634	193.079	-0.149131	0.128166	-1.16358	0.244596	0.362864	ENSRNOG00000020634	Pih1d1	PIH1 domain containing 1 [Source:RGD Symbol;Acc:1309809]
ENSRNOG00000050426	123.357	0.0714204	0.201518	0.354412	0.72303	0.809153	ENSRNOG00000050426	Dnah3	dynein, axonemal, heavy chain 3 [Source:RGD Symbol;Acc:1305855]
ENSRNOG00000019724	4184.44	-0.0391815	0.0426299	-0.919109	0.358038	0.485879	ENSRNOG00000019724	Ganab	glucosidase II alpha subunit [Source:RGD Symbol;Acc:1309775]
ENSRNOG00000016496	170.717	0.0219107	0.131008	0.167247	0.867176	0.912855	ENSRNOG00000016496	Ctsc	cathepsin C [Source:RGD Symbol;Acc:2445]
ENSRNOG00000048733	733.777	-0.0103775	0.0650958	-0.159418	0.873339	0.916338	ENSRNOG00000048733	Nup62	nucleoporin 62 [Source:RGD Symbol;Acc:619938]
ENSRNOG00000022839	96.9663	0.192534	0.538437	0.35758	0.720658	0.807313	ENSRNOG00000022839	Ifit3	interferon-induced protein with tetratricopeptide repeats 3 [Source:RGD Symbol;Acc:1359681]
ENSRNOG00000025142	150.332	0.131236	0.175489	0.747829	0.454563	0.580535	ENSRNOG00000025142	Mex3b	mex-3 RNA binding family member B [Source:RGD Symbol;Acc:1306790]
ENSRNOG00000067262	931.631	0.0220724	0.0712919	0.309607	0.75686	0.833343	ENSRNOG00000067262	Aldh18a1	aldehyde dehydrogenase 18 family, member A1 [Source:RGD Symbol;Acc:1311431]
ENSRNOG00000025052	251.193	0.292496	0.117698	2.48514	0.0129501	0.0333123	ENSRNOG00000025052	Stard5	StAR-related lipid transfer domain containing 5 [Source:RGD Symbol;Acc:1561783]
ENSRNOG00000018815	56.6012	-0.276383	0.235581	-1.1732	0.240716	0.358253	ENSRNOG00000018815	Plk1	polo-like kinase 1 [Source:RGD Symbol;Acc:3352]
ENSRNOG00000020726	448.954	-0.95505	0.150246	-6.35657	2.06307e-10	3.93352e-09	ENSRNOG00000020726	Sipa1	signal-induced proliferation-associated 1 [Source:RGD Symbol;Acc:1303184]
ENSRNOG00000053015	122.185	-0.0442055	0.156036	-0.283304	0.776944	0.847349	ENSRNOG00000053015	Cfap119	cilia and flagella associated protein 119 [Source:RGD Symbol;Acc:1593368]
ENSRNOG00000020650	118.94	0.100503	0.35868	0.280203	0.779322	0.849322	ENSRNOG00000020650	Slc17a7	solute carrier family 17 member 7 [Source:RGD Symbol;Acc:620101]
ENSRNOG00000019245	264.499	0.0203811	0.0974097	0.209231	0.834268	0.8905	ENSRNOG00000019245	Sgf29	SAGA complex associated factor 29 [Source:RGD Symbol;Acc:1310609]
ENSRNOG00000011680	107.622	-0.551686	0.168023	-3.28339	0.00102566	0.00381381	ENSRNOG00000011680	Il16	interleukin 16 [Source:RGD Symbol;Acc:1583872]
ENSRNOG00000036603	31.1069	0.624305	0.30343	2.05749	0.039639	0.0841414	ENSRNOG00000036603	Ifit1bl	interferon-induced protein with tetratricopeptide repeats 1B-like [Source:RGD Symbol;Acc:1304872]
ENSRNOG00000020430	1457.06	0.15785	0.0587992	2.68456	0.00726248	0.0203753	ENSRNOG00000020430	Wdr11	WD repeat domain 11 [Source:RGD Symbol;Acc:1587347]
ENSRNOG00000017619	624.97	-0.553098	0.153378	-3.60612	0.000310812	0.0013498	ENSRNOG00000017619	Aldh1a1	aldehyde dehydrogenase 1 family, member A1 [Source:RGD Symbol;Acc:2087]
ENSRNOG00000018163	216.926	0.145162	0.142797	1.01656	0.309363	0.43659	ENSRNOG00000018163	Ipcef1	interaction protein for cytohesin exchange factors 1 [Source:RGD Symbol;Acc:735159]
ENSRNOG00000017850	123.24	-0.153867	0.156033	-0.986118	0.324075	0.452144	ENSRNOG00000017850	Dctpp1	dCTP pyrophosphatase 1 [Source:RGD Symbol;Acc:620933]
ENSRNOG00000015078	251.169	0.0551487	0.135209	0.407879	0.683363	0.777745	ENSRNOG00000015078	Ifitm3	interferon induced transmembrane protein 3 [Source:RGD Symbol;Acc:1595844]
ENSRNOG00000020505	80.6119	-0.26505	0.181552	-1.45991	0.144315	0.239345	ENSRNOG00000020505	Map4k1	mitogen activated protein kinase kinase kinase kinase 1 [Source:RGD Symbol;Acc:1305463]
ENSRNOG00000014936	173.01	-0.234119	0.163163	-1.43488	0.15132	0.248701	ENSRNOG00000014936	Ifitm2	interferon induced transmembrane protein 2 [Source:RGD Symbol;Acc:69332]
ENSRNOG00000018052	569.592	-0.233605	0.107924	-2.16454	0.0304228	0.0676826	ENSRNOG00000018052	Cnksr3	Cnksr family member 3 [Source:RGD Symbol;Acc:1307544]
ENSRNOG00000019050	68.9531	0.728541	0.830086	0.87767	0.380123	0.507555	ENSRNOG00000019050	Ifit1	interferon-induced protein with tetratricopeptide repeats 1 [Source:RGD Symbol;Acc:620599]
ENSRNOG00000022321	24.6154	-1.02869	0.33512	-3.06961	0.00214337	0.0072434	ENSRNOG00000022321	Hapln3	hyaluronan and proteoglycan link protein 3 [Source:RGD Symbol;Acc:1308098]
ENSRNOG00000020191	1205.38	-0.320823	0.112527	-2.85107	0.00435723	0.0132194	ENSRNOG00000020191	Tbc1d17	TBC1 domain family, member 17 [Source:RGD Symbol;Acc:1309686]
ENSRNOG00000018042	1519.74	0.0612791	0.0802016	0.764063	0.44483	0.571198	ENSRNOG00000018042	Mrpl48	mitochondrial ribosomal protein L48 [Source:RGD Symbol;Acc:1307576]
ENSRNOG00000020903	454.82	-0.173083	0.0880997	-1.96463	0.0494575	0.100803	ENSRNOG00000020903	Lto1	LTO1 maturation factor of ABCE1 [Source:RGD Symbol;Acc:1304637]
ENSRNOG00000018840	578.347	-0.559265	0.131637	-4.24853	2.15179e-05	0.000128147	ENSRNOG00000018840	Rnf40	ring finger protein 40 [Source:RGD Symbol;Acc:628638]
ENSRNOG00000018391	384.251	-0.0500307	0.112938	-0.44299	0.657773	0.757911	ENSRNOG00000018391	Cdk2ap2	cyclin-dependent kinase 2 associated protein 2 [Source:RGD Symbol;Acc:1588883]
ENSRNOG00000020289	852.294	-0.349505	0.110181	-3.1721	0.00151338	0.00536449	ENSRNOG00000020289	Akt1s1	AKT1 substrate 1 [Source:RGD Symbol;Acc:1312049]
ENSRNOG00000017227	2522.49	0.0819416	0.05515	1.48579	0.137333	0.230445	ENSRNOG00000017227	Ppme1	protein phosphatase methylesterase 1 [Source:RGD Symbol;Acc:1309683]
ENSRNOG00000020851	38896.4	-0.149187	0.0575318	-2.59313	0.00951079	0.0255651	ENSRNOG00000020851	Aplp1	amyloid beta precursor like protein 1 [Source:RGD Symbol;Acc:69257]
ENSRNOG00000011068	471.596	-0.447773	0.103719	-4.31715	1.58055e-05	9.80335e-05	ENSRNOG00000011068	Papss2	3'-phosphoadenosine 5'-phosphosulfate synthase 2 [Source:RGD Symbol;Acc:1307012]
ENSRNOG00000043141	899.811	0.011919	0.0671528	0.177491	0.859123	0.906997	ENSRNOG00000043141	Ap3s2	adaptor related protein complex 3 subunit sigma 2 [Source:RGD Symbol;Acc:1586888]
ENSRNOG00000015088	941.257	0.557996	0.112613	4.95499	7.23341e-07	6.31941e-06	ENSRNOG00000015088	Prune2	prune homolog 2 with BCH domain [Source:RGD Symbol;Acc:1311350]
ENSRNOG00000064647	1811.64	-0.15859	0.0540508	-2.93408	0.00334537	0.0105722	ENSRNOG00000064647	Echs1	enoyl-CoA hydratase, short chain 1 [Source:RGD Symbol;Acc:69330]
ENSRNOG00000017114	688.646	-0.0172192	0.103728	-0.166004	0.868154	0.913049	ENSRNOG00000017114	Synj2	synaptojanin 2 [Source:RGD Symbol;Acc:69436]
ENSRNOG00000060008	678.319	0.00253537	0.0684697	0.037029	0.970462	0.981825	ENSRNOG00000060008	Cog7	component of oligomeric golgi complex 7 [Source:RGD Symbol;Acc:1566058]
ENSRNOG00000018176	8044.22	0.561414	0.0740372	7.58287	3.38003e-14	1.47302e-12	ENSRNOG00000018176	Rab6a	RAB6A, member RAS oncogene family [Source:RGD Symbol;Acc:619737]
ENSRNOG00000021724	31.7861	0.0389995	0.309984	0.125811	0.899882	0.933782	ENSRNOG00000021724	Ptprcap	protein tyrosine phosphatase, receptor type, C-associated protein [Source:RGD Symbol;Acc:1559601]
ENSRNOG00000060693	39.1816	-0.317818	0.302267	-1.05145	0.293054	0.418472	ENSRNOG00000060693	Catsperg	cation channel sperm associated auxiliary subunit gamma [Source:RGD Symbol;Acc:1310942]
ENSRNOG00000051256	212.398	-0.175781	0.10731	-1.63806	0.101408	0.181246	ENSRNOG00000051256	R3hcc1l	R3H domain and coiled-coil containing 1-like [Source:RGD Symbol;Acc:1307934]
ENSRNOG00000027228	58.2348	-0.0419964	0.200838	-0.209105	0.834366	0.8905	ENSRNOG00000027228	Mogat2	monoacylglycerol O-acyltransferase 2 [Source:RGD Symbol;Acc:1598060]
ENSRNOG00000029061	725.399	0.0246566	0.070168	0.351394	0.725293	0.810775	ENSRNOG00000029061	Hirip3	HIRA interacting protein 3 [Source:RGD Symbol;Acc:1306463]
ENSRNOG00000018838	478.141	-0.226588	0.0767088	-2.95387	0.0031382	0.0100042	ENSRNOG00000018838	Paox	polyamine oxidase [Source:RGD Symbol;Acc:1561125]
ENSRNOG00000017222	715.755	0.206517	0.0792254	2.6067	0.00914202	0.0247431	ENSRNOG00000017222	Abraxas2	abraxas 2, BRISC complex subunit [Source:RGD Symbol;Acc:1308918]
ENSRNOG00000020918	494.905	-0.421424	0.0967056	-4.35781	1.31373e-05	8.32806e-05	ENSRNOG00000020918	Ccnd1	cyclin D1 [Source:RGD Symbol;Acc:68384]
ENSRNOG00000017889	390.606	0.16889	0.0884517	1.9094	0.0562099	0.111881	ENSRNOG00000017889	Serac1	serine active site containing 1 [Source:RGD Symbol;Acc:1565064]
ENSRNOG00000014589	187.719	-0.0415412	0.123366	-0.33673	0.73632	0.818376	ENSRNOG00000014589	Arpin	actin-related protein 2/3 complex inhibitor [Source:RGD Symbol;Acc:1311021]
ENSRNOG00000017608	639.86	-0.110992	0.0813495	-1.36438	0.172447	0.276197	ENSRNOG00000017608	C2cd3	C2 domain containing 3 centriole elongation regulator [Source:RGD Symbol;Acc:1307366]
ENSRNOG00000020864	67.0756	-0.04296	0.184616	-0.232699	0.815995	0.877306	ENSRNOG00000020864	Kirrel2	kirre like nephrin family adhesion molecule 2 [Source:RGD Symbol;Acc:1308456]
ENSRNOG00000023360	4580.33	-0.0346698	0.0590739	-0.586888	0.557279	0.67255	ENSRNOG00000023360	Fus	Fus RNA binding protein [Source:RGD Symbol;Acc:1308864]
ENSRNOG00000019873	2429.12	-0.293201	0.0751456	-3.90178	9.54894e-05	0.000477513	ENSRNOG00000019873	B3gat3	beta-1,3-glucuronyltransferase 3 [Source:RGD Symbol;Acc:1311968]
ENSRNOG00000030888	785.924	-0.366005	0.0760146	-4.81493	1.47248e-06	1.18977e-05	ENSRNOG00000030888	Rela	RELA proto-oncogene, NF-kB subunit [Source:RGD Symbol;Acc:727889]
ENSRNOG00000011683	111.929	-0.0917781	0.181871	-0.504634	0.613816	0.719484	ENSRNOG00000011683	Fes	FES proto-oncogene, tyrosine kinase [Source:RGD Symbol;Acc:1564385]
ENSRNOG00000018599	477.22	0.0313006	0.072804	0.42993	0.667247	0.76509	ENSRNOG00000018599	Gga2	golgi associated, gamma adaptin ear containing, ARF binding protein 2 [Source:RGD Symbol;Acc:1304800]
ENSRNOG00000021689	949.572	-0.356208	0.116444	-3.05904	0.00222046	0.00745874	ENSRNOG00000021689	Rps6kb2	ribosomal protein S6 kinase B2 [Source:RGD Symbol;Acc:1305144]
ENSRNOG00000024036	563.791	-0.316699	0.160647	-1.9714	0.0486785	0.0994733	ENSRNOG00000024036	Fam98c	family with sequence similarity 98, member C [Source:RGD Symbol;Acc:1303117]
ENSRNOG00000015727	24.8112	0.239699	0.346499	0.691773	0.48908	0.612609	ENSRNOG00000015727	Loxl4	lysyl oxidase-like 4 [Source:RGD Symbol;Acc:1308588]
ENSRNOG00000024625	304.046	-0.155887	0.0956597	-1.62959	0.103187	0.183843	ENSRNOG00000024625	Proser3	proline and serine rich 3 [Source:RGD Symbol;Acc:1565712]
ENSRNOG00000011352	890.024	-0.307	0.103253	-2.97327	0.00294645	0.00948805	ENSRNOG00000011352	Furin	furin (paired basic amino acid cleaving enzyme) [Source:RGD Symbol;Acc:3274]
ENSRNOG00000017725	175.049	-1.12013	0.149948	-7.4701	8.01363e-14	3.2336e-12	ENSRNOG00000017725	Pnlip	pancreatic lipase [Source:RGD Symbol;Acc:3360]
ENSRNOG00000020742	1644.83	-0.44276	0.120067	-3.6876	0.000226382	0.00102173	ENSRNOG00000020742	Pcnx3	pecanex 3 [Source:RGD Symbol;Acc:1305529]
ENSRNOG00000018877	797.776	-0.0621754	0.0750459	-0.828498	0.407389	0.533899	ENSRNOG00000018877	Zfp689	zinc finger protein 689 [Source:RGD Symbol;Acc:628696]
ENSRNOG00000020922	734.038	-0.498947	0.0755294	-6.606	3.94848e-11	8.83561e-10	ENSRNOG00000020922	Hspb6	heat shock protein family B (small) member 6 [Source:RGD Symbol;Acc:621554]
ENSRNOG00000011213	100.564	0.00832525	0.175926	0.0473223	0.962256	0.975833	ENSRNOG00000011213	Blm	BLM RecQ like helicase [Source:RGD Symbol;Acc:1308810]
ENSRNOG00000020929	340.502	-0.0979763	0.125941	-0.777954	0.436596	0.562946	ENSRNOG00000020929	Lin37	lin-37 DREAM MuvB core complex component [Source:RGD Symbol;Acc:1308901]
ENSRNOG00000018627	12686.1	-0.0403796	0.0678779	-0.594887	0.551919	0.66824	ENSRNOG00000018627	Plekhb1	pleckstrin homology domain containing B1 [Source:RGD Symbol;Acc:621614]
ENSRNOG00000030180	1810.29	-0.453525	0.105512	-4.29833	1.72086e-05	0.00010564	ENSRNOG00000030180	Lrrc10b	leucine rich repeat containing 10B [Source:RGD Symbol;Acc:1564983]
ENSRNOG00000019858	173.088	-0.579025	0.119468	-4.84668	1.25546e-06	1.03341e-05	ENSRNOG00000019858	Rom1	retinal outer segment membrane protein 1 [Source:RGD Symbol;Acc:1306070]
ENSRNOG00000019813	645.842	-0.14092	0.067183	-2.09756	0.0359445	0.0776858	ENSRNOG00000019813	Ppp4c	protein phosphatase 4, catalytic subunit [Source:RGD Symbol;Acc:621225]
ENSRNOG00000019913	1231.81	-0.107794	0.0620343	-1.73766	0.0822711	0.152598	ENSRNOG00000019913	Mta2	metastasis associated 1 family, member 2 [Source:RGD Symbol;Acc:1306743]
ENSRNOG00000067655	55.9058	0.170413	0.215184	0.791938	0.428397	0.554671	ENSRNOG00000067655	LOC103691235	uncharacterized LOC103691235 [Source:RGD Symbol;Acc:9213265]
ENSRNOG00000019005	824.386	-0.311498	0.0662517	-4.70174	2.57958e-06	1.95535e-05	ENSRNOG00000019005	Pde8a	phosphodiesterase 8A [Source:RGD Symbol;Acc:735125]
ENSRNOG00000014234	548.65	-0.0394412	0.0927087	-0.425431	0.670523	0.767603	ENSRNOG00000014234	Hif1an	hypoxia inducible factor 1 subunit alpha inhibitor [Source:RGD Symbol;Acc:1308281]
ENSRNOG00000052802	466.821	-0.649559	0.240343	-2.70263	0.00687927	0.0194572	ENSRNOG00000052802	Aldoa	aldolase, fructose-bisphosphate A [Source:RGD Symbol;Acc:2089]
ENSRNOG00000012196	537.442	0.694986	0.106942	6.49874	8.09978e-11	1.6816e-09	ENSRNOG00000012196	Asah2	N-acylsphingosine amidohydrolase 2 [Source:RGD Symbol;Acc:69410]
ENSRNOG00000010630	260.898	0.103659	0.107189	0.967068	0.33351	0.461774	ENSRNOG00000010630	Prcp	prolylcarboxypeptidase [Source:RGD Symbol;Acc:1307842]
ENSRNOG00000014078	3815.9	-0.0956047	0.0439558	-2.17502	0.0296287	0.0662711	ENSRNOG00000014078	Ndufb8	NADH:ubiquinone oxidoreductase subunit B8 [Source:RGD Symbol;Acc:1309129]
ENSRNOG00000036866	596.295	0.308587	0.107463	2.87157	0.0040844	0.0125238	ENSRNOG00000036866	Acer3	alkaline ceramidase 3 [Source:RGD Symbol;Acc:1561254]
ENSRNOG00000014183	754.956	0.357181	0.0972793	3.67171	0.000240933	0.00107925	ENSRNOG00000014183	Gnaq	G protein subunit alpha q [Source:RGD Symbol;Acc:620770]
ENSRNOG00000014482	1424.03	0.284868	0.0586898	4.85379	1.21123e-06	1.0003e-05	ENSRNOG00000014482	Slf2	SMC5-SMC6 complex localization factor 2 [Source:RGD Symbol;Acc:1560300]
ENSRNOG00000012061	7453.83	0.185125	0.0694343	2.66619	0.00767157	0.0213427	ENSRNOG00000012061	Prkcb	protein kinase C, beta [Source:RGD Symbol;Acc:3396]
ENSRNOG00000020076	1573.26	0.0939182	0.0626811	1.49835	0.134043	0.225819	ENSRNOG00000020076	Borcs7	BLOC-1 related complex subunit 7 [Source:RGD Symbol;Acc:1311783]
ENSRNOG00000020081	310.501	-0.311863	0.0974711	-3.19954	0.00137647	0.00492708	ENSRNOG00000020081	As3mt	arsenite methyltransferase [Source:RGD Symbol;Acc:621325]
ENSRNOG00000014833	533.372	0.296664	0.0899432	3.29835	0.000972551	0.00364444	ENSRNOG00000014833	Smndc1	survival motor neuron domain containing 1 [Source:RGD Symbol;Acc:1309151]
ENSRNOG00000050742	332.48	-0.223267	0.108003	-2.06723	0.0387121	0.0825019	ENSRNOG00000050742	Dnmbp	dynamin binding protein [Source:RGD Symbol;Acc:1583840]
ENSRNOG00000016770	15023.9	-0.0412572	0.0474015	-0.870378	0.384094	0.511304	ENSRNOG00000016770	Calm3	calmodulin 3 [Source:RGD Symbol;Acc:2259]
ENSRNOG00000019914	333.1	-0.203993	0.10007	-2.0385	0.0414995	0.0874697	ENSRNOG00000019914	Tlcd3b	TLC domain containing 3B [Source:RGD Symbol;Acc:1308215]
ENSRNOG00000028746	2577.72	0.0636049	0.0769185	0.826913	0.408286	0.534419	ENSRNOG00000028746	Gsto1	glutathione S-transferase omega 1 [Source:RGD Symbol;Acc:70952]
ENSRNOG00000069697	142.888	-0.301219	0.144892	-2.07893	0.0376239	0.0805734	ENSRNOG00000069697	Gsto2	glutathione S-transferase omega 2 [Source:RGD Symbol;Acc:1310764]
ENSRNOG00000069311	66.5475	0.338826	0.237785	1.42493	0.154179	0.252485	ENSRNOG00000069311
ENSRNOG00000014276	173.508	-0.163228	0.133649	-1.22132	0.221966	0.336608	ENSRNOG00000014276	Plce1	phospholipase C, epsilon 1 [Source:RGD Symbol;Acc:69424]
ENSRNOG00000031328	766.23	-0.0790291	0.0774461	-1.02044	0.30752	0.434727	ENSRNOG00000031328	Zfp110	zinc finger protein 110 [Source:RGD Symbol;Acc:1306339]
ENSRNOG00000016701	477.877	-0.37132	0.106485	-3.48707	0.000488337	0.0019939	ENSRNOG00000016701	Gng8	G protein subunit gamma 8 [Source:RGD Symbol;Acc:620808]
ENSRNOG00000027944	1141.96	0.0130121	0.070813	0.183753	0.854207	0.903083	ENSRNOG00000027944	Pnma8a	PNMA family member 8A [Source:RGD Symbol;Acc:1310803]
ENSRNOG00000042679	268.735	0.284743	0.144236	1.97415	0.0483644	0.098953	ENSRNOG00000042679	Lcor	ligand dependent nuclear receptor corepressor [Source:RGD Symbol;Acc:1311704]
ENSRNOG00000027919	253.876	0.479406	0.112495	4.26157	2.02996e-05	0.000121666	ENSRNOG00000027919	Rdh13	retinol dehydrogenase 13 [Source:RGD Symbol;Acc:1304959]
ENSRNOG00000068425	103.184	0.298549	0.167169	1.78592	0.0741127	0.14041	ENSRNOG00000068425	Zfp551	zinc finger protein 551 [Source:RGD Symbol;Acc:1592780]
ENSRNOG00000026432	813.089	-0.277628	0.103115	-2.69241	0.00709368	0.0199767	ENSRNOG00000026432	Syt7	synaptotagmin 7 [Source:RGD Symbol;Acc:62013]
ENSRNOG00000011262	712.982	-0.394694	0.111527	-3.53901	0.000401635	0.00168452	ENSRNOG00000011262	Bicra	BRD4 interacting chromatin remodeling complex associated protein [Source:RGD Symbol;Acc:1306385]
ENSRNOG00000026065	257.912	0.0275109	0.14084	0.195335	0.845131	0.897997	ENSRNOG00000026065	Slit1	slit guidance ligand 1 [Source:RGD Symbol;Acc:69307]
ENSRNOG00000043503	1051.06	-0.246396	0.0689637	-3.57284	0.000353127	0.00150515	ENSRNOG00000043503	Ehd1	EH-domain containing 1 [Source:RGD Symbol;Acc:1309017]
ENSRNOG00000062534	83.4519	0.278076	0.179095	1.55267	0.120502	0.20802	ENSRNOG00000062534	LOC100364427	ribosomal protein S12-like [Source:RGD Symbol;Acc:2321033]
ENSRNOG00000019464	49.1865	0.442171	0.246307	1.79521	0.072621	0.138127	ENSRNOG00000019464	Ttc9c	tetratricopeptide repeat domain 9C [Source:RGD Symbol;Acc:1359253]
ENSRNOG00000001492	3218.89	-0.214346	0.075236	-2.84898	0.00438596	0.0132985	ENSRNOG00000001492	Slc8a2	solute carrier family 8 member A2 [Source:RGD Symbol;Acc:620194]
ENSRNOG00000021916	57.3792	0.0139358	0.211748	0.0658133	0.947526	0.965839	ENSRNOG00000021916	Slc16a12	solute carrier family 16, member 12 [Source:RGD Symbol;Acc:1311468]
ENSRNOG00000015304	355.944	-0.519208	0.157625	-3.29394	0.000987951	0.00369105	ENSRNOG00000015304	Tmem160	transmembrane protein 160 [Source:RGD Symbol;Acc:1564549]
ENSRNOG00000062406	1347.45	0.61426	0.0791442	7.76128	8.40761e-15	4.02811e-13	ENSRNOG00000062406	Mosmo	modulator of smoothened [Source:RGD Symbol;Acc:7606925]
ENSRNOG00000015376	245.357	-0.174307	0.162022	-1.07582	0.282007	0.406225	ENSRNOG00000015376	Npas1	neuronal PAS domain protein 1 [Source:RGD Symbol;Acc:1310040]
ENSRNOG00000020773	578.085	-0.50561	0.139023	-3.63689	0.000275949	0.00121427	ENSRNOG00000020773	Map3k11	mitogen-activated protein kinase kinase kinase 11 [Source:RGD Symbol;Acc:1359261]
ENSRNOG00000016907	1290.44	0.0298348	0.0850417	0.350825	0.72572	0.811084	ENSRNOG00000016907	Ppp5c	protein phosphatase 5, catalytic subunit [Source:RGD Symbol;Acc:68415]
ENSRNOG00000053347	290.242	0.151816	0.103844	1.46197	0.143749	0.238804	ENSRNOG00000053347	Ccdc28a	coiled-coil domain containing 28A [Source:RGD Symbol;Acc:1310326]
ENSRNOG00000025110	174.184	-0.158521	0.16464	-0.962838	0.335629	0.463505	ENSRNOG00000025110	Vwa3a	von Willebrand factor A domain containing 3A [Source:RGD Symbol;Acc:1311670]
ENSRNOG00000021390	602.641	-0.0795334	0.0935447	-0.850218	0.395204	0.522649	ENSRNOG00000021390	Meis3	Meis homeobox 3 [Source:RGD Symbol;Acc:1308532]
ENSRNOG00000020144	596.652	-0.0759091	0.105725	-0.717988	0.472764	0.597269	ENSRNOG00000020144	Rusf1	RUS family member 1 [Source:RGD Symbol;Acc:1310127]
ENSRNOG00000014531	1664.23	-0.035676	0.0620165	-0.575266	0.565111	0.678715	ENSRNOG00000014531	Hbs1l	HBS1-like translational GTPase [Source:RGD Symbol;Acc:1308509]
ENSRNOG00000028832	378.451	0.407476	0.113805	3.58049	0.000342945	0.00146635	ENSRNOG00000028832	Sorcs3	sortilin-related VPS10 domain containing receptor 3 [Source:RGD Symbol;Acc:1310974]
ENSRNOG00000030788	37.558	-0.763191	0.252818	-3.01873	0.00253835	0.00834285	ENSRNOG00000030788	Olr35	olfactory receptor 35 [Source:RGD Symbol;Acc:1333428]
ENSRNOG00000014353	1958.45	-0.450263	0.118805	-3.78993	0.000150691	0.000711927	ENSRNOG00000014353	Sympk	symplekin scaffold protein [Source:RGD Symbol;Acc:1306735]
ENSRNOG00000009482	209.074	-0.407793	0.130467	-3.12565	0.00177412	0.00613737	ENSRNOG00000009482	Emx2	empty spiracles homeobox 2 [Source:RGD Symbol;Acc:1564797]
ENSRNOG00000036760	95.8305	-0.338844	0.163337	-2.07451	0.0380323	0.0812617	ENSRNOG00000036760	Tmc5	transmembrane channel-like 5 [Source:RGD Symbol;Acc:1307037]
ENSRNOG00000014768	167.918	-0.107173	0.131675	-0.813922	0.41569	0.54194	ENSRNOG00000014768	Glis3	GLIS family zinc finger 3 [Source:RGD Symbol;Acc:1565505]
ENSRNOG00000027936	128.523	-0.316647	0.158872	-1.9931	0.0462507	0.0954252	ENSRNOG00000027936	Ccdc8	coiled-coil domain containing 8 [Source:RGD Symbol;Acc:1359717]
ENSRNOG00000058050	3810.84	0.334252	0.0522242	6.40031	1.55057e-10	3.04972e-09	ENSRNOG00000058050	Bclaf1	mitochondrial fission regulator 2 [Source:RGD Symbol;Acc:6494892]
ENSRNOG00000019973	3261.91	-0.231362	0.071382	-3.24118	0.00119036	0.00434307	ENSRNOG00000019973	Arl3	ADP ribosylation factor like GTPase 3 [Source:RGD Symbol;Acc:69327]
ENSRNOG00000060146	68.0969	-0.501894	0.194396	-2.58181	0.00982845	0.0263195	ENSRNOG00000060146	Six5	SIX homeobox 5 [Source:RGD Symbol;Acc:1305040]
ENSRNOG00000050395	56.436	-0.185037	0.228293	-0.810522	0.41764	0.544042	ENSRNOG00000050395	Ms4a6bl	membrane-spanning 4-domains, subfamily A, member 6B-like [Source:RGD Symbol;Acc:1359381]
ENSRNOG00000020075	8436.03	-0.22951	0.0382882	-5.99428	2.04391e-09	3.20928e-08	ENSRNOG00000020075	Eef1g	eukaryotic translation elongation factor 1 gamma [Source:RGD Symbol;Acc:1302939]
ENSRNOG00000021062	285.58	-0.201129	0.103874	-1.93629	0.0528328	0.106206	ENSRNOG00000021062	Fxyd5	FXYD domain-containing ion transport regulator 5 [Source:RGD Symbol;Acc:620827]
ENSRNOG00000030616	43.5925	-0.259034	0.275959	-0.938668	0.347901	0.475548	ENSRNOG00000030616	Slc25a45	solute carrier family 25, member 45 [Source:RGD Symbol;Acc:1589953]
ENSRNOG00000001494	4949.63	0.0395993	0.0646152	0.612848	0.539977	0.658381	ENSRNOG00000001494	Napa	NSF attachment protein alpha [Source:RGD Symbol;Acc:620855]
ENSRNOG00000014215	2163.03	0.130434	0.0964744	1.35201	0.176372	0.281276	ENSRNOG00000014215	Klf9	KLF transcription factor 9 [Source:RGD Symbol;Acc:70934]
ENSRNOG00000023296	119.304	-0.383463	0.152762	-2.5102	0.0120662	0.0313476	ENSRNOG00000023296	Wtip	WT1 interacting protein [Source:RGD Symbol;Acc:1306411]
ENSRNOG00000019142	38.439	0.30607	0.24993	1.22462	0.220717	0.335122	ENSRNOG00000019142	Fas	Fas cell surface death receptor [Source:RGD Symbol;Acc:619831]
ENSRNOG00000020776	457.215	-0.597948	0.0953019	-6.27425	3.51321e-10	6.43572e-09	ENSRNOG00000020776	Dhcr7	7-dehydrocholesterol reductase [Source:RGD Symbol;Acc:621769]
ENSRNOG00000053725	1960.48	-0.38091	0.0721151	-5.28198	1.27796e-07	1.33401e-06	ENSRNOG00000053725	Usf2	upstream transcription factor 2, c-fos interacting [Source:RGD Symbol;Acc:620975]
ENSRNOG00000020705	206.229	0.224053	0.114281	1.96055	0.0499321	0.101521	ENSRNOG00000020705	Rnls	renalase, FAD-dependent amine oxidase [Source:RGD Symbol;Acc:1309804]
ENSRNOG00000011245	504.526	-0.23265	0.0958469	-2.42731	0.0152112	0.0380803	ENSRNOG00000011245	Arhgap18	Rho GTPase activating protein 18 [Source:RGD Symbol;Acc:1305053]
ENSRNOG00000021113	1932.18	0.231416	0.0560028	4.13222	3.59282e-05	0.000201446	ENSRNOG00000021113	Uba2	ubiquitin-like modifier activating enzyme 2 [Source:RGD Symbol;Acc:1312023]
ENSRNOG00000032677	1467.79	-0.646091	0.193068	-3.34644	0.00081855	0.003143	ENSRNOG00000032677	Tssc4	tumor suppressing subtransferable candidate 4 [Source:RGD Symbol;Acc:1307043]
ENSRNOG00000015128	1296	0.0812966	0.0587768	1.38314	0.166621	0.268853	ENSRNOG00000015128	Sae1	SUMO1 activating enzyme subunit 1 [Source:RGD Symbol;Acc:1306098]
ENSRNOG00000010861	2417.67	0.389689	0.0687563	5.66768	1.44746e-08	1.88144e-07	ENSRNOG00000010861	Atad1	ATPase family, AAA domain containing 1 [Source:RGD Symbol;Acc:1308570]
ENSRNOG00000020457	1767.04	-0.247573	0.0630442	-3.92698	8.60183e-05	0.000434833	ENSRNOG00000020457	Tacc2	transforming, acidic coiled-coil containing protein 2 [Source:RGD Symbol;Acc:1303004]
ENSRNOG00000015229	903.63	-0.250233	0.0857117	-2.91947	0.00350626	0.010997	ENSRNOG00000015229	Zc3h4	zinc finger CCCH-type containing 4 [Source:RGD Symbol;Acc:1596943]
ENSRNOG00000021053	291.14	-0.781981	0.125252	-6.24326	4.28535e-10	7.71776e-09	ENSRNOG00000021053	Lsr	lipolysis stimulated lipoprotein receptor [Source:RGD Symbol;Acc:69236]
ENSRNOG00000020692	280.917	0.379468	0.0942923	4.02438	5.71263e-05	0.000304864	ENSRNOG00000020692	Tmem216	transmembrane protein 216 [Source:RGD Symbol;Acc:1304607]
ENSRNOG00000015473	37.1926	-0.0356657	0.293197	-0.121644	0.903181	0.935927	ENSRNOG00000015473	Phactr2	phosphatase and actin regulator 2 [Source:RGD Symbol;Acc:1303141]
ENSRNOG00000015948	137.374	0.0217297	0.134718	0.161298	0.871858	0.915185	ENSRNOG00000015948	Slc1a5	solute carrier family 1 member 5 [Source:RGD Symbol;Acc:708512]
ENSRNOG00000025350	113.648	-0.667253	0.180398	-3.69878	0.000216635	0.00098517	ENSRNOG00000025350	Ppp1r13l	protein phosphatase 1, regulatory subunit 13 like [Source:RGD Symbol;Acc:1593681]
ENSRNOG00000016055	1045.87	0.151929	0.0618539	2.45625	0.0140394	0.0356239	ENSRNOG00000016055	Fkrp	fukutin related protein [Source:RGD Symbol;Acc:1305852]
ENSRNOG00000012701	3268.32	-0.190493	0.0739501	-2.57597	0.009996	0.0266965	ENSRNOG00000012701	Map7	microtubule-associated protein 7 [Source:RGD Symbol;Acc:1308866]
ENSRNOG00000016145	3732.28	-0.290289	0.087002	-3.33658	0.000848172	0.00323844	ENSRNOG00000016145	Strn4	striatin 4 [Source:RGD Symbol;Acc:1307030]
ENSRNOG00000017955	119.29	-0.313768	0.153045	-2.05016	0.0403485	0.0853566	ENSRNOG00000017955	Nudt8	nudix hydrolase 8 [Source:RGD Symbol;Acc:1309040]
ENSRNOG00000020807	70.1937	-1.28674	0.241421	-5.32985	9.82926e-08	1.06269e-06	ENSRNOG00000020807	Wdr62	WD repeat domain 62 [Source:RGD Symbol;Acc:1306714]
ENSRNOG00000046667	286.993	0.547731	0.336665	1.62693	0.103751	0.184738	ENSRNOG00000046667	Fosb	FosB proto-oncogene, AP-1 transcription factor subunit [Source:RGD Symbol;Acc:1308198]
ENSRNOG00000013279	195.567	-0.0492392	0.14239	-0.345805	0.729489	0.813458	ENSRNOG00000013279	LOC681458	similar to stearoyl-coenzyme A desaturase 3 [Source:RGD Symbol;Acc:1595370]
ENSRNOG00000047605	78.1315	-0.126969	0.228447	-0.555789	0.578355	0.689854	ENSRNOG00000047605	Ptprk	protein tyrosine phosphatase, receptor type, K [Source:RGD Symbol;Acc:619706]
ENSRNOG00000010117	3852.81	0.105554	0.0767518	1.37526	0.169052	0.271806	ENSRNOG00000010117	Eif3a	eukaryotic translation initiation factor 3, subunit A [Source:RGD Symbol;Acc:1307269]
ENSRNOG00000018282	608.803	0.0241593	0.129158	0.187052	0.85162	0.901606	ENSRNOG00000018282	Gda	guanine deaminase [Source:RGD Symbol;Acc:621617]
ENSRNOG00000013456	636.559	-0.430797	0.0959811	-4.48836	7.17746e-06	4.80254e-05	ENSRNOG00000013456	Ighmbp2	immunoglobulin mu DNA binding protein 2 [Source:RGD Symbol;Acc:68325]
ENSRNOG00000070097	31.8409	-0.207512	0.306183	-0.677737	0.497939	0.620059	ENSRNOG00000070097
ENSRNOG00000025111	25.9758	-0.0805366	0.335088	-0.240345	0.810063	0.872771	ENSRNOG00000025111	Nfkbid	NFKB inhibitor delta [Source:RGD Symbol;Acc:1308055]
ENSRNOG00000049028	139.532	0.0656837	0.149564	0.439167	0.66054	0.760221	ENSRNOG00000049028	C5ar2	complement C5a receptor 2 [Source:RGD Symbol;Acc:1303027]
ENSRNOG00000024931	145.821	-0.415815	0.1488	-2.79447	0.00519855	0.0153847	ENSRNOG00000024931	Ccdc88b	coiled-coil domain containing 88B [Source:RGD Symbol;Acc:1311475]
ENSRNOG00000011720	258.225	0.031129	0.0992593	0.313613	0.753815	0.830853	ENSRNOG00000011720	L3mbtl3	L3MBTL histone methyl-lysine binding protein 3 [Source:RGD Symbol;Acc:1305474]
ENSRNOG00000024278	914.392	-0.400511	0.0976594	-4.1011	4.11196e-05	0.000226727	ENSRNOG00000024278	Rbm42	RNA binding motif protein 42 [Source:RGD Symbol;Acc:1306184]
ENSRNOG00000014132	504.727	-0.108247	0.0894986	-1.20948	0.226479	0.342202	ENSRNOG00000014132	Mypop	Myb-related transcription factor, partner of profilin [Source:RGD Symbol;Acc:1565160]
ENSRNOG00000019507	2605.95	-0.0860212	0.0615526	-1.39752	0.162257	0.26346	ENSRNOG00000019507	Hnrnpul2	heterogeneous nuclear ribonucleoprotein U-like 2 [Source:RGD Symbol;Acc:1562784]
ENSRNOG00000070506	55.3476	-0.750595	0.276698	-2.71268	0.00667407	0.0189629	ENSRNOG00000070506	Chst8	carbohydrate sulfotransferase 8 [Source:RGD Symbol;Acc:1308979]
ENSRNOG00000012311	888.704	0.468013	0.0943762	4.95901	7.08517e-07	6.21168e-06	ENSRNOG00000012311	Slc35d3	solute carrier family 35, member D3 [Source:RGD Symbol;Acc:1309428]
ENSRNOG00000014254	1052.73	-0.385225	0.0625037	-6.16324	7.12724e-10	1.22598e-08	ENSRNOG00000014254	Cpt1a	carnitine palmitoyltransferase 1A [Source:RGD Symbol;Acc:2396]
ENSRNOG00000021085	3319.03	0.0882771	0.061337	1.43921	0.15009	0.247222	ENSRNOG00000021085	Sf1	splicing factor 1 [Source:RGD Symbol;Acc:620645]
ENSRNOG00000020451	30.8212	-0.409912	0.34058	-1.20357	0.228756	0.345014	ENSRNOG00000020451	Cd81	Cd81 molecule [Source:RGD Symbol;Acc:2315]
ENSRNOG00000049951	2179.32	-0.586731	0.109362	-5.36502	8.0941e-08	8.9424e-07	ENSRNOG00000049951	Tmem151a	transmembrane protein 151A [Source:RGD Symbol;Acc:1310680]
ENSRNOG00000055934	839.803	0.151499	0.0972483	1.55786	0.119268	0.206533	ENSRNOG00000055934	Dmkn	dermokine [Source:RGD Symbol;Acc:1561521]
ENSRNOG00000020702	215.402	-0.0173724	0.187281	-0.0927614	0.926093	0.951105	ENSRNOG00000020702	Cyb561a3	cytochrome b561 family, member A3 [Source:RGD Symbol;Acc:1304670]
ENSRNOG00000013422	727.555	0.0484545	0.0667831	0.725551	0.468114	0.592947	ENSRNOG00000013422	Med23	mediator complex subunit 23 [Source:RGD Symbol;Acc:1307671]
ENSRNOG00000021052	730.314	0.139817	0.0639423	2.18662	0.0287706	0.0647783	ENSRNOG00000021052	Patl1	PAT1 homolog 1, processing body mRNA decay factor [Source:RGD Symbol;Acc:1305514]
ENSRNOG00000019229	654.026	-0.0909558	0.0723356	-1.25741	0.208604	0.320935	ENSRNOG00000019229	Fbl	fibrillarin [Source:RGD Symbol;Acc:1305542]
ENSRNOG00000020845	382.659	0.182902	0.116712	1.56713	0.117084	0.203698	ENSRNOG00000020845	Tyrobp	transmembrane immune signaling adaptor Tyrobp [Source:RGD Symbol;Acc:1303081]
ENSRNOG00000020704	116.305	-0.349359	0.145122	-2.40734	0.0160692	0.0398147	ENSRNOG00000020704	Tkfc	triokinase and FMN cyclase [Source:RGD Symbol;Acc:1311026]
ENSRNOG00000017225	267.036	0.0723914	0.112101	0.645767	0.51843	0.638555	ENSRNOG00000017225	Fhip2a	FHF complex subunit HOOK interacting protein 2A [Source:RGD Symbol;Acc:1306116]
ENSRNOG00000013202	599.789	0.0766077	0.0785401	0.975397	0.329363	0.457176	ENSRNOG00000013202	Akap7	A-kinase anchoring protein 7 [Source:RGD Symbol;Acc:1303071]
ENSRNOG00000067501	48.8731	-0.600485	0.222719	-2.69615	0.00701456	0.0197874	ENSRNOG00000067501
ENSRNOG00000013791	46.3117	0.0583929	0.229199	0.254769	0.798901	0.863667	ENSRNOG00000013791	Enpp3	ectonucleotide pyrophosphatase/phosphodiesterase 3 [Source:RGD Symbol;Acc:708511]
ENSRNOG00000021125	2935.22	0.0900566	0.0696534	1.29293	0.196037	0.305819	ENSRNOG00000021125	Prdx5	peroxiredoxin 5 [Source:RGD Symbol;Acc:71007]
ENSRNOG00000046000	1181.03	-0.625853	0.189377	-3.3048	0.000950448	0.00357147	ENSRNOG00000046000	Clasrp	CLK4-associating serine/arginine rich protein [Source:RGD Symbol;Acc:1563538]
ENSRNOG00000015036	582.471	-0.178668	0.163018	-1.096	0.273078	0.396539	ENSRNOG00000015036	Ccn2	cellular communication network factor 2 [Source:RGD Symbol;Acc:621392]
ENSRNOG00000013239	2566.3	0.494493	0.0710256	6.96219	3.35033e-12	9.42666e-11	ENSRNOG00000013239	Tle4	TLE family member 4, transcriptional corepressor [Source:RGD Symbol;Acc:3868]
ENSRNOG00000009954	965.281	0.181784	0.085808	2.1185	0.0341331	0.0744306	ENSRNOG00000009954	Cacul1	CDK2-associated, cullin domain 1 [Source:RGD Symbol;Acc:1308127]
ENSRNOG00000033235	61.6896	-0.449042	0.231958	-1.93588	0.052883	0.106292	ENSRNOG00000033235	Relb	RELB proto-oncogene, NF-kB subunit [Source:RGD Symbol;Acc:2321078]
ENSRNOG00000025890	1248.7	-0.10339	0.0645729	-1.60114	0.109347	0.192863	ENSRNOG00000025890	Opa3	outer mitochondrial membrane lipid metabolism regulator OPA3 [Source:RGD Symbol;Acc:1309147]
ENSRNOG00000013845	389.952	0.0886805	0.0905616	0.979228	0.327467	0.455477	ENSRNOG00000013845	Mrpl21	mitochondrial ribosomal protein L21 [Source:RGD Symbol;Acc:1310203]
ENSRNOG00000055286	596.71	-0.303501	0.11457	-2.64904	0.00807216	0.0222872	ENSRNOG00000055286	Yif1b	Yip1 interacting factor homolog B, membrane trafficking protein [Source:RGD Symbol;Acc:735199]
ENSRNOG00000016367	361.595	-0.333668	0.100039	-3.33537	0.000851849	0.00324833	ENSRNOG00000016367	Vasp	vasodilator-stimulated phosphoprotein [Source:RGD Symbol;Acc:1311542]
ENSRNOG00000045543	146.056	0.0654594	0.135674	0.482474	0.629469	0.733497	ENSRNOG00000045543	Frat2	FRAT regulator of WNT signaling pathway 2 [Source:RGD Symbol;Acc:1591882]
ENSRNOG00000011134	243.124	-0.684138	0.122489	-5.58528	2.33324e-08	2.86114e-07	ENSRNOG00000011134	Lama2	laminin subunit alpha 2 [Source:RGD Symbol;Acc:1308889]
ENSRNOG00000016265	669.784	0.145633	0.0743688	1.95826	0.0501999	0.101996	ENSRNOG00000016265	Acsl5	acyl-CoA synthetase long-chain family member 5 [Source:RGD Symbol;Acc:69402]
ENSRNOG00000019964	3313.17	-0.479653	0.0708073	-6.77406	1.25214e-11	3.15102e-10	ENSRNOG00000019964	Taok2	TAO kinase 2 [Source:RGD Symbol;Acc:621590]
ENSRNOG00000021023	12524.7	-0.539371	0.0939787	-5.7393	9.50702e-09	1.2884e-07	ENSRNOG00000021023	Mag	myelin-associated glycoprotein [Source:RGD Symbol;Acc:3035]
ENSRNOG00000012536	712.432	0.0320055	0.0978062	0.327234	0.743491	0.823516	ENSRNOG00000012536	Sgms1	sphingomyelin synthase 1 [Source:RGD Symbol;Acc:727912]
ENSRNOG00000013023	1471.43	-0.341875	0.097202	-3.51716	0.000436186	0.00180913	ENSRNOG00000013023	Nop53	NOP53 ribosome biogenesis factor [Source:RGD Symbol;Acc:1303085]
ENSRNOG00000047783	33.8366	0.75621	0.317355	2.38285	0.0171792	0.0420769	ENSRNOG00000047783	Tmem200a	transmembrane protein 200A [Source:RGD Symbol;Acc:1564024]
ENSRNOG00000020636	545.681	0.167627	0.0724547	2.31354	0.0206928	0.049207	ENSRNOG00000020636	Spint2	serine peptidase inhibitor, Kunitz type, 2 [Source:RGD Symbol;Acc:735123]
ENSRNOG00000020715	4916.5	-0.017948	0.0615756	-0.29148	0.770684	0.843414	ENSRNOG00000020715	Ddb1	damage-specific DNA binding protein 1 [Source:RGD Symbol;Acc:621889]
ENSRNOG00000064132	497.778	-0.00566717	0.0921734	-0.0614838	0.950974	0.967716	ENSRNOG00000064132
ENSRNOG00000015852	4349.14	-0.00353149	0.0507071	-0.069645	0.944476	0.964215	ENSRNOG00000015852	Arhgap35	Rho GTPase activating protein 35 [Source:RGD Symbol;Acc:1308738]
ENSRNOG00000020676	548.41	-0.705493	0.157181	-4.48841	7.17558e-06	4.80254e-05	ENSRNOG00000020676	Ppp1r14a	protein phosphatase 1, regulatory (inhibitor) subunit 14A [Source:RGD Symbol;Acc:620536]
ENSRNOG00000020250	239.114	0.362816	0.115951	3.12905	0.00175372	0.00608792	ENSRNOG00000020250	Pcgf6	polycomb group ring finger 6 [Source:RGD Symbol;Acc:1306904]
ENSRNOG00000031700	247.523	-0.255052	0.109769	-2.32353	0.0201505	0.0480551	ENSRNOG00000031700	Map3k5	mitogen-activated protein kinase kinase kinase 5 [Source:RGD Symbol;Acc:1306565]
ENSRNOG00000018730	307.647	-0.47257	0.121775	-3.88069	0.000104161	0.000514294	ENSRNOG00000018730	Nectin2	nectin cell adhesion molecule 2 [Source:RGD Symbol;Acc:1309505]
ENSRNOG00000014997	1117.06	0.140399	0.0685587	2.04787	0.0405729	0.0857409	ENSRNOG00000014997	Igf2r	insulin-like growth factor 2 receptor [Source:RGD Symbol;Acc:2871]
ENSRNOG00000020881	606.397	-0.348212	0.0943867	-3.68921	0.000224953	0.00101709	ENSRNOG00000020881	Frmd8	FERM domain containing 8 [Source:RGD Symbol;Acc:1310323]
ENSRNOG00000020201	358.486	-0.179535	0.0903114	-1.98795	0.0468172	0.096328	ENSRNOG00000020201	Yif1a	Yip1 interacting factor homolog A, membrane trafficking protein [Source:RGD Symbol;Acc:628749]
ENSRNOG00000020687	1851.54	-0.300979	0.10138	-2.96881	0.00298956	0.00960688	ENSRNOG00000020687	Dpf1	double PHD fingers 1 [Source:RGD Symbol;Acc:61868]
ENSRNOG00000020021	1892.57	-0.189138	0.0847945	-2.23055	0.0257112	0.0589013	ENSRNOG00000020021	Brsk2	BR serine/threonine kinase 2 [Source:RGD Symbol;Acc:1566256]
ENSRNOG00000048848	1501.34	-0.438711	0.114623	-3.82741	0.000129496	0.000627052	ENSRNOG00000048848	Ccdc9	InaF-motif containing 1 [Source:RGD Symbol;Acc:2301983]
ENSRNOG00000017294	656.886	0.322666	0.0785992	4.10521	4.03942e-05	0.000223221	ENSRNOG00000017294	Zranb1	zinc finger RANBP2-type containing 1 [Source:RGD Symbol;Acc:2321751]
ENSRNOG00000020989	147.539	-0.650332	0.150009	-4.33528	1.45575e-05	9.11598e-05	ENSRNOG00000020989	Tm7sf2	transmembrane 7 superfamily member 2 [Source:RGD Symbol;Acc:1311205]
ENSRNOG00000013994	214.797	-0.220531	0.122637	-1.79824	0.0721384	0.137401	ENSRNOG00000013994	Enpp1	ectonucleotide pyrophosphatase/phosphodiesterase 1 [Source:RGD Symbol;Acc:628825]
ENSRNOG00000021057	2327.53	0.175303	0.052606	3.33237	0.000861096	0.00328108	ENSRNOG00000021057	Osbp	oxysterol binding protein [Source:RGD Symbol;Acc:1308069]
ENSRNOG00000017699	24.0136	-0.235531	0.390933	-0.602485	0.546851	0.663964	ENSRNOG00000017699	Mill1	MHC I like leukocyte 1 [Source:RGD Symbol;Acc:1311714]
ENSRNOG00000018107	3016.78	0.738049	0.0841652	8.76905	1.80176e-18	1.66251e-16	ENSRNOG00000018107	Zfand5	zinc finger AN1-type containing 5 [Source:RGD Symbol;Acc:1310776]
ENSRNOG00000069776	22.2398	0.244219	0.314997	0.775308	0.438158	0.564376	ENSRNOG00000069776	RGD1563307	similar to Set beta isoform [Source:RGD Symbol;Acc:1563307]
ENSRNOG00000015271	241.764	0.165647	0.105288	1.57327	0.115656	0.201753	ENSRNOG00000015271	Zfp418	zinc finger protein 418 [Source:RGD Symbol;Acc:1311663]
ENSRNOG00000011346	222.945	-0.649612	0.135064	-4.80964	1.512e-06	1.2184e-05	ENSRNOG00000011346	Ehd2	EH-domain containing 2 [Source:RGD Symbol;Acc:1560856]
ENSRNOG00000036576	555.775	0.0262127	0.0998294	0.262575	0.792878	0.859709	ENSRNOG00000036576	Zdhhc6	zinc finger DHHC-type palmitoyltransferase 6 [Source:RGD Symbol;Acc:1304657]
ENSRNOG00000020000	253.58	-0.172825	0.105561	-1.63722	0.101585	0.181486	ENSRNOG00000020000	Tmem219	transmembrane protein 219 [Source:RGD Symbol;Acc:1560566]
ENSRNOG00000027161	385.608	0.147472	0.104449	1.4119	0.15798	0.257719	ENSRNOG00000027161	C1h9orf85	similar to human chromosome 9 open reading frame 85 [Source:RGD Symbol;Acc:1359158]
ENSRNOG00000066094	29.5449	0.272086	0.283652	0.959224	0.337446	0.465326	ENSRNOG00000066094	LOC691135	similar to zinc finger protein 418 [Source:RGD Symbol;Acc:1587451]
ENSRNOG00000045795	539.168	0.105216	0.0759377	1.38555	0.165884	0.267981	ENSRNOG00000045795	Gatd1	glutamine amidotransferase class 1 domain containing 1 [Source:RGD Symbol;Acc:1304836]
ENSRNOG00000061526	40.5794	-0.00339355	0.224215	-0.0151353	0.987924	0.992172	ENSRNOG00000061526	Rsph6a	radial spoke head 6 homolog A [Source:RGD Symbol;Acc:1306786]
ENSRNOG00000021133	1621.26	0.150004	0.0656647	2.2844	0.022348	0.0524259	ENSRNOG00000021133	Lsm14a	LSM14A mRNA processing body assembly factor [Source:RGD Symbol;Acc:1305695]
ENSRNOG00000055858	76.0319	0.496728	0.233613	2.12629	0.0334791	0.073199	ENSRNOG00000055858	Myb	MYB proto-oncogene, transcription factor [Source:RGD Symbol;Acc:1560020]
ENSRNOG00000025476	64.9218	-0.527532	0.271111	-1.94581	0.0516771	0.104233	ENSRNOG00000025476	Tmem252	transmembrane protein 252 [Source:RGD Symbol;Acc:1359349]
ENSRNOG00000021174	309.604	-0.364363	0.132024	-2.75982	0.00578332	0.0168156	ENSRNOG00000021174	Macrod1	mono-ADP ribosylhydrolase 1 [Source:RGD Symbol;Acc:628701]
ENSRNOG00000017002	205.657	0.198278	0.128959	1.53752	0.124165	0.2127	ENSRNOG00000017002	Adrb1	adrenoceptor beta 1 [Source:RGD Symbol;Acc:2059]
ENSRNOG00000023863	33.8381	1.46977	0.327981	4.48126	7.42047e-06	4.94081e-05	ENSRNOG00000023863	Gpr139	G protein-coupled receptor 139 [Source:RGD Symbol;Acc:1311729]
ENSRNOG00000062946	49.4147	-0.13938	0.208968	-0.666992	0.504777	0.626789	ENSRNOG00000062946
ENSRNOG00000021139	69.1748	-0.318927	0.233774	-1.36426	0.172487	0.276201	ENSRNOG00000021139	Esrra	estrogen related receptor, alpha [Source:RGD Symbol;Acc:1583866]
ENSRNOG00000027156	1951.65	-0.141305	0.0846502	-1.66929	0.0950608	0.171677	ENSRNOG00000027156	Morn4	MORN repeat containing 4 [Source:RGD Symbol;Acc:1307336]
ENSRNOG00000014984	1644	-0.304494	0.0946341	-3.21759	0.00129271	0.00466218	ENSRNOG00000014984	Dmwd	DM1 locus, WD repeat containing [Source:RGD Symbol;Acc:1594179]
ENSRNOG00000022946	306.477	0.113948	0.15364	0.741655	0.458296	0.58375	ENSRNOG00000022946	Slc22a3	solute carrier family 22 member 3 [Source:RGD Symbol;Acc:3701]
ENSRNOG00000013304	36.3302	0.7584	0.275115	2.75667	0.00583941	0.0169589	ENSRNOG00000013304	Arg1	arginase 1 [Source:RGD Symbol;Acc:2150]
ENSRNOG00000020703	991.683	-0.180039	0.0830909	-2.16678	0.0302519	0.0673727	ENSRNOG00000020703	Sipa1l3	signal-induced proliferation-associated 1 like 3 [Source:RGD Symbol;Acc:1311432]
ENSRNOG00000012514	532.813	0.576833	0.0977969	5.89827	3.67331e-09	5.4527e-08	ENSRNOG00000012514	Abhd17b	abhydrolase domain containing 17B, depalmitoylase [Source:RGD Symbol;Acc:1305246]
ENSRNOG00000014675	1514.59	0.0909364	0.0565684	1.60755	0.107934	0.19089	ENSRNOG00000014675	Pi4k2a	phosphatidylinositol 4-kinase type 2 alpha [Source:RGD Symbol;Acc:620485]
ENSRNOG00000015598	38.8081	-0.114007	0.262592	-0.43416	0.664172	0.762757	ENSRNOG00000015598	Zfp772	zinc finger protein 772 [Source:RGD Symbol;Acc:1308782]
ENSRNOG00000042786	821.585	0.000483716	0.0829007	0.00583489	0.995344	0.996893	ENSRNOG00000042786	Vti1a	vesicle transport through interaction with t-SNAREs 1A [Source:RGD Symbol;Acc:621490]
ENSRNOG00000059386	367.848	0.0391997	0.107978	0.363034	0.71658	0.804524	ENSRNOG00000059386	Nudt19	nudix hydrolase 19 [Source:RGD Symbol;Acc:1302935]
ENSRNOG00000017326	407.647	-0.188398	0.093807	-2.00835	0.0446058	0.0927354	ENSRNOG00000017326	Ctbp2	C-terminal binding protein 2 [Source:RGD Symbol;Acc:68372]
ENSRNOG00000016411	5272.47	-0.456083	0.0940013	-4.85187	1.223e-06	1.00947e-05	ENSRNOG00000016411	Rps12	ribosomal protein S12 [Source:RGD Symbol;Acc:62024]
ENSRNOG00000021090	2140.9	-0.756782	0.0646199	-11.7113	1.11578e-31	1.3899e-28	ENSRNOG00000021090	Pygm	glycogen phosphorylase, muscle associated [Source:RGD Symbol;Acc:3461]
ENSRNOG00000014173	1752.95	0.0374891	0.0568841	0.659043	0.509868	0.630699	ENSRNOG00000014173	Smc3	structural maintenance of chromosomes 3 [Source:RGD Symbol;Acc:62006]
ENSRNOG00000020941	1143.68	-0.0015794	0.0722653	-0.0218556	0.982563	0.989482	ENSRNOG00000020941	Psenen	presenilin enhancer gamma secretase subunit [Source:RGD Symbol;Acc:1312037]
ENSRNOG00000029399	605.386	-0.831589	0.0978437	-8.49916	1.90972e-17	1.41319e-15	ENSRNOG00000029399	Bcam	basal cell adhesion molecule (Lutheran blood group) [Source:RGD Symbol;Acc:68378]
ENSRNOG00000018553	6045.35	-0.75337	0.149225	-5.04855	4.45165e-07	4.08241e-06	ENSRNOG00000018553	Pitpnm1	phosphatidylinositol transfer protein, membrane-associated 1 [Source:RGD Symbol;Acc:1306710]
ENSRNOG00000020247	3792.51	-0.49708	0.0966529	-5.14294	2.70478e-07	2.6169e-06	ENSRNOG00000020247	Cnih2	cornichon family AMPA receptor auxiliary protein 2 [Source:RGD Symbol;Acc:1304930]
ENSRNOG00000016448	944.2	-0.310252	0.0898552	-3.4528	0.000554798	0.00223896	ENSRNOG00000016448	Eef2k	eukaryotic elongation factor-2 kinase [Source:RGD Symbol;Acc:2538]
ENSRNOG00000015406	434.089	0.423656	0.115018	3.68338	0.000230164	0.00103754	ENSRNOG00000015406	Pgm5	phosphoglucomutase 5 [Source:RGD Symbol;Acc:1307969]
ENSRNOG00000027459	350.211	-0.308473	0.118441	-2.60445	0.0092021	0.0248785	ENSRNOG00000027459	Zbtb45	zinc finger and BTB domain containing 45 [Source:RGD Symbol;Acc:1310920]
ENSRNOG00000015670	2727.1	0.508606	0.0742978	6.84551	7.62029e-12	2.00542e-10	ENSRNOG00000015670	Stx7	syntaxin 7 [Source:RGD Symbol;Acc:619747]
ENSRNOG00000022289	981.256	-0.190241	0.102335	-1.859	0.0630278	0.122834	ENSRNOG00000022289	Aip	aryl-hydrocarbon receptor-interacting protein [Source:RGD Symbol;Acc:628619]
ENSRNOG00000020935	103.917	0.19986	0.181021	1.10407	0.269561	0.392461	ENSRNOG00000020935	Capn1	calpain 1 [Source:RGD Symbol;Acc:2267]
ENSRNOG00000019202	62.9933	-0.0617118	0.219323	-0.281375	0.778423	0.848652	ENSRNOG00000019202	Pvr	PVR cell adhesion molecule [Source:RGD Symbol;Acc:3813]
ENSRNOG00000025245	292.937	-0.0183317	0.101665	-0.180315	0.856905	0.905487	ENSRNOG00000025245	RGD1311946	similar to RIKEN cDNA 1810055G02 [Source:RGD Symbol;Acc:1311946]
ENSRNOG00000018018	6692.22	-0.0477825	0.059279	-0.80606	0.420208	0.546625	ENSRNOG00000018018	Kcnip2	potassium voltage-gated channel interacting protein 2 [Source:RGD Symbol;Acc:70887]
ENSRNOG00000020996	1068.29	-0.416014	0.108396	-3.83792	0.000124083	0.000603577	ENSRNOG00000020996	Vps51	VPS51 subunit of GARP complex [Source:RGD Symbol;Acc:2319165]
ENSRNOG00000027487	2800.79	-0.0563766	0.0454536	-1.24031	0.21486	0.328163	ENSRNOG00000027487	Trim28	tripartite motif-containing 28 [Source:RGD Symbol;Acc:620289]
ENSRNOG00000070897	2802.42	-0.117835	0.0431707	-2.72952	0.00634267	0.0181698	ENSRNOG00000070897	Rab1b	RAB1B, member RAS oncogene family [Source:RGD Symbol;Acc:1642882]
ENSRNOG00000020957	57.3674	-0.248339	0.226017	-1.09877	0.27187	0.39513	ENSRNOG00000020957	Igflr1	IGF-like family receptor 1 [Source:RGD Symbol;Acc:1563574]
ENSRNOG00000052664	4221.13	0.484609	0.0739592	6.55239	5.66225e-11	1.21783e-09	ENSRNOG00000052664	Tnks2	tankyrase 2 [Source:RGD Symbol;Acc:1305026]
ENSRNOG00000012782	214.735	-0.206724	0.137613	-1.50222	0.133041	0.224534	ENSRNOG00000012782	Cemip2	cell migration inducing hyaluronidase 2 [Source:RGD Symbol;Acc:1307941]
ENSRNOG00000022153	839.001	-0.2553	0.0734678	-3.475	0.000510863	0.00207679	ENSRNOG00000022153	Tmem134	transmembrane protein 134 [Source:RGD Symbol;Acc:1305824]
ENSRNOG00000043328	1679.48	-0.131723	0.0598677	-2.20023	0.0277903	0.0629873	ENSRNOG00000043328	Chmp2a	charged multivesicular body protein 2A [Source:RGD Symbol;Acc:1305050]
ENSRNOG00000012346	4553.97	-0.0396494	0.044548	-0.890038	0.373446	0.501101	ENSRNOG00000012346	Epb41l2	erythrocyte membrane protein band 4.1-like 2 [Source:RGD Symbol;Acc:1563977]
ENSRNOG00000020299	3661.55	0.0560492	0.0607786	0.922187	0.356431	0.48427	ENSRNOG00000020299	Klc2	kinesin light chain 2 [Source:RGD Symbol;Acc:1307377]
ENSRNOG00000027514	4149.83	-0.0986005	0.060753	-1.62297	0.104595	0.185886	ENSRNOG00000027514	Ube2m	ubiquitin-conjugating enzyme E2M [Source:RGD Symbol;Acc:1307614]
ENSRNOG00000018847	939.719	0.00250402	0.0698878	0.0358292	0.971419	0.98246	ENSRNOG00000018847	Stx5	syntaxin 5 [Source:RGD Symbol;Acc:68426]
ENSRNOG00000021179	485.679	0.0804853	0.118622	0.678502	0.497454	0.619698	ENSRNOG00000021179	Naa40	N(alpha)-acetyltransferase 40, NatD catalytic subunit [Source:RGD Symbol;Acc:1565838]
ENSRNOG00000055525	1263.62	-0.52423	0.114506	-4.57817	4.69055e-06	3.2933e-05	ENSRNOG00000055525	Kmt2b	lysine methyltransferase 2B [Source:RGD Symbol;Acc:7678027]
ENSRNOG00000027550	176.55	-0.468517	0.172776	-2.71171	0.00669381	0.0190118	ENSRNOG00000027550	Mzf1	myeloid zinc finger 1 [Source:RGD Symbol;Acc:1308391]
ENSRNOG00000020620	156.047	0.0274598	0.143951	0.190758	0.848715	0.900078	ENSRNOG00000020620	Ppp1r32	protein phosphatase 1, regulatory subunit 32 [Source:RGD Symbol;Acc:708532]
ENSRNOG00000018086	549.956	-0.794873	0.102481	-7.75633	8.74215e-15	4.16171e-13	ENSRNOG00000018086	Slc22a8	solute carrier family 22 member 8 [Source:RGD Symbol;Acc:632286]
ENSRNOG00000013387	216.776	-0.920671	0.13177	-6.98695	2.8093e-12	8.09122e-11	ENSRNOG00000013387	Tpcn2	two pore segment channel 2 [Source:RGD Symbol;Acc:1311779]
ENSRNOG00000015232	188.952	0.522663	0.125582	4.16192	3.15583e-05	0.00018012	ENSRNOG00000015232	Pip5k1b	phosphatidylinositol-4-phosphate 5-kinase type 1 beta [Source:RGD Symbol;Acc:1310914]
ENSRNOG00000024309	3827.72	-0.245103	0.0611672	-4.00709	6.14709e-05	0.000324917	ENSRNOG00000024309	Cox6b1	cytochrome c oxidase subunit 6B1 [Source:RGD Symbol;Acc:1584097]
ENSRNOG00000019069	2298.64	-0.0769074	0.0781431	-0.984186	0.325024	0.453172	ENSRNOG00000019069	Nxf1	nuclear RNA export factor 1 [Source:RGD Symbol;Acc:62014]
ENSRNOG00000048337	715.054	0.192505	0.0798346	2.41129	0.0158961	0.0394644	ENSRNOG00000048337	Hnrnpr-ps2	heterogeneous nuclear ribonucleoprotein R, pseudogene 2 [Source:RGD Symbol;Acc:7597569]
ENSRNOG00000017448	44.514	-0.534042	0.263296	-2.0283	0.0425301	0.0892391	ENSRNOG00000017448	Exoc3l2	exocyst complex component 3-like 2 [Source:RGD Symbol;Acc:1592539]
ENSRNOG00000022428	1514.57	-0.303163	0.0707816	-4.28307	1.84329e-05	0.000112068	ENSRNOG00000022428	Flrt1	fibronectin leucine rich transmembrane protein 1 [Source:RGD Symbol;Acc:1565152]
ENSRNOG00000020350	1898.99	-0.0937568	0.0587271	-1.59648	0.110381	0.19432	ENSRNOG00000020350	Pacs1	phosphofurin acidic cluster sorting protein 1 [Source:RGD Symbol;Acc:620579]
ENSRNOG00000011815	3601.08	-0.224212	0.451543	-0.496546	0.619509	0.724546	ENSRNOG00000011815	Sgk1	serum/glucocorticoid regulated kinase 1 [Source:RGD Symbol;Acc:3668]
ENSRNOG00000017463	117.421	-0.0494368	0.148684	-0.332497	0.739514	0.820475	ENSRNOG00000017463	Bloc1s3	biogenesis of lysosomal organelles complex-1, subunit 3 [Source:RGD Symbol;Acc:1591724]
ENSRNOG00000021573	4604.2	-0.0753135	0.055204	-1.36428	0.17248	0.276201	ENSRNOG00000021573	Dpy19l3	dpy-19 like C-mannosyltransferase 3 [Source:RGD Symbol;Acc:1308334]
ENSRNOG00000017468	189.626	-0.654903	0.16428	-3.9865	6.70556e-05	0.000350471	ENSRNOG00000017468	Trappc6a	trafficking protein particle complex subunit 6A [Source:RGD Symbol;Acc:1591735]
ENSRNOG00000019266	419.706	-0.127166	0.0981276	-1.29593	0.195	0.304551	ENSRNOG00000019266	Tmem223	transmembrane protein 223 [Source:RGD Symbol;Acc:1582829]
ENSRNOG00000043378	39.9144	-0.496688	0.263551	-1.8846	0.059484	0.117304	ENSRNOG00000043378	Nkpd1	NTPase, KAP family P-loop domain containing 1 [Source:RGD Symbol;Acc:1591760]
ENSRNOG00000013565	313.885	0.0976321	0.104892	0.930786	0.351964	0.479552	ENSRNOG00000013565	Zfp507	zinc finger protein 507 [Source:RGD Symbol;Acc:1307017]
ENSRNOG00000019341	150.724	-0.0198137	0.148048	-0.133833	0.893535	0.929441	ENSRNOG00000019341	Tmem179b	transmembrane protein 179B [Source:RGD Symbol;Acc:1582850]
ENSRNOG00000070696	23.2259	0.630066	0.380819	1.65451	0.0980249	0.176051	ENSRNOG00000070696
ENSRNOG00000019965	197.168	-0.401319	0.122977	-3.26337	0.00110094	0.00406442	ENSRNOG00000019965	Tgfb1i1	transforming growth factor beta 1 induced transcript 1 [Source:RGD Symbol;Acc:620173]
ENSRNOG00000017692	2339.51	-0.592469	0.17129	-3.45887	0.000542437	0.00219501	ENSRNOG00000017692	Ppp1r37	protein phosphatase 1, regulatory subunit 37 [Source:RGD Symbol;Acc:1595870]
ENSRNOG00000017980	63.3947	0.29188	0.235068	1.24168	0.214354	0.32749	ENSRNOG00000017980	Itgal	integrin subunit alpha L [Source:RGD Symbol;Acc:631424]
ENSRNOG00000016371	520.188	0.189745	0.075743	2.50512	0.0122411	0.0317177	ENSRNOG00000016371	Slc18b1	solute carrier family 18 member B1 [Source:RGD Symbol;Acc:1306962]
ENSRNOG00000019419	230.408	-0.301909	0.139026	-2.17159	0.0298863	0.0666982	ENSRNOG00000019419	Taf6l	TATA-box binding protein associated factor 6 like [Source:RGD Symbol;Acc:1310123]
ENSRNOG00000020552	118.628	-0.143704	0.14655	-0.980578	0.326801	0.454802	ENSRNOG00000020552	Fosl1	FOS like 1, AP-1 transcription factor subunit [Source:RGD Symbol;Acc:2627]
ENSRNOG00000047061	29.5747	0.254502	0.305699	0.832525	0.405113	0.531942	ENSRNOG00000047061	Zfp773-ps1	zinc finger protein 773, pseudogene 1 [Source:RGD Symbol;Acc:1563793]
ENSRNOG00000016627	257.702	0.222285	0.13447	1.65304	0.0983222	0.176437	ENSRNOG00000016627	Eya4	EYA transcriptional coactivator and phosphatase 4 [Source:RGD Symbol;Acc:1307099]
ENSRNOG00000021828	2366.63	-0.184879	0.0567287	-3.259	0.00111805	0.00411032	ENSRNOG00000021828	Coro1b	coronin 1B [Source:RGD Symbol;Acc:2382]
ENSRNOG00000022742	296.529	0.159556	0.102766	1.55262	0.120515	0.20802	ENSRNOG00000022742	Zfp954	zinc finger protein 954 [Source:RGD Symbol;Acc:1561308]
ENSRNOG00000016280	1082.41	-0.0411218	0.0649707	-0.632928	0.526781	0.646496	ENSRNOG00000016280	Btrc	beta-transducin repeat containing E3 ubiquitin protein ligase [Source:RGD Symbol;Acc:1359721]
ENSRNOG00000016883	55.5945	-0.373203	0.216217	-1.72606	0.0843363	0.155598	ENSRNOG00000016883	Entpd7	ectonucleoside triphosphate diphosphohydrolase 7 [Source:RGD Symbol;Acc:1310638]
ENSRNOG00000024065	165.85	-0.835616	0.194008	-4.30713	1.6539e-05	0.000102075	ENSRNOG00000024065	Zfp575	zinc finger protein 575 [Source:RGD Symbol;Acc:1305025]
ENSRNOG00000012122	170.454	0.856797	0.192672	4.44693	8.71074e-06	5.71339e-05	ENSRNOG00000012122	Clvs2	clavesin 2 [Source:RGD Symbol;Acc:1306801]
ENSRNOG00000017412	63.8509	0.339701	0.285851	1.18838	0.234682	0.351365	ENSRNOG00000017412	AABR07001512.1
ENSRNOG00000013847	549.174	-0.211821	0.0817084	-2.5924	0.00953095	0.0256146	ENSRNOG00000013847	Nova2	NOVA alternative splicing regulator 2 [Source:RGD Symbol;Acc:1308032]
ENSRNOG00000059500	71.7117	-0.0861808	0.207294	-0.415742	0.677599	0.773187	ENSRNOG00000059500	Cdkn1c	cyclin-dependent kinase inhibitor 1C [Source:RGD Symbol;Acc:727892]
ENSRNOG00000048495	424.683	-0.322366	0.115918	-2.78098	0.00541945	0.0159186	ENSRNOG00000048495	Rrp12	ribosomal RNA processing 12 [Source:RGD Symbol;Acc:1591867]
ENSRNOG00000013323	237.99	0.104416	0.101264	1.03113	0.302481	0.429391	ENSRNOG00000013323	Rnf217	ring finger protein 217 [Source:RGD Symbol;Acc:1306836]
ENSRNOG00000020388	2185.67	0.0722763	0.0817096	0.88455	0.376399	0.503855	ENSRNOG00000020388	Inpp5f	inositol polyphosphate-5-phosphatase F [Source:RGD Symbol;Acc:1305777]
ENSRNOG00000013965	459.783	0.190026	0.0851792	2.23089	0.0256883	0.0588578	ENSRNOG00000013965	Noc3l	NOC3-like DNA replication regulator [Source:RGD Symbol;Acc:1560656]
ENSRNOG00000029608	3651.47	0.165173	0.0726105	2.27478	0.022919	0.0535972	ENSRNOG00000029608	Nkain2	sodium/potassium transporting ATPase interacting 2 [Source:RGD Symbol;Acc:7740967]
ENSRNOG00000017419	706.917	-0.0981059	0.0847182	-1.15803	0.246854	0.36585	ENSRNOG00000017419	Map3k4	mitogen activated protein kinase kinase kinase 4 [Source:RGD Symbol;Acc:1311192]
ENSRNOG00000021102	3227.97	0.0126089	0.0702845	0.179399	0.857625	0.905779	ENSRNOG00000021102	Scn1b	sodium voltage-gated channel beta subunit 1 [Source:RGD Symbol;Acc:3631]
ENSRNOG00000014928	943.67	-0.141562	0.098383	-1.43889	0.150183	0.247268	ENSRNOG00000014928	Apba1	amyloid beta precursor protein binding family A member 1 [Source:RGD Symbol;Acc:620844]
ENSRNOG00000015465	41.192	0.11125	0.278846	0.398967	0.689918	0.78294	ENSRNOG00000015465	Cep72	centrosomal protein 72 [Source:RGD Symbol;Acc:1566336]
ENSRNOG00000014786	141.349	0.251698	0.14065	1.78953	0.0735294	0.139482	ENSRNOG00000014786	Ccne1	cyclin E1 [Source:RGD Symbol;Acc:2294]
ENSRNOG00000019596	613.579	-0.208063	0.125818	-1.65368	0.0981921	0.176278	ENSRNOG00000019596	Smg9	SMG9 nonsense mediated mRNA decay factor [Source:RGD Symbol;Acc:1309888]
ENSRNOG00000017230	1206.97	0.250824	0.0626418	4.0041	6.2253e-05	0.000328471	ENSRNOG00000017230	Cox15	cytochrome c oxidase assembly homolog COX15 [Source:RGD Symbol;Acc:1312043]
ENSRNOG00000014485	945.737	0.0672488	0.0671479	1.0015	0.316583	0.444013	ENSRNOG00000014485	Pdcd6	programmed cell death 6 [Source:RGD Symbol;Acc:1311239]
ENSRNOG00000021098	3502.52	-0.134171	0.0975562	-1.37532	0.169031	0.271803	ENSRNOG00000021098	Rasgrp2	RAS guanyl releasing protein 2 [Source:RGD Symbol;Acc:1311630]
ENSRNOG00000051051	243.56	0.271698	0.110639	2.45571	0.0140605	0.0356594	ENSRNOG00000051051	Pabir1	PP2A Aalpha (PPP2R1A) and B55A (PPP2R2A) interacting phosphatase regulator 1 [Source:RGD Symbol;Acc:1310316]
ENSRNOG00000011584	415.67	-0.0107335	0.0840937	-0.127637	0.898436	0.932886	ENSRNOG00000011584	Gpatch1	G patch domain containing 1 [Source:RGD Symbol;Acc:1308935]
ENSRNOG00000024243	5659.56	-0.28219	0.0589923	-4.7835	1.72268e-06	1.36753e-05	ENSRNOG00000024243	Cadm4	cell adhesion molecule 4 [Source:RGD Symbol;Acc:1304722]
ENSRNOG00000015912	2093.46	-0.0727237	0.0471855	-1.54123	0.123261	0.211467	ENSRNOG00000015912	Ptdss2	phosphatidylserine synthase 2 [Source:RGD Symbol;Acc:1307914]
ENSRNOG00000020598	27.789	0.47104	0.319793	1.47295	0.140764	0.235178	ENSRNOG00000020598	Kcnk6	potassium two pore domain channel subfamily K member 6 [Source:RGD Symbol;Acc:621450]
ENSRNOG00000028247	1175.22	-0.0796131	0.0750489	-1.06082	0.288774	0.413586	ENSRNOG00000028247	Ankrd13d	ankyrin repeat domain 13D [Source:RGD Symbol;Acc:1309156]
ENSRNOG00000016434	215.425	-0.591624	0.159402	-3.71152	0.000206015	0.000942409	ENSRNOG00000016434	Prkd2	protein kinase D2 [Source:RGD Symbol;Acc:1308054]
ENSRNOG00000013331	7088.42	0.151784	0.0450411	3.36989	0.000751975	0.00291962	ENSRNOG00000013331	Sdha	succinate dehydrogenase complex flavoprotein subunit A [Source:RGD Symbol;Acc:621557]
ENSRNOG00000036592	245.126	0.300073	0.150179	1.9981	0.0457053	0.0946002	ENSRNOG00000036592	Zfp518a	zinc finger protein 518A [Source:RGD Symbol;Acc:1305314]
ENSRNOG00000021067	184.787	-0.716704	0.17745	-4.0389	5.37028e-05	0.000288241	ENSRNOG00000021067	Fxyd7	FXYD domain-containing ion transport regulator 7 [Source:RGD Symbol;Acc:620830]
ENSRNOG00000021175	418.9	-0.0770346	0.0952919	-0.808406	0.418857	0.545247	ENSRNOG00000021175	Otub1	OTU deubiquitinase, ubiquitin aldehyde binding 1 [Source:RGD Symbol;Acc:1311329]
ENSRNOG00000018137	801.95	-0.0303246	0.0811239	-0.373806	0.708549	0.797775	ENSRNOG00000018137	Tubgcp2	tubulin, gamma complex associated protein 2 [Source:RGD Symbol;Acc:1309597]
ENSRNOG00000021644	131.575	-0.459649	0.149237	-3.08	0.00207001	0.00701837	ENSRNOG00000021644	Slc15a3	solute carrier family 15 member 3 [Source:RGD Symbol;Acc:628663]
ENSRNOG00000014163	345.204	-0.417561	0.122473	-3.40943	0.000650996	0.00256825	ENSRNOG00000014163	Zfp536	zinc finger protein 536 [Source:RGD Symbol;Acc:1563363]
ENSRNOG00000057569	1636.54	-0.648726	0.124185	-5.22387	1.75219e-07	1.77692e-06	ENSRNOG00000057569	Ahnak	AHNAK nucleoprotein [Source:RGD Symbol;Acc:619779]
ENSRNOG00000019915	1337.25	-0.504077	0.132951	-3.79144	0.000149778	0.000708507	ENSRNOG00000019915	Xrcc1	X-ray repair cross complementing 1 [Source:RGD Symbol;Acc:619823]
ENSRNOG00000017164	429.855	-0.522813	0.10577	-4.94291	7.69643e-07	6.68485e-06	ENSRNOG00000017164	Afap1l2	actin filament associated protein 1-like 2 [Source:RGD Symbol;Acc:1310668]
ENSRNOG00000020781	1150.44	-0.123153	0.074467	-1.65379	0.0981696	0.176269	ENSRNOG00000020781	Tbcb	tubulin folding cofactor B [Source:RGD Symbol;Acc:1309965]
ENSRNOG00000021338	4271.27	-0.506952	0.113533	-4.46524	7.99772e-06	5.27814e-05	ENSRNOG00000021338	Tmem132a	transmembrane protein 132A [Source:RGD Symbol;Acc:727936]
ENSRNOG00000032042	607.177	-0.231141	0.0772463	-2.99226	0.00276922	0.00899875	ENSRNOG00000032042	Zfta	zinc finger translocation associated [Source:RGD Symbol;Acc:1560108]
ENSRNOG00000014190	368.578	0.179595	0.0986608	1.82033	0.0687093	0.131844	ENSRNOG00000014190	Hint3	histidine triad nucleotide binding protein 3 [Source:RGD Symbol;Acc:621603]
ENSRNOG00000018985	2484.65	-0.274847	0.0666542	-4.12348	3.73193e-05	0.000208075	ENSRNOG00000018985	Grk2	G protein-coupled receptor kinase 2 [Source:RGD Symbol;Acc:2062]
ENSRNOG00000020799	280.598	-0.187051	0.116851	-1.60076	0.109429	0.192941	ENSRNOG00000020799	Polr2i	RNA polymerase II subunit I [Source:RGD Symbol;Acc:1309395]
ENSRNOG00000036641	24.81	-0.497831	0.287142	-1.73374	0.082964	0.153559	ENSRNOG00000036641	LOC689065	RIKEN cDNA 2010003K11 gene [Source:MGI Symbol;Acc:MGI:1917111]
ENSRNOG00000022485	744.909	0.320398	0.0781077	4.102	4.09601e-05	0.00022593	ENSRNOG00000022485	Chuk	component of inhibitor of nuclear factor kappa B kinase complex [Source:RGD Symbol;Acc:1306661]
ENSRNOG00000069113	1903.69	-0.196581	0.0558578	-3.51931	0.000432664	0.00179552	ENSRNOG00000069113	Rpl26-ps2	ribosomal protein L26, pseudogene 2 [Source:RGD Symbol;Acc:1565215]
ENSRNOG00000066174	50.8798	0.133889	0.256395	0.5222	0.601531	0.708956	ENSRNOG00000066174
ENSRNOG00000018272	207.136	-0.286805	0.118331	-2.42375	0.0153611	0.0383817	ENSRNOG00000018272	Zfp511	zinc finger protein 511 [Source:RGD Symbol;Acc:1308585]
ENSRNOG00000066988	100.257	-0.139584	0.15502	-0.900426	0.367894	0.495506	ENSRNOG00000066988	Tbpl1	TATA-box binding protein like 1 [Source:RGD Symbol;Acc:1597456]
ENSRNOG00000024677	4046.66	-0.818745	0.161089	-5.08255	3.72399e-07	3.48131e-06	ENSRNOG00000024677	Arhgap33	Rho GTPase activating protein 33 [Source:RGD Symbol;Acc:2318374]
ENSRNOG00000016416	978.439	-0.0754846	0.0764604	-0.987238	0.323526	0.451505	ENSRNOG00000016416	Rnh1	ribonuclease/angiogenin inhibitor 1 [Source:RGD Symbol;Acc:621398]
ENSRNOG00000011114	51.3397	1.38462	0.227173	6.095	1.09441e-09	1.80565e-08	ENSRNOG00000011114	Tbpl1	TATA-box binding protein like 1 [Source:RGD Symbol;Acc:1597456]
ENSRNOG00000030572	948.559	0.602669	0.0730211	8.25335	1.54017e-16	9.67329e-15	ENSRNOG00000030572	Smc5	structural maintenance of chromosomes 5 [Source:RGD Symbol;Acc:1307492]
ENSRNOG00000017731	1630.9	-0.0700969	0.0927168	-0.756032	0.44963	0.575927	ENSRNOG00000017731	Agpat4	1-acylglycerol-3-phosphate O-acyltransferase 4 [Source:RGD Symbol;Acc:619916]
ENSRNOG00000020689	740.857	0.838938	0.135266	6.20215	5.5697e-10	9.79482e-09	ENSRNOG00000020689	Cpeb3	cytoplasmic polyadenylation element binding protein 3 [Source:RGD Symbol;Acc:1564670]
ENSRNOG00000021202	19186.3	0.284375	0.0468562	6.0691	1.28627e-09	2.09903e-08	ENSRNOG00000021202	Rtn3	reticulon 3 [Source:RGD Symbol;Acc:620988]
ENSRNOG00000011161	187.303	-0.12248	0.135883	-0.901362	0.367396	0.495162	ENSRNOG00000011161	Slc2a12	solute carrier family 2 member 12 [Source:RGD Symbol;Acc:1310175]
ENSRNOG00000017298	192.576	-0.0861696	0.115991	-0.7429	0.457542	0.583164	ENSRNOG00000017298	Cutc	cutC copper transporter [Source:RGD Symbol;Acc:1304966]
ENSRNOG00000013364	184.105	-0.147663	0.1593	-0.92695	0.353953	0.481383	ENSRNOG00000013364	Hey2	hes-related family bHLH transcription factor with YRPW motif 2 [Source:RGD Symbol;Acc:621405]
ENSRNOG00000021137	307.15	-0.610659	0.101798	-5.99876	1.98829e-09	3.12852e-08	ENSRNOG00000021137	Kctd15	potassium channel tetramerization domain containing 15 [Source:RGD Symbol;Acc:1583737]
ENSRNOG00000020480	5518.81	-0.691873	0.0689352	-10.0366	1.05281e-23	2.76094e-21	ENSRNOG00000020480	Fads1	fatty acid desaturase 1 [Source:RGD Symbol;Acc:621678]
ENSRNOG00000036598	701.117	0.46588	0.0765102	6.08912	1.13531e-09	1.87107e-08	ENSRNOG00000036598	Tbc1d12	TBC1 domain family, member 12 [Source:RGD Symbol;Acc:9377071]
ENSRNOG00000014240	85.1995	0.093745	0.164163	0.571047	0.567968	0.68125	ENSRNOG00000014240	Trmt11	tRNA methyltransferase 11 homolog [Source:RGD Symbol;Acc:727798]
ENSRNOG00000020394	511.799	-0.0597936	0.0817041	-0.731831	0.464271	0.589528	ENSRNOG00000020394	Mcmbp	minichromosome maintenance complex binding protein [Source:RGD Symbol;Acc:1306730]
ENSRNOG00000019968	1896.65	-0.214439	0.0698222	-3.07121	0.00213192	0.00720993	ENSRNOG00000019968	Trim8	tripartite motif-containing 8 [Source:RGD Symbol;Acc:1585223]
ENSRNOG00000063244	2098.5	-0.185341	0.430035	-0.43099	0.666475	0.764521	ENSRNOG00000063244	Mpeg1	macrophage expressed 1 [Source:RGD Symbol;Acc:69275]
ENSRNOG00000021144	1113.41	0.194166	0.0649629	2.98888	0.00280002	0.00907912	ENSRNOG00000021144	Cebpg	CCAAT/enhancer binding protein gamma [Source:RGD Symbol;Acc:2330]
ENSRNOG00000011588	1002.01	0.184351	0.0682424	2.70141	0.00690458	0.0195177	ENSRNOG00000011588	Rnf146	ring finger protein 146 [Source:RGD Symbol;Acc:1306482]
ENSRNOG00000018337	3810.11	0.0101676	0.0834373	0.12186	0.90301	0.93589	ENSRNOG00000018337	Caly	calcyon neuron-specific vesicular protein [Source:RGD Symbol;Acc:621719]
ENSRNOG00000028017	690.566	-0.144067	0.0715417	-2.01375	0.0440358	0.0917912	ENSRNOG00000028017	Tmem109	transmembrane protein 109 [Source:RGD Symbol;Acc:1359538]
ENSRNOG00000020514	122.03	-0.00574002	0.156904	-0.036583	0.970818	0.982052	ENSRNOG00000020514	Sox6	SRY-box transcription factor 6 [Source:RGD Symbol;Acc:1309000]
ENSRNOG00000018237	4205.21	-0.0669127	0.0738266	-0.90635	0.364751	0.492618	ENSRNOG00000018237	Gstp1	glutathione S-transferase pi 1 [Source:RGD Symbol;Acc:2758]
ENSRNOG00000027724	184.401	-0.696934	0.420267	-1.65831	0.0972544	0.174899	ENSRNOG00000027724	Plekhf1	pleckstrin homology and FYVE domain containing 1 [Source:RGD Symbol;Acc:1310544]
ENSRNOG00000011622	1133.03	0.0178053	0.0850973	0.209235	0.834265	0.8905	ENSRNOG00000011622	Echdc1	ethylmalonyl-CoA decarboxylase 1 [Source:RGD Symbol;Acc:1359654]
ENSRNOG00000019112	25.2545	-0.11091	0.301405	-0.367977	0.712891	0.801707	ENSRNOG00000019112	Chp2	calcineurin-like EF hand protein 2 [Source:RGD Symbol;Acc:727796]
ENSRNOG00000021119	121.551	-0.0724755	0.150714	-0.480881	0.630601	0.734187	ENSRNOG00000021119	Pdcd2l	programmed cell death 2-like [Source:RGD Symbol;Acc:1589941]
ENSRNOG00000019311	130.667	-0.537287	0.17665	-3.04153	0.00235381	0.00783275	ENSRNOG00000019311	Nfkb2	nuclear factor kappa B subunit 2 [Source:RGD Symbol;Acc:1307189]
ENSRNOG00000055547	111.318	-0.111271	0.163261	-0.681553	0.495521	0.618015	ENSRNOG00000055547	Prkn	parkin RBR E3 ubiquitin protein ligase [Source:RGD Symbol;Acc:61797]
ENSRNOG00000021086	110.484	-0.324782	0.165704	-1.96002	0.049994	0.101633	ENSRNOG00000021086	Dtx4	deltex E3 ubiquitin ligase 4 [Source:RGD Symbol;Acc:1311767]
ENSRNOG00000013938	106.51	0.228683	0.158678	1.44118	0.149533	0.246476	ENSRNOG00000013938	Tshz3	teashirt zinc finger homeobox 3 [Source:RGD Symbol;Acc:1306322]
ENSRNOG00000064485	115.66	0.135987	0.148733	0.914306	0.360556	0.488276	ENSRNOG00000064485	Znf431l-ps8	zinc finger protein 431 like, pseudogene 8 [Source:RGD Symbol;Acc:7704592]
ENSRNOG00000019435	6873.13	-0.879117	0.166078	-5.29341	1.20058e-07	1.25939e-06	ENSRNOG00000019435	Psd	pleckstrin and Sec7 domain containing [Source:RGD Symbol;Acc:620297]
ENSRNOG00000024266	236.476	-0.26996	0.137344	-1.96557	0.0493478	0.100648	ENSRNOG00000024266	Haus5	HAUS augmin-like complex, subunit 5 [Source:RGD Symbol;Acc:2318093]
ENSRNOG00000017414	131.178	1.09373	0.401217	2.72604	0.00641001	0.0183366	ENSRNOG00000017414	Irf7	interferon regulatory factor 7 [Source:RGD Symbol;Acc:1307828]
ENSRNOG00000018860	250.58	-0.0465828	0.0924891	-0.503657	0.614502	0.719986	ENSRNOG00000018860	Mtg1	mitochondrial ribosome-associated GTPase 1 [Source:RGD Symbol;Acc:6497155]
ENSRNOG00000016960	680.629	-0.0183958	0.0712396	-0.258225	0.796234	0.861906	ENSRNOG00000016960	Polr3e	RNA polymerase III subunit E [Source:RGD Symbol;Acc:1308086]
ENSRNOG00000042309	1484.77	0.503447	0.0758954	6.63343	3.27981e-11	7.47357e-10	ENSRNOG00000042309	Kiaa0408L	Kiaa0408-like [Source:RGD Symbol;Acc:1307525]
ENSRNOG00000019509	164.685	-0.664094	0.143413	-4.63064	3.64533e-06	2.64267e-05	ENSRNOG00000019509	Fbxl15	F-box and leucine-rich repeat protein 15 [Source:RGD Symbol;Acc:1306444]
ENSRNOG00000016166	179.79	0.0435268	0.126409	0.344332	0.730596	0.814207	ENSRNOG00000016166	Pdlim1	PDZ and LIM domain 1 [Source:RGD Symbol;Acc:68324]
ENSRNOG00000012324	523.628	-0.120868	0.0956917	-1.26309	0.206555	0.318447	ENSRNOG00000012324	Soga3	SOGA family member 3 [Source:RGD Symbol;Acc:11479453]
ENSRNOG00000019574	154.12	-0.231311	0.137657	-1.68035	0.0928896	0.168632	ENSRNOG00000019574	Cuedc2	CUE domain containing 2 [Source:RGD Symbol;Acc:1308096]
ENSRNOG00000017396	1163.48	0.592423	0.075931	7.80212	6.08756e-15	3.03323e-13	ENSRNOG00000017396	Marchf5	membrane associated ring-CH-type finger 5 [Source:RGD Symbol;Acc:1305617]
ENSRNOG00000028261	1201.52	-0.381141	0.111663	-3.41333	0.000641734	0.00253972	ENSRNOG00000028261	Tppp	tubulin polymerization promoting protein [Source:RGD Symbol;Acc:1310121]
ENSRNOG00000067971	1091.2	0.0859933	0.0647145	1.32881	0.183911	0.290541	ENSRNOG00000067971	Sprn	shadow of prion protein [Source:RGD Symbol;Acc:1561845]
ENSRNOG00000013971	6513.53	-0.283227	0.0531061	-5.33323	9.6483e-08	1.04585e-06	ENSRNOG00000013971	Psat1	phosphoserine aminotransferase 1 [Source:RGD Symbol;Acc:735170]
ENSRNOG00000019902	45.2496	-0.120881	0.270091	-0.447555	0.654474	0.755159	ENSRNOG00000019902	Folr1	folate receptor alpha [Source:RGD Symbol;Acc:71032]
ENSRNOG00000021054	1175.71	-0.0690481	0.0722764	-0.955333	0.339409	0.467274	ENSRNOG00000021054	Men1	menin 1 [Source:RGD Symbol;Acc:3078]
ENSRNOG00000025353	84.4485	0.245661	0.1608	1.52774	0.126577	0.215842	ENSRNOG00000025353	Ears2	glutamyl-tRNA synthetase 2, mitochondrial [Source:RGD Symbol;Acc:1307904]
ENSRNOG00000019936	531.887	0.0122141	0.0732067	0.166844	0.867493	0.912934	ENSRNOG00000019936	Anapc15	anaphase promoting complex subunit 15 [Source:RGD Symbol;Acc:1311634]
ENSRNOG00000021156	709.75	-0.391475	0.0881005	-4.44351	8.8504e-06	5.79736e-05	ENSRNOG00000021156	Vegfb	vascular endothelial growth factor B [Source:RGD Symbol;Acc:619799]
ENSRNOG00000028357	57.8907	0.251873	0.198949	1.26602	0.205507	0.317118	ENSRNOG00000028357	Lrrc14b	leucine rich repeat containing 14B [Source:RGD Symbol;Acc:1564978]
ENSRNOG00000066093	662.945	0.420912	0.0990342	4.25017	2.13608e-05	0.000127313	ENSRNOG00000066093	Ccdc127	coiled-coil domain containing 127 [Source:RGD Symbol;Acc:735106]
ENSRNOG00000015051	104.803	-0.143397	0.212448	-0.674975	0.499691	0.621827	ENSRNOG00000015051	Golga7b	golgin A7 family, member B [Source:RGD Symbol;Acc:1583839]
ENSRNOG00000021061	1303.65	-0.16688	0.0800402	-2.08495	0.037074	0.0795896	ENSRNOG00000021061	Map4k2	mitogen activated protein kinase kinase kinase kinase 2 [Source:RGD Symbol;Acc:1308199]
ENSRNOG00000014966	602.483	0.262981	0.072662	3.61923	0.000295479	0.00128845	ENSRNOG00000014966	LOC690000	similar to CG3740-PA [Source:RGD Symbol;Acc:1585208]
ENSRNOG00000020016	1597.52	-0.0580735	0.0535535	-1.0844	0.278187	0.402082	ENSRNOG00000020016	Lamtor1	RhoA activator C11orf59-like [Source:RGD Symbol;Acc:2319924]
ENSRNOG00000025327	62.9429	-0.0460329	0.226649	-0.203102	0.839055	0.894068	ENSRNOG00000025327	Tert	telomerase reverse transcriptase [Source:RGD Symbol;Acc:70494]
ENSRNOG00000063986	46.0577	0.652348	0.577642	1.12933	0.258759	0.380215	ENSRNOG00000063986
ENSRNOG00000015220	1241.06	-0.00709325	0.0652488	-0.108711	0.913432	0.942564	ENSRNOG00000015220	Crtac1	cartilage acidic protein 1 [Source:RGD Symbol;Acc:621085]
ENSRNOG00000020124	72.5585	-0.161196	0.220845	-0.729905	0.465448	0.590286	ENSRNOG00000020124	Lrrc51	leucine rich repeat containing 51 [Source:RGD Symbol;Acc:1565856]
ENSRNOG00000062358	74.6549	-0.149888	0.365606	-0.40997	0.681828	0.776649	ENSRNOG00000062358	Lilrb3l	leukocyte immunoglobulin like receptor B3 like [Source:RGD Symbol;Acc:1307219]
ENSRNOG00000062531	1306.69	-0.109326	0.0670964	-1.62939	0.10323	0.183897	ENSRNOG00000062531	Ndufs6l1	NADH:ubiquinone oxidoreductase subunit S6-like 1 [Source:RGD Symbol;Acc:1584802]
ENSRNOG00000020646	1659.43	0.186132	0.0647344	2.87532	0.00403613	0.0124115	ENSRNOG00000020646	Sdhaf2	succinate dehydrogenase complex assembly factor 2 [Source:RGD Symbol;Acc:1309216]
ENSRNOG00000043060	304.462	-0.285287	0.106552	-2.67746	0.00741834	0.0207503	ENSRNOG00000043060	Dnajc4	DnaJ heat shock protein family (Hsp40) member C4 [Source:RGD Symbol;Acc:1308693]
ENSRNOG00000017938	842.611	0.182971	0.090763	2.01592	0.0438085	0.0914338	ENSRNOG00000017938	Btaf1	B-TFIID TATA-box binding protein associated factor 1 [Source:RGD Symbol;Acc:1564130]
ENSRNOG00000039776	977.203	-0.0341235	0.0565822	-0.603079	0.546456	0.663668	ENSRNOG00000039776	Exoc3	exocyst complex component 3 [Source:RGD Symbol;Acc:621790]
ENSRNOG00000053659	2259.14	0.182925	0.0691783	2.64426	0.00818705	0.0225419	ENSRNOG00000053659	C1h11orf58	similar to human chromosome 11 open reading frame 58 [Source:RGD Symbol;Acc:1311703]
ENSRNOG00000000417	2684	-0.684853	0.125851	-5.44177	5.27545e-08	5.99677e-07	ENSRNOG00000000417	Numa1	nuclear mitotic apparatus protein 1 [Source:RGD Symbol;Acc:1308777]
ENSRNOG00000018243	1046.36	0.407441	0.0655404	6.21664	5.07917e-10	9.00633e-09	ENSRNOG00000018243	Ubfd1	ubiquitin family domain containing 1 [Source:RGD Symbol;Acc:1306614]
ENSRNOG00000015159	27.1579	0.731428	0.387258	1.88874	0.0589272	0.116406	ENSRNOG00000015159	Slc9a3	solute carrier family 9 member A3 [Source:RGD Symbol;Acc:3720]
ENSRNOG00000015213	262.821	-0.127311	0.101112	-1.2591	0.207993	0.320233	ENSRNOG00000015213	Fxn	frataxin [Source:RGD Symbol;Acc:1565754]
ENSRNOG00000027590	934.243	0.0624947	0.0703776	0.887991	0.374545	0.502175	ENSRNOG00000027590	Jakmip3	janus kinase and microtubule interacting protein 3 [Source:RGD Symbol;Acc:1307177]
ENSRNOG00000021203	380.965	0.341022	0.109485	3.11478	0.00184083	0.00633006	ENSRNOG00000021203	Atl3	atlastin GTPase 3 [Source:RGD Symbol;Acc:1309871]
ENSRNOG00000020150	143.311	-0.312138	0.161537	-1.9323	0.0533224	0.107008	ENSRNOG00000020150	Il18bp	interleukin 18 binding protein [Source:RGD Symbol;Acc:620042]
ENSRNOG00000019570	1684.3	0.134487	0.0647942	2.07561	0.0379303	0.0810829	ENSRNOG00000019570	Gng3	G protein subunit gamma 3 [Source:RGD Symbol;Acc:620805]
ENSRNOG00000021006	633.749	-0.18413	0.0746633	-2.46614	0.0136577	0.034835	ENSRNOG00000021006	Tmem147	transmembrane protein 147 [Source:RGD Symbol;Acc:1304706]
ENSRNOG00000068261	137.272	0.219826	0.142209	1.5458	0.122153	0.210006	ENSRNOG00000068261	Pacrg	parkin coregulated [Source:RGD Symbol;Acc:1561027]
ENSRNOG00000020009	224.316	-0.109158	0.761999	-0.143252	0.886091	0.925098	ENSRNOG00000020009	Npas4	neuronal PAS domain protein 4 [Source:RGD Symbol;Acc:628866]
ENSRNOG00000037380	249.08	0.360851	0.12004	3.00609	0.00264627	0.0086481	ENSRNOG00000037380	AC136661.1
ENSRNOG00000020175	339.729	0.165785	0.0940499	1.76273	0.0779456	0.146153	ENSRNOG00000020175	Rnf121	ring finger protein 121 [Source:RGD Symbol;Acc:1307857]
ENSRNOG00000018476	359.851	-0.197775	0.0902116	-2.19235	0.0283542	0.0640381	ENSRNOG00000018476	Fuom	fucose mutarotase [Source:RGD Symbol;Acc:1311186]
ENSRNOG00000052393	1321.51	0.0116363	0.0602255	0.193212	0.846793	0.898943	ENSRNOG00000052393	Bscl2	BSCL2 lipid droplet biogenesis associated, seipin [Source:RGD Symbol;Acc:1308135]
ENSRNOG00000048297	5056.82	0.340902	0.0910523	3.74403	0.000181094	0.000838859	ENSRNOG00000048297	Qki	QKI, KH domain containing RNA binding [Source:RGD Symbol;Acc:1584886]
ENSRNOG00000021164	3183.09	0.23239	0.0772407	3.00865	0.00262415	0.00857958	ENSRNOG00000021164	Stip1	stress-induced phosphoprotein 1 [Source:RGD Symbol;Acc:621599]
ENSRNOG00000020188	177.076	0.0847526	0.123956	0.68373	0.494146	0.616775	ENSRNOG00000020188	Trpc2	transient receptor potential cation channel subfamily C member 2 [Source:RGD Symbol;Acc:628819]
ENSRNOG00000021009	104.117	0.178835	0.166968	1.07107	0.284136	0.408235	ENSRNOG00000021009	Gapdhs	glyceraldehyde-3-phosphate dehydrogenase, spermatogenic [Source:RGD Symbol;Acc:620150]
ENSRNOG00000015676	1166.41	0.00242124	0.0601711	0.0402392	0.967902	0.980098	ENSRNOG00000015676	Brd9	bromodomain containing 9 [Source:RGD Symbol;Acc:1307359]
ENSRNOG00000018827	81.5861	0.753458	0.17837	4.22414	2.39857e-05	0.000141101	ENSRNOG00000018827	Htr7	5-hydroxytryptamine receptor 7 [Source:RGD Symbol;Acc:71034]
ENSRNOG00000018129	1305.8	0.0844447	0.0699227	1.20769	0.227167	0.343069	ENSRNOG00000018129	Ndufab1	NADH:ubiquinone oxidoreductase subunit AB1 [Source:RGD Symbol;Acc:1305619]
ENSRNOG00000021015	109.097	-0.177647	0.201698	-0.88076	0.378448	0.506042	ENSRNOG00000021015	Sbsn	suprabasin [Source:RGD Symbol;Acc:1562305]
ENSRNOG00000020668	2051.38	0.0553546	0.059433	0.931379	0.351658	0.479309	ENSRNOG00000020668	Cpsf7	cleavage and polyadenylation specific factor 7 [Source:RGD Symbol;Acc:1305441]
ENSRNOG00000014037	27.8379	0.311808	0.309788	1.00652	0.314165	0.441491	ENSRNOG00000014037	Dcun1d3	defective in cullin neddylation 1 domain containing 3 [Source:RGD Symbol;Acc:1308893]
ENSRNOG00000013443	2490.34	0.346437	0.0740625	4.67763	2.90213e-06	2.16472e-05	ENSRNOG00000013443	Tm9sf3	transmembrane 9 superfamily member 3 [Source:RGD Symbol;Acc:1564625]
ENSRNOG00000019302	1307.2	-0.264992	0.070947	-3.73507	0.000187664	0.00086714	ENSRNOG00000019302	Stx4	syntaxin 4 [Source:RGD Symbol;Acc:621019]
ENSRNOG00000021079	928.815	-0.43947	0.105901	-4.14982	3.32743e-05	0.000188636	ENSRNOG00000021079	Fxyd1	FXYD domain-containing ion transport regulator 1 [Source:RGD Symbol;Acc:69306]
ENSRNOG00000069673	757.38	-0.413068	0.122489	-3.37228	0.000745475	0.00289588	ENSRNOG00000069673	Pnpla2	patatin-like phospholipase domain containing 2 [Source:RGD Symbol;Acc:1309044]
ENSRNOG00000021158	159.347	-0.0957811	0.14262	-0.671583	0.501849	0.623993	ENSRNOG00000021158	Nudt22	nudix hydrolase 22 [Source:RGD Symbol;Acc:735224]
ENSRNOG00000021087	2537.57	-0.742588	0.0643705	-11.5361	8.67223e-31	8.64216e-28	ENSRNOG00000021087	Lgi4	leucine-rich repeat LGI family, member 4 [Source:RGD Symbol;Acc:735035]
ENSRNOG00000017469	113.138	-0.333945	0.156271	-2.13696	0.0326012	0.0716505	ENSRNOG00000017469	Anxa1	annexin A1 [Source:RGD Symbol;Acc:2118]
ENSRNOG00000011310	5268.08	0.382937	0.100812	3.79851	0.000145568	0.000691436	ENSRNOG00000011310	Pde10a	phosphodiesterase 10A [Source:RGD Symbol;Acc:68434]
ENSRNOG00000023023	123.613	-0.178911	0.137602	-1.30021	0.193529	0.302759	ENSRNOG00000023023	Trpt1	tRNA phosphotransferase 1 [Source:RGD Symbol;Acc:1310831]
ENSRNOG00000021161	115.214	-0.387514	0.1539	-2.51796	0.0118038	0.030793	ENSRNOG00000021161	Fermt3	FERM domain containing kindlin 3 [Source:RGD Symbol;Acc:1310168]
ENSRNOG00000014463	783.12	0.22171	0.0689865	3.21381	0.00130985	0.00471346	ENSRNOG00000014463	Uri1	URI1, prefoldin-like chaperone [Source:RGD Symbol;Acc:1310358]
ENSRNOG00000018367	2235.01	-0.0667475	0.0664065	-1.00513	0.314832	0.442179	ENSRNOG00000018367	Taldo1	transaldolase 1 [Source:RGD Symbol;Acc:620674]
ENSRNOG00000015321	878.727	-0.0378592	0.103827	-0.364636	0.715383	0.803603	ENSRNOG00000015321	Moxd1	monooxygenase, DBH-like 1 [Source:RGD Symbol;Acc:1310033]
ENSRNOG00000027646	645.996	0.120098	0.0755706	1.58921	0.112013	0.196591	ENSRNOG00000027646	Pop4	POP4 homolog, ribonuclease P/MRP subunit [Source:RGD Symbol;Acc:1305955]
ENSRNOG00000011399	20.5212	0.542428	0.353603	1.534	0.12503	0.213691	ENSRNOG00000011399	LOC100912436	uncharacterized LOC100912436 [Source:RGD Symbol;Acc:6486936]
ENSRNOG00000024172	83.4101	-0.248173	0.184355	-1.34617	0.178248	0.283512	ENSRNOG00000024172	T2	brachyury 2 [Source:RGD Symbol;Acc:1597985]
ENSRNOG00000011885	323.669	-0.268455	0.120721	-2.22377	0.0261641	0.059774	ENSRNOG00000011885	Rhpn2	rhophilin, Rho GTPase binding protein 2 [Source:RGD Symbol;Acc:1308366]
ENSRNOG00000019807	548.832	-0.178253	0.0760393	-2.34422	0.0190671	0.0459552	ENSRNOG00000019807	Sufu	SUFU negative regulator of hedgehog signaling [Source:RGD Symbol;Acc:1559462]
ENSRNOG00000070586	1448.82	-0.189426	0.0792292	-2.39086	0.0168088	0.041332	ENSRNOG00000070586	Prr18	proline rich 18 [Source:RGD Symbol;Acc:1564079]
ENSRNOG00000033517	300.75	-0.0716647	0.500623	-0.143151	0.886171	0.925098	ENSRNOG00000033517	LOC100360791	tumor protein, translationally-controlled 1 [Source:RGD Symbol;Acc:2321467]
ENSRNOG00000060849	314.659	-0.313197	0.117077	-2.67515	0.00746966	0.0208743	ENSRNOG00000060849	Rcor2l1	REST corepressor 2 [Source:RGD Symbol;Acc:1359467]
ENSRNOG00000052814	791.241	-0.0161581	0.0765771	-0.211005	0.832883	0.889726	ENSRNOG00000052814	Ankrd27	ankyrin repeat domain 27 [Source:RGD Symbol;Acc:1307106]
ENSRNOG00000024140	720.959	0.15408	0.0667367	2.30878	0.0209559	0.0497063	ENSRNOG00000024140	Sft2d1	SFT2 domain containing 1 [Source:RGD Symbol;Acc:1359119]
ENSRNOG00000024620	21.254	0.841342	0.362186	2.32295	0.0201816	0.0481218	ENSRNOG00000024620	Mamdc2	MAM domain containing 2 [Source:RGD Symbol;Acc:1305129]
ENSRNOG00000068524	54.0186	-0.887868	0.219346	-4.0478	5.1701e-05	0.000278296	ENSRNOG00000068524	LOC108349831	40S ribosomal protein S29 pseudogene [Source:RGD Symbol;Acc:11452897]
ENSRNOG00000012415	2770.49	0.38528	0.0698604	5.51499	3.48795e-08	4.10535e-07	ENSRNOG00000012415	Mpc1	mitochondrial pyruvate carrier 1 [Source:RGD Symbol;Acc:620902]
ENSRNOG00000022393	76.5976	-0.0133728	0.18257	-0.0732478	0.941609	0.961879	ENSRNOG00000022393	Faap24	FA core complex associated protein 24 [Source:RGD Symbol;Acc:1564719]
ENSRNOG00000013309	175.977	0.121452	0.15531	0.781994	0.434218	0.56046	ENSRNOG00000013309	Pik3ap1	phosphoinositide-3-kinase adaptor protein 1 [Source:RGD Symbol;Acc:1307744]
ENSRNOG00000021129	932.102	-0.186426	0.0875017	-2.13054	0.0331273	0.072576	ENSRNOG00000021129	Garre1	granule associated Rac and RHOG effector 1 [Source:RGD Symbol;Acc:1308428]
ENSRNOG00000013053	35.5069	-0.350348	0.286589	-1.22248	0.221528	0.336096	ENSRNOG00000013053	Trpm6	transient receptor potential cation channel, subfamily M, member 6 [Source:RGD Symbol;Acc:1309942]
ENSRNOG00000065068	417.191	0.182609	0.0994558	1.83608	0.0663459	0.128065	ENSRNOG00000065068	LOC100912659	zinc finger protein 709-like [Source:RGD Symbol;Acc:6485855]
ENSRNOG00000016930	1392.12	-0.00820384	0.0731292	-0.112183	0.910678	0.940693	ENSRNOG00000016930	Ube2s	ubiquitin-conjugating enzyme E2S [Source:RGD Symbol;Acc:1564746]
ENSRNOG00000029336	6007.59	-0.0335246	0.0589737	-0.568466	0.569718	0.682456	ENSRNOG00000029336	Zfp180	zinc finger protein 180 [Source:RGD Symbol;Acc:631380]
ENSRNOG00000038600	76.5291	-0.170726	0.205792	-0.829605	0.406762	0.533358	ENSRNOG00000038600	Dnaaf3	dynein, axonemal, assembly factor 3 [Source:RGD Symbol;Acc:2323487]
ENSRNOG00000018250	438.434	0.0647486	0.140163	0.461952	0.644115	0.745906	ENSRNOG00000018250	Tnni3	troponin I3, cardiac type [Source:RGD Symbol;Acc:62052]
ENSRNOG00000029022	168.293	0.0555622	0.129651	0.428552	0.668249	0.765909	ENSRNOG00000029022	Zfp112	zinc finger protein 112 [Source:RGD Symbol;Acc:1305757]
ENSRNOG00000021184	2305.97	-0.324154	0.0958459	-3.38203	0.000719523	0.00280601	ENSRNOG00000021184	Mark2	microtubule affinity regulating kinase 2 [Source:RGD Symbol;Acc:708483]
ENSRNOG00000065539	19.8209	0.116634	0.383437	0.30418	0.760991	0.83605	ENSRNOG00000065539	Mob1a-ps1	MOB kinase activator 1A, pseudogene 1 [Source:RGD Symbol;Acc:1590598]
ENSRNOG00000051237	54.3239	0.103476	0.217581	0.475576	0.634376	0.737376	ENSRNOG00000051237	Marf1-ps1	meiosis regulator and mRNA stability factor 1, pseudogene 1 [Source:RGD Symbol;Acc:1597141]
ENSRNOG00000033173	33.1974	-0.145964	0.291967	-0.499931	0.617123	0.722151	ENSRNOG00000033173	Garin5b	golgi associated RAB2 interactor family member 5B [Source:RGD Symbol;Acc:1310169]
ENSRNOG00000068100	132.419	-0.195071	0.144584	-1.34918	0.177278	0.282246	ENSRNOG00000068100	Zfp235	zinc finger protein 235 [Source:RGD Symbol;Acc:150345771]
ENSRNOG00000020884	111.701	-0.0283266	0.175959	-0.160985	0.872106	0.915236	ENSRNOG00000020884	Cd6	Cd6 molecule [Source:RGD Symbol;Acc:2312]
ENSRNOG00000024376	341.787	-0.199131	0.0926204	-2.14997	0.0315578	0.06972	ENSRNOG00000024376	Zfp111	zinc finger protein 111 [Source:RGD Symbol;Acc:620595]
ENSRNOG00000066415	80.5679	-0.134096	0.181	-0.740858	0.458779	0.584143	ENSRNOG00000066415
ENSRNOG00000063144	137.411	-0.144949	0.129868	-1.11613	0.264368	0.386709	ENSRNOG00000063144	Znf235-ps1	zinc finger protein 235, pseudogene 1 [Source:RGD Symbol;Acc:7498933]
ENSRNOG00000020020	1376.18	-0.203689	0.0618577	-3.29287	0.000991707	0.00370323	ENSRNOG00000020020	Wbp1l	WW domain binding protein 1-like [Source:RGD Symbol;Acc:1305793]
ENSRNOG00000052945	974.869	-0.276759	0.0716569	-3.86228	0.000112335	0.000551817	ENSRNOG00000052945	Pepd	peptidase D [Source:RGD Symbol;Acc:1594571]
ENSRNOG00000046439	792.435	-0.0957815	0.0724731	-1.32161	0.186297	0.293442	ENSRNOG00000046439	Vps37c	VPS37C subunit of ESCRT-I [Source:RGD Symbol;Acc:11384366]
ENSRNOG00000010967	1085.18	0.150305	0.106683	1.40888	0.15887	0.258945	ENSRNOG00000010967	Cdc37l1	cell division cycle 37-like 1 [Source:RGD Symbol;Acc:1309295]
ENSRNOG00000062629	131.572	0.123416	0.168729	0.731444	0.464508	0.589779	ENSRNOG00000062629	Zfp420-ps2	zinc finger protein 420, pseudogene 2 [Source:RGD Symbol;Acc:7577345]
ENSRNOG00000016218	3159.27	-0.104409	0.0647704	-1.61199	0.106964	0.18951	ENSRNOG00000016218	Gtf3c1	general transcription factor IIIC subunit 1 [Source:RGD Symbol;Acc:621048]
ENSRNOG00000033146	366.039	-0.131344	0.106677	-1.23123	0.218238	0.331845	ENSRNOG00000033146	LOC100360843	ribosomal protein S19-like [Source:RGD Symbol;Acc:2321315]
ENSRNOG00000017804	65.5094	-0.260703	0.211381	-1.23333	0.217453	0.330986	ENSRNOG00000017804	Septin1	septin 1 [Source:RGD Symbol;Acc:1307216]
ENSRNOG00000017299	1300.99	-0.232025	0.0724619	-3.20202	0.00136465	0.00488915	ENSRNOG00000017299	Phrf1	PHD and ring finger domains 1 [Source:RGD Symbol;Acc:708360]
ENSRNOG00000016274	241.614	-0.398788	0.121934	-3.27053	0.00107345	0.00397867	ENSRNOG00000016274	Zfp580	zinc finger protein 580 [Source:RGD Symbol;Acc:1306892]
ENSRNOG00000016023	1242.39	-0.449818	0.0985184	-4.56583	4.9753e-06	3.47689e-05	ENSRNOG00000016023	Kank1	KN motif and ankyrin repeat domains 1 [Source:RGD Symbol;Acc:1307714]
ENSRNOG00000016829	188.461	-0.0687564	0.134997	-0.509318	0.610529	0.716805	ENSRNOG00000016829	Isoc2a	isochorismatase domain containing 2b [Source:RGD Symbol;Acc:1309062]
ENSRNOG00000013165	424.441	0.129088	0.0895959	1.44078	0.149647	0.246628	ENSRNOG00000013165	Bet1l	Bet1 golgi vesicular membrane trafficking protein-like [Source:RGD Symbol;Acc:71051]
ENSRNOG00000016877	3906.86	-0.0143979	0.0766419	-0.18786	0.850986	0.901271	ENSRNOG00000016877	Shisa7	shisa family member 7 [Source:RGD Symbol;Acc:1583944]
ENSRNOG00000015442	1095.11	0.133024	0.0708735	1.87691	0.0605298	0.118881	ENSRNOG00000015442	Sfxn3	sideroflexin 3 [Source:RGD Symbol;Acc:620716]
ENSRNOG00000017810	273.658	0.0491924	0.100461	0.489665	0.624371	0.728977	ENSRNOG00000017810	Uros	uroporphyrinogen III synthase [Source:RGD Symbol;Acc:1310396]
ENSRNOG00000015491	528.857	-0.00188302	0.0843164	-0.0223328	0.982183	0.98933	ENSRNOG00000015491	Rcl1	RNA terminal phosphate cyclase-like 1 [Source:RGD Symbol;Acc:1305320]
ENSRNOG00000050348	333.843	-0.12937	0.119931	-1.0787	0.280721	0.404565	ENSRNOG00000050348	Isoc2a	isochorismatase domain containing 2A [Source:RGD Symbol;Acc:1592677]
ENSRNOG00000017127	4605.62	-0.267742	0.0876682	-3.05404	0.00225785	0.00756905	ENSRNOG00000017127	Rpl28	ribosomal protein L28 [Source:RGD Symbol;Acc:621193]
ENSRNOG00000017837	449.47	-0.0441872	0.0822949	-0.536938	0.591311	0.700223	ENSRNOG00000017837	Znf48	zinc finger protein 48 [Source:RGD Symbol;Acc:9115869]
ENSRNOG00000053828	2848.92	-0.192806	0.0906633	-2.12662	0.0334518	0.0731691	ENSRNOG00000053828	Ppp1r12c	protein phosphatase 1, regulatory subunit 12C [Source:RGD Symbol;Acc:1584883]
ENSRNOG00000052506	789.088	-0.323137	0.0742448	-4.35232	1.34705e-05	8.50683e-05	ENSRNOG00000052506	Ak3	adenylate kinase 3 [Source:RGD Symbol;Acc:619885]
ENSRNOG00000025061	278.014	-0.135462	0.094952	-1.42663	0.153686	0.251896	ENSRNOG00000025061	Spindoc	spindlin interactor and repressor of chromatin binding [Source:RGD Symbol;Acc:1308106]
ENSRNOG00000013813	137.718	-0.580655	0.163828	-3.54429	0.000393667	0.00165389	ENSRNOG00000013813	Ubtd1	ubiquitin domain containing 1 [Source:RGD Symbol;Acc:1308172]
ENSRNOG00000027942	38.3243	0.47843	0.248574	1.92469	0.0542676	0.108593	ENSRNOG00000027942	Eps8l1	EPS8-like 1 [Source:RGD Symbol;Acc:1311146]
ENSRNOG00000012156	613.158	-0.0184962	0.079707	-0.232053	0.816497	0.877679	ENSRNOG00000012156	Ostf1	osteoclast stimulating factor 1 [Source:RGD Symbol;Acc:628849]
ENSRNOG00000020723	799.458	0.460044	0.092168	4.99136	5.99559e-07	5.33782e-06	ENSRNOG00000020723	Pten	phosphatase and tensin homolog [Source:RGD Symbol;Acc:61995]
ENSRNOG00000020857	1036.9	-0.114399	0.0840901	-1.36044	0.173692	0.277714	ENSRNOG00000020857	Ppfia1	PTPRF interacting protein alpha 1 [Source:RGD Symbol;Acc:1309009]
ENSRNOG00000012665	169.907	0.0579265	0.121365	0.477291	0.633155	0.736266	ENSRNOG00000012665	Nmrk1	nicotinamide riboside kinase 1 [Source:RGD Symbol;Acc:1564687]
ENSRNOG00000018708	3140.87	-0.110634	0.0533492	-2.07377	0.0381006	0.0813494	ENSRNOG00000018708	Ppp1ca	protein phosphatase 1 catalytic subunit alpha [Source:RGD Symbol;Acc:3375]
ENSRNOG00000038622	253.811	-0.294895	0.127974	-2.30434	0.0212037	0.0501849	ENSRNOG00000038622	Nat14	N-acetyltransferase 14 [Source:RGD Symbol;Acc:1565991]
ENSRNOG00000018561	593.554	-0.183544	0.0773946	-2.37153	0.0177145	0.0431195	ENSRNOG00000018561	Pprc1	PPARG related coactivator 1 [Source:RGD Symbol;Acc:1309688]
ENSRNOG00000067958	27.3124	-0.676476	0.292052	-2.31628	0.0205429	0.0488973	ENSRNOG00000067958	Nat14	N-acetyltransferase 14 [Source:RGD Symbol;Acc:1565991]
ENSRNOG00000015156	32.4677	0.198066	0.308491	0.642047	0.520842	0.64105	ENSRNOG00000015156	Gal	galanin and GMAP prepropeptide [Source:RGD Symbol;Acc:61954]
ENSRNOG00000016302	1527.61	0.0180519	0.0738201	0.244539	0.806814	0.869955	ENSRNOG00000016302	Cnnm1	cyclin and CBS domain divalent metal cation transport mediator 1 [Source:RGD Symbol;Acc:1308728]
ENSRNOG00000027733	18.2046	-0.254547	0.317752	-0.801089	0.42308	0.549549	ENSRNOG00000027733	Lair1	leukocyte-associated immunoglobulin-like receptor 1 [Source:RGD Symbol;Acc:1560048]
ENSRNOG00000017872	179.15	0.0537366	0.201579	0.266579	0.789793	0.857297	ENSRNOG00000017872	Aldh3b3	aldehyde dehydrogenase family 3 member B3 [Source:RGD Symbol;Acc:41285163]
ENSRNOG00000056753	445.524	0.762882	0.0996983	7.65191	1.98021e-14	8.88893e-13	ENSRNOG00000056753	Hectd2	HECT domain E3 ubiquitin protein ligase 2 [Source:RGD Symbol;Acc:1305536]
ENSRNOG00000069605	177.26	-0.294265	0.128246	-2.29454	0.0217597	0.0512306	ENSRNOG00000069605	Leng9	leukocyte receptor cluster member 9 [Source:RGD Symbol;Acc:6488215]
ENSRNOG00000018729	480.469	-0.089427	0.0959365	-0.932148	0.35126	0.478854	ENSRNOG00000018729	Rad9a	RAD9 checkpoint clamp component A [Source:RGD Symbol;Acc:2319938]
ENSRNOG00000018642	1651.09	-0.559314	0.180953	-3.09094	0.00199525	0.00680003	ENSRNOG00000018642	Leng8	leukocyte receptor cluster member 8 [Source:RGD Symbol;Acc:1306180]
ENSRNOG00000018752	283.923	0.235608	0.150955	1.56078	0.118575	0.205503	ENSRNOG00000018752	Clcf1	cardiotrophin-like cytokine factor 1 [Source:RGD Symbol;Acc:1303171]
ENSRNOG00000013256	1136.7	-0.191792	0.0648925	-2.95554	0.00312122	0.00996071	ENSRNOG00000013256	Ric8a	RIC8 guanine nucleotide exchange factor A [Source:RGD Symbol;Acc:727957]
ENSRNOG00000018718	433.581	0.0302104	0.0923322	0.327193	0.743522	0.823516	ENSRNOG00000018718	Rpp30	ribonuclease P/MRP subunit p30 [Source:RGD Symbol;Acc:1595116]
ENSRNOG00000061147	398.624	-0.158805	0.109494	-1.45035	0.146962	0.243008	ENSRNOG00000061147	Entrep1	endosomal transmembrane epsin interactor 1 [Source:RGD Symbol;Acc:1307524]
ENSRNOG00000018765	187.089	-0.158499	0.114209	-1.38779	0.1652	0.267165	ENSRNOG00000018765	Pold4	DNA polymerase delta 4, accessory subunit [Source:RGD Symbol;Acc:1308519]
ENSRNOG00000013828	1229.38	-0.0424762	0.0602006	-0.705579	0.48045	0.604882	ENSRNOG00000013828	Sirt3	sirtuin 3 [Source:RGD Symbol;Acc:1308374]
ENSRNOG00000013967	276.564	-0.355544	0.126991	-2.79975	0.00511423	0.0151772	ENSRNOG00000013967	Blnk	B-cell linker [Source:RGD Symbol;Acc:1561933]
ENSRNOG00000066970	62.135	0.16853	0.216057	0.780022	0.435378	0.561763	ENSRNOG00000066970
ENSRNOG00000028628	521.091	-0.501064	0.0902876	-5.54965	2.8625e-08	3.4396e-07	ENSRNOG00000028628	Znf865	zinc finger protein 865 [Source:RGD Symbol;Acc:6494165]
ENSRNOG00000018066	500.516	0.15167	0.0841882	1.80157	0.0716138	0.136628	ENSRNOG00000018066	Bccip	BRCA2 and CDKN1A interacting protein [Source:RGD Symbol;Acc:1307362]
ENSRNOG00000048166	88.7657	0.0350858	0.165207	0.212375	0.831814	0.888965	ENSRNOG00000048166	Arhgap19	Rho GTPase activating protein 19 [Source:RGD Symbol;Acc:1593044]
ENSRNOG00000014891	101.266	-0.305916	0.205	-1.49227	0.135629	0.228067	ENSRNOG00000014891	Ptar1	protein prenyltransferase alpha subunit repeat containing 1 [Source:RGD Symbol;Acc:708369]
ENSRNOG00000026048	2071.33	-0.123462	0.0546778	-2.25798	0.0239467	0.0555356	ENSRNOG00000026048	Gbf1	golgi brefeldin A resistant guanine nucleotide exchange factor 1 [Source:RGD Symbol;Acc:1307160]
ENSRNOG00000016635	539.704	-0.222918	0.0810515	-2.75032	0.00595363	0.0172246	ENSRNOG00000016635	Katnip	katanin interacting protein [Source:RGD Symbol;Acc:1595846]
ENSRNOG00000047349	41.2792	-0.153252	0.245967	-0.62306	0.533245	0.652875	ENSRNOG00000047349	Ms4a6b	membrane-spanning 4-domains, subfamily A, member 6B [Source:RGD Symbol;Acc:1311761]
ENSRNOG00000015932	210.891	0.00238676	0.109853	0.0217268	0.982666	0.989484	ENSRNOG00000015932	Plgrkt	plasminogen receptor with a C-terminal lysine [Source:RGD Symbol;Acc:1306839]
ENSRNOG00000025781	90.595	-0.419914	0.189454	-2.21644	0.0266614	0.0606876	ENSRNOG00000025781	Sec31b	SEC31 homolog B, COPII coat complex component [Source:RGD Symbol;Acc:1598329]
ENSRNOG00000018119	1069.73	-0.0291178	0.0722606	-0.402956	0.686981	0.780615	ENSRNOG00000018119	Dhx32	DEAH-box helicase 32 (putative) [Source:RGD Symbol;Acc:1311740]
ENSRNOG00000016112	32.9224	0.886685	0.30984	2.86175	0.00421312	0.0128526	ENSRNOG00000016112	Cd274	CD274 molecule [Source:RGD Symbol;Acc:1566211]
ENSRNOG00000011287	915.482	0.156531	0.0651231	2.40361	0.0162341	0.0401235	ENSRNOG00000011287	Minpp1	multiple inositol-polyphosphate phosphatase 1 [Source:RGD Symbol;Acc:3089]
ENSRNOG00000014109	1505.16	-0.0545294	0.0536752	-1.01591	0.309671	0.436837	ENSRNOG00000014109	Psmd13	proteasome 26S subunit, non-ATPase 13 [Source:RGD Symbol;Acc:1305236]
ENSRNOG00000016456	912.319	-0.0373079	0.0807511	-0.462011	0.644073	0.745906	ENSRNOG00000016456	Il33	interleukin 33 [Source:RGD Symbol;Acc:1311155]
ENSRNOG00000042826	63.4393	-0.0249569	0.198981	-0.125423	0.900188	0.933992	ENSRNOG00000042826	Zfp52	zinc finger protein 52 [Source:RGD Symbol;Acc:1359149]
ENSRNOG00000063577	304.41	0.183988	0.115293	1.59582	0.110528	0.194465	ENSRNOG00000063577	LOC102550851	zinc finger protein 420-like [Source:RGD Symbol;Acc:7563768]
ENSRNOG00000018327	40.3178	0.100493	0.235031	0.427574	0.668961	0.766314	ENSRNOG00000018327	Fank1	fibronectin type III and ankyrin repeat domains 1 [Source:RGD Symbol;Acc:1304756]
ENSRNOG00000043341	115.917	0.193955	0.146497	1.32396	0.185518	0.292523	ENSRNOG00000043341	Zfp51l1	zinc finger protein 51 like 1 [Source:RGD Symbol;Acc:1560046]
ENSRNOG00000042547	219.535	-0.421646	0.426701	-0.988153	0.323078	0.451146	ENSRNOG00000042547	AABR07001902.1
ENSRNOG00000017349	1941.15	-0.17973	0.0655573	-2.74158	0.00611449	0.0176209	ENSRNOG00000017349	Tbc1d10b	TBC1 domain family, member 10b [Source:RGD Symbol;Acc:1309191]
ENSRNOG00000020567	798.039	-0.0564505	0.0739732	-0.763122	0.445391	0.571823	ENSRNOG00000020567	Fibp	FGF1 intracellular binding protein [Source:RGD Symbol;Acc:628715]
ENSRNOG00000024602	260.158	-0.4495	0.147362	-3.05032	0.00228599	0.00764622	ENSRNOG00000024602	Plekha7	pleckstrin homology domain containing A7 [Source:RGD Symbol;Acc:1598216]
ENSRNOG00000017751	4984.83	0.346743	0.0638948	5.42678	5.738e-08	6.49293e-07	ENSRNOG00000017751	Arl6ip1	ADP-ribosylation factor like GTPase 6 interacting protein 1 [Source:RGD Symbol;Acc:735205]
ENSRNOG00000036585	306.897	-0.0427386	0.143138	-0.298584	0.765258	0.839237	ENSRNOG00000036585	Cfap43	cilia and flagella associated protein 43 [Source:RGD Symbol;Acc:1560545]
ENSRNOG00000020455	55.3932	0.314651	0.228931	1.37444	0.169306	0.272185	ENSRNOG00000020455	Cst6	cystatin E/M [Source:RGD Symbol;Acc:628799]
ENSRNOG00000018384	141.077	-0.0945335	0.153252	-0.616849	0.537334	0.656322	ENSRNOG00000018384	Adam12	ADAM metallopeptidase domain 12 [Source:RGD Symbol;Acc:1583652]
ENSRNOG00000017645	69.1384	0.292038	0.273402	1.06816	0.285447	0.409841	ENSRNOG00000017645	Myl11	myosin light chain 11 [Source:RGD Symbol;Acc:3141]
ENSRNOG00000019721	2060.12	-0.0833796	0.0872434	-0.955713	0.339217	0.467123	ENSRNOG00000019721	Ypel3	yippee-like 3 [Source:RGD Symbol;Acc:1564579]
ENSRNOG00000046602	131.471	0.195464	0.325448	0.600598	0.548108	0.665133	ENSRNOG00000046602	Muc2	mucin 2, oligomeric mucus/gel-forming [Source:RGD Symbol;Acc:3123]
ENSRNOG00000020460	1533.44	0.0736507	0.054645	1.3478	0.177722	0.282827	ENSRNOG00000020460	Banf1	BAF nuclear assembly factor 1 [Source:RGD Symbol;Acc:620662]
ENSRNOG00000027491	1144.89	0.211668	0.0791521	2.6742	0.00749087	0.0209209	ENSRNOG00000027491	Vldlr	very low density lipoprotein receptor [Source:RGD Symbol;Acc:3963]
ENSRNOG00000020047	829.372	-0.214867	0.0865534	-2.48248	0.0130471	0.0335274	ENSRNOG00000020047	Tut1	terminal uridylyl transferase 1, U6 snRNA-specific [Source:RGD Symbol;Acc:1561043]
ENSRNOG00000053450	628.05	0.305056	0.0945229	3.22732	0.00124955	0.00452695	ENSRNOG00000053450	Myadm	myeloid-associated differentiation marker [Source:RGD Symbol;Acc:727835]
ENSRNOG00000020813	648.399	-0.708197	0.104779	-6.75895	1.38995e-11	3.45707e-10	ENSRNOG00000020813	Ltbp3	latent transforming growth factor beta binding protein 3 [Source:RGD Symbol;Acc:62057]
ENSRNOG00000020463	644.397	0.110066	0.0724506	1.51919	0.128715	0.218715	ENSRNOG00000020463	Eif1ad	eukaryotic translation initiation factor 1A domain containing [Source:RGD Symbol;Acc:1304686]
ENSRNOG00000017822	6070.92	0.230491	0.064345	3.58212	0.000340819	0.00146018	ENSRNOG00000017822	Oga	O-GlcNAcase [Source:RGD Symbol;Acc:621077]
ENSRNOG00000056257	2644.91	-0.049429	0.0607354	-0.813841	0.415736	0.54194	ENSRNOG00000056257	Cacng7	calcium voltage-gated channel auxiliary subunit gamma 7 [Source:RGD Symbol;Acc:628807]
ENSRNOG00000058842	21974.8	-0.817429	0.0950881	-8.59654	8.21534e-18	6.6023e-16	ENSRNOG00000058842	Sptbn2	spectrin, beta, non-erythrocytic 2 [Source:RGD Symbol;Acc:3751]
ENSRNOG00000023668	1349.19	-0.300979	0.0887131	-3.39273	0.000692009	0.00271002	ENSRNOG00000023668	Scyl1	SCY1 like pseudokinase 1 [Source:RGD Symbol;Acc:1307330]
ENSRNOG00000051570	52.5697	0.490647	0.289975	1.69203	0.0906402	0.16513	ENSRNOG00000051570	Znf845l-ps1	zinc finger protein 845 like, pseudogene 1 [Source:RGD Symbol;Acc:7732425]
ENSRNOG00000016117	269.794	-0.342533	0.127893	-2.67828	0.00740007	0.0207108	ENSRNOG00000016117	Myof	myoferlin [Source:RGD Symbol;Acc:1564216]
ENSRNOG00000050994	2264.33	-0.0384443	0.0426731	-0.900904	0.367639	0.4954	ENSRNOG00000050994	Cttn	cortactin [Source:RGD Symbol;Acc:619839]
ENSRNOG00000055229	1745.01	0.620777	0.079618	7.79695	6.34197e-15	3.09803e-13	ENSRNOG00000055229	Lnpep	leucyl and cystinyl aminopeptidase [Source:RGD Symbol;Acc:621752]
ENSRNOG00000020475	1135.34	-0.288042	0.0622567	-4.62669	3.71549e-06	2.68305e-05	ENSRNOG00000020475	Sart1	spliceosome associated factor 1, recruiter of U4/U6.U5 tri-snRNP [Source:RGD Symbol;Acc:61930]
ENSRNOG00000042620	176.567	-0.302516	0.123634	-2.44687	0.0144101	0.0363793	ENSRNOG00000042620	Marveld1	MARVEL domain containing 1 [Source:RGD Symbol;Acc:1309811]
ENSRNOG00000014650	762.771	-0.161355	0.0739435	-2.18214	0.0290992	0.0653216	ENSRNOG00000014650	Sema4g	semaphorin 4G [Source:RGD Symbol;Acc:1310436]
ENSRNOG00000014890	709.829	-0.00962962	0.0691976	-0.139161	0.889323	0.926706	ENSRNOG00000014890	Mrpl43	mitochondrial ribosomal protein L43 [Source:RGD Symbol;Acc:1307593]
ENSRNOG00000014041	256.425	-0.339499	0.111732	-3.03851	0.00237753	0.00789411	ENSRNOG00000014041	Cep78	centrosomal protein 78 [Source:RGD Symbol;Acc:620464]
ENSRNOG00000015071	26.7398	0.850136	0.338181	2.51385	0.011942	0.0310992	ENSRNOG00000015071	Zim1	zinc finger, imprinted 1 [Source:RGD Symbol;Acc:1310930]
ENSRNOG00000021150	380.356	-0.601646	0.091726	-6.55917	5.41093e-11	1.16893e-09	ENSRNOG00000021150	Plcb3	phospholipase C beta 3 [Source:RGD Symbol;Acc:61993]
ENSRNOG00000018944	475.099	-0.0370875	0.137616	-0.2695	0.787545	0.855876	ENSRNOG00000018944	Pank1	pantothenate kinase 1 [Source:RGD Symbol;Acc:1304677]
ENSRNOG00000021005	555.561	0.0582851	0.0707713	0.82357	0.410184	0.53648	ENSRNOG00000021005	Mrpl16	mitochondrial ribosomal protein L16 [Source:RGD Symbol;Acc:735195]
ENSRNOG00000014935	959.21	0.0128714	0.084752	0.151871	0.879289	0.920285	ENSRNOG00000014935	Twnk	twinkle mtDNA helicase [Source:RGD Symbol;Acc:1307884]
ENSRNOG00000058422	50.4523	0.00462937	0.25723	0.017997	0.985641	0.990764	ENSRNOG00000058422	Pirb	paired Ig-like receptor B [Source:RGD Symbol;Acc:1589827]
ENSRNOG00000016833	926.918	-0.19951	0.0707714	-2.81908	0.00481608	0.0144299	ENSRNOG00000016833	Ide	insulin degrading enzyme [Source:RGD Symbol;Acc:2861]
ENSRNOG00000054371	4378.44	-0.0294005	0.0661341	-0.444558	0.656639	0.757014	ENSRNOG00000054371	Prkcg	protein kinase C, gamma [Source:RGD Symbol;Acc:3397]
ENSRNOG00000056038	758.749	-0.439347	0.121931	-3.60325	0.00031426	0.00136201	ENSRNOG00000056038	Ehbp1l1	EH domain binding protein 1-like 1 [Source:RGD Symbol;Acc:1563823]
ENSRNOG00000058909	4988.11	-0.148862	0.0657271	-2.26485	0.0235221	0.054691	ENSRNOG00000058909	Rps9	ribosomal protein S9 [Source:RGD Symbol;Acc:619889]
ENSRNOG00000059572	1041.5	-0.177946	0.0847026	-2.10083	0.0356561	0.0772111	ENSRNOG00000059572	Tsen34	tRNA splicing endonuclease subunit 34 [Source:RGD Symbol;Acc:1359564]
ENSRNOG00000012110	40.5384	-0.501458	0.336339	-1.49093	0.13598	0.228514	ENSRNOG00000012110	Col17a1	collagen type XVII alpha 1 chain [Source:RGD Symbol;Acc:1311130]
ENSRNOG00000052600	2221.06	0.0963869	0.0622097	1.54939	0.121289	0.209042	ENSRNOG00000052600	Mboat7	membrane bound O-acyltransferase domain containing 7 [Source:RGD Symbol;Acc:1306945]
ENSRNOG00000061893	151.77	-0.176511	0.135273	-1.30485	0.191942	0.300876	ENSRNOG00000061893	Leng1	leukocyte receptor cluster member 1 [Source:RGD Symbol;Acc:1307933]
ENSRNOG00000053728	39.4815	0.494445	0.286448	1.72613	0.0843247	0.155598	ENSRNOG00000053728	Prkg1	protein kinase cGMP-dependent 1 [Source:RGD Symbol;Acc:1587390]
ENSRNOG00000053234	715.366	-0.206002	0.0896345	-2.29824	0.0215481	0.0508317	ENSRNOG00000053234	Cnot3	CCR4-NOT transcription complex, subunit 3 [Source:RGD Symbol;Acc:1304771]
ENSRNOG00000025523	529.267	-0.0588	0.107511	-0.546919	0.584434	0.694611	ENSRNOG00000025523	Armh3	armadillo-like helical domain containing 3 [Source:RGD Symbol;Acc:9299787]
ENSRNOG00000061039	614.151	-0.161764	0.0729568	-2.21726	0.0266055	0.0606341	ENSRNOG00000061039	Prpf31	pre-mRNA processing factor 31 [Source:RGD Symbol;Acc:1305832]
ENSRNOG00000020975	1416.98	0.0791112	0.0593469	1.33303	0.182522	0.288866	ENSRNOG00000020975	Mrpl49	mitochondrial ribosomal protein L49 [Source:RGD Symbol;Acc:1309920]
ENSRNOG00000056098	335.139	-0.0760101	0.0924893	-0.821825	0.411176	0.537449	ENSRNOG00000056098	Tfpt	TCF3 fusion partner [Source:RGD Symbol;Acc:620839]
ENSRNOG00000060293	137.96	-0.0618473	0.17294	-0.357623	0.720625	0.807313	ENSRNOG00000060293	Ndufa3	NADH:ubiquinone oxidoreductase subunit A3 [Source:RGD Symbol;Acc:1588687]
ENSRNOG00000014816	766.361	0.290403	0.0810857	3.58143	0.000341718	0.00146277	ENSRNOG00000014816	Slc1a1	solute carrier family 1 member 1 [Source:RGD Symbol;Acc:3696]
ENSRNOG00000017406	3623.48	0.389507	0.0754381	5.16327	2.42673e-07	2.3709e-06	ENSRNOG00000017406	Atrnl1	attractin like 1 [Source:RGD Symbol;Acc:1563485]
ENSRNOG00000055716	26.5552	0.280617	0.305021	0.91999	0.357578	0.485518	ENSRNOG00000055716	Oscar	osteoclast associated Ig-like receptor [Source:RGD Symbol;Acc:1559897]
ENSRNOG00000063395	125.959	0.536697	0.505215	1.06231	0.288093	0.412927	ENSRNOG00000063395
ENSRNOG00000022273	1018.55	0.432293	0.0849491	5.08885	3.60237e-07	3.38455e-06	ENSRNOG00000022273	Rfk	riboflavin kinase [Source:RGD Symbol;Acc:1549748]
ENSRNOG00000057848	654.874	-0.132465	0.106265	-1.24655	0.212561	0.325316	ENSRNOG00000057848	Cacng8	calcium voltage-gated channel auxiliary subunit gamma 8 [Source:RGD Symbol;Acc:628808]
ENSRNOG00000034078	3231.4	0.0835233	0.0623332	1.33995	0.180262	0.286107	ENSRNOG00000034078	Mxi1	MAX interactor 1, dimerization protein [Source:RGD Symbol;Acc:3128]
ENSRNOG00000013552	731.133	-0.501471	0.113432	-4.42092	9.82831e-06	6.37923e-05	ENSRNOG00000013552	Scd	stearoyl-CoA desaturase [Source:RGD Symbol;Acc:621176]
ENSRNOG00000062686	143.195	-0.0262261	0.170485	-0.153832	0.877742	0.919252	ENSRNOG00000062686	Gcnt1	glucosaminyl (N-acetyl) transferase 1 [Source:RGD Symbol;Acc:621370]
ENSRNOG00000017136	148.576	0.106763	0.143962	0.741605	0.458327	0.58375	ENSRNOG00000017136	Syt17	synaptotagmin 17 [Source:RGD Symbol;Acc:708576]
ENSRNOG00000017321	200.983	0.105748	0.117613	0.899118	0.36859	0.496234	ENSRNOG00000017321	Trub1	TruB pseudouridine synthase family member 1 [Source:RGD Symbol;Acc:1308502]
ENSRNOG00000055093	394.321	0.530239	0.108588	4.88303	1.04471e-06	8.76334e-06	ENSRNOG00000055093	Cep43	centrosomal protein 43 [Source:RGD Symbol;Acc:1583370]
ENSRNOG00000012258	255.193	-0.429593	0.139101	-3.08834	0.00201276	0.00684879	ENSRNOG00000012258	Rras2	RAS related 2 [Source:RGD Symbol;Acc:1310793]
ENSRNOG00000067119	84.6813	0.797223	0.215813	3.69404	0.000220718	0.0010013	ENSRNOG00000067119	Smim17	small integral membrane protein 17 [Source:RGD Symbol;Acc:1559613]
ENSRNOG00000020950	1218.57	-0.0988047	0.0757751	-1.30392	0.192261	0.301249	ENSRNOG00000020950	Syvn1	synoviolin 1 [Source:RGD Symbol;Acc:1310488]
ENSRNOG00000013413	161.302	-0.444212	0.173144	-2.56557	0.0103007	0.0273733	ENSRNOG00000013413	Rorb	RAR-related orphan receptor B [Source:RGD Symbol;Acc:1306778]
ENSRNOG00000070422	1340.72	0.437254	0.0726221	6.02096	1.73391e-09	2.76022e-08	ENSRNOG00000070422	Cstf2t	cleavage stimulation factor subunit 2, tau variant [Source:RGD Symbol;Acc:1310026]
ENSRNOG00000015124	3319.93	-0.301014	0.0838294	-3.59079	0.000329673	0.00141771	ENSRNOG00000015124	Gpam	glycerol-3-phosphate acyltransferase, mitochondrial [Source:RGD Symbol;Acc:61847]
ENSRNOG00000020562	29.6327	-0.846589	0.275468	-3.07328	0.00211722	0.00716509	ENSRNOG00000020562	Slc22a18	solute carrier family 22, member 18 [Source:RGD Symbol;Acc:1303323]
ENSRNOG00000030210	53.9003	-0.48089	0.257394	-1.8683	0.0617198	0.120821	ENSRNOG00000030210	Fndc1	fibronectin type III domain containing 1 [Source:RGD Symbol;Acc:1310640]
ENSRNOG00000018494	1609.76	-0.329894	0.0792592	-4.16222	3.15169e-05	0.000180021	ENSRNOG00000018494	Ppp1r3c	protein phosphatase 1, regulatory subunit 3C [Source:RGD Symbol;Acc:1309132]
ENSRNOG00000024239	698.089	-0.296412	0.0925622	-3.2023	0.00136336	0.004886	ENSRNOG00000024239	Fam89b	family with sequence similarity 89, member B [Source:RGD Symbol;Acc:1311544]
ENSRNOG00000021007	758.461	-0.339333	0.0995213	-3.40965	0.000650471	0.00256685	ENSRNOG00000021007	Snx15	sorting nexin 15 [Source:RGD Symbol;Acc:1305803]
ENSRNOG00000012736	483.714	-0.349069	0.121779	-2.86641	0.00415153	0.0126958	ENSRNOG00000012736	Znrd2	zinc ribbon domain containing 2 [Source:RGD Symbol;Acc:1593467]
ENSRNOG00000015137	67.6067	-0.186036	0.189446	-0.982003	0.326099	0.454162	ENSRNOG00000015137	Spata6l	spermatogenesis associated 6-like [Source:RGD Symbol;Acc:1310039]
ENSRNOG00000010230	1342.4	0.429495	0.0694421	6.18494	6.21255e-10	1.08487e-08	ENSRNOG00000010230	Dennd10	DENN domain containing 10 [Source:RGD Symbol;Acc:1308326]
ENSRNOG00000058003	1174.82	-0.0234852	0.0684654	-0.343023	0.731581	0.814717	ENSRNOG00000058003	Spon1	spondin 1 [Source:RGD Symbol;Acc:619918]
ENSRNOG00000024712	362.987	-0.226475	0.109946	-2.05988	0.0394104	0.0837275	ENSRNOG00000024712	Insc	INSC, spindle orientation adaptor protein [Source:RGD Symbol;Acc:1311379]
ENSRNOG00000019048	5422.27	0.376334	0.0629508	5.97822	2.25584e-09	3.4871e-08	ENSRNOG00000019048	Sod2	superoxide dismutase 2 [Source:RGD Symbol;Acc:3732]
ENSRNOG00000008890	239.08	0.431051	0.120241	3.5849	0.000337206	0.00144677	ENSRNOG00000008890	Slc18a2	solute carrier family 18 member A2 [Source:RGD Symbol;Acc:3694]
ENSRNOG00000019091	1419.98	0.389672	0.0666996	5.84219	5.152e-09	7.36957e-08	ENSRNOG00000019091	Wtap	WT1 associated protein [Source:RGD Symbol;Acc:1563824]
ENSRNOG00000019534	7703.05	-0.0646941	0.0503469	-1.28497	0.198803	0.309134	ENSRNOG00000019534	Ap2a2	adaptor related protein complex 2 subunit alpha 2 [Source:RGD Symbol;Acc:71015]
ENSRNOG00000032554	98.1513	-0.203157	0.18449	-1.10118	0.270817	0.393983	ENSRNOG00000032554	Scd4	stearoyl-coenzyme A desaturase 4 [Source:RGD Symbol;Acc:1563648]
ENSRNOG00000009460	2101.93	0.290302	0.0692916	4.18957	2.79481e-05	0.000161675	ENSRNOG00000009460	Pdzd8	PDZ domain containing 8 [Source:RGD Symbol;Acc:1308622]
ENSRNOG00000021010	1381.21	-0.234088	0.0940902	-2.48791	0.0128495	0.0330706	ENSRNOG00000021010	Arl2	ADP-ribosylation factor like GTPase 2 [Source:RGD Symbol;Acc:69326]
ENSRNOG00000019189	883.478	-0.314594	0.0807051	-3.89807	9.69608e-05	0.000483635	ENSRNOG00000019189	Acat2	acetyl-CoA acetyltransferase 2 [Source:RGD Symbol;Acc:1359366]
ENSRNOG00000018532	149.84	0.394344	0.157939	2.49681	0.0125315	0.0323784	ENSRNOG00000018532	Pcgf5	polycomb group ring finger 5 [Source:RGD Symbol;Acc:1583513]
ENSRNOG00000009812	1440.09	-0.161097	0.0791918	-2.03427	0.0419245	0.0882038	ENSRNOG00000009812	Sbf2	SET binding factor 2 [Source:RGD Symbol;Acc:1588657]
ENSRNOG00000010958	1561.3	0.294642	0.0674656	4.36729	1.25796e-05	8.00681e-05	ENSRNOG00000010958	Prdx3	peroxiredoxin 3 [Source:RGD Symbol;Acc:620040]
ENSRNOG00000013975	69.3681	-0.755839	0.206975	-3.65184	0.000260367	0.00115523	ENSRNOG00000013975	Acat2l1	acetyl-CoA acetyltransferase 2-like 1 [Source:RGD Symbol;Acc:1562948]
ENSRNOG00000062728	265.396	0.112073	0.100396	1.11631	0.264288	0.386656	ENSRNOG00000062728	Tctn3	tectonic family member 3 [Source:RGD Symbol;Acc:1305166]
ENSRNOG00000018704	2459.96	0.100358	0.0529144	1.89661	0.0578794	0.11475	ENSRNOG00000018704	Nolc1	nucleolar and coiled-body phosphoprotein 1 [Source:RGD Symbol;Acc:621578]
ENSRNOG00000062573	1673.86	-0.257359	0.0505924	-5.0869	3.63964e-07	3.41313e-06	ENSRNOG00000062573	Cd151	CD151 molecule (Raph blood group) [Source:RGD Symbol;Acc:621290]
ENSRNOG00000014160	2290.53	0.164226	0.0628873	2.61143	0.00901647	0.0244799	ENSRNOG00000014160	Tcp1	t-complex 1 [Source:RGD Symbol;Acc:3832]
ENSRNOG00000020892	1611.12	-0.0622022	0.0635102	-0.979406	0.327379	0.455446	ENSRNOG00000020892	Dpf2	double PHD fingers 2 [Source:RGD Symbol;Acc:1311699]
ENSRNOG00000014582	603.817	-0.0294993	0.0701964	-0.42024	0.67431	0.770375	ENSRNOG00000014582	Mrpl18	mitochondrial ribosomal protein L18 [Source:RGD Symbol;Acc:1306387]
ENSRNOG00000048562	576.448	-0.490041	0.114836	-4.2673	1.97855e-05	0.000119063	ENSRNOG00000048562	AC109542.1
ENSRNOG00000056817	26.0294	0.142572	0.330446	0.431452	0.666139	0.764194	ENSRNOG00000056817	Muc6	mucin 6, oligomeric mucus/gel-forming [Source:RGD Symbol;Acc:628826]
ENSRNOG00000023140	28.7328	-0.245005	0.279396	-0.87691	0.380536	0.50797	ENSRNOG00000023140	Pnldc1	PARN like ribonuclease domain containing exonuclease 1 [Source:RGD Symbol;Acc:1308678]
ENSRNOG00000051680	1300.18	0.425367	0.0639835	6.64807	2.96968e-11	6.85043e-10	ENSRNOG00000051680	Ccdc186	coiled-coil domain containing 186 [Source:RGD Symbol;Acc:1307158]
ENSRNOG00000029810	293.645	-0.304787	0.0934242	-3.2624	0.00110474	0.00407443	ENSRNOG00000029810	Tspan4	tetraspanin 4 [Source:RGD Symbol;Acc:1305810]
ENSRNOG00000061215	2274.76	-0.214351	0.0809285	-2.64865	0.00808133	0.0223084	ENSRNOG00000061215	Crym	crystallin, mu [Source:RGD Symbol;Acc:620943]
ENSRNOG00000020446	30.325	-0.368969	0.299278	-1.23286	0.217627	0.33117	ENSRNOG00000020446	LOC102555739	uncharacterized LOC102555739 [Source:RGD Symbol;Acc:7704573]
ENSRNOG00000019103	414.914	-0.130442	0.0903331	-1.44401	0.148735	0.245397	ENSRNOG00000019103	Cln3	CLN3 lysosomal/endosomal transmembrane protein, battenin [Source:RGD Symbol;Acc:1359537]
ENSRNOG00000025793	1152.76	0.218512	0.0838163	2.60704	0.00913298	0.0247363	ENSRNOG00000025793	Usp31	ubiquitin specific peptidase 31 [Source:RGD Symbol;Acc:1308183]
ENSRNOG00000020025	301.192	-0.0644525	0.113956	-0.56559	0.571673	0.684067	ENSRNOG00000020025	Slc29a2	solute carrier family 29 member 2 [Source:RGD Symbol;Acc:69296]
ENSRNOG00000010427	2251.37	0.505857	0.0759844	6.65738	2.78747e-11	6.48011e-10	ENSRNOG00000010427	Ipo7	importin 7 [Source:RGD Symbol;Acc:1310849]
ENSRNOG00000027770	1708.44	-0.0787607	0.0751818	-1.0476	0.294822	0.420599	ENSRNOG00000027770	Trpm3	transient receptor potential cation channel, subfamily M, member 3 [Source:RGD Symbol;Acc:1304888]
ENSRNOG00000019890	21.9026	-0.317524	0.328402	-0.966875	0.333606	0.461864	ENSRNOG00000019890	Folr2	folate receptor beta [Source:RGD Symbol;Acc:1308515]
ENSRNOG00000017403	63.407	-0.504281	0.194265	-2.59584	0.00943587	0.0253911	ENSRNOG00000017403	Apobr	apolipoprotein B receptor [Source:RGD Symbol;Acc:1565169]
ENSRNOG00000017976	1326.36	-0.504316	0.0743326	-6.78459	1.16417e-11	2.94949e-10	ENSRNOG00000017976	Slco2b1	solute carrier organic anion transporter family, member 2b1 [Source:RGD Symbol;Acc:621391]
ENSRNOG00000036601	671.175	0.287414	0.108549	2.64778	0.0081022	0.0223453	ENSRNOG00000036601	Exoc6	exocyst complex component 6 [Source:RGD Symbol;Acc:3653]
ENSRNOG00000015516	193.13	0.60351	0.128415	4.69968	2.60572e-06	1.97217e-05	ENSRNOG00000015516	Zng1a	Zn regulated GTPase metalloprotein activator 1A [Source:RGD Symbol;Acc:708495]
ENSRNOG00000018262	1824.26	-0.0636027	0.0530008	-1.20003	0.230126	0.346253	ENSRNOG00000018262	Ampd3	adenosine monophosphate deaminase 3 [Source:RGD Symbol;Acc:2111]
ENSRNOG00000046181	21.869	-0.593841	0.407193	-1.45838	0.144737	0.239859	ENSRNOG00000046181	Anks4b	ankyrin repeat and sterile alpha motif domain containing 4B [Source:RGD Symbol;Acc:1584204]
ENSRNOG00000029501	118.602	-0.156895	0.138306	-1.1344	0.256627	0.377651	ENSRNOG00000029501	Hoga1	4-hydroxy-2-oxoglutarate aldolase 1 [Source:RGD Symbol;Acc:1310475]
ENSRNOG00000017158	17051.7	0.165306	0.0633308	2.6102	0.00904906	0.0245446	ENSRNOG00000017158	Eif4g2	eukaryotic translation initiation factor 4, gamma 2 [Source:RGD Symbol;Acc:1305294]
ENSRNOG00000018468	1839.69	-0.216074	0.0718725	-3.00636	0.002644	0.00864257	ENSRNOG00000018468	Ldb1	LIM domain binding 1 [Source:RGD Symbol;Acc:1310359]
ENSRNOG00000047386	1628.71	0.185584	0.0857349	2.16463	0.0304162	0.0676781	ENSRNOG00000047386	Smg1	SMG1, nonsense mediated mRNA decay associated PI3K related kinase [Source:RGD Symbol;Acc:1563508]
ENSRNOG00000019372	2797.23	-0.302686	0.0578897	-5.22867	1.70732e-07	1.73494e-06	ENSRNOG00000019372	Pc	pyruvate carboxylase [Source:RGD Symbol;Acc:3262]
ENSRNOG00000017977	2074.58	-0.156624	0.0561115	-2.79129	0.00524978	0.0155106	ENSRNOG00000017977	Smpd1	sphingomyelin phosphodiesterase 1 [Source:RGD Symbol;Acc:1549719]
ENSRNOG00000063613	1062.02	-0.0455144	0.0651183	-0.69895	0.484583	0.608651	ENSRNOG00000063613	Chid1	chitinase domain containing 1 [Source:RGD Symbol;Acc:1308955]
ENSRNOG00000017767	237.252	-0.610294	0.15489	-3.94018	8.1422e-05	0.000414631	ENSRNOG00000017767	Irag1	inositol 1,4,5-triphosphate receptor associated 1 [Source:RGD Symbol;Acc:1309828]
ENSRNOG00000018020	6231.26	-0.133468	0.0762894	-1.7495	0.0802051	0.149452	ENSRNOG00000018020	Apbb1	amyloid beta precursor protein binding family B member 1 [Source:RGD Symbol;Acc:2122]
ENSRNOG00000013176	1587.03	0.776549	0.0871012	8.91547	4.85739e-19	5.00746e-17	ENSRNOG00000013176	Far1	fatty acyl CoA reductase 1 [Source:RGD Symbol;Acc:1306647]
ENSRNOG00000009523	1344.92	0.572987	0.0871101	6.57773	4.77681e-11	1.05006e-09	ENSRNOG00000009523	Rab11fip2	RAB11 family interacting protein 2 [Source:RGD Symbol;Acc:1308538]
ENSRNOG00000016980	66.662	-0.38573	0.220161	-1.75204	0.0797674	0.148822	ENSRNOG00000016980	Qprt	quinolinate phosphoribosyltransferase [Source:RGD Symbol;Acc:1310309]
ENSRNOG00000031211	20.3558	-0.478166	0.409329	-1.16817	0.242738	0.360573	ENSRNOG00000031211	Acsm5	acyl-CoA synthetase medium-chain family member 5 [Source:RGD Symbol;Acc:1309578]
ENSRNOG00000015894	266.047	-0.282187	0.104988	-2.6878	0.00719239	0.020209	ENSRNOG00000015894	Dock8	dedicator of cytokinesis 8 [Source:RGD Symbol;Acc:1561588]
ENSRNOG00000043225	132.735	-0.730189	0.195158	-3.74152	0.000182907	0.000846731	ENSRNOG00000043225	Zfp771	zinc finger protein 771 [Source:RGD Symbol;Acc:1305903]
ENSRNOG00000013744	130.558	-0.330053	0.145651	-2.26606	0.0234478	0.0545776	ENSRNOG00000013744	Akip1	A-kinase interacting protein 1 [Source:RGD Symbol;Acc:1306959]
ENSRNOG00000019356	367.494	-0.527257	0.154566	-3.41121	0.000646764	0.0025556	ENSRNOG00000019356	Lrfn4	leucine rich repeat and fibronectin type III domain containing 4 [Source:RGD Symbol;Acc:1585286]
ENSRNOG00000026579	22.1705	0.308321	0.335932	0.917809	0.358719	0.486506	ENSRNOG00000026579	AC119332.1
ENSRNOG00000069185	3099.09	-0.0121982	0.0645886	-0.18886	0.850203	0.900951	ENSRNOG00000069185	Tmem9b	TMEM9 domain family, member B [Source:RGD Symbol;Acc:1310775]
ENSRNOG00000019708	1984.84	-0.0435601	0.0595956	-0.730928	0.464823	0.589879	ENSRNOG00000019708	Ctsf	cathepsin F [Source:RGD Symbol;Acc:1308181]
ENSRNOG00000019745	47.9694	-0.315923	0.246177	-1.28332	0.199381	0.309891	ENSRNOG00000019745	Actn3	actinin alpha 3 [Source:RGD Symbol;Acc:621792]
ENSRNOG00000013290	1229.7	0.643733	0.0775161	8.30451	1.00229e-16	6.54247e-15	ENSRNOG00000013290	Nrip3	nuclear receptor interacting protein 3 [Source:RGD Symbol;Acc:1304777]
ENSRNOG00000019825	323.791	-0.0785734	0.0910046	-0.863401	0.387917	0.515293	ENSRNOG00000019825	Zdhhc24	zinc finger, DHHC-type containing 24 [Source:RGD Symbol;Acc:1565630]
ENSRNOG00000013934	1071.85	-0.355925	0.0796881	-4.46648	7.95172e-06	5.25474e-05	ENSRNOG00000013934	Dennd2b	DENN domain containing 2B [Source:RGD Symbol;Acc:1308995]
ENSRNOG00000020300	179.402	0.193463	0.163776	1.18126	0.237498	0.354763	ENSRNOG00000020300	Lsp1	lymphocyte-specific protein 1 [Source:RGD Symbol;Acc:1306133]
ENSRNOG00000019832	876.218	-0.203172	0.0766677	-2.65003	0.00804838	0.0222385	ENSRNOG00000019832	Bbs1	Bardet-Biedl syndrome 1 [Source:RGD Symbol;Acc:1307581]
ENSRNOG00000016063	1063.54	-0.159478	0.0595705	-2.67714	0.00742544	0.0207662	ENSRNOG00000016063	Vps35l	VPS35 endosomal protein sorting factor like [Source:RGD Symbol;Acc:1564485]
ENSRNOG00000012911	825.726	0.294063	0.0796866	3.69024	0.000224046	0.00101394	ENSRNOG00000012911	Erlin1	ER lipid raft associated 1 [Source:RGD Symbol;Acc:1307058]
ENSRNOG00000059968	943.066	0.155167	0.0828493	1.87288	0.0610843	0.119781	ENSRNOG00000059968	Jak2	Janus kinase 2 [Source:RGD Symbol;Acc:2939]
ENSRNOG00000070112	943.542	0.0431488	0.0688533	0.626677	0.530871	0.650661	ENSRNOG00000070112	Knop1	lysine-rich nucleolar protein 1 [Source:RGD Symbol;Acc:1565096]
ENSRNOG00000031485	908.811	-0.0602835	0.0717998	-0.839606	0.401129	0.528195	ENSRNOG00000031485	Dpp3	dipeptidylpeptidase 3 [Source:RGD Symbol;Acc:621127]
ENSRNOG00000036758	331.303	-0.194494	0.0945324	-2.05743	0.0396451	0.0841424	ENSRNOG00000036758	Iqck	IQ motif containing K [Source:RGD Symbol;Acc:6502881]
ENSRNOG00000020113	450.081	0.097996	0.0818429	1.19737	0.231163	0.34715	ENSRNOG00000020113	Cnnm2	cyclin and CBS domain divalent metal cation transport mediator 2 [Source:RGD Symbol;Acc:1308162]
ENSRNOG00000016013	11799.1	-0.219903	0.0510478	-4.30778	1.64901e-05	0.000101828	ENSRNOG00000016013	Gprc5b	G protein-coupled receptor, class C, group 5, member B [Source:RGD Symbol;Acc:1309510]
ENSRNOG00000019693	1405.61	0.00122157	0.0587561	0.0207905	0.983413	0.989748	ENSRNOG00000019693	Clpb	caseinolytic mitochondrial matrix peptidase chaperone subunit B [Source:RGD Symbol;Acc:621328]
ENSRNOG00000063290	861.539	-0.199105	0.0686384	-2.90078	0.00372234	0.0115799	ENSRNOG00000063290	Hs3st4	heparan sulfate-glucosamine 3-sulfotransferase 4 [Source:RGD Symbol;Acc:11422907]
ENSRNOG00000018604	1291.29	-0.0625131	0.0543673	-1.14983	0.250215	0.369842	ENSRNOG00000018604	Tufm	Tu translation elongation factor, mitochondrial [Source:RGD Symbol;Acc:1305501]
ENSRNOG00000049181	1489.78	-0.199697	0.0717245	-2.78422	0.00536566	0.0157979	ENSRNOG00000049181	Sh2b1	SH2B adaptor protein 1 [Source:RGD Symbol;Acc:620132]
ENSRNOG00000069369	41.5126	-0.0498753	0.255922	-0.194885	0.845483	0.898179	ENSRNOG00000069369	LOC691519	similar to ankyrin repeat domain 26 [Source:RGD Symbol;Acc:1582795]
ENSRNOG00000036742	4538.61	0.100031	0.0631151	1.58491	0.112988	0.197861	ENSRNOG00000036742	Uqcrc2	ubiquinol cytochrome c reductase core protein 2 [Source:RGD Symbol;Acc:1359150]
ENSRNOG00000015310	97.3031	-0.724715	0.193257	-3.75001	0.000176828	0.000820369	ENSRNOG00000015310	Lrrc32	leucine rich repeat containing 32 [Source:RGD Symbol;Acc:1309087]
ENSRNOG00000027456	192.187	-0.253235	0.143192	-1.7685	0.0769767	0.144626	ENSRNOG00000027456	Cdc42bpg	CDC42 binding protein kinase gamma [Source:RGD Symbol;Acc:1307260]
ENSRNOG00000016292	22.4537	-0.231056	0.323775	-0.713631	0.475455	0.60006	ENSRNOG00000016292	Pdzd9	PDZ domain containing 9 [Source:RGD Symbol;Acc:1560558]
ENSRNOG00000019950	193.69	-0.160417	0.133938	-1.19769	0.231037	0.347055	ENSRNOG00000019950	Peli3	pellino E3 ubiquitin protein ligase family member 3 [Source:RGD Symbol;Acc:1305989]
ENSRNOG00000017260	936.207	0.336058	0.1079	3.11454	0.00184231	0.00633369	ENSRNOG00000017260	Cdr2	cerebellar degeneration-related protein 2 [Source:RGD Symbol;Acc:1310578]
ENSRNOG00000020010	1270.59	0.0675687	0.0663192	1.01884	0.308278	0.435388	ENSRNOG00000020010	Kctd13	potassium channel tetramerization domain containing 13 [Source:RGD Symbol;Acc:735189]
ENSRNOG00000016343	1360.49	0.333384	0.11077	3.00969	0.00261517	0.00855396	ENSRNOG00000016343	Dkk3	dickkopf WNT signaling pathway inhibitor 3 [Source:RGD Symbol;Acc:621846]
ENSRNOG00000032929	127.488	-0.093587	0.136476	-0.685739	0.492878	0.615809	ENSRNOG00000032929	Incenp	inner centromere protein [Source:RGD Symbol;Acc:1305292]
ENSRNOG00000027213	446.789	-0.303672	0.121202	-2.50551	0.0122276	0.0316992	ENSRNOG00000027213	Asphd1	aspartate beta-hydroxylase domain containing 1 [Source:RGD Symbol;Acc:1306636]
ENSRNOG00000019613	311.202	0.0550018	0.121835	0.451444	0.65167	0.752562	ENSRNOG00000019613	Syt9	synaptotagmin 9 [Source:RGD Symbol;Acc:621169]
ENSRNOG00000026942	767.556	0.381466	0.0862473	4.42293	9.73694e-06	6.32541e-05	ENSRNOG00000026942	RGD1311595	similar to KIAA2026 protein [Source:RGD Symbol;Acc:1311595]
ENSRNOG00000024144	1906.64	0.0484035	0.0609082	0.794696	0.42679	0.55331	ENSRNOG00000024144	Cdipt	CDP-diacylglycerol--inositol 3-phosphatidyltransferase [Source:RGD Symbol;Acc:620576]
ENSRNOG00000016748	727.687	-0.219142	0.111997	-1.95668	0.0503855	0.102276	ENSRNOG00000016748	Poll	DNA polymerase lambda [Source:RGD Symbol;Acc:1308053]
ENSRNOG00000017622	187.706	0.0676833	0.125736	0.538298	0.590371	0.699609	ENSRNOG00000017622	Npm3	nucleophosmin/nucleoplasmin, 3 [Source:RGD Symbol;Acc:1565542]
ENSRNOG00000010752	1082.64	0.42065	0.0864896	4.86358	1.15279e-06	9.58391e-06	ENSRNOG00000010752	Tmem41b	transmembrane protein 41B [Source:RGD Symbol;Acc:1310870]
ENSRNOG00000062870	3520.24	0.0940338	0.0714724	1.31566	0.188287	0.296108	ENSRNOG00000062870	rnf141	ring finger protein 141 [Source:RGD Symbol;Acc:1303154]
ENSRNOG00000019662	507.623	0.51522	0.130702	3.94195	8.08228e-05	0.000411912	ENSRNOG00000019662	Tm6sf1	transmembrane 6 superfamily member 1 [Source:RGD Symbol;Acc:1307978]
ENSRNOG00000020179	1764.52	-0.0657043	0.0482611	-1.36143	0.173377	0.277358	ENSRNOG00000020179	Nt5c2	5'-nucleotidase, cytosolic II [Source:RGD Symbol;Acc:2323387]
ENSRNOG00000026754	2443.67	0.077274	0.0694071	1.11335	0.26556	0.387922	ENSRNOG00000026754	Usp47	ubiquitin specific peptidase 47 [Source:RGD Symbol;Acc:1310411]
ENSRNOG00000018164	2179.92	0.392473	0.0665435	5.898	3.67943e-09	5.45636e-08	ENSRNOG00000018164	Spcs2	signal peptidase complex subunit 2 [Source:RGD Symbol;Acc:1311253]
ENSRNOG00000009910	775.862	-0.363158	0.0739928	-4.90802	9.20013e-07	7.84504e-06	ENSRNOG00000009910	Swap70	switching B-cell complex subunit SWAP70 [Source:RGD Symbol;Acc:1305579]
ENSRNOG00000019740	1095.39	0.593015	0.0793615	7.47233	7.87882e-14	3.19167e-12	ENSRNOG00000019740	Hdgfl3	HDGF like 3 [Source:RGD Symbol;Acc:628773]
ENSRNOG00000017241	1536.45	-0.0141047	0.0520136	-0.271174	0.786257	0.854762	ENSRNOG00000017241	Dpcd	deleted in primary ciliary dyskinesia [Source:RGD Symbol;Acc:1307648]
ENSRNOG00000036572	225.643	0.0722891	0.126778	0.570201	0.568541	0.681643	ENSRNOG00000036572	Sfxn4	sideroflexin 4 [Source:RGD Symbol;Acc:1306088]
ENSRNOG00000046211	870.59	-0.302336	0.081131	-3.72651	0.000194148	0.000894062	ENSRNOG00000046211	Fbxw4	F-box and WD repeat domain containing 4 [Source:RGD Symbol;Acc:1306518]
ENSRNOG00000022619	50195.2	-0.102523	0.0600869	-1.70625	0.0879613	0.161133	ENSRNOG00000022619	Fth1	ferritin heavy chain 1 [Source:RGD Symbol;Acc:2635]
ENSRNOG00000022732	585.41	-0.0085062	0.0669401	-0.127072	0.898884	0.933091	ENSRNOG00000022732	Tmem126b	transmembrane protein 126B [Source:RGD Symbol;Acc:1308371]
ENSRNOG00000020248	3256	0.552522	0.0618085	8.93926	3.91793e-19	4.15356e-17	ENSRNOG00000020248	Ina	internexin neuronal intermediate filament protein, alpha [Source:RGD Symbol;Acc:2911]
ENSRNOG00000020376	300.866	0.0714819	0.0994748	0.718593	0.472392	0.596946	ENSRNOG00000020376	Stn1	STN1 subunit of CST complex [Source:RGD Symbol;Acc:1305637]
ENSRNOG00000020339	5910.32	-0.596552	0.09916	-6.01605	1.78719e-09	2.83598e-08	ENSRNOG00000020339	Neurl1	neuralized E3 ubiquitin protein ligase 1 [Source:RGD Symbol;Acc:1307021]
ENSRNOG00000047545	109.065	-0.44552	0.159324	-2.79631	0.00516892	0.0153061	ENSRNOG00000047545	Adra2a	adrenoceptor alpha 2A [Source:RGD Symbol;Acc:2056]
ENSRNOG00000014574	1139.48	-0.0152985	0.0806208	-0.189758	0.849499	0.900461	ENSRNOG00000014574	Entpd1	ectonucleoside triphosphate diphosphohydrolase 1 [Source:RGD Symbol;Acc:69265]
ENSRNOG00000015235	634.457	0.200207	0.0729595	2.74409	0.00606787	0.0175068	ENSRNOG00000015235	Fra10ac1	FRA10A associated CGG repeat 1 [Source:RGD Symbol;Acc:1309482]
ENSRNOG00000020349	225.144	-0.290165	0.11296	-2.56873	0.0102071	0.0271778	ENSRNOG00000020349	Rab3il1	RAB3A interacting protein-like 1 [Source:RGD Symbol;Acc:619764]
ENSRNOG00000020353	301.266	-0.295748	0.132837	-2.2264	0.0259872	0.0594367	ENSRNOG00000020353	Sh3pxd2a	SH3 and PX domains 2A [Source:RGD Symbol;Acc:1311185]
ENSRNOG00000050585	8284	0.215364	0.0384874	5.5957	2.1973e-08	2.71224e-07	ENSRNOG00000050585	Pgam1	phosphoglycerate mutase 1 [Source:RGD Symbol;Acc:3312]
ENSRNOG00000048708	391.182	0.0533131	0.0885593	0.602005	0.547171	0.664212	ENSRNOG00000048708	Exosc1	exosome component 1 [Source:RGD Symbol;Acc:1591855]
ENSRNOG00000014758	1446.84	0.433972	0.0810254	5.356	8.50852e-08	9.35875e-07	ENSRNOG00000014758	Lgi1	leucine-rich, glioma inactivated 1 [Source:RGD Symbol;Acc:628742]
ENSRNOG00000020385	349.556	0.0978771	0.0968076	1.01105	0.311994	0.439141	ENSRNOG00000020385	Fads3	fatty acid desaturase 3 [Source:RGD Symbol;Acc:628876]
ENSRNOG00000016172	640.071	0.190694	0.0825535	2.30994	0.0208912	0.0495765	ENSRNOG00000016172	Ric1	RIC1 homolog, RAB6A GEF complex partner 1 [Source:RGD Symbol;Acc:1310016]
ENSRNOG00000046530	443.335	-0.0696638	0.0885677	-0.78656	0.43154	0.557726	ENSRNOG00000046530	Zdhhc16	zinc finger DHHC-type palmitoyltransferase 16 [Source:RGD Symbol;Acc:1591893]
ENSRNOG00000017438	137.072	-0.564493	0.170111	-3.31838	0.000905428	0.00342381	ENSRNOG00000017438	Gfra1	GDNF family receptor alpha 1 [Source:RGD Symbol;Acc:2681]
ENSRNOG00000045752	849.122	-0.0364588	0.084838	-0.429746	0.66738	0.76509	ENSRNOG00000045752	Rrm1	ribonucleotide reductase catalytic subunit M1 [Source:RGD Symbol;Acc:1592569]
ENSRNOG00000012552	933.62	-0.0295264	0.0813098	-0.363135	0.716504	0.804524	ENSRNOG00000012552	Ints4	integrator complex subunit 4 [Source:RGD Symbol;Acc:1305036]
ENSRNOG00000020440	1850.92	-0.682247	0.0630409	-10.8223	2.69981e-27	1.39161e-24	ENSRNOG00000020440	Fads2	fatty acid desaturase 2 [Source:RGD Symbol;Acc:68339]
ENSRNOG00000012584	226.201	0.0189378	0.0997802	0.189796	0.849469	0.900461	ENSRNOG00000012584	Aamdc	adipogenesis associated, Mth938 domain containing [Source:RGD Symbol;Acc:1561459]
ENSRNOG00000012820	4265.56	-0.0417754	0.0601101	-0.694981	0.487067	0.610949	ENSRNOG00000012820	Add3	adducin 3 [Source:RGD Symbol;Acc:2043]
ENSRNOG00000053923	1071.62	0.0466526	0.0778057	0.599604	0.54877	0.665775	ENSRNOG00000053923	Thap12	THAP domain containing 12 [Source:RGD Symbol;Acc:1309679]
ENSRNOG00000022635	2330.14	0.129109	0.087377	1.4776	0.139514	0.233559	ENSRNOG00000022635	Dlg2	discs large MAGUK scaffold protein 2 [Source:RGD Symbol;Acc:619895]
ENSRNOG00000046769	621.113	-0.0905918	0.0720838	-1.25676	0.208842	0.321174	ENSRNOG00000046769	Mms19	MMS19 homolog, cytosolic iron-sulfur assembly component [Source:RGD Symbol;Acc:727890]
ENSRNOG00000024194	560.968	0.0456412	0.0763706	0.597628	0.550088	0.666871	ENSRNOG00000024194	Rsf1	remodeling and spacing factor 1 [Source:RGD Symbol;Acc:1311245]
ENSRNOG00000026204	301.313	-0.00366103	0.106361	-0.0344209	0.972542	0.983098	ENSRNOG00000026204	Dclre1a	DNA cross-link repair 1A [Source:RGD Symbol;Acc:1306156]
ENSRNOG00000067387	1276.59	-0.189649	0.0823212	-2.30377	0.0212353	0.0502335	ENSRNOG00000067387	Sbk1	SH3 domain binding kinase 1 [Source:RGD Symbol;Acc:628713]
ENSRNOG00000015221	3036.95	-0.0973154	0.0418014	-2.32804	0.0199098	0.0476005	ENSRNOG00000015221	Eif3f	eukaryotic translation initiation factor 3, subunit F [Source:RGD Symbol;Acc:1306112]
ENSRNOG00000010915	1553.7	-0.00599399	0.0711514	-0.0842427	0.932863	0.955244	ENSRNOG00000010915	Ermp1	endoplasmic reticulum metallopeptidase 1 [Source:RGD Symbol;Acc:727831]
ENSRNOG00000015713	221.487	-0.158328	0.122022	-1.29754	0.194447	0.30391	ENSRNOG00000015713	Parva	parvin, alpha [Source:RGD Symbol;Acc:71021]
ENSRNOG00000016948	256.68	-0.190122	0.129926	-1.46332	0.143381	0.238378	ENSRNOG00000016948	Nhlrc2	NHL repeat containing 2 [Source:RGD Symbol;Acc:1307348]
ENSRNOG00000020424	141.253	0.519213	0.141102	3.6797	0.000233512	0.00105137	ENSRNOG00000020424	Plpp4	phospholipid phosphatase 4 [Source:RGD Symbol;Acc:1306289]
ENSRNOG00000046566	248.101	-0.0148181	0.150522	-0.0984446	0.921579	0.94757	ENSRNOG00000046566	Tub	TUB bipartite transcription factor [Source:RGD Symbol;Acc:3918]
ENSRNOG00000057623	1716.76	0.146418	0.0710695	2.06021	0.0393783	0.083695	ENSRNOG00000057623	Copb1	COPI coat complex subunit beta 1 [Source:RGD Symbol;Acc:620861]
ENSRNOG00000012763	676.581	0.011121	0.0786276	0.141439	0.887523	0.925494	ENSRNOG00000012763	Cwf19l1	CWF19 like cell cycle control factor 1 [Source:RGD Symbol;Acc:1304716]
ENSRNOG00000017201	2563.57	-0.0484055	0.0583756	-0.829207	0.406987	0.533528	ENSRNOG00000017201	Cd2bp2	Cd2 (cytoplasmic tail) binding protein 2 [Source:RGD Symbol;Acc:1311741]
ENSRNOG00000014691	809.149	0.168309	0.0745014	2.25914	0.0238748	0.0554315	ENSRNOG00000014691	Ric3	RIC3 acetylcholine receptor chaperone [Source:RGD Symbol;Acc:1588939]
ENSRNOG00000056216	157.907	-0.208782	0.131358	-1.58941	0.111968	0.196535	ENSRNOG00000056216	Casp7	caspase 7 [Source:RGD Symbol;Acc:620944]
ENSRNOG00000011745	1638.69	0.286822	0.0627271	4.57253	4.81865e-06	3.37373e-05	ENSRNOG00000011745	Psma1	proteasome 20S subunit alpha 1 [Source:RGD Symbol;Acc:61841]
ENSRNOG00000070303	40.7274	0.825735	0.27116	3.04519	0.00232532	0.0077535	ENSRNOG00000070303
ENSRNOG00000056562	1509.01	-0.0701784	0.0775422	-0.905034	0.365447	0.493246	ENSRNOG00000056562	Olfml1	olfactomedin-like 1 [Source:RGD Symbol;Acc:1311854]
ENSRNOG00000065255	646.219	-0.162976	0.0976225	-1.66945	0.0950273	0.171637	ENSRNOG00000065255	Gsg1l	GSG1-like [Source:RGD Symbol;Acc:1562278]
ENSRNOG00000011339	1077.28	0.190026	0.101822	1.86625	0.062006	0.121286	ENSRNOG00000011339	Slk	STE20-like kinase [Source:RGD Symbol;Acc:3780]
ENSRNOG00000031643	505.169	-0.728938	0.0930909	-7.83039	4.86351e-15	2.4644e-13	ENSRNOG00000031643	Dchs1	dachsous cadherin-related 1 [Source:RGD Symbol;Acc:1309878]
ENSRNOG00000019667	835.59	-0.18351	0.0962664	-1.90627	0.0566147	0.112642	ENSRNOG00000019667	Ppfibp2	PPFIA binding protein 2 [Source:RGD Symbol;Acc:1565383]
ENSRNOG00000019369	521.507	-0.140844	0.0878588	-1.60307	0.10892	0.192212	ENSRNOG00000019369	Slx1b	SLX1 homolog B, structure-specific endonuclease subunit [Source:RGD Symbol;Acc:1311568]
ENSRNOG00000027030	27.0856	-0.508518	0.334876	-1.51853	0.128882	0.218874	ENSRNOG00000027030	Adm	adrenomedullin [Source:RGD Symbol;Acc:2047]
ENSRNOG00000047988	777.694	-0.674504	0.125885	-5.35809	8.41064e-08	9.27155e-07	ENSRNOG00000047988	Bola2	bolA family member 2 [Source:RGD Symbol;Acc:1565363]
ENSRNOG00000019430	604.921	-0.104619	0.104864	-0.997663	0.318443	0.445929	ENSRNOG00000019430	Coro1a	coronin 1A [Source:RGD Symbol;Acc:620009]
ENSRNOG00000012206	12823	-0.196863	0.0503943	-3.90645	9.36622e-05	0.000469977	ENSRNOG00000012206	Dennd5a	DENN domain containing 5A [Source:RGD Symbol;Acc:1306759]
ENSRNOG00000030807	737.176	0.00951503	0.0683658	0.139178	0.889309	0.926706	ENSRNOG00000030807	LOC100912427	nuclease-sensitive element-binding protein 1-like [Source:RGD Symbol;Acc:6486912]
ENSRNOG00000019751	281.939	0.0328153	0.104089	0.315262	0.752562	0.830023	ENSRNOG00000019751	Cyb5r2	cytochrome b5 reductase 2 [Source:RGD Symbol;Acc:1308421]
ENSRNOG00000014629	284.864	-0.220849	0.139254	-1.58595	0.11275	0.197527	ENSRNOG00000014629	Lmo1	LIM domain only 1 [Source:RGD Symbol;Acc:621166]
ENSRNOG00000017679	247.634	0.435163	0.11826	3.67972	0.000233494	0.00105137	ENSRNOG00000017679	Cckbr	cholecystokinin B receptor [Source:RGD Symbol;Acc:2290]
ENSRNOG00000047098	8037.59	-0.482968	0.289037	-1.67095	0.0947307	0.171193	ENSRNOG00000047098	Hbb	hemoglobin subunit beta [Source:RGD Symbol;Acc:2783]
ENSRNOG00000050846	134.193	-0.364049	0.139485	-2.60994	0.00905574	0.0245583	ENSRNOG00000050846	Timm10b	translocase of inner mitochondrial membrane 10B [Source:RGD Symbol;Acc:71097]
ENSRNOG00000051291	228.755	-0.217793	0.152198	-1.43098	0.152436	0.250259	ENSRNOG00000051291	Dnhd1	dynein heavy chain domain 1 [Source:RGD Symbol;Acc:1584052]
ENSRNOG00000056658	610.047	-0.0591974	0.106296	-0.556912	0.577587	0.689268	ENSRNOG00000056658	Xylt1	xylosyltransferase 1 [Source:RGD Symbol;Acc:620093]
ENSRNOG00000018320	5595.44	-0.0857505	0.0575478	-1.49008	0.136204	0.228865	ENSRNOG00000018320	Rps15a	ribosomal protein S15a [Source:RGD Symbol;Acc:619939]
ENSRNOG00000011417	404.299	0.176036	0.0991944	1.77466	0.0759543	0.143228	ENSRNOG00000011417	Pde3b	phosphodiesterase 3B [Source:RGD Symbol;Acc:61943]
ENSRNOG00000011367	35.6478	0.934185	0.26764	3.49045	0.000482206	0.00197264	ENSRNOG00000011367	Cyp2r1	cytochrome P450, family 2, subfamily r, polypeptide 1 [Source:RGD Symbol;Acc:1311866]
ENSRNOG00000067892	28.8166	0.396257	0.393889	1.00601	0.31441	0.441752	ENSRNOG00000067892	LOC100912041	uncharacterized LOC100912041 [Source:RGD Symbol;Acc:6489539]
ENSRNOG00000067218	77.4123	-0.247123	0.207906	-1.18863	0.234586	0.351291	ENSRNOG00000067218
ENSRNOG00000062713	2136.36	0.400787	0.0771917	5.19209	2.07945e-07	2.06948e-06	ENSRNOG00000062713
ENSRNOG00000065005	451.328	-0.198555	0.120258	-1.65108	0.0987223	0.177027	ENSRNOG00000065005
ENSRNOG00000066426	1046.21	0.38026	0.0979499	3.88219	0.000103518	0.000511533	ENSRNOG00000066426
ENSRNOG00000063937	2226.03	0.351685	0.0657139	5.35176	8.7101e-08	9.56639e-07	ENSRNOG00000063937
ENSRNOG00000067172	1358.53	0.689626	0.0716304	9.62756	6.11627e-22	1.20297e-19	ENSRNOG00000067172
ENSRNOG00000070479	1466.69	0.102783	0.0703392	1.46126	0.143945	0.239104	ENSRNOG00000070479
ENSRNOG00000066155	1276.08	-0.0683428	0.0574379	-1.18986	0.234103	0.350738	ENSRNOG00000066155
ENSRNOG00000067163	557.111	0.0395142	0.0997584	0.396099	0.692032	0.784565	ENSRNOG00000067163
ENSRNOG00000068916	295.148	0.539878	0.0975402	5.53492	3.11365e-08	3.70269e-07	ENSRNOG00000068916
ENSRNOG00000062328	1743.58	0.475801	0.0843213	5.64272	1.67387e-08	2.13308e-07	ENSRNOG00000062328
ENSRNOG00000067663	119.672	0.276719	0.144873	1.91008	0.0561234	0.111738	ENSRNOG00000067663
ENSRNOG00000069106	31.2407	-0.0665886	0.31973	-0.208265	0.835022	0.890861	ENSRNOG00000069106
ENSRNOG00000064113	60.7525	0.332955	0.216191	1.5401	0.123536	0.211791	ENSRNOG00000064113
ENSRNOG00000070062	61.2479	-0.252732	0.362757	-0.696697	0.485993	0.60996	ENSRNOG00000070062	LOC108348488	uncharacterized LOC108348488 [Source:RGD Symbol;Acc:11392724]
ENSRNOG00000067183	59.3611	0.368663	0.2289	1.61059	0.10727	0.189915	ENSRNOG00000067183	LOC103691053	uncharacterized LOC103691053 [Source:RGD Symbol;Acc:9431454]
ENSRNOG00000066241	48.0091	0.192848	0.279089	0.690991	0.489571	0.612889	ENSRNOG00000066241
ENSRNOG00000065487	131.027	0.0719145	0.1325	0.54275	0.587302	0.697243	ENSRNOG00000065487
ENSRNOG00000065497	544.984	0.846792	0.0992301	8.53363	1.41831e-17	1.09849e-15	ENSRNOG00000065497	LOC102547183	uncharacterized LOC102547183 [Source:RGD Symbol;Acc:7677078]
ENSRNOG00000064891	106.243	0.119238	0.207185	0.575517	0.564942	0.678709	ENSRNOG00000064891
ENSRNOG00000064120	186.199	0.399197	0.136892	2.91614	0.00354396	0.0110943	ENSRNOG00000064120
ENSRNOG00000064053	1071.72	-0.158444	0.0983976	-1.61024	0.107345	0.189974	ENSRNOG00000064053	Ctxnd1	cortexin domain containing 1 [Source:RGD Symbol;Acc:7557291]
ENSRNOG00000065190	61.8278	0.262954	0.194692	1.35061	0.17682	0.281842	ENSRNOG00000065190
ENSRNOG00000028449	355.201	0.527208	0.125234	4.20979	2.55612e-05	0.000149253	ENSRNOG00000028449	Rpl9	ribosomal protein L9 [Source:RGD Symbol;Acc:62049]
ENSRNOG00000063029	97.6067	-0.215641	0.179499	-1.20135	0.229617	0.345825	ENSRNOG00000063029
ENSRNOG00000060587	317.52	0.555234	0.122801	4.52142	6.14248e-06	4.18686e-05	ENSRNOG00000060587	AABR07002627.1
ENSRNOG00000060288	179.973	0.159085	0.145023	1.09696	0.272657	0.39612	ENSRNOG00000060288	LOC100365062	eukaryotic translation initiation factor 3, subunit 6 48kDa-like [Source:RGD Symbol;Acc:2319808]
ENSRNOG00000014252	718.273	-0.215553	0.104544	-2.06184	0.0392234	0.0834252	ENSRNOG00000014252	Irf2bp1	interferon regulatory factor 2 binding protein 1 [Source:RGD Symbol;Acc:1308312]
ENSRNOG00000063049	2815.06	0.171663	0.0595045	2.88487	0.00391573	0.012101	ENSRNOG00000063049	Pnma8c	PNMA family member 8C [Source:RGD Symbol;Acc:41230706]
ENSRNOG00000016863	8424.04	0.0817489	0.0574789	1.42224	0.154956	0.253476	ENSRNOG00000016863	Pnma8b	PNMA family member 8B [Source:RGD Symbol;Acc:1560435]
ENSRNOG00000063636	263.695	-0.000346871	0.13648	-0.00254155	0.997972	0.998573	ENSRNOG00000063636	Gng5	G protein subunit gamma 5 [Source:RGD Symbol;Acc:620807]
ENSRNOG00000065335	41.8545	-0.293653	0.269573	-1.08933	0.276009	0.399772	ENSRNOG00000065335
ENSRNOG00000050758	148.987	-0.0944242	0.16574	-0.569711	0.568874	0.681918	ENSRNOG00000050758	Epc2l1	enhancer of polycomb homolog 2 (Drosophila)-like 1 [Source:RGD Symbol;Acc:1561337]
ENSRNOG00000066033	2302.8	-0.372511	0.0731598	-5.09175	3.54782e-07	3.3375e-06	ENSRNOG00000066033	Marcksl1	MARCKS-related protein-like [Source:RGD Symbol;Acc:9082300]
ENSRNOG00000047045	415.874	0.297516	0.0987606	3.01249	0.00259111	0.00848827	ENSRNOG00000047045	Sdhaf1	succinate dehydrogenase complex assembly factor 1 [Source:RGD Symbol;Acc:1562079]
ENSRNOG00000002340	22.5427	-0.267024	0.329971	-0.809237	0.418379	0.54472	ENSRNOG00000002340	LOC100361079	ribosomal protein L36-like [Source:RGD Symbol;Acc:2320881]
ENSRNOG00000032232	165.532	0.140104	0.127479	1.09903	0.271753	0.395037	ENSRNOG00000032232	Snrpg	small nuclear ribonucleoprotein polypeptide G [Source:RGD Symbol;Acc:1584713]
ENSRNOG00000030351	227.323	0.359838	0.11725	3.06899	0.00214781	0.00725385	ENSRNOG00000030351	LOC108348989	high mobility group protein B1 pseudogene [Source:RGD Symbol;Acc:11444414]
ENSRNOG00000037364	20.4842	0.234572	0.342748	0.684385	0.493732	0.616515	ENSRNOG00000037364	Cdc42se2	CDC42 small effector 2 [Source:RGD Symbol;Acc:1563924]
ENSRNOG00000031859	560.064	-0.229562	0.0979935	-2.34262	0.0191486	0.0461221	ENSRNOG00000031859	RGD1562402	similar to 60S ribosomal protein L27a [Source:RGD Symbol;Acc:1562402]
ENSRNOG00000037348	27.2855	-0.141352	0.330068	-0.428252	0.668467	0.766057	ENSRNOG00000037348	LOC120099798	interferon-stimulated 20 kDa exonuclease-like 2 [Source:RGD Symbol;Acc:41207608]
ENSRNOG00000021128	759.348	-0.0211003	0.10641	-0.198292	0.842817	0.89643	ENSRNOG00000021128	Kcnj11	potassium inwardly-rectifying channel, subfamily J, member 11 [Source:RGD Symbol;Acc:69247]
ENSRNOG00000010172	21.8913	-0.416864	0.346506	-1.20305	0.228957	0.345178	ENSRNOG00000010172	Mkrn3	makorin, ring finger protein, 3 [Source:RGD Symbol;Acc:1311197]
ENSRNOG00000010146	2555.69	0.389078	0.0665578	5.84571	5.04408e-09	7.23598e-08	ENSRNOG00000010146	Ndn	necdin, MAGE family member [Source:RGD Symbol;Acc:1310526]
ENSRNOG00000010158	68.2008	0.434175	0.280712	1.54669	0.121938	0.209774	ENSRNOG00000010158	Magel2	MAGE family member L2 [Source:RGD Symbol;Acc:1583615]
ENSRNOG00000070574	743.629	0.281463	0.0813311	3.4607	0.000538772	0.00218254	ENSRNOG00000070574	LOC691427	ATP synthase membrane subunit 6.8PL, pseudogene 1 [Source:RGD Symbol;Acc:41312538]
ENSRNOG00000012349	774.083	0.0742955	0.0808658	0.91875	0.358226	0.486059	ENSRNOG00000012349	Tlnrd1	talin rod domain containing 1 [Source:RGD Symbol;Acc:1311666]
ENSRNOG00000048071	44.7284	0.326633	0.276776	1.18013	0.237947	0.355293	ENSRNOG00000048071	Ccdc89	coiled-coil domain-containing protein 89-like [Source:RGD Symbol;Acc:6490972]
ENSRNOG00000022941	101.557	-0.0979655	0.171584	-0.570948	0.568035	0.68125	ENSRNOG00000022941	LOC102549852	ferritin light chain 1-like [Source:RGD Symbol;Acc:7625414]
ENSRNOG00000063715	309.627	0.131411	0.103243	1.27284	0.203077	0.314275	ENSRNOG00000063715	LOC108349446	60S ribosomal protein L35a pseudogene [Source:RGD Symbol;Acc:11501622]
ENSRNOG00000018503	141.331	-0.282733	0.150095	-1.8837	0.059606	0.117483	ENSRNOG00000018503	AC098008.1
ENSRNOG00000013596	514.925	0.444333	0.0826325	5.37722	7.56462e-08	8.41339e-07	ENSRNOG00000013596	Dimt1	DIM1 rRNA methyltransferase and ribosome maturation factor [Source:RGD Symbol;Acc:1311752]
ENSRNOG00000062707	62.2075	0.48063	0.211377	2.2738	0.022978	0.05371	ENSRNOG00000062707	LOC120100725	uncharacterized LOC120100725 [Source:RGD Symbol;Acc:41172051]
ENSRNOG00000015691	2186.21	0.11314	0.0809868	1.39702	0.162408	0.263648	ENSRNOG00000015691	Inka2	inka box actin regulator 2 [Source:RGD Symbol;Acc:1306526]
ENSRNOG00000065902	64.4447	0.0563131	0.227471	0.247562	0.804473	0.867812	ENSRNOG00000065902	LOC102549789	uncharacterized LOC102549789 [Source:RGD Symbol;Acc:7645336]
ENSRNOG00000069617	108.848	0.565419	0.186918	3.02495	0.00248672	0.0082002	ENSRNOG00000069617
ENSRNOG00000016408	149.142	-0.363249	0.156874	-2.31554	0.0205834	0.0489859	ENSRNOG00000016408	Kirrel1	kirre like nephrin family adhesion molecule 1 [Source:RGD Symbol;Acc:727883]
ENSRNOG00000019455	455.294	-0.102762	0.0804999	-1.27655	0.201762	0.312922	ENSRNOG00000019455	Ap4b1	adaptor related protein complex 4 subunit beta 1 [Source:RGD Symbol;Acc:1310529]
ENSRNOG00000069092	101.202	0.351134	0.158198	2.21959	0.0264469	0.0603554	ENSRNOG00000069092
ENSRNOG00000013790	1509.15	-0.0292292	0.067428	-0.433487	0.664661	0.763142	ENSRNOG00000013790	Mfsd1	major facilitator superfamily domain containing 1 [Source:RGD Symbol;Acc:1305751]
ENSRNOG00000020893	3981.82	0.163851	0.0525073	3.12054	0.00180521	0.00623049	ENSRNOG00000020893	Snx27	sorting nexin 27 [Source:RGD Symbol;Acc:628705]
ENSRNOG00000062864	764.727	0.136976	0.11057	1.23882	0.215412	0.328805	ENSRNOG00000062864	LOC120100659	uncharacterized LOC120100659 [Source:RGD Symbol;Acc:40960165]
ENSRNOG00000062875	249.624	-0.171863	0.137591	-1.24909	0.211634	0.324262	ENSRNOG00000062875
ENSRNOG00000009468	64.7604	-0.373308	0.235692	-1.58388	0.113221	0.198153	ENSRNOG00000009468	Il12a	interleukin 12A [Source:RGD Symbol;Acc:620562]
ENSRNOG00000000096	338.651	0.201884	0.0902045	2.23807	0.0252163	0.0579541	ENSRNOG00000000096	Pdzk1	PDZ domain containing 1 [Source:RGD Symbol;Acc:70924]
ENSRNOG00000011135	502.695	0.0768529	0.0846397	0.908001	0.363878	0.491661	ENSRNOG00000011135	Gtf2b	general transcription factor IIB [Source:RGD Symbol;Acc:619735]
ENSRNOG00000066793	178.631	-0.103941	0.127892	-0.812725	0.416376	0.542631	ENSRNOG00000066793
ENSRNOG00000062826	41.5698	0.17293	0.244427	0.707492	0.479261	0.603996	ENSRNOG00000062826	Gm17651	predicted gene, 17651 [Source:RGD Symbol;Acc:150342749]
ENSRNOG00000009792	47.4646	0.0535265	0.256936	0.208327	0.834974	0.890861	ENSRNOG00000009792	Zbbx	zinc finger, B-box domain containing [Source:RGD Symbol;Acc:1308632]
ENSRNOG00000014000	1525.26	0.250295	0.0623381	4.01512	5.94149e-05	0.000315725	ENSRNOG00000014000	Kif2a	kinesin family member 2A [Source:RGD Symbol;Acc:70974]
ENSRNOG00000062674	298.604	0.330794	0.110713	2.98786	0.00280936	0.00910679	ENSRNOG00000062674
ENSRNOG00000016580	7915.21	-0.249855	0.0512559	-4.87466	1.08998e-06	9.10228e-06	ENSRNOG00000016580	Rps23	ribosomal protein S23 [Source:RGD Symbol;Acc:621039]
ENSRNOG00000065909	38.343	-0.0302573	0.2406	-0.125758	0.899924	0.933782	ENSRNOG00000065909
ENSRNOG00000009548	343.685	0.510491	0.118963	4.29116	1.77739e-05	0.000108442	ENSRNOG00000009548	Fpgt	fucose-1-phosphate guanylyltransferase [Source:RGD Symbol;Acc:735121]
ENSRNOG00000016878	771.134	0.430554	0.113129	3.80588	0.000141301	0.000674383	ENSRNOG00000016878	Plppr5	phospholipid phosphatase related 5 [Source:RGD Symbol;Acc:1309567]
ENSRNOG00000070241	1157.41	0.289251	0.0744171	3.88689	0.000101536	0.000503069	ENSRNOG00000070241
ENSRNOG00000063312	33.466	0.478521	0.287217	1.66606	0.0957014	0.172479	ENSRNOG00000063312	LOC120100783	uncharacterized LOC120100783 [Source:RGD Symbol;Acc:41047054]
ENSRNOG00000065226	51.1037	0.598017	0.227766	2.62557	0.00865029	0.0236345	ENSRNOG00000065226	Ufm1	ubiquitin-fold modifier 1 [Source:RGD Symbol;Acc:1304890]
ENSRNOG00000019023	1034.1	0.0727977	0.0828696	0.878461	0.379694	0.507143	ENSRNOG00000019023	Tars1	threonyl-tRNA synthetase 1 [Source:RGD Symbol;Acc:1359527]
ENSRNOG00000024213	867.68	0.163065	0.0913539	1.78499	0.0742637	0.140625	ENSRNOG00000024213	Golim4	golgi integral membrane protein 4 [Source:RGD Symbol;Acc:1310948]
ENSRNOG00000067530	2541.38	0.111335	0.0710863	1.56619	0.117304	0.203938	ENSRNOG00000067530	LOC103691527	uncharacterized LOC103691527 [Source:RGD Symbol;Acc:9202401]
ENSRNOG00000050321	1001.59	0.165069	0.07213	2.28849	0.0221088	0.0519299	ENSRNOG00000050321	Zzz3	zinc finger, ZZ-type containing 3 [Source:RGD Symbol;Acc:1565468]
ENSRNOG00000068643	55.2282	0.0226978	0.199173	0.11396	0.909269	0.939724	ENSRNOG00000068643
ENSRNOG00000069542	367.71	0.906225	0.138646	6.53627	6.30735e-11	1.34114e-09	ENSRNOG00000069542
ENSRNOG00000067311	1920.52	0.472775	0.0728418	6.49044	8.55848e-11	1.77437e-09	ENSRNOG00000067311
ENSRNOG00000000091	173.065	0.156185	0.158955	0.982574	0.325817	0.453969	ENSRNOG00000000091	Smad9	SMAD family member 9 [Source:RGD Symbol;Acc:71004]
ENSRNOG00000067758	1110.61	0.229338	0.0685876	3.34373	0.000826612	0.00316744	ENSRNOG00000067758	Slc10a5	solute carrier family 10, member 5 [Source:RGD Symbol;Acc:1306036]
ENSRNOG00000009388	332.464	0.65621	0.121213	5.4137	6.17359e-08	6.94029e-07	ENSRNOG00000009388	Sptssb	serine palmitoyltransferase, small subunit B [Source:RGD Symbol;Acc:2324614]
ENSRNOG00000019671	719.655	0.93109	0.100781	9.23876	2.49372e-20	3.51662e-18	ENSRNOG00000019671	Rsbn1	round spermatid basic protein 1 [Source:RGD Symbol;Acc:1307231]
ENSRNOG00000066942	639.628	0.0809878	0.0755527	1.07194	0.283748	0.407898	ENSRNOG00000066942	Cox6b1	cytochrome c oxidase subunit 6B1 [Source:RGD Symbol;Acc:1584097]
ENSRNOG00000065602	2834.12	-0.536237	0.178399	-3.00583	0.00264858	0.00865377	ENSRNOG00000065602	Ftl1-ps14	ferritin light chain 1, pseudogene 14 [Source:RGD Symbol;Acc:2324713]
ENSRNOG00000016387	3295.32	-0.226774	0.0701366	-3.23332	0.00122362	0.00444487	ENSRNOG00000016387	Rpl34	ribosomal protein L34 [Source:RGD Symbol;Acc:1309402]
ENSRNOG00000013282	2669.14	0.844701	0.0864335	9.77284	1.47265e-22	3.10044e-20	ENSRNOG00000013282	Mctp1	multiple C2 and transmembrane domain containing 1 [Source:RGD Symbol;Acc:1305199]
ENSRNOG00000069709	2011.52	0.065686	0.0589898	1.11351	0.265487	0.387922	ENSRNOG00000069709	Tmem167b	transmembrane protein 167B [Source:RGD Symbol;Acc:1564454]
ENSRNOG00000062733	100.046	0.105659	0.142479	0.741571	0.458348	0.58375	ENSRNOG00000062733	LOC102550011	uncharacterized LOC102550011 [Source:RGD Symbol;Acc:7675361]
ENSRNOG00000013886	84.1691	0.381889	0.18076	2.11269	0.0346274	0.0753874	ENSRNOG00000013886	Fyb1	FYN binding protein 1 [Source:RGD Symbol;Acc:1563421]
ENSRNOG00000047137	1875.66	0.154198	0.0754858	2.04275	0.0410776	0.0866903	ENSRNOG00000047137	Erbin	erbb2 interacting protein [Source:RGD Symbol;Acc:1562952]
ENSRNOG00000000095	703.107	0.134316	0.0757603	1.77291	0.0762438	0.143557	ENSRNOG00000000095	Gpr89b	G protein-coupled receptor 89B [Source:RGD Symbol;Acc:1304837]
ENSRNOG00000026059	891.212	-0.799779	0.132349	-6.04293	1.51338e-09	2.44298e-08	ENSRNOG00000026059	Paqr6	progestin and adipoQ receptor family member 6 [Source:RGD Symbol;Acc:1584722]
ENSRNOG00000066623	48.024	-0.516444	0.280646	-1.8402	0.0657393	0.127091	ENSRNOG00000066623
ENSRNOG00000064711	139.662	-0.0428876	0.148484	-0.288837	0.772706	0.844822	ENSRNOG00000064711
ENSRNOG00000050343	459.165	0.0868595	0.0906925	0.957736	0.338196	0.466119	ENSRNOG00000050343	Jmy	junction mediating and regulatory protein, p53 cofactor [Source:RGD Symbol;Acc:1585601]
ENSRNOG00000067315	195.667	0.283146	0.135459	2.09027	0.0365938	0.0787396	ENSRNOG00000067315
ENSRNOG00000016872	3737.46	0.654303	0.084913	7.70557	1.30262e-14	6.02836e-13	ENSRNOG00000016872	Plppr4	phospholipid phosphatase related 4 [Source:RGD Symbol;Acc:727806]
ENSRNOG00000065873	225.803	0.335597	0.117561	2.85466	0.00430825	0.0130974	ENSRNOG00000065873
ENSRNOG00000065683	106.279	0.271923	0.173168	1.57029	0.116348	0.202654	ENSRNOG00000065683
ENSRNOG00000067598	400.982	-0.245693	0.356854	-0.688497	0.49114	0.614202	ENSRNOG00000067598
ENSRNOG00000046947	1374.84	0.190794	0.0854645	2.23244	0.025586	0.0586775	ENSRNOG00000046947	Ak5	adenylate kinase 5 [Source:RGD Symbol;Acc:1590818]
ENSRNOG00000064998	86.666	-0.0696822	0.170464	-0.408779	0.682702	0.777407	ENSRNOG00000064998
ENSRNOG00000032002	524.902	0.0790495	0.13037	0.606349	0.544283	0.662033	ENSRNOG00000032002	Hapln1	hyaluronan and proteoglycan link protein 1 [Source:RGD Symbol;Acc:2412]
ENSRNOG00000060538	74.3263	0.346203	0.174622	1.98258	0.0474145	0.0973294	ENSRNOG00000060538	Cdc42se1	CDC42 small effector 1 [Source:RGD Symbol;Acc:1561700]
ENSRNOG00000015226	819.618	0.373435	0.079255	4.71182	2.45516e-06	1.87053e-05	ENSRNOG00000015226	Man1a2	mannosidase, alpha, class 1A, member 2 [Source:RGD Symbol;Acc:1309767]
ENSRNOG00000042814	26.8453	0.322627	0.293883	1.09781	0.272287	0.395621	ENSRNOG00000042814	Henmt1	HEN methyltransferase 1 [Source:RGD Symbol;Acc:1306230]
ENSRNOG00000042068	1432.88	-0.00052408	0.0899079	-0.00582907	0.995349	0.996893	ENSRNOG00000042068	Otud7b	OTU deubiquitinase 7B [Source:RGD Symbol;Acc:1308111]
ENSRNOG00000048043	617.159	-0.260736	0.113517	-2.29688	0.0216255	0.0509549	ENSRNOG00000048043	F2r	coagulation factor II (thrombin) receptor [Source:RGD Symbol;Acc:2586]
ENSRNOG00000009533	1141.21	0.184549	0.0732307	2.5201	0.0117322	0.0306328	ENSRNOG00000009533	Erich3	glutamate-rich 3 [Source:RGD Symbol;Acc:1593279]
ENSRNOG00000067940	56.3883	-0.198598	0.221692	-0.895829	0.370344	0.497923	ENSRNOG00000067940
ENSRNOG00000062438	714.483	0.362056	0.0853096	4.24403	2.19541e-05	0.000130537	ENSRNOG00000062438
ENSRNOG00000017105	161.721	-0.212885	0.135956	-1.56584	0.117387	0.204035	ENSRNOG00000017105	Dpyd	dihydropyrimidine dehydrogenase [Source:RGD Symbol;Acc:621218]
ENSRNOG00000062326	88.8658	0.203923	0.16829	1.21174	0.225613	0.34126	ENSRNOG00000062326
ENSRNOG00000027089	746.817	0.450858	0.107207	4.20548	2.60534e-05	0.00015189	ENSRNOG00000027089	Ell2	elongation factor for RNA polymerase II 2 [Source:RGD Symbol;Acc:1309296]
ENSRNOG00000021157	9819.78	-0.0394977	0.0702758	-0.562039	0.57409	0.6863	ENSRNOG00000021157	Ctss	cathepsin S [Source:RGD Symbol;Acc:621513]
ENSRNOG00000031247	43.979	-0.0993148	0.239477	-0.414716	0.67835	0.773731	ENSRNOG00000031247	Lekr1	leucine, glutamate and lysine rich 1 [Source:RGD Symbol;Acc:1565425]
ENSRNOG00000060329	232.822	0.374475	0.105832	3.53839	0.000402582	0.00168755	ENSRNOG00000060329	Emb	embigin [Source:RGD Symbol;Acc:621067]
ENSRNOG00000015925	764.279	0.420412	0.0749802	5.60698	2.05891e-08	2.56045e-07	ENSRNOG00000015925	Zfp131	zinc finger protein 131 [Source:RGD Symbol;Acc:1307638]
ENSRNOG00000062883	189.091	0.108883	0.121579	0.895574	0.37048	0.497995	ENSRNOG00000062883
ENSRNOG00000042536	425.975	0.338917	0.137655	2.46208	0.0138135	0.0351503	ENSRNOG00000042536	Pde4d	phosphodiesterase 4D [Source:RGD Symbol;Acc:3281]
ENSRNOG00000071119	72.5201	0.268265	0.189669	1.41438	0.15725	0.256669	ENSRNOG00000071119
ENSRNOG00000011107	189.482	0.871257	0.164028	5.31164	1.08643e-07	1.16082e-06	ENSRNOG00000011107	Pcsk1	proprotein convertase subtilisin/kexin type 1 [Source:RGD Symbol;Acc:3272]
ENSRNOG00000021176	328.358	-0.320299	0.105051	-3.04899	0.00229615	0.00767334	ENSRNOG00000021176	Mtmr11	myotubularin related protein 11 [Source:RGD Symbol;Acc:1589965]
ENSRNOG00000018068	25.6387	1.08368	0.344209	3.14831	0.00164216	0.00575412	ENSRNOG00000018068	Ndufs6	NADH:ubiquinone oxidoreductase subunit S6 [Source:RGD Symbol;Acc:3156]
ENSRNOG00000020330	2344.7	0.506553	0.0668242	7.58039	3.44521e-14	1.49706e-12	ENSRNOG00000020330	Wdr47	WD repeat domain 47 [Source:RGD Symbol;Acc:1309181]
ENSRNOG00000017874	392.507	0.39052	0.108341	3.60453	0.000312717	0.00135571	ENSRNOG00000017874	Cd53	Cd53 molecule [Source:RGD Symbol;Acc:2310]
ENSRNOG00000040166	442.799	1.07219	0.125336	8.55448	1.18401e-17	9.36431e-16	ENSRNOG00000040166	Ankrd34b	ankyrin repeat domain 34B [Source:RGD Symbol;Acc:1594383]
ENSRNOG00000021216	835.77	0.163102	0.0722534	2.25735	0.023986	0.0556053	ENSRNOG00000021216	Pex11b	peroxisomal biogenesis factor 11 beta [Source:RGD Symbol;Acc:1310353]
ENSRNOG00000021209	320.452	-0.165581	0.0978367	-1.69242	0.0905654	0.165063	ENSRNOG00000021209	Polr3gl	RNA polymerase III subunit GL [Source:RGD Symbol;Acc:1582857]
ENSRNOG00000063097	33.424	-0.287087	0.263088	-1.09122	0.275176	0.398966	ENSRNOG00000063097
ENSRNOG00000067563	23.9301	1.01899	0.392651	2.59516	0.00945461	0.0254323	ENSRNOG00000067563
ENSRNOG00000020315	1124.49	0.0755408	0.101995	0.740633	0.458916	0.584217	ENSRNOG00000020315	Taf13	TATA-box binding protein associated factor 13 [Source:RGD Symbol;Acc:1305398]
ENSRNOG00000033741	1129.93	-0.186781	0.0830247	-2.2497	0.024468	0.0565123	ENSRNOG00000033741	Ankrd34a	ankyrin repeat domain 34A [Source:RGD Symbol;Acc:1308412]
ENSRNOG00000068985	102.455	-0.0352701	0.166533	-0.211791	0.83227	0.889262	ENSRNOG00000068985
ENSRNOG00000011006	70.6769	0.188018	0.271285	0.693066	0.488268	0.612057	ENSRNOG00000011006	Stoml3	stomatin like 3 [Source:RGD Symbol;Acc:1311090]
ENSRNOG00000013055	358.488	0.147779	0.0983793	1.50213	0.133063	0.224545	ENSRNOG00000013055	Zfyve16	zinc finger FYVE-type containing 16 [Source:RGD Symbol;Acc:1564784]
ENSRNOG00000021181	869.319	-0.257828	0.0898843	-2.86844	0.00412499	0.012627	ENSRNOG00000021181	Sf3b4	splicing factor 3B subunit 4 [Source:RGD Symbol;Acc:1309667]
ENSRNOG00000064070	55.6577	0.257716	0.21348	1.20721	0.22735	0.34331	ENSRNOG00000064070	Tmem267	transmembrane protein 267 [Source:RGD Symbol;Acc:1562550]
ENSRNOG00000070757	35.6754	0.000493035	0.247055	0.00199565	0.998408	0.998875	ENSRNOG00000070757
ENSRNOG00000067555	7534.93	0.479925	0.0638788	7.51306	5.77589e-14	2.39163e-12	ENSRNOG00000067555	Sub1	SUB1 regulator of transcription [Source:RGD Symbol;Acc:621582]
ENSRNOG00000019785	1134.51	0.16015	0.0672319	2.38205	0.0172167	0.0421481	ENSRNOG00000019785	Phtf1	putative homeodomain transcription factor 1 [Source:RGD Symbol;Acc:620426]
ENSRNOG00000068393	40.2629	0.679804	0.268507	2.53179	0.0113481	0.0297704	ENSRNOG00000068393
ENSRNOG00000066880	558.164	0.47759	0.11079	4.31076	1.62694e-05	0.000100619	ENSRNOG00000066880
ENSRNOG00000068330	120.163	0.4362	0.172196	2.53316	0.0113041	0.02966	ENSRNOG00000068330
ENSRNOG00000066083	25.59	0.564779	0.316685	1.78341	0.0745195	0.140984	ENSRNOG00000066083
ENSRNOG00000021213	893.641	-0.0613258	0.0771235	-0.795164	0.426518	0.553175	ENSRNOG00000021213	Lix1l	limb and CNS expressed 1 like [Source:RGD Symbol;Acc:1593161]
ENSRNOG00000016306	1165.5	-0.109151	0.0665304	-1.64062	0.100876	0.180499	ENSRNOG00000016306	Adgrv1	adhesion G protein-coupled receptor V1 [Source:RGD Symbol;Acc:1562101]
ENSRNOG00000013217	887.004	0.678604	0.0919121	7.38319	1.54545e-13	5.80437e-12	ENSRNOG00000013217	Ttc33	tetratricopeptide repeat domain 33 [Source:RGD Symbol;Acc:1564042]
ENSRNOG00000021324	191.993	0.254181	0.120432	2.11058	0.0348082	0.0756669	ENSRNOG00000021324	C2h3orf33	similar to human chromosome 3 open reading frame 33 [Source:RGD Symbol;Acc:1565059]
ENSRNOG00000021201	2065.94	0.00876017	0.0954793	0.0917495	0.926897	0.951597	ENSRNOG00000021201	Txnip	thioredoxin interacting protein [Source:RGD Symbol;Acc:620886]
ENSRNOG00000011627	5599.99	0.495484	0.0750625	6.60095	4.08539e-11	9.07406e-10	ENSRNOG00000011627	Zfr	zinc finger RNA binding protein [Source:RGD Symbol;Acc:1311890]
ENSRNOG00000065416	52.006	-0.00497741	0.241027	-0.0206508	0.983524	0.989748	ENSRNOG00000065416
ENSRNOG00000020444	318.987	0.272165	0.147055	1.85077	0.0642025	0.124733	ENSRNOG00000020444	Hcn3	hyperpolarization-activated cyclic nucleotide-gated potassium channel 3 [Source:RGD Symbol;Acc:620691]
ENSRNOG00000070219	24.3931	0.0183789	0.32645	0.0562992	0.955103	0.970689	ENSRNOG00000070219
ENSRNOG00000012957	1066.45	0.130987	0.0700842	1.86899	0.0616238	0.120649	ENSRNOG00000012957	Sh3glb1	SH3 domain -containing GRB2-like endophilin B1 [Source:RGD Symbol;Acc:1304859]
ENSRNOG00000031136	150.034	0.479342	0.140917	3.40161	0.000669913	0.00263592	ENSRNOG00000031136	Ntng1	netrin G1 [Source:RGD Symbol;Acc:1563465]
ENSRNOG00000021217	44.941	-0.91271	0.246481	-3.70297	0.000213091	0.000971121	ENSRNOG00000021217	Itga10	integrin subunit alpha 10 [Source:RGD Symbol;Acc:1305152]
ENSRNOG00000048118	394.948	0.273092	0.0950803	2.87222	0.00407596	0.0125031	ENSRNOG00000048118	Ankra2	ankyrin repeat family A protein 2 [Source:RGD Symbol;Acc:11492057]
ENSRNOG00000067913	44.825	0.14554	0.294095	0.494875	0.620688	0.725641	ENSRNOG00000067913
ENSRNOG00000010023	464.82	0.406553	0.0866328	4.69282	2.6946e-06	2.03326e-05	ENSRNOG00000010023	Slc33a1	solute carrier family 33 member 1 [Source:RGD Symbol;Acc:620653]
ENSRNOG00000062746	663.13	0.221666	0.0845983	2.62022	0.00878734	0.0239652	ENSRNOG00000062746
ENSRNOG00000009899	2445.19	0.74717	0.0789243	9.46691	2.88233e-21	5.12918e-19	ENSRNOG00000009899	Skil	SKI-like proto-oncogene [Source:RGD Symbol;Acc:621399]
ENSRNOG00000040201	802.786	0.167698	0.0931519	1.80026	0.0718189	0.136915	ENSRNOG00000040201	Atp6ap1l	ATPase H+ transporting accessory protein 1 like [Source:RGD Symbol;Acc:1564936]
ENSRNOG00000068448	1207.84	0.601863	0.0971239	6.19686	5.76006e-10	1.00939e-08	ENSRNOG00000068448	Arl15	ADP-ribosylation factor like GTPase 15 [Source:RGD Symbol;Acc:1597407]
ENSRNOG00000048363	145.149	0.171539	0.167269	1.02553	0.305113	0.43206	ENSRNOG00000048363	Dnah5	dynein, axonemal, heavy chain 5 [Source:RGD Symbol;Acc:1560828]
ENSRNOG00000068328	215.556	-0.176609	0.202856	-0.870614	0.383965	0.511178	ENSRNOG00000068328	LOC120101245	small nucleolar RNA SNORA44 [Source:RGD Symbol;Acc:41123498]
ENSRNOG00000016298	240.706	0.875464	0.12023	7.28159	3.29899e-13	1.14644e-11	ENSRNOG00000016298	Lysmd3	LysM domain containing 3 [Source:RGD Symbol;Acc:1308805]
ENSRNOG00000019465	1166.71	0.0373453	0.0842123	0.443466	0.657429	0.757691	ENSRNOG00000019465	Gnai3	G protein subunit alpha i3 [Source:RGD Symbol;Acc:2714]
ENSRNOG00000051151	430.487	-0.0116794	0.095853	-0.121848	0.90302	0.93589	ENSRNOG00000051151	Gmps	guanine monophosphate synthase [Source:RGD Symbol;Acc:1310063]
ENSRNOG00000020360	771.409	-0.195921	0.0696344	-2.81357	0.00489952	0.0146388	ENSRNOG00000020360	Clcc1	chloride channel CLIC-like 1 [Source:RGD Symbol;Acc:708359]
ENSRNOG00000014867	645.098	0.724565	0.139502	5.19394	2.05886e-07	2.05172e-06	ENSRNOG00000014867	Synpo2	synaptopodin 2 [Source:RGD Symbol;Acc:1564779]
ENSRNOG00000018969	650.909	-0.150244	0.274984	-0.546374	0.584809	0.694945	ENSRNOG00000018969	Gpatch4	G patch domain containing 4 [Source:RGD Symbol;Acc:1311086]
ENSRNOG00000011951	4911.68	0.195653	0.0718648	2.72251	0.00647884	0.0184961	ENSRNOG00000011951	Plk2	polo-like kinase 2 [Source:RGD Symbol;Acc:620760]
ENSRNOG00000019201	911.302	-0.182073	0.0647298	-2.81281	0.00491112	0.0146676	ENSRNOG00000019201	Naxe	NAD(P)HX epimerase [Source:RGD Symbol;Acc:1304699]
ENSRNOG00000009822	200.728	-0.22198	0.161513	-1.37438	0.169323	0.272185	ENSRNOG00000009822	Tlr2	toll-like receptor 2 [Source:RGD Symbol;Acc:735138]
ENSRNOG00000012422	1746.71	0.0335418	0.0707749	0.473922	0.635556	0.73846	ENSRNOG00000012422	Tnik	TRAF2 and NCK interacting kinase [Source:RGD Symbol;Acc:1561817]
[truncated: 12,950 more rows]

## Sheet: age_TG
ensembl_geneID	baseMean	log2FoldChange	lfcSE	stat	pvalue	padj	ensembl	rgd_symbol	description
ENSRNOG00000070901	2225	-0.0594024	0.0483162	-1.22945	0.218902	0.34375	ENSRNOG00000070901	Irgq	immunity-related GTPase Q [Source:RGD Symbol;Acc:1309409]
ENSRNOG00000018029	89.8121	-0.279783	0.201142	-1.39097	0.164234	0.275158	ENSRNOG00000018029	Doc2g	double C2-like domains, gamma [Source:RGD Symbol;Acc:1307473]
ENSRNOG00000032625	251.525	0.223436	0.1003	2.22769	0.0259014	0.0634089	ENSRNOG00000032625	Zfp108	zinc finger protein 108 [Source:RGD Symbol;Acc:1564214]
ENSRNOG00000029315	59.9171	0.314562	0.210162	1.49676	0.134456	0.23474	ENSRNOG00000029315	LOC690251	similar to SUMO/sentrin specific protease 5 [Source:RGD Symbol;Acc:1582860]
ENSRNOG00000016356	10576.2	0.36895	0.0494215	7.46538	8.30592e-14	7.43393e-12	ENSRNOG00000016356	Got1	glutamic-oxaloacetic transaminase 1 [Source:RGD Symbol;Acc:2721]
ENSRNOG00000015810	21.0353	0.0593413	0.308488	0.192362	0.847459	0.90278	ENSRNOG00000015810	Trip13	thyroid hormone receptor interactor 13 [Source:RGD Symbol;Acc:1308516]
ENSRNOG00000017538	44.1372	0.11969	0.238608	0.501617	0.615937	0.727886	ENSRNOG00000017538	Lrrc27	leucine rich repeat containing 27 [Source:RGD Symbol;Acc:1559981]
ENSRNOG00000027204	1163.61	-0.318767	0.075252	-4.23599	2.27543e-05	0.000165676	ENSRNOG00000027204	Map6	microtubule-associated protein 6 [Source:RGD Symbol;Acc:61804]
ENSRNOG00000070886	849.477	0.268865	0.0606238	4.43497	9.20856e-06	7.47191e-05	ENSRNOG00000070886
ENSRNOG00000014903	1400.14	0.0447439	0.0515555	0.867878	0.385461	0.523123	ENSRNOG00000014903	Zfyve27	zinc finger FYVE-type containing 27 [Source:RGD Symbol;Acc:735177]
ENSRNOG00000021051	1204.59	-0.027526	0.0593081	-0.464119	0.642562	0.749455	ENSRNOG00000021051	Cyth2	cytohesin 2 [Source:RGD Symbol;Acc:620398]
ENSRNOG00000011160	2380.99	0.287073	0.0743088	3.86324	0.000111893	0.000643298	ENSRNOG00000011160	Sv2b	synaptic vesicle glycoprotein 2b [Source:RGD Symbol;Acc:619716]
ENSRNOG00000017748	262.252	-1.02112	0.185786	-5.49622	3.88008e-08	6.48038e-07	ENSRNOG00000017748	Nkx6-2	NK6 homeobox 2 [Source:RGD Symbol;Acc:1307280]
ENSRNOG00000016227	1815.16	0.190178	0.0606446	3.13594	0.00171303	0.00661152	ENSRNOG00000016227	Glrx3	glutaredoxin 3 [Source:RGD Symbol;Acc:69414]
ENSRNOG00000016906	70.0999	0.126228	0.18209	0.693221	0.488171	0.618903	ENSRNOG00000016906	Lipt2	lipoyl(octanoyl) transferase 2 [Source:RGD Symbol;Acc:1305211]
ENSRNOG00000027582	1264.67	-0.0144396	0.12463	-0.11586	0.907763	0.943208	ENSRNOG00000027582	Dpysl4	dihydropyrimidinase-like 4 [Source:RGD Symbol;Acc:2409]
ENSRNOG00000009830	417.24	0.464201	0.107697	4.31027	1.63057e-05	0.000123725	ENSRNOG00000009830	Fam204a	family with sequence similarity 204, member A [Source:RGD Symbol;Acc:1305500]
ENSRNOG00000013767	119.612	-0.678898	0.161591	-4.20134	2.65341e-05	0.000188872	ENSRNOG00000013767	Ccdc61	coiled-coil domain containing 61 [Source:RGD Symbol;Acc:1307390]
ENSRNOG00000067619	24.1407	-0.0855172	0.286341	-0.298655	0.765203	0.84328	ENSRNOG00000067619
ENSRNOG00000032699	23696.8	-0.280224	0.0617586	-4.53741	5.6948e-06	4.96941e-05	ENSRNOG00000032699	Ttyh1	tweety family member 1 [Source:RGD Symbol;Acc:1310103]
ENSRNOG00000018408	481.745	-0.0910254	0.083697	-1.08756	0.27679	0.41038	ENSRNOG00000018408	RGD1307554	similar to CG16812-PA [Source:RGD Symbol;Acc:1307554]
ENSRNOG00000018334	154.373	-0.173338	0.114304	-1.51647	0.1294	0.227641	ENSRNOG00000018334	Ctu1	cytosolic thiouridylase subunit 1 [Source:RGD Symbol;Acc:1308740]
ENSRNOG00000067907	848.975	0.241385	0.0815734	2.95911	0.00308525	0.0108641	ENSRNOG00000067907
ENSRNOG00000023407	368.661	-0.07243	0.0947632	-0.764326	0.444673	0.579004	ENSRNOG00000023407	Mrpl36	mitochondrial ribosomal protein L36 [Source:RGD Symbol;Acc:1306375]
ENSRNOG00000010529	58.6836	1.20579	0.271048	4.44862	8.64241e-06	7.10979e-05	ENSRNOG00000010529	Thbs2	thrombospondin 2 [Source:RGD Symbol;Acc:1310979]
ENSRNOG00000012684	883.453	0.00810659	0.0617543	0.131272	0.89556	0.934046	ENSRNOG00000012684	Bloc1s2	biogenesis of lysosomal organelles complex-1, subunit 2 [Source:RGD Symbol;Acc:1306551]
ENSRNOG00000014258	142.072	0.22784	0.154961	1.47031	0.141477	0.244235	ENSRNOG00000014258	Rab32	RAB32, member RAS oncogene family [Source:RGD Symbol;Acc:1559997]
ENSRNOG00000010918	178.826	0.197384	0.125472	1.57314	0.115687	0.209332	ENSRNOG00000010918	Cebpa	CCAAT/enhancer binding protein alpha [Source:RGD Symbol;Acc:2326]
ENSRNOG00000067027	76.176	0.0753856	0.225241	0.334689	0.73786	0.823899	ENSRNOG00000067027	LOC108349691	histone H3.3-like [Source:RGD Symbol;Acc:11381356]
ENSRNOG00000019416	924.055	-0.199126	0.0881893	-2.25793	0.0239498	0.0595776	ENSRNOG00000019416	Zfp61	zinc finger protein 94 [Source:RGD Symbol;Acc:1560430]
ENSRNOG00000014946	1366.73	0.174035	0.0593943	2.93016	0.00338785	0.0117634	ENSRNOG00000014946	Thumpd1	THUMP domain containing 1 [Source:RGD Symbol;Acc:1308854]
ENSRNOG00000020318	372.537	-0.176875	0.0853168	-2.07316	0.0381575	0.086421	ENSRNOG00000020318	Pnkp	polynucleotide kinase 3'-phosphatase [Source:RGD Symbol;Acc:1303331]
ENSRNOG00000047406	111.874	0.223473	0.141202	1.58265	0.1135	0.206074	ENSRNOG00000047406	Cfap90	cilia and flagella associated protein 90 [Source:RGD Symbol;Acc:1308544]
ENSRNOG00000050445	3940.16	0.109937	0.0580399	1.89416	0.0582033	0.121291	ENSRNOG00000050445	Gde1	glycerophosphodiester phosphodiesterase 1 [Source:RGD Symbol;Acc:621788]
ENSRNOG00000013945	274.674	0.0291047	0.0925457	0.31449	0.753149	0.83424	ENSRNOG00000013945	Itpkc	inositol-trisphosphate 3-kinase C [Source:RGD Symbol;Acc:631336]
ENSRNOG00000031947	66.6947	-0.0130165	0.198869	-0.0654525	0.947814	0.968416	ENSRNOG00000031947	LOC100361060	ribosomal protein L36-like [Source:RGD Symbol;Acc:2320900]
ENSRNOG00000016565	164.094	-0.61757	0.122097	-5.05803	4.23615e-07	5.25058e-06	ENSRNOG00000016565	Zfp524	zinc finger protein 524 [Source:RGD Symbol;Acc:1565485]
ENSRNOG00000019138	70.6876	0.0187608	0.175435	0.106938	0.914838	0.947077	ENSRNOG00000019138	Clec11a	C-type lectin domain containing 11A [Source:RGD Symbol;Acc:3627]
ENSRNOG00000065649	255.421	0.0556064	0.103547	0.537014	0.591258	0.707446	ENSRNOG00000065649	Zfp94	zinc finger protein 94 [Source:RGD Symbol;Acc:1560430]
ENSRNOG00000016574	520.957	-0.353235	0.0711793	-4.9626	6.95557e-07	8.10381e-06	ENSRNOG00000016574	Fiz1	FLT3-interacting zinc finger 1 [Source:RGD Symbol;Acc:1306359]
ENSRNOG00000055971	74.0883	0.0765743	0.170973	0.447873	0.654245	0.759054	ENSRNOG00000055971	AABR07000544.1
ENSRNOG00000055608	915.33	0.0919004	0.0589165	1.55984	0.118797	0.213282	ENSRNOG00000055608	LOC102548695	zinc finger protein 45-like [Source:RGD Symbol;Acc:7529325]
ENSRNOG00000013641	54.3677	-0.238944	0.201285	-1.18709	0.235191	0.363177	ENSRNOG00000013641	Myo7a	myosin VIIA [Source:RGD Symbol;Acc:628830]
ENSRNOG00000020347	1368.39	0.0278531	0.0560562	0.496879	0.619275	0.730848	ENSRNOG00000020347	Nup98	nucleoporin 98 and 96 precursor [Source:RGD Symbol;Acc:71033]
ENSRNOG00000065259	21.7304	-0.129716	0.297538	-0.435965	0.662862	0.766121	ENSRNOG00000065259
ENSRNOG00000016608	201.608	-0.655424	0.129042	-5.07914	3.7914e-07	4.7988e-06	ENSRNOG00000016608	Zfp579	zinc finger protein 579 [Source:RGD Symbol;Acc:1308475]
ENSRNOG00000012730	245.645	-0.44651	0.101705	-4.39026	1.13217e-05	8.94961e-05	ENSRNOG00000012730	Lrrk1	leucine-rich repeat kinase 1 [Source:RGD Symbol;Acc:1308000]
ENSRNOG00000018117	3319.64	-0.203283	0.0645115	-3.15112	0.00162647	0.00631822	ENSRNOG00000018117	Ndufv1	NADH:ubiquinone oxidoreductase core subunit V1 [Source:RGD Symbol;Acc:1359247]
ENSRNOG00000016362	143.356	-1.19606	0.181532	-6.58867	4.43785e-11	1.98614e-09	ENSRNOG00000016362	Gpr4	G protein-coupled receptor 4 [Source:RGD Symbol;Acc:1311604]
ENSRNOG00000017307	190.381	0.252114	0.12372	2.03778	0.0415717	0.0926533	ENSRNOG00000017307	Prss23	serine protease 23 [Source:RGD Symbol;Acc:1359545]
ENSRNOG00000020942	54.1091	-0.21014	0.202867	-1.03585	0.300272	0.435838	ENSRNOG00000020942	Plekha4	pleckstrin homology domain containing A4 [Source:RGD Symbol;Acc:735133]
ENSRNOG00000017079	1800.42	0.0828645	0.0782533	1.05893	0.289633	0.424621	ENSRNOG00000017079	Pgm2l1	phosphoglucomutase 2-like 1 [Source:RGD Symbol;Acc:1583226]
ENSRNOG00000017795	910.766	-0.450152	0.111266	-4.04572	5.21633e-05	0.000338428	ENSRNOG00000017795	Hspbp1	HSPA (Hsp70) binding protein 1 [Source:RGD Symbol;Acc:628677]
ENSRNOG00000052607	26.2767	-0.392864	0.276866	-1.41896	0.155909	0.264083	ENSRNOG00000052607	Snora12	small nucleolar RNA, H/ACA box 12 [Source:RGD Symbol;Acc:41366654]
ENSRNOG00000052319	239.219	-0.0493058	0.121696	-0.405156	0.685363	0.783483	ENSRNOG00000052319	AABR07004881.1
ENSRNOG00000027542	321.917	0.215472	0.100472	2.14459	0.0319853	0.0750929	ENSRNOG00000027542	LOC100302465	hypothetical LOC100302465 [Source:RGD Symbol;Acc:2311471]
ENSRNOG00000065457	206.712	0.526336	0.165717	3.17611	0.00149265	0.0058778	ENSRNOG00000065457
ENSRNOG00000021478	1592.26	0.146331	0.0672056	2.17737	0.0294529	0.0703295	ENSRNOG00000021478	Tpd52l1	TPD52 like 1 [Source:RGD Symbol;Acc:1594796]
ENSRNOG00000018090	2714.94	-0.288044	0.0730186	-3.94481	7.98648e-05	0.000484898	ENSRNOG00000018090	Ppp6r1	protein phosphatase 6, regulatory subunit 1 [Source:RGD Symbol;Acc:1311409]
ENSRNOG00000069157	160.035	0.080152	0.109556	0.731611	0.464406	0.597362	ENSRNOG00000069157	Chchd4	coiled-coil-helix-coiled-coil-helix domain containing 4 [Source:RGD Symbol;Acc:1310746]
ENSRNOG00000070519	27.6822	1.14996	0.307123	3.74429	0.000180905	0.000979419	ENSRNOG00000070519
ENSRNOG00000015230	530.841	0.0320147	0.105498	0.303461	0.761538	0.840437	ENSRNOG00000015230	Ermard	ER membrane-associated RNA degradation [Source:RGD Symbol;Acc:1309374]
ENSRNOG00000017069	956.616	-0.346373	0.0678124	-5.10781	3.25906e-07	4.20227e-06	ENSRNOG00000017069	Mark4	microtubule affinity regulating kinase 4 [Source:RGD Symbol;Acc:1591792]
ENSRNOG00000021013	313.189	0.24634	0.0953669	2.58307	0.00979251	0.0284175	ENSRNOG00000021013	Stx3	syntaxin 3 [Source:RGD Symbol;Acc:621005]
ENSRNOG00000018677	1244.5	-0.389356	0.074779	-5.20675	1.92173e-07	2.63784e-06	ENSRNOG00000018677	Akt2	AKT serine/threonine kinase 2 [Source:RGD Symbol;Acc:2082]
ENSRNOG00000019207	2407.77	-0.891865	0.108457	-8.22319	1.98159e-16	4.00281e-14	ENSRNOG00000019207	Shank1	SH3 and multiple ankyrin repeat domains 1 [Source:RGD Symbol;Acc:621011]
ENSRNOG00000070234	236.938	0.340853	0.107101	3.18253	0.00145995	0.00577184	ENSRNOG00000070234	Zfp141	zinc finger protein 141 [Source:RGD Symbol;Acc:1597345]
ENSRNOG00000063629	165.057	0.394298	0.109362	3.60543	0.000311639	0.00156848	ENSRNOG00000063629
ENSRNOG00000016714	56.1893	-0.149741	0.214169	-0.699171	0.484445	0.615406	ENSRNOG00000016714	Nrap	nebulin-related anchoring protein [Source:RGD Symbol;Acc:1306731]
ENSRNOG00000015734	744.157	0.218381	0.0871334	2.50628	0.0122009	0.0340577	ENSRNOG00000015734	Ube3a	ubiquitin protein ligase E3A [Source:RGD Symbol;Acc:1306361]
ENSRNOG00000068800	399.754	0.40754	0.0998879	4.07997	4.50409e-05	0.000296596	ENSRNOG00000068800
ENSRNOG00000069276	219.32	0.126024	0.100349	1.25586	0.209167	0.332019	ENSRNOG00000069276	LOC102548320	zinc finger protein 845-like [Source:RGD Symbol;Acc:7683572]
ENSRNOG00000049772	166.273	-0.136321	0.129564	-1.05216	0.292728	0.427983	ENSRNOG00000049772	Gemin7	gem (nuclear organelle) associated protein 7 [Source:RGD Symbol;Acc:1597035]
ENSRNOG00000053859	873.286	0.235008	0.0830805	2.82868	0.00467408	0.0153455	ENSRNOG00000053859	Ranbp6	RAN binding protein 6 [Source:RGD Symbol;Acc:1305165]
ENSRNOG00000066647	35.5274	-0.344382	0.318359	-1.08174	0.279368	0.413178	ENSRNOG00000066647
ENSRNOG00000066887	45.3784	0.15681	0.215856	0.726455	0.46756	0.599795	ENSRNOG00000066887	LOC102556805	rho GTPase-activating protein 20-like [Source:RGD Symbol;Acc:7734973]
ENSRNOG00000018915	39.7316	-0.0738679	0.313006	-0.235995	0.813436	0.87983	ENSRNOG00000018915	Tagap	T-cell activation RhoGTPase activating protein [Source:RGD Symbol;Acc:1308618]
ENSRNOG00000020358	2421.72	-0.371098	0.179268	-2.07007	0.0384454	0.0870071	ENSRNOG00000020358	Ptov1	PTOV1, extended AT-hook containing adaptor protein [Source:RGD Symbol;Acc:1306977]
ENSRNOG00000064667	23.8184	0.256976	0.313683	0.819224	0.412658	0.548792	ENSRNOG00000064667	Tmem86b	transmembrane protein 86B [Source:RGD Symbol;Acc:1593455]
ENSRNOG00000053502	3740.56	-0.16051	0.0826337	-1.94242	0.052086	0.11121	ENSRNOG00000053502	Arhgef17	Rho guanine nucleotide exchange factor 17 [Source:RGD Symbol;Acc:1309890]
ENSRNOG00000021442	200.68	0.0311208	0.118615	0.262367	0.793038	0.864466	ENSRNOG00000021442	Hddc2	HD domain containing 2 [Source:RGD Symbol;Acc:1307562]
ENSRNOG00000066023	311.951	0.408278	0.0853373	4.78429	1.71594e-06	1.78124e-05	ENSRNOG00000066023
ENSRNOG00000014278	731.292	-0.485085	0.0844445	-5.74442	9.2237e-09	1.91229e-07	ENSRNOG00000014278	Zfp710	zinc finger protein 710 [Source:RGD Symbol;Acc:1306491]
ENSRNOG00000022921	751.049	-0.0318153	0.100726	-0.315859	0.752109	0.833521	ENSRNOG00000022921	Dact2	dishevelled-binding antagonist of beta-catenin 2 [Source:RGD Symbol;Acc:1310742]
ENSRNOG00000037360	32.5337	0.559339	0.286195	1.9544	0.0506543	0.10851	ENSRNOG00000037360	AABR07003173.1
ENSRNOG00000020624	1891.3	0.235394	0.0556532	4.22965	2.34051e-05	0.00017	ENSRNOG00000020624	Acadsb	acyl-CoA dehydrogenase, short/branched chain [Source:RGD Symbol;Acc:2013]
ENSRNOG00000013981	16499	-0.156569	0.064575	-2.42462	0.0153246	0.0412594	ENSRNOG00000013981	Ptpn5	protein tyrosine phosphatase, non-receptor type 5 [Source:RGD Symbol;Acc:3448]
ENSRNOG00000065346	37.9108	0.596693	0.273983	2.17784	0.0294178	0.0702679	ENSRNOG00000065346
ENSRNOG00000059083	215.874	0.0372706	0.180345	0.206662	0.836274	0.895893	ENSRNOG00000059083	LOC120100370	small nucleolar RNA SNORA44 [Source:RGD Symbol;Acc:41111402]
ENSRNOG00000030818	686.902	0.0534436	0.0651497	0.82032	0.412034	0.548249	ENSRNOG00000030818	C1h11orf42	similar to human chromosome 11 open reading frame 42 [Source:RGD Symbol;Acc:1561034]
ENSRNOG00000064515	1237.46	0.315935	0.0634298	4.98086	6.3302e-07	7.43323e-06	ENSRNOG00000064515
ENSRNOG00000017930	711.761	-0.0872178	0.0659843	-1.3218	0.186236	0.303304	ENSRNOG00000017930	Lpcat1	lysophosphatidylcholine acyltransferase 1 [Source:RGD Symbol;Acc:1311599]
ENSRNOG00000063371	225.088	0.00290721	0.0960002	0.0302834	0.975841	0.986066	ENSRNOG00000063371
ENSRNOG00000068809	221.355	0.142785	0.1053	1.35599	0.175103	0.289345	ENSRNOG00000068809
ENSRNOG00000019869	212.279	-0.422374	0.144185	-2.92939	0.00339625	0.0117844	ENSRNOG00000019869	Lrfn1	leucine rich repeat and fibronectin type III domain containing 1 [Source:RGD Symbol;Acc:1304707]
ENSRNOG00000067318	238.391	-0.192655	0.109016	-1.76722	0.0771908	0.152243	ENSRNOG00000067318
ENSRNOG00000023411	232.868	-0.157804	0.118805	-1.32826	0.184093	0.300896	ENSRNOG00000023411	Vsig10l	V-set and immunoglobulin domain containing 10 like [Source:RGD Symbol;Acc:1564982]
ENSRNOG00000046005	122939	-0.221493	0.0653252	-3.39062	0.000697344	0.00309498	ENSRNOG00000046005	Scd2	stearoyl-Coenzyme A desaturase 2 [Source:RGD Symbol;Acc:621177]
ENSRNOG00000018686	2745.52	-0.37639	0.10511	-3.5809	0.000342413	0.00169821	ENSRNOG00000018686	Atxn2l	ataxin 2-like [Source:RGD Symbol;Acc:1565868]
ENSRNOG00000063261	231.484	0.331513	0.111582	2.97102	0.00296816	0.0105282	ENSRNOG00000063261
ENSRNOG00000058906	28.277	-0.0148796	0.300067	-0.0495876	0.960451	0.976357	ENSRNOG00000058906	Ptprh	protein tyrosine phosphatase, receptor type, H [Source:RGD Symbol;Acc:620553]
ENSRNOG00000069563	30.9512	-0.228979	0.258841	-0.884629	0.376357	0.514616	ENSRNOG00000069563
ENSRNOG00000017408	621.678	-0.382113	0.0778972	-4.90535	9.32617e-07	1.0388e-05	ENSRNOG00000017408	Fhip1b	FHF complex subunit HOOK interacting protein 1B [Source:RGD Symbol;Acc:1359585]
ENSRNOG00000021794	183.085	-0.284875	0.140633	-2.02567	0.042799	0.0947792	ENSRNOG00000021794	Znhit2	zinc finger, HIT-type containing 2 [Source:RGD Symbol;Acc:1307918]
ENSRNOG00000069938	36.4868	0.540763	0.238182	2.27038	0.0231848	0.0579542	ENSRNOG00000069938
ENSRNOG00000013949	1546.85	-0.144803	0.0542947	-2.66699	0.00765341	0.0231211	ENSRNOG00000013949	Idh2	isocitrate dehydrogenase (NADP(+)) 2 [Source:RGD Symbol;Acc:1597139]
ENSRNOG00000065858	123.279	0.645975	0.137467	4.69914	2.61261e-06	2.56255e-05	ENSRNOG00000065858
ENSRNOG00000016103	173.324	-0.253309	0.152426	-1.66185	0.0965424	0.181593	ENSRNOG00000016103	Nkd2	NKD inhibitor of WNT signaling pathway 2 [Source:RGD Symbol;Acc:1311459]
ENSRNOG00000020643	896.636	0.152778	0.0623899	2.44877	0.0143347	0.0390727	ENSRNOG00000020643	Bub3	BUB3 mitotic checkpoint protein [Source:RGD Symbol;Acc:1306654]
ENSRNOG00000018217	75.877	-1.11318	0.238527	-4.6669	3.05778e-06	2.92249e-05	ENSRNOG00000018217	Syt5	synaptotagmin 5 [Source:RGD Symbol;Acc:3806]
ENSRNOG00000058790	2188.88	0.149917	0.0480816	3.11796	0.00182109	0.00695671	ENSRNOG00000058790	Fam120b	family with sequence similarity 120B [Source:RGD Symbol;Acc:1310304]
ENSRNOG00000020371	109.834	-0.157093	0.174185	-0.901875	0.367123	0.505576	ENSRNOG00000020371	Pgap2	post-GPI attachment to proteins 2 [Source:RGD Symbol;Acc:619744]
ENSRNOG00000014996	158.244	0.138112	0.114499	1.20623	0.227728	0.354406	ENSRNOG00000014996	Katna1	katanin catalytic subunit A1 [Source:RGD Symbol;Acc:1303062]
ENSRNOG00000067296	283.472	0.311179	0.0965957	3.22145	0.00127542	0.00512914	ENSRNOG00000067296	LOC108348090	zinc finger protein OZF-like [Source:RGD Symbol;Acc:11436011]
ENSRNOG00000017914	187.096	-0.5829	0.120426	-4.84033	1.29622e-06	1.38202e-05	ENSRNOG00000017914	Cavin3	caveolae associated protein 3 [Source:RGD Symbol;Acc:628755]
ENSRNOG00000014705	25.3639	-0.205979	0.470345	-0.437932	0.661436	0.764844	ENSRNOG00000014705	Rbm20	RNA binding motif protein 20 [Source:RGD Symbol;Acc:1307427]
ENSRNOG00000070027	173.43	-0.304217	0.120884	-2.51662	0.0118488	0.0332987	ENSRNOG00000070027
ENSRNOG00000009932	179.496	0.37478	0.135925	2.75725	0.00582898	0.0184757	ENSRNOG00000009932	Mctp2	multiple C2 and transmembrane domain containing 2 [Source:RGD Symbol;Acc:1562967]
ENSRNOG00000020865	132.42	-0.170144	0.161687	-1.0523	0.292661	0.427926	ENSRNOG00000020865	Ano1	anoctamin 1 [Source:RGD Symbol;Acc:1310786]
ENSRNOG00000020714	84.7597	-0.624014	0.17812	-3.50334	0.000459469	0.00218164	ENSRNOG00000020714	Trpm4	transient receptor potential cation channel, subfamily M, member 4 [Source:RGD Symbol;Acc:620244]
ENSRNOG00000015825	756.475	-0.00117853	0.0855062	-0.013783	0.989003	0.993723	ENSRNOG00000015825	Aurkc	aurora kinase C [Source:RGD Symbol;Acc:1309573]
ENSRNOG00000064970	115.715	0.504536	0.144876	3.48253	0.000496695	0.00232019	ENSRNOG00000064970	Zfp939	zinc finger protein 939 [Source:RGD Symbol;Acc:1584032]
ENSRNOG00000030127	3910.8	-0.198733	0.0793759	-2.5037	0.0122903	0.0342752	ENSRNOG00000030127	Eml2	EMAP like 2 [Source:RGD Symbol;Acc:621066]
ENSRNOG00000027098	4288.21	-0.0158979	0.061218	-0.259693	0.795101	0.865509	ENSRNOG00000027098	Sez6l2	seizure related 6 homolog like 2 [Source:RGD Symbol;Acc:1565281]
ENSRNOG00000017311	1098.42	0.263357	0.0527831	4.98942	6.05619e-07	7.17336e-06	ENSRNOG00000017311	Me3	malic enzyme 3 [Source:RGD Symbol;Acc:1311070]
ENSRNOG00000019270	127.827	-0.538415	0.145387	-3.70333	0.00021279	0.00112554	ENSRNOG00000019270	P2ry6	pyrimidinergic receptor P2Y6 [Source:RGD Symbol;Acc:620269]
ENSRNOG00000066986	127.099	0.0125925	0.144002	0.0874467	0.930316	0.957212	ENSRNOG00000066986	Zfp619	zinc finger protein 619 [Source:RGD Symbol;Acc:7710512]
ENSRNOG00000018762	82.913	0.365282	0.155733	2.34557	0.0189978	0.0493573	ENSRNOG00000018762	Rsph3	radial spoke head 3 [Source:RGD Symbol;Acc:1311306]
ENSRNOG00000015956	2014.95	0.156176	0.0678677	2.30118	0.0213815	0.054245	ENSRNOG00000015956	Usp29	ubiquitin specific peptidase 29 [Source:RGD Symbol;Acc:1306648]
ENSRNOG00000018019	4596.93	0.150078	0.0563361	2.66398	0.00772219	0.0233006	ENSRNOG00000018019	Hspa12a	heat shock protein family A (Hsp70) member 12A [Source:RGD Symbol;Acc:1305531]
ENSRNOG00000046036	52.1936	-0.0194326	0.20994	-0.0925625	0.926251	0.954606	ENSRNOG00000046036	Itprip	inositol 1,4,5-trisphosphate receptor interacting protein [Source:RGD Symbol;Acc:6488464]
ENSRNOG00000016372	197.28	-0.185871	0.121441	-1.53054	0.125883	0.223189	ENSRNOG00000016372	Slc12a7	solute carrier family 12 member 7 [Source:RGD Symbol;Acc:1359672]
ENSRNOG00000064277	54.3383	-0.96729	0.223656	-4.3249	1.52598e-05	0.000116796	ENSRNOG00000064277
ENSRNOG00000068327	626.608	0.0353259	0.0742516	0.475759	0.634246	0.743469	ENSRNOG00000068327	Pdcd5	programmed cell death 5 [Source:RGD Symbol;Acc:1310561]
ENSRNOG00000019812	1044.99	-0.710899	0.121358	-5.85788	4.68812e-09	1.08986e-07	ENSRNOG00000019812	Nr1h2	nuclear receptor subfamily 1, group H, member 2 [Source:RGD Symbol;Acc:61906]
ENSRNOG00000070842	66.3199	-0.0285254	0.194833	-0.146409	0.883598	0.926229	ENSRNOG00000070842
ENSRNOG00000025940	2799.07	0.199128	0.0897481	2.21874	0.0265041	0.0646198	ENSRNOG00000025940	Mettl9	methyltransferase like 9 [Source:RGD Symbol;Acc:2311609]
ENSRNOG00000020393	1828.2	-0.301606	0.0662206	-4.55457	5.24928e-06	4.63749e-05	ENSRNOG00000020393	Rhog	ras homolog family member G [Source:RGD Symbol;Acc:621310]
ENSRNOG00000067076	173.807	-0.286575	0.119131	-2.40555	0.0161482	0.0430197	ENSRNOG00000067076	Frat1	FRAT regulator of WNT signaling pathway 1 [Source:RGD Symbol;Acc:9147096]
ENSRNOG00000014969	869.584	-0.734255	0.137428	-5.34282	9.15119e-08	1.38313e-06	ENSRNOG00000014969	Lzts2	leucine zipper tumor suppressor 2 [Source:RGD Symbol;Acc:1359249]
ENSRNOG00000010840	33.4966	-0.168137	0.250532	-0.671121	0.502144	0.631716	ENSRNOG00000010840	Adamtsl3	ADAMTS-like 3 [Source:RGD Symbol;Acc:1305155]
ENSRNOG00000067278	436.192	0.444027	0.118012	3.76254	0.000168196	0.000917924	ENSRNOG00000067278	LOC108349532	high mobility group protein B1 pseudogene [Source:RGD Symbol;Acc:11382437]
ENSRNOG00000010308	232.827	-0.338951	0.194386	-1.7437	0.0812109	0.158292	ENSRNOG00000010308	Nr2f2	nuclear receptor subfamily 2, group F, member 2 [Source:RGD Symbol;Acc:69305]
ENSRNOG00000017277	28.1469	0.374109	0.343019	1.09064	0.275433	0.408814	ENSRNOG00000017277	Igsf6	immunoglobulin superfamily, member 6 [Source:RGD Symbol;Acc:620663]
ENSRNOG00000017851	152.561	0.179798	0.117799	1.52632	0.126931	0.224487	ENSRNOG00000017851	Etfb	electron transfer flavoprotein subunit beta [Source:RGD Symbol;Acc:1303312]
ENSRNOG00000011439	281.381	-0.199008	0.0915775	-2.17311	0.0297719	0.0708872	ENSRNOG00000011439	Grk5	G protein-coupled receptor kinase 5 [Source:RGD Symbol;Acc:61985]
ENSRNOG00000017635	1456.52	-0.0122143	0.0569926	-0.214314	0.830302	0.891749	ENSRNOG00000017635	Inpp5a	inositol polyphosphate-5-phosphatase A [Source:RGD Symbol;Acc:1306168]
ENSRNOG00000056397	35.5548	0.112357	0.249661	0.450039	0.652682	0.757829	ENSRNOG00000056397	LOC120100233	small nucleolar RNA SNORD22 [Source:RGD Symbol;Acc:40941034]
ENSRNOG00000068081	301.293	0.187411	0.0810432	2.31248	0.0207513	0.0529584	ENSRNOG00000068081
ENSRNOG00000065098	1612.23	0.299516	0.068978	4.3422	1.41064e-05	0.000108916	ENSRNOG00000065098	Hmgb1-ps4	high-mobility group box 1, pseudogene 4 [Source:RGD Symbol;Acc:1596834]
ENSRNOG00000029394	1060.08	-0.408375	0.0795235	-5.13528	2.8172e-07	3.68429e-06	ENSRNOG00000029394	Dusp8	dual specificity phosphatase 8 [Source:RGD Symbol;Acc:1306425]
ENSRNOG00000017884	36.9957	-0.141235	0.23146	-0.610193	0.541734	0.666434	ENSRNOG00000017884	Dnajb6-ps10	DnaJ heat shock protein family (Hsp40) member B6, pseudogene 10 [Source:RGD Symbol;Acc:1583989]
ENSRNOG00000064417	157.539	0.0891346	0.118549	0.751881	0.452123	0.586559	ENSRNOG00000064417
ENSRNOG00000021082	1684.77	-0.0641015	0.0506509	-1.26555	0.205673	0.327796	ENSRNOG00000021082	Kdelr1	KDEL endoplasmic reticulum protein retention receptor 1 [Source:RGD Symbol;Acc:1306764]
ENSRNOG00000066269	84.4511	0.136682	0.147851	0.924457	0.355248	0.49242	ENSRNOG00000066269
ENSRNOG00000020197	151.067	-0.492618	0.144483	-3.40952	0.000650783	0.00292217	ENSRNOG00000020197	Cd248	endosialin [Source:RGD Symbol;Acc:11367424]
ENSRNOG00000016687	202.714	-0.507854	0.169462	-2.99685	0.00272783	0.00981362	ENSRNOG00000016687	Ssc5d	scavenger receptor cysteine rich family member with 5 domains [Source:RGD Symbol;Acc:1565772]
ENSRNOG00000059984	143.452	-0.221084	0.13687	-1.61528	0.10625	0.195738	ENSRNOG00000059984	Dll1	delta like canonical Notch ligand 1 [Source:RGD Symbol;Acc:70949]
ENSRNOG00000020363	1463.84	-0.631062	0.108167	-5.83415	5.40661e-09	1.22452e-07	ENSRNOG00000020363	Med25	mediator complex subunit 25 [Source:RGD Symbol;Acc:1305137]
ENSRNOG00000020871	653.678	-0.765249	0.139609	-5.48136	4.22077e-08	6.98694e-07	ENSRNOG00000020871	Ltbp4	latent transforming growth factor beta binding protein 4 [Source:RGD Symbol;Acc:1307033]
ENSRNOG00000033843	31.1949	0.182136	0.282624	0.644448	0.519285	0.646641	ENSRNOG00000033843	AABR07007121.1
ENSRNOG00000021151	521.124	-0.315016	0.098019	-3.21383	0.00130978	0.00524426	ENSRNOG00000021151	Ppp1r14b	protein phosphatase 1, regulatory (inhibitor) subunit 14B [Source:RGD Symbol;Acc:628702]
ENSRNOG00000018310	119.31	0.0736168	0.156001	0.4719	0.636998	0.745234	ENSRNOG00000018310	Eno4	enolase 4 [Source:RGD Symbol;Acc:1308333]
ENSRNOG00000030404	650.108	-0.288542	0.0961013	-3.00248	0.00267787	0.00966414	ENSRNOG00000030404	Arrb1	arrestin, beta 1 [Source:RGD Symbol;Acc:2156]
ENSRNOG00000067564	559.519	0.359245	0.102057	3.52005	0.000431471	0.00206984	ENSRNOG00000067564
ENSRNOG00000014004	981.276	0.33208	0.0714921	4.64499	3.40087e-06	3.20128e-05	ENSRNOG00000014004	Ncoa7	nuclear receptor coactivator 7 [Source:RGD Symbol;Acc:1566426]
ENSRNOG00000047816	527.004	0.00837403	0.0700528	0.119539	0.904848	0.941047	ENSRNOG00000047816	Ccs	copper chaperone for superoxide dismutase [Source:RGD Symbol;Acc:620403]
ENSRNOG00000018433	242.714	-0.318574	0.121669	-2.61836	0.00883524	0.026173	ENSRNOG00000018433	Hps6	HPS6, biogenesis of lysosomal organelles complex 2 subunit 3 [Source:RGD Symbol;Acc:631341]
ENSRNOG00000020925	423.025	-0.118915	0.0814141	-1.46062	0.144119	0.248018	ENSRNOG00000020925	Ccdc86	coiled-coil domain containing 86 [Source:RGD Symbol;Acc:1359280]
ENSRNOG00000064594	195.934	0.526664	0.132882	3.96341	7.38863e-05	0.000453388	ENSRNOG00000064594
ENSRNOG00000070917	26.5702	0.154188	0.30648	0.503093	0.614899	0.727062	ENSRNOG00000070917	LOC102556098	zinc finger protein 729-like [Source:RGD Symbol;Acc:7732163]
ENSRNOG00000012140	327.622	-0.298495	0.103616	-2.88077	0.00396702	0.0134313	ENSRNOG00000012140	Cep89	centrosomal protein 89 [Source:RGD Symbol;Acc:1311730]
ENSRNOG00000014828	310.84	-0.193202	0.0907312	-2.12938	0.0332224	0.0773534	ENSRNOG00000014828	Avpi1	arginine vasopressin-induced 1 [Source:RGD Symbol;Acc:621721]
ENSRNOG00000020497	2441.22	0.0639608	0.0653282	0.979069	0.327546	0.464365	ENSRNOG00000020497	Plekha1	pleckstrin homology domain containing A1 [Source:RGD Symbol;Acc:1564153]
ENSRNOG00000070030	35.2105	0.283036	0.279995	1.01086	0.312083	0.448085	ENSRNOG00000070030
ENSRNOG00000025154	544.493	0.275784	0.0807859	3.41377	0.000640712	0.00288301	ENSRNOG00000025154	Snu13	NHP2 non-histone chromosome protein 2-like 1-like [Source:RGD Symbol;Acc:2323620]
ENSRNOG00000014448	640.682	0.15369	0.081366	1.88887	0.0589093	0.122404	ENSRNOG00000014448	Bmal1	basic helix-loop-helix ARNT like 1 [Source:RGD Symbol;Acc:62003]
ENSRNOG00000015753	4853.62	-0.747764	0.0974486	-7.67343	1.6746e-14	1.88209e-12	ENSRNOG00000015753	Epn1	Epsin 1 [Source:RGD Symbol;Acc:619772]
ENSRNOG00000067461	51.0155	0.69117	0.214287	3.22543	0.00125782	0.00507199	ENSRNOG00000067461	Rps12l2	ribosomal protein S12-like 2 [Source:RGD Symbol;Acc:2321899]
ENSRNOG00000028781	109.272	-0.676166	0.191438	-3.53204	0.00041237	0.00198906	ENSRNOG00000028781	Abcc6	ATP binding cassette subfamily C member 6 [Source:RGD Symbol;Acc:620268]
ENSRNOG00000064885	95.0555	0.223162	0.152893	1.4596	0.1444	0.248332	ENSRNOG00000064885
ENSRNOG00000054561	33.5432	-0.149131	0.31586	-0.472143	0.636824	0.745205	ENSRNOG00000054561	Isg20	interferon stimulated exonuclease gene 20 [Source:RGD Symbol;Acc:1306407]
ENSRNOG00000065383	45.7857	-0.243012	0.211005	-1.15169	0.24945	0.379217	ENSRNOG00000065383
ENSRNOG00000063169	21.0728	0.186457	0.453977	0.410718	0.681279	0.780371	ENSRNOG00000063169	LOC102548076	zinc finger protein 120-like [Source:RGD Symbol;Acc:7716527]
ENSRNOG00000069489	117.255	0.41528	0.184517	2.25063	0.0244087	0.0605177	ENSRNOG00000069489
ENSRNOG00000019491	1979.72	-0.335279	0.0818296	-4.09728	4.18032e-05	0.000277845	ENSRNOG00000019491	Stard10	StAR-related lipid transfer domain containing 10 [Source:RGD Symbol;Acc:1306548]
ENSRNOG00000019626	21.3966	0.379639	0.337506	1.12484	0.260657	0.392536	ENSRNOG00000019626	Slc27a5	solute carrier family 27 member 5 [Source:RGD Symbol;Acc:708535]
ENSRNOG00000031381	159.646	0.0207154	0.128933	0.160667	0.872355	0.918858	ENSRNOG00000031381	RGD1561333	similar to 60S ribosomal protein L8 [Source:RGD Symbol;Acc:1561333]
ENSRNOG00000021153	2111.67	-0.0461185	0.063484	-0.726459	0.467558	0.599795	ENSRNOG00000021153	Fkbp2	FKBP prolyl isomerase 2 [Source:RGD Symbol;Acc:1560660]
ENSRNOG00000037137	969.072	0.214708	0.0635183	3.38025	0.00072421	0.00319336	ENSRNOG00000037137	Svip	small VCP interacting protein [Source:RGD Symbol;Acc:1565432]
ENSRNOG00000014380	449.415	0.390967	0.0761433	5.13462	2.8271e-07	3.69402e-06	ENSRNOG00000014380	LOC102555672	zinc finger protein 850-like [Source:RGD Symbol;Acc:7701959]
ENSRNOG00000017150	335.683	-0.175786	0.098655	-1.78182	0.0747784	0.148425	ENSRNOG00000017150	Med10	mediator complex subunit 10 [Source:RGD Symbol;Acc:1310128]
ENSRNOG00000020517	46.8175	-0.542496	0.221504	-2.44915	0.0143194	0.0390453	ENSRNOG00000020517	Prrg2	proline rich and Gla domain 2 [Source:RGD Symbol;Acc:1305444]
ENSRNOG00000062805	370.71	0.132588	0.0967269	1.37074	0.170454	0.283348	ENSRNOG00000062805	Or14c39	olfactory receptor family 14 subfamily C member 39 [Source:RGD Symbol;Acc:1333763]
ENSRNOG00000015717	463.013	0.00283084	0.0747345	0.0378786	0.969785	0.982536	ENSRNOG00000015717	Ptpre	protein tyrosine phosphatase, receptor type, E [Source:RGD Symbol;Acc:620771]
ENSRNOG00000015914	3510.53	-0.0498734	0.048611	-1.02597	0.304906	0.440735	ENSRNOG00000015914	U2af2	U2 small nuclear RNA auxiliary factor 2 [Source:RGD Symbol;Acc:1310690]
ENSRNOG00000019141	64.7127	0.176	0.258876	0.679861	0.496593	0.627054	ENSRNOG00000019141	Ch25h	cholesterol 25-hydroxylase [Source:RGD Symbol;Acc:1310575]
ENSRNOG00000067799	258.271	-0.00186202	0.13186	-0.0141212	0.988733	0.993546	ENSRNOG00000067799	Selenow	selenoprotein W [Source:RGD Symbol;Acc:3661]
ENSRNOG00000019582	351.523	0.285772	0.0919582	3.10763	0.00188593	0.00716961	ENSRNOG00000019582	Mthfd1l	methylenetetrahydrofolate dehydrogenase (NADP+ dependent) 1-like [Source:RGD Symbol;Acc:1307311]
ENSRNOG00000019440	35.5412	0.414236	0.301046	1.37599	0.168825	0.281243	ENSRNOG00000019440	Kcnn4	potassium calcium-activated channel subfamily N member 4 [Source:RGD Symbol;Acc:621476]
ENSRNOG00000036711	36.9799	0.635582	0.240643	2.64118	0.00826174	0.0246795	ENSRNOG00000036711	Spn	sialophorin [Source:RGD Symbol;Acc:3750]
ENSRNOG00000013149	404.966	0.023903	0.0752505	0.317645	0.750754	0.83276	ENSRNOG00000013149	Vps33b	VPS33B, late endosome and lysosome associated [Source:RGD Symbol;Acc:620644]
ENSRNOG00000018048	1284.44	0.135051	0.0518888	2.6027	0.00924927	0.0271467	ENSRNOG00000018048	Dctn5	dynactin subunit 5 [Source:RGD Symbol;Acc:1305654]
ENSRNOG00000010224	487.456	0.102984	0.0783969	1.31362	0.188973	0.306973	ENSRNOG00000010224	Rab30	RAB30, member RAS oncogene family [Source:RGD Symbol;Acc:1309507]
ENSRNOG00000063596	28.2034	-0.369762	0.258309	-1.43147	0.152295	0.259197	ENSRNOG00000063596
ENSRNOG00000029043	563.845	0.0868189	0.0783112	1.10864	0.267586	0.400227	ENSRNOG00000029043	Zfp790	zinc finger protein 790 [Source:RGD Symbol;Acc:1309815]
ENSRNOG00000017095	60.5172	0.392592	0.192242	2.04218	0.0411335	0.0918942	ENSRNOG00000017095	Dlat-ps1	dihydrolipoamide S-acetyltransferase, pseudogene 1 [Source:RGD Symbol;Acc:1583609]
ENSRNOG00000018421	163.469	-0.00760261	0.130428	-0.0582896	0.953518	0.971985	ENSRNOG00000018421	Aen	apoptosis enhancing nuclease [Source:RGD Symbol;Acc:1305051]
ENSRNOG00000019681	157.52	-0.712064	0.156892	-4.53855	5.66423e-06	4.9485e-05	ENSRNOG00000019681	Pold1	DNA polymerase delta 1, catalytic subunit [Source:RGD Symbol;Acc:621839]
ENSRNOG00000020202	3899.85	-0.29151	0.0530694	-5.49301	3.95152e-08	6.57765e-07	ENSRNOG00000020202	Asrgl1	asparaginase and isoaspartyl peptidase 1 [Source:RGD Symbol;Acc:708526]
ENSRNOG00000017613	812.551	0.0369005	0.0596822	0.618284	0.536388	0.661437	ENSRNOG00000017613	Tent4a	terminal nucleotidyltransferase 4A [Source:RGD Symbol;Acc:1307356]
ENSRNOG00000055519	99.8265	-0.0448109	0.156435	-0.286451	0.774533	0.850739	ENSRNOG00000055519	Zfp790	zinc finger protein 790 [Source:RGD Symbol;Acc:1309815]
ENSRNOG00000011234	26.633	-0.0621623	0.291155	-0.213503	0.830935	0.8923	ENSRNOG00000011234	Taf5l-ps1	TATA-box binding protein associated factor 5 like, pseudogene 1 [Source:RGD Symbol;Acc:1582831]
ENSRNOG00000015997	889.858	-0.33123	0.090615	-3.65535	0.000256828	0.00132748	ENSRNOG00000015997	Ccdc106	coiled-coil domain containing 106 [Source:RGD Symbol;Acc:1566222]
ENSRNOG00000064983	39.6999	0.320551	0.2609	1.22864	0.219208	0.344085	ENSRNOG00000064983
ENSRNOG00000015773	33.12	0.360608	0.280064	1.28759	0.197888	0.317829	ENSRNOG00000015773	Il21r	interleukin 21 receptor [Source:RGD Symbol;Acc:1304950]
ENSRNOG00000055020	106.429	0.151463	0.156752	0.96626	0.333914	0.470217	ENSRNOG00000055020	LOC679731	hypothetical protein LOC679731 [Source:RGD Symbol;Acc:1584810]
ENSRNOG00000066969	105.252	-0.0485492	0.15284	-0.317647	0.750753	0.83276	ENSRNOG00000066969	Zfp790	zinc finger protein 420-like [Source:RGD Symbol;Acc:150344952]
ENSRNOG00000014251	613.534	-0.266948	0.0916096	-2.91397	0.00356863	0.0122686	ENSRNOG00000014251	Capn5	calpain 5 [Source:RGD Symbol;Acc:620084]
ENSRNOG00000066794	244.763	-0.0594	0.106021	-0.560267	0.575297	0.693847	ENSRNOG00000066794
ENSRNOG00000025539	910.732	0.224637	0.0690767	3.252	0.00114596	0.00468029	ENSRNOG00000025539	Vps13a	vacuolar protein sorting 13 homolog A [Source:RGD Symbol;Acc:1311340]
ENSRNOG00000012716	1049.67	-0.126784	0.080928	-1.56662	0.117203	0.211359	ENSRNOG00000012716	Chd2	chromodomain helicase DNA binding protein 2 [Source:RGD Symbol;Acc:1310056]
ENSRNOG00000063182	251.687	0.0932185	0.104948	0.888232	0.374416	0.512726	ENSRNOG00000063182
ENSRNOG00000016011	277.765	-0.403435	0.0945642	-4.26626	1.98778e-05	0.000147023	ENSRNOG00000016011	Plekhg1	pleckstrin homology and RhoGEF domain containing G1 [Source:RGD Symbol;Acc:1583676]
ENSRNOG00000020014	1666.43	-0.848516	0.108004	-7.85635	3.95477e-15	5.42348e-13	ENSRNOG00000020014	Myh14	myosin heavy chain 14 [Source:RGD Symbol;Acc:1306821]
ENSRNOG00000055082	2191.92	-0.327099	0.0632277	-5.17335	2.29937e-07	3.09369e-06	ENSRNOG00000055082	Maz	MYC associated zinc finger protein [Source:RGD Symbol;Acc:1594632]
ENSRNOG00000019129	36.2989	-0.0247162	0.28184	-0.087696	0.930118	0.957074	ENSRNOG00000019129	Fcgbp	Fc gamma binding protein [Source:RGD Symbol;Acc:2313189]
ENSRNOG00000017960	799.439	-0.256491	0.0967279	-2.65168	0.0080093	0.0240456	ENSRNOG00000017960	Deaf1	DEAF1 transcription factor [Source:RGD Symbol;Acc:620671]
ENSRNOG00000056062	95.5608	0.135705	0.157017	0.86427	0.38744	0.524825	ENSRNOG00000056062	LOC100912787	zinc finger protein 850-like [Source:RGD Symbol;Acc:6485475]
ENSRNOG00000046683	28.5296	0.694485	0.2626	2.64465	0.00817755	0.0244574	ENSRNOG00000046683	Lilrb3	leukocyte immunoglobulin like receptor B3 [Source:RGD Symbol;Acc:1566307]
ENSRNOG00000052256	2764.58	-0.394967	0.0583352	-6.77065	1.28206e-11	6.51844e-10	ENSRNOG00000052256	Dact3	dishevelled-binding antagonist of beta-catenin 3 [Source:RGD Symbol;Acc:1563892]
ENSRNOG00000011931	3439.69	0.0860823	0.0619683	1.38913	0.164792	0.275908	ENSRNOG00000011931	Smarca2	SWI/SNF related, matrix associated, actin dependent regulator of chromatin, subfamily a, member 2 [Source:RGD Symbol;Acc:1302988]
ENSRNOG00000037556	372.188	0.0194502	0.0744657	0.261196	0.793941	0.864876	ENSRNOG00000037556	Zfp420	zinc finger protein 420 [Source:RGD Symbol;Acc:2323829]
ENSRNOG00000068138	44.7343	0.162141	0.279351	0.58042	0.561631	0.682626	ENSRNOG00000068138	Aldh3b2	aldehyde dehydrogenase 3 family, member B2 [Source:RGD Symbol;Acc:1584166]
ENSRNOG00000012301	187.603	-0.0487566	0.117892	-0.413572	0.679188	0.778837	ENSRNOG00000012301	Cfap161	cilia and flagella associated protein 161 [Source:RGD Symbol;Acc:1310371]
ENSRNOG00000070848	277.75	0.296887	0.104592	2.83852	0.0045323	0.0149634	ENSRNOG00000070848	Zfp27	zinc finger protein 27 [Source:RGD Symbol;Acc:2318958]
ENSRNOG00000013160	1499.16	-0.358355	0.0853861	-4.19688	2.70622e-05	0.000192265	ENSRNOG00000013160	Sash1	SAM and SH3 domain containing 1 [Source:RGD Symbol;Acc:1566017]
ENSRNOG00000024077	38.1815	0.221137	0.26433	0.836594	0.402821	0.539114	ENSRNOG00000024077	Fbxo5	F-box protein 5 [Source:RGD Symbol;Acc:1309405]
ENSRNOG00000069496	50.5331	0.033192	0.210091	0.157989	0.874466	0.920355	ENSRNOG00000069496
ENSRNOG00000020456	568.343	0.317455	0.078214	4.0588	4.93259e-05	0.000321554	ENSRNOG00000020456	Nucb2	nucleobindin 2 [Source:RGD Symbol;Acc:620888]
ENSRNOG00000019802	377.746	-0.394688	0.152567	-2.58699	0.00968186	0.0281729	ENSRNOG00000019802	Zfp428	zinc finger protein 428 [Source:RGD Symbol;Acc:1564862]
ENSRNOG00000065781	71.4502	-0.0273356	1.05895	-0.0258139	0.979406	0.988223	ENSRNOG00000065781
ENSRNOG00000062668	27.0544	0.184683	0.281157	0.65687	0.511264	0.639583	ENSRNOG00000062668
ENSRNOG00000012806	1501.18	0.0024063	0.0495668	0.0485466	0.961281	0.976767	ENSRNOG00000012806	Rbbp6	RB binding protein 6, ubiquitin ligase [Source:RGD Symbol;Acc:1311964]
ENSRNOG00000019497	1513.24	0.0868098	0.0530936	1.63504	0.102042	0.189645	ENSRNOG00000019497	Mrpl17	mitochondrial ribosomal protein L17 [Source:RGD Symbol;Acc:70943]
ENSRNOG00000045545	40.3573	0.159161	0.217491	0.731807	0.464286	0.597259	ENSRNOG00000045545	Eid2b	EP300 interacting inhibitor of differentiation 2B [Source:RGD Symbol;Acc:9381183]
ENSRNOG00000064214	1323.64	0.565299	0.0924349	6.11564	9.61706e-10	2.81874e-08	ENSRNOG00000064214
ENSRNOG00000037331	290.081	0.0572594	0.0996862	0.574396	0.5657	0.686036	ENSRNOG00000037331	Cd33	CD33 molecule [Source:RGD Symbol;Acc:1596020]
ENSRNOG00000062784	47.9528	-0.580357	0.216539	-2.68015	0.00735883	0.0223713	ENSRNOG00000062784
ENSRNOG00000020774	477.911	0.371383	0.0859147	4.32269	1.54137e-05	0.000117914	ENSRNOG00000020774	Zfp420	zinc finger protein 383-like [Source:RGD Symbol;Acc:9160828]
ENSRNOG00000037897	6678.98	-0.0801913	0.0641304	-1.25044	0.211138	0.334367	ENSRNOG00000037897	Rps19	ribosomal protein S19 [Source:RGD Symbol;Acc:68440]
ENSRNOG00000016831	1006.55	-0.815425	0.0764662	-10.6639	1.50228e-26	2.93133e-23	ENSRNOG00000016831	Serpinh1	serpin family H member 1 [Source:RGD Symbol;Acc:69302]
ENSRNOG00000024280	100.733	-0.064263	0.15561	-0.412974	0.679625	0.779187	ENSRNOG00000024280	Ccdc170	coiled-coil domain containing 170 [Source:RGD Symbol;Acc:1310945]
ENSRNOG00000055683	27.5111	0.81859	0.292667	2.797	0.00515799	0.0166851	ENSRNOG00000055683	Cct7-ps1	chaperonin containing Tcp1, subunit 7 (eta), pseudogene 1 [Source:RGD Symbol;Acc:1562884]
ENSRNOG00000056228	493.176	-0.0237841	0.0901818	-0.263735	0.791984	0.863814	ENSRNOG00000056228	Atp10a	ATPase phospholipid transporting 10A (putative) [Source:RGD Symbol;Acc:1306150]
ENSRNOG00000028743	689.788	-0.456706	0.0996277	-4.58413	4.55883e-06	4.1101e-05	ENSRNOG00000028743	Gal3st3	galactose-3-O-sulfotransferase 3 [Source:RGD Symbol;Acc:1564991]
ENSRNOG00000028273	581.462	-0.216774	0.0737029	-2.94118	0.00326959	0.0114191	ENSRNOG00000028273	Tmem150b	transmembrane protein 150B [Source:RGD Symbol;Acc:1306181]
ENSRNOG00000023233	173.249	0.122916	0.111962	1.09784	0.272275	0.405173	ENSRNOG00000023233	Zfp658	zinc finger protein 658 [Source:RGD Symbol;Acc:7541917]
ENSRNOG00000034075	597.989	0.160081	0.0836363	1.91401	0.0556191	0.11716	ENSRNOG00000034075	Ube2ql1	ubiquitin-conjugating enzyme E2Q family-like 1 [Source:RGD Symbol;Acc:1598121]
ENSRNOG00000014341	1082.1	0.305572	0.0734748	4.15887	3.19828e-05	0.000222362	ENSRNOG00000014341	Btbd10	BTB domain containing 10 [Source:RGD Symbol;Acc:1306301]
ENSRNOG00000069950	78.0127	-0.31611	0.202431	-1.56157	0.118389	0.212727	ENSRNOG00000069950
ENSRNOG00000020543	584.699	-0.247552	0.11066	-2.23704	0.0252838	0.0622026	ENSRNOG00000020543	Nosip	nitric oxide synthase interacting protein [Source:RGD Symbol;Acc:1309992]
ENSRNOG00000020298	437.321	-0.418673	0.11595	-3.61079	0.000305262	0.00154105	ENSRNOG00000020298	Bag3	BAG cochaperone 3 [Source:RGD Symbol;Acc:1307794]
ENSRNOG00000018255	4761.34	-0.0985109	0.0504885	-1.95116	0.0510385	0.109239	ENSRNOG00000018255	Clptm1	CLPTM1 regulator of GABA type A receptor forward trafficking [Source:RGD Symbol;Acc:1310959]
ENSRNOG00000066399	824.941	-0.163034	0.0703194	-2.31848	0.0204231	0.0522837	ENSRNOG00000066399
ENSRNOG00000021000	95.0056	-0.335	0.184521	-1.81551	0.0694458	0.139639	ENSRNOG00000021000	Naaladl1	N-acetylated alpha-linked acidic dipeptidase-like 1 [Source:RGD Symbol;Acc:620987]
ENSRNOG00000062327	714.468	0.0763754	0.0859335	0.888774	0.374125	0.512548	ENSRNOG00000062327
ENSRNOG00000033729	245.889	0.297999	0.10432	2.85657	0.00428245	0.0143336	ENSRNOG00000033729	LOC102556967	zinc finger protein 484-like [Source:RGD Symbol;Acc:7510716]
ENSRNOG00000020716	1411.57	-0.395638	0.0616185	-6.42076	1.35598e-10	5.11847e-09	ENSRNOG00000020716	Axl	Axl receptor tyrosine kinase [Source:RGD Symbol;Acc:620028]
ENSRNOG00000011488	389.841	-0.0225294	0.083248	-0.270629	0.786676	0.860222	ENSRNOG00000011488	Sergef	secretion regulating guanine nucleotide exchange factor [Source:RGD Symbol;Acc:1563497]
ENSRNOG00000015441	258.267	-0.0659405	0.126408	-0.521647	0.601916	0.716072	ENSRNOG00000015441	Il4r	interleukin 4 receptor [Source:RGD Symbol;Acc:2899]
ENSRNOG00000047057	61.4656	-0.4074	0.190391	-2.1398	0.0323707	0.0758072	ENSRNOG00000047057	Gpr26	G protein-coupled receptor 26 [Source:RGD Symbol;Acc:619843]
ENSRNOG00000020412	4037.67	-0.0241914	0.0419379	-0.57684	0.564047	0.684768	ENSRNOG00000020412	Sf3b2	splicing factor 3b, subunit 2 [Source:RGD Symbol;Acc:1307159]
ENSRNOG00000016923	2165.8	0.0651833	0.0426557	1.52813	0.126481	0.223982	ENSRNOG00000016923	Clptm1l	CLPTM1-like [Source:RGD Symbol;Acc:1307896]
ENSRNOG00000010938	1035.72	-0.523276	0.0851525	-6.14516	7.98806e-10	2.3977e-08	ENSRNOG00000010938	Slc7a10	solute carrier family 7 member 10 [Source:RGD Symbol;Acc:621672]
ENSRNOG00000065260	377.348	0.303805	0.0960202	3.16397	0.00155634	0.00609884	ENSRNOG00000065260
ENSRNOG00000011029	662.589	0.1887	0.0725484	2.60103	0.00929454	0.0272475	ENSRNOG00000011029	Sec11a	SEC11 homolog A, signal peptidase complex subunit [Source:RGD Symbol;Acc:69360]
ENSRNOG00000015239	426.552	0.372958	0.100523	3.71017	0.000207117	0.00109982	ENSRNOG00000015239	Ginm1	glycosylated integral membrane protein 1 [Source:RGD Symbol;Acc:1309759]
ENSRNOG00000069539	254.095	-0.0711972	0.106485	-0.668615	0.503741	0.632925	ENSRNOG00000069539	Zfp74	zinc finger protein 74 [Source:RGD Symbol;Acc:1563223]
ENSRNOG00000018426	432.234	-0.231397	0.106004	-2.18291	0.0290426	0.069473	ENSRNOG00000018426	Apoc1	apolipoprotein C1 [Source:RGD Symbol;Acc:2134]
ENSRNOG00000020110	1686.42	0.202514	0.0581323	3.48366	0.000494601	0.00231301	ENSRNOG00000020110	B4gat1	beta-1,4-glucuronyltransferase 1 [Source:RGD Symbol;Acc:1309541]
ENSRNOG00000012084	1372.13	-0.101085	0.0540861	-1.86896	0.0616286	0.127048	ENSRNOG00000012084	Xpnpep1	X-prolyl aminopeptidase 1 [Source:RGD Symbol;Acc:621274]
ENSRNOG00000046652	104.941	-0.112863	0.139526	-0.808903	0.418571	0.554583	ENSRNOG00000046652	Zfp790	zinc finger protein 30 homolog [Source:RGD Symbol;Acc:11363847]
ENSRNOG00000013770	932.413	0.00217991	0.084546	0.0257837	0.97943	0.988223	ENSRNOG00000013770	Folh1	folate hydrolase 1 [Source:RGD Symbol;Acc:70963]
ENSRNOG00000024961	491.83	-0.083418	0.0855278	-0.975333	0.329395	0.46596	ENSRNOG00000024961	Usp35	ubiquitin specific peptidase 35 [Source:RGD Symbol;Acc:1565984]
ENSRNOG00000017673	7652.61	-0.608684	0.0768624	-7.91914	2.39154e-15	3.53627e-13	ENSRNOG00000017673	Brsk1	BR serine/threonine kinase 1 [Source:RGD Symbol;Acc:1563268]
ENSRNOG00000032150	1928.7	0.098444	0.0571936	1.72124	0.0852074	0.164473	ENSRNOG00000032150	Adcy2	adenylate cyclase 2 [Source:RGD Symbol;Acc:619965]
ENSRNOG00000018356	1292.81	-0.159168	0.0750246	-2.12155	0.0338758	0.0784956	ENSRNOG00000018356	Trim3	tripartite motif-containing 3 [Source:RGD Symbol;Acc:70074]
ENSRNOG00000023753	1779.59	0.0698399	0.0565841	1.23427	0.217104	0.341427	ENSRNOG00000023753	Afdn	afadin, adherens junction formation factor [Source:RGD Symbol;Acc:708561]
ENSRNOG00000030932	531.232	-0.0688018	0.0732463	-0.939321	0.347566	0.48424	ENSRNOG00000030932	Zfp14	ZFP14 zinc finger protein [Source:RGD Symbol;Acc:1560188]
ENSRNOG00000018761	3481.65	-0.2729	0.0852312	-3.20188	0.00136535	0.00543811	ENSRNOG00000018761	Eif3c	eukaryotic translation initiation factor 3, subunit C [Source:RGD Symbol;Acc:1308871]
ENSRNOG00000030160	30.8124	-0.183092	0.253323	-0.722762	0.469826	0.601899	ENSRNOG00000030160	Zfp819	zinc finger protein 819 [Source:RGD Symbol;Acc:1309564]
ENSRNOG00000069633	123.823	-0.0407929	0.144353	-0.28259	0.777491	0.852688	ENSRNOG00000069633	Itpripl2	ITPRIP like 2 [Source:RGD Symbol;Acc:1564255]
ENSRNOG00000032946	204.614	-0.534292	0.165053	-3.23709	0.00120755	0.0049037	ENSRNOG00000032946	Pdzd7	PDZ domain containing 7 [Source:RGD Symbol;Acc:1309882]
ENSRNOG00000020743	161.016	0.354425	0.13717	2.58383	0.00977092	0.0283769	ENSRNOG00000020743	Cyp2s1	cytochrome P450, family 2, subfamily s, polypeptide 1 [Source:RGD Symbol;Acc:1306078]
ENSRNOG00000012362	1789.2	0.05417	0.0550386	0.984219	0.325008	0.461808	ENSRNOG00000012362	Cacng3	calcium voltage-gated channel auxiliary subunit gamma 3 [Source:RGD Symbol;Acc:628803]
ENSRNOG00000014303	4985.39	0.151787	0.0513719	2.95466	0.00313011	0.011004	ENSRNOG00000014303	Lrp11	LDL receptor related protein 11 [Source:RGD Symbol;Acc:1308602]
ENSRNOG00000018454	59762.7	-0.696851	0.144122	-4.83514	1.33051e-06	1.41253e-05	ENSRNOG00000018454	Apoe	apolipoprotein E [Source:RGD Symbol;Acc:2138]
ENSRNOG00000052023	27.8639	0.206883	0.276002	0.749571	0.453513	0.587649	ENSRNOG00000052023	LOC102547241	zinc finger protein 82 [Source:RGD Symbol;Acc:6499485]
ENSRNOG00000020531	593.667	0.175787	0.0794129	2.21358	0.0268579	0.0653332	ENSRNOG00000020531	Fen1	flap structure-specific endonuclease 1 [Source:RGD Symbol;Acc:621821]
ENSRNOG00000019544	220.497	-0.0320674	0.0978944	-0.327571	0.743236	0.827614	ENSRNOG00000019544	Zbtb2	zinc finger and BTB domain containing 2 [Source:RGD Symbol;Acc:1306621]
ENSRNOG00000020477	58.4839	0.0987779	0.222916	0.443116	0.657682	0.761859	ENSRNOG00000020477	LOC100911093	CCA tRNA nucleotidyltransferase 1, mitochondrial-like [Source:RGD Symbol;Acc:6494996]
ENSRNOG00000023549	203.819	-0.257377	0.137155	-1.87655	0.0605803	0.125301	ENSRNOG00000023549	Samd5	sterile alpha motif domain containing 5 [Source:RGD Symbol;Acc:1311012]
ENSRNOG00000021096	421.784	-0.046499	0.100674	-0.461878	0.644169	0.750958	ENSRNOG00000021096	Tmem143	transmembrane protein 143 [Source:RGD Symbol;Acc:1305013]
ENSRNOG00000022796	151.703	0.0438962	0.151876	0.289026	0.772561	0.849136	ENSRNOG00000022796	Fgfbp3	fibroblast growth factor binding protein 3 [Source:RGD Symbol;Acc:1560326]
ENSRNOG00000029784	3497.28	0.19296	0.0473154	4.07815	4.53947e-05	0.00029853	ENSRNOG00000029784	Pak1	p21 (RAC1) activated kinase 1 [Source:RGD Symbol;Acc:3250]
ENSRNOG00000018885	715.172	0.216705	0.0747139	2.90046	0.00372615	0.012734	ENSRNOG00000018885	Zfp780b	zinc finger protein 780B [Source:RGD Symbol;Acc:1592570]
ENSRNOG00000063852	953.921	0.0513078	0.0563536	0.910461	0.362579	0.500539	ENSRNOG00000063852	Tmem80	transmembrane protein 80 [Source:RGD Symbol;Acc:1308399]
ENSRNOG00000048138	298.058	-0.144778	0.12662	-1.14341	0.252869	0.383473	ENSRNOG00000048138	Zfp566	zinc finger protein 566 [Source:RGD Symbol;Acc:1563239]
ENSRNOG00000019306	718.961	-0.330484	0.0759166	-4.35326	1.34129e-05	0.000104262	ENSRNOG00000019306	Syt12	synaptotagmin 12 [Source:RGD Symbol;Acc:621876]
ENSRNOG00000018440	1753.76	-0.0584311	0.0667249	-0.875702	0.381192	0.51928	ENSRNOG00000018440	Arfip2	ADP-ribosylation factor interacting protein 2 [Source:RGD Symbol;Acc:1303204]
ENSRNOG00000029082	579.649	-0.178928	0.0897803	-1.99295	0.0462669	0.100877	ENSRNOG00000029082	RGD1566189	similar to ferritin light chain [Source:RGD Symbol;Acc:1566189]
ENSRNOG00000021104	61.0478	0.0902435	0.227089	0.397392	0.691078	0.788256	ENSRNOG00000021104	Emp3	epithelial membrane protein 3 [Source:RGD Symbol;Acc:621094]
ENSRNOG00000011451	952.038	-0.362105	0.0868925	-4.16727	3.08269e-05	0.000215428	ENSRNOG00000011451	Lrp3	LDL receptor related protein 3 [Source:RGD Symbol;Acc:619729]
ENSRNOG00000017254	1130.89	0.0474876	0.0515706	0.920827	0.357141	0.494721	ENSRNOG00000017254	Nsun2	NOP2/Sun RNA methyltransferase 2 [Source:RGD Symbol;Acc:1311954]
ENSRNOG00000020117	1056.51	0.199466	0.0589826	3.38178	0.00072018	0.00317845	ENSRNOG00000020117	Brms1	BRMS1, transcriptional repressor and anoikis regulator [Source:RGD Symbol;Acc:1311057]
ENSRNOG00000050995	159.595	0.0551097	0.113481	0.485629	0.62723	0.737717	ENSRNOG00000050995	Zfp780b	zinc finger protein 780B [Source:RGD Symbol;Acc:1592570]
ENSRNOG00000015503	599.972	-0.587752	0.118083	-4.97744	6.44302e-07	7.55967e-06	ENSRNOG00000015503	Otud7a	OTU deubiquitinase 7A [Source:RGD Symbol;Acc:1563721]
ENSRNOG00000021003	177.876	-0.329034	0.144364	-2.2792	0.0226552	0.0569064	ENSRNOG00000021003	Sac3d1	SAC3 domain containing 1 [Source:RGD Symbol;Acc:1308049]
ENSRNOG00000020274	118.61	0.131677	0.142026	0.927133	0.353857	0.490856	ENSRNOG00000020274	Taf5	TATA-box binding protein associated factor 5 [Source:RGD Symbol;Acc:1311332]
ENSRNOG00000065528	72.4529	0.180501	0.193484	0.932897	0.350873	0.487792	ENSRNOG00000065528	St8sia2	ST8 alpha-N-acetyl-neuraminide alpha-2,8-sialyltransferase 2 [Source:RGD Symbol;Acc:621843]
ENSRNOG00000022701	32.3189	0.00212683	0.26636	0.00798478	0.993629	0.99631	ENSRNOG00000022701	Ceacam18	CEA cell adhesion molecule 18 [Source:RGD Symbol;Acc:1563539]
ENSRNOG00000058039	473.429	-0.230122	0.137672	-1.67153	0.0946168	0.178888	ENSRNOG00000058039	Acta2	actin alpha 2, smooth muscle [Source:RGD Symbol;Acc:621676]
ENSRNOG00000018556	1012.87	-0.300061	0.10273	-2.92087	0.00349059	0.0120558	ENSRNOG00000018556	Tomm40	translocase of outer mitochondrial membrane 40 [Source:RGD Symbol;Acc:1303022]
ENSRNOG00000042741	61.6158	-0.331909	0.206354	-1.60845	0.107738	0.197992	ENSRNOG00000042741	Adgb	androglobin [Source:RGD Symbol;Acc:1564259]
ENSRNOG00000028137	209.639	-0.36278	0.151364	-2.39675	0.0165414	0.0438795	ENSRNOG00000028137	Mki67	marker of proliferation Ki-67 [Source:RGD Symbol;Acc:1305476]
ENSRNOG00000051102	108.238	-0.246421	0.170127	-1.44845	0.14749	0.252541	ENSRNOG00000051102	AABR07004269.3
ENSRNOG00000020296	2830.38	0.275565	0.0616547	4.46948	7.84106e-06	6.5297e-05	ENSRNOG00000020296	Atp5mk	ATP synthase membrane subunit K [Source:RGD Symbol;Acc:631426]
ENSRNOG00000022640	24.9111	-0.141674	0.319358	-0.443621	0.657317	0.761495	ENSRNOG00000022640	Siglec8	sialic acid binding Ig-like lectin 8 [Source:RGD Symbol;Acc:1563073]
ENSRNOG00000029805	289.92	0.205722	0.111372	1.84716	0.0647239	0.132151	ENSRNOG00000029805	Zfp780b	zinc finger protein 780B [Source:RGD Symbol;Acc:1592570]
ENSRNOG00000017601	837.232	0.061593	0.072236	0.852664	0.393846	0.530618	ENSRNOG00000017601	Srd5a1	steroid 5 alpha-reductase 1 [Source:RGD Symbol;Acc:3757]
ENSRNOG00000016090	1050.36	0.0108223	0.0515071	0.210112	0.83358	0.894305	ENSRNOG00000016090	Mtmr10	myotubularin related protein 10 [Source:RGD Symbol;Acc:1305958]
ENSRNOG00000045560	29.7289	0.693364	0.308616	2.24669	0.0246597	0.0609883	ENSRNOG00000045560	Gvin1	GTPase, very large interferon inducible 1 [Source:RGD Symbol;Acc:1598220]
ENSRNOG00000020651	828.485	-0.110755	0.0670125	-1.65275	0.0983818	0.184241	ENSRNOG00000020651	Cars1	cysteinyl-tRNA synthetase 1 [Source:RGD Symbol;Acc:1310747]
ENSRNOG00000065330	292.645	0.179515	0.125023	1.43585	0.151044	0.257387	ENSRNOG00000065330	Mrgpre	MAS related GPR family member E [Source:RGD Symbol;Acc:738045]
ENSRNOG00000016679	408.694	0.174841	0.0980434	1.7833	0.0745367	0.148004	ENSRNOG00000016679	Tmc7	transmembrane channel-like 7 [Source:RGD Symbol;Acc:1564267]
ENSRNOG00000018350	1186.79	0.357596	0.0574334	6.22628	4.77646e-10	1.54877e-08	ENSRNOG00000018350	Shtn1	shootin 1 [Source:RGD Symbol;Acc:1311558]
ENSRNOG00000028992	99.6863	-0.907513	0.213015	-4.26032	2.0413e-05	0.000150312	ENSRNOG00000028992	Acan	aggrecan [Source:RGD Symbol;Acc:68358]
ENSRNOG00000019838	74.8643	-0.0536563	0.208103	-0.257835	0.796534	0.86669	ENSRNOG00000019838	Gmfg	glia maturation factor, gamma [Source:RGD Symbol;Acc:620506]
ENSRNOG00000019549	695.737	-0.0172186	0.08857	-0.194407	0.845857	0.901754	ENSRNOG00000019549	Akap12	A-kinase anchoring protein 12 [Source:RGD Symbol;Acc:70988]
ENSRNOG00000011151	513.627	-0.496517	0.106993	-4.64066	3.47294e-06	3.25681e-05	ENSRNOG00000011151	Tenm4	teneurin transmembrane protein 4 [Source:RGD Symbol;Acc:1304658]
ENSRNOG00000022189	211.637	0.244629	0.108892	2.24651	0.0246711	0.0610064	ENSRNOG00000022189	Htatip2	HIV-1 Tat interactive protein 2 [Source:RGD Symbol;Acc:1309941]
ENSRNOG00000020762	1416.62	0.0656175	0.0778454	0.84292	0.399273	0.535661	ENSRNOG00000020762	Zfp260	zinc finger protein 260 [Source:RGD Symbol;Acc:621205]
ENSRNOG00000023318	80.223	0.322914	0.193059	1.67262	0.0944023	0.178623	ENSRNOG00000023318	Tigd3	tigger transposable element derived 3 [Source:RGD Symbol;Acc:1305393]
ENSRNOG00000066701	100.545	0.0133055	0.158	0.0842123	0.932888	0.958867	ENSRNOG00000066701	LOC691427	similar to 6.8 kDa mitochondrial proteolipid [Source:RGD Symbol;Acc:1583946]
ENSRNOG00000053075	718.702	-0.263723	0.103296	-2.55308	0.0106774	0.0305231	ENSRNOG00000053075	B4galnt4	beta-1,4-N-acetyl-galactosaminyl transferase 4 [Source:RGD Symbol;Acc:1310052]
ENSRNOG00000012874	1726.57	-0.499138	0.0851521	-5.86172	4.58092e-09	1.06683e-07	ENSRNOG00000012874	Rgma	repulsive guidance molecule BMP co-receptor a [Source:RGD Symbol;Acc:1311983]
ENSRNOG00000056069	34.7621	-0.11587	0.278515	-0.416028	0.677389	0.777458	ENSRNOG00000056069	Kif11	kinesin family member 11 [Source:RGD Symbol;Acc:621258]
ENSRNOG00000065214	250.176	0.160324	0.121217	1.32262	0.185963	0.30294	ENSRNOG00000065214	LOC120097335	high mobility group nucleosome-binding domain-containing protein 5-like [Source:RGD Symbol;Acc:41304028]
ENSRNOG00000011895	221.32	0.022249	0.114532	0.194261	0.845972	0.901754	ENSRNOG00000011895	Saal1	serum amyloid A-like 1 [Source:RGD Symbol;Acc:1587443]
ENSRNOG00000017659	52.4952	-0.717534	0.236027	-3.04005	0.00236541	0.00869818	ENSRNOG00000017659	Hs3st2	heparan sulfate-glucosamine 3-sulfotransferase 2 [Source:RGD Symbol;Acc:727787]
ENSRNOG00000020777	575.336	0.0716023	0.0767566	0.932848	0.350898	0.487792	ENSRNOG00000020777	Zfp382	zinc finger protein 382 [Source:RGD Symbol;Acc:708385]
ENSRNOG00000016266	344.881	0.0903032	0.0940229	0.960439	0.336834	0.472903	ENSRNOG00000016266	Mphosph10	M-phase phosphoprotein 10 [Source:RGD Symbol;Acc:1307633]
ENSRNOG00000017839	445.29	-0.0763813	0.113022	-0.675808	0.499163	0.628945	ENSRNOG00000017839	Ercc1	ERCC excision repair 1, endonuclease non-catalytic subunit [Source:RGD Symbol;Acc:1306992]
ENSRNOG00000017918	365.727	-0.212318	0.132175	-1.60634	0.108198	0.198752	ENSRNOG00000017918	Iglon5	IgLON family member 5 [Source:RGD Symbol;Acc:1305344]
ENSRNOG00000016381	225.085	-0.0281767	0.120756	-0.233336	0.8155	0.881552	ENSRNOG00000016381	Ust	uronyl-2-sulfotransferase [Source:RGD Symbol;Acc:1304743]
ENSRNOG00000020736	218.188	-0.184006	0.140549	-1.3092	0.190468	0.308798	ENSRNOG00000020736	Nadsyn1	NAD synthetase 1 [Source:RGD Symbol;Acc:727801]
ENSRNOG00000023985	309.323	0.075792	0.10207	0.742552	0.457753	0.591404	ENSRNOG00000023985	Fan1	FANCD2 and FANCI associated nuclease 1 [Source:RGD Symbol;Acc:1566323]
ENSRNOG00000019376	421.285	0.170434	0.0840686	2.02732	0.0426293	0.0944594	ENSRNOG00000019376	Zfp329	zinc finger protein 329 [Source:RGD Symbol;Acc:1565029]
ENSRNOG00000017456	254.05	-0.434583	0.109466	-3.97001	7.18698e-05	0.000442759	ENSRNOG00000017456	Vstm2b	V-set and transmembrane domain containing 2B [Source:RGD Symbol;Acc:1306235]
ENSRNOG00000008815	329.77	-0.0904016	0.0999021	-0.904902	0.365517	0.50385	ENSRNOG00000008815	Fbxo46	F-box protein 46 [Source:RGD Symbol;Acc:1308393]
ENSRNOG00000016722	2118.93	-0.0628101	0.0419208	-1.49831	0.134054	0.234203	ENSRNOG00000016722	Xpo6	exportin 6 [Source:RGD Symbol;Acc:1311491]
ENSRNOG00000048397	1312.82	0.0941462	0.0682238	1.37996	0.167599	0.27973	ENSRNOG00000048397	Sephs2	selenophosphate synthetase 2 [Source:RGD Symbol;Acc:1308827]
ENSRNOG00000017728	512.798	-0.0639756	0.0822841	-0.777497	0.436865	0.571877	ENSRNOG00000017728	Edrf1	erythroid differentiation regulatory factor 1 [Source:RGD Symbol;Acc:1306820]
ENSRNOG00000067450	1158.55	0.203258	0.0564398	3.60132	0.000316603	0.00158918	ENSRNOG00000067450	Zfp146	zinc finger protein 146 [Source:RGD Symbol;Acc:7630088]
ENSRNOG00000015552	842.789	0.171817	0.0610811	2.81293	0.00490926	0.0159982	ENSRNOG00000015552	Ppil4	peptidylprolyl isomerase like 4 [Source:RGD Symbol;Acc:1311051]
ENSRNOG00000016919	1535.42	0.0690129	0.0676901	1.01954	0.307946	0.443979	ENSRNOG00000016919	Scaf8	SR-related CTD-associated factor 8 [Source:RGD Symbol;Acc:708362]
ENSRNOG00000019106	5259.63	0.00812319	0.0470538	0.172636	0.862937	0.912571	ENSRNOG00000019106	Rps17	40S ribosomal protein S17-like [Source:RGD Symbol;Acc:2318277]
ENSRNOG00000010959	228.684	-0.35625	0.118529	-3.00558	0.00265071	0.00958927	ENSRNOG00000010959	Klhl25	kelch-like family member 25 [Source:RGD Symbol;Acc:1310815]
ENSRNOG00000021474	105.442	-0.0334585	0.197831	-0.169127	0.865697	0.914647	ENSRNOG00000021474	Siglec5	sialic acid binding Ig-like lectin 5 [Source:RGD Symbol;Acc:1305432]
ENSRNOG00000028274	5358.07	-0.257147	0.073898	-3.47976	0.000501861	0.00234066	ENSRNOG00000028274	Myrf	myelin regulatory factor [Source:RGD Symbol;Acc:1306622]
ENSRNOG00000024410	599.296	-0.235793	0.081533	-2.892	0.00382804	0.0130434	ENSRNOG00000024410	Blvrb	biliverdin reductase B [Source:RGD Symbol;Acc:1306080]
ENSRNOG00000010017	727.715	0.457628	0.0883626	5.17898	2.23104e-07	3.01261e-06	ENSRNOG00000010017	Wee1	WEE1 G2 checkpoint kinase [Source:RGD Symbol;Acc:1307895]
ENSRNOG00000050015	54.423	-0.211118	0.238589	-0.884864	0.37623	0.514537	ENSRNOG00000050015	Cox7a1	cytochrome c oxidase subunit 7A1 [Source:RGD Symbol;Acc:6496527]
ENSRNOG00000047692	65.2683	0.322619	0.189291	1.70436	0.0883145	0.169355	ENSRNOG00000047692	Hells	helicase, lymphoid specific [Source:RGD Symbol;Acc:1309820]
ENSRNOG00000065271	107.365	0.202122	0.149997	1.34751	0.177816	0.292635	ENSRNOG00000065271	Fam174b	family with sequence similarity 174, member B [Source:RGD Symbol;Acc:1596692]
ENSRNOG00000020304	1034.67	-0.329199	0.0881831	-3.73314	0.000189111	0.00101758	ENSRNOG00000020304	Pdcd11	programmed cell death 11 [Source:RGD Symbol;Acc:1304933]
ENSRNOG00000017418	7711.53	0.134065	0.0441744	3.0349	0.00240616	0.00880688	ENSRNOG00000017418	Rps3	ribosomal protein S3 [Source:RGD Symbol;Acc:619888]
ENSRNOG00000012369	79.6963	0.156946	0.171165	0.916925	0.359182	0.496943	ENSRNOG00000012369	Fam174b	family with sequence similarity 174, member B [Source:RGD Symbol;Acc:1596692]
ENSRNOG00000014450	871.499	0.207258	0.0709313	2.92195	0.00347845	0.0120194	ENSRNOG00000014450	Shprh	SNF2 histone linker PHD RING helicase [Source:RGD Symbol;Acc:1310342]
ENSRNOG00000067065	3557.57	0.10377	0.0490985	2.11351	0.0345569	0.0797444	ENSRNOG00000067065	Capns1	calpain, small subunit 1 [Source:RGD Symbol;Acc:2270]
ENSRNOG00000037298	151.386	0.284121	0.130583	2.17579	0.0295708	0.0705235	ENSRNOG00000037298	C1h19orf81	simlar to human chromosome 19 open reading frame 81 [Source:RGD Symbol;Acc:1309036]
ENSRNOG00000016825	158.457	0.106256	0.150262	0.707138	0.479481	0.610644	ENSRNOG00000016825	Polr1g	RNA polymerase I subunit G [Source:RGD Symbol;Acc:1591707]
ENSRNOG00000024737	1542.8	-0.102641	0.064439	-1.59284	0.111196	0.202875	ENSRNOG00000024737	Tnrc6a	trinucleotide repeat containing adaptor 6A [Source:RGD Symbol;Acc:1307268]
ENSRNOG00000013624	44.3806	-0.241461	0.223097	-1.08232	0.279112	0.412923	ENSRNOG00000013624	Uevld	UEV and lactate/malate dehyrogenase domains [Source:RGD Symbol;Acc:1587416]
ENSRNOG00000070456	23.3265	0.294201	0.337567	0.871534	0.383463	0.521328	ENSRNOG00000070456	LOC108348146	vomeronasal type-1 receptor 3-like [Source:RGD Symbol;Acc:11394442]
ENSRNOG00000020325	67.7761	-0.194322	0.174556	-1.11323	0.265608	0.398225	ENSRNOG00000020325	Calhm2	calcium homeostasis modulator family member 2 [Source:RGD Symbol;Acc:1308276]
ENSRNOG00000015413	203.555	-0.368016	0.144385	-2.54884	0.0108081	0.0308495	ENSRNOG00000015413	Qpctl	glutaminyl-peptide cyclotransferase-like [Source:RGD Symbol;Acc:1308128]
ENSRNOG00000016897	1072.95	-0.25314	0.062162	-4.07226	4.65599e-05	0.000305387	ENSRNOG00000016897	Rlbp1	retinaldehyde binding protein 1 [Source:RGD Symbol;Acc:1309649]
ENSRNOG00000037690	49.5673	-0.250026	0.241389	-1.03578	0.300305	0.435838	ENSRNOG00000037690	Sertad3	SERTA domain containing 3 [Source:RGD Symbol;Acc:1564271]
ENSRNOG00000014330	5244.75	0.290527	0.0535632	5.42401	5.82759e-08	9.26711e-07	ENSRNOG00000014330	Pcmt1	protein-L-isoaspartate (D-aspartate) O-methyltransferase 1 [Source:RGD Symbol;Acc:3268]
ENSRNOG00000013223	1449.52	0.047953	0.0740994	0.647144	0.517539	0.645164	ENSRNOG00000013223	Fah	fumarylacetoacetate hydrolase [Source:RGD Symbol;Acc:61932]
ENSRNOG00000046112	270.65	-0.268879	0.110902	-2.42448	0.0153302	0.0412671	ENSRNOG00000046112	Dedd2	death effector domain containing 2 [Source:RGD Symbol;Acc:1588968]
ENSRNOG00000027264	1827.49	-0.351516	0.0685264	-5.12964	2.90295e-07	3.77333e-06	ENSRNOG00000027264	Dagla	diacylglycerol lipase, alpha [Source:RGD Symbol;Acc:1359461]
ENSRNOG00000032798	1078.8	-0.155115	0.0805223	-1.92636	0.0540593	0.114577	ENSRNOG00000032798	Slco3a1	solute carrier organic anion transporter family, member 3a1 [Source:RGD Symbol;Acc:620227]
ENSRNOG00000019319	1188.83	0.0525767	0.0596344	0.881651	0.377965	0.516202	ENSRNOG00000019319	Fchsd2	FCH and double SH3 domains 2 [Source:RGD Symbol;Acc:1304812]
ENSRNOG00000018603	1811.01	-0.409795	0.0978605	-4.18755	2.81987e-05	0.000199047	ENSRNOG00000018603	Carns1	carnosine synthase 1 [Source:RGD Symbol;Acc:1308234]
ENSRNOG00000027422	363.062	0.160306	0.0859437	1.86525	0.0621464	0.127955	ENSRNOG00000027422	Fastkd3	FAST kinase domains 3 [Source:RGD Symbol;Acc:1309729]
ENSRNOG00000020763	5582.95	-0.567138	0.144446	-3.92629	8.62668e-05	0.000517462	ENSRNOG00000020763	Snrnp70	small nuclear ribonucleoprotein U1 subunit 70 [Source:RGD Symbol;Acc:1307120]
ENSRNOG00000049505	141.243	0.0811212	0.120573	0.672796	0.501077	0.630799	ENSRNOG00000049505	Nup43	nucleoporin 43 [Source:RGD Symbol;Acc:1596513]
ENSRNOG00000059408	1131.45	-0.679936	0.115001	-5.91245	3.37049e-09	8.29261e-08	ENSRNOG00000059408	Prr12	proline rich 12 [Source:RGD Symbol;Acc:1309896]
ENSRNOG00000048250	183.392	0.113343	0.128335	0.88318	0.377139	0.51543	ENSRNOG00000048250	Ldaf1	lipid droplet assembly factor 1 [Source:RGD Symbol;Acc:727895]
ENSRNOG00000028891	83.6048	-0.409807	0.185988	-2.2034	0.0275663	0.0667319	ENSRNOG00000028891	Cyp2t1	cytochrome P450, family 2, subfamily t, polypeptide 1 [Source:RGD Symbol;Acc:620086]
ENSRNOG00000019959	1386.67	-0.374545	0.0695062	-5.38866	7.09868e-08	1.10532e-06	ENSRNOG00000019959	Kcnc3	potassium voltage-gated channel subfamily C member 3 [Source:RGD Symbol;Acc:621358]
ENSRNOG00000020452	808.28	0.0624231	0.0548918	1.1372	0.255454	0.386405	ENSRNOG00000020452	Nsmce4a	NSE4 homolog A, SMC5-SMC6 complex component [Source:RGD Symbol;Acc:1309025]
ENSRNOG00000050224	465.76	0.135166	0.0745686	1.81264	0.0698879	0.14032	ENSRNOG00000050224	Stambpl1	STAM binding protein-like 1 [Source:RGD Symbol;Acc:1583011]
ENSRNOG00000013439	54.0731	-0.1366	0.199259	-0.685538	0.493005	0.624	ENSRNOG00000013439	Cpn1	carboxypeptidase N subunit 1 [Source:RGD Symbol;Acc:70931]
ENSRNOG00000014916	842.639	0.269975	0.0782947	3.44819	0.000564356	0.00257981	ENSRNOG00000014916	Lats1	large tumor suppressor kinase 1 [Source:RGD Symbol;Acc:1564085]
ENSRNOG00000020263	29100.4	-0.154788	0.0676515	-2.28802	0.0221365	0.0558286	ENSRNOG00000020263	Atp1a3	ATPase Na+/K+ transporting subunit alpha 3 [Source:RGD Symbol;Acc:2169]
ENSRNOG00000051197	306.938	0.137123	0.0960136	1.42816	0.153246	0.260576	ENSRNOG00000051197	LOC120097345	60S ribosomal protein L7a [Source:RGD Symbol;Acc:41344265]
ENSRNOG00000020947	1664.32	-0.614272	0.15354	-4.00074	6.31447e-05	0.000397092	ENSRNOG00000020947	Egln2	egl-9 family hypoxia-inducible factor 2 [Source:RGD Symbol;Acc:631376]
ENSRNOG00000020597	127.156	0.324608	0.121075	2.68104	0.00733928	0.02233	ENSRNOG00000020597	C1h10orf88	similar to human chromosome 10 open reading frame 88 [Source:RGD Symbol;Acc:1305014]
ENSRNOG00000017826	513.405	-0.0407198	0.0720803	-0.564922	0.572127	0.69153	ENSRNOG00000017826	Mtrr	5-methyltetrahydrofolate-homocysteine methyltransferase reductase [Source:RGD Symbol;Acc:1308671]
ENSRNOG00000013506	1270.41	0.494414	0.0681528	7.2545	4.03152e-13	2.98332e-11	ENSRNOG00000013506	Zfand6	zinc finger AN1-type containing 6 [Source:RGD Symbol;Acc:1359317]
ENSRNOG00000014277	406.042	0.167024	0.0938563	1.77957	0.0751456	0.149	ENSRNOG00000014277	Zdhhc13	zinc finger DHHC-type palmitoyltransferase 13 [Source:RGD Symbol;Acc:1309736]
ENSRNOG00000012641	1710.84	0.379068	0.0762459	4.97166	6.63825e-07	7.76437e-06	ENSRNOG00000012641	Sfr1	SWI5-dependent homologous recombination repair protein 1 [Source:RGD Symbol;Acc:1305481]
ENSRNOG00000015675	327.71	0.420144	0.10348	4.06016	4.90396e-05	0.000319827	ENSRNOG00000015675	Nell1	neural EGFL like 1 [Source:RGD Symbol;Acc:620998]
ENSRNOG00000050206	2176.61	-0.366196	0.0559704	-6.54266	6.04332e-11	2.57426e-09	ENSRNOG00000050206	Shank2	SH3 and multiple ankyrin repeat domains 2 [Source:RGD Symbol;Acc:628772]
ENSRNOG00000012002	601.066	-0.316999	0.0717564	-4.41772	9.97498e-06	8.04111e-05	ENSRNOG00000012002	Iqgap1	IQ motif containing GTPase activating protein 1 [Source:RGD Symbol;Acc:1311884]
ENSRNOG00000012788	1184.48	0.143549	0.0564432	2.54324	0.0109829	0.0312887	ENSRNOG00000012788	Clns1a	chloride nucleotide-sensitive channel 1A [Source:RGD Symbol;Acc:61884]
ENSRNOG00000019418	3277.14	-0.746389	0.115225	-6.47768	9.31436e-11	3.75286e-09	ENSRNOG00000019418	Lrrc4b	leucine rich repeat containing 4B [Source:RGD Symbol;Acc:1307121]
ENSRNOG00000042308	34.6901	0.534518	0.235605	2.2687	0.0232864	0.0581727	ENSRNOG00000042308	Zfp455l1	zinc finger protein 455 like 1 [Source:RGD Symbol;Acc:1594231]
ENSRNOG00000012574	591.601	0.0266181	0.0662072	0.402043	0.687652	0.785138	ENSRNOG00000012574	Pum3	pumilio RNA-binding family member 3 [Source:RGD Symbol;Acc:1564753]
ENSRNOG00000047040	44.0695	-0.317453	0.235691	-1.3469	0.178011	0.292891	ENSRNOG00000047040	Lhb	luteinizing hormone subunit beta [Source:RGD Symbol;Acc:3006]
ENSRNOG00000001500	883.005	-0.182298	0.0842376	-2.16409	0.0304575	0.0721908	ENSRNOG00000001500	Rab4b	RAB4B, member RAS oncogene family [Source:RGD Symbol;Acc:620931]
ENSRNOG00000016737	68.8673	0.106383	0.180294	0.590056	0.555153	0.677686	ENSRNOG00000016737	Tcerg1l	transcription elongation regulator 1-like [Source:RGD Symbol;Acc:1562437]
ENSRNOG00000019413	171.06	-0.0754712	0.117638	-0.641555	0.521162	0.648438	ENSRNOG00000019413	Atg16l2	autophagy related 16-like 2 [Source:RGD Symbol;Acc:1311400]
ENSRNOG00000068445	3251.83	-0.82091	0.152266	-5.39129	6.99555e-08	1.09154e-06	ENSRNOG00000068445	Rplp2	ribosomal protein lateral stalk subunit P2 [Source:RGD Symbol;Acc:621775]
ENSRNOG00000015844	629.852	-0.0891738	0.0821068	-1.08607	0.277448	0.410989	ENSRNOG00000015844	Snrpd2	small nuclear ribonucleoprotein D2 polypeptide [Source:RGD Symbol;Acc:1593018]
ENSRNOG00000068953	357.166	0.160847	0.0987328	1.62911	0.103289	0.19163	ENSRNOG00000068953
ENSRNOG00000017963	479.573	0.194784	0.0825563	2.3594	0.0183044	0.0478848	ENSRNOG00000017963	RGD1566325	similar to regulator of sex-limitation candidate 16 [Source:RGD Symbol;Acc:1566325]
ENSRNOG00000019532	1725.38	-0.220818	0.0811813	-2.72006	0.00652697	0.0203303	ENSRNOG00000019532	Emc10	ER membrane protein complex subunit 10 [Source:RGD Symbol;Acc:1303214]
ENSRNOG00000015217	492.559	-0.0101549	0.0962763	-0.105477	0.915997	0.947485	ENSRNOG00000015217	Ltv1	LTV1 ribosome biogenesis factor [Source:RGD Symbol;Acc:1311264]
ENSRNOG00000016267	2660.44	0.12201	0.0608643	2.00463	0.0450029	0.0986048	ENSRNOG00000016267	Chst15	carbohydrate sulfotransferase 15 [Source:RGD Symbol;Acc:628881]
ENSRNOG00000021510	334.82	-0.082606	0.104555	-0.790069	0.429488	0.564742	ENSRNOG00000021510	Tbc1d10c	TBC1 domain family, member 10C [Source:RGD Symbol;Acc:1311490]
ENSRNOG00000020425	2367.49	0.003821	0.0457787	0.0834667	0.93348	0.959213	ENSRNOG00000020425	Stim1	stromal interaction molecule 1 [Source:RGD Symbol;Acc:1306831]
ENSRNOG00000017383	574.499	0.305806	0.089655	3.41092	0.000647441	0.00290979	ENSRNOG00000017383	Hikeshi	heat shock protein nuclear import factor hikeshi [Source:RGD Symbol;Acc:1359455]
ENSRNOG00000019161	502.692	0.536587	0.089543	5.9925	2.06638e-09	5.36255e-08	ENSRNOG00000019161	Cpeb1	cytoplasmic polyadenylation element binding protein 1 [Source:RGD Symbol;Acc:1310421]
ENSRNOG00000047526	377.203	-0.287453	0.0822158	-3.49633	0.000471706	0.00222529	ENSRNOG00000047526	Zfp526	zinc finger protein 526 [Source:RGD Symbol;Acc:1588959]
ENSRNOG00000028041	306.862	0.382323	0.130398	2.93196	0.00336832	0.011701	ENSRNOG00000028041	Tnnt1	troponin T1, slow skeletal type [Source:RGD Symbol;Acc:621852]
ENSRNOG00000016462	266.734	0.263732	0.102022	2.58504	0.00973689	0.0283055	ENSRNOG00000016462	LOC102547287	zinc finger protein 728-like [Source:RGD Symbol;Acc:7718701]
ENSRNOG00000010664	450.965	-0.0589646	0.0881205	-0.669137	0.503408	0.632891	ENSRNOG00000010664	Wdr73	WD repeat domain 73 [Source:RGD Symbol;Acc:1306429]
ENSRNOG00000019424	95.9617	-0.235501	0.193936	-1.21432	0.224624	0.350671	ENSRNOG00000019424	Aspdh	aspartate dehydrogenase domain containing [Source:RGD Symbol;Acc:1310111]
ENSRNOG00000016790	1288.25	0.089525	0.0604461	1.48107	0.138587	0.2403	ENSRNOG00000016790	Kmt5b	lysine methyltransferase 5B [Source:RGD Symbol;Acc:1311637]
ENSRNOG00000039730	599.507	-0.00356213	0.0686223	-0.0519092	0.958601	0.975238	ENSRNOG00000039730	Orai3	ORAI calcium release-activated calcium modulator 3 [Source:RGD Symbol;Acc:1306538]
ENSRNOG00000020949	47.6342	0.339977	0.220709	1.54039	0.123466	0.219736	ENSRNOG00000020949	Hsd17b14	hydroxysteroid (17-beta) dehydrogenase 14 [Source:RGD Symbol;Acc:1588673]
ENSRNOG00000013358	128.299	0.24776	0.136396	1.81647	0.0692976	0.139416	ENSRNOG00000013358	Aqp11	aquaporin 11 [Source:RGD Symbol;Acc:628763]
ENSRNOG00000049259	319.465	0.334116	0.0890272	3.75297	0.000174753	0.000949546	ENSRNOG00000049259	LOC102549842	zinc finger protein 91-like [Source:RGD Symbol;Acc:7600894]
ENSRNOG00000015860	170.092	0.363705	0.165406	2.19887	0.0278874	0.0673552	ENSRNOG00000015860	Gipr	gastric inhibitory polypeptide receptor [Source:RGD Symbol;Acc:2689]
ENSRNOG00000018517	173.985	0.28445	0.135238	2.10332	0.0354378	0.0813709	ENSRNOG00000018517	Trim21	tripartite motif-containing 21 [Source:RGD Symbol;Acc:1305795]
ENSRNOG00000050554	35.95	-0.145015	0.278121	-0.521409	0.602082	0.716212	ENSRNOG00000050554	C1h10orf143	similar to human chromosome 10 open reading frame 143 [Source:RGD Symbol;Acc:2318344]
ENSRNOG00000021206	1478.91	0.0365931	0.059104	0.619131	0.53583	0.660966	ENSRNOG00000021206	Plaat3	phospholipase A and acyltransferase 3 [Source:RGD Symbol;Acc:2829]
ENSRNOG00000050223	2105.9	-0.0546991	0.06218	-0.879689	0.379028	0.517085	ENSRNOG00000050223	Rin1	Ras and Rab interactor 1 [Source:RGD Symbol;Acc:620006]
ENSRNOG00000069921	322.153	0.283255	0.0840542	3.36991	0.000751933	0.00330003	ENSRNOG00000069921	Zfp748	zinc finger protein 748 [Source:RGD Symbol;Acc:1594173]
ENSRNOG00000016054	1532.5	0.0300991	0.0595782	0.505202	0.613417	0.725883	ENSRNOG00000016054	Tab2	TGF-beta activated kinase 1/MAP3K7 binding protein 2 [Source:RGD Symbol;Acc:1309527]
ENSRNOG00000020956	252.253	-0.100368	0.115549	-0.868617	0.385057	0.522714	ENSRNOG00000020956	Bcat2	branched chain amino acid transaminase 2 [Source:RGD Symbol;Acc:68948]
ENSRNOG00000001501	332.218	-0.25234	0.133442	-1.891	0.0586242	0.121978	ENSRNOG00000001501	Snrpa	small nuclear ribonucleoprotein polypeptide A [Source:RGD Symbol;Acc:1307416]
ENSRNOG00000020417	2634.31	0.0619527	0.0495273	1.25088	0.210978	0.33422	ENSRNOG00000020417	Gsk3a	glycogen synthase kinase 3 alpha [Source:RGD Symbol;Acc:620351]
ENSRNOG00000013877	136.653	-0.177439	0.147471	-1.20321	0.228895	0.355778	ENSRNOG00000013877	Ttc23	tetratricopeptide repeat domain 23 [Source:RGD Symbol;Acc:1310409]
ENSRNOG00000064721	772.126	0.212448	0.0708762	2.99746	0.00272241	0.00979884	ENSRNOG00000064721	Rgmb	repulsive guidance molecule BMP co-receptor b [Source:RGD Symbol;Acc:1595392]
ENSRNOG00000018878	504.953	-0.378385	0.118783	-3.1855	0.00144504	0.00571743	ENSRNOG00000018878	Ssh3	slingshot protein phosphatase 3 [Source:RGD Symbol;Acc:1308679]
ENSRNOG00000014852	389.995	0.541506	0.130167	4.16009	3.18127e-05	0.000221283	ENSRNOG00000014852	Fbxo30	F-box protein 30 [Source:RGD Symbol;Acc:1359367]
ENSRNOG00000037715	583.967	0.144894	0.0711749	2.03574	0.0417763	0.0930243	ENSRNOG00000037715	Actmap	actin maturation protease [Source:RGD Symbol;Acc:1560854]
ENSRNOG00000020793	670.961	-0.320612	0.0949569	-3.37639	0.000734427	0.00323174	ENSRNOG00000020793	Ruvbl2	RuvB-like AAA ATPase 2 [Source:RGD Symbol;Acc:1306509]
ENSRNOG00000047145	353.496	0.152101	0.0912781	1.66634	0.095645	0.180336	ENSRNOG00000047145	LOC102551340	zinc finger protein 728-like [Source:RGD Symbol;Acc:7697243]
ENSRNOG00000019442	779.697	-0.670734	0.183236	-3.66049	0.000251733	0.00130475	ENSRNOG00000019442	Josd2	Josephin domain containing 2 [Source:RGD Symbol;Acc:1307305]
[truncated: 14,482 more rows]

## Sheet: genotype_5m
ensembl_geneID	baseMean	log2FoldChange	lfcSE	stat	pvalue	padj	ensembl	rgd_symbol	description
[truncated: 14,948 more rows]

## Sheet: genotype_12m
ensembl_geneID	baseMean	log2FoldChange	lfcSE	stat	pvalue	padj	ensembl	rgd_symbol	description
[truncated: 14,948 more rows]

[truncated: 1 more sheets: interaction]
