# Supplementary material for: Brain region-specific and systemic transcriptomic alterations in a human alpha-synuclein overexpressing rat model
Source: Aging (Albany NY). 2025 Oct 20;17(10):2598–636. doi: 10.18632/aging.206331 (PMC12606970; doi:10.18632/aging.206331)
Supplement: Supplementary Table 5 [file aging-17-10-206331-s006.xlsx]

## Sheet: age_WT
Supplementary Table 5. Cerebellar differential gene expression analysis results for each comparison.
ensembl_geneID	baseMean	log2FoldChange	lfcSE	stat	pvalue	padj	ensembl	rgd_symbol	description
ENSRNOG00000070901	3470.09	-0.0204762	0.0639084	-0.320399	0.748666	0.806422	ENSRNOG00000070901	Irgq	immunity-related GTPase Q [Source:RGD Symbol;Acc:1309409]
ENSRNOG00000018029	142.906	0.53734	0.147987	3.631	0.000282328	0.000788856	ENSRNOG00000018029	Doc2g	double C2-like domains, gamma [Source:RGD Symbol;Acc:1307473]
ENSRNOG00000032625	280.684	-0.266968	0.110422	-2.41769	0.0156192	0.0299137	ENSRNOG00000032625	Zfp108	zinc finger protein 108 [Source:RGD Symbol;Acc:1564214]
ENSRNOG00000029315	107.701	0.473615	0.15035	3.15009	0.00163219	0.00392531	ENSRNOG00000029315	LOC690251	similar to SUMO/sentrin specific protease 5 [Source:RGD Symbol;Acc:1582860]
ENSRNOG00000016356	10744.5	0.0280081	0.0453821	0.617163	0.537127	0.624419	ENSRNOG00000016356	Got1	glutamic-oxaloacetic transaminase 1 [Source:RGD Symbol;Acc:2721]
ENSRNOG00000015810	48.6043	-0.109972	0.221928	-0.49553	0.620226	0.698488	ENSRNOG00000015810	Trip13	thyroid hormone receptor interactor 13 [Source:RGD Symbol;Acc:1308516]
ENSRNOG00000017538	133.356	0.264825	0.160099	1.65413	0.0981004	0.15025	ENSRNOG00000017538	Lrrc27	leucine rich repeat containing 27 [Source:RGD Symbol;Acc:1559981]
ENSRNOG00000027204	985.488	-0.468671	0.0760379	-6.16365	7.1089e-10	4.66252e-09	ENSRNOG00000027204	Map6	microtubule-associated protein 6 [Source:RGD Symbol;Acc:61804]
ENSRNOG00000070886	993.132	0.123614	0.0709108	1.74324	0.0812923	0.127547	ENSRNOG00000070886
ENSRNOG00000014903	2216.66	-0.00968303	0.0497064	-0.194805	0.845546	0.884403	ENSRNOG00000014903	Zfyve27	zinc finger FYVE-type containing 27 [Source:RGD Symbol;Acc:735177]
ENSRNOG00000021051	1428.73	-0.320872	0.0607809	-5.27915	1.29783e-07	6.19929e-07	ENSRNOG00000021051	Cyth2	cytohesin 2 [Source:RGD Symbol;Acc:620398]
ENSRNOG00000011160	7935.91	0.0559491	0.055766	1.00328	0.315724	0.40315	ENSRNOG00000011160	Sv2b	synaptic vesicle glycoprotein 2b [Source:RGD Symbol;Acc:619716]
ENSRNOG00000017748	60.1023	-0.52038	0.240533	-2.16344	0.030507	0.0541026	ENSRNOG00000017748	Nkx6-2	NK6 homeobox 2 [Source:RGD Symbol;Acc:1307280]
ENSRNOG00000016227	1863.83	-0.286486	0.0470755	-6.08566	1.16011e-09	7.41134e-09	ENSRNOG00000016227	Glrx3	glutaredoxin 3 [Source:RGD Symbol;Acc:69414]
ENSRNOG00000016906	80.7318	-0.634127	0.186343	-3.40302	0.000666465	0.00174091	ENSRNOG00000016906	Lipt2	lipoyl(octanoyl) transferase 2 [Source:RGD Symbol;Acc:1305211]
ENSRNOG00000027582	5171.73	-0.549889	0.0723289	-7.60262	2.90203e-14	3.22668e-13	ENSRNOG00000027582	Dpysl4	dihydropyrimidinase-like 4 [Source:RGD Symbol;Acc:2409]
ENSRNOG00000009830	326.045	0.233776	0.100056	2.33646	0.0194675	0.0362337	ENSRNOG00000009830	Fam204a	family with sequence similarity 204, member A [Source:RGD Symbol;Acc:1305500]
ENSRNOG00000012742	87.6489	-0.0799661	0.159318	-0.501927	0.615719	0.694867	ENSRNOG00000012742	Irx2	iroquois homeobox 2 [Source:RGD Symbol;Acc:1309834]
ENSRNOG00000013767	163.02	-0.151193	0.130813	-1.15579	0.247767	0.330076	ENSRNOG00000013767	Ccdc61	coiled-coil domain containing 61 [Source:RGD Symbol;Acc:1307390]
ENSRNOG00000032699	13850.5	-0.129575	0.0453153	-2.85941	0.00424425	0.0093792	ENSRNOG00000032699	Ttyh1	tweety family member 1 [Source:RGD Symbol;Acc:1310103]
ENSRNOG00000018408	849.061	-0.291396	0.0601542	-4.84415	1.27157e-06	5.27255e-06	ENSRNOG00000018408	RGD1307554	similar to CG16812-PA [Source:RGD Symbol;Acc:1307554]
ENSRNOG00000018334	147.086	-0.146273	0.137236	-1.06585	0.286493	0.371675	ENSRNOG00000018334	Ctu1	cytosolic thiouridylase subunit 1 [Source:RGD Symbol;Acc:1308740]
ENSRNOG00000067907	328.012	-0.00979828	0.127925	-0.0765941	0.938946	0.954954	ENSRNOG00000067907
ENSRNOG00000023407	304.807	-0.472295	0.0966288	-4.88772	1.02011e-06	4.27504e-06	ENSRNOG00000023407	Mrpl36	mitochondrial ribosomal protein L36 [Source:RGD Symbol;Acc:1306375]
ENSRNOG00000010529	70.6329	-0.293282	0.221164	-1.32609	0.184811	0.25703	ENSRNOG00000010529	Thbs2	thrombospondin 2 [Source:RGD Symbol;Acc:1310979]
ENSRNOG00000012684	696.86	-0.431892	0.0712043	-6.06554	1.31512e-09	8.33926e-09	ENSRNOG00000012684	Bloc1s2	biogenesis of lysosomal organelles complex-1, subunit 2 [Source:RGD Symbol;Acc:1306551]
ENSRNOG00000014258	40.4727	0.690148	0.259891	2.65553	0.0079185	0.0163335	ENSRNOG00000014258	Rab32	RAB32, member RAS oncogene family [Source:RGD Symbol;Acc:1559997]
ENSRNOG00000010918	129.347	0.0501985	0.151142	0.332129	0.739792	0.799235	ENSRNOG00000010918	Cebpa	CCAAT/enhancer binding protein alpha [Source:RGD Symbol;Acc:2326]
ENSRNOG00000067027	106.195	-0.294643	0.154468	-1.90747	0.0564603	0.0927129	ENSRNOG00000067027	LOC108349691	histone H3.3-like [Source:RGD Symbol;Acc:11381356]
ENSRNOG00000019416	1051.86	0.0355566	0.0681671	0.521609	0.601943	0.682556	ENSRNOG00000019416	Zfp61	zinc finger protein 94 [Source:RGD Symbol;Acc:1560430]
ENSRNOG00000014946	1474.68	0.0340457	0.0466417	0.729941	0.465426	0.555694	ENSRNOG00000014946	Thumpd1	THUMP domain containing 1 [Source:RGD Symbol;Acc:1308854]
ENSRNOG00000020318	616.029	0.0247998	0.0692096	0.35833	0.720097	0.782557	ENSRNOG00000020318	Pnkp	polynucleotide kinase 3'-phosphatase [Source:RGD Symbol;Acc:1303331]
ENSRNOG00000070104	26.8547	0.522787	0.300731	1.73839	0.0821429	0.128693	ENSRNOG00000070104
ENSRNOG00000050445	3796.68	-0.367873	0.0495485	-7.42449	1.13215e-13	1.17094e-12	ENSRNOG00000050445	Gde1	glycerophosphodiester phosphodiesterase 1 [Source:RGD Symbol;Acc:621788]
ENSRNOG00000013945	682.471	-0.114691	0.0689842	-1.66257	0.0963994	0.147972	ENSRNOG00000013945	Itpkc	inositol-trisphosphate 3-kinase C [Source:RGD Symbol;Acc:631336]
ENSRNOG00000065397	21.0314	1.10063	0.375408	2.93181	0.00336989	0.00760675	ENSRNOG00000065397	Rnu6-856	RNA, U6 small nuclear 856 [Source:RGD Symbol;Acc:41041613]
ENSRNOG00000031947	36.3474	-0.218109	0.240797	-0.90578	0.365052	0.453963	ENSRNOG00000031947	LOC100361060	ribosomal protein L36-like [Source:RGD Symbol;Acc:2320900]
ENSRNOG00000016565	108.259	-0.507276	0.162941	-3.11325	0.00185036	0.00440333	ENSRNOG00000016565	Zfp524	zinc finger protein 524 [Source:RGD Symbol;Acc:1565485]
ENSRNOG00000019138	184.916	-0.126221	0.138844	-0.909086	0.363305	0.45209	ENSRNOG00000019138	Clec11a	C-type lectin domain containing 11A [Source:RGD Symbol;Acc:3627]
ENSRNOG00000065728	38.5093	0.0980976	0.268795	0.364953	0.715146	0.778342	ENSRNOG00000065728
ENSRNOG00000065649	379.883	-0.11611	0.0827914	-1.40244	0.160783	0.228918	ENSRNOG00000065649	Zfp94	zinc finger protein 94 [Source:RGD Symbol;Acc:1560430]
ENSRNOG00000064423	220.117	1.71688	0.181337	9.46789	2.85556e-21	6.60281e-20	ENSRNOG00000064423	LOC685793	similar to serine/threonine kinase [Source:RGD Symbol;Acc:1590175]
ENSRNOG00000016574	606.882	-0.171653	0.0699696	-2.45326	0.0141569	0.0274426	ENSRNOG00000016574	Fiz1	FLT3-interacting zinc finger 1 [Source:RGD Symbol;Acc:1306359]
ENSRNOG00000055971	62.712	0.300126	0.210601	1.42509	0.154131	0.220702	ENSRNOG00000055971	AABR07000544.1
ENSRNOG00000055608	591.953	-0.142277	0.1211	-1.17488	0.240043	0.321142	ENSRNOG00000055608	LOC102548695	zinc finger protein 45-like [Source:RGD Symbol;Acc:7529325]
ENSRNOG00000020347	1965.48	0.202227	0.0601668	3.3611	0.000776321	0.00199592	ENSRNOG00000020347	Nup98	nucleoporin 98 and 96 precursor [Source:RGD Symbol;Acc:71033]
ENSRNOG00000065259	29.5431	0.55061	0.305094	1.80473	0.0711176	0.113458	ENSRNOG00000065259
ENSRNOG00000068222	101.772	2.55289	0.23636	10.8009	3.40973e-27	1.39472e-25	ENSRNOG00000068222	LOC100910657	sperm motility kinase Y-like [Source:RGD Symbol;Acc:6497368]
ENSRNOG00000016608	170.653	-0.306528	0.132279	-2.31728	0.0204886	0.0378903	ENSRNOG00000016608	Zfp579	zinc finger protein 579 [Source:RGD Symbol;Acc:1308475]
ENSRNOG00000012730	128.66	-0.0254771	0.132606	-0.192126	0.847643	0.885971	ENSRNOG00000012730	Lrrk1	leucine-rich repeat kinase 1 [Source:RGD Symbol;Acc:1308000]
ENSRNOG00000068539	59.5613	0.680697	0.21893	3.10921	0.0018759	0.00446045	ENSRNOG00000068539
ENSRNOG00000018117	3999.22	-0.411789	0.0508565	-8.09708	5.62944e-16	7.58304e-15	ENSRNOG00000018117	Ndufv1	NADH:ubiquinone oxidoreductase core subunit V1 [Source:RGD Symbol;Acc:1359247]
ENSRNOG00000068720	33.6526	0.385497	0.269552	1.43014	0.152676	0.218812	ENSRNOG00000068720
ENSRNOG00000016362	62.5042	-0.533572	0.223501	-2.38734	0.0169709	0.0321255	ENSRNOG00000016362	Gpr4	G protein-coupled receptor 4 [Source:RGD Symbol;Acc:1311604]
ENSRNOG00000017307	229.031	0.225515	0.125718	1.79382	0.0728417	0.115777	ENSRNOG00000017307	Prss23	serine protease 23 [Source:RGD Symbol;Acc:1359545]
ENSRNOG00000020942	23.2043	-0.779706	0.313374	-2.4881	0.0128427	0.0251978	ENSRNOG00000020942	Plekha4	pleckstrin homology domain containing A4 [Source:RGD Symbol;Acc:735133]
ENSRNOG00000017079	2779.61	0.357856	0.0692006	5.17129	2.32482e-07	1.06933e-06	ENSRNOG00000017079	Pgm2l1	phosphoglucomutase 2-like 1 [Source:RGD Symbol;Acc:1583226]
ENSRNOG00000017795	735.009	-0.356933	0.107286	-3.32693	0.000878089	0.00223149	ENSRNOG00000017795	Hspbp1	HSPA (Hsp70) binding protein 1 [Source:RGD Symbol;Acc:628677]
ENSRNOG00000052607	93.2298	0.644435	0.162064	3.97643	6.99584e-05	0.00021922	ENSRNOG00000052607	Snora12	small nucleolar RNA, H/ACA box 12 [Source:RGD Symbol;Acc:41366654]
ENSRNOG00000052319	394.905	0.133182	0.0892438	1.49234	0.13561	0.198308	ENSRNOG00000052319	AABR07004881.1
ENSRNOG00000027542	91.2955	0.204531	0.173442	1.17925	0.238299	0.319264	ENSRNOG00000027542	LOC100302465	hypothetical LOC100302465 [Source:RGD Symbol;Acc:2311471]
ENSRNOG00000065457	1920.6	1.08945	0.100574	10.8323	2.42043e-27	1.00708e-25	ENSRNOG00000065457
ENSRNOG00000021478	2153.43	-0.157963	0.0620816	-2.54444	0.0109453	0.021817	ENSRNOG00000021478	Tpd52l1	TPD52 like 1 [Source:RGD Symbol;Acc:1594796]
ENSRNOG00000018090	2920.56	0.0146285	0.0550116	0.265916	0.790304	0.839748	ENSRNOG00000018090	Ppp6r1	protein phosphatase 6, regulatory subunit 1 [Source:RGD Symbol;Acc:1311409]
ENSRNOG00000069157	132.813	-0.152778	0.130471	-1.17097	0.241609	0.322879	ENSRNOG00000069157	Chchd4	coiled-coil-helix-coiled-coil-helix domain containing 4 [Source:RGD Symbol;Acc:1310746]
ENSRNOG00000070519	35.5141	1.91811	0.320402	5.98656	2.14325e-09	1.32435e-08	ENSRNOG00000070519
ENSRNOG00000015230	542.466	0.503776	0.0781659	6.44497	1.15626e-10	8.44994e-10	ENSRNOG00000015230	Ermard	ER membrane-associated RNA degradation [Source:RGD Symbol;Acc:1309374]
ENSRNOG00000017069	1170.52	-0.218975	0.0627865	-3.48761	0.000487364	0.00130645	ENSRNOG00000017069	Mark4	microtubule affinity regulating kinase 4 [Source:RGD Symbol;Acc:1591792]
ENSRNOG00000021013	954.947	0.737433	0.103429	7.12983	1.00495e-12	9.33049e-12	ENSRNOG00000021013	Stx3	syntaxin 3 [Source:RGD Symbol;Acc:621005]
ENSRNOG00000018677	2632.93	-0.119976	0.0518987	-2.31174	0.0207921	0.0383978	ENSRNOG00000018677	Akt2	AKT serine/threonine kinase 2 [Source:RGD Symbol;Acc:2082]
ENSRNOG00000019207	4998.32	-0.0179122	0.0649565	-0.275757	0.782735	0.833761	ENSRNOG00000019207	Shank1	SH3 and multiple ankyrin repeat domains 1 [Source:RGD Symbol;Acc:621011]
ENSRNOG00000070234	564.593	0.840355	0.0853037	9.85133	6.76447e-23	1.84985e-21	ENSRNOG00000070234	Zfp141	zinc finger protein 141 [Source:RGD Symbol;Acc:1597345]
ENSRNOG00000063629	129.263	0.443511	0.153632	2.88684	0.00389134	0.00867722	ENSRNOG00000063629
ENSRNOG00000067256	329.348	2.83729	0.237845	11.9292	8.33861e-33	5.52899e-31	ENSRNOG00000067256
ENSRNOG00000015734	1547.65	1.00845	0.0689262	14.6308	1.78628e-48	3.99055e-46	ENSRNOG00000015734	Ube3a	ubiquitin protein ligase E3A [Source:RGD Symbol;Acc:1306361]
ENSRNOG00000068800	542.588	0.418218	0.097923	4.27088	1.94699e-05	6.69007e-05	ENSRNOG00000068800
ENSRNOG00000069276	412.738	0.696698	0.0944137	7.37921	1.59237e-13	1.61811e-12	ENSRNOG00000069276	LOC102548320	zinc finger protein 845-like [Source:RGD Symbol;Acc:7683572]
ENSRNOG00000062961	76.0947	0.534499	0.204117	2.61859	0.00882934	0.0180502	ENSRNOG00000062961
ENSRNOG00000054452	33.4013	2.19895	0.403376	5.45138	4.99802e-08	2.53763e-07	ENSRNOG00000054452	LOC120100374	small nucleolar RNA SNORA42/SNORA80 family [Source:RGD Symbol;Acc:41348685]
ENSRNOG00000049772	224.869	-0.415042	0.109726	-3.78254	0.000155238	0.000454661	ENSRNOG00000049772	Gemin7	gem (nuclear organelle) associated protein 7 [Source:RGD Symbol;Acc:1597035]
ENSRNOG00000053859	1159.28	0.275637	0.0586621	4.69872	2.61792e-06	1.0347e-05	ENSRNOG00000053859	Ranbp6	RAN binding protein 6 [Source:RGD Symbol;Acc:1305165]
ENSRNOG00000066647	22.8965	0.618155	0.333986	1.85084	0.0641925	0.103871	ENSRNOG00000066647
ENSRNOG00000066887	98.5458	0.188559	0.16071	1.17329	0.24068	0.321815	ENSRNOG00000066887	LOC102556805	rho GTPase-activating protein 20-like [Source:RGD Symbol;Acc:7734973]
ENSRNOG00000018915	21.728	0.16893	0.388891	0.434389	0.664006	0.73637	ENSRNOG00000018915	Tagap	T-cell activation RhoGTPase activating protein [Source:RGD Symbol;Acc:1308618]
ENSRNOG00000020358	2533.63	-0.0962756	0.0668584	-1.43999	0.14987	0.215535	ENSRNOG00000020358	Ptov1	PTOV1, extended AT-hook containing adaptor protein [Source:RGD Symbol;Acc:1306977]
ENSRNOG00000064667	60.5573	0.916592	0.245577	3.7324	0.000189666	0.00054787	ENSRNOG00000064667	Tmem86b	transmembrane protein 86B [Source:RGD Symbol;Acc:1593455]
ENSRNOG00000053502	2409.53	-0.177279	0.0562396	-3.15221	0.00162042	0.00390089	ENSRNOG00000053502	Arhgef17	Rho guanine nucleotide exchange factor 17 [Source:RGD Symbol;Acc:1309890]
ENSRNOG00000021442	224.562	-0.29164	0.110841	-2.63115	0.00850953	0.0174554	ENSRNOG00000021442	Hddc2	HD domain containing 2 [Source:RGD Symbol;Acc:1307562]
ENSRNOG00000066023	491.307	0.641482	0.093414	6.86709	6.5523e-12	5.51891e-11	ENSRNOG00000066023
ENSRNOG00000014278	673.084	0.155696	0.0794561	1.95952	0.0500522	0.0835795	ENSRNOG00000014278	Zfp710	zinc finger protein 710 [Source:RGD Symbol;Acc:1306491]
ENSRNOG00000049605	22.9454	-0.663791	0.331226	-2.00404	0.0450658	0.0762083	ENSRNOG00000049605	Zfp296	zinc finger protein 296 [Source:RGD Symbol;Acc:1595818]
ENSRNOG00000022921	297.625	-0.327688	0.126188	-2.59683	0.0094089	0.0190899	ENSRNOG00000022921	Dact2	dishevelled-binding antagonist of beta-catenin 2 [Source:RGD Symbol;Acc:1310742]
ENSRNOG00000037360	40.8999	0.105899	0.241695	0.438153	0.661276	0.734015	ENSRNOG00000037360	AABR07003173.1
ENSRNOG00000020624	2229.91	0.63063	0.0650471	9.69498	3.16699e-22	8.15388e-21	ENSRNOG00000020624	Acadsb	acyl-CoA dehydrogenase, short/branched chain [Source:RGD Symbol;Acc:2013]
ENSRNOG00000013981	237.989	0.197877	0.42509	0.465494	0.641578	0.716698	ENSRNOG00000013981	Ptpn5	protein tyrosine phosphatase, non-receptor type 5 [Source:RGD Symbol;Acc:3448]
ENSRNOG00000065346	72.3315	0.223859	0.265973	0.841658	0.399979	0.489887	ENSRNOG00000065346
ENSRNOG00000059083	62.0718	-0.0319698	0.311718	-0.10256	0.918312	0.939865	ENSRNOG00000059083	LOC120100370	small nucleolar RNA SNORA44 [Source:RGD Symbol;Acc:41111402]
ENSRNOG00000030818	806.112	0.305307	0.0621307	4.91396	8.92563e-07	3.77209e-06	ENSRNOG00000030818	C1h11orf42	similar to human chromosome 11 open reading frame 42 [Source:RGD Symbol;Acc:1561034]
ENSRNOG00000064515	1356.84	0.117368	0.0628184	1.86838	0.0617095	0.100401	ENSRNOG00000064515
ENSRNOG00000017930	1007.11	-0.0966675	0.0570652	-1.69398	0.0902681	0.139728	ENSRNOG00000017930	Lpcat1	lysophosphatidylcholine acyltransferase 1 [Source:RGD Symbol;Acc:1311599]
ENSRNOG00000063371	273.744	-0.159951	0.0993143	-1.61056	0.107276	0.1623	ENSRNOG00000063371
ENSRNOG00000068809	263.139	-0.0606777	0.0942885	-0.643532	0.519879	0.608588	ENSRNOG00000068809
ENSRNOG00000019869	373.975	-0.402114	0.101212	-3.973	7.09728e-05	0.000222111	ENSRNOG00000019869	Lrfn1	leucine rich repeat and fibronectin type III domain containing 1 [Source:RGD Symbol;Acc:1304707]
ENSRNOG00000067318	214.637	-0.164759	0.117641	-1.40052	0.161357	0.229618	ENSRNOG00000067318
ENSRNOG00000023411	276.448	-0.167857	0.108458	-1.54767	0.121701	0.180993	ENSRNOG00000023411	Vsig10l	V-set and immunoglobulin domain containing 10 like [Source:RGD Symbol;Acc:1564982]
ENSRNOG00000046005	75602.7	0.0210572	0.0563111	0.373944	0.708446	0.772788	ENSRNOG00000046005	Scd2	stearoyl-Coenzyme A desaturase 2 [Source:RGD Symbol;Acc:621177]
ENSRNOG00000018686	4264.74	0.443712	0.0733954	6.04551	1.48941e-09	9.40335e-09	ENSRNOG00000018686	Atxn2l	ataxin 2-like [Source:RGD Symbol;Acc:1565868]
ENSRNOG00000063261	217.91	-0.322299	0.11732	-2.74719	0.00601086	0.0128144	ENSRNOG00000063261
ENSRNOG00000069563	30.4443	-0.122766	0.279154	-0.439777	0.660099	0.732989	ENSRNOG00000069563
ENSRNOG00000017408	677.535	-0.005399	0.0829361	-0.0650983	0.948096	0.962374	ENSRNOG00000017408	Fhip1b	FHF complex subunit HOOK interacting protein 1B [Source:RGD Symbol;Acc:1359585]
ENSRNOG00000021794	173.801	-0.799302	0.147723	-5.4108	6.27448e-08	3.13853e-07	ENSRNOG00000021794	Znhit2	zinc finger, HIT-type containing 2 [Source:RGD Symbol;Acc:1307918]
ENSRNOG00000069938	25.9554	0.35349	0.299809	1.17905	0.238379	0.319317	ENSRNOG00000069938
ENSRNOG00000013949	1575.57	0.0360678	0.0517657	0.69675	0.485959	0.575768	ENSRNOG00000013949	Idh2	isocitrate dehydrogenase (NADP(+)) 2 [Source:RGD Symbol;Acc:1597139]
ENSRNOG00000065858	263.23	0.595309	0.131803	4.51666	6.28214e-06	2.34386e-05	ENSRNOG00000065858
ENSRNOG00000016103	86.7316	-0.15621	0.18586	-0.840468	0.400646	0.490496	ENSRNOG00000016103	Nkd2	NKD inhibitor of WNT signaling pathway 2 [Source:RGD Symbol;Acc:1311459]
ENSRNOG00000020643	1058.01	-0.409554	0.0554732	-7.38291	1.54868e-13	1.57703e-12	ENSRNOG00000020643	Bub3	BUB3 mitotic checkpoint protein [Source:RGD Symbol;Acc:1306654]
ENSRNOG00000064778	40.1359	3.25024	0.356846	9.10824	8.37261e-20	1.67004e-18	ENSRNOG00000064778
ENSRNOG00000058790	2519.31	0.0942156	0.0489164	1.92605	0.0540975	0.0894908	ENSRNOG00000058790	Fam120b	family with sequence similarity 120B [Source:RGD Symbol;Acc:1310304]
ENSRNOG00000020371	110.006	-0.249878	0.146077	-1.71059	0.0871565	0.135547	ENSRNOG00000020371	Pgap2	post-GPI attachment to proteins 2 [Source:RGD Symbol;Acc:619744]
ENSRNOG00000014996	191.766	-0.0811395	0.122512	-0.662298	0.50778	0.596705	ENSRNOG00000014996	Katna1	katanin catalytic subunit A1 [Source:RGD Symbol;Acc:1303062]
ENSRNOG00000067296	804.082	0.296524	0.0622419	4.76406	1.89734e-06	7.6766e-06	ENSRNOG00000067296	LOC108348090	zinc finger protein OZF-like [Source:RGD Symbol;Acc:11436011]
ENSRNOG00000017914	76.3658	-0.81662	0.178275	-4.58069	4.63445e-06	1.76725e-05	ENSRNOG00000017914	Cavin3	caveolae associated protein 3 [Source:RGD Symbol;Acc:628755]
ENSRNOG00000070027	126.54	-0.495585	0.150584	-3.29108	0.000998037	0.00250952	ENSRNOG00000070027
ENSRNOG00000016812	59.4117	0.16616	0.293906	0.56535	0.571836	0.655584	ENSRNOG00000016812	Adamts16	ADAM metallopeptidase with thrombospondin type 1 motif, 16 [Source:RGD Symbol;Acc:1310046]
ENSRNOG00000009932	45.1562	0.553955	0.236775	2.33958	0.0193054	0.0359955	ENSRNOG00000009932	Mctp2	multiple C2 and transmembrane domain containing 2 [Source:RGD Symbol;Acc:1562967]
ENSRNOG00000020865	56.1254	0.071905	0.236557	0.303965	0.761155	0.816362	ENSRNOG00000020865	Ano1	anoctamin 1 [Source:RGD Symbol;Acc:1310786]
ENSRNOG00000020714	66.0458	0.0368699	0.202142	0.182396	0.855272	0.892335	ENSRNOG00000020714	Trpm4	transient receptor potential cation channel, subfamily M, member 4 [Source:RGD Symbol;Acc:620244]
ENSRNOG00000015825	1395.41	0.369957	0.0754252	4.90495	9.34507e-07	3.93675e-06	ENSRNOG00000015825	Aurkc	aurora kinase C [Source:RGD Symbol;Acc:1309573]
ENSRNOG00000014840	106.447	0.235553	0.216169	1.08967	0.275858	0.360812	ENSRNOG00000014840	Gna14	G protein subunit alpha 14 [Source:RGD Symbol;Acc:1308122]
ENSRNOG00000064970	240.357	0.386966	0.108265	3.57423	0.000351258	0.000966391	ENSRNOG00000064970	Zfp939	zinc finger protein 939 [Source:RGD Symbol;Acc:1584032]
ENSRNOG00000030127	1391.13	-0.0618389	0.079367	-0.779152	0.43589	0.526051	ENSRNOG00000030127	Eml2	EMAP like 2 [Source:RGD Symbol;Acc:621066]
ENSRNOG00000066099	74.5321	1.64141	0.93063	1.76377	0.077771	0.122658	ENSRNOG00000066099
ENSRNOG00000027098	8164.16	-0.173046	0.0478289	-3.61802	0.000296869	0.000826148	ENSRNOG00000027098	Sez6l2	seizure related 6 homolog like 2 [Source:RGD Symbol;Acc:1565281]
ENSRNOG00000017311	854.494	-0.0804201	0.10216	-0.787194	0.431169	0.521446	ENSRNOG00000017311	Me3	malic enzyme 3 [Source:RGD Symbol;Acc:1311070]
ENSRNOG00000019270	31.0547	-0.569449	0.253319	-2.24796	0.024579	0.0446755	ENSRNOG00000019270	P2ry6	pyrimidinergic receptor P2Y6 [Source:RGD Symbol;Acc:620269]
ENSRNOG00000066986	368.307	0.318799	0.0995624	3.20201	0.00136474	0.00333625	ENSRNOG00000066986	Zfp619	zinc finger protein 619 [Source:RGD Symbol;Acc:7710512]
ENSRNOG00000018762	74.0609	0.00370717	0.164813	0.0224932	0.982055	0.987269	ENSRNOG00000018762	Rsph3	radial spoke head 3 [Source:RGD Symbol;Acc:1311306]
ENSRNOG00000067989	203.652	2.80073	0.2838	9.86868	5.69099e-23	1.57108e-21	ENSRNOG00000067989
ENSRNOG00000015956	1525.32	0.10312	0.0636385	1.6204	0.105147	0.159611	ENSRNOG00000015956	Usp29	ubiquitin specific peptidase 29 [Source:RGD Symbol;Acc:1306648]
ENSRNOG00000018019	3041.52	0.0494471	0.0394851	1.2523	0.210461	0.288013	ENSRNOG00000018019	Hspa12a	heat shock protein family A (Hsp70) member 12A [Source:RGD Symbol;Acc:1305531]
ENSRNOG00000069855	54.8271	1.50499	0.335534	4.48537	7.27886e-06	2.68606e-05	ENSRNOG00000069855
ENSRNOG00000016372	90.0774	-0.22617	0.160984	-1.40492	0.160045	0.228023	ENSRNOG00000016372	Slc12a7	solute carrier family 12 member 7 [Source:RGD Symbol;Acc:1359672]
ENSRNOG00000063775	69.9956	1.71916	0.261082	6.58475	4.55658e-11	3.48794e-10	ENSRNOG00000063775	LOC102546375	uncharacterized LOC102546375 [Source:RGD Symbol;Acc:7693175]
ENSRNOG00000064277	31.352	1.09554	0.326679	3.35356	0.000797798	0.00204607	ENSRNOG00000064277
ENSRNOG00000068327	447.533	-0.512975	0.0831281	-6.1709	6.79036e-10	4.47178e-09	ENSRNOG00000068327	Pdcd5	programmed cell death 5 [Source:RGD Symbol;Acc:1310561]
ENSRNOG00000019812	1139.48	-0.353029	0.111356	-3.17028	0.0015229	0.00368568	ENSRNOG00000019812	Nr1h2	nuclear receptor subfamily 1, group H, member 2 [Source:RGD Symbol;Acc:61906]
ENSRNOG00000070842	74.8287	-0.0511115	0.176207	-0.290065	0.771767	0.824395	ENSRNOG00000070842
ENSRNOG00000025940	1139.5	-0.195192	0.0692543	-2.81848	0.00482509	0.0105409	ENSRNOG00000025940	Mettl9	methyltransferase like 9 [Source:RGD Symbol;Acc:2311609]
ENSRNOG00000020393	696.124	-0.387781	0.090613	-4.27953	1.87287e-05	6.45526e-05	ENSRNOG00000020393	Rhog	ras homolog family member G [Source:RGD Symbol;Acc:621310]
ENSRNOG00000067076	322.12	-0.578731	0.0917488	-6.30778	2.83073e-10	1.96675e-09	ENSRNOG00000067076	Frat1	FRAT regulator of WNT signaling pathway 1 [Source:RGD Symbol;Acc:9147096]
ENSRNOG00000014969	721.178	-0.378036	0.0912231	-4.14409	3.41172e-05	0.000112646	ENSRNOG00000014969	Lzts2	leucine zipper tumor suppressor 2 [Source:RGD Symbol;Acc:1359249]
ENSRNOG00000067278	365.844	-0.0953716	0.0950762	-1.00311	0.315809	0.403215	ENSRNOG00000067278	LOC108349532	high mobility group protein B1 pseudogene [Source:RGD Symbol;Acc:11382437]
ENSRNOG00000010308	162.02	0.224164	0.182703	1.22693	0.219851	0.298835	ENSRNOG00000010308	Nr2f2	nuclear receptor subfamily 2, group F, member 2 [Source:RGD Symbol;Acc:69305]
ENSRNOG00000017277	23.2389	1.15308	0.336475	3.42694	0.000610425	0.00160405	ENSRNOG00000017277	Igsf6	immunoglobulin superfamily, member 6 [Source:RGD Symbol;Acc:620663]
ENSRNOG00000013426	1129.17	-0.310564	0.0931258	-3.33489	0.000853328	0.00217482	ENSRNOG00000013426	Mrgprf	MAS related GPR family member F [Source:RGD Symbol;Acc:708478]
ENSRNOG00000017851	118.56	-0.590009	0.136843	-4.31158	1.62095e-05	5.64863e-05	ENSRNOG00000017851	Etfb	electron transfer flavoprotein subunit beta [Source:RGD Symbol;Acc:1303312]
ENSRNOG00000068788	23.0338	0.823881	0.3501	2.35327	0.018609	0.0348357	ENSRNOG00000068788
ENSRNOG00000011439	450.115	0.268533	0.107783	2.49143	0.0127232	0.0250056	ENSRNOG00000011439	Grk5	G protein-coupled receptor kinase 5 [Source:RGD Symbol;Acc:61985]
ENSRNOG00000017635	6488.15	-0.192578	0.0767184	-2.5102	0.0120664	0.0238455	ENSRNOG00000017635	Inpp5a	inositol polyphosphate-5-phosphatase A [Source:RGD Symbol;Acc:1306168]
ENSRNOG00000056397	49.1382	0.412557	0.223644	1.8447	0.0650806	0.105121	ENSRNOG00000056397	LOC120100233	small nucleolar RNA SNORD22 [Source:RGD Symbol;Acc:40941034]
ENSRNOG00000068081	434.148	0.271696	0.0976444	2.7825	0.00539414	0.0116197	ENSRNOG00000068081
ENSRNOG00000065098	1309.73	-0.0185441	0.0608488	-0.304756	0.760552	0.815896	ENSRNOG00000065098	Hmgb1-ps4	high-mobility group box 1, pseudogene 4 [Source:RGD Symbol;Acc:1596834]
ENSRNOG00000029394	1277.64	-0.0903416	0.0662349	-1.36396	0.172581	0.24274	ENSRNOG00000029394	Dusp8	dual specificity phosphatase 8 [Source:RGD Symbol;Acc:1306425]
ENSRNOG00000017884	48.1841	0.0702792	0.203004	0.346196	0.729195	0.790551	ENSRNOG00000017884	Dnajb6-ps10	DnaJ heat shock protein family (Hsp40) member B6, pseudogene 10 [Source:RGD Symbol;Acc:1583989]
ENSRNOG00000064417	138.744	0.177862	0.14672	1.21225	0.225415	0.304857	ENSRNOG00000064417
ENSRNOG00000021082	1308.66	-0.278399	0.0599872	-4.64098	3.46764e-06	1.35033e-05	ENSRNOG00000021082	Kdelr1	KDEL endoplasmic reticulum protein retention receptor 1 [Source:RGD Symbol;Acc:1306764]
ENSRNOG00000066269	160.032	0.981203	0.152062	6.45267	1.09894e-10	8.05944e-10	ENSRNOG00000066269
ENSRNOG00000020197	65.4278	-0.726439	0.206735	-3.51387	0.000441631	0.00119199	ENSRNOG00000020197	Cd248	endosialin [Source:RGD Symbol;Acc:11367424]
ENSRNOG00000016687	85.9876	0.354425	0.194095	1.82604	0.0678447	0.108991	ENSRNOG00000016687	Ssc5d	scavenger receptor cysteine rich family member with 5 domains [Source:RGD Symbol;Acc:1565772]
ENSRNOG00000059984	91.4627	-0.125943	0.167025	-0.754038	0.450827	0.541163	ENSRNOG00000059984	Dll1	delta like canonical Notch ligand 1 [Source:RGD Symbol;Acc:70949]
ENSRNOG00000055124	24.674	0.512212	0.329581	1.55413	0.120154	0.179078	ENSRNOG00000055124	AABR07001942.1
ENSRNOG00000020363	1200.75	-0.254734	0.0816935	-3.11817	0.00181978	0.00433765	ENSRNOG00000020363	Med25	mediator complex subunit 25 [Source:RGD Symbol;Acc:1305137]
ENSRNOG00000020871	201.623	-0.221423	0.142525	-1.55358	0.120286	0.179237	ENSRNOG00000020871	Ltbp4	latent transforming growth factor beta binding protein 4 [Source:RGD Symbol;Acc:1307033]
ENSRNOG00000033843	25.084	-0.229324	0.318863	-0.719191	0.472023	0.562377	ENSRNOG00000033843	AABR07007121.1
ENSRNOG00000021151	410.545	-0.375161	0.0780671	-4.80563	1.54268e-06	6.31732e-06	ENSRNOG00000021151	Ppp1r14b	protein phosphatase 1, regulatory (inhibitor) subunit 14B [Source:RGD Symbol;Acc:628702]
ENSRNOG00000018310	76.6312	0.373605	0.209384	1.78431	0.0743735	0.11794	ENSRNOG00000018310	Eno4	enolase 4 [Source:RGD Symbol;Acc:1308333]
ENSRNOG00000030404	819.196	0.532298	0.0864902	6.15444	7.53453e-10	4.92389e-09	ENSRNOG00000030404	Arrb1	arrestin, beta 1 [Source:RGD Symbol;Acc:2156]
ENSRNOG00000067564	472.447	0.554224	0.0799439	6.93266	4.12991e-12	3.56119e-11	ENSRNOG00000067564
ENSRNOG00000014004	2004.48	0.324245	0.0527822	6.14307	8.09427e-10	5.27307e-09	ENSRNOG00000014004	Ncoa7	nuclear receptor coactivator 7 [Source:RGD Symbol;Acc:1566426]
ENSRNOG00000047816	563.735	-0.400962	0.0733651	-5.4653	4.62126e-08	2.3554e-07	ENSRNOG00000047816	Ccs	copper chaperone for superoxide dismutase [Source:RGD Symbol;Acc:620403]
ENSRNOG00000018433	287.348	-0.312342	0.0838479	-3.7251	0.000195235	0.00056239	ENSRNOG00000018433	Hps6	HPS6, biogenesis of lysosomal organelles complex 2 subunit 3 [Source:RGD Symbol;Acc:631341]
ENSRNOG00000020925	419.829	-0.27086	0.0735223	-3.68405	0.000229553	0.000651613	ENSRNOG00000020925	Ccdc86	coiled-coil domain containing 86 [Source:RGD Symbol;Acc:1359280]
ENSRNOG00000064594	251.825	0.669344	0.125838	5.31908	1.04296e-07	5.04659e-07	ENSRNOG00000064594
ENSRNOG00000070917	29.1228	0.686736	0.321636	2.13513	0.03275	0.0575673	ENSRNOG00000070917	LOC102556098	zinc finger protein 729-like [Source:RGD Symbol;Acc:7732163]
ENSRNOG00000012140	284.322	0.104628	0.112149	0.932943	0.35085	0.439538	ENSRNOG00000012140	Cep89	centrosomal protein 89 [Source:RGD Symbol;Acc:1311730]
ENSRNOG00000014828	407.197	-0.545131	0.0883668	-6.16896	6.874e-10	4.51662e-09	ENSRNOG00000014828	Avpi1	arginine vasopressin-induced 1 [Source:RGD Symbol;Acc:621721]
ENSRNOG00000020497	2637.99	0.484754	0.0565244	8.57602	9.82095e-18	1.59341e-16	ENSRNOG00000020497	Plekha1	pleckstrin homology domain containing A1 [Source:RGD Symbol;Acc:1564153]
ENSRNOG00000070030	57.3799	0.0486844	0.215439	0.225978	0.821218	0.86519	ENSRNOG00000070030
ENSRNOG00000025154	599.938	-0.105299	0.0690574	-1.52481	0.127306	0.188059	ENSRNOG00000025154	Snu13	NHP2 non-histone chromosome protein 2-like 1-like [Source:RGD Symbol;Acc:2323620]
ENSRNOG00000014448	1102.93	-0.262696	0.108012	-2.43211	0.0150113	0.0288905	ENSRNOG00000014448	Bmal1	basic helix-loop-helix ARNT like 1 [Source:RGD Symbol;Acc:62003]
ENSRNOG00000015753	4691.49	-0.590145	0.0688926	-8.56616	1.06996e-17	1.72632e-16	ENSRNOG00000015753	Epn1	Epsin 1 [Source:RGD Symbol;Acc:619772]
ENSRNOG00000067461	31.4515	0.593595	0.271078	2.18975	0.0285421	0.0510402	ENSRNOG00000067461	Rps12l2	ribosomal protein S12-like 2 [Source:RGD Symbol;Acc:2321899]
ENSRNOG00000028781	76.4976	0.393051	0.186216	2.11073	0.0347956	0.0607803	ENSRNOG00000028781	Abcc6	ATP binding cassette subfamily C member 6 [Source:RGD Symbol;Acc:620268]
ENSRNOG00000064885	198.348	0.203768	0.133847	1.5224	0.127908	0.188775	ENSRNOG00000064885
ENSRNOG00000054561	22.8819	0.244518	0.332541	0.735302	0.462156	0.552661	ENSRNOG00000054561	Isg20	interferon stimulated exonuclease gene 20 [Source:RGD Symbol;Acc:1306407]
ENSRNOG00000065383	75.4634	0.725836	0.197933	3.66708	0.000245333	0.00069255	ENSRNOG00000065383
ENSRNOG00000063169	19.2612	0.48258	0.379334	1.27218	0.20331	0.279148	ENSRNOG00000063169	LOC102548076	zinc finger protein 120-like [Source:RGD Symbol;Acc:7716527]
ENSRNOG00000069489	45.0409	0.0836054	0.225517	0.370728	0.71084	0.774585	ENSRNOG00000069489
ENSRNOG00000019491	1185.99	-0.42926	0.0666852	-6.43711	1.21771e-10	8.88117e-10	ENSRNOG00000019491	Stard10	StAR-related lipid transfer domain containing 10 [Source:RGD Symbol;Acc:1306548]
ENSRNOG00000019626	32.1158	0.191097	0.306735	0.623003	0.533282	0.620795	ENSRNOG00000019626	Slc27a5	solute carrier family 27 member 5 [Source:RGD Symbol;Acc:708535]
ENSRNOG00000064994	21.0281	0.86034	0.327495	2.62703	0.00861333	0.0176559	ENSRNOG00000064994
ENSRNOG00000031381	145.883	-0.10549	0.148495	-0.710398	0.477457	0.567594	ENSRNOG00000031381	RGD1561333	similar to 60S ribosomal protein L8 [Source:RGD Symbol;Acc:1561333]
ENSRNOG00000021153	1436.19	-0.572073	0.0597647	-9.57209	1.04765e-21	2.55251e-20	ENSRNOG00000021153	Fkbp2	FKBP prolyl isomerase 2 [Source:RGD Symbol;Acc:1560660]
ENSRNOG00000037137	799.654	0.317368	0.0735016	4.31784	1.57564e-05	5.50395e-05	ENSRNOG00000037137	Svip	small VCP interacting protein [Source:RGD Symbol;Acc:1565432]
ENSRNOG00000014380	712.772	0.391998	0.0896868	4.37075	1.23823e-05	4.40154e-05	ENSRNOG00000014380	LOC102555672	zinc finger protein 850-like [Source:RGD Symbol;Acc:7701959]
ENSRNOG00000017150	285.368	-0.44389	0.105752	-4.19748	2.69906e-05	9.05153e-05	ENSRNOG00000017150	Med10	mediator complex subunit 10 [Source:RGD Symbol;Acc:1310128]
ENSRNOG00000063014	32.7919	0.372763	0.266212	1.40025	0.161439	0.229649	ENSRNOG00000063014
ENSRNOG00000020517	37.0444	-0.0681435	0.243043	-0.280376	0.779189	0.830674	ENSRNOG00000020517	Prrg2	proline rich and Gla domain 2 [Source:RGD Symbol;Acc:1305444]
ENSRNOG00000062805	186.165	-0.209207	0.134998	-1.5497	0.121212	0.180415	ENSRNOG00000062805	Or14c39	olfactory receptor family 14 subfamily C member 39 [Source:RGD Symbol;Acc:1333763]
ENSRNOG00000015717	408.932	0.187117	0.101272	1.84767	0.0646505	0.104554	ENSRNOG00000015717	Ptpre	protein tyrosine phosphatase, receptor type, E [Source:RGD Symbol;Acc:620771]
ENSRNOG00000015914	3253.14	-0.0443424	0.0387984	-1.1429	0.253082	0.335954	ENSRNOG00000015914	U2af2	U2 small nuclear RNA auxiliary factor 2 [Source:RGD Symbol;Acc:1310690]
ENSRNOG00000019141	27.9757	-0.659782	0.328199	-2.01031	0.0443983	0.0751758	ENSRNOG00000019141	Ch25h	cholesterol 25-hydroxylase [Source:RGD Symbol;Acc:1310575]
ENSRNOG00000067799	177.046	0.343733	0.139493	2.46416	0.0137336	0.0267143	ENSRNOG00000067799	Selenow	selenoprotein W [Source:RGD Symbol;Acc:3661]
ENSRNOG00000019582	2148.72	0.0036268	0.0652154	0.0556126	0.95565	0.96805	ENSRNOG00000019582	Mthfd1l	methylenetetrahydrofolate dehydrogenase (NADP+ dependent) 1-like [Source:RGD Symbol;Acc:1307311]
ENSRNOG00000036711	243.753	0.146128	0.164537	0.888113	0.37448	0.46378	ENSRNOG00000036711	Spn	sialophorin [Source:RGD Symbol;Acc:3750]
ENSRNOG00000013149	684.355	-0.0608039	0.0809334	-0.751284	0.452482	0.542836	ENSRNOG00000013149	Vps33b	VPS33B, late endosome and lysosome associated [Source:RGD Symbol;Acc:620644]
ENSRNOG00000018048	1325.71	-0.15889	0.0540972	-2.93712	0.00331279	0.007493	ENSRNOG00000018048	Dctn5	dynactin subunit 5 [Source:RGD Symbol;Acc:1305654]
ENSRNOG00000010224	798.454	0.837963	0.0928969	9.02035	1.87486e-19	3.62032e-18	ENSRNOG00000010224	Rab30	RAB30, member RAS oncogene family [Source:RGD Symbol;Acc:1309507]
ENSRNOG00000063596	39.0018	0.419809	0.25892	1.62138	0.104936	0.159341	ENSRNOG00000063596
ENSRNOG00000029043	1241.85	0.00944956	0.0585655	0.16135	0.871818	0.905296	ENSRNOG00000029043	Zfp790	zinc finger protein 790 [Source:RGD Symbol;Acc:1309815]
ENSRNOG00000017095	84.7779	0.7429	0.154864	4.79712	1.6096e-06	6.57653e-06	ENSRNOG00000017095	Dlat-ps1	dihydrolipoamide S-acetyltransferase, pseudogene 1 [Source:RGD Symbol;Acc:1583609]
ENSRNOG00000018421	145.296	-0.190008	0.127434	-1.49103	0.135954	0.19877	ENSRNOG00000018421	Aen	apoptosis enhancing nuclease [Source:RGD Symbol;Acc:1305051]
ENSRNOG00000019681	305.483	-0.140155	0.102701	-1.36468	0.172352	0.242512	ENSRNOG00000019681	Pold1	DNA polymerase delta 1, catalytic subunit [Source:RGD Symbol;Acc:621839]
ENSRNOG00000020202	1637.93	-0.385439	0.0564185	-6.83179	8.38621e-12	6.98258e-11	ENSRNOG00000020202	Asrgl1	asparaginase and isoaspartyl peptidase 1 [Source:RGD Symbol;Acc:708526]
ENSRNOG00000017613	1090.21	-0.0154201	0.0562537	-0.274116	0.783995	0.834572	ENSRNOG00000017613	Tent4a	terminal nucleotidyltransferase 4A [Source:RGD Symbol;Acc:1307356]
ENSRNOG00000055519	229.394	-0.111489	0.108034	-1.03198	0.302084	0.388707	ENSRNOG00000055519	Zfp790	zinc finger protein 790 [Source:RGD Symbol;Acc:1309815]
ENSRNOG00000011234	41.1941	0.0804172	0.23919	0.336206	0.736715	0.797157	ENSRNOG00000011234	Taf5l-ps1	TATA-box binding protein associated factor 5 like, pseudogene 1 [Source:RGD Symbol;Acc:1582831]
ENSRNOG00000015997	303.067	-0.204231	0.108669	-1.8794	0.0601905	0.098139	ENSRNOG00000015997	Ccdc106	coiled-coil domain containing 106 [Source:RGD Symbol;Acc:1566222]
ENSRNOG00000064983	45.7058	-0.122201	0.211264	-0.578426	0.562976	0.647882	ENSRNOG00000064983
ENSRNOG00000055020	179.513	0.577637	0.161673	3.57288	0.000353077	0.000970294	ENSRNOG00000055020	LOC679731	hypothetical protein LOC679731 [Source:RGD Symbol;Acc:1584810]
ENSRNOG00000066969	176.183	-0.0774819	0.125183	-0.618951	0.535949	0.623249	ENSRNOG00000066969	Zfp790	zinc finger protein 420-like [Source:RGD Symbol;Acc:150344952]
ENSRNOG00000014251	918.443	0.042993	0.0677061	0.634994	0.525432	0.613723	ENSRNOG00000014251	Capn5	calpain 5 [Source:RGD Symbol;Acc:620084]
ENSRNOG00000066794	192.245	0.0705225	0.121226	0.581743	0.56074	0.64623	ENSRNOG00000066794
ENSRNOG00000025539	1926.24	0.927531	0.0771998	12.0147	2.97547e-33	2.04771e-31	ENSRNOG00000025539	Vps13a	vacuolar protein sorting 13 homolog A [Source:RGD Symbol;Acc:1311340]
ENSRNOG00000066862	29.7064	0.992903	0.263942	3.76182	0.000168683	0.000491166	ENSRNOG00000066862
ENSRNOG00000012716	2869.91	0.246763	0.0612526	4.02861	5.61069e-05	0.000178551	ENSRNOG00000012716	Chd2	chromodomain helicase DNA binding protein 2 [Source:RGD Symbol;Acc:1310056]
ENSRNOG00000063182	493.665	-0.328896	0.0784337	-4.1933	2.74921e-05	9.2112e-05	ENSRNOG00000063182
ENSRNOG00000016011	147.082	0.500108	0.140262	3.56554	0.000363112	0.000995609	ENSRNOG00000016011	Plekhg1	pleckstrin homology and RhoGEF domain containing G1 [Source:RGD Symbol;Acc:1583676]
ENSRNOG00000020014	1339.66	-0.38289	0.0985461	-3.88539	0.000102165	0.000310298	ENSRNOG00000020014	Myh14	myosin heavy chain 14 [Source:RGD Symbol;Acc:1306821]
ENSRNOG00000055082	3404.61	-0.274719	0.0368704	-7.45092	9.26886e-14	9.676e-13	ENSRNOG00000055082	Maz	MYC associated zinc finger protein [Source:RGD Symbol;Acc:1594632]
ENSRNOG00000017960	1499.88	-0.183096	0.0609531	-3.00388	0.00266563	0.00614133	ENSRNOG00000017960	Deaf1	DEAF1 transcription factor [Source:RGD Symbol;Acc:620671]
ENSRNOG00000056062	173.165	0.104266	0.144915	0.719499	0.471834	0.562197	ENSRNOG00000056062	LOC100912787	zinc finger protein 850-like [Source:RGD Symbol;Acc:6485475]
ENSRNOG00000052256	677.782	-0.487036	0.070726	-6.88623	5.72906e-12	4.85649e-11	ENSRNOG00000052256	Dact3	dishevelled-binding antagonist of beta-catenin 3 [Source:RGD Symbol;Acc:1563892]
ENSRNOG00000011931	5853.24	0.0324367	0.0508146	0.638334	0.523256	0.611722	ENSRNOG00000011931	Smarca2	SWI/SNF related, matrix associated, actin dependent regulator of chromatin, subfamily a, member 2 [Source:RGD Symbol;Acc:1302988]
ENSRNOG00000037556	486.287	0.0373984	0.0793168	0.471507	0.637278	0.712937	ENSRNOG00000037556	Zfp420	zinc finger protein 420 [Source:RGD Symbol;Acc:2323829]
ENSRNOG00000052236	37.1844	0.687408	0.266511	2.57928	0.00990062	0.0199676	ENSRNOG00000052236	AABR07004992.1
ENSRNOG00000070848	437.728	0.00927684	0.0851014	0.109009	0.913195	0.936278	ENSRNOG00000070848	Zfp27	zinc finger protein 27 [Source:RGD Symbol;Acc:2318958]
ENSRNOG00000013160	940.995	0.338738	0.122095	2.77438	0.00553074	0.011882	ENSRNOG00000013160	Sash1	SAM and SH3 domain containing 1 [Source:RGD Symbol;Acc:1566017]
ENSRNOG00000024077	154.671	0.0558629	0.153869	0.363054	0.716564	0.779535	ENSRNOG00000024077	Fbxo5	F-box protein 5 [Source:RGD Symbol;Acc:1309405]
ENSRNOG00000069496	74.0447	0.166097	0.198098	0.83846	0.401772	0.491585	ENSRNOG00000069496
ENSRNOG00000020456	339.466	-0.469192	0.106547	-4.40362	1.06461e-05	3.8218e-05	ENSRNOG00000020456	Nucb2	nucleobindin 2 [Source:RGD Symbol;Acc:620888]
ENSRNOG00000019802	294.297	-0.601495	0.111005	-5.41864	6.00543e-08	3.0133e-07	ENSRNOG00000019802	Zfp428	zinc finger protein 428 [Source:RGD Symbol;Acc:1564862]
ENSRNOG00000065781	107.595	0.412108	0.915996	0.449901	0.652782	0.72692	ENSRNOG00000065781
ENSRNOG00000062668	23.2381	0.102577	0.352076	0.29135	0.770784	0.823648	ENSRNOG00000062668
ENSRNOG00000012806	1985.42	0.258593	0.0546265	4.73385	2.20304e-06	8.82004e-06	ENSRNOG00000012806	Rbbp6	RB binding protein 6, ubiquitin ligase [Source:RGD Symbol;Acc:1311964]
ENSRNOG00000070914	31.1355	-0.0715753	0.276946	-0.258445	0.796064	0.844756	ENSRNOG00000070914	Tmem238	transmembrane protein 238 [Source:RGD Symbol;Acc:1565210]
ENSRNOG00000019497	1587.74	-0.427099	0.0578786	-7.37922	1.59218e-13	1.61811e-12	ENSRNOG00000019497	Mrpl17	mitochondrial ribosomal protein L17 [Source:RGD Symbol;Acc:70943]
ENSRNOG00000045545	63.9618	-0.582101	0.213602	-2.72516	0.00642701	0.0135985	ENSRNOG00000045545	Eid2b	EP300 interacting inhibitor of differentiation 2B [Source:RGD Symbol;Acc:9381183]
ENSRNOG00000064214	1295.44	0.737354	0.0570504	12.9246	3.26992e-38	3.31925e-36	ENSRNOG00000064214
ENSRNOG00000037331	76.1308	0.108362	0.179901	0.602343	0.546946	0.633905	ENSRNOG00000037331	Cd33	CD33 molecule [Source:RGD Symbol;Acc:1596020]
ENSRNOG00000062784	85.0291	0.263982	0.183516	1.43847	0.150301	0.216061	ENSRNOG00000062784
ENSRNOG00000020774	823.881	0.487918	0.0630283	7.74125	9.84458e-15	1.1543e-13	ENSRNOG00000020774	Zfp420	zinc finger protein 383-like [Source:RGD Symbol;Acc:9160828]
ENSRNOG00000037897	3796.26	-0.516223	0.043605	-11.8386	2.46451e-32	1.56961e-30	ENSRNOG00000037897	Rps19	ribosomal protein S19 [Source:RGD Symbol;Acc:68440]
ENSRNOG00000016831	572.421	-0.443048	0.143405	-3.08949	0.00200503	0.00473415	ENSRNOG00000016831	Serpinh1	serpin family H member 1 [Source:RGD Symbol;Acc:69302]
ENSRNOG00000024280	51.926	0.268603	0.199961	1.34327	0.179183	0.250359	ENSRNOG00000024280	Ccdc170	coiled-coil domain containing 170 [Source:RGD Symbol;Acc:1310945]
ENSRNOG00000055683	40.5309	0.0847742	0.248363	0.341332	0.732853	0.793747	ENSRNOG00000055683	Cct7-ps1	chaperonin containing Tcp1, subunit 7 (eta), pseudogene 1 [Source:RGD Symbol;Acc:1562884]
ENSRNOG00000056228	447.907	0.378254	0.102209	3.70078	0.000214935	0.000613177	ENSRNOG00000056228	Atp10a	ATPase phospholipid transporting 10A (putative) [Source:RGD Symbol;Acc:1306150]
ENSRNOG00000028743	907.204	-0.683497	0.0965758	-7.07732	1.46972e-12	1.33386e-11	ENSRNOG00000028743	Gal3st3	galactose-3-O-sulfotransferase 3 [Source:RGD Symbol;Acc:1564991]
ENSRNOG00000067556	54.2964	-0.127564	0.225962	-0.564538	0.572388	0.656062	ENSRNOG00000067556
ENSRNOG00000028273	250.25	-0.332306	0.0996417	-3.33501	0.00085297	0.0021745	ENSRNOG00000028273	Tmem150b	transmembrane protein 150B [Source:RGD Symbol;Acc:1306181]
ENSRNOG00000023233	384.062	-0.163331	0.0924074	-1.76751	0.0771423	0.121786	ENSRNOG00000023233	Zfp658	zinc finger protein 658 [Source:RGD Symbol;Acc:7541917]
ENSRNOG00000034075	1470.43	-0.182838	0.0656918	-2.78328	0.00538131	0.0116006	ENSRNOG00000034075	Ube2ql1	ubiquitin-conjugating enzyme E2Q family-like 1 [Source:RGD Symbol;Acc:1598121]
ENSRNOG00000014341	1016.24	-0.0415515	0.0595736	-0.697481	0.485502	0.575367	ENSRNOG00000014341	Btbd10	BTB domain containing 10 [Source:RGD Symbol;Acc:1306301]
ENSRNOG00000069950	39.6772	0.0407603	0.287006	0.142019	0.887065	0.91628	ENSRNOG00000069950
ENSRNOG00000020543	549.913	-0.316362	0.0729748	-4.33522	1.45612e-05	5.11845e-05	ENSRNOG00000020543	Nosip	nitric oxide synthase interacting protein [Source:RGD Symbol;Acc:1309992]
ENSRNOG00000020298	416.712	-0.272061	0.0953388	-2.85362	0.00432238	0.00953299	ENSRNOG00000020298	Bag3	BAG cochaperone 3 [Source:RGD Symbol;Acc:1307794]
ENSRNOG00000018255	3835.48	-0.274037	0.0562381	-4.8728	1.10026e-06	4.60031e-06	ENSRNOG00000018255	Clptm1	CLPTM1 regulator of GABA type A receptor forward trafficking [Source:RGD Symbol;Acc:1310959]
ENSRNOG00000066399	295.216	-0.076071	0.0830998	-0.915416	0.359973	0.449224	ENSRNOG00000066399
ENSRNOG00000021000	176.869	0.0505175	0.110279	0.458089	0.646888	0.721464	ENSRNOG00000021000	Naaladl1	N-acetylated alpha-linked acidic dipeptidase-like 1 [Source:RGD Symbol;Acc:620987]
ENSRNOG00000062327	560.809	-0.220009	0.0770905	-2.8539	0.00431858	0.00952641	ENSRNOG00000062327
ENSRNOG00000070318	67.0519	-0.186985	0.205203	-0.911223	0.362178	0.451161	ENSRNOG00000070318
ENSRNOG00000033729	442.636	0.280387	0.0847347	3.30899	0.000936327	0.00236706	ENSRNOG00000033729	LOC102556967	zinc finger protein 484-like [Source:RGD Symbol;Acc:7510716]
ENSRNOG00000020716	909.81	-0.0871792	0.0728777	-1.19624	0.231603	0.311838	ENSRNOG00000020716	Axl	Axl receptor tyrosine kinase [Source:RGD Symbol;Acc:620028]
ENSRNOG00000011488	518.51	-0.489411	0.0877603	-5.57669	2.45145e-08	1.30489e-07	ENSRNOG00000011488	Sergef	secretion regulating guanine nucleotide exchange factor [Source:RGD Symbol;Acc:1563497]
ENSRNOG00000067525	26.1286	0.206245	0.411684	0.500978	0.616386	0.69532	ENSRNOG00000067525	LOC120099976	uncharacterized LOC120099976 [Source:RGD Symbol;Acc:41077508]
ENSRNOG00000015441	270.827	-0.16703	0.120511	-1.38601	0.165743	0.234805	ENSRNOG00000015441	Il4r	interleukin 4 receptor [Source:RGD Symbol;Acc:2899]
ENSRNOG00000020412	5479.8	-0.372861	0.0413499	-9.0172	1.92958e-19	3.72103e-18	ENSRNOG00000020412	Sf3b2	splicing factor 3b, subunit 2 [Source:RGD Symbol;Acc:1307159]
ENSRNOG00000016923	1875.97	-0.204434	0.0549819	-3.7182	0.000200645	0.000575919	ENSRNOG00000016923	Clptm1l	CLPTM1-like [Source:RGD Symbol;Acc:1307896]
ENSRNOG00000066567	50.8562	1.39692	0.287788	4.85398	1.21007e-06	5.03477e-06	ENSRNOG00000066567
ENSRNOG00000010938	705.984	-0.133993	0.0723218	-1.85273	0.0639213	0.10349	ENSRNOG00000010938	Slc7a10	solute carrier family 7 member 10 [Source:RGD Symbol;Acc:621672]
ENSRNOG00000065260	352.182	0.141678	0.0917154	1.54476	0.122405	0.181965	ENSRNOG00000065260
ENSRNOG00000011029	537.887	-0.335227	0.0733405	-4.57084	4.8578e-06	1.84757e-05	ENSRNOG00000011029	Sec11a	SEC11 homolog A, signal peptidase complex subunit [Source:RGD Symbol;Acc:69360]
ENSRNOG00000015239	366.642	-0.0738896	0.085079	-0.868482	0.38513	0.474677	ENSRNOG00000015239	Ginm1	glycosylated integral membrane protein 1 [Source:RGD Symbol;Acc:1309759]
ENSRNOG00000069539	522.44	-0.107975	0.0745839	-1.44769	0.147703	0.212883	ENSRNOG00000069539	Zfp74	zinc finger protein 74 [Source:RGD Symbol;Acc:1563223]
ENSRNOG00000018426	222.788	-0.310053	0.123699	-2.50651	0.0121931	0.0240793	ENSRNOG00000018426	Apoc1	apolipoprotein C1 [Source:RGD Symbol;Acc:2134]
ENSRNOG00000020110	1645.56	-0.318322	0.0579959	-5.4887	4.04892e-08	2.07901e-07	ENSRNOG00000020110	B4gat1	beta-1,4-glucuronyltransferase 1 [Source:RGD Symbol;Acc:1309541]
ENSRNOG00000012084	1619.24	-0.240382	0.0480219	-5.00567	5.56684e-07	2.42024e-06	ENSRNOG00000012084	Xpnpep1	X-prolyl aminopeptidase 1 [Source:RGD Symbol;Acc:621274]
ENSRNOG00000046652	301.864	0.56202	0.117612	4.77861	1.76515e-06	7.16571e-06	ENSRNOG00000046652	Zfp790	zinc finger protein 30 homolog [Source:RGD Symbol;Acc:11363847]
ENSRNOG00000013770	645.819	0.103544	0.0692247	1.49576	0.134716	0.197179	ENSRNOG00000013770	Folh1	folate hydrolase 1 [Source:RGD Symbol;Acc:70963]
ENSRNOG00000024961	665.707	0.0642822	0.0666863	0.963949	0.335072	0.423459	ENSRNOG00000024961	Usp35	ubiquitin specific peptidase 35 [Source:RGD Symbol;Acc:1565984]
ENSRNOG00000011672	62.0561	0.167579	0.229158	0.731283	0.464606	0.554997	ENSRNOG00000011672	Tph1	tryptophan hydroxylase 1 [Source:RGD Symbol;Acc:3895]
ENSRNOG00000017673	4383.94	-0.312754	0.0550336	-5.68296	1.32386e-08	7.32611e-08	ENSRNOG00000017673	Brsk1	BR serine/threonine kinase 1 [Source:RGD Symbol;Acc:1563268]
ENSRNOG00000032150	966.344	-0.249052	0.066126	-3.76633	0.000165666	0.000483058	ENSRNOG00000032150	Adcy2	adenylate cyclase 2 [Source:RGD Symbol;Acc:619965]
ENSRNOG00000018356	4617.7	-0.24345	0.0522338	-4.66078	3.1501e-06	1.23239e-05	ENSRNOG00000018356	Trim3	tripartite motif-containing 3 [Source:RGD Symbol;Acc:70074]
ENSRNOG00000023753	2883.63	0.419236	0.0516709	8.11358	4.91489e-16	6.68877e-15	ENSRNOG00000023753	Afdn	afadin, adherens junction formation factor [Source:RGD Symbol;Acc:708561]
ENSRNOG00000030932	683.829	-0.0316732	0.0608873	-0.520194	0.602928	0.68346	ENSRNOG00000030932	Zfp14	ZFP14 zinc finger protein [Source:RGD Symbol;Acc:1560188]
ENSRNOG00000018761	5196.07	-0.329221	0.0655416	-5.02308	5.08491e-07	2.22404e-06	ENSRNOG00000018761	Eif3c	eukaryotic translation initiation factor 3, subunit C [Source:RGD Symbol;Acc:1308871]
ENSRNOG00000062876	30.9333	-0.0378879	0.246956	-0.153419	0.878068	0.909964	ENSRNOG00000062876	LOC108349685	uncharacterized LOC108349685 [Source:RGD Symbol;Acc:11462351]
ENSRNOG00000030160	62.9188	0.112338	0.201213	0.558303	0.576638	0.659683	ENSRNOG00000030160	Zfp819	zinc finger protein 819 [Source:RGD Symbol;Acc:1309564]
ENSRNOG00000069633	56.0015	-0.0511176	0.188547	-0.271114	0.786304	0.836293	ENSRNOG00000069633	Itpripl2	ITPRIP like 2 [Source:RGD Symbol;Acc:1564255]
ENSRNOG00000032946	232.906	0.323236	0.146108	2.2123	0.0269458	0.0484618	ENSRNOG00000032946	Pdzd7	PDZ domain containing 7 [Source:RGD Symbol;Acc:1309882]
ENSRNOG00000012362	182.595	-0.217374	0.115394	-1.88376	0.0595978	0.0973154	ENSRNOG00000012362	Cacng3	calcium voltage-gated channel auxiliary subunit gamma 3 [Source:RGD Symbol;Acc:628803]
ENSRNOG00000014303	5871.53	-0.0913936	0.0493486	-1.852	0.0640257	0.103636	ENSRNOG00000014303	Lrp11	LDL receptor related protein 11 [Source:RGD Symbol;Acc:1308602]
ENSRNOG00000018454	19285	-0.29134	0.141854	-2.05381	0.0399945	0.0685667	ENSRNOG00000018454	Apoe	apolipoprotein E [Source:RGD Symbol;Acc:2138]
ENSRNOG00000020531	746.003	-0.420026	0.0637228	-6.59146	4.35526e-11	3.3444e-10	ENSRNOG00000020531	Fen1	flap structure-specific endonuclease 1 [Source:RGD Symbol;Acc:621821]
ENSRNOG00000019544	298.128	0.025945	0.106122	0.244482	0.806858	0.853714	ENSRNOG00000019544	Zbtb2	zinc finger and BTB domain containing 2 [Source:RGD Symbol;Acc:1306621]
ENSRNOG00000020477	82.6019	0.101774	0.17481	0.582196	0.560435	0.646084	ENSRNOG00000020477	LOC100911093	CCA tRNA nucleotidyltransferase 1, mitochondrial-like [Source:RGD Symbol;Acc:6494996]
ENSRNOG00000023549	44.5052	1.06892	0.256034	4.17491	2.98099e-05	9.91684e-05	ENSRNOG00000023549	Samd5	sterile alpha motif domain containing 5 [Source:RGD Symbol;Acc:1311012]
ENSRNOG00000021096	528.891	-0.3433	0.0809099	-4.24299	2.20561e-05	7.51294e-05	ENSRNOG00000021096	Tmem143	transmembrane protein 143 [Source:RGD Symbol;Acc:1305013]
ENSRNOG00000022796	213.061	-0.0730125	0.11391	-0.640964	0.521546	0.610116	ENSRNOG00000022796	Fgfbp3	fibroblast growth factor binding protein 3 [Source:RGD Symbol;Acc:1560326]
ENSRNOG00000029784	13101.1	-0.107311	0.080747	-1.32898	0.183856	0.255848	ENSRNOG00000029784	Pak1	p21 (RAC1) activated kinase 1 [Source:RGD Symbol;Acc:3250]
ENSRNOG00000018885	1366.68	0.41027	0.0706664	5.80573	6.40851e-09	3.71192e-08	ENSRNOG00000018885	Zfp780b	zinc finger protein 780B [Source:RGD Symbol;Acc:1592570]
ENSRNOG00000063852	758.08	-0.042043	0.0651094	-0.645729	0.518455	0.607234	ENSRNOG00000063852	Tmem80	transmembrane protein 80 [Source:RGD Symbol;Acc:1308399]
ENSRNOG00000048138	314.347	0.340017	0.100048	3.39852	0.000677504	0.00176689	ENSRNOG00000048138	Zfp566	zinc finger protein 566 [Source:RGD Symbol;Acc:1563239]
ENSRNOG00000019306	2262.13	-0.479778	0.070183	-6.8361	8.13753e-12	6.795e-11	ENSRNOG00000019306	Syt12	synaptotagmin 12 [Source:RGD Symbol;Acc:621876]
ENSRNOG00000018440	2015.4	-0.16273	0.0471284	-3.45291	0.000554572	0.0014722	ENSRNOG00000018440	Arfip2	ADP-ribosylation factor interacting protein 2 [Source:RGD Symbol;Acc:1303204]
ENSRNOG00000029082	201.168	-0.269102	0.114458	-2.35111	0.0187177	0.0350144	ENSRNOG00000029082	RGD1566189	similar to ferritin light chain [Source:RGD Symbol;Acc:1566189]
ENSRNOG00000021104	32.3778	-0.66569	0.290257	-2.29345	0.0218222	0.0401013	ENSRNOG00000021104	Emp3	epithelial membrane protein 3 [Source:RGD Symbol;Acc:621094]
ENSRNOG00000011451	2095.13	-0.35044	0.0612242	-5.72388	1.04118e-08	5.83517e-08	ENSRNOG00000011451	Lrp3	LDL receptor related protein 3 [Source:RGD Symbol;Acc:619729]
ENSRNOG00000017254	1404.01	-0.159478	0.052607	-3.03149	0.00243353	0.00564853	ENSRNOG00000017254	Nsun2	NOP2/Sun RNA methyltransferase 2 [Source:RGD Symbol;Acc:1311954]
ENSRNOG00000020117	643.318	-0.262084	0.068228	-3.84129	0.000122389	0.000366888	ENSRNOG00000020117	Brms1	BRMS1, transcriptional repressor and anoikis regulator [Source:RGD Symbol;Acc:1311057]
ENSRNOG00000050995	246.12	0.420451	0.100308	4.19158	2.77019e-05	9.27292e-05	ENSRNOG00000050995	Zfp780b	zinc finger protein 780B [Source:RGD Symbol;Acc:1592570]
ENSRNOG00000015503	920.29	-0.289102	0.0967806	-2.98719	0.00281554	0.00646088	ENSRNOG00000015503	Otud7a	OTU deubiquitinase 7A [Source:RGD Symbol;Acc:1563721]
ENSRNOG00000021003	185.175	-0.634995	0.137	-4.635	3.56943e-06	1.3881e-05	ENSRNOG00000021003	Sac3d1	SAC3 domain containing 1 [Source:RGD Symbol;Acc:1308049]
ENSRNOG00000020274	300.641	0.157447	0.116993	1.34579	0.178372	0.249484	ENSRNOG00000020274	Taf5	TATA-box binding protein associated factor 5 [Source:RGD Symbol;Acc:1311332]
ENSRNOG00000065528	45.0548	-0.191167	0.232663	-0.821647	0.411278	0.501273	ENSRNOG00000065528	St8sia2	ST8 alpha-N-acetyl-neuraminide alpha-2,8-sialyltransferase 2 [Source:RGD Symbol;Acc:621843]
ENSRNOG00000022701	45.1008	0.0513818	0.237525	0.216322	0.828737	0.870571	ENSRNOG00000022701	Ceacam18	CEA cell adhesion molecule 18 [Source:RGD Symbol;Acc:1563539]
ENSRNOG00000058039	163.522	-0.309744	0.201407	-1.5379	0.124073	0.184068	ENSRNOG00000058039	Acta2	actin alpha 2, smooth muscle [Source:RGD Symbol;Acc:621676]
ENSRNOG00000018556	1032.98	-0.300864	0.0794858	-3.78513	0.000153631	0.000450956	ENSRNOG00000018556	Tomm40	translocase of outer mitochondrial membrane 40 [Source:RGD Symbol;Acc:1303022]
ENSRNOG00000065206	21.3741	0.20073	0.326663	0.614485	0.538895	0.625973	ENSRNOG00000065206
ENSRNOG00000028137	127.438	0.217689	0.250479	0.86909	0.384798	0.474374	ENSRNOG00000028137	Mki67	marker of proliferation Ki-67 [Source:RGD Symbol;Acc:1305476]
ENSRNOG00000051102	158.17	-0.243048	0.123036	-1.97541	0.0482211	0.0808847	ENSRNOG00000051102	AABR07004269.3
ENSRNOG00000010983	29.4801	-0.114017	0.262106	-0.435002	0.663561	0.735933	ENSRNOG00000010983	Otog	otogelin [Source:RGD Symbol;Acc:1306610]
ENSRNOG00000020296	2042.63	-0.152996	0.0505689	-3.0255	0.00248224	0.00575242	ENSRNOG00000020296	Atp5mk	ATP synthase membrane subunit K [Source:RGD Symbol;Acc:631426]
ENSRNOG00000029805	591.213	0.818254	0.0853378	9.58841	8.94487e-22	2.19036e-20	ENSRNOG00000029805	Zfp780b	zinc finger protein 780B [Source:RGD Symbol;Acc:1592570]
ENSRNOG00000017601	604.572	-0.210171	0.0809859	-2.59516	0.0094547	0.0191614	ENSRNOG00000017601	Srd5a1	steroid 5 alpha-reductase 1 [Source:RGD Symbol;Acc:3757]
ENSRNOG00000016090	618.153	0.296015	0.0740696	3.99645	6.42995e-05	0.000202756	ENSRNOG00000016090	Mtmr10	myotubularin related protein 10 [Source:RGD Symbol;Acc:1305958]
ENSRNOG00000045560	21.1523	1.5898	0.378115	4.20455	2.61606e-05	8.79284e-05	ENSRNOG00000045560	Gvin1	GTPase, very large interferon inducible 1 [Source:RGD Symbol;Acc:1598220]
ENSRNOG00000020651	1410.97	-0.168815	0.0609917	-2.76784	0.00564296	0.0120991	ENSRNOG00000020651	Cars1	cysteinyl-tRNA synthetase 1 [Source:RGD Symbol;Acc:1310747]
ENSRNOG00000065330	80.9876	-0.425669	0.186796	-2.27879	0.0226798	0.041551	ENSRNOG00000065330	Mrgpre	MAS related GPR family member E [Source:RGD Symbol;Acc:738045]
ENSRNOG00000016679	172.736	0.350103	0.13418	2.60921	0.00907512	0.0185032	ENSRNOG00000016679	Tmc7	transmembrane channel-like 7 [Source:RGD Symbol;Acc:1564267]
ENSRNOG00000018350	1336.42	0.0737362	0.0694965	1.06101	0.288687	0.373987	ENSRNOG00000018350	Shtn1	shootin 1 [Source:RGD Symbol;Acc:1311558]
ENSRNOG00000028992	39.4766	-0.224219	0.296423	-0.756415	0.4494	0.539853	ENSRNOG00000028992	Acan	aggrecan [Source:RGD Symbol;Acc:68358]
ENSRNOG00000019838	30.1676	-0.111914	0.299822	-0.37327	0.708948	0.77316	ENSRNOG00000019838	Gmfg	glia maturation factor, gamma [Source:RGD Symbol;Acc:620506]
ENSRNOG00000019549	6627.95	-0.044173	0.0856827	-0.515541	0.606175	0.686122	ENSRNOG00000019549	Akap12	A-kinase anchoring protein 12 [Source:RGD Symbol;Acc:70988]
ENSRNOG00000011151	249.138	0.605626	0.142867	4.23908	2.24438e-05	7.62889e-05	ENSRNOG00000011151	Tenm4	teneurin transmembrane protein 4 [Source:RGD Symbol;Acc:1304658]
ENSRNOG00000022189	27.127	-0.275335	0.316269	-0.870572	0.383988	0.473456	ENSRNOG00000022189	Htatip2	HIV-1 Tat interactive protein 2 [Source:RGD Symbol;Acc:1309941]
ENSRNOG00000020762	1366.76	-0.010173	0.0632555	-0.160824	0.872232	0.905461	ENSRNOG00000020762	Zfp260	zinc finger protein 260 [Source:RGD Symbol;Acc:621205]
ENSRNOG00000023318	275.531	-0.148501	0.103252	-1.43825	0.150365	0.216118	ENSRNOG00000023318	Tigd3	tigger transposable element derived 3 [Source:RGD Symbol;Acc:1305393]
ENSRNOG00000066701	81.2645	-0.690532	0.183426	-3.76463	0.000166797	0.000486261	ENSRNOG00000066701	LOC691427	similar to 6.8 kDa mitochondrial proteolipid [Source:RGD Symbol;Acc:1583946]
ENSRNOG00000053075	1065.21	-0.0901911	0.0596549	-1.51188	0.130564	0.192069	ENSRNOG00000053075	B4galnt4	beta-1,4-N-acetyl-galactosaminyl transferase 4 [Source:RGD Symbol;Acc:1310052]
ENSRNOG00000012874	1476.6	-0.384501	0.0718507	-5.35139	8.7279e-08	4.26353e-07	ENSRNOG00000012874	Rgma	repulsive guidance molecule BMP co-receptor a [Source:RGD Symbol;Acc:1311983]
ENSRNOG00000065214	212.373	-0.419902	0.178458	-2.35294	0.0186257	0.034858	ENSRNOG00000065214	LOC120097335	high mobility group nucleosome-binding domain-containing protein 5-like [Source:RGD Symbol;Acc:41304028]
ENSRNOG00000011895	347.601	0.116254	0.0869052	1.33771	0.180991	0.252538	ENSRNOG00000011895	Saal1	serum amyloid A-like 1 [Source:RGD Symbol;Acc:1587443]
ENSRNOG00000017659	35.1862	-0.00318624	0.309853	-0.0102831	0.991795	0.994058	ENSRNOG00000017659	Hs3st2	heparan sulfate-glucosamine 3-sulfotransferase 2 [Source:RGD Symbol;Acc:727787]
ENSRNOG00000020777	568.302	0.182991	0.0889859	2.05641	0.0397434	0.0682248	ENSRNOG00000020777	Zfp382	zinc finger protein 382 [Source:RGD Symbol;Acc:708385]
ENSRNOG00000016266	541.405	-0.337243	0.0799262	-4.21943	2.44925e-05	8.26915e-05	ENSRNOG00000016266	Mphosph10	M-phase phosphoprotein 10 [Source:RGD Symbol;Acc:1307633]
ENSRNOG00000017839	401.874	-0.333039	0.0831869	-4.0035	6.24122e-05	0.000197319	ENSRNOG00000017839	Ercc1	ERCC excision repair 1, endonuclease non-catalytic subunit [Source:RGD Symbol;Acc:1306992]
ENSRNOG00000017918	771.334	-0.139524	0.0927951	-1.50357	0.132691	0.194762	ENSRNOG00000017918	Iglon5	IgLON family member 5 [Source:RGD Symbol;Acc:1305344]
ENSRNOG00000016381	302.473	-0.00764398	0.0939955	-0.0813228	0.935185	0.951968	ENSRNOG00000016381	Ust	uronyl-2-sulfotransferase [Source:RGD Symbol;Acc:1304743]
ENSRNOG00000020736	261.174	0.0997946	0.124857	0.799272	0.424133	0.514522	ENSRNOG00000020736	Nadsyn1	NAD synthetase 1 [Source:RGD Symbol;Acc:727801]
ENSRNOG00000023985	537.802	0.211093	0.082724	2.55178	0.0107174	0.0214334	ENSRNOG00000023985	Fan1	FANCD2 and FANCI associated nuclease 1 [Source:RGD Symbol;Acc:1566323]
ENSRNOG00000019376	661.874	0.612272	0.0761795	8.03723	9.18936e-16	1.20432e-14	ENSRNOG00000019376	Zfp329	zinc finger protein 329 [Source:RGD Symbol;Acc:1565029]
ENSRNOG00000017456	42.923	-0.480084	0.225416	-2.12977	0.0331905	0.058271	ENSRNOG00000017456	Vstm2b	V-set and transmembrane domain containing 2B [Source:RGD Symbol;Acc:1306235]
ENSRNOG00000008815	436.993	-0.0250481	0.0843375	-0.296998	0.766468	0.820398	ENSRNOG00000008815	Fbxo46	F-box protein 46 [Source:RGD Symbol;Acc:1308393]
ENSRNOG00000016722	2314.3	0.127487	0.0466555	2.73252	0.00628527	0.0133394	ENSRNOG00000016722	Xpo6	exportin 6 [Source:RGD Symbol;Acc:1311491]
ENSRNOG00000048397	1079.43	-0.35182	0.0673158	-5.22641	1.72833e-07	8.12468e-07	ENSRNOG00000048397	Sephs2	selenophosphate synthetase 2 [Source:RGD Symbol;Acc:1308827]
ENSRNOG00000017728	1308.49	0.355673	0.0824421	4.31422	1.60167e-05	5.58681e-05	ENSRNOG00000017728	Edrf1	erythroid differentiation regulatory factor 1 [Source:RGD Symbol;Acc:1306820]
ENSRNOG00000067450	1337.25	-0.101142	0.0582519	-1.73629	0.0825118	0.129167	ENSRNOG00000067450	Zfp146	zinc finger protein 146 [Source:RGD Symbol;Acc:7630088]
ENSRNOG00000015552	801.12	-0.0490776	0.06099	-0.804684	0.421002	0.511579	ENSRNOG00000015552	Ppil4	peptidylprolyl isomerase like 4 [Source:RGD Symbol;Acc:1311051]
ENSRNOG00000016919	2692.13	-0.0352475	0.0499101	-0.706219	0.480052	0.569978	ENSRNOG00000016919	Scaf8	SR-related CTD-associated factor 8 [Source:RGD Symbol;Acc:708362]
ENSRNOG00000019106	4447.77	-0.598963	0.0569142	-10.524	6.7001e-26	2.4323e-24	ENSRNOG00000019106	Rps17	40S ribosomal protein S17-like [Source:RGD Symbol;Acc:2318277]
ENSRNOG00000010959	431.225	-0.394125	0.0927822	-4.24785	2.15829e-05	7.37047e-05	ENSRNOG00000010959	Klhl25	kelch-like family member 25 [Source:RGD Symbol;Acc:1310815]
ENSRNOG00000021474	27.8899	0.238274	0.350282	0.680233	0.496357	0.585698	ENSRNOG00000021474	Siglec5	sialic acid binding Ig-like lectin 5 [Source:RGD Symbol;Acc:1305432]
ENSRNOG00000028274	1481.75	0.113447	0.10831	1.04743	0.294902	0.380714	ENSRNOG00000028274	Myrf	myelin regulatory factor [Source:RGD Symbol;Acc:1306622]
ENSRNOG00000024410	352.93	-0.20107	0.0827524	-2.42978	0.0151078	0.0290455	ENSRNOG00000024410	Blvrb	biliverdin reductase B [Source:RGD Symbol;Acc:1306080]
ENSRNOG00000010017	858.711	0.381008	0.0669456	5.69131	1.26066e-08	7.00038e-08	ENSRNOG00000010017	Wee1	WEE1 G2 checkpoint kinase [Source:RGD Symbol;Acc:1307895]
ENSRNOG00000050015	47.1254	-0.290891	0.234357	-1.24123	0.214521	0.292603	ENSRNOG00000050015	Cox7a1	cytochrome c oxidase subunit 7A1 [Source:RGD Symbol;Acc:6496527]
ENSRNOG00000047692	145.211	0.70265	0.186101	3.77563	0.000159605	0.00046651	ENSRNOG00000047692	Hells	helicase, lymphoid specific [Source:RGD Symbol;Acc:1309820]
ENSRNOG00000065271	43.1054	0.492898	0.273081	1.80495	0.071082	0.113414	ENSRNOG00000065271	Fam174b	family with sequence similarity 174, member B [Source:RGD Symbol;Acc:1596692]
ENSRNOG00000020304	1572.91	0.276615	0.0712152	3.88421	0.000102662	0.000311678	ENSRNOG00000020304	Pdcd11	programmed cell death 11 [Source:RGD Symbol;Acc:1304933]
ENSRNOG00000017418	6814.18	-0.302452	0.0440051	-6.87312	6.28137e-12	5.30919e-11	ENSRNOG00000017418	Rps3	ribosomal protein S3 [Source:RGD Symbol;Acc:619888]
ENSRNOG00000012369	226.176	-0.00019315	0.150316	-0.00128496	0.998975	0.999181	ENSRNOG00000012369	Fam174b	family with sequence similarity 174, member B [Source:RGD Symbol;Acc:1596692]
ENSRNOG00000014450	1483.59	0.412026	0.0593549	6.94174	3.87298e-12	3.34759e-11	ENSRNOG00000014450	Shprh	SNF2 histone linker PHD RING helicase [Source:RGD Symbol;Acc:1310342]
ENSRNOG00000067065	3210.94	-0.139806	0.0618683	-2.25974	0.0238376	0.0434966	ENSRNOG00000067065	Capns1	calpain, small subunit 1 [Source:RGD Symbol;Acc:2270]
ENSRNOG00000037298	193.002	-0.042776	0.124545	-0.34346	0.731253	0.792309	ENSRNOG00000037298	C1h19orf81	simlar to human chromosome 19 open reading frame 81 [Source:RGD Symbol;Acc:1309036]
ENSRNOG00000016825	125.328	-0.142257	0.134487	-1.05778	0.290156	0.375592	ENSRNOG00000016825	Polr1g	RNA polymerase I subunit G [Source:RGD Symbol;Acc:1591707]
ENSRNOG00000024737	3677.98	0.605818	0.0539219	11.2351	2.74186e-29	1.38245e-27	ENSRNOG00000024737	Tnrc6a	trinucleotide repeat containing adaptor 6A [Source:RGD Symbol;Acc:1307268]
ENSRNOG00000013624	65.8552	0.961072	0.218576	4.39697	1.09771e-05	3.93672e-05	ENSRNOG00000013624	Uevld	UEV and lactate/malate dehyrogenase domains [Source:RGD Symbol;Acc:1587416]
ENSRNOG00000020325	219.768	-0.445129	0.111299	-3.99939	6.35071e-05	0.000200519	ENSRNOG00000020325	Calhm2	calcium homeostasis modulator family member 2 [Source:RGD Symbol;Acc:1308276]
ENSRNOG00000019854	151.612	0.643294	0.146066	4.40413	1.06208e-05	3.8146e-05	ENSRNOG00000019854	Napsa	napsin A aspartic peptidase [Source:RGD Symbol;Acc:61940]
ENSRNOG00000015413	287.563	-0.140281	0.0938261	-1.49511	0.134885	0.197366	ENSRNOG00000015413	Qpctl	glutaminyl-peptide cyclotransferase-like [Source:RGD Symbol;Acc:1308128]
ENSRNOG00000016897	457.404	-0.0466376	0.0937426	-0.497507	0.618831	0.697241	ENSRNOG00000016897	Rlbp1	retinaldehyde binding protein 1 [Source:RGD Symbol;Acc:1309649]
ENSRNOG00000037690	65.2111	-0.0906153	0.233693	-0.387754	0.698198	0.764249	ENSRNOG00000037690	Sertad3	SERTA domain containing 3 [Source:RGD Symbol;Acc:1564271]
ENSRNOG00000014330	4720.85	0.111042	0.04182	2.65523	0.00792543	0.016345	ENSRNOG00000014330	Pcmt1	protein-L-isoaspartate (D-aspartate) O-methyltransferase 1 [Source:RGD Symbol;Acc:3268]
ENSRNOG00000013223	519.262	0.108152	0.0796832	1.35727	0.174696	0.245145	ENSRNOG00000013223	Fah	fumarylacetoacetate hydrolase [Source:RGD Symbol;Acc:61932]
ENSRNOG00000046112	362.705	-0.191364	0.0966866	-1.97923	0.0477907	0.0802647	ENSRNOG00000046112	Dedd2	death effector domain containing 2 [Source:RGD Symbol;Acc:1588968]
ENSRNOG00000027264	2779.78	-0.281344	0.0568125	-4.95215	7.33994e-07	3.13388e-06	ENSRNOG00000027264	Dagla	diacylglycerol lipase, alpha [Source:RGD Symbol;Acc:1359461]
ENSRNOG00000032798	1380.78	-0.132589	0.0634551	-2.08949	0.0366635	0.0636374	ENSRNOG00000032798	Slco3a1	solute carrier organic anion transporter family, member 3a1 [Source:RGD Symbol;Acc:620227]
ENSRNOG00000019319	957.202	0.142151	0.086599	1.64149	0.100697	0.15374	ENSRNOG00000019319	Fchsd2	FCH and double SH3 domains 2 [Source:RGD Symbol;Acc:1304812]
ENSRNOG00000018603	407.476	0.342788	0.128638	2.66475	0.00770447	0.0159459	ENSRNOG00000018603	Carns1	carnosine synthase 1 [Source:RGD Symbol;Acc:1308234]
ENSRNOG00000027422	476.749	0.28117	0.0753768	3.73019	0.000191337	0.000552257	ENSRNOG00000027422	Fastkd3	FAST kinase domains 3 [Source:RGD Symbol;Acc:1309729]
ENSRNOG00000020763	8886.72	0.410877	0.0813281	5.05209	4.37009e-07	1.93411e-06	ENSRNOG00000020763	Snrnp70	small nuclear ribonucleoprotein U1 subunit 70 [Source:RGD Symbol;Acc:1307120]
ENSRNOG00000049505	246.67	-0.218789	0.104824	-2.0872	0.0368697	0.0639648	ENSRNOG00000049505	Nup43	nucleoporin 43 [Source:RGD Symbol;Acc:1596513]
ENSRNOG00000059408	1360.91	-0.254623	0.0865224	-2.94285	0.00325205	0.00737053	ENSRNOG00000059408	Prr12	proline rich 12 [Source:RGD Symbol;Acc:1309896]
ENSRNOG00000048250	69.5033	-0.256159	0.18731	-1.36757	0.171448	0.241525	ENSRNOG00000048250	Ldaf1	lipid droplet assembly factor 1 [Source:RGD Symbol;Acc:727895]
ENSRNOG00000028891	413.484	0.325154	0.1128	2.88258	0.00394438	0.00878068	ENSRNOG00000028891	Cyp2t1	cytochrome P450, family 2, subfamily t, polypeptide 1 [Source:RGD Symbol;Acc:620086]
ENSRNOG00000019959	18418.9	-0.188754	0.0644418	-2.92906	0.00339984	0.00766719	ENSRNOG00000019959	Kcnc3	potassium voltage-gated channel subfamily C member 3 [Source:RGD Symbol;Acc:621358]
ENSRNOG00000020452	1561.3	-0.178316	0.0572317	-3.11569	0.00183518	0.00437078	ENSRNOG00000020452	Nsmce4a	NSE4 homolog A, SMC5-SMC6 complex component [Source:RGD Symbol;Acc:1309025]
ENSRNOG00000050224	451.447	-0.082665	0.087838	-0.941108	0.346649	0.435441	ENSRNOG00000050224	Stambpl1	STAM binding protein-like 1 [Source:RGD Symbol;Acc:1583011]
ENSRNOG00000014916	1370.37	0.643652	0.0607127	10.6016	2.92913e-26	1.10478e-24	ENSRNOG00000014916	Lats1	large tumor suppressor kinase 1 [Source:RGD Symbol;Acc:1564085]
ENSRNOG00000020263	32589.5	-0.0435866	0.0556033	-0.783884	0.433108	0.523617	ENSRNOG00000020263	Atp1a3	ATPase Na+/K+ transporting subunit alpha 3 [Source:RGD Symbol;Acc:2169]
ENSRNOG00000058277	27.2549	0.766735	0.345472	2.21939	0.0264604	0.047701	ENSRNOG00000058277	AC080157.1
ENSRNOG00000051197	241.666	-0.237638	0.116633	-2.03748	0.0416022	0.070921	ENSRNOG00000051197	LOC120097345	60S ribosomal protein L7a [Source:RGD Symbol;Acc:41344265]
ENSRNOG00000020947	1330.65	-0.3565	0.0848126	-4.20339	2.62945e-05	8.83236e-05	ENSRNOG00000020947	Egln2	egl-9 family hypoxia-inducible factor 2 [Source:RGD Symbol;Acc:631376]
ENSRNOG00000020597	307.507	-0.0126373	0.107167	-0.117922	0.906129	0.930479	ENSRNOG00000020597	C1h10orf88	similar to human chromosome 10 open reading frame 88 [Source:RGD Symbol;Acc:1305014]
ENSRNOG00000017826	1327.26	-0.177414	0.0539582	-3.28799	0.00100906	0.00253417	ENSRNOG00000017826	Mtrr	5-methyltetrahydrofolate-homocysteine methyltransferase reductase [Source:RGD Symbol;Acc:1308671]
ENSRNOG00000013506	1710.53	0.476965	0.0583856	8.16923	3.1037e-16	4.30046e-15	ENSRNOG00000013506	Zfand6	zinc finger AN1-type containing 6 [Source:RGD Symbol;Acc:1359317]
ENSRNOG00000014277	495.186	0.0528616	0.0825094	0.640674	0.521734	0.610238	ENSRNOG00000014277	Zdhhc13	zinc finger DHHC-type palmitoyltransferase 13 [Source:RGD Symbol;Acc:1309736]
ENSRNOG00000012641	1637.42	-0.174917	0.0793446	-2.20452	0.0274878	0.0493388	ENSRNOG00000012641	Sfr1	SWI5-dependent homologous recombination repair protein 1 [Source:RGD Symbol;Acc:1305481]
ENSRNOG00000015675	915.291	-0.259471	0.0799785	-3.24427	0.00117754	0.00291693	ENSRNOG00000015675	Nell1	neural EGFL like 1 [Source:RGD Symbol;Acc:620998]
ENSRNOG00000050206	4708.51	-0.127682	0.0632628	-2.01827	0.043563	0.0739424	ENSRNOG00000050206	Shank2	SH3 and multiple ankyrin repeat domains 2 [Source:RGD Symbol;Acc:628772]
ENSRNOG00000012002	861.622	0.262071	0.0613204	4.2738	1.9217e-05	6.611e-05	ENSRNOG00000012002	Iqgap1	IQ motif containing GTPase activating protein 1 [Source:RGD Symbol;Acc:1311884]
ENSRNOG00000012788	1394.71	-0.265477	0.0532817	-4.98251	6.27636e-07	2.70603e-06	ENSRNOG00000012788	Clns1a	chloride nucleotide-sensitive channel 1A [Source:RGD Symbol;Acc:61884]
ENSRNOG00000019418	2448.53	-0.547444	0.133174	-4.11075	3.94374e-05	0.000128864	ENSRNOG00000019418	Lrrc4b	leucine rich repeat containing 4B [Source:RGD Symbol;Acc:1307121]
ENSRNOG00000042308	31.3515	-0.529706	0.273322	-1.93803	0.0526194	0.0873142	ENSRNOG00000042308	Zfp455l1	zinc finger protein 455 like 1 [Source:RGD Symbol;Acc:1594231]
ENSRNOG00000012574	781.018	-0.00493573	0.0615353	-0.0802097	0.93607	0.952624	ENSRNOG00000012574	Pum3	pumilio RNA-binding family member 3 [Source:RGD Symbol;Acc:1564753]
ENSRNOG00000001500	1056.79	-0.294267	0.066701	-4.41174	1.02544e-05	3.69215e-05	ENSRNOG00000001500	Rab4b	RAB4B, member RAS oncogene family [Source:RGD Symbol;Acc:620931]
ENSRNOG00000016737	604.706	-0.425555	0.0993883	-4.28174	1.85438e-05	6.39581e-05	ENSRNOG00000016737	Tcerg1l	transcription elongation regulator 1-like [Source:RGD Symbol;Acc:1562437]
ENSRNOG00000019413	104.208	0.426417	0.143123	2.97937	0.00288841	0.00660721	ENSRNOG00000019413	Atg16l2	autophagy related 16-like 2 [Source:RGD Symbol;Acc:1311400]
ENSRNOG00000068445	1802.29	-1.01523	0.152121	-6.67381	2.49252e-11	1.97457e-10	ENSRNOG00000068445	Rplp2	ribosomal protein lateral stalk subunit P2 [Source:RGD Symbol;Acc:621775]
ENSRNOG00000015844	594.568	-0.458789	0.0967555	-4.74174	2.11893e-06	8.49739e-06	ENSRNOG00000015844	Snrpd2	small nuclear ribonucleoprotein D2 polypeptide [Source:RGD Symbol;Acc:1593018]
ENSRNOG00000068953	386.787	0.0992023	0.0850879	1.16588	0.243663	0.325354	ENSRNOG00000068953
ENSRNOG00000017963	724.629	0.276784	0.0857111	3.22927	0.00124108	0.00305817	ENSRNOG00000017963	RGD1566325	similar to regulator of sex-limitation candidate 16 [Source:RGD Symbol;Acc:1566325]
ENSRNOG00000019532	1470.66	-0.255345	0.0807906	-3.16058	0.00157458	0.00380061	ENSRNOG00000019532	Emc10	ER membrane protein complex subunit 10 [Source:RGD Symbol;Acc:1303214]
ENSRNOG00000015217	800.861	-0.173926	0.0661499	-2.62928	0.00855667	0.0175422	ENSRNOG00000015217	Ltv1	LTV1 ribosome biogenesis factor [Source:RGD Symbol;Acc:1311264]
ENSRNOG00000016267	2136.19	-0.158416	0.0605333	-2.61701	0.0088705	0.0181267	ENSRNOG00000016267	Chst15	carbohydrate sulfotransferase 15 [Source:RGD Symbol;Acc:628881]
ENSRNOG00000020425	2677.71	-0.0233062	0.0582611	-0.40003	0.689134	0.756438	ENSRNOG00000020425	Stim1	stromal interaction molecule 1 [Source:RGD Symbol;Acc:1306831]
ENSRNOG00000017383	505.355	-0.0951167	0.111997	-0.849275	0.395728	0.485376	ENSRNOG00000017383	Hikeshi	heat shock protein nuclear import factor hikeshi [Source:RGD Symbol;Acc:1359455]
ENSRNOG00000019161	478.749	0.419278	0.0821299	5.10506	3.30692e-07	1.48347e-06	ENSRNOG00000019161	Cpeb1	cytoplasmic polyadenylation element binding protein 1 [Source:RGD Symbol;Acc:1310421]
ENSRNOG00000047526	585.643	-0.0683288	0.0682525	-1.00112	0.31677	0.40413	ENSRNOG00000047526	Zfp526	zinc finger protein 526 [Source:RGD Symbol;Acc:1588959]
ENSRNOG00000016462	504.282	0.322017	0.119038	2.70517	0.00682702	0.0143404	ENSRNOG00000016462	LOC102547287	zinc finger protein 728-like [Source:RGD Symbol;Acc:7718701]
ENSRNOG00000010664	310.964	-0.20095	0.0917006	-2.19137	0.0284249	0.0508511	ENSRNOG00000010664	Wdr73	WD repeat domain 73 [Source:RGD Symbol;Acc:1306429]
ENSRNOG00000019424	54.0124	-0.0255409	0.252445	-0.101174	0.919412	0.940594	ENSRNOG00000019424	Aspdh	aspartate dehydrogenase domain containing [Source:RGD Symbol;Acc:1310111]
ENSRNOG00000016790	2096.77	0.384181	0.0540074	7.11348	1.1315e-12	1.04586e-11	ENSRNOG00000016790	Kmt5b	lysine methyltransferase 5B [Source:RGD Symbol;Acc:1311637]
ENSRNOG00000039730	866.252	-0.31422	0.0694621	-4.52362	6.07913e-06	2.27337e-05	ENSRNOG00000039730	Orai3	ORAI calcium release-activated calcium modulator 3 [Source:RGD Symbol;Acc:1306538]
ENSRNOG00000020949	192.786	-0.393607	0.116381	-3.38206	0.000719448	0.00186589	ENSRNOG00000020949	Hsd17b14	hydroxysteroid (17-beta) dehydrogenase 14 [Source:RGD Symbol;Acc:1588673]
ENSRNOG00000013358	113.947	-0.297373	0.138185	-2.152	0.0313977	0.0555127	ENSRNOG00000013358	Aqp11	aquaporin 11 [Source:RGD Symbol;Acc:628763]
ENSRNOG00000049259	557.152	0.451807	0.099224	4.55341	5.27844e-06	1.99397e-05	ENSRNOG00000049259	LOC102549842	zinc finger protein 91-like [Source:RGD Symbol;Acc:7600894]
ENSRNOG00000015860	44.7557	1.84668	0.300774	6.13976	8.26478e-10	5.3697e-09	ENSRNOG00000015860	Gipr	gastric inhibitory polypeptide receptor [Source:RGD Symbol;Acc:2689]
ENSRNOG00000018517	106.324	0.40438	0.142398	2.83978	0.00451445	0.00992195	ENSRNOG00000018517	Trim21	tripartite motif-containing 21 [Source:RGD Symbol;Acc:1305795]
ENSRNOG00000021206	929.097	-0.442985	0.0651251	-6.80206	1.03135e-11	8.5065e-11	ENSRNOG00000021206	Plaat3	phospholipase A and acyltransferase 3 [Source:RGD Symbol;Acc:2829]
ENSRNOG00000069921	499.485	0.573661	0.0819627	6.99905	2.57698e-12	2.27756e-11	ENSRNOG00000069921	Zfp748	zinc finger protein 748 [Source:RGD Symbol;Acc:1594173]
ENSRNOG00000016054	1656.01	0.0549911	0.0508909	1.08057	0.279889	0.364639	ENSRNOG00000016054	Tab2	TGF-beta activated kinase 1/MAP3K7 binding protein 2 [Source:RGD Symbol;Acc:1309527]
ENSRNOG00000020956	210.742	-0.265242	0.103242	-2.56912	0.0101957	0.0204973	ENSRNOG00000020956	Bcat2	branched chain amino acid transaminase 2 [Source:RGD Symbol;Acc:68948]
ENSRNOG00000001501	322.487	-0.123895	0.0990603	-1.2507	0.211044	0.288702	ENSRNOG00000001501	Snrpa	small nuclear ribonucleoprotein polypeptide A [Source:RGD Symbol;Acc:1307416]
ENSRNOG00000020417	2622.87	-0.162473	0.0480413	-3.38195	0.000719737	0.0018663	ENSRNOG00000020417	Gsk3a	glycogen synthase kinase 3 alpha [Source:RGD Symbol;Acc:620351]
ENSRNOG00000013877	195.511	-0.371443	0.129988	-2.85752	0.00426972	0.00942831	ENSRNOG00000013877	Ttc23	tetratricopeptide repeat domain 23 [Source:RGD Symbol;Acc:1310409]
ENSRNOG00000064721	1703.5	0.134016	0.0713338	1.87872	0.0602829	0.0982566	ENSRNOG00000064721	Rgmb	repulsive guidance molecule BMP co-receptor b [Source:RGD Symbol;Acc:1595392]
ENSRNOG00000018878	1236.19	0.55694	0.0721866	7.71529	1.2071e-14	1.40339e-13	ENSRNOG00000018878	Ssh3	slingshot protein phosphatase 3 [Source:RGD Symbol;Acc:1308679]
ENSRNOG00000014852	448.123	0.705954	0.0852579	8.28021	1.22955e-16	1.78542e-15	ENSRNOG00000014852	Fbxo30	F-box protein 30 [Source:RGD Symbol;Acc:1359367]
ENSRNOG00000037715	513.813	0.0120558	0.0750501	0.160636	0.87238	0.905492	ENSRNOG00000037715	Actmap	actin maturation protease [Source:RGD Symbol;Acc:1560854]
ENSRNOG00000020793	726.063	-0.299961	0.0734063	-4.08631	4.38283e-05	0.000142219	ENSRNOG00000020793	Ruvbl2	RuvB-like AAA ATPase 2 [Source:RGD Symbol;Acc:1306509]
ENSRNOG00000047145	569.228	0.622862	0.0723592	8.60792	7.43981e-18	1.2221e-16	ENSRNOG00000047145	LOC102551340	zinc finger protein 728-like [Source:RGD Symbol;Acc:7697243]
ENSRNOG00000065613	24.804	2.57123	0.415027	6.19534	5.81602e-10	3.85637e-09	ENSRNOG00000065613	LOC102556715	uncharacterized LOC102556715 [Source:RGD Symbol;Acc:7749586]
ENSRNOG00000019442	365.421	-0.410344	0.134039	-3.06137	0.00220329	0.00515782	ENSRNOG00000019442	Josd2	Josephin domain containing 2 [Source:RGD Symbol;Acc:1307305]
ENSRNOG00000015152	71.1693	-0.797799	0.186679	-4.27365	1.92301e-05	6.61392e-05	ENSRNOG00000015152	Pkp3	plakophilin 3 [Source:RGD Symbol;Acc:1309133]
ENSRNOG00000016935	1798.02	0.615212	0.0823723	7.46868	8.10053e-14	8.53612e-13	ENSRNOG00000016935	Mapk1ip1	mitogen-activated protein kinase 1 interacting protein 1 [Source:RGD Symbol;Acc:1565431]
ENSRNOG00000018531	598.339	-0.400326	0.0739457	-5.41378	6.17076e-08	3.09198e-07	ENSRNOG00000018531	Mrps11	mitochondrial ribosomal protein S11 [Source:RGD Symbol;Acc:1559901]
ENSRNOG00000020426	145.134	-0.0725222	0.150036	-0.483366	0.628836	0.705557	ENSRNOG00000020426	Erf	Ets2 repressor factor [Source:RGD Symbol;Acc:1311991]
ENSRNOG00000016038	48.4154	-0.425368	0.212151	-2.00503	0.0449602	0.0760474	ENSRNOG00000016038	Mgmt	O-6-methylguanine-DNA methyltransferase [Source:RGD Symbol;Acc:3087]
ENSRNOG00000016611	1057.53	-0.482717	0.0627126	-7.69729	1.38983e-14	1.60811e-13	ENSRNOG00000016611	Hras	HRas proto-oncogene, GTPase [Source:RGD Symbol;Acc:2827]
ENSRNOG00000056118	4321.63	-0.164427	0.0814985	-2.01755	0.0436385	0.074062	ENSRNOG00000056118	Cic	capicua transcriptional repressor [Source:RGD Symbol;Acc:1310706]
ENSRNOG00000019127	469.664	0.753539	0.0751835	10.0227	1.21188e-23	3.56228e-22	ENSRNOG00000019127	Zfp606	zinc finger protein 606 [Source:RGD Symbol;Acc:1309810]
ENSRNOG00000046353	173.385	0.650777	0.124129	5.24275	1.58199e-07	7.46818e-07	ENSRNOG00000046353	Zfp273l-ps1	zinc finger protein 273 like, pseudogene 1 [Source:RGD Symbol;Acc:1587241]
ENSRNOG00000023150	11639.3	-0.303341	0.0474084	-6.39846	1.56954e-10	1.13446e-09	ENSRNOG00000023150	Gpi	glucose-6-phosphate isomerase [Source:RGD Symbol;Acc:2727]
ENSRNOG00000047229	457.173	-0.0622267	0.0928903	-0.669894	0.502925	0.592197	ENSRNOG00000047229	Trim68	tripartite motif containing 68 [Source:RGD Symbol;Acc:1593867]
ENSRNOG00000062741	72.4828	0.0779578	0.184026	0.423624	0.67184	0.742265	ENSRNOG00000062741	Ldhal6b	lactate dehydrogenase A-like 6B [Source:RGD Symbol;Acc:727955]
ENSRNOG00000019280	27.2727	1.02911	0.357577	2.87802	0.00400183	0.00889498	ENSRNOG00000019280	C1h19orf18	similar to human chromosome 19 open reading frame 18 [Source:RGD Symbol;Acc:1595996]
ENSRNOG00000020587	401.594	0.0207147	0.0959055	0.215991	0.828995	0.870571	ENSRNOG00000020587	Efemp2	EGF containing fibulin extracellular matrix protein 2 [Source:RGD Symbol;Acc:1359496]
ENSRNOG00000027240	3656.59	0.213065	0.0739265	2.88212	0.00395006	0.00879062	ENSRNOG00000027240	Kndc1	kinase non-catalytic C-lobe domain containing 1 [Source:RGD Symbol;Acc:1565261]
ENSRNOG00000020411	1448.54	0.0815661	0.0500542	1.62956	0.103195	0.157026	ENSRNOG00000020411	Sec23ip	SEC23 interacting protein [Source:RGD Symbol;Acc:1309328]
ENSRNOG00000063592	22.7022	0.451369	0.331492	1.36163	0.173315	0.243574	ENSRNOG00000063592	Lyve1	lymphatic vessel endothelial hyaluronan receptor 1 [Source:RGD Symbol;Acc:1310864]
ENSRNOG00000016973	140.912	-0.506888	0.157999	-3.20817	0.00133582	0.00327162	ENSRNOG00000016973	Tmem242	transmembrane protein 242 [Source:RGD Symbol;Acc:1307262]
ENSRNOG00000049232	176.435	0.418212	0.110717	3.77732	0.000158526	0.000463729	ENSRNOG00000049232	Tcf7l2	transcription factor 7 like 2 [Source:RGD Symbol;Acc:1583621]
ENSRNOG00000019318	1578.92	-0.292288	0.08308	-3.51816	0.000434556	0.00117421	ENSRNOG00000019318	Syt3	synaptotagmin 3 [Source:RGD Symbol;Acc:3805]
ENSRNOG00000018547	546.181	-0.358214	0.0745612	-4.80429	1.553e-06	6.35601e-06	ENSRNOG00000018547	Mrpl46	mitochondrial ribosomal protein L46 [Source:RGD Symbol;Acc:1309123]
ENSRNOG00000042592	433.613	-0.493083	0.079882	-6.17264	6.71575e-10	4.42466e-09	ENSRNOG00000042592	Rgs10	regulator of G-protein signaling 10 [Source:RGD Symbol;Acc:3562]
ENSRNOG00000064244	43.6719	0.410611	0.215193	1.9081	0.0563779	0.092609	ENSRNOG00000064244	LOC102552823	zinc finger protein 709-like [Source:RGD Symbol;Acc:7716102]
ENSRNOG00000020481	123.785	-0.454483	0.174266	-2.60798	0.00910783	0.0185621	ENSRNOG00000020481	Pafah1b3	platelet-activating factor acetylhydrolase 1b, catalytic subunit 3 [Source:RGD Symbol;Acc:620333]
ENSRNOG00000019501	859.259	0.0334485	0.067923	0.492447	0.622403	0.699982	ENSRNOG00000019501	Rmnd1	required for meiotic nuclear division 1 homolog [Source:RGD Symbol;Acc:1309546]
ENSRNOG00000017897	63.5373	0.703969	0.286504	2.4571	0.0140066	0.0271874	ENSRNOG00000017897	Adam8	ADAM metallopeptidase domain 8 [Source:RGD Symbol;Acc:1566394]
ENSRNOG00000016791	976.445	0.228426	0.0773822	2.95192	0.00315804	0.00716978	ENSRNOG00000016791	Chka	choline kinase alpha [Source:RGD Symbol;Acc:61944]
ENSRNOG00000021058	354.11	-0.00175945	0.0924692	-0.0190274	0.984819	0.989247	ENSRNOG00000021058	Grwd1	glutamate-rich WD repeat containing 1 [Source:RGD Symbol;Acc:1310649]
ENSRNOG00000012692	711.23	-0.201242	0.0697057	-2.88702	0.0038891	0.00867473	ENSRNOG00000012692	Riok2	RIO kinase 2 [Source:RGD Symbol;Acc:1311588]
ENSRNOG00000013351	2052.09	0.346931	0.0571919	6.06609	1.31058e-09	8.31773e-09	ENSRNOG00000013351	Stxbp5	syntaxin binding protein 5 [Source:RGD Symbol;Acc:708517]
ENSRNOG00000017509	569.325	-0.0583438	0.0672134	-0.868038	0.385373	0.474922	ENSRNOG00000017509	Eed	embryonic ectoderm development [Source:RGD Symbol;Acc:1309782]
ENSRNOG00000018515	91.4531	-0.140604	0.161093	-0.872811	0.382766	0.47223	ENSRNOG00000018515	Det1	DET1 partner of COP1 E3 ubiquitin ligase [Source:RGD Symbol;Acc:1309793]
ENSRNOG00000031927	847.886	-0.449282	0.117461	-3.82494	0.000130806	0.000388669	ENSRNOG00000031927	Klk6	kallikrein related-peptidase 6 [Source:RGD Symbol;Acc:3419]
ENSRNOG00000022164	119.026	-0.232552	0.164458	-1.41405	0.157347	0.224667	ENSRNOG00000022164	Zscan2	zinc finger and SCAN domain containing 2 [Source:RGD Symbol;Acc:1584548]
ENSRNOG00000021063	96.5614	-0.328921	0.218781	-1.50343	0.132729	0.19478	ENSRNOG00000021063	Grin2d	glutamate ionotropic receptor NMDA type subunit 2D [Source:RGD Symbol;Acc:2740]
ENSRNOG00000013407	157.848	0.0241967	0.131634	0.183819	0.854156	0.891594	ENSRNOG00000013407	Slc5a11	solute carrier family 5 member 11 [Source:RGD Symbol;Acc:621410]
ENSRNOG00000039076	520.657	0.386806	0.0927306	4.17129	3.02883e-05	0.000100599	ENSRNOG00000039076	Spaca6	sperm acrosome associated 6 [Source:RGD Symbol;Acc:1588836]
ENSRNOG00000019489	852.767	0.016881	0.0612868	0.275443	0.782976	0.833915	ENSRNOG00000019489	Armt1	acidic residue methyltransferase 1 [Source:RGD Symbol;Acc:1305235]
ENSRNOG00000031739	97.9547	-0.23769	0.190606	-1.24702	0.21239	0.29027	ENSRNOG00000031739	Garin5a	golgi associated RAB2 interactor 5A [Source:RGD Symbol;Acc:1311142]
ENSRNOG00000020235	6645.87	-0.0993906	0.0365884	-2.71645	0.00659861	0.0139129	ENSRNOG00000020235	Hnrnpl	heterogeneous nuclear ribonucleoprotein L [Source:RGD Symbol;Acc:71059]
ENSRNOG00000021130	2460.32	0.215567	0.0747966	2.88204	0.00395105	0.00879147	ENSRNOG00000021130	Abcc8	ATP binding cassette subfamily C member 8 [Source:RGD Symbol;Acc:3786]
ENSRNOG00000021017	1842.49	0.0395927	0.0768699	0.515061	0.606511	0.686449	ENSRNOG00000021017	Car11	carbonic anhydrase 11 [Source:RGD Symbol;Acc:735155]
ENSRNOG00000010994	114.235	0.664372	0.196842	3.37516	0.000737731	0.00190819	ENSRNOG00000010994	Has1	hyaluronan synthase 1 [Source:RGD Symbol;Acc:708528]
ENSRNOG00000012988	574.433	-0.123333	0.081789	-1.50794	0.13157	0.193393	ENSRNOG00000012988	Lix1	limb and CNS expressed 1 [Source:RGD Symbol;Acc:1309454]
ENSRNOG00000021027	2154.35	-0.482491	0.0821307	-5.87468	4.23668e-09	2.51105e-08	ENSRNOG00000021027	Dbp	D-box binding PAR bZIP transcription factor [Source:RGD Symbol;Acc:2491]
ENSRNOG00000042686	121.335	0.55512	0.135708	4.09056	4.3034e-05	0.000139829	ENSRNOG00000042686	Trim34	tripartite motif-containing 34 [Source:RGD Symbol;Acc:7240857]
ENSRNOG00000009922	79.8913	0.543938	0.213334	2.5497	0.0107816	0.0215498	ENSRNOG00000009922	Prlhr	prolactin releasing hormone receptor [Source:RGD Symbol;Acc:71037]
ENSRNOG00000014610	82.0784	-0.257662	0.188251	-1.36871	0.171089	0.241086	ENSRNOG00000014610	Anpep	alanyl aminopeptidase, membrane [Source:RGD Symbol;Acc:2991]
ENSRNOG00000020882	190.68	0.0472801	0.119928	0.394238	0.693405	0.75992	ENSRNOG00000020882	Shkbp1	Sh3kbp1 binding protein 1 [Source:RGD Symbol;Acc:1309281]
ENSRNOG00000067926	2395.87	-0.154914	0.0564462	-2.74446	0.00606105	0.0129145	ENSRNOG00000067926
ENSRNOG00000019627	44.7016	0.205231	0.255304	0.803872	0.421471	0.511977	ENSRNOG00000019627	Mybpc2	myosin binding protein C2 [Source:RGD Symbol;Acc:1311596]
ENSRNOG00000016940	1045.74	-0.224594	0.0503976	-4.45643	8.3334e-06	3.04963e-05	ENSRNOG00000016940	Ppp2r2d	protein phosphatase 2, regulatory subunit B, delta [Source:RGD Symbol;Acc:708356]
ENSRNOG00000015488	134.44	1.28882	0.201301	6.40247	1.52881e-10	1.10612e-09	ENSRNOG00000015488	Tead1	TEA domain transcription factor 1 [Source:RGD Symbol;Acc:1549742]
ENSRNOG00000015609	326.682	0.313495	0.103192	3.03798	0.00238172	0.00553892	ENSRNOG00000015609	Wdr27	WD repeat domain 27 [Source:RGD Symbol;Acc:1309633]
ENSRNOG00000030776	767.877	0.198854	0.094259	2.10966	0.0348878	0.0609121	ENSRNOG00000030776	Sytl2	synaptotagmin-like 2 [Source:RGD Symbol;Acc:1307647]
ENSRNOG00000020308	1385.07	-0.451574	0.0635638	-7.10427	1.20962e-12	1.11311e-11	ENSRNOG00000020308	Ech1	enoyl-CoA hydratase 1 [Source:RGD Symbol;Acc:69353]
ENSRNOG00000021032	914.918	-0.382867	0.0724357	-5.28561	1.25284e-07	5.99425e-07	ENSRNOG00000021032	Sphk2	sphingosine kinase 2 [Source:RGD Symbol;Acc:1307757]
ENSRNOG00000017191	222.289	0.427068	0.114853	3.7184	0.00020049	0.000575596	ENSRNOG00000017191	Trim5	tripartite motif-containing 5 [Source:RGD Symbol;Acc:1304579]
ENSRNOG00000070392	755.135	0.490417	0.0820811	5.97478	2.30397e-09	1.41583e-08	ENSRNOG00000070392	Spty2d1	SPT2 chromatin protein domain containing 1 [Source:RGD Symbol;Acc:2319415]
ENSRNOG00000018369	37.4047	-0.503439	0.248289	-2.02763	0.0425978	0.0724313	ENSRNOG00000018369	Prx	periaxin [Source:RGD Symbol;Acc:619960]
ENSRNOG00000025587	77.9105	1.02171	0.258051	3.95933	7.516e-05	0.000234206	ENSRNOG00000025587	Plagl1	PLAG1 like zinc finger 1 [Source:RGD Symbol;Acc:3014]
ENSRNOG00000023053	2267.35	0.294458	0.0523683	5.62282	1.87864e-08	1.01804e-07	ENSRNOG00000023053	Ice1	interactor of little elongation complex ELL subunit 1 [Source:RGD Symbol;Acc:1309747]
ENSRNOG00000033498	188.307	-0.184666	0.120717	-1.52974	0.12608	0.186475	ENSRNOG00000033498	Cib1	calcium and integrin binding 1 [Source:RGD Symbol;Acc:620133]
ENSRNOG00000070184	127.508	1.22661	0.162698	7.53915	4.7305e-14	5.13135e-13	ENSRNOG00000070184	LOC100125364	RIKEN cDNA 1600012H06 gene [Source:MGI Symbol;Acc:MGI:1915162]
ENSRNOG00000065015	57.5972	-0.171038	0.215157	-0.794944	0.426646	0.51701	ENSRNOG00000065015
ENSRNOG00000012460	185.113	-0.0332175	0.110731	-0.299983	0.76419	0.818529	ENSRNOG00000012460	Cntf	ciliary neurotrophic factor [Source:RGD Symbol;Acc:2370]
ENSRNOG00000026163	1490.59	0.0953179	0.066072	1.44264	0.149123	0.214588	ENSRNOG00000026163	Cpt1c	carnitine palmitoyltransferase 1c [Source:RGD Symbol;Acc:1305384]
ENSRNOG00000040242	270.392	0.594443	0.13547	4.38802	1.14387e-05	4.08914e-05	ENSRNOG00000040242	Epm2a	EPM2A glucan phosphatase, laforin [Source:RGD Symbol;Acc:71047]
ENSRNOG00000021035	3980.48	-0.48543	0.0460489	-10.5416	5.55349e-26	2.04676e-24	ENSRNOG00000021035	Rpl18	ribosomal protein L18 [Source:RGD Symbol;Acc:621182]
ENSRNOG00000020675	1101.67	-0.438657	0.0575159	-7.62671	2.40812e-14	2.71704e-13	ENSRNOG00000020675	Ccdc97	coiled-coil domain containing 97 [Source:RGD Symbol;Acc:1309393]
ENSRNOG00000012036	89.3449	0.274233	0.19157	1.4315	0.152287	0.218384	ENSRNOG00000012036	Pcsk5	proprotein convertase subtilisin/kexin type 5 [Source:RGD Symbol;Acc:620326]
ENSRNOG00000015551	487.184	-0.245713	0.0735094	-3.3426	0.00082996	0.00212106	ENSRNOG00000015551	Fuca2	alpha-L-fucosidase 2 [Source:RGD Symbol;Acc:1303053]
ENSRNOG00000020683	3650.59	-0.180628	0.0388254	-4.65231	3.28231e-06	1.2809e-05	ENSRNOG00000020683	Hnrnpul1	heterogeneous nuclear ribonucleoprotein U-like 1 [Source:RGD Symbol;Acc:1307456]
ENSRNOG00000019283	51.6881	-0.478266	0.228975	-2.08872	0.0367326	0.0637422	ENSRNOG00000019283	P2ry2	purinergic receptor P2Y2 [Source:RGD Symbol;Acc:62088]
ENSRNOG00000055650	111.316	0.199866	0.143161	1.3961	0.162686	0.231196	ENSRNOG00000055650	Pou2f2	POU class 2 homeobox 2 [Source:RGD Symbol;Acc:621690]
ENSRNOG00000064293	408.232	-0.0119743	0.0766047	-0.156313	0.875786	0.908054	ENSRNOG00000064293	Gdpgp1	GDP-D-glucose phosphorylase 1 [Source:RGD Symbol;Acc:1560277]
ENSRNOG00000021039	50.963	-0.507322	0.190699	-2.66033	0.00780637	0.0161269	ENSRNOG00000021039	Fam83e	family with sequence similarity 83, member E [Source:RGD Symbol;Acc:1309316]
ENSRNOG00000014434	1087.2	0.462251	0.0729102	6.34001	2.29751e-10	1.61624e-09	ENSRNOG00000014434	Chd1	chromodomain helicase DNA binding protein 1 [Source:RGD Symbol;Acc:1306794]
ENSRNOG00000014290	4564.94	0.308883	0.0548813	5.62819	1.82109e-08	9.89301e-08	ENSRNOG00000014290	Grm1	glutamate metabotropic receptor 1 [Source:RGD Symbol;Acc:2742]
ENSRNOG00000020812	895.036	-0.124791	0.0533249	-2.34021	0.0192729	0.0359535	ENSRNOG00000020812	Gys1	glycogen synthase 1 [Source:RGD Symbol;Acc:1589798]
ENSRNOG00000020546	230.014	-0.195601	0.0977024	-2.00201	0.0452838	0.0765146	ENSRNOG00000020546	Lipe	lipase E, hormone sensitive type [Source:RGD Symbol;Acc:3010]
ENSRNOG00000012524	6131	0.218794	0.0462236	4.73339	2.20802e-06	8.83757e-06	ENSRNOG00000012524	Zfp91	zinc finger protein 91 [Source:RGD Symbol;Acc:628736]
ENSRNOG00000042777	417.717	0.0871662	0.0786239	1.10865	0.267582	0.351921	ENSRNOG00000042777	Zfp78	zinc finger protein 28 [Source:RGD Symbol;Acc:7679103]
ENSRNOG00000012103	20.9427	0.76002	0.413528	1.83789	0.0660782	0.106495	ENSRNOG00000012103	Nmbr	neuromedin B receptor [Source:RGD Symbol;Acc:3181]
ENSRNOG00000019728	204.151	0.494458	0.128835	3.83793	0.000124077	0.000371184	ENSRNOG00000019728	Itgad	integrin subunit alpha M [Source:RGD Symbol;Acc:2926]
ENSRNOG00000046874	412.508	-0.0420096	0.092031	-0.456472	0.648051	0.722483	ENSRNOG00000046874	Snx9	sorting nexin 9 [Source:RGD Symbol;Acc:1584466]
ENSRNOG00000027405	2691.3	0.500344	0.053995	9.26649	1.92368e-20	4.06014e-19	ENSRNOG00000027405	Ccp110	centriolar coiled-coil protein 110 [Source:RGD Symbol;Acc:1310509]
ENSRNOG00000026109	2133.48	-0.356961	0.0474837	-7.51756	5.58075e-14	5.99837e-13	ENSRNOG00000026109	Prmt1	protein arginine methyltransferase 1 [Source:RGD Symbol;Acc:62020]
ENSRNOG00000021046	29.2543	-0.341147	0.281159	-1.21336	0.224993	0.304371	ENSRNOG00000021046	Sult2b1	sulfotransferase family 2B member 1 [Source:RGD Symbol;Acc:1308882]
ENSRNOG00000015660	757.46	0.0956501	0.0765788	1.24904	0.21165	0.28941	ENSRNOG00000015660	Pex3	peroxisomal biogenesis factor 3 [Source:RGD Symbol;Acc:621636]
ENSRNOG00000017854	270.616	-0.440627	0.125655	-3.50664	0.000453803	0.00122212	ENSRNOG00000017854	Ucp2	uncoupling protein 2 [Source:RGD Symbol;Acc:3932]
ENSRNOG00000001488	3083.63	-0.363882	0.0399473	-9.10904	8.31127e-20	1.66237e-18	ENSRNOG00000001488	Psmb1	proteasome 20S subunit beta 1 [Source:RGD Symbol;Acc:621092]
ENSRNOG00000020713	329.102	-0.0922943	0.0964661	-0.956754	0.338691	0.427293	ENSRNOG00000020713	Osbpl5	oxysterol binding protein-like 5 [Source:RGD Symbol;Acc:1308402]
ENSRNOG00000067308	24.872	0.285241	0.296402	0.962347	0.335875	0.42433	ENSRNOG00000067308
ENSRNOG00000064385	3937.39	-0.553414	0.132566	-4.17461	2.98494e-05	9.9277e-05	ENSRNOG00000064385	Ftl1	ferritin light chain 1 [Source:RGD Symbol;Acc:61813]
ENSRNOG00000046983	162.604	0.430727	0.134055	3.21307	0.00131325	0.00322178	ENSRNOG00000046983	Adat2	adenosine deaminase, tRNA-specific 2 [Source:RGD Symbol;Acc:1309642]
ENSRNOG00000012611	69.9877	0.030689	0.174957	0.175409	0.860758	0.896633	ENSRNOG00000012611	Lpxn	leupaxin [Source:RGD Symbol;Acc:1304981]
ENSRNOG00000018773	293.201	-0.0813422	0.0893811	-0.910061	0.36279	0.451691	ENSRNOG00000018773	Mtrf1l	mitochondrial translation release factor 1 like [Source:RGD Symbol;Acc:1598312]
ENSRNOG00000017508	590.703	0.676128	0.116607	5.79833	6.69771e-09	3.86556e-08	ENSRNOG00000017508	Kmt5c	lysine methyltransferase 5C [Source:RGD Symbol;Acc:1305226]
ENSRNOG00000019555	1507.88	-0.29012	0.0563685	-5.14685	2.649e-07	1.20887e-06	ENSRNOG00000019555	Arap1	ArfGAP with RhoGAP domain, ankyrin repeat and PH domain 1 [Source:RGD Symbol;Acc:1310385]
ENSRNOG00000020876	465.235	-0.317121	0.088487	-3.58382	0.000338604	0.000934233	ENSRNOG00000020876	Bax	BCL2 associated X, apoptosis regulator [Source:RGD Symbol;Acc:2192]
ENSRNOG00000034184	157.491	-0.231873	0.127444	-1.81941	0.0688488	0.110372	ENSRNOG00000034184	Zfp583	zinc finger protein 583 [Source:RGD Symbol;Acc:1562044]
ENSRNOG00000020233	1943.06	-0.46366	0.0570639	-8.12529	4.463e-16	6.09663e-15	ENSRNOG00000020233	Rabac1	Rab acceptor 1 [Source:RGD Symbol;Acc:621002]
ENSRNOG00000020883	313.176	0.338777	0.106082	3.19352	0.00140547	0.00342259	ENSRNOG00000020883	Dhdh	dihydrodiol dehydrogenase [Source:RGD Symbol;Acc:1588686]
ENSRNOG00000001489	417.739	0.241255	0.0890129	2.71034	0.00672148	0.0141433	ENSRNOG00000001489	Tbp	TATA box binding protein [Source:RGD Symbol;Acc:67398]
ENSRNOG00000024414	1972.58	0.416358	0.0615495	6.7646	1.33676e-11	1.08868e-10	ENSRNOG00000024414	Ate1	arginyltransferase 1 [Source:RGD Symbol;Acc:1309335]
ENSRNOG00000046971	55.3778	0.170472	0.23216	0.734284	0.462776	0.553266	ENSRNOG00000046971	Ccer2	coiled-coil glutamate-rich protein 2 [Source:RGD Symbol;Acc:6502457]
ENSRNOG00000033906	501.846	-0.0225217	0.102737	-0.219217	0.826481	0.868718	ENSRNOG00000033906	Zfp667	zinc finger protein 667 [Source:RGD Symbol;Acc:1359114]
ENSRNOG00000027784	27.0371	-0.434862	0.291825	-1.49015	0.136185	0.199028	ENSRNOG00000027784	Tsku	tsukushi, small leucine rich proteoglycan [Source:RGD Symbol;Acc:1359311]
ENSRNOG00000021048	1503.51	-0.0343878	0.102657	-0.334979	0.737641	0.797648	ENSRNOG00000021048	Lmtk3	lemur tyrosine kinase 3 [Source:RGD Symbol;Acc:1588641]
ENSRNOG00000018690	356.183	0.798508	0.10793	7.39839	1.37842e-13	1.41256e-12	ENSRNOG00000018690	Rgs17	regulator of G-protein signaling 17 [Source:RGD Symbol;Acc:1305515]
ENSRNOG00000011540	1583.98	-0.351342	0.0468058	-7.50637	6.07873e-14	6.49994e-13	ENSRNOG00000011540	Vta1	vesicle trafficking 1 [Source:RGD Symbol;Acc:1305031]
ENSRNOG00000020063	279.731	-0.528547	0.103086	-5.12727	2.9398e-07	1.33029e-06	ENSRNOG00000020063	Nfkbib	NFKB inhibitor beta [Source:RGD Symbol;Acc:621887]
ENSRNOG00000017678	397.748	0.206448	0.0922918	2.23691	0.0252925	0.0458403	ENSRNOG00000017678	Ap2b1-ps1	adaptor related protein complex 2 subunit beta 1, pseudogene 1 [Source:RGD Symbol;Acc:1595515]
ENSRNOG00000011476	340.95	0.0193748	0.0911826	0.212484	0.83173	0.872718	ENSRNOG00000011476	Nars2	asparaginyl-tRNA synthetase 2, mitochondrial [Source:RGD Symbol;Acc:1305145]
ENSRNOG00000024460	786.155	-0.114319	0.0625525	-1.82757	0.0676138	0.108705	ENSRNOG00000024460	Tars3	threonyl-tRNA synthetase 3 [Source:RGD Symbol;Acc:1311308]
ENSRNOG00000020982	5256.01	-0.72875	0.083689	-8.70783	3.09752e-18	5.32297e-17	ENSRNOG00000020982	Fau	similar to Finkel-Biskis-Reilly murine sarcoma virusubiquitously expressed [Source:RGD Symbol;Acc:1597505]
ENSRNOG00000001490	281.656	-0.267138	0.0979432	-2.72748	0.00638204	0.0135191	ENSRNOG00000001490	Pdcd2	programmed cell death 2 [Source:RGD Symbol;Acc:61887]
ENSRNOG00000011480	1180.92	0.353677	0.0611039	5.78812	7.11774e-09	4.07237e-08	ENSRNOG00000011480	Tubgcp5	tubulin, gamma complex associated protein 5 [Source:RGD Symbol;Acc:1304689]
ENSRNOG00000020578	503.855	0.661546	0.194813	3.39581	0.000684266	0.00178324	ENSRNOG00000020578	Ceacam1	CEA cell adhesion molecule 1 [Source:RGD Symbol;Acc:67396]
ENSRNOG00000012872	161.9	0.547782	0.126404	4.33358	1.46706e-05	5.15551e-05	ENSRNOG00000012872	Carnmt1	carnosine N-methyltransferase 1 [Source:RGD Symbol;Acc:1311863]
ENSRNOG00000010087	463.722	-0.0565079	0.0790713	-0.714645	0.474828	0.565119	ENSRNOG00000010087	Zfp143	zinc finger protein 143 [Source:RGD Symbol;Acc:1305662]
ENSRNOG00000021493	61.9175	0.128667	0.234213	0.549358	0.58276	0.665465	ENSRNOG00000021493	Prdm9	PR/SET domain 9 [Source:RGD Symbol;Acc:1305247]
ENSRNOG00000020889	6680.39	-0.0977395	0.047597	-2.05348	0.040026	0.0686045	ENSRNOG00000020889	Nucb1	nucleobindin 1 [Source:RGD Symbol;Acc:620030]
ENSRNOG00000047575	258.343	-0.189482	0.0979002	-1.93546	0.0529334	0.0877951	ENSRNOG00000047575	Dhx34	DExH-box helicase 34 [Source:RGD Symbol;Acc:1584452]
ENSRNOG00000061450	155.821	0.205426	0.141763	1.44908	0.147314	0.212364	ENSRNOG00000061450	Homer2	homer scaffold protein 2 [Source:RGD Symbol;Acc:620705]
ENSRNOG00000020102	4545.16	-0.177266	0.0476782	-3.71796	0.000200838	0.000576358	ENSRNOG00000020102	Sirt2	sirtuin 2 [Source:RGD Symbol;Acc:621481]
ENSRNOG00000017429	73.42	0.588434	0.222906	2.63983	0.00829477	0.0170583	ENSRNOG00000017429	Lat	linker for activation of T cells [Source:RGD Symbol;Acc:620802]
ENSRNOG00000010753	2230.39	-0.127135	0.0519179	-2.44877	0.0143346	0.0277389	ENSRNOG00000010753	Aig1	androgen-induced 1 [Source:RGD Symbol;Acc:1562920]
ENSRNOG00000020605	522.08	0.301029	0.0793203	3.7951	0.000147582	0.000434869	ENSRNOG00000020605	Pstk	phosphoseryl-tRNA kinase [Source:RGD Symbol;Acc:1564300]
ENSRNOG00000012576	854.74	-0.297513	0.0588623	-5.05439	4.31768e-07	1.91321e-06	ENSRNOG00000012576	Selenos	selenoprotein S [Source:RGD Symbol;Acc:628897]
ENSRNOG00000015517	357.211	-0.152614	0.0965551	-1.58059	0.113971	0.171004	ENSRNOG00000015517	Zfp444	zinc finger protein 444 [Source:RGD Symbol;Acc:1304847]
ENSRNOG00000017030	2444.03	0.186054	0.0464293	4.00725	6.14304e-05	0.000194257	ENSRNOG00000017030	Arid1b	AT-rich interaction domain 1B [Source:RGD Symbol;Acc:708504]
ENSRNOG00000025644	544.989	0.108371	0.0828688	1.30774	0.190962	0.264418	ENSRNOG00000025644	C1h9orf40	similar to human chromosome 9 open reading frame 40 [Source:RGD Symbol;Acc:1563237]
ENSRNOG00000013663	126.394	-0.22238	0.150341	-1.47917	0.139095	0.202527	ENSRNOG00000013663	Tmem86a	transmembrane protein 86A [Source:RGD Symbol;Acc:1305749]
ENSRNOG00000047035	265.353	-0.0203374	0.0932812	-0.218022	0.827412	0.869444	ENSRNOG00000047035	Fadd	Fas associated via death domain [Source:RGD Symbol;Acc:628700]
ENSRNOG00000015658	4642.83	0.305476	0.0548925	5.56498	2.62179e-08	1.38743e-07	ENSRNOG00000015658	Sorbs1	sorbin and SH3 domain containing 1 [Source:RGD Symbol;Acc:1586598]
ENSRNOG00000014791	15174.7	0.528699	0.0544838	9.70378	2.90542e-22	7.52044e-21	ENSRNOG00000014791	Peg3	paternally expressed 3 [Source:RGD Symbol;Acc:2323590]
ENSRNOG00000019249	5389.54	0.0678724	0.0460346	1.47438	0.14038	0.204112	ENSRNOG00000019249	Ap3b2	adaptor related protein complex 3 subunit beta 2 [Source:RGD Symbol;Acc:1308950]
ENSRNOG00000069065	38.0556	-0.158799	0.284362	-0.558437	0.576546	0.659662	ENSRNOG00000069065	Fam181b	family with sequence similarity 181, member B [Source:RGD Symbol;Acc:1564695]
ENSRNOG00000011290	639.575	-0.299414	0.0799468	-3.74516	0.00018028	0.000522837	ENSRNOG00000011290	Tm2d3	TM2 domain containing 3 [Source:RGD Symbol;Acc:1564929]
ENSRNOG00000019485	2103.64	-0.241731	0.0557878	-4.33304	1.47067e-05	5.16586e-05	ENSRNOG00000019485	Bckdk	lysine acetyltransferase 8 [Source:RGD Symbol;Acc:1311512]
ENSRNOG00000015822	2211.64	-0.163273	0.0553542	-2.9496	0.00318182	0.00722039	ENSRNOG00000015822	Klf13	KLF transcription factor 13 [Source:RGD Symbol;Acc:1565099]
ENSRNOG00000015456	250.787	-0.532509	0.0952332	-5.59163	2.2495e-08	1.20357e-07	ENSRNOG00000015456	Zfp787	zinc finger protein 787 [Source:RGD Symbol;Acc:1310536]
ENSRNOG00000020995	32.0601	0.209069	0.251899	0.829972	0.406555	0.496558	ENSRNOG00000020995	Fut1	fucosyltransferase 1 [Source:RGD Symbol;Acc:2638]
ENSRNOG00000020310	1465.52	-0.284071	0.0747065	-3.8025	0.000143246	0.000422779	ENSRNOG00000020310	Grik5	glutamate ionotropic receptor kainate type subunit 5 [Source:RGD Symbol;Acc:2735]
ENSRNOG00000020669	62.4004	-0.0613215	0.204318	-0.300128	0.764079	0.818471	ENSRNOG00000020669	Ovol1	ovo like transcriptional repressor 1 [Source:RGD Symbol;Acc:1306956]
ENSRNOG00000020699	51.646	0.184484	0.200708	0.919164	0.35801	0.447196	ENSRNOG00000020699	Cd37	CD37 molecule [Source:RGD Symbol;Acc:62035]
ENSRNOG00000021507	813.927	0.721941	0.0999361	7.22402	5.04732e-13	4.84879e-12	ENSRNOG00000021507	Luzp2	leucine zipper protein 2 [Source:RGD Symbol;Acc:6496163]
ENSRNOG00000006962	146.279	-0.26881	0.179808	-1.49499	0.134918	0.197394	ENSRNOG00000006962	Stk32c	serine/threonine kinase 32C [Source:RGD Symbol;Acc:1305864]
ENSRNOG00000018012	5102.45	0.550616	0.0857265	6.42294	1.33663e-10	9.71921e-10	ENSRNOG00000018012	Tulp4	TUB like protein 4 [Source:RGD Symbol;Acc:1564487]
ENSRNOG00000069456	70.6297	0.0806889	0.189017	0.426887	0.669462	0.740667	ENSRNOG00000069456
ENSRNOG00000015180	865.051	-0.0707248	0.064314	-1.09968	0.271472	0.356069	ENSRNOG00000015180	Kdm8	lysine demethylase 8 [Source:RGD Symbol;Acc:1304823]
ENSRNOG00000020164	1437.67	-0.619773	0.0649802	-9.53787	1.45792e-21	3.49348e-20	ENSRNOG00000020164	Ifitm10	interferon induced transmembrane protein 10 [Source:RGD Symbol;Acc:1563319]
ENSRNOG00000025354	26.7535	-0.313633	0.286933	-1.09305	0.274371	0.359255	ENSRNOG00000025354	Rinl	Ras and Rab interactor-like [Source:RGD Symbol;Acc:1310133]
ENSRNOG00000031662	917.662	0.313636	0.0839401	3.73642	0.000186656	0.000540085	ENSRNOG00000031662	Slc6a5	solute carrier family 6 member 5 [Source:RGD Symbol;Acc:621824]
ENSRNOG00000026861	390.648	-0.0728203	0.109406	-0.665599	0.505667	0.594799	ENSRNOG00000026861	Zscan18	zinc finger and SCAN domain containing 18 [Source:RGD Symbol;Acc:1560671]
ENSRNOG00000029049	1333.45	-0.36837	0.0539218	-6.83156	8.39947e-12	6.98477e-11	ENSRNOG00000029049	Zdhhc14	zinc finger DHHC-type palmitoyltransferase 14 [Source:RGD Symbol;Acc:1565877]
ENSRNOG00000017220	248.104	0.104361	0.111954	0.932179	0.351244	0.43988	ENSRNOG00000017220	Tcirg1	T-cell immune regulator 1, ATPase H+ transporting V0 subunit A3 [Source:RGD Symbol;Acc:735136]
ENSRNOG00000014779	2253.79	-0.183697	0.0655007	-2.8045	0.0050394	0.0109563	ENSRNOG00000014779	Pdcd4	programmed cell death 4 [Source:RGD Symbol;Acc:620816]
ENSRNOG00000031459	425.256	-0.0853871	0.079719	-1.0711	0.284124	0.369255	ENSRNOG00000031459	Znf8	zinc finger protein 8 [Source:RGD Symbol;Acc:41193534]
ENSRNOG00000018336	611.025	-0.3381	0.0841429	-4.01817	5.86527e-05	0.000186163	ENSRNOG00000018336	Eps8l2	EPS8-like 2 [Source:RGD Symbol;Acc:1310912]
ENSRNOG00000021011	22.6143	-0.0939274	0.316872	-0.296421	0.766909	0.820594	ENSRNOG00000021011	Fut2	fucosyltransferase 2 [Source:RGD Symbol;Acc:2639]
ENSRNOG00000055761	1522.62	0.000949789	0.0610121	0.0155672	0.98758	0.991439	ENSRNOG00000055761	Zfp574	zinc finger protein 574 [Source:RGD Symbol;Acc:1311420]
ENSRNOG00000009891	1737.48	0.25705	0.0607099	4.23407	2.295e-05	7.7882e-05	ENSRNOG00000009891	Pcf11	PCF11 cleavage and polyadenylation factor subunit [Source:RGD Symbol;Acc:1563397]
ENSRNOG00000011058	1641.77	0.790525	0.214598	3.68376	0.00022982	0.000652182	ENSRNOG00000011058	Utrn	utrophin [Source:RGD Symbol;Acc:3947]
ENSRNOG00000031113	347.78	-0.145699	0.109949	-1.32515	0.18512	0.257435	ENSRNOG00000031113	Zscan22	zinc finger and SCAN domain containing 22 [Source:RGD Symbol;Acc:7606541]
ENSRNOG00000015972	56.3916	0.777078	0.240387	3.23261	0.00122666	0.00302673	ENSRNOG00000015972	Ano5	anoctamin 5 [Source:RGD Symbol;Acc:1564265]
ENSRNOG00000047019	143.328	-0.55062	0.150932	-3.64813	0.000264161	0.000741233	ENSRNOG00000047019	Bbip1	BBSome interacting protein 1 [Source:RGD Symbol;Acc:6498801]
ENSRNOG00000011077	2575.04	0.481802	0.0461239	10.4458	1.53116e-25	5.35758e-24	ENSRNOG00000011077	Tjp1	tight junction protein 1 [Source:RGD Symbol;Acc:1306305]
ENSRNOG00000052687	3887.98	0.205582	0.0691007	2.9751	0.00292889	0.00669137	ENSRNOG00000052687	Megf8	multiple EGF-like-domains 8 [Source:RGD Symbol;Acc:621190]
ENSRNOG00000019453	2797.36	-0.373427	0.0462739	-8.06994	7.03339e-16	9.3785e-15	ENSRNOG00000019453	Rps5	ribosomal protein S5 [Source:RGD Symbol;Acc:3601]
ENSRNOG00000015339	1317.53	0.275135	0.0613138	4.48732	7.21239e-06	2.66424e-05	ENSRNOG00000015339	Shoc2	SHOC2 leucine-rich repeat scaffold protein [Source:RGD Symbol;Acc:1308146]
ENSRNOG00000016697	42.313	0.116535	0.275638	0.422783	0.672454	0.742703	ENSRNOG00000016697	Lrrc56	leucine rich repeat containing 56 [Source:RGD Symbol;Acc:1311654]
ENSRNOG00000020206	5580.16	-0.209086	0.0393511	-5.31336	1.07625e-07	5.19554e-07	ENSRNOG00000020206	Ctsd	cathepsin D [Source:RGD Symbol;Acc:621511]
ENSRNOG00000027436	292.93	0.0605349	0.118099	0.512577	0.608247	0.688146	ENSRNOG00000027436	Zfp324	zinc finger protein 324 [Source:RGD Symbol;Acc:1306631]
ENSRNOG00000062814	5668.96	-0.396984	0.0607501	-6.53472	6.37307e-11	4.80246e-10	ENSRNOG00000062814	Cend1	cell cycle exit and neuronal differentiation 1 [Source:RGD Symbol;Acc:1309401]
ENSRNOG00000018524	204.417	-0.684998	0.115223	-5.94497	2.76505e-09	1.68138e-08	ENSRNOG00000018524	Ezr	ezrin [Source:RGD Symbol;Acc:621161]
ENSRNOG00000016147	300.299	0.798786	0.614887	1.29908	0.193917	0.267821	ENSRNOG00000016147	Slc17a6	solute carrier family 17 member 6 [Source:RGD Symbol;Acc:620531]
ENSRNOG00000021056	386.226	-0.254141	0.0968564	-2.62389	0.00869307	0.0178017	ENSRNOG00000021056	Kcnj14	potassium inwardly-rectifying channel, subfamily J, member 14 [Source:RGD Symbol;Acc:628872]
ENSRNOG00000037638	995.422	-0.341197	0.0590707	-5.77607	7.64637e-09	4.35594e-08	ENSRNOG00000037638	Timm50	translocase of inner mitochondrial membrane 50 [Source:RGD Symbol;Acc:1587684]
ENSRNOG00000019199	287.166	-0.591599	0.0972305	-6.0845	1.16859e-09	7.46221e-09	ENSRNOG00000019199	Cracr2b	calcium release activated channel regulator 2B [Source:RGD Symbol;Acc:1560911]
ENSRNOG00000015218	468.995	-0.438579	0.0778868	-5.63097	1.79194e-08	9.74927e-08	ENSRNOG00000015218	Nsmce1	NSE1 homolog, SMC5-SMC6 complex component [Source:RGD Symbol;Acc:1307760]
ENSRNOG00000015030	1383.07	-0.0196151	0.0568309	-0.345149	0.729983	0.791136	ENSRNOG00000015030	Tjp2	tight junction protein 2 [Source:RGD Symbol;Acc:619807]
ENSRNOG00000011015	5320.47	0.411162	0.0799177	5.14481	2.67788e-07	1.22166e-06	ENSRNOG00000011015	Hivep2	HIVEP zinc finger 2 [Source:RGD Symbol;Acc:61988]
ENSRNOG00000020700	149.077	0.32374	0.134357	2.40956	0.0159717	0.0305083	ENSRNOG00000020700	Rnaseh2c	ribonuclease H2, subunit C [Source:RGD Symbol;Acc:2319141]
ENSRNOG00000016327	322.856	-0.533703	0.102646	-5.19947	1.99854e-07	9.29855e-07	ENSRNOG00000016327	Mcee	methylmalonyl CoA epimerase [Source:RGD Symbol;Acc:1309966]
ENSRNOG00000014829	417.019	-5.57734e-05	0.0944345	-0.000590604	0.999529	0.999598	ENSRNOG00000014829	Prmt3	protein arginine methyltransferase 3 [Source:RGD Symbol;Acc:620413]
ENSRNOG00000020044	761.907	-0.284995	0.0709705	-4.01569	5.92722e-05	0.000187924	ENSRNOG00000020044	Mob2	MOB kinase activator 2 [Source:RGD Symbol;Acc:1562983]
ENSRNOG00000016595	32.4451	-0.00345076	0.295459	-0.0116793	0.990681	0.993281	ENSRNOG00000016595	Hhex	hematopoietically expressed homeobox [Source:RGD Symbol;Acc:619932]
ENSRNOG00000056940	1720.57	0.371695	0.101038	3.67875	0.00023438	0.000663826	ENSRNOG00000056940	Cited2	Cbp/p300-interacting transactivator, with Glu/Asp-rich carboxy-terminal domain, 2 [Source:RGD Symbol;Acc:620112]
ENSRNOG00000016102	265.014	0.178612	0.100514	1.77698	0.0755709	0.11963	ENSRNOG00000016102	Ebf3	EBF transcription factor 3 [Source:RGD Symbol;Acc:1304956]
ENSRNOG00000029490	642.297	-0.299323	0.0950201	-3.1501	0.00163213	0.00392531	ENSRNOG00000029490	Znf768	zinc finger protein 768 [Source:RGD Symbol;Acc:7609558]
ENSRNOG00000009462	525.072	0.150066	0.0712507	2.10618	0.0351891	0.0613634	ENSRNOG00000009462	Ccdc90b	coiled-coil domain containing 90B [Source:RGD Symbol;Acc:1308637]
ENSRNOG00000060429	481.539	0.121295	0.0722402	1.67906	0.0931406	0.143501	ENSRNOG00000060429	Zfp446	zinc finger protein 446 [Source:RGD Symbol;Acc:7612453]
ENSRNOG00000051450	114.183	-0.332486	0.1451	-2.29143	0.0219386	0.0402914	ENSRNOG00000051450	Abracl	ABRA C-terminal like [Source:RGD Symbol;Acc:1583256]
ENSRNOG00000061012	1235.6	-0.236114	0.0488914	-4.82936	1.36973e-06	5.65211e-06	ENSRNOG00000061012	Kat5	lysine acetyltransferase 5 [Source:RGD Symbol;Acc:621061]
ENSRNOG00000021118	2793.44	-0.143707	0.0430077	-3.34142	0.000833518	0.00212828	ENSRNOG00000021118	Nomo1	Nodal modulator 1 [Source:RGD Symbol;Acc:1305240]
ENSRNOG00000053735	64.6137	0.0304878	0.200823	0.151814	0.879334	0.910561	ENSRNOG00000053735	Hebp2	heme binding protein 2 [Source:RGD Symbol;Acc:1311553]
ENSRNOG00000015911	219.39	-0.0645911	0.112235	-0.575501	0.564953	0.649436	ENSRNOG00000015911	Lrp5	LDL receptor related protein 5 [Source:RGD Symbol;Acc:1309329]
ENSRNOG00000032034	5645.09	-0.040163	0.0447971	-0.896552	0.369958	0.459159	ENSRNOG00000032034	Supt5h	SPT5 homolog, DSIF elongation factor subunit [Source:RGD Symbol;Acc:1563807]
ENSRNOG00000061533	370.464	0.732561	0.110112	6.6529	2.8738e-11	2.2557e-10	ENSRNOG00000061533	Zfp945	zinc finger protein 945 [Source:RGD Symbol;Acc:2324317]
ENSRNOG00000009664	281.902	0.145989	0.111246	1.31231	0.189417	0.262655	ENSRNOG00000009664	Ankrd42	ankyrin repeat domain 42 [Source:RGD Symbol;Acc:1310789]
ENSRNOG00000021025	4817.89	-0.203594	0.05649	-3.60408	0.000313266	0.000868947	ENSRNOG00000021025	Ppp2r5b	protein phosphatase 2, regulatory subunit B', beta [Source:RGD Symbol;Acc:727786]
ENSRNOG00000011994	600.737	0.436029	0.295447	1.47583	0.13999	0.203647	ENSRNOG00000011994	Perp	p53 apoptosis effector related to PMP22 [Source:RGD Symbol;Acc:1310294]
ENSRNOG00000026572	26.295	0.0684595	0.303308	0.22571	0.821427	0.865347	ENSRNOG00000026572	Zfp473	zinc finger protein 473 [Source:RGD Symbol;Acc:1305084]
ENSRNOG00000020719	49.6497	-0.683248	0.227326	-3.00559	0.00265063	0.00611045	ENSRNOG00000020719	Hrc	histidine rich calcium binding protein [Source:RGD Symbol;Acc:727864]
ENSRNOG00000019560	1674.27	-0.0425965	0.0684496	-0.622304	0.533742	0.62113	ENSRNOG00000019560	Pde2a	phosphodiesterase 2A [Source:RGD Symbol;Acc:620965]
ENSRNOG00000046480	102.629	-0.68158	0.156446	-4.35666	1.32064e-05	4.67619e-05	ENSRNOG00000046480	Zfp764l1	zinc finger protein 764 like 1 [Source:RGD Symbol;Acc:1594599]
ENSRNOG00000016807	2556.2	-0.0952118	0.0445118	-2.13902	0.0324339	0.0570668	ENSRNOG00000016807	Oat	ornithine aminotransferase [Source:RGD Symbol;Acc:621724]
ENSRNOG00000015865	1336.54	-0.57995	0.0576635	-10.0575	8.51436e-24	2.5351e-22	ENSRNOG00000015865	Ap2s1	adaptor related protein complex 2 subunit sigma 1 [Source:RGD Symbol;Acc:620188]
ENSRNOG00000018007	989.767	-0.65205	0.0632173	-10.3144	6.0646e-25	2.00146e-23	ENSRNOG00000018007	Gtf2h5	general transcription factor IIH subunit 5 [Source:RGD Symbol;Acc:1560991]
ENSRNOG00000028753	191.631	-0.593037	0.115288	-5.14398	2.68981e-07	1.22672e-06	ENSRNOG00000028753	B9d2	B9 domain containing 2 [Source:RGD Symbol;Acc:1566122]
ENSRNOG00000020182	632.293	-0.177421	0.0835963	-2.12235	0.0338083	0.0592409	ENSRNOG00000020182	Mvp	major vault protein [Source:RGD Symbol;Acc:70932]
ENSRNOG00000013190	405.264	-0.133454	0.0890653	-1.49838	0.134035	0.19632	ENSRNOG00000013190	Rnaset2	ribonuclease T2 [Source:RGD Symbol;Acc:1309918]
ENSRNOG00000013795	355.537	0.227931	0.101598	2.24345	0.0248679	0.0451384	ENSRNOG00000013795	Asb7	ankyrin repeat and SOCS box-containing 7 [Source:RGD Symbol;Acc:1305154]
ENSRNOG00000060603	759.129	-0.129669	0.0665607	-1.94813	0.0513994	0.0854754	ENSRNOG00000060603	Nhsl1	NHS-like 1 [Source:RGD Symbol;Acc:1308124]
ENSRNOG00000019970	669.502	-0.147941	0.0696034	-2.12549	0.0335457	0.0588447	ENSRNOG00000019970	mrpl11	mitochondrial ribosomal protein L11 [Source:RGD Symbol;Acc:1359665]
ENSRNOG00000061348	177.837	-0.247015	0.11702	-2.11089	0.0347821	0.0607738	ENSRNOG00000061348	Fam53b	family with sequence similarity 53, member B [Source:RGD Symbol;Acc:1310799]
ENSRNOG00000031003	246.11	-0.0566521	0.0968461	-0.58497	0.558568	0.644507	ENSRNOG00000031003	Zfp764	zinc finger protein 764 [Source:RGD Symbol;Acc:7540019]
ENSRNOG00000020652	67.7589	0.142447	0.207161	0.687615	0.491695	0.581	ENSRNOG00000020652	Tgfb1	transforming growth factor, beta 1 [Source:RGD Symbol;Acc:69051]
ENSRNOG00000062473	145.431	-0.719109	0.173414	-4.14678	3.37179e-05	0.000111378	ENSRNOG00000062473	Bbc3	Bcl-2 binding component 3 [Source:RGD Symbol;Acc:631434]
ENSRNOG00000060972	1012.38	0.37033	0.0691372	5.35646	8.48693e-08	4.15925e-07	ENSRNOG00000060972	Heca	hdc homolog, cell cycle regulator [Source:RGD Symbol;Acc:1304818]
ENSRNOG00000011975	340.304	0.0309678	0.0772222	0.401021	0.688404	0.755891	ENSRNOG00000011975	Crtc3	CREB regulated transcription coactivator 3 [Source:RGD Symbol;Acc:1309666]
ENSRNOG00000019132	479.19	0.325122	0.0752144	4.3226	1.542e-05	5.39552e-05	ENSRNOG00000019132	Fv1	Friend virus susceptibility 1 [Source:RGD Symbol;Acc:1309326]
ENSRNOG00000016368	201.082	-0.435391	0.118657	-3.66933	0.000243191	0.000687039	ENSRNOG00000016368	Ppp1r14c	protein phosphatase 1, regulatory (inhibitor) subunit 14c [Source:RGD Symbol;Acc:620538]
ENSRNOG00000021145	904.263	-0.300129	0.0889274	-3.37499	0.000738177	0.00190901	ENSRNOG00000021145	Gpr137	G protein-coupled receptor 137 [Source:RGD Symbol;Acc:1586317]
ENSRNOG00000054391	17376	-0.236028	0.0363783	-6.48817	8.68857e-11	6.43708e-10	ENSRNOG00000054391	Snrpn	small nuclear ribonucleoprotein polypeptide N [Source:RGD Symbol;Acc:621306]
ENSRNOG00000020731	2138.06	-0.190832	0.0500968	-3.80928	0.000139375	0.000412191	ENSRNOG00000020731	Ppfia3	PTPRF interacting protein alpha 3 [Source:RGD Symbol;Acc:620054]
ENSRNOG00000033343	41.5284	0.159052	0.22342	0.7119	0.476527	0.566859	ENSRNOG00000033343	Prss36	serine protease 36 [Source:RGD Symbol;Acc:1593186]
ENSRNOG00000019578	7351.77	-0.425949	0.0429766	-9.91119	3.722e-23	1.03737e-21	ENSRNOG00000019578	Rps16	ribosomal protein S16 [Source:RGD Symbol;Acc:621031]
ENSRNOG00000017137	351.852	0.0892636	0.0910167	0.980739	0.326722	0.414402	ENSRNOG00000017137	Eef1akmt2	EEF1A lysine methyltransferase 2 [Source:RGD Symbol;Acc:1306300]
ENSRNOG00000020897	6583.09	-0.196014	0.0338233	-5.79526	6.82165e-09	3.92617e-08	ENSRNOG00000020897	Prpf19	pre-mRNA processing factor 19 [Source:RGD Symbol;Acc:708496]
ENSRNOG00000014186	247.386	-0.182205	0.0959858	-1.89825	0.0576636	0.0945285	ENSRNOG00000014186	Zswim9	zinc finger SWIM-type containing 9 [Source:RGD Symbol;Acc:1310257]
ENSRNOG00000012055	3969.36	0.067745	0.0546613	1.23936	0.215213	0.293437	ENSRNOG00000012055	Man2a2	mannosidase, alpha, class 2A, member 2 [Source:RGD Symbol;Acc:1310238]
ENSRNOG00000017753	586.757	0.131621	0.0876415	1.50181	0.133146	0.195334	ENSRNOG00000017753	Ercc2	ERCC excision repair 2, TFIIH core complex helicase subunit [Source:RGD Symbol;Acc:1309109]
ENSRNOG00000051915	260.273	0.193059	0.105192	1.8353	0.0664619	0.10703	ENSRNOG00000051915	Spred3	sprouty-related, EVH1 domain containing 3 [Source:RGD Symbol;Acc:1311713]
ENSRNOG00000020746	227.978	-0.342627	0.109239	-3.13649	0.00170985	0.00410122	ENSRNOG00000020746	Lin7b	lin-7 homolog B, crumbs cell polarity complex component [Source:RGD Symbol;Acc:620730]
ENSRNOG00000011411	644.355	0.378289	0.0768146	4.9247	8.44883e-07	3.58101e-06	ENSRNOG00000011411	Adgrg6	adhesion G protein-coupled receptor G6 [Source:RGD Symbol;Acc:1308551]
ENSRNOG00000068342	268.69	-0.167704	0.0926023	-1.81101	0.0701386	0.112106	ENSRNOG00000068342	Coa4	cytochrome c oxidase assembly factor 4 homolog [Source:RGD Symbol;Acc:1562228]
ENSRNOG00000026517	881.451	-0.237656	0.0581423	-4.08749	4.36059e-05	0.000141529	ENSRNOG00000026517	Vrk3	VRK serine/threonine kinase 3 [Source:RGD Symbol;Acc:1549692]
ENSRNOG00000021147	702.172	-0.543553	0.0927634	-5.85956	4.64086e-09	2.72944e-08	ENSRNOG00000021147	Bad	BCL2-associated agonist of cell death [Source:RGD Symbol;Acc:620103]
ENSRNOG00000018106	114.729	0.139969	0.158787	0.881489	0.378053	0.467448	ENSRNOG00000018106	Neu3	neuraminidase 3 [Source:RGD Symbol;Acc:619881]
ENSRNOG00000017621	2021.29	0.124447	0.0725009	1.71649	0.0860715	0.134089	ENSRNOG00000017621	Spns1	sphingolipid transporter 1 [Source:RGD Symbol;Acc:1305613]
ENSRNOG00000024056	552.978	0.31415	0.0835829	3.75854	0.000170906	0.000496942	ENSRNOG00000024056	Zfp715	zinc finger protein 715 [Source:RGD Symbol;Acc:1624201]
ENSRNOG00000010964	387.501	0.250073	0.0895985	2.79104	0.00525393	0.0113547	ENSRNOG00000010964	Akap13	A-kinase anchoring protein 13 [Source:RGD Symbol;Acc:727893]
ENSRNOG00000018411	558.879	-0.0716106	0.0740845	-0.966607	0.333741	0.422184	ENSRNOG00000018411	Pold3	DNA polymerase delta 3, accessory subunit [Source:RGD Symbol;Acc:1312027]
ENSRNOG00000014530	1315.41	0.23858	0.0759172	3.14264	0.00167433	0.00401999	ENSRNOG00000014530	Nav2	neuron navigator 2 [Source:RGD Symbol;Acc:619778]
ENSRNOG00000011675	539.713	0.671429	0.0769788	8.72226	2.72698e-18	4.69176e-17	ENSRNOG00000011675	Zfp40	zinc finger protein 40 [Source:RGD Symbol;Acc:1593410]
ENSRNOG00000017446	1145.24	-0.693671	0.0890855	-7.78658	6.88462e-15	8.26895e-14	ENSRNOG00000017446	Ndufs8	NADH:ubiquinone oxidoreductase core subunit S8 [Source:RGD Symbol;Acc:1309436]
ENSRNOG00000016244	11661.5	-0.149222	0.038918	-3.83426	0.000125941	0.000376141	ENSRNOG00000016244	Mical2	microtubule associated monooxygenase, calponin and LIM domain containing 2 [Source:RGD Symbol;Acc:1311773]
ENSRNOG00000016815	1150.07	0.235594	0.0509817	4.62116	3.81607e-06	1.47801e-05	ENSRNOG00000016815	Tmem135	transmembrane protein 135 [Source:RGD Symbol;Acc:1309948]
ENSRNOG00000018936	460.081	0.481907	0.0901067	5.34818	8.88429e-08	4.33789e-07	ENSRNOG00000018936	Zfp780b-ps1	zinc finger protein 780B, pseudogene 1 [Source:RGD Symbol;Acc:2321719]
ENSRNOG00000014193	1125.68	-0.00247265	0.0586315	-0.0421726	0.966361	0.976719	ENSRNOG00000014193	Lig1	DNA ligase 1 [Source:RGD Symbol;Acc:621424]
ENSRNOG00000014908	614.573	-0.770526	0.0926667	-8.31502	9.1738e-17	1.35517e-15	ENSRNOG00000014908	Sf3b5	splicing factor 3b, subunit 5 [Source:RGD Symbol;Acc:1586993]
ENSRNOG00000064302	63.4552	0.679816	0.1959	3.47022	0.000520028	0.00138786	ENSRNOG00000064302
ENSRNOG00000018379	143.513	-0.641856	0.146962	-4.36751	1.25673e-05	4.46186e-05	ENSRNOG00000018379	Zfp688	zinc finger protein 688 [Source:RGD Symbol;Acc:1310765]
ENSRNOG00000053084	269.904	-0.251729	0.0998682	-2.52061	0.0117151	0.023227	ENSRNOG00000053084	Fuz	fuzzy planar cell polarity protein [Source:RGD Symbol;Acc:1310608]
ENSRNOG00000012322	185.992	-0.297774	0.117869	-2.52632	0.0115265	0.0228906	ENSRNOG00000012322	Pex7	peroxisomal biogenesis factor 7 [Source:RGD Symbol;Acc:1308483]
ENSRNOG00000019254	483.941	-0.144334	0.0893454	-1.61546	0.106212	0.160925	ENSRNOG00000019254	Dyrk1b	dual specificity tyrosine phosphorylation regulated kinase 1B [Source:RGD Symbol;Acc:1307223]
ENSRNOG00000017243	3188.07	0.26285	0.0429378	6.12166	9.26079e-10	5.98735e-09	ENSRNOG00000017243	Bnip3	BCL2 interacting protein 3 [Source:RGD Symbol;Acc:620800]
ENSRNOG00000011526	1715.41	-0.191685	0.0674586	-2.84152	0.0044899	0.00987098	ENSRNOG00000011526	Pcsk6	proprotein convertase subtilisin/kexin type 6 [Source:RGD Symbol;Acc:3246]
ENSRNOG00000053366	308.477	0.149438	0.108637	1.37558	0.168952	0.238559	ENSRNOG00000053366	Zfp59	zinc finger protein 59 [Source:RGD Symbol;Acc:1591403]
ENSRNOG00000011882	660.201	0.153569	0.0649051	2.36605	0.0179788	0.033778	ENSRNOG00000011882	Gab2	GRB2-associated binding protein 2 [Source:RGD Symbol;Acc:621367]
ENSRNOG00000018766	343.623	-0.00236586	0.0977102	-0.024213	0.980683	0.986201	ENSRNOG00000018766	Rrp8	ribosomal RNA processing 8 [Source:RGD Symbol;Acc:1308302]
ENSRNOG00000021103	6445.62	-0.5025	0.0742714	-6.76573	1.3264e-11	1.08206e-10	ENSRNOG00000021103	Nrxn2	neurexin 2 [Source:RGD Symbol;Acc:620211]
ENSRNOG00000049517	384.631	-0.0649989	0.11299	-0.575264	0.565113	0.649517	ENSRNOG00000049517	Tnfaip3	TNF alpha induced protein 3 [Source:RGD Symbol;Acc:1589275]
ENSRNOG00000017512	34.9454	-0.0743397	0.267414	-0.277995	0.781017	0.832255	ENSRNOG00000017512	Aldh3b1	aldehyde dehydrogenase 3 family, member B1 [Source:RGD Symbol;Acc:1359546]
ENSRNOG00000063236	68.453	0.682167	0.215845	3.16045	0.00157524	0.00380158	ENSRNOG00000063236
ENSRNOG00000037580	1844.89	-0.473634	0.0667014	-7.10081	1.24026e-12	1.14059e-11	ENSRNOG00000037580	Psmd8	proteasome 26S subunit, non-ATPase 8 [Source:RGD Symbol;Acc:1309842]
ENSRNOG00000012074	731.228	-0.280775	0.0662176	-4.24018	2.23336e-05	7.59677e-05	ENSRNOG00000012074	Ifngr1	interferon gamma receptor 1 [Source:RGD Symbol;Acc:620570]
ENSRNOG00000017012	456.891	-0.343732	0.083704	-4.10652	4.01671e-05	0.000130983	ENSRNOG00000017012	Coq7	coenzyme Q7, hydroxylase [Source:RGD Symbol;Acc:2381]
ENSRNOG00000068955	2420.97	-0.779524	0.043764	-17.812	5.70496e-71	5.91727e-68	ENSRNOG00000068955	Rps13	ribosomal protein S13 [Source:RGD Symbol;Acc:621027]
ENSRNOG00000019730	960.829	-0.0301127	0.0638008	-0.471979	0.636942	0.712708	ENSRNOG00000019730	Inppl1	inositol polyphosphate phosphatase-like 1 [Source:RGD Symbol;Acc:68396]
ENSRNOG00000019776	390.903	-0.130734	0.0907615	-1.44041	0.14975	0.215385	ENSRNOG00000019776	Sh3gl3	SH3 domain containing GRB2 like 3, endophilin A3 [Source:RGD Symbol;Acc:620578]
ENSRNOG00000014030	1566.22	0.00791168	0.098671	0.0801824	0.936092	0.952624	ENSRNOG00000014030	Synm	synemin [Source:RGD Symbol;Acc:727872]
ENSRNOG00000049944	4684.51	-0.17229	0.0583464	-2.95288	0.0031482	0.00715078	ENSRNOG00000049944	Slc25a22	solute carrier family 25 member 22 [Source:RGD Symbol;Acc:1307826]
ENSRNOG00000023968	54.044	0.1445	0.201363	0.717613	0.472996	0.563397	ENSRNOG00000023968	Fancf	FA complementation group F [Source:RGD Symbol;Acc:1561456]
ENSRNOG00000026243	4427.48	-0.178155	0.0574774	-3.09957	0.00193804	0.00459465	ENSRNOG00000026243	Ap2a1	adaptor related protein complex 2 subunit alpha 1 [Source:RGD Symbol;Acc:1306254]
ENSRNOG00000066277	543.72	0.00901167	0.0870224	0.103556	0.917522	0.939348	ENSRNOG00000066277	Zfp689	zinc finger protein 689 [Source:RGD Symbol;Acc:628696]
ENSRNOG00000016717	113.23	0.524685	0.154025	3.40649	0.000658047	0.00172109	ENSRNOG00000016717	Gas2	growth arrest-specific 2 [Source:RGD Symbol;Acc:1563167]
ENSRNOG00000055371	3972.19	-0.278514	0.0735774	-3.78532	0.000153509	0.000450779	ENSRNOG00000055371	Sptbn4	spectrin, beta, non-erythrocytic 4 [Source:RGD Symbol;Acc:1304682]
ENSRNOG00000020533	1408.72	-0.187891	0.0814831	-2.30588	0.0211171	0.038909	ENSRNOG00000020533	Htra1	HtrA serine peptidase 1 [Source:RGD Symbol;Acc:69235]
ENSRNOG00000059224	1428.78	0.0559665	0.0628667	0.890241	0.373337	0.46268	ENSRNOG00000059224	Reps1	RALBP1 associated Eps domain containing 1 [Source:RGD Symbol;Acc:1307131]
ENSRNOG00000018960	69219.5	0.629629	0.0838024	7.51326	5.76739e-14	6.18525e-13	ENSRNOG00000018960	Syne1	spectrin repeat containing nuclear envelope protein 1 [Source:RGD Symbol;Acc:620546]
ENSRNOG00000037080	26.2828	0.459092	0.313041	1.46656	0.142497	0.206796	ENSRNOG00000037080	Adamts17	ADAM metallopeptidase with thrombospondin type 1 motif, 17 [Source:RGD Symbol;Acc:1308783]
ENSRNOG00000050453	222.828	-0.0490262	0.0981329	-0.499589	0.617364	0.695967	ENSRNOG00000050453	Fbxo27	F-box protein 27 [Source:RGD Symbol;Acc:1563982]
ENSRNOG00000014061	1381.17	-0.367585	0.0715516	-5.13735	2.78645e-07	1.26681e-06	ENSRNOG00000014061	Dusp5	dual specificity phosphatase 5 [Source:RGD Symbol;Acc:620854]
ENSRNOG00000018873	6144.51	0.180715	0.043179	4.18524	2.84861e-05	9.51349e-05	ENSRNOG00000018873	Fam168a	family with sequence similarity 168, member A [Source:RGD Symbol;Acc:1308929]
ENSRNOG00000042776	123.879	0.173818	0.146498	1.18648	0.235431	0.316107	ENSRNOG00000042776	Lins1	lines homolog 1 [Source:RGD Symbol;Acc:1308792]
ENSRNOG00000021004	283.456	-0.145209	0.0985244	-1.47383	0.140526	0.204263	ENSRNOG00000021004	Rasip1	Ras interacting protein 1 [Source:RGD Symbol;Acc:1305291]
ENSRNOG00000063590	161.571	0.234078	0.165538	1.41405	0.157349	0.224667	ENSRNOG00000063590	Fzd4	frizzled class receptor 4 [Source:RGD Symbol;Acc:71017]
ENSRNOG00000018994	2225.53	-0.296501	0.04919	-6.02767	1.66344e-09	1.03937e-08	ENSRNOG00000018994	Psmc4	proteasome 26S subunit, ATPase 4 [Source:RGD Symbol;Acc:621102]
ENSRNOG00000017703	196.394	-0.250538	0.11091	-2.25893	0.023888	0.0435776	ENSRNOG00000017703	Unc93b1	unc-93 homolog B1, TLR signaling regulator [Source:RGD Symbol;Acc:1311984]
ENSRNOG00000019746	1654.51	-0.130131	0.0513329	-2.53505	0.0112432	0.0223616	ENSRNOG00000019746	Paf1	PAF1 homolog, Paf1/RNA polymerase II complex component [Source:RGD Symbol;Acc:1306219]
ENSRNOG00000013836	486.757	0.549648	0.100434	5.47274	4.43121e-08	2.2625e-07	ENSRNOG00000013836	Arhgap17	Rho GTPase activating protein 17 [Source:RGD Symbol;Acc:628767]
ENSRNOG00000011945	1902.68	0.287013	0.0531433	5.40073	6.637e-08	3.31188e-07	ENSRNOG00000011945	Cyfip1	cytoplasmic FMR1 interacting protein 1 [Source:RGD Symbol;Acc:1310332]
ENSRNOG00000029366	15490.6	0.194549	0.059463	3.27177	0.00106876	0.00267071	ENSRNOG00000029366	Prrt2	proline-rich transmembrane protein 2 [Source:RGD Symbol;Acc:1564195]
ENSRNOG00000058388	168.897	-0.441095	0.160088	-2.75533	0.00586329	0.0125391	ENSRNOG00000058388	Zfp36	zinc finger protein 36 [Source:RGD Symbol;Acc:620722]
ENSRNOG00000028470	45.1676	-0.0793091	0.246415	-0.321852	0.747565	0.805475	ENSRNOG00000028470	Gdpd4	glycerophosphodiester phosphodiesterase domain containing 4 [Source:RGD Symbol;Acc:1585799]
ENSRNOG00000020848	474.281	-0.0196241	0.0874227	-0.224474	0.822389	0.865903	ENSRNOG00000020848	Coq8b	coenzyme Q8B [Source:RGD Symbol;Acc:1311356]
ENSRNOG00000018518	948.657	-0.0721241	0.067985	-1.06088	0.288743	0.373994	ENSRNOG00000018518	Prr14	proline rich 14 [Source:RGD Symbol;Acc:1594592]
ENSRNOG00000019702	459.829	-0.10701	0.0910483	-1.17531	0.239871	0.320959	ENSRNOG00000019702	Med29	mediator complex subunit 29 [Source:RGD Symbol;Acc:1311009]
ENSRNOG00000055142	28.672	-0.105167	0.273997	-0.383826	0.701108	0.766651	ENSRNOG00000055142	Ect2l	epithelial cell transforming 2 like [Source:RGD Symbol;Acc:9246970]
ENSRNOG00000012690	748.313	0.568309	0.0663263	8.56838	1.0495e-17	1.69708e-16	ENSRNOG00000012690	Nipa2	NIPA magnesium transporter 2 [Source:RGD Symbol;Acc:1306051]
ENSRNOG00000017097	661.484	-0.274175	0.0736344	-3.72346	0.000196512	0.000565733	ENSRNOG00000017097	Lhpp	phospholysine phosphohistidine inorganic pyrophosphate phosphatase [Source:RGD Symbol;Acc:1359187]
ENSRNOG00000018850	468.457	-0.556649	0.103998	-5.35251	8.67445e-08	4.24256e-07	ENSRNOG00000018850	Ttc9b	tetratricopeptide repeat domain 9B [Source:RGD Symbol;Acc:1306256]
ENSRNOG00000020486	19.6295	0.0954726	0.348412	0.274022	0.784068	0.834584	ENSRNOG00000020486	Bcl2l12	Bcl2 like 12 [Source:RGD Symbol;Acc:1307361]
ENSRNOG00000060599	1200.14	0.526585	0.0854395	6.16325	7.1269e-10	4.67222e-09	ENSRNOG00000060599	Gabrb3	gamma-aminobutyric acid type A receptor subunit beta 3 [Source:RGD Symbol;Acc:2651]
ENSRNOG00000042702	2182.83	0.642453	0.0513734	12.5056	6.96032e-36	6.0886e-34	ENSRNOG00000042702	Nipa1	NIPA magnesium transporter 1 [Source:RGD Symbol;Acc:1305401]
ENSRNOG00000019949	222.332	-0.784769	0.124529	-6.3019	2.9401e-10	2.04079e-09	ENSRNOG00000019949	Mrps12	mitochondrial ribosomal protein S12 [Source:RGD Symbol;Acc:1306221]
ENSRNOG00000025126	135.385	0.153626	0.154737	0.992822	0.320797	0.408228	ENSRNOG00000025126	Palb2	partner and localizer of BRCA2 [Source:RGD Symbol;Acc:1304759]
ENSRNOG00000020867	686.887	-0.340636	0.0934688	-3.64438	0.000268036	0.000751527	ENSRNOG00000020867	Numbl	NUMB-like, endocytic adaptor protein [Source:RGD Symbol;Acc:1307579]
ENSRNOG00000015807	226.518	0.279465	0.115462	2.42041	0.0155028	0.0297301	ENSRNOG00000015807	Pyroxd2	pyridine nucleotide-disulphide oxidoreductase domain 2 [Source:RGD Symbol;Acc:1303232]
ENSRNOG00000025651	887.84	0.548701	0.0612762	8.95454	3.41145e-19	6.39195e-18	ENSRNOG00000025651	Ikzf5	IKAROS family zinc finger 5 [Source:RGD Symbol;Acc:1310965]
ENSRNOG00000011282	10154.6	-0.362851	0.0409592	-8.85885	8.08417e-19	1.46008e-17	ENSRNOG00000011282	Ppp2r1a	protein phosphatase 2 scaffold subunit A alpha [Source:RGD Symbol;Acc:620907]
ENSRNOG00000019962	365.373	-0.316393	0.123688	-2.55799	0.0105278	0.0211035	ENSRNOG00000019962	Sars2	seryl-tRNA synthetase 2, mitochondrial [Source:RGD Symbol;Acc:1309456]
ENSRNOG00000023521	1843.12	-0.618843	0.100947	-6.13038	8.76693e-10	5.68832e-09	ENSRNOG00000023521	Map3k10	mitogen activated protein kinase kinase kinase 10 [Source:RGD Symbol;Acc:1308381]
ENSRNOG00000055028	1843.32	0.13679	0.0525254	2.60427	0.00920698	0.0187341	ENSRNOG00000055028	Setd1a	SET domain containing 1A, histone lysine methyltransferase [Source:RGD Symbol;Acc:1311624]
ENSRNOG00000015560	1588.17	0.285807	0.0562512	5.08092	3.75621e-07	1.67518e-06	ENSRNOG00000015560	Emsy	EMSY transcriptional repressor, BRCA2 interacting [Source:RGD Symbol;Acc:1310712]
ENSRNOG00000032723	385.936	-0.0660916	0.0850602	-0.776997	0.43716	0.527374	ENSRNOG00000032723	Efl1	elongation factor like GTPase 1 [Source:RGD Symbol;Acc:1306521]
ENSRNOG00000043388	1168.51	0.360353	0.0885667	4.06872	4.72723e-05	0.00015261	ENSRNOG00000043388	Irf3	interferon regulatory factor 3 [Source:RGD Symbol;Acc:1549774]
ENSRNOG00000042728	1502.66	-0.0921154	0.0654064	-1.40835	0.159026	0.226794	ENSRNOG00000042728	Fbrs	fibrosin [Source:RGD Symbol;Acc:1594591]
ENSRNOG00000011460	2001.69	1.33736	0.103364	12.9384	2.73321e-38	2.795e-36	ENSRNOG00000011460	Arfgef3	ARFGEF family member 3 [Source:RGD Symbol;Acc:1309903]
ENSRNOG00000013009	2772.14	-0.548226	0.0522292	-10.4965	8.96001e-26	3.18893e-24	ENSRNOG00000013009	Ldha	lactate dehydrogenase A [Source:RGD Symbol;Acc:2996]
ENSRNOG00000020615	3857.37	-0.303473	0.04355	-6.9684	3.20575e-12	2.80595e-11	ENSRNOG00000020615	Nap1l4	nucleosome assembly protein 1-like 4 [Source:RGD Symbol;Acc:1305391]
ENSRNOG00000017109	69.6651	-0.484535	0.186394	-2.59951	0.00933556	0.018965	ENSRNOG00000017109	Rassf7	Ras association domain family member 7 [Source:RGD Symbol;Acc:1306244]
ENSRNOG00000021117	1026.58	-0.314546	0.0629324	-4.99816	5.78799e-07	2.50663e-06	ENSRNOG00000021117	Rps6ka4	ribosomal protein S6 kinase A4 [Source:RGD Symbol;Acc:1307277]
ENSRNOG00000025378	155.27	0.0970015	0.14349	0.676018	0.499029	0.588411	ENSRNOG00000025378	Kash5	KASH domain containing 5 [Source:RGD Symbol;Acc:1561972]
ENSRNOG00000020130	1379.43	0.196357	0.0799608	2.45567	0.0140624	0.0272739	ENSRNOG00000020130	Arhgef1	Rho guanine nucleotide exchange factor 1 [Source:RGD Symbol;Acc:620951]
ENSRNOG00000019529	4516.22	0.113532	0.0554582	2.04716	0.0406428	0.069514	ENSRNOG00000019529	Btbd1	BTB domain containing 1 [Source:RGD Symbol;Acc:1310962]
ENSRNOG00000010803	22.9386	0.571301	0.373862	1.52811	0.126486	0.18698	ENSRNOG00000010803	Gabra5	gamma-aminobutyric acid type A receptor subunit alpha 5 [Source:RGD Symbol;Acc:61859]
ENSRNOG00000016374	2265.71	0.0942707	0.0620409	1.51949	0.128638	0.18964	ENSRNOG00000016374	Fgfr2	fibroblast growth factor receptor 2 [Source:RGD Symbol;Acc:2611]
ENSRNOG00000026114	276.194	-0.147297	0.129629	-1.1363	0.255832	0.338925	ENSRNOG00000026114	Ap5b1	adaptor related protein complex 5 subunit beta 1 [Source:RGD Symbol;Acc:1562657]
ENSRNOG00000020557	1184.87	0.361986	0.058048	6.23597	4.48974e-10	3.02672e-09	ENSRNOG00000020557	Ryr1	ryanodine receptor 1 [Source:RGD Symbol;Acc:1586637]
ENSRNOG00000056946	2427.7	-0.495684	0.0954552	-5.19284	2.0711e-07	9.6238e-07	ENSRNOG00000056946	Scaf1	SR-related CTD-associated factor 1 [Source:RGD Symbol;Acc:708405]
ENSRNOG00000058030	640.558	0.506508	0.0772613	6.55578	5.53513e-11	4.19716e-10	ENSRNOG00000058030	Zfp748-ps1	zinc finger protein 748, pseudogene 1 [Source:RGD Symbol;Acc:1585783]
ENSRNOG00000011313	354.903	0.363086	0.100156	3.6252	0.000288741	0.000804917	ENSRNOG00000011313	Sorcs1	sortilin-related VPS10 domain containing receptor 1 [Source:RGD Symbol;Acc:1305910]
ENSRNOG00000049179	312.244	0.144704	0.109005	1.3275	0.184343	0.256452	ENSRNOG00000049179	Pidd1	p53-induced death domain protein 1 [Source:RGD Symbol;Acc:1311792]
ENSRNOG00000032246	50.4423	0.326714	0.253217	1.29025	0.196963	0.271537	ENSRNOG00000032246	Acsm3	acyl-CoA synthetase medium-chain family member 3 [Source:RGD Symbol;Acc:62086]
ENSRNOG00000020660	13171.4	-0.482494	0.042312	-11.4032	4.02838e-30	2.19087e-28	ENSRNOG00000020660	Cfl1	cofilin 1 [Source:RGD Symbol;Acc:69285]
ENSRNOG00000025075	263.615	-0.0571621	0.121745	-0.469522	0.638696	0.714358	ENSRNOG00000025075	Relt	RELT, TNF receptor [Source:RGD Symbol;Acc:1305381]
ENSRNOG00000019426	453.921	-0.232474	0.0809842	-2.87061	0.00409684	0.00907832	ENSRNOG00000019426	Ramac	RNA guanine-7 methyltransferase activating subunit [Source:RGD Symbol;Acc:1310022]
ENSRNOG00000013718	7182.09	0.494838	0.0531102	9.31719	1.19463e-20	2.57378e-19	ENSRNOG00000013718	Herc2	HECT and RLD domain containing E3 ubiquitin protein ligase 2 [Source:RGD Symbol;Acc:1307989]
ENSRNOG00000037247	145.899	-0.420682	0.129216	-3.25565	0.00113133	0.00281398	ENSRNOG00000037247	Rras	RAS related [Source:RGD Symbol;Acc:1311443]
ENSRNOG00000065597	57.7902	0.0462969	0.205997	0.224745	0.822177	0.865823	ENSRNOG00000065597
ENSRNOG00000052273	422.574	-0.258354	0.0833184	-3.1008	0.00192996	0.00457699	ENSRNOG00000052273	C1h15orf40	similar to human chromosome 15 open reading frame 40 [Source:RGD Symbol;Acc:1305713]
ENSRNOG00000013969	3597.5	0.5364	0.0523797	10.2406	1.3041e-24	4.18033e-23	ENSRNOG00000013969	Ahi1	Abelson helper integration site 1 [Source:RGD Symbol;Acc:1303040]
ENSRNOG00000018462	387.85	-0.304524	0.109005	-2.79367	0.00521137	0.0112812	ENSRNOG00000018462	Rabep2	rabaptin, RAB GTPase binding effector protein 2 [Source:RGD Symbol;Acc:621416]
ENSRNOG00000016429	93.7768	0.761716	0.187109	4.07097	4.68174e-05	0.000151209	ENSRNOG00000016429	Grm5	glutamate metabotropic receptor 5 [Source:RGD Symbol;Acc:2746]
ENSRNOG00000012366	1758.73	-0.26033	0.0487121	-5.34425	9.07928e-08	4.42862e-07	ENSRNOG00000012366	Mesd	mesoderm development LRP chaperone [Source:RGD Symbol;Acc:1310344]
ENSRNOG00000019080	327.637	0.0416559	0.111991	0.371957	0.709925	0.774168	ENSRNOG00000019080	Hsd3b7	hydroxy-delta-5-steroid dehydrogenase, 3 beta- and steroid delta-isomerase 7 [Source:RGD Symbol;Acc:628727]
ENSRNOG00000059492	509.043	0.337285	0.0826925	4.07879	4.52717e-05	0.000146575	ENSRNOG00000059492	LOC100365363	vomeronasal 1 receptor, F4-like [Source:RGD Symbol;Acc:2319215]
ENSRNOG00000020489	2685.31	0.412651	0.0796151	5.18307	2.18264e-07	1.0084e-06	ENSRNOG00000020489	Tmem145	transmembrane protein 145 [Source:RGD Symbol;Acc:1595911]
ENSRNOG00000018993	2519.33	-0.0998098	0.0490052	-2.03672	0.0416783	0.0710283	ENSRNOG00000018993	Ilk	integrin-linked kinase [Source:RGD Symbol;Acc:620063]
ENSRNOG00000018916	515.894	0.178731	0.0810965	2.20393	0.0275294	0.049395	ENSRNOG00000018916	Bcl7c	BAF chromatin remodeling complex subunit BCL7C [Source:RGD Symbol;Acc:1308439]
ENSRNOG00000066224	177.392	0.650586	0.148367	4.38497	1.16004e-05	4.14391e-05	ENSRNOG00000066224	LOC102548728	zinc finger protein 845-like [Source:RGD Symbol;Acc:7537348]
ENSRNOG00000014673	299.902	0.383707	0.103068	3.72287	0.000196972	0.000566944	ENSRNOG00000014673	Eri2	ERI1 exoribonuclease family member 2 [Source:RGD Symbol;Acc:1583889]
ENSRNOG00000016206	978.021	-0.179984	0.056572	-3.18151	0.0014651	0.00355527	ENSRNOG00000016206	Uvrag	UV radiation resistance associated [Source:RGD Symbol;Acc:1589754]
ENSRNOG00000016210	121.882	0.14225	0.154274	0.922066	0.356494	0.445572	ENSRNOG00000016210	Mical2	microtubule associated monooxygenase, calponin and LIM domain containing 2 [Source:RGD Symbol;Acc:1311773]
ENSRNOG00000019145	3699.66	0.212168	0.0487524	4.35195	1.34933e-05	4.76614e-05	ENSRNOG00000019145	Kdm2a	lysine demethylase 2A [Source:RGD Symbol;Acc:1309419]
ENSRNOG00000019674	514.395	-0.275711	0.076385	-3.60949	0.000306796	0.000852303	ENSRNOG00000019674	Mfsd13a	major facilitator superfamily domain containing 13A [Source:RGD Symbol;Acc:1309313]
ENSRNOG00000020617	418.812	-0.154272	0.089607	-1.72165	0.0851329	0.132812	ENSRNOG00000020617	Mus81	MUS81 structure-specific endonuclease subunit [Source:RGD Symbol;Acc:1311957]
ENSRNOG00000017021	203.672	-0.389272	0.12701	-3.06488	0.00217755	0.00510168	ENSRNOG00000017021	Galnt18	polypeptide N-acetylgalactosaminyltransferase 18 [Source:RGD Symbol;Acc:1309623]
ENSRNOG00000011932	525.018	-0.376718	0.0821622	-4.58505	4.53871e-06	1.73165e-05	ENSRNOG00000011932	Snrpa1	small nuclear ribonucleoprotein polypeptide A' [Source:RGD Symbol;Acc:2320494]
ENSRNOG00000013436	111.034	0.0492342	0.13748	0.358117	0.720255	0.782612	ENSRNOG00000013436	Pde7b	phosphodiesterase 7B [Source:RGD Symbol;Acc:621016]
ENSRNOG00000065747	38.0871	2.48222	0.29985	8.27819	1.25064e-16	1.81243e-15	ENSRNOG00000065747
ENSRNOG00000013381	2124.67	-0.147876	0.040194	-3.67906	0.000234091	0.000663135	ENSRNOG00000013381	Tsg101	tumor susceptibility 101 [Source:RGD Symbol;Acc:3909]
ENSRNOG00000020479	1256.68	0.962913	0.0618254	15.5747	1.08137e-54	3.48947e-52	ENSRNOG00000020479	Pik3c2a	phosphatidylinositol-4-phosphate 3-kinase, catalytic subunit type 2 alpha [Source:RGD Symbol;Acc:1310389]
ENSRNOG00000036859	913.225	-0.286517	0.105859	-2.70659	0.00679787	0.0142916	ENSRNOG00000036859	Gdpd5	glycerophosphodiester phosphodiesterase domain containing 5 [Source:RGD Symbol;Acc:1559673]
ENSRNOG00000019883	193.071	-0.422349	0.128173	-3.29515	0.000983704	0.00247863	ENSRNOG00000019883	Pak4	p21 (RAC1) activated kinase 4 [Source:RGD Symbol;Acc:1307705]
ENSRNOG00000016683	108.877	-0.270592	0.146017	-1.85316	0.0638597	0.103413	ENSRNOG00000016683	Zfp668	zinc finger protein 668 [Source:RGD Symbol;Acc:1308623]
ENSRNOG00000051867	41.6995	1.29262	0.25438	5.08146	3.74548e-07	1.67091e-06	ENSRNOG00000051867	Zfp758	zinc finger protein 600 [Source:RGD Symbol;Acc:9286049]
ENSRNOG00000045741	69.3204	0.412642	0.194701	2.11936	0.0340599	0.0596459	ENSRNOG00000045741	AABR07071891.2
ENSRNOG00000057384	450.024	0.163443	0.0732198	2.23222	0.0256003	0.046323	ENSRNOG00000057384	Nfatc2ip	nuclear factor of activated T-cells 2 interacting protein [Source:RGD Symbol;Acc:1359096]
ENSRNOG00000011308	1480.26	0.206295	0.0647034	3.18832	0.00143104	0.00347902	ENSRNOG00000011308	Uhrf2	ubiquitin like with PHD and ring finger domains 2 [Source:RGD Symbol;Acc:1309990]
ENSRNOG00000030266	237.981	0.187202	0.122147	1.53259	0.125377	0.185718	ENSRNOG00000030266	Plekhg2	pleckstrin homology and RhoGEF domain containing G2 [Source:RGD Symbol;Acc:1310112]
ENSRNOG00000021140	202.401	0.317798	0.145492	2.18431	0.0289397	0.0516384	ENSRNOG00000021140	Kcnk4	potassium two pore domain channel subfamily K member 4 [Source:RGD Symbol;Acc:621449]
ENSRNOG00000016573	356.873	-0.218724	0.0996335	-2.19529	0.028143	0.0503715	ENSRNOG00000016573	Dgat2	diacylglycerol O-acyltransferase 2 [Source:RGD Symbol;Acc:620329]
ENSRNOG00000051578	215.77	0.767178	0.158559	4.83846	1.30852e-06	5.41493e-06	ENSRNOG00000051578	Zfp54	zinc finger protein 54 [Source:RGD Symbol;Acc:1307738]
ENSRNOG00000025167	518.617	-0.0675088	0.0778601	-0.867053	0.385913	0.475426	ENSRNOG00000025167	Sema4b	semaphorin 4B [Source:RGD Symbol;Acc:1307872]
ENSRNOG00000066618	226.626	0.616644	0.117034	5.26891	1.37236e-07	6.5295e-07	ENSRNOG00000066618	Sfxn2	sideroflexin 2 [Source:RGD Symbol;Acc:1306131]
ENSRNOG00000020495	1669.79	-0.391071	0.0564424	-6.92867	4.24815e-12	3.65663e-11	ENSRNOG00000020495	Eif3k	eukaryotic translation initiation factor 3, subunit K [Source:RGD Symbol;Acc:1309221]
ENSRNOG00000060206	1774.28	0.0911591	0.0560775	1.62559	0.104037	0.158207	ENSRNOG00000060206	Zfp592	zinc finger protein 592 [Source:RGD Symbol;Acc:1308705]
ENSRNOG00000020596	1187.55	-0.314098	0.068379	-4.59349	4.35893e-06	1.66964e-05	ENSRNOG00000020596	Dmac2	distal membrane arm assembly component 2 [Source:RGD Symbol;Acc:1549698]
ENSRNOG00000056036	314.474	0.872444	0.1693	5.15325	2.56014e-07	1.17015e-06	ENSRNOG00000056036	Zfp51	zinc finger protein 51 [Source:RGD Symbol;Acc:9163837]
ENSRNOG00000055531	466.341	0.34147	0.0961282	3.55223	0.000381978	0.00104242	ENSRNOG00000055531	Hps5	serum amyloid A4 [Source:RGD Symbol;Acc:1307371]
ENSRNOG00000045838	209.884	-0.0308012	0.106753	-0.288528	0.772943	0.825226	ENSRNOG00000045838	Hps1	HPS1, biogenesis of lysosomal organelles complex 3 subunit 1 [Source:RGD Symbol;Acc:69193]
ENSRNOG00000020904	705.628	-0.32898	0.0996449	-3.30153	0.000961604	0.00242547	ENSRNOG00000020904	Cdc42ep2	CDC42 effector protein 2 [Source:RGD Symbol;Acc:1310253]
ENSRNOG00000020271	3118.55	0.795825	0.0600143	13.2606	3.91837e-40	4.66382e-38	ENSRNOG00000020271	Tial1	Tia1 cytotoxic granule-associated RNA binding protein-like 1 [Source:RGD Symbol;Acc:1595845]
ENSRNOG00000032668	215.632	0.519061	0.11759	4.41416	1.01401e-05	3.65551e-05	ENSRNOG00000032668	LOC102550291	zinc finger protein 658-like [Source:RGD Symbol;Acc:7570552]
ENSRNOG00000068024	23.7451	0.605008	0.333232	1.81558	0.0694353	0.111129	ENSRNOG00000068024	B3gnt8	UDP-GlcNAc:betaGal beta-1,3-N-acetylglucosaminyltransferase 8 [Source:RGD Symbol;Acc:1305374]
ENSRNOG00000028113	286.613	0.03021	0.0875359	0.345116	0.730007	0.791136	ENSRNOG00000028113	Whamm	WASP homolog associated with actin, golgi membranes and microtubules [Source:RGD Symbol;Acc:1563506]
ENSRNOG00000047124	27.9135	0.734903	0.343672	2.13838	0.0324858	0.0571443	ENSRNOG00000047124	Atp2a1	ATPase sarcoplasmic/endoplasmic reticulum Ca2+ transporting 1 [Source:RGD Symbol;Acc:621293]
ENSRNOG00000012067	88.3597	-0.904946	1.27419	-0.710215	0.477571	0.567663	ENSRNOG00000012067	Fam111a	FAM111 trypsin like peptidase A [Source:RGD Symbol;Acc:1560913]
ENSRNOG00000026115	563.102	0.0923113	0.0751322	1.22865	0.219202	0.29812	ENSRNOG00000026115	Zfp646	zinc finger protein 646 [Source:RGD Symbol;Acc:1561579]
ENSRNOG00000042347	182.586	0.404918	0.123733	3.2725	0.001066	0.00266427	ENSRNOG00000042347	Zfp53	zinc finger protein 53 [Source:RGD Symbol;Acc:1308573]
ENSRNOG00000026857	76.3763	-0.0250147	0.196697	-0.127174	0.898803	0.924896	ENSRNOG00000026857	Kif7	kinesin family member 7 [Source:RGD Symbol;Acc:1310310]
ENSRNOG00000020607	356.962	-0.516623	0.0878015	-5.88399	4.0049e-09	2.38048e-08	ENSRNOG00000020607	Bckdha	branched chain keto acid dehydrogenase E1 subunit alpha [Source:RGD Symbol;Acc:2196]
ENSRNOG00000013057	37.8988	0.183728	0.243194	0.755479	0.449961	0.540348	ENSRNOG00000013057	Prc1	protein regulator of cytokinesis 1 [Source:RGD Symbol;Acc:1311754]
ENSRNOG00000019861	4417.17	-0.0331269	0.0471136	-0.703127	0.481976	0.571936	ENSRNOG00000019861	Tollip	toll interacting protein [Source:RGD Symbol;Acc:1304676]
ENSRNOG00000013194	426.559	-0.124649	0.0789134	-1.57957	0.114205	0.171319	ENSRNOG00000013194	Rps6ka2	ribosomal protein S6 kinase A2 [Source:RGD Symbol;Acc:620676]
ENSRNOG00000020906	137.073	-0.00168263	0.146538	-0.0114826	0.990838	0.993301	ENSRNOG00000020906	Pola2	DNA polymerase alpha 2, accessory subunit [Source:RGD Symbol;Acc:621817]
ENSRNOG00000012360	1199.42	-0.153897	0.0663808	-2.31839	0.0204282	0.0378027	ENSRNOG00000012360	Gtf2h1	general transcription factor IIH subunit 1 [Source:RGD Symbol;Acc:1308225]
ENSRNOG00000023496	662.143	-0.17221	0.0706758	-2.43662	0.0148253	0.0285772	ENSRNOG00000023496	Entrep2	endosomal transmembrane epsin interactor 2 [Source:RGD Symbol;Acc:1592985]
ENSRNOG00000019178	490.4	-0.412426	0.0803522	-5.13273	2.85576e-07	1.29548e-06	ENSRNOG00000019178	Taf10	TATA-box binding protein associated factor 10 [Source:RGD Symbol;Acc:1305907]
ENSRNOG00000014373	944.185	0.57596	0.108497	5.30855	1.105e-07	5.32551e-07	ENSRNOG00000014373	Trim66	tripartite motif-containing 66 [Source:RGD Symbol;Acc:1595847]
ENSRNOG00000014187	440.011	0.629613	0.109519	5.7489	8.98244e-09	5.07131e-08	ENSRNOG00000014187	Igf1r	insulin-like growth factor 1 receptor [Source:RGD Symbol;Acc:2869]
ENSRNOG00000016498	1337.68	0.111968	0.0621978	1.80019	0.0718309	0.114445	ENSRNOG00000016498	AABR07004112.1
ENSRNOG00000061795	1044.05	0.0955001	0.0570587	1.67372	0.0941864	0.144928	ENSRNOG00000061795	Rbm4b	RNA binding motif protein 4B [Source:RGD Symbol;Acc:1359343]
ENSRNOG00000019212	2368.71	0.209827	0.0504303	4.16073	3.17231e-05	0.000105129	ENSRNOG00000019212	Tpp1	tripeptidyl peptidase 1 [Source:RGD Symbol;Acc:621296]
ENSRNOG00000020635	215.514	-0.528251	0.106523	-4.95905	7.08381e-07	3.02987e-06	ENSRNOG00000020635	Exosc5	exosome component 5 [Source:RGD Symbol;Acc:1307861]
ENSRNOG00000017120	767.077	0.350434	0.0719816	4.86838	1.12516e-06	4.69632e-06	ENSRNOG00000017120	Abhd2	abhydrolase domain containing 2, acylglycerol lipase [Source:RGD Symbol;Acc:1311389]
ENSRNOG00000020369	776.996	-1.33525	0.174034	-7.67236	1.68866e-14	1.93536e-13	ENSRNOG00000020369	Igf2	insulin-like growth factor 2 [Source:RGD Symbol;Acc:2870]
ENSRNOG00000069701	24.7505	0.439684	0.334623	1.31397	0.188856	0.262002	ENSRNOG00000069701
ENSRNOG00000042059	142.822	0.138238	0.127031	1.08822	0.276498	0.361399	ENSRNOG00000042059	Rccd1	RCC1 domain containing 1 [Source:RGD Symbol;Acc:1309901]
ENSRNOG00000026040	629.791	0.324182	0.0925166	3.50404	0.000458255	0.00123342	ENSRNOG00000026040	Prss53	serine protease 53 [Source:RGD Symbol;Acc:1566127]
ENSRNOG00000012683	344.713	-0.060504	0.0806926	-0.749809	0.45337	0.543812	ENSRNOG00000012683	Abhd17c	abhydrolase domain containing 17C, depalmitoylase [Source:RGD Symbol;Acc:1308210]
ENSRNOG00000068180	86.8039	0.266613	0.181091	1.47226	0.140951	0.204839	ENSRNOG00000068180	Tmem91	transmembrane protein 91 [Source:RGD Symbol;Acc:2323264]
ENSRNOG00000022822	32.9957	-0.0579974	0.286948	-0.202118	0.839825	0.879813	ENSRNOG00000022822	Fam169b	family with sequence similarity 169, member B [Source:RGD Symbol;Acc:1585883]
ENSRNOG00000014565	899.991	-0.440364	0.0648631	-6.78912	1.12819e-11	9.27135e-11	ENSRNOG00000014565	Lcmt1	leucine carboxyl methyltransferase 1 [Source:RGD Symbol;Acc:735118]
ENSRNOG00000019193	15137.9	-0.198949	0.0530931	-3.74717	0.000178839	0.00051897	ENSRNOG00000019193	Stx1b	syntaxin 1B [Source:RGD Symbol;Acc:3784]
ENSRNOG00000024363	175.106	-0.510307	0.130548	-3.90897	9.26905e-05	0.000284197	ENSRNOG00000024363	Sertad1	SERTA domain containing 1 [Source:RGD Symbol;Acc:1549778]
ENSRNOG00000060707	2563.89	-0.00944215	0.0535751	-0.176242	0.860104	0.896338	ENSRNOG00000060707	Atg2a	autophagy related 2A [Source:RGD Symbol;Acc:1589890]
ENSRNOG00000012357	1448.07	-0.165261	0.0596947	-2.76844	0.00563249	0.0120794	ENSRNOG00000012357	Unc45a	unc-45 myosin chaperone A [Source:RGD Symbol;Acc:1305357]
ENSRNOG00000011659	35.1006	0.749015	0.266952	2.80581	0.00501909	0.0109154	ENSRNOG00000011659	Alpk3	alpha-kinase 3 [Source:RGD Symbol;Acc:1309860]
ENSRNOG00000018928	193.579	0.270474	0.125029	2.16329	0.0305191	0.0541175	ENSRNOG00000018928	LOC102553760	zinc finger protein 59-like [Source:RGD Symbol;Acc:7588314]
ENSRNOG00000011599	468.067	0.254882	0.0807851	3.15506	0.00160466	0.00386743	ENSRNOG00000011599	Gldc	glycine decarboxylase [Source:RGD Symbol;Acc:1308660]
ENSRNOG00000050282	5083.3	0.362853	0.053449	6.78877	1.13095e-11	9.28877e-11	ENSRNOG00000050282	Srcap	Snf2-related CREBBP activator protein [Source:RGD Symbol;Acc:1565642]
ENSRNOG00000024245	25.1235	0.683375	0.310065	2.20397	0.0275262	0.049395	ENSRNOG00000024245	Zkscan2	zinc finger with KRAB and SCAN domains 2 [Source:RGD Symbol;Acc:1359568]
ENSRNOG00000020835	201.302	-0.167916	0.127927	-1.31259	0.18932	0.262546	ENSRNOG00000020835	Hipk4	homeodomain interacting protein kinase 4 [Source:RGD Symbol;Acc:1307541]
ENSRNOG00000043007	280.283	-0.338937	0.104554	-3.24176	0.00118796	0.00293923	ENSRNOG00000043007	Rcn3	reticulocalbin 3 [Source:RGD Symbol;Acc:1359365]
ENSRNOG00000012442	864.478	-0.00138043	0.11125	-0.0124083	0.9901	0.993045	ENSRNOG00000012442	Cemip	cell migration inducing hyaluronidase 1 [Source:RGD Symbol;Acc:1305254]
ENSRNOG00000014513	48.9482	0.127733	0.206266	0.619264	0.535742	0.623059	ENSRNOG00000014513	Rexo5	RNA exonuclease 5 [Source:RGD Symbol;Acc:1305412]
ENSRNOG00000018158	2255.56	0.246314	0.0556222	4.42834	9.49605e-06	3.44214e-05	ENSRNOG00000018158	Tmem181	transmembrane protein 181 [Source:RGD Symbol;Acc:1566403]
ENSRNOG00000021106	1726.72	-0.10542	0.0729077	-1.44593	0.148196	0.21353	ENSRNOG00000021106	Gramd1a	GRAM domain containing 1A [Source:RGD Symbol;Acc:1311022]
ENSRNOG00000015540	2972.59	0.156911	0.0411916	3.8093	0.000139362	0.000412191	ENSRNOG00000015540	Ppp6r3	protein phosphatase 6, regulatory subunit 3 [Source:RGD Symbol;Acc:1307145]
ENSRNOG00000021108	125.362	-0.509429	0.182728	-2.78791	0.005305	0.0114566	ENSRNOG00000021108	Slc22a12	solute carrier family 22 member 12 [Source:RGD Symbol;Acc:621628]
ENSRNOG00000050104	22708.3	-0.245698	0.0455084	-5.39897	6.70239e-08	3.34107e-07	ENSRNOG00000050104	Clip3	CAP-GLY domain containing linker protein 3 [Source:RGD Symbol;Acc:1306245]
ENSRNOG00000018390	2066.78	-0.305299	0.06968	-4.38145	1.17895e-05	4.20729e-05	ENSRNOG00000018390	Pld3	phospholipase D family, member 3 [Source:RGD Symbol;Acc:1308248]
ENSRNOG00000021484	116.604	0.282459	0.154835	1.82426	0.0681125	0.109305	ENSRNOG00000021484	Rhoq-ps1	ras homolog family member Q, pseudogene 1 [Source:RGD Symbol;Acc:6491275]
ENSRNOG00000018683	1135.43	0.0508435	0.0674203	0.754128	0.450772	0.541143	ENSRNOG00000018683	Dock1	dedicator of cyto-kinesis 1 [Source:RGD Symbol;Acc:1566072]
ENSRNOG00000020583	481.889	-0.271009	0.0807043	-3.35805	0.000784931	0.00201591	ENSRNOG00000020583	Fcgrt	Fc gamma receptor and transporter [Source:RGD Symbol;Acc:61811]
ENSRNOG00000050828	551.26	0.634578	0.088795	7.14656	8.8981e-13	8.30394e-12	ENSRNOG00000050828	Vkorc1	vitamin K epoxide reductase complex, subunit 1 [Source:RGD Symbol;Acc:1303107]
ENSRNOG00000025216	227.617	-0.140301	0.11216	-1.2509	0.210971	0.288629	ENSRNOG00000025216	Alkbh6	alkB homolog 6 [Source:RGD Symbol;Acc:1566318]
ENSRNOG00000026408	297.062	0.404715	0.0897608	4.50881	6.5191e-06	2.42666e-05	ENSRNOG00000026408	Rnf169	ring finger protein 169 [Source:RGD Symbol;Acc:1583288]
ENSRNOG00000015518	85.6115	-1.58067	0.215961	-7.31925	2.49355e-13	2.46654e-12	ENSRNOG00000015518	Rbp4	retinol binding protein 4 [Source:RGD Symbol;Acc:3546]
ENSRNOG00000017762	27.449	0.652223	0.28557	2.28393	0.0223754	0.0410244	ENSRNOG00000017762	Cdhr5	cadherin-related family member 5 [Source:RGD Symbol;Acc:620504]
ENSRNOG00000023274	401.763	-0.155786	0.0875508	-1.77937	0.0751786	0.119061	ENSRNOG00000023274	Lrrc28	leucine rich repeat containing 28 [Source:RGD Symbol;Acc:1307209]
ENSRNOG00000019666	1622.91	-0.484911	0.0484282	-10.013	1.33653e-23	3.90499e-22	ENSRNOG00000019666	Ubxn1	UBX domain protein 1 [Source:RGD Symbol;Acc:1309471]
ENSRNOG00000049277	204.919	-0.174286	0.155496	-1.12084	0.262358	0.345927	ENSRNOG00000049277	Syne4	spectrin repeat containing nuclear envelope family member 4 [Source:RGD Symbol;Acc:1304580]
ENSRNOG00000020527	1685.67	-0.391587	0.0399036	-9.81333	9.86624e-23	2.63845e-21	ENSRNOG00000020527	Drap1	Dr1 associated protein 1 [Source:RGD Symbol;Acc:1308477]
ENSRNOG00000018207	274.662	-0.25719	0.106085	-2.42438	0.0153346	0.029427	ENSRNOG00000018207	Dynlt1	dynein light chain Tctex-type 1 [Source:RGD Symbol;Acc:620261]
ENSRNOG00000033881	776.321	0.0723449	0.116605	0.620428	0.534976	0.622417	ENSRNOG00000033881	Insyn2a	inhibitory synaptic factor 2A [Source:RGD Symbol;Acc:2302685]
ENSRNOG00000016358	3379.57	-0.238189	0.0525266	-4.53463	5.77044e-06	2.16462e-05	ENSRNOG00000016358	Apba2	amyloid beta precursor protein binding family A member 2 [Source:RGD Symbol;Acc:620845]
ENSRNOG00000026527	1031.4	0.131294	0.0783658	1.6754	0.093855	0.144479	ENSRNOG00000026527	Snx32	sorting nexin 32 [Source:RGD Symbol;Acc:1560591]
ENSRNOG00000019725	5863.67	-0.299986	0.0418593	-7.16652	7.69301e-13	7.22575e-12	ENSRNOG00000019725	Actr1a	actin related protein 1A [Source:RGD Symbol;Acc:1307025]
ENSRNOG00000019982	348.172	-0.424362	0.079846	-5.31476	1.06801e-07	5.15919e-07	ENSRNOG00000019982	Ethe1	ETHE1, persulfide dioxygenase [Source:RGD Symbol;Acc:1311034]
ENSRNOG00000045568	945.315	0.0202404	0.0885903	0.228472	0.819279	0.863647	ENSRNOG00000045568	Rbm14	RNA binding motif protein 14 [Source:RGD Symbol;Acc:620542]
ENSRNOG00000016728	530.761	0.0189186	0.0736125	0.257002	0.797177	0.845629	ENSRNOG00000016728	Tiam2	TIAM Rac1 associated GEF 2 [Source:RGD Symbol;Acc:2324148]
ENSRNOG00000036649	199.143	-0.13951	0.134092	-1.04041	0.298151	0.384327	ENSRNOG00000036649	Pwwp2b	PWWP domain containing 2B [Source:RGD Symbol;Acc:1307108]
ENSRNOG00000045561	307.551	-0.574292	0.094403	-6.0834	1.17659e-09	7.50668e-09	ENSRNOG00000045561	Uqcc3	ubiquinol-cytochrome c reductase complex assembly factor 3 [Source:RGD Symbol;Acc:1597344]
ENSRNOG00000020595	4269.45	-0.439107	0.0477491	-9.19612	3.71095e-20	7.65436e-19	ENSRNOG00000020595	Rps11	ribosomal protein S11 [Source:RGD Symbol;Acc:621026]
ENSRNOG00000018674	1665.68	0.63504	0.144902	4.38253	1.17307e-05	4.18839e-05	ENSRNOG00000018674	Ntrk3	neurotrophic receptor tyrosine kinase 3 [Source:RGD Symbol;Acc:3214]
ENSRNOG00000020389	73.2977	0.34582	0.215555	1.60433	0.108642	0.164042	ENSRNOG00000020389	Capn12	calpain 12 [Source:RGD Symbol;Acc:1307341]
ENSRNOG00000055506	21.8457	-0.423536	0.369145	-1.14734	0.25124	0.333876	ENSRNOG00000055506	LOC102551929	melanoma-associated antigen G1-like [Source:RGD Symbol;Acc:7571422]
ENSRNOG00000018322	4650.46	0.439837	0.0320964	13.7036	9.65642e-43	1.34828e-40	ENSRNOG00000018322	Picalm	phosphatidylinositol binding clathrin assembly protein [Source:RGD Symbol;Acc:621054]
ENSRNOG00000019920	23.9745	0.49494	0.346189	1.42968	0.152808	0.21898	ENSRNOG00000019920	Doc2a	double C2 domain alpha [Source:RGD Symbol;Acc:620518]
ENSRNOG00000020839	297.358	-0.646797	0.100149	-6.45836	1.05845e-10	7.77429e-10	ENSRNOG00000020839	Lrfn3	leucine rich repeat and fibronectin type III domain containing 3 [Source:RGD Symbol;Acc:1305567]
ENSRNOG00000064232	177.952	0.0758593	0.126302	0.600618	0.548094	0.634882	ENSRNOG00000064232	LOC103691238	zinc finger protein 239-like [Source:RGD Symbol;Acc:9074604]
ENSRNOG00000050180	503.056	-0.0221343	0.0901345	-0.245569	0.806016	0.852948	ENSRNOG00000050180	Zfpl1	zinc finger protein-like 1 [Source:RGD Symbol;Acc:1586738]
ENSRNOG00000019675	29.8796	0.0200921	0.291682	0.0688834	0.945082	0.95989	ENSRNOG00000019675	Pycard	PYD and CARD domain containing [Source:RGD Symbol;Acc:628637]
ENSRNOG00000020551	2022.19	-0.368389	0.0645112	-5.71046	1.12668e-08	6.29012e-08	ENSRNOG00000020551	Bles03	basophilic leukemia expressed protein BLES03 [Source:RGD Symbol;Acc:628612]
ENSRNOG00000047756	2624.39	0.686826	0.0640924	10.7162	8.54681e-27	3.37251e-25	ENSRNOG00000047756	Mef2a	myocyte enhancer factor 2a [Source:RGD Symbol;Acc:1359360]
ENSRNOG00000066875	373.261	0.305993	0.115811	2.64218	0.00823747	0.01695	ENSRNOG00000066875	Dcun1d3	defective in cullin neddylation 1 domain containing 3 [Source:RGD Symbol;Acc:1308893]
ENSRNOG00000014486	131.465	1.02354	0.162807	6.28681	3.24056e-10	2.22909e-09	ENSRNOG00000014486	Rfx3	regulatory factor X3 [Source:RGD Symbol;Acc:1307779]
ENSRNOG00000024793	280.524	-0.200067	0.114175	-1.75228	0.0797248	0.125304	ENSRNOG00000024793	Kctd21	potassium channel tetramerization domain containing 21 [Source:RGD Symbol;Acc:1559529]
ENSRNOG00000056223	357.735	0.0918142	0.0901204	1.01879	0.3083	0.395515	ENSRNOG00000056223	Tfb1m	transcription factor B1, mitochondrial [Source:RGD Symbol;Acc:727795]
ENSRNOG00000012292	172.287	0.0748459	0.117375	0.637665	0.523691	0.612002	ENSRNOG00000012292	Alg8	ALG8, alpha-1,3-glucosyltransferase [Source:RGD Symbol;Acc:1305468]
ENSRNOG00000020433	2798.79	-0.0549366	0.0498983	-1.10097	0.270909	0.355427	ENSRNOG00000020433	Actn4	actinin alpha 4 [Source:RGD Symbol;Acc:61816]
ENSRNOG00000020618	8718.73	-0.635739	0.0482159	-13.1853	1.06685e-39	1.21983e-37	ENSRNOG00000020618	Rpl13a	ribosomal protein L13A [Source:RGD Symbol;Acc:628697]
ENSRNOG00000012698	427.524	0.185777	0.0772286	2.40554	0.0161486	0.030822	ENSRNOG00000012698	Chsy1	chondroitin sulfate synthase 1 [Source:RGD Symbol;Acc:1311904]
ENSRNOG00000050741	27.5534	0.185417	0.297363	0.623537	0.532932	0.620486	ENSRNOG00000050741	Rbm4	RNA binding motif protein 4 [Source:RGD Symbol;Acc:1306891]
ENSRNOG00000010775	133.078	-0.0041325	0.148869	-0.0277594	0.977854	0.984567	ENSRNOG00000010775	Arrdc4	arrestin domain containing 4 [Source:RGD Symbol;Acc:1311763]
ENSRNOG00000019935	996.342	-0.166719	0.0988701	-1.68624	0.0917494	0.141688	ENSRNOG00000019935	Armc5	armadillo repeat containing 5 [Source:RGD Symbol;Acc:1306553]
ENSRNOG00000012383	1954.83	-0.237082	0.0594123	-3.99046	6.59462e-05	0.000207633	ENSRNOG00000012383	Ndufc2	NADH:ubiquinone oxidoreductase subunit C2 [Source:RGD Symbol;Acc:1307511]
ENSRNOG00000019960	829.726	-0.279722	0.0653963	-4.27734	1.89144e-05	6.51341e-05	ENSRNOG00000019960	Ino80e	INO80 complex subunit E [Source:RGD Symbol;Acc:1359572]
ENSRNOG00000012404	282.467	-0.485313	0.164762	-2.94554	0.00322395	0.00731141	ENSRNOG00000012404	Thrsp	thyroid hormone responsive [Source:RGD Symbol;Acc:3859]
ENSRNOG00000046333	10258.3	0.322446	0.0365966	8.81082	1.24233e-18	2.19999e-17	ENSRNOG00000046333	Ablim1	actin-binding LIM protein 1 [Source:RGD Symbol;Acc:1565768]
ENSRNOG00000019461	139.538	0.125235	0.117689	1.06412	0.287276	0.372558	ENSRNOG00000019461	Zbtb3	zinc finger and BTB domain containing 3 [Source:RGD Symbol;Acc:1561140]
ENSRNOG00000012494	188.578	-0.546067	0.125445	-4.35305	1.34259e-05	4.74466e-05	ENSRNOG00000012494	Kctd14	potassium channel tetramerization domain containing 14 [Source:RGD Symbol;Acc:1306430]
ENSRNOG00000050624	655.755	-0.219089	0.0740405	-2.95904	0.00308602	0.00701944	ENSRNOG00000050624	Lysmd4	LysM domain containing 4 [Source:RGD Symbol;Acc:1592887]
ENSRNOG00000016751	1000.84	-0.0283786	0.0663736	-0.427559	0.668972	0.740358	ENSRNOG00000016751	Slc25a28	solute carrier family 25 member 28 [Source:RGD Symbol;Acc:1584155]
ENSRNOG00000019077	571.274	-0.134025	0.0818034	-1.63837	0.101344	0.154597	ENSRNOG00000019077	Lipa	lipase A, lysosomal acid type [Source:RGD Symbol;Acc:3008]
ENSRNOG00000014862	19.1945	1.06717	0.372192	2.86726	0.00414042	0.0091665	ENSRNOG00000014862	Gabrg3	gamma-aminobutyric acid type A receptor subunit gamma 3 [Source:RGD Symbol;Acc:621735]
ENSRNOG00000013017	595.019	0.164863	0.0748803	2.20168	0.0276876	0.0496606	ENSRNOG00000013017	Arnt2	aryl hydrocarbon receptor nuclear translocator 2 [Source:RGD Symbol;Acc:2154]
ENSRNOG00000036604	106.408	0.284036	0.155568	1.8258	0.0678802	0.109036	ENSRNOG00000036604	Ifit2	interferon-induced protein with tetratricopeptide repeats 2 [Source:RGD Symbol;Acc:1307804]
ENSRNOG00000019439	977.243	-0.409588	0.0645465	-6.34563	2.21514e-10	1.56222e-09	ENSRNOG00000019439	Polr2g	RNA polymerase II subunit G [Source:RGD Symbol;Acc:621284]
ENSRNOG00000017195	1865.26	-0.0266901	0.0451473	-0.591179	0.5544	0.640704	ENSRNOG00000017195	Ctr9	CTR9 homolog, Paf1/RNA polymerase II complex component [Source:RGD Symbol;Acc:1311097]
ENSRNOG00000016603	1045.71	-0.413822	0.0661101	-6.25959	3.86002e-10	2.6229e-09	ENSRNOG00000016603	Rtn2	reticulon 2 [Source:RGD Symbol;Acc:1303245]
ENSRNOG00000065273	753.395	0.466884	0.063027	7.40768	1.28529e-13	1.31992e-12	ENSRNOG00000065273	LOC103691165	uncharacterized LOC103691165 [Source:RGD Symbol;Acc:9322177]
ENSRNOG00000018987	1737.52	1.15685	0.0656717	17.6156	1.86873e-69	1.59623e-66	ENSRNOG00000018987	Crebzf	CREB/ATF bZIP transcription factor [Source:RGD Symbol;Acc:1565584]
ENSRNOG00000027374	37.8323	-0.131548	0.23943	-0.54942	0.582718	0.665465	ENSRNOG00000027374	Cfap46	cilia and flagella associated protein 46 [Source:RGD Symbol;Acc:1559985]
ENSRNOG00000022748	74.9788	-0.149749	0.168765	-0.887326	0.374904	0.464226	ENSRNOG00000022748	Tmem126a	transmembrane protein 126A [Source:RGD Symbol;Acc:1305677]
ENSRNOG00000016689	135.038	0.526296	0.135013	3.89812	9.69404e-05	0.000295814	ENSRNOG00000016689	Fanci	FA complementation group I [Source:RGD Symbol;Acc:2321863]
ENSRNOG00000018929	47.8983	-0.253329	0.246634	-1.02715	0.304351	0.391139	ENSRNOG00000018929	Kif20b	kinesin family member 20B [Source:RGD Symbol;Acc:1308497]
ENSRNOG00000020623	542.23	-0.163511	0.0642455	-2.5451	0.0109246	0.0217848	ENSRNOG00000020623	Aldh16a1	aldehyde dehydrogenase 16 family, member A1 [Source:RGD Symbol;Acc:1566295]
ENSRNOG00000018487	3116.76	-0.272865	0.0557596	-4.89359	9.90113e-07	4.15533e-06	ENSRNOG00000018487	Slc3a2	solute carrier family 3 member 2 [Source:RGD Symbol;Acc:3073]
ENSRNOG00000019701	267.934	-0.40994	0.09721	-4.21705	2.47516e-05	8.34498e-05	ENSRNOG00000019701	C1h11orf98	similar to human chromosome 11 open reading frame 98 [Source:RGD Symbol;Acc:1597339]
ENSRNOG00000022386	2089.66	-0.166107	0.0770189	-2.15671	0.0310283	0.0549264	ENSRNOG00000022386	Opalin	oligodendrocytic myelin paranodal and inner loop protein [Source:RGD Symbol;Acc:1307776]
ENSRNOG00000033733	95.9663	0.333379	0.205982	1.61848	0.105558	0.160143	ENSRNOG00000033733	Ccdc81	coiled-coil domain containing 81 [Source:RGD Symbol;Acc:1306766]
ENSRNOG00000026005	705.653	-0.286382	0.0678263	-4.22229	2.41836e-05	8.18007e-05	ENSRNOG00000026005	Ints5	integrator complex subunit 5 [Source:RGD Symbol;Acc:1309370]
ENSRNOG00000060269	146.7	0.0662682	0.131064	0.505619	0.613124	0.692639	ENSRNOG00000060269	Vwce	von Willebrand factor C and EGF domains [Source:RGD Symbol;Acc:1309910]
ENSRNOG00000032293	890.919	0.0744795	0.0659352	1.12959	0.258651	0.341785	ENSRNOG00000032293	Polg	DNA polymerase gamma, catalytic subunit [Source:RGD Symbol;Acc:620057]
ENSRNOG00000020354	376.203	-0.484336	0.0968473	-5.00103	5.7025e-07	2.47256e-06	ENSRNOG00000020354	Mrpl23	mitochondrial ribosomal protein L23 [Source:RGD Symbol;Acc:68343]
ENSRNOG00000024530	264.814	-0.142665	0.0984412	-1.44924	0.14727	0.212322	ENSRNOG00000024530	Lyrm1	LYR motif containing 1 [Source:RGD Symbol;Acc:1563498]
ENSRNOG00000015003	257.413	0.131043	0.144046	0.909732	0.362964	0.451869	ENSRNOG00000015003	Pex11a	peroxisomal biogenesis factor 11 alpha [Source:RGD Symbol;Acc:619842]
ENSRNOG00000018725	1182.53	-0.0424989	0.053038	-0.801291	0.422963	0.513403	ENSRNOG00000018725	Phkg2	phosphorylase kinase catalytic subunit gamma 2 [Source:RGD Symbol;Acc:620024]
ENSRNOG00000055401	10774	-0.173533	0.0488864	-3.54972	0.000385648	0.00105164	ENSRNOG00000055401	Kcnc1	potassium voltage-gated channel subfamily C member 1 [Source:RGD Symbol;Acc:2955]
ENSRNOG00000054955	319.509	-0.0336665	0.105269	-0.319813	0.74911	0.806661	ENSRNOG00000054955	Adgra1	adhesion G protein-coupled receptor A1 [Source:RGD Symbol;Acc:1308241]
ENSRNOG00000017118	69.7488	-0.684407	0.21602	-3.16826	0.00153356	0.00370888	ENSRNOG00000017118	P4ha3	prolyl 4-hydroxylase subunit alpha 3 [Source:RGD Symbol;Acc:735150]
ENSRNOG00000070964	159.254	0.374194	0.129716	2.88473	0.0039175	0.00873155	ENSRNOG00000070964	Cc2d2b	coiled-coil and C2 domain containing 2B [Source:RGD Symbol;Acc:1310408]
ENSRNOG00000014783	162.605	-0.0411913	0.122278	-0.336867	0.736217	0.796737	ENSRNOG00000014783	Pgghg	protein-glucosylgalactosylhydroxylysine glucosidase [Source:RGD Symbol;Acc:1306015]
ENSRNOG00000020634	235.002	-0.172169	0.117693	-1.46287	0.143504	0.208022	ENSRNOG00000020634	Pih1d1	PIH1 domain containing 1 [Source:RGD Symbol;Acc:1309809]
ENSRNOG00000050426	43.5345	0.434864	0.253278	1.71694	0.0859899	0.133976	ENSRNOG00000050426	Dnah3	dynein, axonemal, heavy chain 3 [Source:RGD Symbol;Acc:1305855]
ENSRNOG00000019724	4364.09	-0.00973183	0.0374425	-0.259914	0.79493	0.844109	ENSRNOG00000019724	Ganab	glucosidase II alpha subunit [Source:RGD Symbol;Acc:1309775]
ENSRNOG00000016496	68.8065	-0.429633	0.178464	-2.40739	0.0160671	0.0306866	ENSRNOG00000016496	Ctsc	cathepsin C [Source:RGD Symbol;Acc:2445]
ENSRNOG00000048733	1007.26	-0.193378	0.0823672	-2.34776	0.0188868	0.0352921	ENSRNOG00000048733	Nup62	nucleoporin 62 [Source:RGD Symbol;Acc:619938]
ENSRNOG00000022839	50.532	0.905124	0.272827	3.31758	0.000908011	0.00230149	ENSRNOG00000022839	Ifit3	interferon-induced protein with tetratricopeptide repeats 3 [Source:RGD Symbol;Acc:1359681]
ENSRNOG00000025142	122.896	0.329889	0.15814	2.08606	0.0369736	0.064122	ENSRNOG00000025142	Mex3b	mex-3 RNA binding family member B [Source:RGD Symbol;Acc:1306790]
ENSRNOG00000067262	832.102	-0.254918	0.0645307	-3.95033	7.80433e-05	0.000242358	ENSRNOG00000067262	Aldh18a1	aldehyde dehydrogenase 18 family, member A1 [Source:RGD Symbol;Acc:1311431]
ENSRNOG00000025052	223.211	0.100832	0.121996	0.82652	0.408509	0.498317	ENSRNOG00000025052	Stard5	StAR-related lipid transfer domain containing 5 [Source:RGD Symbol;Acc:1561783]
ENSRNOG00000018815	24.5813	-0.362043	0.317053	-1.1419	0.253494	0.336286	ENSRNOG00000018815	Plk1	polo-like kinase 1 [Source:RGD Symbol;Acc:3352]
ENSRNOG00000020726	178.55	-0.103114	0.133809	-0.770608	0.440939	0.531095	ENSRNOG00000020726	Sipa1	signal-induced proliferation-associated 1 [Source:RGD Symbol;Acc:1303184]
ENSRNOG00000053015	125.036	0.755322	0.15056	5.01674	5.25552e-07	2.2952e-06	ENSRNOG00000053015	Cfap119	cilia and flagella associated protein 119 [Source:RGD Symbol;Acc:1593368]
ENSRNOG00000020650	16883.8	-0.382802	0.0528671	-7.24085	4.45896e-13	4.30223e-12	ENSRNOG00000020650	Slc17a7	solute carrier family 17 member 7 [Source:RGD Symbol;Acc:620101]
ENSRNOG00000019245	385.585	0.17037	0.0866692	1.96575	0.0493275	0.0825023	ENSRNOG00000019245	Sgf29	SAGA complex associated factor 29 [Source:RGD Symbol;Acc:1310609]
ENSRNOG00000011680	10164	-0.0655277	0.051848	-1.26384	0.206287	0.282833	ENSRNOG00000011680	Il16	interleukin 16 [Source:RGD Symbol;Acc:1583872]
ENSRNOG00000036603	27.6005	0.145639	0.278672	0.522618	0.60124	0.681866	ENSRNOG00000036603	Ifit1bl	interferon-induced protein with tetratricopeptide repeats 1B-like [Source:RGD Symbol;Acc:1304872]
ENSRNOG00000020430	1812.75	0.0745082	0.0615343	1.21084	0.225957	0.305505	ENSRNOG00000020430	Wdr11	WD repeat domain 11 [Source:RGD Symbol;Acc:1587347]
ENSRNOG00000017619	1678.57	0.0107923	0.0590488	0.182769	0.854979	0.89215	ENSRNOG00000017619	Aldh1a1	aldehyde dehydrogenase 1 family, member A1 [Source:RGD Symbol;Acc:2087]
ENSRNOG00000018163	2132.01	-0.180766	0.0828699	-2.18132	0.0291599	0.0519807	ENSRNOG00000018163	Ipcef1	interaction protein for cytohesin exchange factors 1 [Source:RGD Symbol;Acc:735159]
ENSRNOG00000017850	148.723	-0.477031	0.147079	-3.24337	0.00118125	0.00292463	ENSRNOG00000017850	Dctpp1	dCTP pyrophosphatase 1 [Source:RGD Symbol;Acc:620933]
ENSRNOG00000015078	145.319	-0.440168	0.136071	-3.23483	0.00121716	0.00300584	ENSRNOG00000015078	Ifitm3	interferon induced transmembrane protein 3 [Source:RGD Symbol;Acc:1595844]
ENSRNOG00000020505	22.1648	0.0270468	0.300331	0.0900567	0.928242	0.947291	ENSRNOG00000020505	Map4k1	mitogen activated protein kinase kinase kinase kinase 1 [Source:RGD Symbol;Acc:1305463]
ENSRNOG00000014936	101.363	-0.843097	0.153332	-5.49852	3.83002e-08	1.97499e-07	ENSRNOG00000014936	Ifitm2	interferon induced transmembrane protein 2 [Source:RGD Symbol;Acc:69332]
ENSRNOG00000018052	1980.92	-0.00699575	0.05474	-0.1278	0.898308	0.924539	ENSRNOG00000018052	Cnksr3	Cnksr family member 3 [Source:RGD Symbol;Acc:1307544]
ENSRNOG00000019050	46.3707	1.94843	0.88806	2.19403	0.0282331	0.0505266	ENSRNOG00000019050	Ifit1	interferon-induced protein with tetratricopeptide repeats 1 [Source:RGD Symbol;Acc:620599]
ENSRNOG00000020191	1537.02	-0.193889	0.0512232	-3.78517	0.000153605	0.000450956	ENSRNOG00000020191	Tbc1d17	TBC1 domain family, member 17 [Source:RGD Symbol;Acc:1309686]
ENSRNOG00000018042	1695.58	-0.453561	0.0490848	-9.24035	2.45684e-20	5.11847e-19	ENSRNOG00000018042	Mrpl48	mitochondrial ribosomal protein L48 [Source:RGD Symbol;Acc:1307576]
ENSRNOG00000020903	561.142	-0.121777	0.0733549	-1.66011	0.0968921	0.148603	ENSRNOG00000020903	Lto1	LTO1 maturation factor of ABCE1 [Source:RGD Symbol;Acc:1304637]
ENSRNOG00000018840	999.166	-0.026436	0.0717514	-0.368439	0.712546	0.776091	ENSRNOG00000018840	Rnf40	ring finger protein 40 [Source:RGD Symbol;Acc:628638]
ENSRNOG00000018391	348.647	-0.286817	0.0950933	-3.01616	0.00255999	0.00592126	ENSRNOG00000018391	Cdk2ap2	cyclin-dependent kinase 2 associated protein 2 [Source:RGD Symbol;Acc:1588883]
ENSRNOG00000020289	661.96	-0.243752	0.0705424	-3.45539	0.000549496	0.00145899	ENSRNOG00000020289	Akt1s1	AKT1 substrate 1 [Source:RGD Symbol;Acc:1312049]
ENSRNOG00000017227	3370.53	-0.257269	0.0429439	-5.99081	2.08794e-09	1.29237e-08	ENSRNOG00000017227	Ppme1	protein phosphatase methylesterase 1 [Source:RGD Symbol;Acc:1309683]
ENSRNOG00000020851	12380.9	-0.240951	0.0676468	-3.5619	0.000368181	0.00100837	ENSRNOG00000020851	Aplp1	amyloid beta precursor like protein 1 [Source:RGD Symbol;Acc:69257]
ENSRNOG00000011068	94.1738	0.0807716	0.161666	0.49962	0.617343	0.695967	ENSRNOG00000011068	Papss2	3'-phosphoadenosine 5'-phosphosulfate synthase 2 [Source:RGD Symbol;Acc:1307012]
ENSRNOG00000043141	1012.13	-0.45181	0.0674902	-6.69446	2.1647e-11	1.72807e-10	ENSRNOG00000043141	Ap3s2	adaptor related protein complex 3 subunit sigma 2 [Source:RGD Symbol;Acc:1586888]
ENSRNOG00000015088	4396.64	0.285742	0.0647573	4.4125	1.02182e-05	3.68184e-05	ENSRNOG00000015088	Prune2	prune homolog 2 with BCH domain [Source:RGD Symbol;Acc:1311350]
ENSRNOG00000064647	1185.94	-0.330095	0.0585766	-5.63526	1.74792e-08	9.52759e-08	ENSRNOG00000064647	Echs1	enoyl-CoA hydratase, short chain 1 [Source:RGD Symbol;Acc:69330]
ENSRNOG00000017114	509.313	0.26767	0.0794546	3.36884	0.000754859	0.0019466	ENSRNOG00000017114	Synj2	synaptojanin 2 [Source:RGD Symbol;Acc:69436]
ENSRNOG00000060008	718.503	-0.274603	0.0672139	-4.08551	4.39803e-05	0.000142649	ENSRNOG00000060008	Cog7	component of oligomeric golgi complex 7 [Source:RGD Symbol;Acc:1566058]
ENSRNOG00000018176	9632.7	0.339967	0.0380532	8.934	4.10877e-19	7.63936e-18	ENSRNOG00000018176	Rab6a	RAB6A, member RAS oncogene family [Source:RGD Symbol;Acc:619737]
ENSRNOG00000060693	23.4946	0.641543	0.348507	1.84083	0.0656461	0.105903	ENSRNOG00000060693	Catsperg	cation channel sperm associated auxiliary subunit gamma [Source:RGD Symbol;Acc:1310942]
ENSRNOG00000051256	330.851	-0.143848	0.0904023	-1.59119	0.111566	0.167936	ENSRNOG00000051256	R3hcc1l	R3H domain and coiled-coil containing 1-like [Source:RGD Symbol;Acc:1307934]
ENSRNOG00000029061	984.019	-0.0751661	0.0653676	-1.1499	0.250186	0.332688	ENSRNOG00000029061	Hirip3	HIRA interacting protein 3 [Source:RGD Symbol;Acc:1306463]
ENSRNOG00000018838	456.946	-0.198324	0.0917628	-2.16127	0.0306747	0.0543735	ENSRNOG00000018838	Paox	polyamine oxidase [Source:RGD Symbol;Acc:1561125]
ENSRNOG00000017222	880.609	0.0566353	0.0565639	1.00126	0.3167	0.404113	ENSRNOG00000017222	Abraxas2	abraxas 2, BRISC complex subunit [Source:RGD Symbol;Acc:1308918]
ENSRNOG00000020918	208.131	-0.19362	0.132663	-1.45949	0.144431	0.209098	ENSRNOG00000020918	Ccnd1	cyclin D1 [Source:RGD Symbol;Acc:68384]
ENSRNOG00000017889	747.391	0.114235	0.0565827	2.0189	0.0434981	0.0738409	ENSRNOG00000017889	Serac1	serine active site containing 1 [Source:RGD Symbol;Acc:1565064]
ENSRNOG00000014589	292.381	-0.0142771	0.0875352	-0.163101	0.870439	0.904268	ENSRNOG00000014589	Arpin	actin-related protein 2/3 complex inhibitor [Source:RGD Symbol;Acc:1311021]
ENSRNOG00000017608	973.384	0.168647	0.0695477	2.42492	0.015312	0.0293913	ENSRNOG00000017608	C2cd3	C2 domain containing 3 centriole elongation regulator [Source:RGD Symbol;Acc:1307366]
ENSRNOG00000023360	5478.27	-0.13574	0.0564607	-2.40415	0.01621	0.0309189	ENSRNOG00000023360	Fus	Fus RNA binding protein [Source:RGD Symbol;Acc:1308864]
ENSRNOG00000068667	57.5916	0.641678	0.227352	2.8224	0.00476664	0.0104304	ENSRNOG00000068667
ENSRNOG00000019873	2569.16	-0.385654	0.0444735	-8.67153	4.26346e-18	7.16547e-17	ENSRNOG00000019873	B3gat3	beta-1,3-glucuronyltransferase 3 [Source:RGD Symbol;Acc:1311968]
ENSRNOG00000030888	718.448	-0.178184	0.0678534	-2.62601	0.00863918	0.0177039	ENSRNOG00000030888	Rela	RELA proto-oncogene, NF-kB subunit [Source:RGD Symbol;Acc:727889]
ENSRNOG00000011683	39.2007	0.376229	0.294717	1.27658	0.201751	0.277274	ENSRNOG00000011683	Fes	FES proto-oncogene, tyrosine kinase [Source:RGD Symbol;Acc:1564385]
ENSRNOG00000018599	451.884	-0.016964	0.094896	-0.178764	0.858123	0.894594	ENSRNOG00000018599	Gga2	golgi associated, gamma adaptin ear containing, ARF binding protein 2 [Source:RGD Symbol;Acc:1304800]
ENSRNOG00000021689	1179.2	0.388715	0.0867102	4.48292	7.36298e-06	2.71503e-05	ENSRNOG00000021689	Rps6kb2	ribosomal protein S6 kinase B2 [Source:RGD Symbol;Acc:1305144]
ENSRNOG00000024036	682.163	-0.0643948	0.0930211	-0.69226	0.488774	0.578301	ENSRNOG00000024036	Fam98c	family with sequence similarity 98, member C [Source:RGD Symbol;Acc:1303117]
ENSRNOG00000024625	467.164	0.127398	0.0878931	1.44947	0.147206	0.212293	ENSRNOG00000024625	Proser3	proline and serine rich 3 [Source:RGD Symbol;Acc:1565712]
ENSRNOG00000011352	1173.6	-0.14827	0.0582434	-2.54569	0.0109062	0.0217569	ENSRNOG00000011352	Furin	furin (paired basic amino acid cleaving enzyme) [Source:RGD Symbol;Acc:3274]
ENSRNOG00000017725	40.6481	-0.642106	0.254969	-2.51837	0.0117899	0.0233595	ENSRNOG00000017725	Pnlip	pancreatic lipase [Source:RGD Symbol;Acc:3360]
ENSRNOG00000020742	1909.26	0.0790652	0.0658193	1.20125	0.229656	0.309612	ENSRNOG00000020742	Pcnx3	pecanex 3 [Source:RGD Symbol;Acc:1305529]
ENSRNOG00000018877	1330.6	-0.0650746	0.0600197	-1.08422	0.278267	0.362982	ENSRNOG00000018877	Zfp689	zinc finger protein 689 [Source:RGD Symbol;Acc:628696]
ENSRNOG00000020922	2057.43	-0.449643	0.0589189	-7.63156	2.31934e-14	2.62298e-13	ENSRNOG00000020922	Hspb6	heat shock protein family B (small) member 6 [Source:RGD Symbol;Acc:621554]
ENSRNOG00000011213	252.406	-0.172959	0.13287	-1.30171	0.193014	0.266872	ENSRNOG00000011213	Blm	BLM RecQ like helicase [Source:RGD Symbol;Acc:1308810]
ENSRNOG00000020929	493.468	-0.301228	0.0805993	-3.73735	0.000185971	0.000538374	ENSRNOG00000020929	Lin37	lin-37 DREAM MuvB core complex component [Source:RGD Symbol;Acc:1308901]
ENSRNOG00000018627	5687.16	-0.0773223	0.0848029	-0.911788	0.36188	0.450929	ENSRNOG00000018627	Plekhb1	pleckstrin homology domain containing B1 [Source:RGD Symbol;Acc:621614]
ENSRNOG00000019858	157.947	-0.157926	0.131935	-1.197	0.231306	0.311547	ENSRNOG00000019858	Rom1	retinal outer segment membrane protein 1 [Source:RGD Symbol;Acc:1306070]
ENSRNOG00000019813	754.21	-0.375742	0.0653744	-5.74754	9.05532e-09	5.10848e-08	ENSRNOG00000019813	Ppp4c	protein phosphatase 4, catalytic subunit [Source:RGD Symbol;Acc:621225]
ENSRNOG00000019913	1552.64	0.0131734	0.0478853	0.275104	0.783236	0.834131	ENSRNOG00000019913	Mta2	metastasis associated 1 family, member 2 [Source:RGD Symbol;Acc:1306743]
ENSRNOG00000067655	105.615	-0.384604	0.184164	-2.08838	0.0367634	0.063788	ENSRNOG00000067655	LOC103691235	uncharacterized LOC103691235 [Source:RGD Symbol;Acc:9213265]
ENSRNOG00000019005	315.825	0.145039	0.11454	1.26627	0.205415	0.281718	ENSRNOG00000019005	Pde8a	phosphodiesterase 8A [Source:RGD Symbol;Acc:735125]
ENSRNOG00000014234	1079.29	0.151457	0.05416	2.79647	0.0051664	0.0112006	ENSRNOG00000014234	Hif1an	hypoxia inducible factor 1 subunit alpha inhibitor [Source:RGD Symbol;Acc:1308281]
ENSRNOG00000052802	605.283	-0.416816	0.230454	-1.80867	0.0705016	0.112599	ENSRNOG00000052802	Aldoa	aldolase, fructose-bisphosphate A [Source:RGD Symbol;Acc:2089]
ENSRNOG00000012196	194.324	0.392433	0.161652	2.42764	0.0151975	0.0291948	ENSRNOG00000012196	Asah2	N-acylsphingosine amidohydrolase 2 [Source:RGD Symbol;Acc:69410]
ENSRNOG00000010630	351.691	0.0154694	0.088026	0.175737	0.860501	0.896536	ENSRNOG00000010630	Prcp	prolylcarboxypeptidase [Source:RGD Symbol;Acc:1307842]
ENSRNOG00000014078	3909.27	-0.490276	0.0616085	-7.95792	1.7495e-15	2.23435e-14	ENSRNOG00000014078	Ndufb8	NADH:ubiquinone oxidoreductase subunit B8 [Source:RGD Symbol;Acc:1309129]
ENSRNOG00000036866	485.683	0.321351	0.0767723	4.18577	2.84203e-05	9.49371e-05	ENSRNOG00000036866	Acer3	alkaline ceramidase 3 [Source:RGD Symbol;Acc:1561254]
ENSRNOG00000014183	1487.35	0.594197	0.0696292	8.53373	1.417e-17	2.25864e-16	ENSRNOG00000014183	Gnaq	G protein subunit alpha q [Source:RGD Symbol;Acc:620770]
ENSRNOG00000014482	2055.94	0.788087	0.0626684	12.5755	2.87988e-36	2.59744e-34	ENSRNOG00000014482	Slf2	SMC5-SMC6 complex localization factor 2 [Source:RGD Symbol;Acc:1560300]
ENSRNOG00000012061	6890.06	0.121188	0.0716885	1.69047	0.0909371	0.140643	ENSRNOG00000012061	Prkcb	protein kinase C, beta [Source:RGD Symbol;Acc:3396]
ENSRNOG00000020076	1687.75	-0.120622	0.0453526	-2.65965	0.00782214	0.0161503	ENSRNOG00000020076	Borcs7	BLOC-1 related complex subunit 7 [Source:RGD Symbol;Acc:1311783]
ENSRNOG00000020081	321.489	-0.179266	0.114737	-1.5624	0.118193	0.176572	ENSRNOG00000020081	As3mt	arsenite methyltransferase [Source:RGD Symbol;Acc:621325]
ENSRNOG00000014833	691.003	0.276503	0.063547	4.35115	1.35423e-05	4.78227e-05	ENSRNOG00000014833	Smndc1	survival motor neuron domain containing 1 [Source:RGD Symbol;Acc:1309151]
ENSRNOG00000050742	372.589	-0.166413	0.0825718	-2.01537	0.0438661	0.0743787	ENSRNOG00000050742	Dnmbp	dynamin binding protein [Source:RGD Symbol;Acc:1583840]
ENSRNOG00000016770	16222.4	-0.353427	0.0407809	-8.66648	4.45691e-18	7.4733e-17	ENSRNOG00000016770	Calm3	calmodulin 3 [Source:RGD Symbol;Acc:2259]
ENSRNOG00000019914	1810.58	-0.36208	0.0736124	-4.91873	8.71083e-07	3.68453e-06	ENSRNOG00000019914	Tlcd3b	TLC domain containing 3B [Source:RGD Symbol;Acc:1308215]
ENSRNOG00000028746	2009.32	-0.433399	0.0452374	-9.58054	9.65369e-22	2.35599e-20	ENSRNOG00000028746	Gsto1	glutathione S-transferase omega 1 [Source:RGD Symbol;Acc:70952]
ENSRNOG00000048028	19.8526	1.00676	0.340299	2.95844	0.00309198	0.00703079	ENSRNOG00000048028	AABR07002546.1
ENSRNOG00000069697	150.793	0.451614	0.153926	2.93397	0.00334662	0.00755774	ENSRNOG00000069697	Gsto2	glutathione S-transferase omega 2 [Source:RGD Symbol;Acc:1310764]
ENSRNOG00000069311	49.5043	0.59862	0.235263	2.54447	0.0109444	0.021817	ENSRNOG00000069311
ENSRNOG00000014276	128.471	0.399322	0.142002	2.81209	0.00492213	0.0107287	ENSRNOG00000014276	Plce1	phospholipase C, epsilon 1 [Source:RGD Symbol;Acc:69424]
ENSRNOG00000031328	1739.88	-0.0135833	0.0655364	-0.207264	0.835804	0.876423	ENSRNOG00000031328	Zfp110	zinc finger protein 110 [Source:RGD Symbol;Acc:1306339]
ENSRNOG00000016701	153.062	0.116465	0.132559	0.878587	0.379625	0.468993	ENSRNOG00000016701	Gng8	G protein subunit gamma 8 [Source:RGD Symbol;Acc:620808]
ENSRNOG00000027944	56.8795	-0.293912	0.215362	-1.36473	0.172337	0.242512	ENSRNOG00000027944	Pnma8a	PNMA family member 8A [Source:RGD Symbol;Acc:1310803]
ENSRNOG00000042679	478.798	1.12363	0.108077	10.3966	2.57008e-25	8.69935e-24	ENSRNOG00000042679	Lcor	ligand dependent nuclear receptor corepressor [Source:RGD Symbol;Acc:1311704]
ENSRNOG00000027919	297.484	0.124734	0.100713	1.23851	0.215528	0.293797	ENSRNOG00000027919	Rdh13	retinol dehydrogenase 13 [Source:RGD Symbol;Acc:1304959]
ENSRNOG00000068425	110.517	0.669486	0.173074	3.8682	0.00010964	0.000331613	ENSRNOG00000068425	Zfp551	zinc finger protein 551 [Source:RGD Symbol;Acc:1592780]
ENSRNOG00000026432	2600.31	-0.0215246	0.0711024	-0.302726	0.762098	0.816892	ENSRNOG00000026432	Syt7	synaptotagmin 7 [Source:RGD Symbol;Acc:62013]
ENSRNOG00000011262	1291.15	-0.408689	0.0690674	-5.91726	3.27355e-09	1.96996e-08	ENSRNOG00000011262	Bicra	BRD4 interacting chromatin remodeling complex associated protein [Source:RGD Symbol;Acc:1306385]
ENSRNOG00000043503	4673.13	-0.287709	0.0805137	-3.57342	0.000352352	0.000968668	ENSRNOG00000043503	Ehd1	EH-domain containing 1 [Source:RGD Symbol;Acc:1309017]
ENSRNOG00000062534	44.7981	0.399292	0.224201	1.78095	0.0749206	0.118704	ENSRNOG00000062534	LOC100364427	ribosomal protein S12-like [Source:RGD Symbol;Acc:2321033]
ENSRNOG00000019464	104.817	0.282218	0.151496	1.86288	0.0624797	0.101495	ENSRNOG00000019464	Ttc9c	tetratricopeptide repeat domain 9C [Source:RGD Symbol;Acc:1359253]
ENSRNOG00000001492	5103.65	-0.485929	0.0573682	-8.47035	2.44656e-17	3.82829e-16	ENSRNOG00000001492	Slc8a2	solute carrier family 8 member A2 [Source:RGD Symbol;Acc:620194]
ENSRNOG00000021916	36.7683	0.27799	0.25803	1.07736	0.281322	0.36621	ENSRNOG00000021916	Slc16a12	solute carrier family 16, member 12 [Source:RGD Symbol;Acc:1311468]
ENSRNOG00000015304	217.964	-0.621208	0.131943	-4.70815	2.49973e-06	9.92306e-06	ENSRNOG00000015304	Tmem160	transmembrane protein 160 [Source:RGD Symbol;Acc:1564549]
ENSRNOG00000062406	1822.02	0.636008	0.0449764	14.1409	2.12427e-45	3.40743e-43	ENSRNOG00000062406	Mosmo	modulator of smoothened [Source:RGD Symbol;Acc:7606925]
ENSRNOG00000015376	133.366	-0.145841	0.148646	-0.981128	0.32653	0.414289	ENSRNOG00000015376	Npas1	neuronal PAS domain protein 1 [Source:RGD Symbol;Acc:1310040]
ENSRNOG00000020773	427.24	-0.285689	0.0939893	-3.03959	0.00236897	0.00551317	ENSRNOG00000020773	Map3k11	mitogen-activated protein kinase kinase kinase 11 [Source:RGD Symbol;Acc:1359261]
ENSRNOG00000016907	3041.69	-0.268368	0.0447792	-5.99314	2.0583e-09	1.27511e-08	ENSRNOG00000016907	Ppp5c	protein phosphatase 5, catalytic subunit [Source:RGD Symbol;Acc:68415]
ENSRNOG00000053347	291.181	-0.144778	0.0965331	-1.49978	0.133672	0.195887	ENSRNOG00000053347	Ccdc28a	coiled-coil domain containing 28A [Source:RGD Symbol;Acc:1310326]
ENSRNOG00000021390	490.582	-0.124597	0.0841034	-1.48147	0.138482	0.201877	ENSRNOG00000021390	Meis3	Meis homeobox 3 [Source:RGD Symbol;Acc:1308532]
ENSRNOG00000020144	734.68	0.0143333	0.0866621	0.165393	0.868635	0.90296	ENSRNOG00000020144	Rusf1	RUS family member 1 [Source:RGD Symbol;Acc:1310127]
ENSRNOG00000014531	2251.02	-0.129343	0.0403586	-3.20485	0.00135131	0.00330732	ENSRNOG00000014531	Hbs1l	HBS1-like translational GTPase [Source:RGD Symbol;Acc:1308509]
ENSRNOG00000020165	25.7935	0.673893	0.336564	2.00227	0.0452558	0.0764939	ENSRNOG00000020165	Ahsp	alpha hemoglobin stabilizing protein [Source:RGD Symbol;Acc:1306725]
ENSRNOG00000028832	788.533	0.101125	0.0692227	1.46087	0.144051	0.208592	ENSRNOG00000028832	Sorcs3	sortilin-related VPS10 domain containing receptor 3 [Source:RGD Symbol;Acc:1310974]
ENSRNOG00000014353	1892.39	-0.196356	0.055147	-3.56059	0.000370021	0.00101257	ENSRNOG00000014353	Sympk	symplekin scaffold protein [Source:RGD Symbol;Acc:1306735]
ENSRNOG00000036760	47.059	0.246557	0.228372	1.07963	0.280307	0.36502	ENSRNOG00000036760	Tmc5	transmembrane channel-like 5 [Source:RGD Symbol;Acc:1307037]
ENSRNOG00000014768	28.9898	-0.149777	0.281772	-0.531552	0.595036	0.676429	ENSRNOG00000014768	Glis3	GLIS family zinc finger 3 [Source:RGD Symbol;Acc:1565505]
ENSRNOG00000027936	275.947	-0.355854	0.14173	-2.51078	0.0120464	0.0238175	ENSRNOG00000027936	Ccdc8	coiled-coil domain containing 8 [Source:RGD Symbol;Acc:1359717]
ENSRNOG00000058050	5797.03	0.437366	0.0439	9.96278	2.21776e-23	6.37704e-22	ENSRNOG00000058050	Bclaf1	mitochondrial fission regulator 2 [Source:RGD Symbol;Acc:6494892]
ENSRNOG00000019973	1578	-0.595688	0.0539295	-11.0457	2.30035e-28	1.05707e-26	ENSRNOG00000019973	Arl3	ADP ribosylation factor like GTPase 3 [Source:RGD Symbol;Acc:69327]
ENSRNOG00000060146	36.3552	-0.284481	0.241002	-1.18041	0.237837	0.318807	ENSRNOG00000060146	Six5	SIX homeobox 5 [Source:RGD Symbol;Acc:1305040]
ENSRNOG00000020075	7777.62	-0.529673	0.0471785	-11.227	3.00549e-29	1.51013e-27	ENSRNOG00000020075	Eef1g	eukaryotic translation elongation factor 1 gamma [Source:RGD Symbol;Acc:1302939]
ENSRNOG00000021062	199.53	0.0409185	0.138515	0.295408	0.767682	0.821119	ENSRNOG00000021062	Fxyd5	FXYD domain-containing ion transport regulator 5 [Source:RGD Symbol;Acc:620827]
ENSRNOG00000030616	26.381	0.0932793	0.313198	0.297828	0.765834	0.819868	ENSRNOG00000030616	Slc25a45	solute carrier family 25, member 45 [Source:RGD Symbol;Acc:1589953]
ENSRNOG00000001494	6675.68	-0.463709	0.0557297	-8.32068	8.74579e-17	1.29854e-15	ENSRNOG00000001494	Napa	NSF attachment protein alpha [Source:RGD Symbol;Acc:620855]
ENSRNOG00000037467	22.2655	0.0370521	0.365843	0.101279	0.919329	0.940575	ENSRNOG00000037467	Ffar3	free fatty acid receptor 3 [Source:RGD Symbol;Acc:1311035]
ENSRNOG00000014215	2951.93	0.21936	0.0683351	3.21007	0.00132703	0.00325174	ENSRNOG00000014215	Klf9	KLF transcription factor 9 [Source:RGD Symbol;Acc:70934]
ENSRNOG00000023296	111	0.0647955	0.136022	0.476361	0.633817	0.710134	ENSRNOG00000023296	Wtip	WT1 interacting protein [Source:RGD Symbol;Acc:1306411]
ENSRNOG00000019142	22.9601	0.0230893	0.320445	0.072054	0.942559	0.957728	ENSRNOG00000019142	Fas	Fas cell surface death receptor [Source:RGD Symbol;Acc:619831]
ENSRNOG00000020776	256.516	-0.286718	0.105282	-2.72332	0.0064629	0.0136605	ENSRNOG00000020776	Dhcr7	7-dehydrocholesterol reductase [Source:RGD Symbol;Acc:621769]
ENSRNOG00000053725	2018.2	-0.522102	0.0524472	-9.95482	2.40258e-23	6.88123e-22	ENSRNOG00000053725	Usf2	upstream transcription factor 2, c-fos interacting [Source:RGD Symbol;Acc:620975]
ENSRNOG00000020705	93.9182	-0.165226	0.166745	-0.990889	0.32174	0.409177	ENSRNOG00000020705	Rnls	renalase, FAD-dependent amine oxidase [Source:RGD Symbol;Acc:1309804]
ENSRNOG00000011245	122.008	-0.435495	0.15136	-2.87721	0.00401211	0.00891504	ENSRNOG00000011245	Arhgap18	Rho GTPase activating protein 18 [Source:RGD Symbol;Acc:1305053]
ENSRNOG00000021113	2664.07	-0.117533	0.0435738	-2.69732	0.00698997	0.0146361	ENSRNOG00000021113	Uba2	ubiquitin-like modifier activating enzyme 2 [Source:RGD Symbol;Acc:1312023]
ENSRNOG00000032677	1334.64	-0.473429	0.104706	-4.52151	6.1399e-06	2.29315e-05	ENSRNOG00000032677	Tssc4	tumor suppressing subtransferable candidate 4 [Source:RGD Symbol;Acc:1307043]
ENSRNOG00000015128	1918.06	-0.26177	0.0434056	-6.0308	1.6315e-09	1.02098e-08	ENSRNOG00000015128	Sae1	SUMO1 activating enzyme subunit 1 [Source:RGD Symbol;Acc:1306098]
ENSRNOG00000010861	2933.19	-0.00470292	0.0551257	-0.0853127	0.932013	0.949871	ENSRNOG00000010861	Atad1	ATPase family, AAA domain containing 1 [Source:RGD Symbol;Acc:1308570]
ENSRNOG00000020457	2281.1	-0.138244	0.0527265	-2.62191	0.00874377	0.0178929	ENSRNOG00000020457	Tacc2	transforming, acidic coiled-coil containing protein 2 [Source:RGD Symbol;Acc:1303004]
ENSRNOG00000015229	1326.25	-0.0845571	0.0677839	-1.24745	0.212232	0.290108	ENSRNOG00000015229	Zc3h4	zinc finger CCCH-type containing 4 [Source:RGD Symbol;Acc:1596943]
ENSRNOG00000021053	311.94	0.0250587	0.0847691	0.295611	0.767527	0.821058	ENSRNOG00000021053	Lsr	lipolysis stimulated lipoprotein receptor [Source:RGD Symbol;Acc:69236]
ENSRNOG00000020692	264.856	-0.0489087	0.0942469	-0.518943	0.603801	0.684129	ENSRNOG00000020692	Tmem216	transmembrane protein 216 [Source:RGD Symbol;Acc:1304607]
ENSRNOG00000015473	349.979	0.186156	0.107932	1.72475	0.0845734	0.132024	ENSRNOG00000015473	Phactr2	phosphatase and actin regulator 2 [Source:RGD Symbol;Acc:1303141]
ENSRNOG00000015948	66.0096	0.103852	0.195505	0.531198	0.595282	0.676588	ENSRNOG00000015948	Slc1a5	solute carrier family 1 member 5 [Source:RGD Symbol;Acc:708512]
ENSRNOG00000025350	150.43	0.307446	0.18625	1.65072	0.0987965	0.151208	ENSRNOG00000025350	Ppp1r13l	protein phosphatase 1, regulatory subunit 13 like [Source:RGD Symbol;Acc:1593681]
ENSRNOG00000016055	905.303	-0.214503	0.0606019	-3.53954	0.00040082	0.00108904	ENSRNOG00000016055	Fkrp	fukutin related protein [Source:RGD Symbol;Acc:1305852]
ENSRNOG00000012701	1926.36	0.526413	0.0667157	7.89039	3.01235e-15	3.76116e-14	ENSRNOG00000012701	Map7	microtubule-associated protein 7 [Source:RGD Symbol;Acc:1308866]
ENSRNOG00000016145	2384.33	-0.199921	0.0592924	-3.37178	0.000746842	0.00192901	ENSRNOG00000016145	Strn4	striatin 4 [Source:RGD Symbol;Acc:1307030]
ENSRNOG00000017955	168.841	-0.28562	0.120161	-2.37698	0.0174552	0.0329092	ENSRNOG00000017955	Nudt8	nudix hydrolase 8 [Source:RGD Symbol;Acc:1309040]
ENSRNOG00000020807	57.0669	0.36711	0.211014	1.73974	0.0819048	0.128383	ENSRNOG00000020807	Wdr62	WD repeat domain 62 [Source:RGD Symbol;Acc:1306714]
ENSRNOG00000046667	39.3309	0.241085	0.868094	0.277718	0.781229	0.83242	ENSRNOG00000046667	Fosb	FosB proto-oncogene, AP-1 transcription factor subunit [Source:RGD Symbol;Acc:1308198]
ENSRNOG00000013279	72.7321	0.270971	0.203207	1.33348	0.182375	0.254177	ENSRNOG00000013279	LOC681458	similar to stearoyl-coenzyme A desaturase 3 [Source:RGD Symbol;Acc:1595370]
ENSRNOG00000047605	103.327	0.112463	0.173199	0.649328	0.516126	0.604843	ENSRNOG00000047605	Ptprk	protein tyrosine phosphatase, receptor type, K [Source:RGD Symbol;Acc:619706]
ENSRNOG00000010117	4632.73	-0.0882511	0.0530985	-1.66203	0.0965072	0.148106	ENSRNOG00000010117	Eif3a	eukaryotic translation initiation factor 3, subunit A [Source:RGD Symbol;Acc:1307269]
ENSRNOG00000018282	21.1406	0.43317	0.369606	1.17198	0.241206	0.3224	ENSRNOG00000018282	Gda	guanine deaminase [Source:RGD Symbol;Acc:621617]
ENSRNOG00000013456	1088.26	-0.200777	0.0537905	-3.73258	0.000189529	0.000547693	ENSRNOG00000013456	Ighmbp2	immunoglobulin mu DNA binding protein 2 [Source:RGD Symbol;Acc:68325]
ENSRNOG00000025111	79.8177	-0.175856	0.173337	-1.01453	0.31033	0.397486	ENSRNOG00000025111	Nfkbid	NFKB inhibitor delta [Source:RGD Symbol;Acc:1308055]
ENSRNOG00000049028	39.9697	0.297105	0.244242	1.21644	0.223819	0.303037	ENSRNOG00000049028	C5ar2	complement C5a receptor 2 [Source:RGD Symbol;Acc:1303027]
ENSRNOG00000024931	341.051	0.0044498	0.1628	0.0273329	0.978194	0.984772	ENSRNOG00000024931	Ccdc88b	coiled-coil domain containing 88B [Source:RGD Symbol;Acc:1311475]
ENSRNOG00000011720	190.717	-0.0123867	0.104915	-0.118064	0.906017	0.930429	ENSRNOG00000011720	L3mbtl3	L3MBTL histone methyl-lysine binding protein 3 [Source:RGD Symbol;Acc:1305474]
ENSRNOG00000024278	839.56	-0.547379	0.073733	-7.4238	1.13808e-13	1.17623e-12	ENSRNOG00000024278	Rbm42	RNA binding motif protein 42 [Source:RGD Symbol;Acc:1306184]
ENSRNOG00000014132	506.102	-0.560935	0.0913343	-6.14155	8.17177e-10	5.31641e-09	ENSRNOG00000014132	Mypop	Myb-related transcription factor, partner of profilin [Source:RGD Symbol;Acc:1565160]
ENSRNOG00000019507	3718.11	-0.191895	0.0539752	-3.55525	0.000377619	0.00103091	ENSRNOG00000019507	Hnrnpul2	heterogeneous nuclear ribonucleoprotein U-like 2 [Source:RGD Symbol;Acc:1562784]
ENSRNOG00000070506	171.393	-0.429161	0.286934	-1.49568	0.134738	0.197191	ENSRNOG00000070506	Chst8	carbohydrate sulfotransferase 8 [Source:RGD Symbol;Acc:1308979]
ENSRNOG00000014254	848.965	0.00228784	0.0650825	0.0351529	0.971958	0.980261	ENSRNOG00000014254	Cpt1a	carnitine palmitoyltransferase 1A [Source:RGD Symbol;Acc:2396]
ENSRNOG00000021085	4042.52	0.16033	0.0522238	3.07006	0.00214015	0.00502076	ENSRNOG00000021085	Sf1	splicing factor 1 [Source:RGD Symbol;Acc:620645]
ENSRNOG00000020451	32.389	1.60849	0.326659	4.92407	8.47607e-07	3.59046e-06	ENSRNOG00000020451	Cd81	Cd81 molecule [Source:RGD Symbol;Acc:2315]
ENSRNOG00000049951	918.294	-0.584566	0.157442	-3.7129	0.000204896	0.000586959	ENSRNOG00000049951	Tmem151a	transmembrane protein 151A [Source:RGD Symbol;Acc:1310680]
ENSRNOG00000020702	162.617	-0.0310218	0.296179	-0.10474	0.916582	0.938756	ENSRNOG00000020702	Cyb561a3	cytochrome b561 family, member A3 [Source:RGD Symbol;Acc:1304670]
ENSRNOG00000013422	1238.34	0.390454	0.0696398	5.60676	2.0615e-08	1.11117e-07	ENSRNOG00000013422	Med23	mediator complex subunit 23 [Source:RGD Symbol;Acc:1307671]
ENSRNOG00000021052	1092.66	0.278771	0.0647188	4.30742	1.65168e-05	5.7488e-05	ENSRNOG00000021052	Patl1	PAT1 homolog 1, processing body mRNA decay factor [Source:RGD Symbol;Acc:1305514]
ENSRNOG00000019229	476.903	-0.516373	0.0808236	-6.38888	1.67102e-10	1.19886e-09	ENSRNOG00000019229	Fbl	fibrillarin [Source:RGD Symbol;Acc:1305542]
ENSRNOG00000020845	108.105	0.0820338	0.161806	0.506989	0.612163	0.691714	ENSRNOG00000020845	Tyrobp	transmembrane immune signaling adaptor Tyrobp [Source:RGD Symbol;Acc:1303081]
ENSRNOG00000020704	92.3934	-0.119349	0.191939	-0.621807	0.534069	0.621461	ENSRNOG00000020704	Tkfc	triokinase and FMN cyclase [Source:RGD Symbol;Acc:1311026]
ENSRNOG00000017225	476.147	0.423299	0.0763638	5.54319	2.97019e-08	1.55817e-07	ENSRNOG00000017225	Fhip2a	FHF complex subunit HOOK interacting protein 2A [Source:RGD Symbol;Acc:1306116]
ENSRNOG00000013202	2190.92	-0.0289788	0.060844	-0.47628	0.633875	0.710134	ENSRNOG00000013202	Akap7	A-kinase anchoring protein 7 [Source:RGD Symbol;Acc:1303071]
ENSRNOG00000067501	58.3368	-0.534697	0.198782	-2.68987	0.00714793	0.014916	ENSRNOG00000067501
ENSRNOG00000024331	45.2694	-0.257045	0.370569	-0.693648	0.487903	0.577412	ENSRNOG00000024331	Upk1a	uroplakin 1A [Source:RGD Symbol;Acc:1309849]
ENSRNOG00000021125	2957.82	-0.382982	0.046348	-8.26319	1.41827e-16	2.03909e-15	ENSRNOG00000021125	Prdx5	peroxiredoxin 5 [Source:RGD Symbol;Acc:71007]
ENSRNOG00000046000	1180.05	0.114434	0.0782351	1.46269	0.143553	0.208022	ENSRNOG00000046000	Clasrp	CLK4-associating serine/arginine rich protein [Source:RGD Symbol;Acc:1563538]
ENSRNOG00000015036	140.211	0.0712002	0.232224	0.306601	0.759147	0.814871	ENSRNOG00000015036	Ccn2	cellular communication network factor 2 [Source:RGD Symbol;Acc:621392]
ENSRNOG00000013239	1024.16	0.288614	0.0607163	4.75348	1.9994e-06	8.0581e-06	ENSRNOG00000013239	Tle4	TLE family member 4, transcriptional corepressor [Source:RGD Symbol;Acc:3868]
ENSRNOG00000009954	1040.1	0.442603	0.0730016	6.06292	1.33675e-09	8.46898e-09	ENSRNOG00000009954	Cacul1	CDK2-associated, cullin domain 1 [Source:RGD Symbol;Acc:1308127]
ENSRNOG00000033235	39.4821	-0.583092	0.298461	-1.95366	0.0507411	0.0845452	ENSRNOG00000033235	Relb	RELB proto-oncogene, NF-kB subunit [Source:RGD Symbol;Acc:2321078]
ENSRNOG00000025890	1428.2	-0.364284	0.0564319	-6.4553	1.08008e-10	7.92513e-10	ENSRNOG00000025890	Opa3	outer mitochondrial membrane lipid metabolism regulator OPA3 [Source:RGD Symbol;Acc:1309147]
ENSRNOG00000013845	473.393	-0.442003	0.0853371	-5.1795	2.22483e-07	1.02561e-06	ENSRNOG00000013845	Mrpl21	mitochondrial ribosomal protein L21 [Source:RGD Symbol;Acc:1310203]
ENSRNOG00000055286	921.837	-0.700118	0.077186	-9.07053	1.18443e-19	2.32734e-18	ENSRNOG00000055286	Yif1b	Yip1 interacting factor homolog B, membrane trafficking protein [Source:RGD Symbol;Acc:735199]
ENSRNOG00000020872	67.1368	-0.0973075	0.234306	-0.415301	0.677921	0.74718	ENSRNOG00000020872	Cd5	Cd5 molecule [Source:RGD Symbol;Acc:2309]
ENSRNOG00000016367	514.015	-0.112405	0.0829806	-1.3546	0.175545	0.246181	ENSRNOG00000016367	Vasp	vasodilator-stimulated phosphoprotein [Source:RGD Symbol;Acc:1311542]
ENSRNOG00000045543	184.915	-0.412358	0.142731	-2.88906	0.00386396	0.00862413	ENSRNOG00000045543	Frat2	FRAT regulator of WNT signaling pathway 2 [Source:RGD Symbol;Acc:1591882]
ENSRNOG00000011134	385.407	0.222464	0.0976879	2.27729	0.022769	0.0416881	ENSRNOG00000011134	Lama2	laminin subunit alpha 2 [Source:RGD Symbol;Acc:1308889]
ENSRNOG00000016265	588.214	-0.259365	0.0716266	-3.62107	0.000293391	0.000817252	ENSRNOG00000016265	Acsl5	acyl-CoA synthetase long-chain family member 5 [Source:RGD Symbol;Acc:69402]
ENSRNOG00000019964	4413.17	-0.2041	0.0383401	-5.32341	1.01839e-07	4.94088e-07	ENSRNOG00000019964	Taok2	TAO kinase 2 [Source:RGD Symbol;Acc:621590]
ENSRNOG00000021023	3605.4	-0.151582	0.135322	-1.12015	0.262649	0.34628	ENSRNOG00000021023	Mag	myelin-associated glycoprotein [Source:RGD Symbol;Acc:3035]
ENSRNOG00000012536	971.773	0.00869153	0.0676081	0.128558	0.897708	0.924048	ENSRNOG00000012536	Sgms1	sphingomyelin synthase 1 [Source:RGD Symbol;Acc:727912]
ENSRNOG00000013023	2919.08	-0.540803	0.0437677	-12.3562	4.51003e-35	3.67922e-33	ENSRNOG00000013023	Nop53	NOP53 ribosome biogenesis factor [Source:RGD Symbol;Acc:1303085]
ENSRNOG00000047783	170.8	0.353993	0.180548	1.96066	0.0499182	0.083375	ENSRNOG00000047783	Tmem200a	transmembrane protein 200A [Source:RGD Symbol;Acc:1564024]
ENSRNOG00000020636	477.159	-0.270711	0.0888619	-3.04642	0.00231586	0.00539959	ENSRNOG00000020636	Spint2	serine peptidase inhibitor, Kunitz type, 2 [Source:RGD Symbol;Acc:735123]
ENSRNOG00000020715	6796.07	-0.107289	0.0407291	-2.6342	0.00843359	0.0173168	ENSRNOG00000020715	Ddb1	damage-specific DNA binding protein 1 [Source:RGD Symbol;Acc:621889]
ENSRNOG00000019220	21.431	0.0501278	0.410535	0.122104	0.902817	0.927996	ENSRNOG00000019220	Rhod	ras homolog family member D [Source:RGD Symbol;Acc:1310985]
ENSRNOG00000064132	1016.36	-0.0857704	0.066804	-1.28391	0.199173	0.274349	ENSRNOG00000064132
ENSRNOG00000015852	6395.21	-0.0907919	0.0429955	-2.11166	0.0347154	0.0606695	ENSRNOG00000015852	Arhgap35	Rho GTPase activating protein 35 [Source:RGD Symbol;Acc:1308738]
ENSRNOG00000020676	161.413	-0.616826	0.185566	-3.32402	0.000887296	0.00225331	ENSRNOG00000020676	Ppp1r14a	protein phosphatase 1, regulatory (inhibitor) subunit 14A [Source:RGD Symbol;Acc:620536]
ENSRNOG00000020250	413.911	0.906165	0.0924429	9.80243	1.09905e-22	2.93369e-21	ENSRNOG00000020250	Pcgf6	polycomb group ring finger 6 [Source:RGD Symbol;Acc:1306904]
ENSRNOG00000031700	3293.16	0.0254883	0.0659602	0.386419	0.699187	0.765043	ENSRNOG00000031700	Map3k5	mitogen-activated protein kinase kinase kinase 5 [Source:RGD Symbol;Acc:1306565]
ENSRNOG00000018730	138.802	-0.480892	0.175331	-2.74276	0.00609251	0.0129758	ENSRNOG00000018730	Nectin2	nectin cell adhesion molecule 2 [Source:RGD Symbol;Acc:1309505]
ENSRNOG00000014997	1926.74	0.391591	0.055322	7.07839	1.45835e-12	1.32437e-11	ENSRNOG00000014997	Igf2r	insulin-like growth factor 2 receptor [Source:RGD Symbol;Acc:2871]
ENSRNOG00000020881	516.017	-0.291639	0.0769177	-3.79157	0.000149698	0.000440302	ENSRNOG00000020881	Frmd8	FERM domain containing 8 [Source:RGD Symbol;Acc:1310323]
ENSRNOG00000020201	333.914	-0.158746	0.0935507	-1.6969	0.0897162	0.139021	ENSRNOG00000020201	Yif1a	Yip1 interacting factor homolog A, membrane trafficking protein [Source:RGD Symbol;Acc:628749]
ENSRNOG00000020687	530.31	-0.115255	0.0882101	-1.30659	0.191352	0.26486	ENSRNOG00000020687	Dpf1	double PHD fingers 1 [Source:RGD Symbol;Acc:61868]
ENSRNOG00000020021	4500.24	-0.0399556	0.0517083	-0.772712	0.439693	0.529901	ENSRNOG00000020021	Brsk2	BR serine/threonine kinase 2 [Source:RGD Symbol;Acc:1566256]
ENSRNOG00000048848	1276.18	-0.0178813	0.0607693	-0.29425	0.768567	0.821884	ENSRNOG00000048848	Ccdc9	InaF-motif containing 1 [Source:RGD Symbol;Acc:2301983]
ENSRNOG00000017294	2234.16	0.113061	0.0630483	1.79325	0.0729336	0.11591	ENSRNOG00000017294	Zranb1	zinc finger RANBP2-type containing 1 [Source:RGD Symbol;Acc:2321751]
ENSRNOG00000020989	160.508	0.0227361	0.129978	0.174924	0.86114	0.896902	ENSRNOG00000020989	Tm7sf2	transmembrane 7 superfamily member 2 [Source:RGD Symbol;Acc:1311205]
ENSRNOG00000013994	379.181	0.209479	0.0953474	2.19701	0.0280197	0.0501757	ENSRNOG00000013994	Enpp1	ectonucleotide pyrophosphatase/phosphodiesterase 1 [Source:RGD Symbol;Acc:628825]
ENSRNOG00000021057	2163.99	-0.0478711	0.0447927	-1.06873	0.285193	0.370312	ENSRNOG00000021057	Osbp	oxysterol binding protein [Source:RGD Symbol;Acc:1308069]
ENSRNOG00000018107	4699.25	0.334	0.0526083	6.34881	2.16989e-10	1.53254e-09	ENSRNOG00000018107	Zfand5	zinc finger AN1-type containing 5 [Source:RGD Symbol;Acc:1310776]
ENSRNOG00000069776	25.0085	-0.0610782	0.311809	-0.195883	0.844701	0.883966	ENSRNOG00000069776	RGD1563307	similar to Set beta isoform [Source:RGD Symbol;Acc:1563307]
ENSRNOG00000015271	378.144	0.154992	0.0860096	1.80203	0.0715404	0.114058	ENSRNOG00000015271	Zfp418	zinc finger protein 418 [Source:RGD Symbol;Acc:1311663]
ENSRNOG00000011346	96.2922	0.133607	0.18244	0.732331	0.463966	0.554507	ENSRNOG00000011346	Ehd2	EH-domain containing 2 [Source:RGD Symbol;Acc:1560856]
ENSRNOG00000036576	874.734	0.185727	0.0581484	3.19401	0.00140309	0.00341793	ENSRNOG00000036576	Zdhhc6	zinc finger DHHC-type palmitoyltransferase 6 [Source:RGD Symbol;Acc:1304657]
ENSRNOG00000020000	231.549	-0.15399	0.113523	-1.35647	0.17495	0.245477	ENSRNOG00000020000	Tmem219	transmembrane protein 219 [Source:RGD Symbol;Acc:1560566]
ENSRNOG00000027161	302.555	-0.174449	0.0894268	-1.95075	0.051087	0.0850337	ENSRNOG00000027161	C1h9orf85	similar to human chromosome 9 open reading frame 85 [Source:RGD Symbol;Acc:1359158]
ENSRNOG00000066094	48.8032	0.0626726	0.215894	0.290293	0.771592	0.82439	ENSRNOG00000066094	LOC691135	similar to zinc finger protein 418 [Source:RGD Symbol;Acc:1587451]
ENSRNOG00000045795	545.137	-0.368008	0.0936509	-3.92958	8.50952e-05	0.000262294	ENSRNOG00000045795	Gatd1	glutamine amidotransferase class 1 domain containing 1 [Source:RGD Symbol;Acc:1304836]
ENSRNOG00000061526	21.6185	-0.232437	0.292152	-0.795603	0.426263	0.516631	ENSRNOG00000061526	Rsph6a	radial spoke head 6 homolog A [Source:RGD Symbol;Acc:1306786]
ENSRNOG00000021133	1914.43	-0.00462723	0.0597488	-0.0774447	0.93827	0.95464	ENSRNOG00000021133	Lsm14a	LSM14A mRNA processing body assembly factor [Source:RGD Symbol;Acc:1305695]
ENSRNOG00000055858	42.5505	0.552947	0.284424	1.94409	0.0518841	0.0862319	ENSRNOG00000055858	Myb	MYB proto-oncogene, transcription factor [Source:RGD Symbol;Acc:1560020]
ENSRNOG00000025476	62.466	-0.347205	0.258792	-1.34164	0.179714	0.25095	ENSRNOG00000025476	Tmem252	transmembrane protein 252 [Source:RGD Symbol;Acc:1359349]
ENSRNOG00000021174	380.693	-0.253582	0.102303	-2.47872	0.0131854	0.025745	ENSRNOG00000021174	Macrod1	mono-ADP ribosylhydrolase 1 [Source:RGD Symbol;Acc:628701]
ENSRNOG00000017002	25.4567	-0.0112037	0.294231	-0.0380779	0.969626	0.978904	ENSRNOG00000017002	Adrb1	adrenoceptor beta 1 [Source:RGD Symbol;Acc:2059]
ENSRNOG00000062946	66.7468	0.0461287	0.197396	0.233686	0.815229	0.860253	ENSRNOG00000062946
ENSRNOG00000021139	92.565	-0.297383	0.161197	-1.84485	0.0650599	0.105099	ENSRNOG00000021139	Esrra	estrogen related receptor, alpha [Source:RGD Symbol;Acc:1583866]
ENSRNOG00000027156	1012.63	-0.436342	0.0707109	-6.17078	6.79543e-10	4.47309e-09	ENSRNOG00000027156	Morn4	MORN repeat containing 4 [Source:RGD Symbol;Acc:1307336]
ENSRNOG00000014984	1165.87	-0.126336	0.0739658	-1.70804	0.0876291	0.13615	ENSRNOG00000014984	Dmwd	DM1 locus, WD repeat containing [Source:RGD Symbol;Acc:1594179]
ENSRNOG00000013304	59.0329	-0.263518	0.277098	-0.950991	0.341609	0.430239	ENSRNOG00000013304	Arg1	arginase 1 [Source:RGD Symbol;Acc:2150]
ENSRNOG00000020703	2691.45	-0.134874	0.0643712	-2.09525	0.0361488	0.0628568	ENSRNOG00000020703	Sipa1l3	signal-induced proliferation-associated 1 like 3 [Source:RGD Symbol;Acc:1311432]
ENSRNOG00000012514	879.293	0.322489	0.0621603	5.18803	2.12535e-07	9.84756e-07	ENSRNOG00000012514	Abhd17b	abhydrolase domain containing 17B, depalmitoylase [Source:RGD Symbol;Acc:1305246]
ENSRNOG00000014675	2163.32	-0.112546	0.0518365	-2.17118	0.0299175	0.0531871	ENSRNOG00000014675	Pi4k2a	phosphatidylinositol 4-kinase type 2 alpha [Source:RGD Symbol;Acc:620485]
ENSRNOG00000015598	71.2258	0.025654	0.172448	0.148764	0.88174	0.912468	ENSRNOG00000015598	Zfp772	zinc finger protein 772 [Source:RGD Symbol;Acc:1308782]
ENSRNOG00000042786	928.982	-0.0669866	0.0773811	-0.865672	0.38667	0.476116	ENSRNOG00000042786	Vti1a	vesicle transport through interaction with t-SNAREs 1A [Source:RGD Symbol;Acc:621490]
ENSRNOG00000059386	299.844	-0.642989	0.110643	-5.8114	6.19541e-09	3.5971e-08	ENSRNOG00000059386	Nudt19	nudix hydrolase 19 [Source:RGD Symbol;Acc:1302935]
ENSRNOG00000017326	2321.02	0.225438	0.0687508	3.27906	0.00104153	0.0026104	ENSRNOG00000017326	Ctbp2	C-terminal binding protein 2 [Source:RGD Symbol;Acc:68372]
ENSRNOG00000016411	2974.33	-0.595028	0.0480085	-12.3942	2.80896e-35	2.31755e-33	ENSRNOG00000016411	Rps12	ribosomal protein S12 [Source:RGD Symbol;Acc:62024]
ENSRNOG00000021090	2803.29	-0.171857	0.0699921	-2.45537	0.0140738	0.0272924	ENSRNOG00000021090	Pygm	glycogen phosphorylase, muscle associated [Source:RGD Symbol;Acc:3461]
ENSRNOG00000014173	2395.07	-0.0905439	0.051543	-1.75667	0.0789745	0.124283	ENSRNOG00000014173	Smc3	structural maintenance of chromosomes 3 [Source:RGD Symbol;Acc:62006]
ENSRNOG00000020941	1024.59	-0.591752	0.0755276	-7.83491	4.69162e-15	5.72977e-14	ENSRNOG00000020941	Psenen	presenilin enhancer gamma secretase subunit [Source:RGD Symbol;Acc:1312037]
ENSRNOG00000029399	266.374	-0.572285	0.136683	-4.18696	2.82717e-05	9.44624e-05	ENSRNOG00000029399	Bcam	basal cell adhesion molecule (Lutheran blood group) [Source:RGD Symbol;Acc:68378]
ENSRNOG00000018553	6961.66	-0.278231	0.0588869	-4.72484	2.303e-06	9.20757e-06	ENSRNOG00000018553	Pitpnm1	phosphatidylinositol transfer protein, membrane-associated 1 [Source:RGD Symbol;Acc:1306710]
ENSRNOG00000020247	581.033	-0.614489	0.0654584	-9.38746	6.14624e-21	1.37519e-19	ENSRNOG00000020247	Cnih2	cornichon family AMPA receptor auxiliary protein 2 [Source:RGD Symbol;Acc:1304930]
ENSRNOG00000016448	908.836	0.033826	0.0563851	0.59991	0.548566	0.635253	ENSRNOG00000016448	Eef2k	eukaryotic elongation factor-2 kinase [Source:RGD Symbol;Acc:2538]
ENSRNOG00000015406	561.643	-0.332385	0.10843	-3.06544	0.00217351	0.00509387	ENSRNOG00000015406	Pgm5	phosphoglucomutase 5 [Source:RGD Symbol;Acc:1307969]
ENSRNOG00000027459	370.788	-0.380282	0.111567	-3.40856	0.000653061	0.00170897	ENSRNOG00000027459	Zbtb45	zinc finger and BTB domain containing 45 [Source:RGD Symbol;Acc:1310920]
ENSRNOG00000067875	24.4623	2.1201	0.520469	4.07343	4.63251e-05	0.000149719	ENSRNOG00000067875	LOC120100274	small nucleolar RNA SNORD115 [Source:RGD Symbol;Acc:40943119]
ENSRNOG00000015670	2632.4	0.178126	0.0488917	3.64328	0.000269186	0.000754603	ENSRNOG00000015670	Stx7	syntaxin 7 [Source:RGD Symbol;Acc:619747]
ENSRNOG00000022289	1286.63	-0.391833	0.0622568	-6.29383	3.09731e-10	2.14376e-09	ENSRNOG00000022289	Aip	aryl-hydrocarbon receptor-interacting protein [Source:RGD Symbol;Acc:628619]
ENSRNOG00000020935	858.216	0.593154	0.0782052	7.58458	3.33553e-14	3.68329e-13	ENSRNOG00000020935	Capn1	calpain 1 [Source:RGD Symbol;Acc:2267]
ENSRNOG00000019202	74.9693	0.158905	0.170241	0.933412	0.350607	0.439348	ENSRNOG00000019202	Pvr	PVR cell adhesion molecule [Source:RGD Symbol;Acc:3813]
ENSRNOG00000025245	357.747	-0.279369	0.0996269	-2.80415	0.00504499	0.0109668	ENSRNOG00000025245	RGD1311946	similar to RIKEN cDNA 1810055G02 [Source:RGD Symbol;Acc:1311946]
ENSRNOG00000018018	410.712	-0.239381	0.121471	-1.97068	0.0487602	0.0816851	ENSRNOG00000018018	Kcnip2	potassium voltage-gated channel interacting protein 2 [Source:RGD Symbol;Acc:70887]
ENSRNOG00000020996	1089.87	-0.300983	0.0682432	-4.41044	1.03161e-05	3.7125e-05	ENSRNOG00000020996	Vps51	VPS51 subunit of GARP complex [Source:RGD Symbol;Acc:2319165]
ENSRNOG00000027487	4274.7	-0.172477	0.0468671	-3.68014	0.00023311	0.000660744	ENSRNOG00000027487	Trim28	tripartite motif-containing 28 [Source:RGD Symbol;Acc:620289]
ENSRNOG00000070897	2689.15	-0.358668	0.0448992	-7.98829	1.36825e-15	1.76922e-14	ENSRNOG00000070897	Rab1b	RAB1B, member RAS oncogene family [Source:RGD Symbol;Acc:1642882]
ENSRNOG00000020957	112.557	0.307152	0.1498	2.05042	0.0403235	0.0690411	ENSRNOG00000020957	Igflr1	IGF-like family receptor 1 [Source:RGD Symbol;Acc:1563574]
ENSRNOG00000052664	3592.78	0.355807	0.0475799	7.47809	7.54104e-14	7.99879e-13	ENSRNOG00000052664	Tnks2	tankyrase 2 [Source:RGD Symbol;Acc:1305026]
ENSRNOG00000012782	509.131	0.0531273	0.0863268	0.61542	0.538277	0.625506	ENSRNOG00000012782	Cemip2	cell migration inducing hyaluronidase 2 [Source:RGD Symbol;Acc:1307941]
ENSRNOG00000022153	653.337	-0.0307959	0.0785072	-0.392268	0.69486	0.761087	ENSRNOG00000022153	Tmem134	transmembrane protein 134 [Source:RGD Symbol;Acc:1305824]
ENSRNOG00000043328	1918.72	-0.125148	0.0468634	-2.67049	0.00757397	0.0156937	ENSRNOG00000043328	Chmp2a	charged multivesicular body protein 2A [Source:RGD Symbol;Acc:1305050]
ENSRNOG00000019771	25.9928	0.983827	0.307609	3.1983	0.0013824	0.00337431	ENSRNOG00000019771	Tbx6	T-box transcription factor 6 [Source:RGD Symbol;Acc:1307716]
ENSRNOG00000012346	907.585	0.114498	0.0798971	1.43307	0.151838	0.217849	ENSRNOG00000012346	Epb41l2	erythrocyte membrane protein band 4.1-like 2 [Source:RGD Symbol;Acc:1563977]
ENSRNOG00000020299	10480	-0.244222	0.0625383	-3.90515	9.41674e-05	0.000288421	ENSRNOG00000020299	Klc2	kinesin light chain 2 [Source:RGD Symbol;Acc:1307377]
ENSRNOG00000027514	3423.86	-0.133824	0.0414703	-3.22699	0.00125098	0.00308203	ENSRNOG00000027514	Ube2m	ubiquitin-conjugating enzyme E2M [Source:RGD Symbol;Acc:1307614]
ENSRNOG00000018847	1070.86	-0.188636	0.0641239	-2.94174	0.00326376	0.00739016	ENSRNOG00000018847	Stx5	syntaxin 5 [Source:RGD Symbol;Acc:68426]
ENSRNOG00000021179	402.114	0.427581	0.0965063	4.43061	9.39687e-06	3.41005e-05	ENSRNOG00000021179	Naa40	N(alpha)-acetyltransferase 40, NatD catalytic subunit [Source:RGD Symbol;Acc:1565838]
ENSRNOG00000055525	2342.2	0.173501	0.0622647	2.78651	0.00532792	0.0115009	ENSRNOG00000055525	Kmt2b	lysine methyltransferase 2B [Source:RGD Symbol;Acc:7678027]
ENSRNOG00000016058	37.6599	-0.585549	0.254989	-2.29637	0.0216549	0.039814	ENSRNOG00000016058	Kazald1	Kazal-type serine peptidase inhibitor domain 1 [Source:RGD Symbol;Acc:1310698]
ENSRNOG00000027550	149.103	0.243482	0.141539	1.72024	0.0853879	0.133153	ENSRNOG00000027550	Mzf1	myeloid zinc finger 1 [Source:RGD Symbol;Acc:1308391]
ENSRNOG00000020620	39.0304	-0.208352	0.273465	-0.761897	0.446121	0.536402	ENSRNOG00000020620	Ppp1r32	protein phosphatase 1, regulatory subunit 32 [Source:RGD Symbol;Acc:708532]
ENSRNOG00000018086	349.175	-0.644508	0.0958952	-6.72096	1.80529e-11	1.45395e-10	ENSRNOG00000018086	Slc22a8	solute carrier family 22 member 8 [Source:RGD Symbol;Acc:632286]
ENSRNOG00000013387	780.16	0.681444	0.121655	5.60146	2.12559e-08	1.14106e-07	ENSRNOG00000013387	Tpcn2	two pore segment channel 2 [Source:RGD Symbol;Acc:1311779]
ENSRNOG00000015232	3364.11	0.0734357	0.0678612	1.08215	0.279188	0.363987	ENSRNOG00000015232	Pip5k1b	phosphatidylinositol-4-phosphate 5-kinase type 1 beta [Source:RGD Symbol;Acc:1310914]
ENSRNOG00000024309	3427.1	-0.61835	0.0432027	-14.3128	1.82124e-46	3.14836e-44	ENSRNOG00000024309	Cox6b1	cytochrome c oxidase subunit 6B1 [Source:RGD Symbol;Acc:1584097]
ENSRNOG00000019069	2738.03	0.312653	0.0576741	5.42102	5.92593e-08	2.97958e-07	ENSRNOG00000019069	Nxf1	nuclear RNA export factor 1 [Source:RGD Symbol;Acc:62014]
ENSRNOG00000048337	741.581	-0.0247041	0.0768568	-0.321431	0.747884	0.805759	ENSRNOG00000048337	Hnrnpr-ps2	heterogeneous nuclear ribonucleoprotein R, pseudogene 2 [Source:RGD Symbol;Acc:7597569]
ENSRNOG00000017448	24.3862	-0.568876	0.288809	-1.96973	0.0488691	0.0818392	ENSRNOG00000017448	Exoc3l2	exocyst complex component 3-like 2 [Source:RGD Symbol;Acc:1592539]
ENSRNOG00000022428	1293.42	0.327667	0.0651694	5.02792	4.95824e-07	2.17207e-06	ENSRNOG00000022428	Flrt1	fibronectin leucine rich transmembrane protein 1 [Source:RGD Symbol;Acc:1565152]
ENSRNOG00000020350	1402.69	0.00627337	0.061815	0.101486	0.919165	0.940473	ENSRNOG00000020350	Pacs1	phosphofurin acidic cluster sorting protein 1 [Source:RGD Symbol;Acc:620579]
ENSRNOG00000011815	1548.57	-0.112532	0.226127	-0.497651	0.61873	0.697182	ENSRNOG00000011815	Sgk1	serum/glucocorticoid regulated kinase 1 [Source:RGD Symbol;Acc:3668]
ENSRNOG00000017463	95.1281	-0.7235	0.154507	-4.68265	2.83192e-06	1.11563e-05	ENSRNOG00000017463	Bloc1s3	biogenesis of lysosomal organelles complex-1, subunit 3 [Source:RGD Symbol;Acc:1591724]
ENSRNOG00000021573	1772.09	0.0274693	0.0672989	0.408169	0.68315	0.751447	ENSRNOG00000021573	Dpy19l3	dpy-19 like C-mannosyltransferase 3 [Source:RGD Symbol;Acc:1308334]
ENSRNOG00000017468	108.484	-0.471355	0.180172	-2.61614	0.00889308	0.0181703	ENSRNOG00000017468	Trappc6a	trafficking protein particle complex subunit 6A [Source:RGD Symbol;Acc:1591735]
ENSRNOG00000019266	331.5	-0.5993	0.0987565	-6.06846	1.29145e-09	8.19988e-09	ENSRNOG00000019266	Tmem223	transmembrane protein 223 [Source:RGD Symbol;Acc:1582829]
ENSRNOG00000013565	704.299	0.421599	0.0677181	6.22578	4.79153e-10	3.21619e-09	ENSRNOG00000013565	Zfp507	zinc finger protein 507 [Source:RGD Symbol;Acc:1307017]
ENSRNOG00000019341	117.685	-0.122523	0.145441	-0.842423	0.399551	0.489527	ENSRNOG00000019341	Tmem179b	transmembrane protein 179B [Source:RGD Symbol;Acc:1582850]
ENSRNOG00000019965	101.31	-0.248879	0.1812	-1.3735	0.169598	0.239285	ENSRNOG00000019965	Tgfb1i1	transforming growth factor beta 1 induced transcript 1 [Source:RGD Symbol;Acc:620173]
ENSRNOG00000017692	2389.11	-0.331994	0.0857693	-3.87077	0.000108491	0.000328552	ENSRNOG00000017692	Ppp1r37	protein phosphatase 1, regulatory subunit 37 [Source:RGD Symbol;Acc:1595870]
ENSRNOG00000017980	34.8835	0.489532	0.249079	1.96537	0.0493717	0.0825667	ENSRNOG00000017980	Itgal	integrin subunit alpha L [Source:RGD Symbol;Acc:631424]
ENSRNOG00000016371	670.842	0.147486	0.0778474	1.89456	0.0581513	0.0952742	ENSRNOG00000016371	Slc18b1	solute carrier family 18 member B1 [Source:RGD Symbol;Acc:1306962]
ENSRNOG00000036615	18.5562	0.896727	0.432273	2.07445	0.0380376	0.0656927	ENSRNOG00000036615	Cfap95	cilia and flagella associated protein 95 [Source:RGD Symbol;Acc:1560242]
ENSRNOG00000019419	342.352	-0.0619615	0.0895942	-0.691579	0.489202	0.578618	ENSRNOG00000019419	Taf6l	TATA-box binding protein associated factor 6 like [Source:RGD Symbol;Acc:1310123]
ENSRNOG00000020552	277.099	-0.453352	0.104435	-4.34101	1.41828e-05	4.99874e-05	ENSRNOG00000020552	Fosl1	FOS like 1, AP-1 transcription factor subunit [Source:RGD Symbol;Acc:2627]
ENSRNOG00000018215	42.6798	-1.55912	0.302291	-5.15766	2.50051e-07	1.14362e-06	ENSRNOG00000018215	Slc22a6	solute carrier family 22 member 6 [Source:RGD Symbol;Acc:69338]
ENSRNOG00000021097	55.2046	0.232603	0.198461	1.17203	0.241184	0.3224	ENSRNOG00000021097	Hpn	hepsin [Source:RGD Symbol;Acc:61982]
ENSRNOG00000047061	58.7891	-0.241931	0.197002	-1.22806	0.219424	0.298367	ENSRNOG00000047061	Zfp773-ps1	zinc finger protein 773, pseudogene 1 [Source:RGD Symbol;Acc:1563793]
ENSRNOG00000016627	66.7029	0.336112	0.251173	1.33817	0.180842	0.252379	ENSRNOG00000016627	Eya4	EYA transcriptional coactivator and phosphatase 4 [Source:RGD Symbol;Acc:1307099]
ENSRNOG00000021828	1971.73	-0.258662	0.0517137	-5.00182	5.67925e-07	2.46395e-06	ENSRNOG00000021828	Coro1b	coronin 1B [Source:RGD Symbol;Acc:2382]
ENSRNOG00000022742	325.492	-0.202898	0.0948381	-2.13941	0.0324025	0.0570185	ENSRNOG00000022742	Zfp954	zinc finger protein 954 [Source:RGD Symbol;Acc:1561308]
ENSRNOG00000016280	1161.5	0.133667	0.0558661	2.39262	0.0167283	0.0317233	ENSRNOG00000016280	Btrc	beta-transducin repeat containing E3 ubiquitin protein ligase [Source:RGD Symbol;Acc:1359721]
ENSRNOG00000016883	109.754	0.259376	0.161771	1.60336	0.108856	0.164314	ENSRNOG00000016883	Entpd7	ectonucleoside triphosphate diphosphohydrolase 7 [Source:RGD Symbol;Acc:1310638]
ENSRNOG00000012122	377.195	1.03777	0.136208	7.61901	2.55625e-14	2.86415e-13	ENSRNOG00000012122	Clvs2	clavesin 2 [Source:RGD Symbol;Acc:1306801]
ENSRNOG00000017412	80.4836	-0.311287	0.204629	-1.52122	0.128204	0.189134	ENSRNOG00000017412	AABR07001512.1
ENSRNOG00000013847	352.191	0.323929	0.102131	3.1717	0.0015155	0.003669	ENSRNOG00000013847	Nova2	NOVA alternative splicing regulator 2 [Source:RGD Symbol;Acc:1308032]
ENSRNOG00000059500	51.0273	-0.858593	0.235475	-3.64622	0.000266123	0.000746307	ENSRNOG00000059500	Cdkn1c	cyclin-dependent kinase inhibitor 1C [Source:RGD Symbol;Acc:727892]
ENSRNOG00000048495	550.787	-0.167448	0.0766019	-2.18595	0.028819	0.0514546	ENSRNOG00000048495	Rrp12	ribosomal RNA processing 12 [Source:RGD Symbol;Acc:1591867]
ENSRNOG00000013323	158.568	-0.0530964	0.145107	-0.365913	0.71443	0.777738	ENSRNOG00000013323	Rnf217	ring finger protein 217 [Source:RGD Symbol;Acc:1306836]
ENSRNOG00000020388	2341.23	0.29888	0.135065	2.21285	0.0269079	0.0484115	ENSRNOG00000020388	Inpp5f	inositol polyphosphate-5-phosphatase F [Source:RGD Symbol;Acc:1305777]
ENSRNOG00000013965	550.968	0.170196	0.0688762	2.47104	0.0134721	0.0262694	ENSRNOG00000013965	Noc3l	NOC3-like DNA replication regulator [Source:RGD Symbol;Acc:1560656]
ENSRNOG00000029608	642.174	-0.0106374	0.0923072	-0.115239	0.908255	0.932267	ENSRNOG00000029608	Nkain2	sodium/potassium transporting ATPase interacting 2 [Source:RGD Symbol;Acc:7740967]
ENSRNOG00000017419	1430.57	-0.079301	0.0529038	-1.49897	0.133882	0.196176	ENSRNOG00000017419	Map3k4	mitogen activated protein kinase kinase kinase 4 [Source:RGD Symbol;Acc:1311192]
ENSRNOG00000021102	18796.6	-0.516732	0.0602685	-8.57383	1.001e-17	1.62046e-16	ENSRNOG00000021102	Scn1b	sodium voltage-gated channel beta subunit 1 [Source:RGD Symbol;Acc:3631]
ENSRNOG00000014928	1945.02	0.282696	0.10039	2.81598	0.00486293	0.0106124	ENSRNOG00000014928	Apba1	amyloid beta precursor protein binding family A member 1 [Source:RGD Symbol;Acc:620844]
ENSRNOG00000014786	225.331	-0.156962	0.111398	-1.40901	0.158832	0.226584	ENSRNOG00000014786	Ccne1	cyclin E1 [Source:RGD Symbol;Acc:2294]
ENSRNOG00000019596	546.168	-0.202784	0.0814384	-2.49003	0.0127734	0.0250923	ENSRNOG00000019596	Smg9	SMG9 nonsense mediated mRNA decay factor [Source:RGD Symbol;Acc:1309888]
ENSRNOG00000017230	1442.38	0.228558	0.0590393	3.87129	0.000108261	0.000327921	ENSRNOG00000017230	Cox15	cytochrome c oxidase assembly homolog COX15 [Source:RGD Symbol;Acc:1312043]
ENSRNOG00000014485	1036.79	-0.187306	0.0672838	-2.78382	0.00537233	0.0115847	ENSRNOG00000014485	Pdcd6	programmed cell death 6 [Source:RGD Symbol;Acc:1311239]
ENSRNOG00000021098	100.092	-0.073614	0.164677	-0.44702	0.65486	0.728732	ENSRNOG00000021098	Rasgrp2	RAS guanyl releasing protein 2 [Source:RGD Symbol;Acc:1311630]
ENSRNOG00000051051	257.888	-0.00800814	0.104784	-0.076425	0.939081	0.954954	ENSRNOG00000051051	Pabir1	PP2A Aalpha (PPP2R1A) and B55A (PPP2R2A) interacting phosphatase regulator 1 [Source:RGD Symbol;Acc:1310316]
ENSRNOG00000011584	596.686	-0.142957	0.0718884	-1.9886	0.0467457	0.0786643	ENSRNOG00000011584	Gpatch1	G patch domain containing 1 [Source:RGD Symbol;Acc:1308935]
ENSRNOG00000024243	5397.08	-0.511363	0.0431053	-11.8631	1.84028e-32	1.19297e-30	ENSRNOG00000024243	Cadm4	cell adhesion molecule 4 [Source:RGD Symbol;Acc:1304722]
ENSRNOG00000015912	3045.94	-0.188563	0.0488426	-3.86062	0.000113101	0.000340805	ENSRNOG00000015912	Ptdss2	phosphatidylserine synthase 2 [Source:RGD Symbol;Acc:1307914]
ENSRNOG00000028247	1387.97	-0.16241	0.0585375	-2.77445	0.00552946	0.011882	ENSRNOG00000028247	Ankrd13d	ankyrin repeat domain 13D [Source:RGD Symbol;Acc:1309156]
ENSRNOG00000016434	90.0711	-0.119803	0.183973	-0.651198	0.514919	0.603676	ENSRNOG00000016434	Prkd2	protein kinase D2 [Source:RGD Symbol;Acc:1308054]
ENSRNOG00000013331	9052.09	-0.13053	0.0390856	-3.3396	0.000838993	0.00214134	ENSRNOG00000013331	Sdha	succinate dehydrogenase complex flavoprotein subunit A [Source:RGD Symbol;Acc:621557]
ENSRNOG00000036592	338.739	0.515954	0.108504	4.75515	1.98301e-06	7.99646e-06	ENSRNOG00000036592	Zfp518a	zinc finger protein 518A [Source:RGD Symbol;Acc:1305314]
ENSRNOG00000021067	1371.55	-0.531559	0.096974	-5.48146	4.21831e-08	2.15835e-07	ENSRNOG00000021067	Fxyd7	FXYD domain-containing ion transport regulator 7 [Source:RGD Symbol;Acc:620830]
ENSRNOG00000021175	523.142	-0.427504	0.072894	-5.86474	4.4984e-09	2.65644e-08	ENSRNOG00000021175	Otub1	OTU deubiquitinase, ubiquitin aldehyde binding 1 [Source:RGD Symbol;Acc:1311329]
ENSRNOG00000018137	1254.9	0.153659	0.0569354	2.69883	0.00695843	0.0145806	ENSRNOG00000018137	Tubgcp2	tubulin, gamma complex associated protein 2 [Source:RGD Symbol;Acc:1309597]
ENSRNOG00000021644	57.76	0.576177	0.22972	2.50817	0.0121357	0.0239791	ENSRNOG00000021644	Slc15a3	solute carrier family 15 member 3 [Source:RGD Symbol;Acc:628663]
ENSRNOG00000014163	744.425	-0.0275603	0.107681	-0.255943	0.797995	0.846002	ENSRNOG00000014163	Zfp536	zinc finger protein 536 [Source:RGD Symbol;Acc:1563363]
ENSRNOG00000057569	1331.15	0.268736	0.172371	1.55906	0.118983	0.177607	ENSRNOG00000057569	Ahnak	AHNAK nucleoprotein [Source:RGD Symbol;Acc:619779]
ENSRNOG00000019915	1898.66	0.0939542	0.0735856	1.2768	0.201672	0.277239	ENSRNOG00000019915	Xrcc1	X-ray repair cross complementing 1 [Source:RGD Symbol;Acc:619823]
ENSRNOG00000017164	2733.45	-0.251406	0.0804025	-3.12684	0.00176696	0.00422424	ENSRNOG00000017164	Afap1l2	actin filament associated protein 1-like 2 [Source:RGD Symbol;Acc:1310668]
ENSRNOG00000020781	901.201	-0.417094	0.075311	-5.53829	3.05444e-08	1.5993e-07	ENSRNOG00000020781	Tbcb	tubulin folding cofactor B [Source:RGD Symbol;Acc:1309965]
ENSRNOG00000021338	9106.19	-0.557227	0.0781208	-7.13289	9.82817e-13	9.14253e-12	ENSRNOG00000021338	Tmem132a	transmembrane protein 132A [Source:RGD Symbol;Acc:727936]
ENSRNOG00000032042	837.554	0.00388038	0.070695	0.054889	0.956227	0.968567	ENSRNOG00000032042	Zfta	zinc finger translocation associated [Source:RGD Symbol;Acc:1560108]
ENSRNOG00000014190	361.974	-0.188744	0.0865479	-2.1808	0.0291982	0.0520357	ENSRNOG00000014190	Hint3	histidine triad nucleotide binding protein 3 [Source:RGD Symbol;Acc:621603]
ENSRNOG00000018985	8491.71	-0.239058	0.0350786	-6.81493	9.43075e-12	7.80308e-11	ENSRNOG00000018985	Grk2	G protein-coupled receptor kinase 2 [Source:RGD Symbol;Acc:2062]
ENSRNOG00000020799	359.046	-0.538183	0.0941155	-5.71832	1.07581e-08	6.02229e-08	ENSRNOG00000020799	Polr2i	RNA polymerase II subunit I [Source:RGD Symbol;Acc:1309395]
ENSRNOG00000036641	21.3957	0.0973741	0.298127	0.326619	0.743956	0.802703	ENSRNOG00000036641	LOC689065	RIKEN cDNA 2010003K11 gene [Source:MGI Symbol;Acc:MGI:1917111]
ENSRNOG00000022485	1023.91	0.872773	0.0839761	10.3931	2.66511e-25	9.00002e-24	ENSRNOG00000022485	Chuk	component of inhibitor of nuclear factor kappa B kinase complex [Source:RGD Symbol;Acc:1306661]
ENSRNOG00000062751	32.0504	0.44372	0.297127	1.49336	0.135342	0.197955	ENSRNOG00000062751	Ovol3	ovo-like zinc finger 3 [Source:RGD Symbol;Acc:1583800]
ENSRNOG00000069113	1497.24	-0.517122	0.0528291	-9.78859	1.26044e-22	3.33993e-21	ENSRNOG00000069113	Rpl26-ps2	ribosomal protein L26, pseudogene 2 [Source:RGD Symbol;Acc:1565215]
ENSRNOG00000066174	81.021	0.521249	0.219879	2.37062	0.0177583	0.0334157	ENSRNOG00000066174
ENSRNOG00000018272	350.907	-0.135365	0.079671	-1.69905	0.0893105	0.138526	ENSRNOG00000018272	Zfp511	zinc finger protein 511 [Source:RGD Symbol;Acc:1308585]
ENSRNOG00000066988	177.031	0.837022	0.14453	5.79135	6.98237e-09	4.0028e-08	ENSRNOG00000066988	Tbpl1	TATA-box binding protein like 1 [Source:RGD Symbol;Acc:1597456]
ENSRNOG00000024677	528.503	0.212375	0.101177	2.09904	0.0358137	0.0623338	ENSRNOG00000024677	Arhgap33	Rho GTPase activating protein 33 [Source:RGD Symbol;Acc:2318374]
ENSRNOG00000016416	1547.12	-0.347728	0.0441678	-7.87288	3.46567e-15	4.29761e-14	ENSRNOG00000016416	Rnh1	ribonuclease/angiogenin inhibitor 1 [Source:RGD Symbol;Acc:621398]
ENSRNOG00000011114	69.0233	1.88995	0.202908	9.31435	1.22707e-20	2.63584e-19	ENSRNOG00000011114	Tbpl1	TATA-box binding protein like 1 [Source:RGD Symbol;Acc:1597456]
ENSRNOG00000030572	1962.63	0.616922	0.0602488	10.2396	1.3182e-24	4.2162e-23	ENSRNOG00000030572	Smc5	structural maintenance of chromosomes 5 [Source:RGD Symbol;Acc:1307492]
ENSRNOG00000017731	1924.02	-0.306282	0.0466203	-6.56972	5.04104e-11	3.83653e-10	ENSRNOG00000017731	Agpat4	1-acylglycerol-3-phosphate O-acyltransferase 4 [Source:RGD Symbol;Acc:619916]
ENSRNOG00000020689	1760.61	0.831058	0.0730019	11.3841	5.02059e-30	2.71018e-28	ENSRNOG00000020689	Cpeb3	cytoplasmic polyadenylation element binding protein 3 [Source:RGD Symbol;Acc:1564670]
ENSRNOG00000021202	15814.6	-0.116707	0.0306153	-3.81207	0.000137809	0.000408061	ENSRNOG00000021202	Rtn3	reticulon 3 [Source:RGD Symbol;Acc:620988]
ENSRNOG00000011161	158.913	-0.0930763	0.128514	-0.724252	0.468911	0.55922	ENSRNOG00000011161	Slc2a12	solute carrier family 2 member 12 [Source:RGD Symbol;Acc:1310175]
ENSRNOG00000017298	256.218	-0.0787908	0.0951344	-0.828206	0.407554	0.497402	ENSRNOG00000017298	Cutc	cutC copper transporter [Source:RGD Symbol;Acc:1304966]
ENSRNOG00000046776	24.2314	-0.35076	0.343897	-1.01996	0.307749	0.395017	ENSRNOG00000046776	Msx3	msh homeobox 3 [Source:RGD Symbol;Acc:620932]
ENSRNOG00000013364	95.2432	-0.207095	0.178727	-1.15872	0.24657	0.328752	ENSRNOG00000013364	Hey2	hes-related family bHLH transcription factor with YRPW motif 2 [Source:RGD Symbol;Acc:621405]
ENSRNOG00000021137	466.786	-0.396714	0.0891352	-4.4507	8.55907e-06	3.12985e-05	ENSRNOG00000021137	Kctd15	potassium channel tetramerization domain containing 15 [Source:RGD Symbol;Acc:1583737]
ENSRNOG00000020480	3549.21	-0.283118	0.052477	-5.39509	6.84911e-08	3.40836e-07	ENSRNOG00000020480	Fads1	fatty acid desaturase 1 [Source:RGD Symbol;Acc:621678]
ENSRNOG00000036598	652.809	0.597929	0.0837574	7.13882	9.41377e-13	8.76827e-12	ENSRNOG00000036598	Tbc1d12	TBC1 domain family, member 12 [Source:RGD Symbol;Acc:9377071]
ENSRNOG00000014240	149.71	-0.0200888	0.14288	-0.140599	0.888186	0.917159	ENSRNOG00000014240	Trmt11	tRNA methyltransferase 11 homolog [Source:RGD Symbol;Acc:727798]
ENSRNOG00000020394	728.316	-0.0493783	0.0648877	-0.760981	0.446668	0.536926	ENSRNOG00000020394	Mcmbp	minichromosome maintenance complex binding protein [Source:RGD Symbol;Acc:1306730]
ENSRNOG00000057578	26.5484	0.121075	0.359674	0.336626	0.736399	0.796874	ENSRNOG00000057578	Prodh2	proline dehydrogenase 2 [Source:RGD Symbol;Acc:1306761]
ENSRNOG00000019968	1637	-0.208238	0.0528739	-3.9384	8.20284e-05	0.000253703	ENSRNOG00000019968	Trim8	tripartite motif-containing 8 [Source:RGD Symbol;Acc:1585223]
ENSRNOG00000063244	604.972	0.39228	0.375278	1.0453	0.295882	0.381742	ENSRNOG00000063244	Mpeg1	macrophage expressed 1 [Source:RGD Symbol;Acc:69275]
ENSRNOG00000021144	1472.28	0.156263	0.0503312	3.1047	0.00190471	0.00452081	ENSRNOG00000021144	Cebpg	CCAAT/enhancer binding protein gamma [Source:RGD Symbol;Acc:2330]
ENSRNOG00000011588	1426.84	-0.0203276	0.0553143	-0.367493	0.713252	0.776629	ENSRNOG00000011588	Rnf146	ring finger protein 146 [Source:RGD Symbol;Acc:1306482]
ENSRNOG00000018337	3603.26	-0.502742	0.0595405	-8.4437	3.07444e-17	4.73927e-16	ENSRNOG00000018337	Caly	calcyon neuron-specific vesicular protein [Source:RGD Symbol;Acc:621719]
ENSRNOG00000028017	1703.6	-0.36806	0.0548507	-6.71021	1.94339e-11	1.55998e-10	ENSRNOG00000028017	Tmem109	transmembrane protein 109 [Source:RGD Symbol;Acc:1359538]
ENSRNOG00000020514	89.4363	0.517849	0.185487	2.79184	0.00524091	0.011335	ENSRNOG00000020514	Sox6	SRY-box transcription factor 6 [Source:RGD Symbol;Acc:1309000]
ENSRNOG00000018237	1337.98	-0.164041	0.0764075	-2.14692	0.0317993	0.0561066	ENSRNOG00000018237	Gstp1	glutathione S-transferase pi 1 [Source:RGD Symbol;Acc:2758]
ENSRNOG00000027724	524.104	-0.471893	0.137337	-3.43601	0.000590344	0.00155947	ENSRNOG00000027724	Plekhf1	pleckstrin homology and FYVE domain containing 1 [Source:RGD Symbol;Acc:1310544]
ENSRNOG00000011622	806.64	-0.185064	0.0859501	-2.15316	0.0313065	0.0553716	ENSRNOG00000011622	Echdc1	ethylmalonyl-CoA decarboxylase 1 [Source:RGD Symbol;Acc:1359654]
ENSRNOG00000021119	207.089	-0.383583	0.11377	-3.37156	0.000747428	0.00193018	ENSRNOG00000021119	Pdcd2l	programmed cell death 2-like [Source:RGD Symbol;Acc:1589941]
ENSRNOG00000019311	80.9337	-0.0212771	0.208153	-0.102219	0.918583	0.94001	ENSRNOG00000019311	Nfkb2	nuclear factor kappa B subunit 2 [Source:RGD Symbol;Acc:1307189]
ENSRNOG00000055547	97.787	-0.2539	0.175525	-1.44652	0.148032	0.213314	ENSRNOG00000055547	Prkn	parkin RBR E3 ubiquitin protein ligase [Source:RGD Symbol;Acc:61797]
ENSRNOG00000021086	175.568	-0.118402	0.144278	-0.820652	0.411844	0.501772	ENSRNOG00000021086	Dtx4	deltex E3 ubiquitin ligase 4 [Source:RGD Symbol;Acc:1311767]
ENSRNOG00000013938	469.255	0.16528	0.090782	1.82062	0.0686647	0.110114	ENSRNOG00000013938	Tshz3	teashirt zinc finger homeobox 3 [Source:RGD Symbol;Acc:1306322]
ENSRNOG00000012458	35.1781	0.866006	0.278016	3.11495	0.00183978	0.00438031	ENSRNOG00000012458	Cyp2e1	cytochrome P450, family 2, subfamily e, polypeptide 1 [Source:RGD Symbol;Acc:2475]
ENSRNOG00000064485	155.06	0.708466	0.132942	5.32914	9.86767e-08	4.79386e-07	ENSRNOG00000064485	Znf431l-ps8	zinc finger protein 431 like, pseudogene 8 [Source:RGD Symbol;Acc:7704592]
ENSRNOG00000019435	2047.51	-0.260664	0.090415	-2.88297	0.00393947	0.00877243	ENSRNOG00000019435	Psd	pleckstrin and Sec7 domain containing [Source:RGD Symbol;Acc:620297]
ENSRNOG00000024266	617.306	-0.203062	0.0931191	-2.18067	0.0292081	0.052047	ENSRNOG00000024266	Haus5	HAUS augmin-like complex, subunit 5 [Source:RGD Symbol;Acc:2318093]
ENSRNOG00000017414	91.9357	0.720412	0.241215	2.9866	0.00282101	0.00647139	ENSRNOG00000017414	Irf7	interferon regulatory factor 7 [Source:RGD Symbol;Acc:1307828]
ENSRNOG00000066874	22.2723	0.238696	0.346395	0.689087	0.490769	0.580188	ENSRNOG00000066874
ENSRNOG00000018860	318.942	-0.172166	0.0971642	-1.77191	0.0764092	0.120773	ENSRNOG00000018860	Mtg1	mitochondrial ribosome-associated GTPase 1 [Source:RGD Symbol;Acc:6497155]
ENSRNOG00000016960	793.994	0.19089	0.0687607	2.77615	0.00550062	0.0118333	ENSRNOG00000016960	Polr3e	RNA polymerase III subunit E [Source:RGD Symbol;Acc:1308086]
ENSRNOG00000042309	1801.35	0.449858	0.0517715	8.68929	3.64711e-18	6.19412e-17	ENSRNOG00000042309	Kiaa0408L	Kiaa0408-like [Source:RGD Symbol;Acc:1307525]
ENSRNOG00000019509	160.254	-0.734255	0.177679	-4.13248	3.58873e-05	0.00011798	ENSRNOG00000019509	Fbxl15	F-box and leucine-rich repeat protein 15 [Source:RGD Symbol;Acc:1306444]
ENSRNOG00000016166	55.6759	0.28692	0.2452	1.17014	0.241944	0.323264	ENSRNOG00000016166	Pdlim1	PDZ and LIM domain 1 [Source:RGD Symbol;Acc:68324]
ENSRNOG00000012324	866.361	0.212017	0.0957502	2.21427	0.0268104	0.048248	ENSRNOG00000012324	Soga3	SOGA family member 3 [Source:RGD Symbol;Acc:11479453]
ENSRNOG00000019574	124.17	-0.303813	0.144348	-2.10473	0.0353146	0.0615388	ENSRNOG00000019574	Cuedc2	CUE domain containing 2 [Source:RGD Symbol;Acc:1308096]
ENSRNOG00000017396	1602.04	0.415455	0.0607822	6.83514	8.19248e-12	6.83695e-11	ENSRNOG00000017396	Marchf5	membrane associated ring-CH-type finger 5 [Source:RGD Symbol;Acc:1305617]
ENSRNOG00000028261	1158.11	0.0606545	0.105811	0.573235	0.566485	0.650837	ENSRNOG00000028261	Tppp	tubulin polymerization promoting protein [Source:RGD Symbol;Acc:1310121]
ENSRNOG00000020985	92.8865	-0.462736	0.180773	-2.55976	0.0104744	0.0210023	ENSRNOG00000020985	Atp4a	ATPase H+/K+ transporting subunit alpha [Source:RGD Symbol;Acc:2177]
ENSRNOG00000067971	1220.97	-0.197619	0.0808149	-2.44533	0.0144718	0.0279784	ENSRNOG00000067971	Sprn	shadow of prion protein [Source:RGD Symbol;Acc:1561845]
ENSRNOG00000013971	1598.36	-0.124187	0.0665561	-1.8659	0.0620553	0.100896	ENSRNOG00000013971	Psat1	phosphoserine aminotransferase 1 [Source:RGD Symbol;Acc:735170]
ENSRNOG00000021054	1411.09	-0.0842007	0.0577593	-1.45779	0.144899	0.209674	ENSRNOG00000021054	Men1	menin 1 [Source:RGD Symbol;Acc:3078]
ENSRNOG00000025353	130.852	0.647213	0.141118	4.58631	4.51138e-06	1.72213e-05	ENSRNOG00000025353	Ears2	glutamyl-tRNA synthetase 2, mitochondrial [Source:RGD Symbol;Acc:1307904]
ENSRNOG00000019936	422.856	-0.228914	0.0901016	-2.54062	0.0110657	0.0220358	ENSRNOG00000019936	Anapc15	anaphase promoting complex subunit 15 [Source:RGD Symbol;Acc:1311634]
ENSRNOG00000021156	540.203	-0.32	0.0812285	-3.9395	8.16527e-05	0.000252756	ENSRNOG00000021156	Vegfb	vascular endothelial growth factor B [Source:RGD Symbol;Acc:619799]
ENSRNOG00000028357	74.9169	-0.0390113	0.180647	-0.215954	0.829024	0.870571	ENSRNOG00000028357	Lrrc14b	leucine rich repeat containing 14B [Source:RGD Symbol;Acc:1564978]
ENSRNOG00000066093	947.517	0.26567	0.0636313	4.17515	2.97784e-05	9.90862e-05	ENSRNOG00000066093	Ccdc127	coiled-coil domain containing 127 [Source:RGD Symbol;Acc:735106]
ENSRNOG00000015051	795.259	-0.45964	0.0937568	-4.90247	9.46382e-07	3.981e-06	ENSRNOG00000015051	Golga7b	golgin A7 family, member B [Source:RGD Symbol;Acc:1583839]
ENSRNOG00000021061	2291.92	0.314726	0.0604132	5.20955	1.89295e-07	8.83557e-07	ENSRNOG00000021061	Map4k2	mitogen activated protein kinase kinase kinase kinase 2 [Source:RGD Symbol;Acc:1308199]
ENSRNOG00000014966	1112.26	0.0534592	0.0583131	0.916761	0.359268	0.448459	ENSRNOG00000014966	LOC690000	similar to CG3740-PA [Source:RGD Symbol;Acc:1585208]
ENSRNOG00000020016	1376.87	-0.415583	0.0566946	-7.33021	2.29794e-13	2.28708e-12	ENSRNOG00000020016	Lamtor1	RhoA activator C11orf59-like [Source:RGD Symbol;Acc:2319924]
ENSRNOG00000063986	30.0439	0.889251	0.318009	2.79631	0.00516897	0.0112028	ENSRNOG00000063986
ENSRNOG00000015220	387.479	-0.0691064	0.108378	-0.637642	0.523706	0.612002	ENSRNOG00000015220	Crtac1	cartilage acidic protein 1 [Source:RGD Symbol;Acc:621085]
ENSRNOG00000020124	47.6677	-0.0881203	0.241769	-0.364481	0.715499	0.778609	ENSRNOG00000020124	Lrrc51	leucine rich repeat containing 51 [Source:RGD Symbol;Acc:1565856]
ENSRNOG00000062531	1189.62	-0.553439	0.0728835	-7.59348	3.11432e-14	3.44951e-13	ENSRNOG00000062531	Ndufs6l1	NADH:ubiquinone oxidoreductase subunit S6-like 1 [Source:RGD Symbol;Acc:1584802]
ENSRNOG00000020646	1403.23	-0.0438517	0.0509228	-0.86114	0.389161	0.478615	ENSRNOG00000020646	Sdhaf2	succinate dehydrogenase complex assembly factor 2 [Source:RGD Symbol;Acc:1309216]
ENSRNOG00000043060	477.067	-0.281449	0.0848074	-3.31868	0.000904447	0.00229406	ENSRNOG00000043060	Dnajc4	DnaJ heat shock protein family (Hsp40) member C4 [Source:RGD Symbol;Acc:1308693]
ENSRNOG00000017938	1760.44	0.503485	0.0633321	7.94992	1.86639e-15	2.37735e-14	ENSRNOG00000017938	Btaf1	B-TFIID TATA-box binding protein associated factor 1 [Source:RGD Symbol;Acc:1564130]
ENSRNOG00000039776	1398.43	-0.180136	0.0564629	-3.19035	0.00142099	0.00345748	ENSRNOG00000039776	Exoc3	exocyst complex component 3 [Source:RGD Symbol;Acc:621790]
ENSRNOG00000053659	2319.24	-0.155534	0.0521526	-2.98228	0.0028611	0.00655506	ENSRNOG00000053659	C1h11orf58	similar to human chromosome 11 open reading frame 58 [Source:RGD Symbol;Acc:1311703]
ENSRNOG00000000417	4720.36	0.0284279	0.0613557	0.463329	0.643128	0.718098	ENSRNOG00000000417	Numa1	nuclear mitotic apparatus protein 1 [Source:RGD Symbol;Acc:1308777]
ENSRNOG00000018243	1161.1	0.107678	0.0555771	1.93745	0.0526905	0.0874222	ENSRNOG00000018243	Ubfd1	ubiquitin family domain containing 1 [Source:RGD Symbol;Acc:1306614]
ENSRNOG00000015159	374.152	0.284883	0.0831056	3.42796	0.000608143	0.00159892	ENSRNOG00000015159	Slc9a3	solute carrier family 9 member A3 [Source:RGD Symbol;Acc:3720]
ENSRNOG00000033609	92.8828	-0.831835	0.152232	-5.46427	4.64809e-08	2.36741e-07	ENSRNOG00000033609	Irx1	iroquois homeobox 1 [Source:RGD Symbol;Acc:1309060]
ENSRNOG00000015213	366.401	-0.452521	0.0908184	-4.9827	6.27032e-07	2.70423e-06	ENSRNOG00000015213	Fxn	frataxin [Source:RGD Symbol;Acc:1565754]
ENSRNOG00000027590	1020.85	0.14189	0.0549083	2.58413	0.00976259	0.0197249	ENSRNOG00000027590	Jakmip3	janus kinase and microtubule interacting protein 3 [Source:RGD Symbol;Acc:1307177]
ENSRNOG00000021203	335.6	0.632471	0.104193	6.0702	1.27753e-09	8.11863e-09	ENSRNOG00000021203	Atl3	atlastin GTPase 3 [Source:RGD Symbol;Acc:1309871]
ENSRNOG00000020150	208.545	0.301398	0.124732	2.41635	0.0156769	0.0300124	ENSRNOG00000020150	Il18bp	interleukin 18 binding protein [Source:RGD Symbol;Acc:620042]
ENSRNOG00000019570	2931.44	-0.594423	0.0589049	-10.0912	6.0412e-24	1.84295e-22	ENSRNOG00000019570	Gng3	G protein subunit gamma 3 [Source:RGD Symbol;Acc:620805]
ENSRNOG00000021006	595.971	-0.198007	0.0697371	-2.83934	0.00452075	0.0099343	ENSRNOG00000021006	Tmem147	transmembrane protein 147 [Source:RGD Symbol;Acc:1304706]
ENSRNOG00000024073	27.1183	-0.113951	0.337093	-0.338041	0.735333	0.795957	ENSRNOG00000024073	Syce1	synaptonemal complex central element protein 1 [Source:RGD Symbol;Acc:1559853]
ENSRNOG00000068261	38.6755	-0.551146	0.22978	-2.39858	0.0164588	0.0312948	ENSRNOG00000068261	Pacrg	parkin coregulated [Source:RGD Symbol;Acc:1561027]
ENSRNOG00000020009	48.2309	0.971985	0.72049	1.34906	0.177317	0.248274	ENSRNOG00000020009	Npas4	neuronal PAS domain protein 4 [Source:RGD Symbol;Acc:628866]
ENSRNOG00000037380	140.318	0.319099	0.146316	2.18089	0.0291918	0.0520307	ENSRNOG00000037380	AC136661.1
ENSRNOG00000020175	565.863	0.117312	0.0635748	1.84526	0.0649995	0.105013	ENSRNOG00000020175	Rnf121	ring finger protein 121 [Source:RGD Symbol;Acc:1307857]
ENSRNOG00000018476	189.511	-0.419031	0.121901	-3.43747	0.000587166	0.00155163	ENSRNOG00000018476	Fuom	fucose mutarotase [Source:RGD Symbol;Acc:1311186]
ENSRNOG00000052393	2308.9	-0.216316	0.047606	-4.54388	5.52292e-06	2.07983e-05	ENSRNOG00000052393	Bscl2	BSCL2 lipid droplet biogenesis associated, seipin [Source:RGD Symbol;Acc:1308135]
ENSRNOG00000048297	3240.08	0.725508	0.0660529	10.9837	4.57543e-28	2.03803e-26	ENSRNOG00000048297	Qki	QKI, KH domain containing RNA binding [Source:RGD Symbol;Acc:1584886]
ENSRNOG00000021164	5440.59	-0.203812	0.0513537	-3.96878	7.22405e-05	0.000225741	ENSRNOG00000021164	Stip1	stress-induced phosphoprotein 1 [Source:RGD Symbol;Acc:621599]
ENSRNOG00000020188	284.14	-0.214467	0.0864784	-2.48001	0.013138	0.0256661	ENSRNOG00000020188	Trpc2	transient receptor potential cation channel subfamily C member 2 [Source:RGD Symbol;Acc:628819]
ENSRNOG00000021009	126.131	-0.339922	0.163983	-2.07291	0.0381806	0.0659083	ENSRNOG00000021009	Gapdhs	glyceraldehyde-3-phosphate dehydrogenase, spermatogenic [Source:RGD Symbol;Acc:620150]
ENSRNOG00000015676	1297.42	-0.0427081	0.0617474	-0.691658	0.489152	0.578618	ENSRNOG00000015676	Brd9	bromodomain containing 9 [Source:RGD Symbol;Acc:1307359]
ENSRNOG00000018129	1545.8	-0.463941	0.0566132	-8.19493	2.50742e-16	3.5179e-15	ENSRNOG00000018129	Ndufab1	NADH:ubiquinone oxidoreductase subunit AB1 [Source:RGD Symbol;Acc:1305619]
ENSRNOG00000021015	94.1843	0.0878456	0.165335	0.531318	0.595198	0.676546	ENSRNOG00000021015	Sbsn	suprabasin [Source:RGD Symbol;Acc:1562305]
ENSRNOG00000020668	3075.17	0.435341	0.0548972	7.93011	2.18958e-15	2.76237e-14	ENSRNOG00000020668	Cpsf7	cleavage and polyadenylation specific factor 7 [Source:RGD Symbol;Acc:1305441]
ENSRNOG00000014037	56.1782	0.261301	0.231808	1.12723	0.259645	0.342879	ENSRNOG00000014037	Dcun1d3	defective in cullin neddylation 1 domain containing 3 [Source:RGD Symbol;Acc:1308893]
ENSRNOG00000013443	2135.93	0.351153	0.0575785	6.09868	1.0695e-09	6.86875e-09	ENSRNOG00000013443	Tm9sf3	transmembrane 9 superfamily member 3 [Source:RGD Symbol;Acc:1564625]
ENSRNOG00000019302	1243.5	-0.151798	0.0524973	-2.89155	0.00383351	0.00856142	ENSRNOG00000019302	Stx4	syntaxin 4 [Source:RGD Symbol;Acc:621019]
ENSRNOG00000021079	1734.3	-0.35559	0.0729362	-4.87536	1.08609e-06	4.54367e-06	ENSRNOG00000021079	Fxyd1	FXYD domain-containing ion transport regulator 1 [Source:RGD Symbol;Acc:69306]
ENSRNOG00000069673	732.734	-0.16419	0.0728707	-2.25316	0.0242488	0.0441692	ENSRNOG00000069673	Pnpla2	patatin-like phospholipase domain containing 2 [Source:RGD Symbol;Acc:1309044]
ENSRNOG00000048275	30.9888	-0.789627	0.372729	-2.1185	0.0341325	0.0597586	ENSRNOG00000048275	RGD1309350	similar to transthyretin (4L369) [Source:RGD Symbol;Acc:1309350]
ENSRNOG00000021158	348.349	-0.274195	0.109581	-2.50222	0.0123418	0.0243367	ENSRNOG00000021158	Nudt22	nudix hydrolase 22 [Source:RGD Symbol;Acc:735224]
ENSRNOG00000021087	3940.62	-0.28252	0.0543872	-5.19461	2.0515e-07	9.53582e-07	ENSRNOG00000021087	Lgi4	leucine-rich repeat LGI family, member 4 [Source:RGD Symbol;Acc:735035]
ENSRNOG00000017469	33.4196	-1.00519	0.262202	-3.83367	0.000126245	0.00037697	ENSRNOG00000017469	Anxa1	annexin A1 [Source:RGD Symbol;Acc:2118]
ENSRNOG00000011310	875.531	0.620819	0.193436	3.20942	0.00133002	0.00325851	ENSRNOG00000011310	Pde10a	phosphodiesterase 10A [Source:RGD Symbol;Acc:68434]
ENSRNOG00000023023	205.226	-0.060962	0.106561	-0.572084	0.567265	0.651579	ENSRNOG00000023023	Trpt1	tRNA phosphotransferase 1 [Source:RGD Symbol;Acc:1310831]
ENSRNOG00000021161	44.2849	-0.0520848	0.244903	-0.212675	0.83158	0.872624	ENSRNOG00000021161	Fermt3	FERM domain containing kindlin 3 [Source:RGD Symbol;Acc:1310168]
ENSRNOG00000014463	955.604	0.24078	0.0935238	2.57453	0.0100377	0.0202188	ENSRNOG00000014463	Uri1	URI1, prefoldin-like chaperone [Source:RGD Symbol;Acc:1310358]
ENSRNOG00000018367	2056.92	-0.502897	0.0537466	-9.3568	8.21861e-21	1.81925e-19	ENSRNOG00000018367	Taldo1	transaldolase 1 [Source:RGD Symbol;Acc:620674]
ENSRNOG00000015321	260.462	-0.355852	0.137737	-2.58357	0.00977848	0.0197478	ENSRNOG00000015321	Moxd1	monooxygenase, DBH-like 1 [Source:RGD Symbol;Acc:1310033]
ENSRNOG00000027646	955.641	-0.373508	0.0681466	-5.48095	4.23052e-08	2.16384e-07	ENSRNOG00000027646	Pop4	POP4 homolog, ribonuclease P/MRP subunit [Source:RGD Symbol;Acc:1305955]
ENSRNOG00000011399	22.2278	-0.093124	0.305509	-0.304815	0.760507	0.815896	ENSRNOG00000011399	LOC100912436	uncharacterized LOC100912436 [Source:RGD Symbol;Acc:6486936]
ENSRNOG00000011885	198.069	-0.129377	0.107178	-1.20712	0.227385	0.307036	ENSRNOG00000011885	Rhpn2	rhophilin, Rho GTPase binding protein 2 [Source:RGD Symbol;Acc:1308366]
ENSRNOG00000019807	863.393	-0.159654	0.0691879	-2.30754	0.0210246	0.0387581	ENSRNOG00000019807	Sufu	SUFU negative regulator of hedgehog signaling [Source:RGD Symbol;Acc:1559462]
ENSRNOG00000070586	360.039	-0.236938	0.116592	-2.0322	0.0421337	0.0717513	ENSRNOG00000070586	Prr18	proline rich 18 [Source:RGD Symbol;Acc:1564079]
ENSRNOG00000033517	212.408	-0.20507	0.451777	-0.453918	0.649888	0.724309	ENSRNOG00000033517	LOC100360791	tumor protein, translationally-controlled 1 [Source:RGD Symbol;Acc:2321467]
ENSRNOG00000060849	152.686	-0.059193	0.136311	-0.43425	0.664107	0.736371	ENSRNOG00000060849	Rcor2l1	REST corepressor 2 [Source:RGD Symbol;Acc:1359467]
ENSRNOG00000052814	594.442	0.0902079	0.0855014	1.05505	0.291404	0.376903	ENSRNOG00000052814	Ankrd27	ankyrin repeat domain 27 [Source:RGD Symbol;Acc:1307106]
ENSRNOG00000024140	408.726	0.178554	0.111109	1.60702	0.10805	0.163232	ENSRNOG00000024140	Sft2d1	SFT2 domain containing 1 [Source:RGD Symbol;Acc:1359119]
ENSRNOG00000024620	35.1402	-0.00283062	0.231431	-0.0122309	0.990241	0.993045	ENSRNOG00000024620	Mamdc2	MAM domain containing 2 [Source:RGD Symbol;Acc:1305129]
ENSRNOG00000068524	33.4573	-0.644432	0.317729	-2.02825	0.042535	0.0723499	ENSRNOG00000068524	LOC108349831	40S ribosomal protein S29 pseudogene [Source:RGD Symbol;Acc:11452897]
ENSRNOG00000012415	2355.76	0.0066978	0.0415614	0.161154	0.871972	0.905369	ENSRNOG00000012415	Mpc1	mitochondrial pyruvate carrier 1 [Source:RGD Symbol;Acc:620902]
ENSRNOG00000022393	60.2491	-0.327673	0.225689	-1.45188	0.146536	0.211537	ENSRNOG00000022393	Faap24	FA core complex associated protein 24 [Source:RGD Symbol;Acc:1564719]
ENSRNOG00000013309	49.8789	0.445885	0.21962	2.03026	0.0423302	0.0720521	ENSRNOG00000013309	Pik3ap1	phosphoinositide-3-kinase adaptor protein 1 [Source:RGD Symbol;Acc:1307744]
ENSRNOG00000021129	1221.35	0.0396744	0.0586315	0.676673	0.498613	0.588074	ENSRNOG00000021129	Garre1	granule associated Rac and RHOG effector 1 [Source:RGD Symbol;Acc:1308428]
ENSRNOG00000013053	28.2673	-0.112179	0.298358	-0.375988	0.706926	0.771573	ENSRNOG00000013053	Trpm6	transient receptor potential cation channel, subfamily M, member 6 [Source:RGD Symbol;Acc:1309942]
ENSRNOG00000065068	406.912	0.416814	0.108145	3.85422	0.000116101	0.000349049	ENSRNOG00000065068	LOC100912659	zinc finger protein 709-like [Source:RGD Symbol;Acc:6485855]
ENSRNOG00000016930	1238.28	-0.469963	0.0602507	-7.80013	6.18429e-15	7.45865e-14	ENSRNOG00000016930	Ube2s	ubiquitin-conjugating enzyme E2S [Source:RGD Symbol;Acc:1564746]
ENSRNOG00000029336	5081.45	-0.356529	0.0438595	-8.12889	4.33229e-16	5.92924e-15	ENSRNOG00000029336	Zfp180	zinc finger protein 180 [Source:RGD Symbol;Acc:631380]
ENSRNOG00000064505	29.5058	-0.157063	0.405411	-0.387418	0.698447	0.764383	ENSRNOG00000064505	Spry3-ps1	sprouty RTK signaling antagonist 3, pseudogene 1 [Source:RGD Symbol;Acc:1564382]
ENSRNOG00000029022	386.738	-0.272473	0.0939188	-2.90115	0.00371792	0.00832636	ENSRNOG00000029022	Zfp112	zinc finger protein 112 [Source:RGD Symbol;Acc:1305757]
ENSRNOG00000021184	1605.57	-0.126684	0.0576672	-2.19681	0.0280338	0.0501948	ENSRNOG00000021184	Mark2	microtubule affinity regulating kinase 2 [Source:RGD Symbol;Acc:708483]
ENSRNOG00000012847	39.8543	0.279865	0.22535	1.24191	0.21427	0.29229	ENSRNOG00000012847	Scgb1c1	secretoglobin, family 1C, member 1 [Source:RGD Symbol;Acc:1561432]
ENSRNOG00000065539	20.9323	0.354726	0.334659	1.05996	0.289161	0.374452	ENSRNOG00000065539	Mob1a-ps1	MOB kinase activator 1A, pseudogene 1 [Source:RGD Symbol;Acc:1590598]
ENSRNOG00000012858	35.0674	1.1204	0.284709	3.93524	8.31125e-05	0.000256727	ENSRNOG00000012858	Odf3	outer dense fiber of sperm tails 3 [Source:RGD Symbol;Acc:1310028]
ENSRNOG00000051237	45.5839	0.814442	0.231514	3.51789	0.000434988	0.00117515	ENSRNOG00000051237	Marf1-ps1	meiosis regulator and mRNA stability factor 1, pseudogene 1 [Source:RGD Symbol;Acc:1597141]
ENSRNOG00000069178	21.7692	1.34833	0.380732	3.54141	0.000397993	0.00108205	ENSRNOG00000069178
ENSRNOG00000068100	231.881	-0.277113	0.107198	-2.58506	0.00973614	0.0196769	ENSRNOG00000068100	Zfp235	zinc finger protein 235 [Source:RGD Symbol;Acc:150345771]
ENSRNOG00000020884	26.8082	0.150695	0.290034	0.519576	0.603359	0.683735	ENSRNOG00000020884	Cd6	Cd6 molecule [Source:RGD Symbol;Acc:2312]
ENSRNOG00000024376	450.7	-0.246426	0.109379	-2.25296	0.0242616	0.044179	ENSRNOG00000024376	Zfp111	zinc finger protein 111 [Source:RGD Symbol;Acc:620595]
ENSRNOG00000066415	134.949	1.20386	0.161884	7.43661	1.03306e-13	1.07303e-12	ENSRNOG00000066415
ENSRNOG00000064905	37.0576	1.3381	0.284375	4.7054	2.53374e-06	1.00444e-05	ENSRNOG00000064905
ENSRNOG00000063144	216.937	-0.0726154	0.123995	-0.585632	0.558123	0.644083	ENSRNOG00000063144	Znf235-ps1	zinc finger protein 235, pseudogene 1 [Source:RGD Symbol;Acc:7498933]
ENSRNOG00000020020	1374.37	-0.240935	0.0584401	-4.12277	3.74347e-05	0.000122817	ENSRNOG00000020020	Wbp1l	WW domain binding protein 1-like [Source:RGD Symbol;Acc:1305793]
ENSRNOG00000071050	31.2587	0.654745	0.310875	2.10613	0.0351928	0.0613634	ENSRNOG00000071050	LOC102555644	zinc finger protein 182-like [Source:RGD Symbol;Acc:7699783]
ENSRNOG00000052945	1277.41	-0.444041	0.0658536	-6.74285	1.55308e-11	1.2585e-10	ENSRNOG00000052945	Pepd	peptidase D [Source:RGD Symbol;Acc:1594571]
ENSRNOG00000046439	682.171	-0.163586	0.0780882	-2.09488	0.0361812	0.0629056	ENSRNOG00000046439	Vps37c	VPS37C subunit of ESCRT-I [Source:RGD Symbol;Acc:11384366]
ENSRNOG00000010967	1884.62	0.278857	0.0539877	5.16519	2.40194e-07	1.10201e-06	ENSRNOG00000010967	Cdc37l1	cell division cycle 37-like 1 [Source:RGD Symbol;Acc:1309295]
ENSRNOG00000062629	249.413	1.07462	0.139876	7.68265	1.55836e-14	1.7931e-13	ENSRNOG00000062629	Zfp420-ps2	zinc finger protein 420, pseudogene 2 [Source:RGD Symbol;Acc:7577345]
ENSRNOG00000016218	3890.03	0.0938706	0.0574986	1.63257	0.102559	0.156216	ENSRNOG00000016218	Gtf3c1	general transcription factor IIIC subunit 1 [Source:RGD Symbol;Acc:621048]
ENSRNOG00000033146	195.98	-0.34799	0.115556	-3.01145	0.00260003	0.00600622	ENSRNOG00000033146	LOC100360843	ribosomal protein S19-like [Source:RGD Symbol;Acc:2321315]
ENSRNOG00000017804	89.9796	-0.351151	0.1709	-2.05472	0.0399059	0.0684391	ENSRNOG00000017804	Septin1	septin 1 [Source:RGD Symbol;Acc:1307216]
ENSRNOG00000017299	1889.93	-0.0895536	0.0526399	-1.70125	0.0888964	0.137928	ENSRNOG00000017299	Phrf1	PHD and ring finger domains 1 [Source:RGD Symbol;Acc:708360]
ENSRNOG00000016274	278.059	-0.401625	0.0879482	-4.56662	4.95661e-06	1.88318e-05	ENSRNOG00000016274	Zfp580	zinc finger protein 580 [Source:RGD Symbol;Acc:1306892]
ENSRNOG00000016023	542.388	0.068149	0.0765913	0.889775	0.373587	0.462911	ENSRNOG00000016023	Kank1	KN motif and ankyrin repeat domains 1 [Source:RGD Symbol;Acc:1307714]
ENSRNOG00000016829	191.856	-0.362696	0.122747	-2.95482	0.00312849	0.00711047	ENSRNOG00000016829	Isoc2a	isochorismatase domain containing 2b [Source:RGD Symbol;Acc:1309062]
ENSRNOG00000013165	647.842	-0.324857	0.0675303	-4.81054	1.50525e-06	6.17452e-06	ENSRNOG00000013165	Bet1l	Bet1 golgi vesicular membrane trafficking protein-like [Source:RGD Symbol;Acc:71051]
ENSRNOG00000016877	188.83	0.62997	0.166628	3.78069	0.000156396	0.000457867	ENSRNOG00000016877	Shisa7	shisa family member 7 [Source:RGD Symbol;Acc:1583944]
ENSRNOG00000015442	2920.83	-0.0551242	0.0479121	-1.15053	0.249926	0.332464	ENSRNOG00000015442	Sfxn3	sideroflexin 3 [Source:RGD Symbol;Acc:620716]
ENSRNOG00000017810	207.851	-0.115113	0.10175	-1.13134	0.257913	0.34115	ENSRNOG00000017810	Uros	uroporphyrinogen III synthase [Source:RGD Symbol;Acc:1310396]
ENSRNOG00000015491	412.007	-0.200663	0.0785985	-2.55301	0.0106797	0.0213696	ENSRNOG00000015491	Rcl1	RNA terminal phosphate cyclase-like 1 [Source:RGD Symbol;Acc:1305320]
ENSRNOG00000050348	346.929	-0.339433	0.0982269	-3.4556	0.000549071	0.0014584	ENSRNOG00000050348	Isoc2a	isochorismatase domain containing 2A [Source:RGD Symbol;Acc:1592677]
ENSRNOG00000017127	3313.87	-0.436194	0.0491406	-8.87644	6.90357e-19	1.25308e-17	ENSRNOG00000017127	Rpl28	ribosomal protein L28 [Source:RGD Symbol;Acc:621193]
ENSRNOG00000017837	707.845	-0.308337	0.069395	-4.44321	8.86271e-06	3.23274e-05	ENSRNOG00000017837	Znf48	zinc finger protein 48 [Source:RGD Symbol;Acc:9115869]
ENSRNOG00000053828	2711.94	-0.178821	0.0570299	-3.13557	0.00171523	0.00411139	ENSRNOG00000053828	Ppp1r12c	protein phosphatase 1, regulatory subunit 12C [Source:RGD Symbol;Acc:1584883]
ENSRNOG00000052506	727.256	-0.194215	0.0710586	-2.73317	0.00627285	0.0133209	ENSRNOG00000052506	Ak3	adenylate kinase 3 [Source:RGD Symbol;Acc:619885]
ENSRNOG00000025061	360.477	-0.192049	0.0918728	-2.09038	0.0365839	0.0635069	ENSRNOG00000025061	Spindoc	spindlin interactor and repressor of chromatin binding [Source:RGD Symbol;Acc:1308106]
ENSRNOG00000013813	240.699	-0.75992	0.145852	-5.2102	1.88634e-07	8.81042e-07	ENSRNOG00000013813	Ubtd1	ubiquitin domain containing 1 [Source:RGD Symbol;Acc:1308172]
ENSRNOG00000012156	380.039	-0.0823301	0.0879821	-0.93576	0.349397	0.438285	ENSRNOG00000012156	Ostf1	osteoclast stimulating factor 1 [Source:RGD Symbol;Acc:628849]
ENSRNOG00000020723	1158.01	0.580572	0.0787346	7.37379	1.6584e-13	1.67933e-12	ENSRNOG00000020723	Pten	phosphatase and tensin homolog [Source:RGD Symbol;Acc:61995]
ENSRNOG00000020857	3077.16	0.125834	0.0453077	2.77733	0.00548071	0.0117922	ENSRNOG00000020857	Ppfia1	PTPRF interacting protein alpha 1 [Source:RGD Symbol;Acc:1309009]
ENSRNOG00000012665	239.148	-0.172403	0.107149	-1.609	0.107616	0.162662	ENSRNOG00000012665	Nmrk1	nicotinamide riboside kinase 1 [Source:RGD Symbol;Acc:1564687]
ENSRNOG00000018708	2095.36	-0.395878	0.0584071	-6.77791	1.21927e-11	9.9859e-11	ENSRNOG00000018708	Ppp1ca	protein phosphatase 1 catalytic subunit alpha [Source:RGD Symbol;Acc:3375]
ENSRNOG00000038622	256.865	-0.406042	0.117848	-3.44549	0.000570034	0.00150939	ENSRNOG00000038622	Nat14	N-acetyltransferase 14 [Source:RGD Symbol;Acc:1565991]
ENSRNOG00000018561	720.312	-0.0399093	0.071802	-0.555824	0.578331	0.66136	ENSRNOG00000018561	Pprc1	PPARG related coactivator 1 [Source:RGD Symbol;Acc:1309688]
ENSRNOG00000067958	21.6634	-0.645729	0.355754	-1.8151	0.0695086	0.11122	ENSRNOG00000067958	Nat14	N-acetyltransferase 14 [Source:RGD Symbol;Acc:1565991]
ENSRNOG00000015156	73.702	-0.809974	0.227531	-3.55984	0.000371081	0.00101497	ENSRNOG00000015156	Gal	galanin and GMAP prepropeptide [Source:RGD Symbol;Acc:61954]
ENSRNOG00000016302	5213.22	-0.191939	0.0505807	-3.79471	0.000147814	0.000435288	ENSRNOG00000016302	Cnnm1	cyclin and CBS domain divalent metal cation transport mediator 1 [Source:RGD Symbol;Acc:1308728]
ENSRNOG00000056753	613.78	0.933924	0.0721202	12.9496	2.36332e-38	2.45127e-36	ENSRNOG00000056753	Hectd2	HECT domain E3 ubiquitin protein ligase 2 [Source:RGD Symbol;Acc:1305536]
ENSRNOG00000069605	150.555	-0.217549	0.14968	-1.45342	0.146106	0.211062	ENSRNOG00000069605	Leng9	leukocyte receptor cluster member 9 [Source:RGD Symbol;Acc:6488215]
ENSRNOG00000018729	459.747	0.0994382	0.0774838	1.28334	0.199372	0.274546	ENSRNOG00000018729	Rad9a	RAD9 checkpoint clamp component A [Source:RGD Symbol;Acc:2319938]
ENSRNOG00000018642	2987.25	0.883037	0.0931165	9.48314	2.4674e-21	5.74184e-20	ENSRNOG00000018642	Leng8	leukocyte receptor cluster member 8 [Source:RGD Symbol;Acc:1306180]
ENSRNOG00000018752	24.3761	0.789084	0.32386	2.4365	0.0148301	0.0285797	ENSRNOG00000018752	Clcf1	cardiotrophin-like cytokine factor 1 [Source:RGD Symbol;Acc:1303171]
ENSRNOG00000013256	1335.59	-0.331605	0.058948	-5.62538	1.85095e-08	1.0044e-07	ENSRNOG00000013256	Ric8a	RIC8 guanine nucleotide exchange factor A [Source:RGD Symbol;Acc:727957]
ENSRNOG00000018718	617.306	0.087578	0.0773651	1.13201	0.257631	0.340933	ENSRNOG00000018718	Rpp30	ribonuclease P/MRP subunit p30 [Source:RGD Symbol;Acc:1595116]
ENSRNOG00000061147	143.889	0.00266927	0.149913	0.0178055	0.985794	0.989894	ENSRNOG00000061147	Entrep1	endosomal transmembrane epsin interactor 1 [Source:RGD Symbol;Acc:1307524]
ENSRNOG00000018765	131.188	-0.225371	0.137718	-1.63646	0.101743	0.155124	ENSRNOG00000018765	Pold4	DNA polymerase delta 4, accessory subunit [Source:RGD Symbol;Acc:1308519]
ENSRNOG00000013828	953.152	-0.251167	0.0762351	-3.29464	0.000985489	0.0024827	ENSRNOG00000013828	Sirt3	sirtuin 3 [Source:RGD Symbol;Acc:1308374]
ENSRNOG00000013967	85.0338	0.217917	0.192861	1.12992	0.258511	0.341692	ENSRNOG00000013967	Blnk	B-cell linker [Source:RGD Symbol;Acc:1561933]
ENSRNOG00000028628	538.776	-0.267655	0.0718474	-3.72532	0.000195065	0.000562012	ENSRNOG00000028628	Znf865	zinc finger protein 865 [Source:RGD Symbol;Acc:6494165]
ENSRNOG00000018066	704.142	-0.479835	0.0853372	-5.62281	1.87872e-08	1.01804e-07	ENSRNOG00000018066	Bccip	BRCA2 and CDKN1A interacting protein [Source:RGD Symbol;Acc:1307362]
ENSRNOG00000048166	266.467	0.357503	0.0958273	3.7307	0.000190948	0.000551354	ENSRNOG00000048166	Arhgap19	Rho GTPase activating protein 19 [Source:RGD Symbol;Acc:1593044]
ENSRNOG00000014891	285.642	1.34031	0.121489	11.0324	2.66602e-28	1.22124e-26	ENSRNOG00000014891	Ptar1	protein prenyltransferase alpha subunit repeat containing 1 [Source:RGD Symbol;Acc:708369]
ENSRNOG00000026048	3534.01	0.0635134	0.0357454	1.77683	0.0755964	0.119657	ENSRNOG00000026048	Gbf1	golgi brefeldin A resistant guanine nucleotide exchange factor 1 [Source:RGD Symbol;Acc:1307160]
ENSRNOG00000016635	364.73	0.111824	0.115236	0.970388	0.331853	0.420235	ENSRNOG00000016635	Katnip	katanin interacting protein [Source:RGD Symbol;Acc:1595846]
ENSRNOG00000015932	201.578	-0.270681	0.110397	-2.45189	0.0142107	0.0275174	ENSRNOG00000015932	Plgrkt	plasminogen receptor with a C-terminal lysine [Source:RGD Symbol;Acc:1306839]
ENSRNOG00000025781	114.259	0.738839	0.144568	5.11066	3.21035e-07	1.44371e-06	ENSRNOG00000025781	Sec31b	SEC31 homolog B, COPII coat complex component [Source:RGD Symbol;Acc:1598329]
ENSRNOG00000018119	1046.26	-0.166204	0.0531259	-3.12849	0.00175705	0.00420262	ENSRNOG00000018119	Dhx32	DEAH-box helicase 32 (putative) [Source:RGD Symbol;Acc:1311740]
ENSRNOG00000016112	154.239	0.133545	0.210615	0.634071	0.526034	0.614278	ENSRNOG00000016112	Cd274	CD274 molecule [Source:RGD Symbol;Acc:1566211]
ENSRNOG00000011287	683.823	-0.125388	0.0896432	-1.39874	0.16189	0.230223	ENSRNOG00000011287	Minpp1	multiple inositol-polyphosphate phosphatase 1 [Source:RGD Symbol;Acc:3089]
ENSRNOG00000014109	1724.59	-0.298279	0.051602	-5.78037	7.45371e-09	4.25453e-08	ENSRNOG00000014109	Psmd13	proteasome 26S subunit, non-ATPase 13 [Source:RGD Symbol;Acc:1305236]
ENSRNOG00000016456	2477.26	-0.058689	0.0845855	-0.693843	0.487781	0.577388	ENSRNOG00000016456	Il33	interleukin 33 [Source:RGD Symbol;Acc:1311155]
ENSRNOG00000013519	61.386	0.0332635	0.204598	0.16258	0.870849	0.904485	ENSRNOG00000013519	Tll2	tolloid-like 2 [Source:RGD Symbol;Acc:1559756]
ENSRNOG00000042826	111.535	0.959263	0.191243	5.01593	5.27782e-07	2.30355e-06	ENSRNOG00000042826	Zfp52	zinc finger protein 52 [Source:RGD Symbol;Acc:1359149]
ENSRNOG00000063577	386.003	0.508703	0.153928	3.30481	0.000950403	0.00239972	ENSRNOG00000063577	LOC102550851	zinc finger protein 420-like [Source:RGD Symbol;Acc:7563768]
ENSRNOG00000043341	187.103	0.461736	0.138644	3.33036	0.000867326	0.00220645	ENSRNOG00000043341	Zfp51l1	zinc finger protein 51 like 1 [Source:RGD Symbol;Acc:1560046]
ENSRNOG00000042547	158.169	-0.590614	0.349916	-1.68787	0.0914353	0.141293	ENSRNOG00000042547	AABR07001902.1
ENSRNOG00000017349	2154.89	-0.193426	0.0532111	-3.63507	0.000277902	0.000777538	ENSRNOG00000017349	Tbc1d10b	TBC1 domain family, member 10b [Source:RGD Symbol;Acc:1309191]
ENSRNOG00000020567	834.327	-0.36481	0.0636157	-5.73458	9.77517e-09	5.49111e-08	ENSRNOG00000020567	Fibp	FGF1 intracellular binding protein [Source:RGD Symbol;Acc:628715]
ENSRNOG00000024602	245.753	0.184345	0.108557	1.69814	0.0894809	0.138764	ENSRNOG00000024602	Plekha7	pleckstrin homology domain containing A7 [Source:RGD Symbol;Acc:1598216]
ENSRNOG00000017751	6142.94	0.00507058	0.0426391	0.118918	0.90534	0.929964	ENSRNOG00000017751	Arl6ip1	ADP-ribosylation factor like GTPase 6 interacting protein 1 [Source:RGD Symbol;Acc:735205]
ENSRNOG00000036585	64.0099	-0.154517	0.246015	-0.628081	0.529951	0.617758	ENSRNOG00000036585	Cfap43	cilia and flagella associated protein 43 [Source:RGD Symbol;Acc:1560545]
ENSRNOG00000020455	84.1395	-0.654769	0.177514	-3.68856	0.00022553	0.000641637	ENSRNOG00000020455	Cst6	cystatin E/M [Source:RGD Symbol;Acc:628799]
ENSRNOG00000018384	258.968	0.157154	0.100226	1.568	0.116881	0.174883	ENSRNOG00000018384	Adam12	ADAM metallopeptidase domain 12 [Source:RGD Symbol;Acc:1583652]
ENSRNOG00000017645	125.055	-0.0567666	0.147883	-0.383861	0.701081	0.766651	ENSRNOG00000017645	Myl11	myosin light chain 11 [Source:RGD Symbol;Acc:3141]
ENSRNOG00000019721	3978.77	-0.29267	0.0652398	-4.48607	7.25491e-06	2.67858e-05	ENSRNOG00000019721	Ypel3	yippee-like 3 [Source:RGD Symbol;Acc:1564579]
ENSRNOG00000046602	111.577	1.55148	0.240035	6.46357	1.02258e-10	7.52607e-10	ENSRNOG00000046602	Muc2	mucin 2, oligomeric mucus/gel-forming [Source:RGD Symbol;Acc:3123]
ENSRNOG00000020460	1717.42	-0.551433	0.0490485	-11.2426	2.51821e-29	1.27856e-27	ENSRNOG00000020460	Banf1	BAF nuclear assembly factor 1 [Source:RGD Symbol;Acc:620662]
ENSRNOG00000027491	1273.68	0.270572	0.0744911	3.63227	0.000280944	0.000785442	ENSRNOG00000027491	Vldlr	very low density lipoprotein receptor [Source:RGD Symbol;Acc:3963]
ENSRNOG00000020047	1004.79	-0.103736	0.0820346	-1.26454	0.206037	0.282518	ENSRNOG00000020047	Tut1	terminal uridylyl transferase 1, U6 snRNA-specific [Source:RGD Symbol;Acc:1561043]
ENSRNOG00000053450	686.396	-0.19951	0.0679437	-2.9364	0.00332051	0.00750811	ENSRNOG00000053450	Myadm	myeloid-associated differentiation marker [Source:RGD Symbol;Acc:727835]
ENSRNOG00000020813	1939.98	0.166824	0.0776178	2.14929	0.0316111	0.0558221	ENSRNOG00000020813	Ltbp3	latent transforming growth factor beta binding protein 3 [Source:RGD Symbol;Acc:62057]
ENSRNOG00000020463	774.638	-0.308837	0.064672	-4.77544	1.79318e-06	7.26936e-06	ENSRNOG00000020463	Eif1ad	eukaryotic translation initiation factor 1A domain containing [Source:RGD Symbol;Acc:1304686]
ENSRNOG00000017822	3720.49	0.133489	0.0507148	2.63216	0.00848449	0.017409	ENSRNOG00000017822	Oga	O-GlcNAcase [Source:RGD Symbol;Acc:621077]
ENSRNOG00000056257	5780.21	-0.218416	0.0441332	-4.94902	7.45876e-07	3.18181e-06	ENSRNOG00000056257	Cacng7	calcium voltage-gated channel auxiliary subunit gamma 7 [Source:RGD Symbol;Acc:628807]
ENSRNOG00000058842	20723.1	-0.303497	0.0427797	-7.09443	1.29888e-12	1.19148e-11	ENSRNOG00000058842	Sptbn2	spectrin, beta, non-erythrocytic 2 [Source:RGD Symbol;Acc:3751]
ENSRNOG00000023668	1732.73	-0.179943	0.0534801	-3.36467	0.000766359	0.0019731	ENSRNOG00000023668	Scyl1	SCY1 like pseudokinase 1 [Source:RGD Symbol;Acc:1307330]
ENSRNOG00000046455	35.9935	0.823075	0.252784	3.25604	0.00112978	0.00281109	ENSRNOG00000046455	Zik1	zinc finger protein interacting with K protein 1 [Source:RGD Symbol;Acc:1590949]
ENSRNOG00000051570	25.529	1.50053	0.358114	4.19008	2.78854e-05	9.32791e-05	ENSRNOG00000051570	Znf845l-ps1	zinc finger protein 845 like, pseudogene 1 [Source:RGD Symbol;Acc:7732425]
ENSRNOG00000016117	136.652	0.324942	0.140075	2.31978	0.020353	0.0376924	ENSRNOG00000016117	Myof	myoferlin [Source:RGD Symbol;Acc:1564216]
ENSRNOG00000050994	2798.29	-0.155207	0.0417888	-3.71409	0.000203938	0.00058456	ENSRNOG00000050994	Cttn	cortactin [Source:RGD Symbol;Acc:619839]
ENSRNOG00000055229	5050.89	0.685528	0.0405925	16.888	5.51009e-64	3.47878e-61	ENSRNOG00000055229	Lnpep	leucyl and cystinyl aminopeptidase [Source:RGD Symbol;Acc:621752]
ENSRNOG00000020475	1664.33	-0.498231	0.0486523	-10.2406	1.30376e-24	4.18033e-23	ENSRNOG00000020475	Sart1	spliceosome associated factor 1, recruiter of U4/U6.U5 tri-snRNP [Source:RGD Symbol;Acc:61930]
ENSRNOG00000042620	143.368	-0.159058	0.134908	-1.17901	0.238394	0.319317	ENSRNOG00000042620	Marveld1	MARVEL domain containing 1 [Source:RGD Symbol;Acc:1309811]
ENSRNOG00000014650	2238.93	-0.17058	0.0495457	-3.44288	0.000575562	0.00152347	ENSRNOG00000014650	Sema4g	semaphorin 4G [Source:RGD Symbol;Acc:1310436]
ENSRNOG00000067618	20.4067	-0.0234597	0.372896	-0.0629121	0.949837	0.963572	ENSRNOG00000067618
ENSRNOG00000014890	673.003	-0.477972	0.0751991	-6.35609	2.06956e-10	1.46595e-09	ENSRNOG00000014890	Mrpl43	mitochondrial ribosomal protein L43 [Source:RGD Symbol;Acc:1307593]
ENSRNOG00000014041	316.544	0.160853	0.108624	1.48082	0.138656	0.202049	ENSRNOG00000014041	Cep78	centrosomal protein 78 [Source:RGD Symbol;Acc:620464]
ENSRNOG00000021150	539.744	-0.278808	0.10011	-2.78501	0.00535258	0.0115507	ENSRNOG00000021150	Plcb3	phospholipase C beta 3 [Source:RGD Symbol;Acc:61993]
ENSRNOG00000018944	699.286	0.190469	0.0914616	2.0825	0.0372968	0.0646131	ENSRNOG00000018944	Pank1	pantothenate kinase 1 [Source:RGD Symbol;Acc:1304677]
ENSRNOG00000021005	652.281	-0.089008	0.0716246	-1.2427	0.213978	0.291972	ENSRNOG00000021005	Mrpl16	mitochondrial ribosomal protein L16 [Source:RGD Symbol;Acc:735195]
ENSRNOG00000014935	849.842	-0.333101	0.070391	-4.73216	2.22143e-06	8.88632e-06	ENSRNOG00000014935	Twnk	twinkle mtDNA helicase [Source:RGD Symbol;Acc:1307884]
ENSRNOG00000016833	1511.43	0.161447	0.0528093	3.05718	0.00223431	0.00522371	ENSRNOG00000016833	Ide	insulin degrading enzyme [Source:RGD Symbol;Acc:2861]
ENSRNOG00000054371	10276.9	-0.376624	0.0675069	-5.57904	2.41856e-08	1.28833e-07	ENSRNOG00000054371	Prkcg	protein kinase C, gamma [Source:RGD Symbol;Acc:3397]
ENSRNOG00000056038	276.227	-0.362005	0.107938	-3.35382	0.00079705	0.00204451	ENSRNOG00000056038	Ehbp1l1	EH domain binding protein 1-like 1 [Source:RGD Symbol;Acc:1563823]
ENSRNOG00000058909	4091.9	-0.549652	0.0532094	-10.33	5.1574e-25	1.71374e-23	ENSRNOG00000058909	Rps9	ribosomal protein S9 [Source:RGD Symbol;Acc:619889]
ENSRNOG00000059572	1188.57	-0.373428	0.0653695	-5.71256	1.11286e-08	6.22014e-08	ENSRNOG00000059572	Tsen34	tRNA splicing endonuclease subunit 34 [Source:RGD Symbol;Acc:1359564]
ENSRNOG00000052600	1283.1	-0.199507	0.0538696	-3.70352	0.000212631	0.000607319	ENSRNOG00000052600	Mboat7	membrane bound O-acyltransferase domain containing 7 [Source:RGD Symbol;Acc:1306945]
ENSRNOG00000061893	189.593	-0.22446	0.121721	-1.84406	0.0651747	0.105252	ENSRNOG00000061893	Leng1	leukocyte receptor cluster member 1 [Source:RGD Symbol;Acc:1307933]
ENSRNOG00000053728	229.404	0.162858	0.183676	0.88666	0.375262	0.46455	ENSRNOG00000053728	Prkg1	protein kinase cGMP-dependent 1 [Source:RGD Symbol;Acc:1587390]
ENSRNOG00000053234	1141.7	-0.0185185	0.0722746	-0.256225	0.797777	0.845833	ENSRNOG00000053234	Cnot3	CCR4-NOT transcription complex, subunit 3 [Source:RGD Symbol;Acc:1304771]
ENSRNOG00000025523	643.618	-0.126195	0.0639365	-1.97375	0.0484102	0.0811644	ENSRNOG00000025523	Armh3	armadillo-like helical domain containing 3 [Source:RGD Symbol;Acc:9299787]
ENSRNOG00000061039	792.712	-0.259079	0.0706221	-3.66853	0.000243951	0.000688918	ENSRNOG00000061039	Prpf31	pre-mRNA processing factor 31 [Source:RGD Symbol;Acc:1305832]
ENSRNOG00000020975	1504.16	-0.365752	0.061546	-5.94275	2.80279e-09	1.70219e-08	ENSRNOG00000020975	Mrpl49	mitochondrial ribosomal protein L49 [Source:RGD Symbol;Acc:1309920]
ENSRNOG00000056098	338.633	-0.327387	0.0967849	-3.38263	0.000717956	0.00186268	ENSRNOG00000056098	Tfpt	TCF3 fusion partner [Source:RGD Symbol;Acc:620839]
ENSRNOG00000060293	145.122	0.642065	0.184498	3.48006	0.000501304	0.00134109	ENSRNOG00000060293	Ndufa3	NADH:ubiquinone oxidoreductase subunit A3 [Source:RGD Symbol;Acc:1588687]
ENSRNOG00000014816	676.098	0.484358	0.0829533	5.83892	5.2539e-09	3.07753e-08	ENSRNOG00000014816	Slc1a1	solute carrier family 1 member 1 [Source:RGD Symbol;Acc:3696]
ENSRNOG00000017406	2693.68	0.0323957	0.0616925	0.525116	0.599502	0.680201	ENSRNOG00000017406	Atrnl1	attractin like 1 [Source:RGD Symbol;Acc:1563485]
ENSRNOG00000025520	43.6704	-0.309637	0.230396	-1.34393	0.178971	0.250153	ENSRNOG00000025520	Lbx1	ladybird homeobox 1 [Source:RGD Symbol;Acc:1564197]
ENSRNOG00000063395	139.22	0.915469	0.535563	1.70936	0.0873847	0.135858	ENSRNOG00000063395
ENSRNOG00000022273	1086.5	0.244767	0.055218	4.43274	9.30425e-06	3.38105e-05	ENSRNOG00000022273	Rfk	riboflavin kinase [Source:RGD Symbol;Acc:1549748]
ENSRNOG00000057848	78.1516	-0.00507575	0.203336	-0.0249624	0.980085	0.985856	ENSRNOG00000057848	Cacng8	calcium voltage-gated channel auxiliary subunit gamma 8 [Source:RGD Symbol;Acc:628808]
ENSRNOG00000034078	3479.73	-0.0238313	0.0744834	-0.319955	0.749003	0.806605	ENSRNOG00000034078	Mxi1	MAX interactor 1, dimerization protein [Source:RGD Symbol;Acc:3128]
ENSRNOG00000013552	566.262	-0.221121	0.137538	-1.60771	0.107898	0.163037	ENSRNOG00000013552	Scd	stearoyl-CoA desaturase [Source:RGD Symbol;Acc:621176]
ENSRNOG00000062686	1593.18	0.140791	0.202131	0.696531	0.486096	0.575797	ENSRNOG00000062686	Gcnt1	glucosaminyl (N-acetyl) transferase 1 [Source:RGD Symbol;Acc:621370]
ENSRNOG00000017321	110.913	0.159456	0.152004	1.04903	0.294166	0.380001	ENSRNOG00000017321	Trub1	TruB pseudouridine synthase family member 1 [Source:RGD Symbol;Acc:1308502]
ENSRNOG00000055093	767.279	0.308712	0.0695264	4.44022	8.98673e-06	3.27223e-05	ENSRNOG00000055093	Cep43	centrosomal protein 43 [Source:RGD Symbol;Acc:1583370]
ENSRNOG00000012258	168.309	-0.344931	0.139014	-2.48128	0.0130913	0.0256094	ENSRNOG00000012258	Rras2	RAS related 2 [Source:RGD Symbol;Acc:1310793]
ENSRNOG00000067119	62.186	0.344781	0.223633	1.54173	0.123139	0.18287	ENSRNOG00000067119	Smim17	small integral membrane protein 17 [Source:RGD Symbol;Acc:1559613]
ENSRNOG00000020950	1529.6	0.0371798	0.0560491	0.663343	0.507111	0.596111	ENSRNOG00000020950	Syvn1	synoviolin 1 [Source:RGD Symbol;Acc:1310488]
ENSRNOG00000013413	89.9195	0.391878	0.201134	1.94834	0.0513743	0.0854434	ENSRNOG00000013413	Rorb	RAR-related orphan receptor B [Source:RGD Symbol;Acc:1306778]
ENSRNOG00000070422	1515.76	0.324753	0.0556322	5.8375	5.29897e-09	3.10072e-08	ENSRNOG00000070422	Cstf2t	cleavage stimulation factor subunit 2, tau variant [Source:RGD Symbol;Acc:1310026]
ENSRNOG00000015124	2118.8	0.085518	0.0551299	1.55121	0.120852	0.180007	ENSRNOG00000015124	Gpam	glycerol-3-phosphate acyltransferase, mitochondrial [Source:RGD Symbol;Acc:61847]
ENSRNOG00000030210	32.8754	-0.0424089	0.243402	-0.174234	0.861681	0.897281	ENSRNOG00000030210	Fndc1	fibronectin type III domain containing 1 [Source:RGD Symbol;Acc:1310640]
ENSRNOG00000018494	911.605	-0.138192	0.0757596	-1.82409	0.0681389	0.109331	ENSRNOG00000018494	Ppp1r3c	protein phosphatase 1, regulatory subunit 3C [Source:RGD Symbol;Acc:1309132]
ENSRNOG00000024239	587.304	-0.400366	0.0773603	-5.17534	2.27495e-07	1.04739e-06	ENSRNOG00000024239	Fam89b	family with sequence similarity 89, member B [Source:RGD Symbol;Acc:1311544]
ENSRNOG00000021007	580.209	-0.260163	0.0762525	-3.41187	0.000645193	0.0016893	ENSRNOG00000021007	Snx15	sorting nexin 15 [Source:RGD Symbol;Acc:1305803]
ENSRNOG00000012736	446.14	-0.328698	0.0923618	-3.55881	0.000372546	0.00101865	ENSRNOG00000012736	Znrd2	zinc ribbon domain containing 2 [Source:RGD Symbol;Acc:1593467]
ENSRNOG00000015137	123.256	-0.0202154	0.151073	-0.133812	0.893551	0.920819	ENSRNOG00000015137	Spata6l	spermatogenesis associated 6-like [Source:RGD Symbol;Acc:1310039]
ENSRNOG00000010230	1242.45	0.330622	0.0525651	6.28976	3.17965e-10	2.19437e-09	ENSRNOG00000010230	Dennd10	DENN domain containing 10 [Source:RGD Symbol;Acc:1308326]
ENSRNOG00000058003	1721.79	-0.493177	0.0860126	-5.73378	9.82175e-09	5.51514e-08	ENSRNOG00000058003	Spon1	spondin 1 [Source:RGD Symbol;Acc:619918]
ENSRNOG00000024712	111.355	0.428334	0.145518	2.94352	0.00324501	0.00735688	ENSRNOG00000024712	Insc	INSC, spindle orientation adaptor protein [Source:RGD Symbol;Acc:1311379]
ENSRNOG00000019048	5133.35	-0.0267264	0.0461173	-0.579531	0.562231	0.647333	ENSRNOG00000019048	Sod2	superoxide dismutase 2 [Source:RGD Symbol;Acc:3732]
ENSRNOG00000008890	208.433	0.0554941	0.10912	0.508561	0.61106	0.690737	ENSRNOG00000008890	Slc18a2	solute carrier family 18 member A2 [Source:RGD Symbol;Acc:3694]
ENSRNOG00000019091	1631.59	0.178284	0.0553059	3.2236	0.00126589	0.00311455	ENSRNOG00000019091	Wtap	WT1 associated protein [Source:RGD Symbol;Acc:1563824]
ENSRNOG00000019534	7495.85	-0.265979	0.0461744	-5.76031	8.39582e-09	4.75305e-08	ENSRNOG00000019534	Ap2a2	adaptor related protein complex 2 subunit alpha 2 [Source:RGD Symbol;Acc:71015]
ENSRNOG00000032554	73.3091	0.461999	0.234414	1.97087	0.0487389	0.0816589	ENSRNOG00000032554	Scd4	stearoyl-coenzyme A desaturase 4 [Source:RGD Symbol;Acc:1563648]
ENSRNOG00000009460	2313.56	0.276655	0.0504464	5.48413	4.15509e-08	2.1275e-07	ENSRNOG00000009460	Pdzd8	PDZ domain containing 8 [Source:RGD Symbol;Acc:1308622]
ENSRNOG00000014253	130.045	-0.0896548	0.141337	-0.634333	0.525864	0.614128	ENSRNOG00000014253	Pax2	paired box 2 [Source:RGD Symbol;Acc:1305568]
ENSRNOG00000021010	937.857	-0.367284	0.0680454	-5.39764	6.75244e-08	3.36371e-07	ENSRNOG00000021010	Arl2	ADP-ribosylation factor like GTPase 2 [Source:RGD Symbol;Acc:69326]
ENSRNOG00000019189	826.228	-0.325621	0.0665567	-4.89238	9.96226e-07	4.17857e-06	ENSRNOG00000019189	Acat2	acetyl-CoA acetyltransferase 2 [Source:RGD Symbol;Acc:1359366]
ENSRNOG00000018532	181.212	0.817976	0.14186	5.76606	8.11445e-09	4.60094e-08	ENSRNOG00000018532	Pcgf5	polycomb group ring finger 5 [Source:RGD Symbol;Acc:1583513]
ENSRNOG00000009812	1670.18	0.333708	0.0634471	5.25963	1.44344e-07	6.84304e-07	ENSRNOG00000009812	Sbf2	SET binding factor 2 [Source:RGD Symbol;Acc:1588657]
ENSRNOG00000010958	1440.51	-0.0883743	0.0571835	-1.54545	0.122237	0.181735	ENSRNOG00000010958	Prdx3	peroxiredoxin 3 [Source:RGD Symbol;Acc:620040]
ENSRNOG00000013975	67.242	-0.490949	0.185488	-2.64679	0.00812587	0.016737	ENSRNOG00000013975	Acat2l1	acetyl-CoA acetyltransferase 2-like 1 [Source:RGD Symbol;Acc:1562948]
ENSRNOG00000062728	315.387	0.269596	0.104393	2.58252	0.00980821	0.019795	ENSRNOG00000062728	Tctn3	tectonic family member 3 [Source:RGD Symbol;Acc:1305166]
ENSRNOG00000018704	3098.99	-0.0462193	0.0467905	-0.987793	0.323254	0.410887	ENSRNOG00000018704	Nolc1	nucleolar and coiled-body phosphoprotein 1 [Source:RGD Symbol;Acc:621578]
ENSRNOG00000062573	1336.23	-0.156812	0.054107	-2.89819	0.00375325	0.00839638	ENSRNOG00000062573	Cd151	CD151 molecule (Raph blood group) [Source:RGD Symbol;Acc:621290]
ENSRNOG00000014160	3449.91	-0.267044	0.0516554	-5.16973	2.34428e-07	1.0776e-06	ENSRNOG00000014160	Tcp1	t-complex 1 [Source:RGD Symbol;Acc:3832]
ENSRNOG00000020892	2140.36	-0.0268476	0.0565432	-0.474815	0.634919	0.710954	ENSRNOG00000020892	Dpf2	double PHD fingers 2 [Source:RGD Symbol;Acc:1311699]
ENSRNOG00000014582	643.261	-0.492679	0.0804052	-6.12746	8.92943e-10	5.78084e-09	ENSRNOG00000014582	Mrpl18	mitochondrial ribosomal protein L18 [Source:RGD Symbol;Acc:1306387]
ENSRNOG00000013817	29.3508	0.0854571	0.261685	0.326565	0.743997	0.802703	ENSRNOG00000013817	Wnt8b	Wnt family member 8B [Source:RGD Symbol;Acc:1307644]
ENSRNOG00000048562	430.617	-0.591463	0.109299	-5.41143	6.25241e-08	3.12857e-07	ENSRNOG00000048562	AC109542.1
ENSRNOG00000023140	71.6376	0.188669	0.195417	0.965468	0.33431	0.422794	ENSRNOG00000023140	Pnldc1	PARN like ribonuclease domain containing exonuclease 1 [Source:RGD Symbol;Acc:1308678]
ENSRNOG00000051680	3090.98	0.142315	0.0420386	3.38534	0.000710902	0.00184768	ENSRNOG00000051680	Ccdc186	coiled-coil domain containing 186 [Source:RGD Symbol;Acc:1307158]
ENSRNOG00000029810	1278.54	-0.48135	0.110397	-4.36016	1.29967e-05	4.60531e-05	ENSRNOG00000029810	Tspan4	tetraspanin 4 [Source:RGD Symbol;Acc:1305810]
ENSRNOG00000061215	293.975	0.0824885	0.153892	0.536017	0.591947	0.673905	ENSRNOG00000061215	Crym	crystallin, mu [Source:RGD Symbol;Acc:620943]
ENSRNOG00000019103	303.671	0.0348591	0.0905403	0.385012	0.700228	0.766033	ENSRNOG00000019103	Cln3	CLN3 lysosomal/endosomal transmembrane protein, battenin [Source:RGD Symbol;Acc:1359537]
ENSRNOG00000025793	1182.33	0.72271	0.0848385	8.51865	1.61419e-17	2.55612e-16	ENSRNOG00000025793	Usp31	ubiquitin specific peptidase 31 [Source:RGD Symbol;Acc:1308183]
ENSRNOG00000020025	376.747	0.110508	0.0843389	1.31028	0.190101	0.263403	ENSRNOG00000020025	Slc29a2	solute carrier family 29 member 2 [Source:RGD Symbol;Acc:69296]
ENSRNOG00000010427	3230.7	0.444779	0.0576529	7.71477	1.21199e-14	1.40795e-13	ENSRNOG00000010427	Ipo7	importin 7 [Source:RGD Symbol;Acc:1310849]
ENSRNOG00000027770	6481.67	0.179736	0.0670877	2.67911	0.0073817	0.0153457	ENSRNOG00000027770	Trpm3	transient receptor potential cation channel, subfamily M, member 3 [Source:RGD Symbol;Acc:1304888]
ENSRNOG00000017403	32.8307	-0.339654	0.272507	-1.2464	0.212617	0.290497	ENSRNOG00000017403	Apobr	apolipoprotein B receptor [Source:RGD Symbol;Acc:1565169]
ENSRNOG00000017976	405.545	0.0320206	0.0814755	0.393009	0.694313	0.760685	ENSRNOG00000017976	Slco2b1	solute carrier organic anion transporter family, member 2b1 [Source:RGD Symbol;Acc:621391]
ENSRNOG00000036601	590.701	0.0273068	0.0815253	0.334949	0.737664	0.797648	ENSRNOG00000036601	Exoc6	exocyst complex component 6 [Source:RGD Symbol;Acc:3653]
ENSRNOG00000015516	258.935	0.106103	0.0922405	1.15028	0.250027	0.332507	ENSRNOG00000015516	Zng1a	Zn regulated GTPase metalloprotein activator 1A [Source:RGD Symbol;Acc:708495]
ENSRNOG00000018262	785.922	0.138959	0.0626343	2.21857	0.0265157	0.0477947	ENSRNOG00000018262	Ampd3	adenosine monophosphate deaminase 3 [Source:RGD Symbol;Acc:2111]
ENSRNOG00000029501	78.3341	-0.0209545	0.20341	-0.103016	0.91795	0.939694	ENSRNOG00000029501	Hoga1	4-hydroxy-2-oxoglutarate aldolase 1 [Source:RGD Symbol;Acc:1310475]
ENSRNOG00000017158	21759.9	0.175531	0.0331975	5.28748	1.24014e-07	5.94131e-07	ENSRNOG00000017158	Eif4g2	eukaryotic translation initiation factor 4, gamma 2 [Source:RGD Symbol;Acc:1305294]
ENSRNOG00000018468	2028.02	-0.0244425	0.0530134	-0.461064	0.644753	0.719603	ENSRNOG00000018468	Ldb1	LIM domain binding 1 [Source:RGD Symbol;Acc:1310359]
ENSRNOG00000047386	11202.9	1.06652	0.0711712	14.9853	9.15514e-51	2.46188e-48	ENSRNOG00000047386	Smg1	SMG1, nonsense mediated mRNA decay associated PI3K related kinase [Source:RGD Symbol;Acc:1563508]
ENSRNOG00000019372	3630.17	-0.0872656	0.0549443	-1.58826	0.112228	0.16872	ENSRNOG00000019372	Pc	pyruvate carboxylase [Source:RGD Symbol;Acc:3262]
ENSRNOG00000017977	2858.15	-0.222713	0.0623554	-3.57168	0.000354703	0.000974209	ENSRNOG00000017977	Smpd1	sphingomyelin phosphodiesterase 1 [Source:RGD Symbol;Acc:1549719]
ENSRNOG00000063613	1366.51	-0.0624756	0.0781391	-0.799543	0.423975	0.514374	ENSRNOG00000063613	Chid1	chitinase domain containing 1 [Source:RGD Symbol;Acc:1308955]
ENSRNOG00000017767	79.0655	-0.185362	0.189356	-0.978904	0.327627	0.415391	ENSRNOG00000017767	Irag1	inositol 1,4,5-triphosphate receptor associated 1 [Source:RGD Symbol;Acc:1309828]
ENSRNOG00000018020	11630.3	-0.20959	0.0466712	-4.49078	7.09617e-06	2.62531e-05	ENSRNOG00000018020	Apbb1	amyloid beta precursor protein binding family B member 1 [Source:RGD Symbol;Acc:2122]
ENSRNOG00000013176	1701.4	0.946381	0.0504887	18.7444	2.15102e-78	3.90437e-75	ENSRNOG00000013176	Far1	fatty acyl CoA reductase 1 [Source:RGD Symbol;Acc:1306647]
ENSRNOG00000009523	1699.32	0.416455	0.0599404	6.94783	3.70959e-12	3.21979e-11	ENSRNOG00000009523	Rab11fip2	RAB11 family interacting protein 2 [Source:RGD Symbol;Acc:1308538]
ENSRNOG00000018257	24.5611	0.495997	0.311434	1.59263	0.111244	0.167501	ENSRNOG00000018257	Hpx	hemopexin [Source:RGD Symbol;Acc:62040]
ENSRNOG00000016980	24.7206	-0.0771918	0.336477	-0.229412	0.818549	0.863191	ENSRNOG00000016980	Qprt	quinolinate phosphoribosyltransferase [Source:RGD Symbol;Acc:1310309]
ENSRNOG00000031211	27.6367	0.0847009	0.369742	0.229081	0.818806	0.863337	ENSRNOG00000031211	Acsm5	acyl-CoA synthetase medium-chain family member 5 [Source:RGD Symbol;Acc:1309578]
ENSRNOG00000015894	101.673	0.563964	0.171858	3.28156	0.00103234	0.00258949	ENSRNOG00000015894	Dock8	dedicator of cytokinesis 8 [Source:RGD Symbol;Acc:1561588]
ENSRNOG00000043225	116.367	-0.356306	0.152306	-2.33941	0.0193144	0.0360078	ENSRNOG00000043225	Zfp771	zinc finger protein 771 [Source:RGD Symbol;Acc:1305903]
ENSRNOG00000013744	104.756	-0.41568	0.156422	-2.65743	0.00787379	0.0162524	ENSRNOG00000013744	Akip1	A-kinase interacting protein 1 [Source:RGD Symbol;Acc:1306959]
ENSRNOG00000019356	410.156	-0.551678	0.121162	-4.55324	5.28247e-06	1.99446e-05	ENSRNOG00000019356	Lrfn4	leucine rich repeat and fibronectin type III domain containing 4 [Source:RGD Symbol;Acc:1585286]
ENSRNOG00000026579	38.3865	0.445523	0.251599	1.77077	0.0765989	0.12102	ENSRNOG00000026579	AC119332.1
ENSRNOG00000069185	2899.96	-0.24996	0.0579769	-4.31138	1.62238e-05	5.65225e-05	ENSRNOG00000069185	Tmem9b	TMEM9 domain family, member B [Source:RGD Symbol;Acc:1310775]
ENSRNOG00000019708	2945.46	-0.159722	0.0431478	-3.70174	0.000214128	0.000611012	ENSRNOG00000019708	Ctsf	cathepsin F [Source:RGD Symbol;Acc:1308181]
ENSRNOG00000019745	84.4828	0.649429	0.203533	3.19078	0.00141887	0.0034529	ENSRNOG00000019745	Actn3	actinin alpha 3 [Source:RGD Symbol;Acc:621792]
ENSRNOG00000013290	1192.75	0.104691	0.0504043	2.07703	0.0377983	0.0653503	ENSRNOG00000013290	Nrip3	nuclear receptor interacting protein 3 [Source:RGD Symbol;Acc:1304777]
ENSRNOG00000019825	337.597	-0.162353	0.0851844	-1.9059	0.0566638	0.0930154	ENSRNOG00000019825	Zdhhc24	zinc finger, DHHC-type containing 24 [Source:RGD Symbol;Acc:1565630]
ENSRNOG00000013934	1533.11	0.163382	0.159474	1.0245	0.305599	0.3925	ENSRNOG00000013934	Dennd2b	DENN domain containing 2B [Source:RGD Symbol;Acc:1308995]
ENSRNOG00000020300	85.4543	0.0803453	0.165448	0.485622	0.627236	0.704252	ENSRNOG00000020300	Lsp1	lymphocyte-specific protein 1 [Source:RGD Symbol;Acc:1306133]
ENSRNOG00000019832	1379.87	-0.0212407	0.0543011	-0.391164	0.695676	0.761776	ENSRNOG00000019832	Bbs1	Bardet-Biedl syndrome 1 [Source:RGD Symbol;Acc:1307581]
ENSRNOG00000016063	1337.67	-0.0969135	0.0474854	-2.04091	0.0412597	0.0704033	ENSRNOG00000016063	Vps35l	VPS35 endosomal protein sorting factor like [Source:RGD Symbol;Acc:1564485]
ENSRNOG00000012911	544.56	0.25413	0.0713477	3.56185	0.000368251	0.00100837	ENSRNOG00000012911	Erlin1	ER lipid raft associated 1 [Source:RGD Symbol;Acc:1307058]
ENSRNOG00000059968	1020.68	0.151957	0.0592075	2.56652	0.0102725	0.0206403	ENSRNOG00000059968	Jak2	Janus kinase 2 [Source:RGD Symbol;Acc:2939]
ENSRNOG00000070112	1136.34	0.0938908	0.0663233	1.41565	0.156877	0.224059	ENSRNOG00000070112	Knop1	lysine-rich nucleolar protein 1 [Source:RGD Symbol;Acc:1565096]
ENSRNOG00000031485	1462.11	-0.308654	0.0670204	-4.60537	4.11725e-06	1.58419e-05	ENSRNOG00000031485	Dpp3	dipeptidylpeptidase 3 [Source:RGD Symbol;Acc:621127]
ENSRNOG00000036758	148.088	-0.32278	0.124212	-2.59863	0.00935973	0.0190061	ENSRNOG00000036758	Iqck	IQ motif containing K [Source:RGD Symbol;Acc:6502881]
ENSRNOG00000020113	773.84	0.201143	0.0619364	3.24757	0.00116393	0.00288765	ENSRNOG00000020113	Cnnm2	cyclin and CBS domain divalent metal cation transport mediator 2 [Source:RGD Symbol;Acc:1308162]
ENSRNOG00000016013	11721.8	-0.0816771	0.044941	-1.81743	0.0691517	0.110748	ENSRNOG00000016013	Gprc5b	G protein-coupled receptor, class C, group 5, member B [Source:RGD Symbol;Acc:1309510]
ENSRNOG00000019693	1787.19	0.0534244	0.0470163	1.13629	0.255833	0.338925	ENSRNOG00000019693	Clpb	caseinolytic mitochondrial matrix peptidase chaperone subunit B [Source:RGD Symbol;Acc:621328]
ENSRNOG00000063290	60.2163	-0.292505	0.206379	-1.41732	0.15639	0.223518	ENSRNOG00000063290	Hs3st4	heparan sulfate-glucosamine 3-sulfotransferase 4 [Source:RGD Symbol;Acc:11422907]
ENSRNOG00000020332	22.7977	-0.0847341	0.353529	-0.23968	0.810578	0.856341	ENSRNOG00000020332	Tnnt3	troponin T3, fast skeletal type [Source:RGD Symbol;Acc:3883]
ENSRNOG00000018604	1457.1	-0.234766	0.0536239	-4.37801	1.19769e-05	4.26755e-05	ENSRNOG00000018604	Tufm	Tu translation elongation factor, mitochondrial [Source:RGD Symbol;Acc:1305501]
ENSRNOG00000049181	2060.32	-0.0609498	0.0505088	-1.20672	0.227541	0.307199	ENSRNOG00000049181	Sh2b1	SH2B adaptor protein 1 [Source:RGD Symbol;Acc:620132]
ENSRNOG00000069369	33.6983	1.08811	0.283959	3.83191	0.00012715	0.000379282	ENSRNOG00000069369	LOC691519	similar to ankyrin repeat domain 26 [Source:RGD Symbol;Acc:1582795]
ENSRNOG00000036742	5786.54	-0.0790888	0.0335722	-2.35578	0.0184837	0.034637	ENSRNOG00000036742	Uqcrc2	ubiquinol cytochrome c reductase core protein 2 [Source:RGD Symbol;Acc:1359150]
ENSRNOG00000015310	49.6113	-1.06784	0.240366	-4.44254	8.89025e-06	3.24197e-05	ENSRNOG00000015310	Lrrc32	leucine rich repeat containing 32 [Source:RGD Symbol;Acc:1309087]
ENSRNOG00000027456	771.733	0.0698735	0.0848657	0.823342	0.410314	0.500293	ENSRNOG00000027456	Cdc42bpg	CDC42 binding protein kinase gamma [Source:RGD Symbol;Acc:1307260]
ENSRNOG00000016292	27.014	0.838691	0.312469	2.68407	0.00727314	0.0151395	ENSRNOG00000016292	Pdzd9	PDZ domain containing 9 [Source:RGD Symbol;Acc:1560558]
ENSRNOG00000019950	346.698	0.00188052	0.0868687	0.0216479	0.982729	0.987694	ENSRNOG00000019950	Peli3	pellino E3 ubiquitin protein ligase family member 3 [Source:RGD Symbol;Acc:1305989]
ENSRNOG00000017260	751.312	-0.313816	0.0735809	-4.26492	1.99978e-05	6.85523e-05	ENSRNOG00000017260	Cdr2	cerebellar degeneration-related protein 2 [Source:RGD Symbol;Acc:1310578]
ENSRNOG00000020010	756.466	-0.157202	0.0736593	-2.13418	0.032828	0.0576904	ENSRNOG00000020010	Kctd13	potassium channel tetramerization domain containing 13 [Source:RGD Symbol;Acc:735189]
ENSRNOG00000016343	2394.02	-0.128018	0.0783753	-1.6334	0.102385	0.156023	ENSRNOG00000016343	Dkk3	dickkopf WNT signaling pathway inhibitor 3 [Source:RGD Symbol;Acc:621846]
ENSRNOG00000032929	813.878	0.029568	0.088093	0.335645	0.737139	0.797377	ENSRNOG00000032929	Incenp	inner centromere protein [Source:RGD Symbol;Acc:1305292]
ENSRNOG00000027213	794.338	-0.426761	0.0828684	-5.14987	2.60673e-07	1.1907e-06	ENSRNOG00000027213	Asphd1	aspartate beta-hydroxylase domain containing 1 [Source:RGD Symbol;Acc:1306636]
ENSRNOG00000019613	1074.91	-0.33469	0.0665592	-5.02846	4.94425e-07	2.16708e-06	ENSRNOG00000019613	Syt9	synaptotagmin 9 [Source:RGD Symbol;Acc:621169]
ENSRNOG00000026942	1519.51	0.359432	0.061725	5.82312	5.77586e-09	3.36157e-08	ENSRNOG00000026942	RGD1311595	similar to KIAA2026 protein [Source:RGD Symbol;Acc:1311595]
ENSRNOG00000024144	3602.42	-0.418846	0.0602118	-6.95622	3.49536e-12	3.04841e-11	ENSRNOG00000024144	Cdipt	CDP-diacylglycerol--inositol 3-phosphatidyltransferase [Source:RGD Symbol;Acc:620576]
ENSRNOG00000016748	710.45	-0.31452	0.0936847	-3.35722	0.000787317	0.00202169	ENSRNOG00000016748	Poll	DNA polymerase lambda [Source:RGD Symbol;Acc:1308053]
ENSRNOG00000017622	68.2282	-0.2262	0.175141	-1.29153	0.19652	0.270978	ENSRNOG00000017622	Npm3	nucleophosmin/nucleoplasmin, 3 [Source:RGD Symbol;Acc:1565542]
ENSRNOG00000010752	1431.25	0.320244	0.0509271	6.28827	3.21023e-10	2.21243e-09	ENSRNOG00000010752	Tmem41b	transmembrane protein 41B [Source:RGD Symbol;Acc:1310870]
ENSRNOG00000062870	2564.13	0.233703	0.0527376	4.43144	9.3606e-06	3.39898e-05	ENSRNOG00000062870	rnf141	ring finger protein 141 [Source:RGD Symbol;Acc:1303154]
ENSRNOG00000019662	797.013	0.290626	0.0760583	3.8211	0.00013286	0.000394128	ENSRNOG00000019662	Tm6sf1	transmembrane 6 superfamily member 1 [Source:RGD Symbol;Acc:1307978]
ENSRNOG00000020179	2136.1	-0.0114517	0.0441098	-0.259618	0.795158	0.844122	ENSRNOG00000020179	Nt5c2	5'-nucleotidase, cytosolic II [Source:RGD Symbol;Acc:2323387]
ENSRNOG00000026754	3712.76	0.0314662	0.0476012	0.661039	0.508587	0.59746	ENSRNOG00000026754	Usp47	ubiquitin specific peptidase 47 [Source:RGD Symbol;Acc:1310411]
ENSRNOG00000018164	2302.09	-0.0623334	0.0521808	-1.19457	0.232256	0.312538	ENSRNOG00000018164	Spcs2	signal peptidase complex subunit 2 [Source:RGD Symbol;Acc:1311253]
ENSRNOG00000009910	114.232	-0.280977	0.167875	-1.67373	0.0941834	0.144928	ENSRNOG00000009910	Swap70	switching B-cell complex subunit SWAP70 [Source:RGD Symbol;Acc:1305579]
ENSRNOG00000019740	1121.43	0.553369	0.0782351	7.07316	1.51449e-12	1.37278e-11	ENSRNOG00000019740	Hdgfl3	HDGF like 3 [Source:RGD Symbol;Acc:628773]
ENSRNOG00000017241	833.305	-0.343885	0.0635377	-5.4123	6.22193e-08	3.11547e-07	ENSRNOG00000017241	Dpcd	deleted in primary ciliary dyskinesia [Source:RGD Symbol;Acc:1307648]
ENSRNOG00000036572	371.077	0.367274	0.0887404	4.13875	3.49206e-05	0.000115141	ENSRNOG00000036572	Sfxn4	sideroflexin 4 [Source:RGD Symbol;Acc:1306088]
ENSRNOG00000046211	723.152	-0.19602	0.0628144	-3.12063	0.00180468	0.00430449	ENSRNOG00000046211	Fbxw4	F-box and WD repeat domain containing 4 [Source:RGD Symbol;Acc:1306518]
ENSRNOG00000022619	28958.1	-0.392623	0.0524767	-7.48185	7.32858e-14	7.77911e-13	ENSRNOG00000022619	Fth1	ferritin heavy chain 1 [Source:RGD Symbol;Acc:2635]
ENSRNOG00000022732	674.478	0.00164126	0.0725334	0.0226276	0.981947	0.98725	ENSRNOG00000022732	Tmem126b	transmembrane protein 126B [Source:RGD Symbol;Acc:1308371]
ENSRNOG00000020248	9345.99	-0.0968208	0.0576867	-1.67839	0.0932708	0.143671	ENSRNOG00000020248	Ina	internexin neuronal intermediate filament protein, alpha [Source:RGD Symbol;Acc:2911]
ENSRNOG00000020376	291.915	0.0539678	0.110211	0.489676	0.624363	0.701623	ENSRNOG00000020376	Stn1	STN1 subunit of CST complex [Source:RGD Symbol;Acc:1305637]
ENSRNOG00000020339	3953.45	-0.302699	0.063373	-4.77647	1.78402e-06	7.23624e-06	ENSRNOG00000020339	Neurl1	neuralized E3 ubiquitin protein ligase 1 [Source:RGD Symbol;Acc:1307021]
ENSRNOG00000047545	103.06	-0.157717	0.141776	-1.11243	0.265951	0.350093	ENSRNOG00000047545	Adra2a	adrenoceptor alpha 2A [Source:RGD Symbol;Acc:2056]
ENSRNOG00000020346	23.6891	-0.308566	0.313014	-0.985788	0.324237	0.411956	ENSRNOG00000020346	Best1	bestrophin 1 [Source:RGD Symbol;Acc:1311656]
ENSRNOG00000014574	238.162	-0.0593303	0.112815	-0.525909	0.598951	0.679788	ENSRNOG00000014574	Entpd1	ectonucleoside triphosphate diphosphohydrolase 1 [Source:RGD Symbol;Acc:69265]
ENSRNOG00000015235	582.356	-0.13638	0.0776378	-1.75661	0.0789835	0.124283	ENSRNOG00000015235	Fra10ac1	FRA10A associated CGG repeat 1 [Source:RGD Symbol;Acc:1309482]
ENSRNOG00000020349	113.3	-0.081755	0.164084	-0.498249	0.618308	0.696815	ENSRNOG00000020349	Rab3il1	RAB3A interacting protein-like 1 [Source:RGD Symbol;Acc:619764]
ENSRNOG00000020353	144.732	0.308444	0.144227	2.1386	0.0324682	0.0571202	ENSRNOG00000020353	Sh3pxd2a	SH3 and PX domains 2A [Source:RGD Symbol;Acc:1311185]
ENSRNOG00000050585	13435.5	-0.29477	0.0363723	-8.10424	5.30767e-16	7.20305e-15	ENSRNOG00000050585	Pgam1	phosphoglycerate mutase 1 [Source:RGD Symbol;Acc:3312]
ENSRNOG00000048708	613.405	-0.124886	0.104239	-1.19808	0.230887	0.311096	ENSRNOG00000048708	Exosc1	exosome component 1 [Source:RGD Symbol;Acc:1591855]
ENSRNOG00000014758	1706.96	0.208655	0.0833301	2.50396	0.0122811	0.0242301	ENSRNOG00000014758	Lgi1	leucine-rich, glioma inactivated 1 [Source:RGD Symbol;Acc:628742]
ENSRNOG00000020385	116.07	-0.0935355	0.135288	-0.69138	0.489327	0.578719	ENSRNOG00000020385	Fads3	fatty acid desaturase 3 [Source:RGD Symbol;Acc:628876]
ENSRNOG00000016172	1493.85	0.519098	0.0494104	10.5058	8.11899e-26	2.90384e-24	ENSRNOG00000016172	Ric1	RIC1 homolog, RAB6A GEF complex partner 1 [Source:RGD Symbol;Acc:1310016]
ENSRNOG00000046530	607.308	-0.228405	0.0768261	-2.97302	0.00294887	0.00673174	ENSRNOG00000046530	Zdhhc16	zinc finger DHHC-type palmitoyltransferase 16 [Source:RGD Symbol;Acc:1591893]
ENSRNOG00000017438	184.109	0.0396744	0.12043	0.32944	0.741823	0.800953	ENSRNOG00000017438	Gfra1	GDNF family receptor alpha 1 [Source:RGD Symbol;Acc:2681]
ENSRNOG00000045752	1552.62	-0.170491	0.0641999	-2.65563	0.00791603	0.0163326	ENSRNOG00000045752	Rrm1	ribonucleotide reductase catalytic subunit M1 [Source:RGD Symbol;Acc:1592569]
ENSRNOG00000012552	1427.59	-0.134521	0.057953	-2.32121	0.0202756	0.0375585	ENSRNOG00000012552	Ints4	integrator complex subunit 4 [Source:RGD Symbol;Acc:1305036]
ENSRNOG00000022099	26.5875	0.41303	0.337422	1.22408	0.220924	0.299984	ENSRNOG00000022099	Trim72	tripartite motif containing 72 [Source:RGD Symbol;Acc:1562778]
ENSRNOG00000020440	584.104	-0.27246	0.102916	-2.6474	0.00811144	0.016712	ENSRNOG00000020440	Fads2	fatty acid desaturase 2 [Source:RGD Symbol;Acc:68339]
ENSRNOG00000012584	131.596	-0.242823	0.152224	-1.59517	0.110674	0.166729	ENSRNOG00000012584	Aamdc	adipogenesis associated, Mth938 domain containing [Source:RGD Symbol;Acc:1561459]
ENSRNOG00000012820	4873.79	0.0976106	0.0438462	2.2262	0.0260006	0.0469596	ENSRNOG00000012820	Add3	adducin 3 [Source:RGD Symbol;Acc:2043]
ENSRNOG00000053923	1099.95	-0.0429689	0.0597062	-0.719671	0.471727	0.562117	ENSRNOG00000053923	Thap12	THAP domain containing 12 [Source:RGD Symbol;Acc:1309679]
ENSRNOG00000022635	2428.59	0.439512	0.0745813	5.89305	3.79122e-09	2.25902e-08	ENSRNOG00000022635	Dlg2	discs large MAGUK scaffold protein 2 [Source:RGD Symbol;Acc:619895]
ENSRNOG00000046769	1139.06	-0.00983681	0.068864	-0.142844	0.886413	0.915933	ENSRNOG00000046769	Mms19	MMS19 homolog, cytosolic iron-sulfur assembly component [Source:RGD Symbol;Acc:727890]
ENSRNOG00000024194	1184.67	0.354629	0.0819832	4.32563	1.52096e-05	5.32961e-05	ENSRNOG00000024194	Rsf1	remodeling and spacing factor 1 [Source:RGD Symbol;Acc:1311245]
ENSRNOG00000026204	499.008	0.240786	0.0738619	3.25995	0.00111433	0.00277692	ENSRNOG00000026204	Dclre1a	DNA cross-link repair 1A [Source:RGD Symbol;Acc:1306156]
ENSRNOG00000067387	7563.16	-0.432263	0.0574737	-7.52106	5.43352e-14	5.84879e-13	ENSRNOG00000067387	Sbk1	SH3 domain binding kinase 1 [Source:RGD Symbol;Acc:628713]
ENSRNOG00000015221	3302.27	-0.330033	0.0611376	-5.3982	6.73125e-08	3.35431e-07	ENSRNOG00000015221	Eif3f	eukaryotic translation initiation factor 3, subunit F [Source:RGD Symbol;Acc:1306112]
ENSRNOG00000010915	2439.17	0.092854	0.0566804	1.6382	0.101379	0.154619	ENSRNOG00000010915	Ermp1	endoplasmic reticulum metallopeptidase 1 [Source:RGD Symbol;Acc:727831]
ENSRNOG00000015713	835.063	-0.0424031	0.082754	-0.512399	0.608371	0.68818	ENSRNOG00000015713	Parva	parvin, alpha [Source:RGD Symbol;Acc:71021]
ENSRNOG00000016948	481.922	0.986428	0.0782144	12.6118	1.8168e-36	1.68037e-34	ENSRNOG00000016948	Nhlrc2	NHL repeat containing 2 [Source:RGD Symbol;Acc:1307348]
ENSRNOG00000020424	197.478	-0.450588	0.204889	-2.19918	0.0278651	0.0499234	ENSRNOG00000020424	Plpp4	phospholipid phosphatase 4 [Source:RGD Symbol;Acc:1306289]
ENSRNOG00000046566	433.825	0.186822	0.0889167	2.10109	0.0356333	0.062042	ENSRNOG00000046566	Tub	TUB bipartite transcription factor [Source:RGD Symbol;Acc:3918]
ENSRNOG00000057623	2356.79	-0.0716317	0.0412537	-1.73637	0.0824986	0.129167	ENSRNOG00000057623	Copb1	COPI coat complex subunit beta 1 [Source:RGD Symbol;Acc:620861]
ENSRNOG00000012763	1313.81	0.29221	0.068983	4.23597	2.27564e-05	7.7261e-05	ENSRNOG00000012763	Cwf19l1	CWF19 like cell cycle control factor 1 [Source:RGD Symbol;Acc:1304716]
ENSRNOG00000017201	3303.5	-0.099307	0.0483954	-2.05199	0.0401705	0.0688197	ENSRNOG00000017201	Cd2bp2	Cd2 (cytoplasmic tail) binding protein 2 [Source:RGD Symbol;Acc:1311741]
ENSRNOG00000014691	1828.16	0.223407	0.0515117	4.33701	1.44437e-05	5.08329e-05	ENSRNOG00000014691	Ric3	RIC3 acetylcholine receptor chaperone [Source:RGD Symbol;Acc:1588939]
ENSRNOG00000056216	87.2162	-0.1888	0.19646	-0.961006	0.336549	0.425051	ENSRNOG00000056216	Casp7	caspase 7 [Source:RGD Symbol;Acc:620944]
ENSRNOG00000011745	2188.52	-0.183087	0.0496509	-3.68748	0.000226488	0.000644112	ENSRNOG00000011745	Psma1	proteasome 20S subunit alpha 1 [Source:RGD Symbol;Acc:61841]
ENSRNOG00000070303	45.7559	1.71586	0.256244	6.69618	2.13932e-11	1.70969e-10	ENSRNOG00000070303
ENSRNOG00000056562	413.916	0.248151	0.103744	2.39195	0.0167589	0.0317614	ENSRNOG00000056562	Olfml1	olfactomedin-like 1 [Source:RGD Symbol;Acc:1311854]
ENSRNOG00000065255	277.234	0.0260704	0.274294	0.0950455	0.924279	0.943843	ENSRNOG00000065255	Gsg1l	GSG1-like [Source:RGD Symbol;Acc:1562278]
ENSRNOG00000011339	1697.35	0.15943	0.0730891	2.18131	0.0291602	0.0519807	ENSRNOG00000011339	Slk	STE20-like kinase [Source:RGD Symbol;Acc:3780]
ENSRNOG00000031643	339.707	-0.143473	0.0906026	-1.58354	0.113297	0.170081	ENSRNOG00000031643	Dchs1	dachsous cadherin-related 1 [Source:RGD Symbol;Acc:1309878]
ENSRNOG00000019667	337.103	0.184625	0.109038	1.69321	0.090416	0.139926	ENSRNOG00000019667	Ppfibp2	PPFIA binding protein 2 [Source:RGD Symbol;Acc:1565383]
ENSRNOG00000019369	688.293	-0.0743022	0.072888	-1.0194	0.308012	0.395215	ENSRNOG00000019369	Slx1b	SLX1 homolog B, structure-specific endonuclease subunit [Source:RGD Symbol;Acc:1311568]
ENSRNOG00000047988	341.8	-0.749663	0.116977	-6.40865	1.46809e-10	1.06378e-09	ENSRNOG00000047988	Bola2	bolA family member 2 [Source:RGD Symbol;Acc:1565363]
ENSRNOG00000019430	1487.96	-0.526355	0.0950625	-5.53694	3.07804e-08	1.60893e-07	ENSRNOG00000019430	Coro1a	coronin 1A [Source:RGD Symbol;Acc:620009]
ENSRNOG00000012206	10830.5	-0.138777	0.0412573	-3.3637	0.000769063	0.00197936	ENSRNOG00000012206	Dennd5a	DENN domain containing 5A [Source:RGD Symbol;Acc:1306759]
ENSRNOG00000030807	431.896	0.135019	0.0887134	1.52197	0.128017	0.188916	ENSRNOG00000030807	LOC100912427	nuclease-sensitive element-binding protein 1-like [Source:RGD Symbol;Acc:6486912]
ENSRNOG00000019751	131.203	0.323988	0.149162	2.17205	0.0298517	0.053083	ENSRNOG00000019751	Cyb5r2	cytochrome b5 reductase 2 [Source:RGD Symbol;Acc:1308421]
ENSRNOG00000014629	46.5324	-0.436549	0.307477	-1.41978	0.155672	0.222535	ENSRNOG00000014629	Lmo1	LIM domain only 1 [Source:RGD Symbol;Acc:621166]
ENSRNOG00000047098	5869.53	-0.758742	0.228413	-3.32179	0.000894405	0.00226978	ENSRNOG00000047098	Hbb	hemoglobin subunit beta [Source:RGD Symbol;Acc:2783]
ENSRNOG00000050846	155.307	-0.326341	0.127688	-2.55576	0.0105955	0.0212217	ENSRNOG00000050846	Timm10b	translocase of inner mitochondrial membrane 10B [Source:RGD Symbol;Acc:71097]
ENSRNOG00000051291	241.891	0.806871	0.138711	5.81691	5.99457e-09	3.48468e-08	ENSRNOG00000051291	Dnhd1	dynein heavy chain domain 1 [Source:RGD Symbol;Acc:1584052]
ENSRNOG00000056658	436.969	0.676325	0.0936223	7.22398	5.0488e-13	4.84879e-12	ENSRNOG00000056658	Xylt1	xylosyltransferase 1 [Source:RGD Symbol;Acc:620093]
ENSRNOG00000018320	5250.89	-0.497251	0.0552324	-9.00289	2.19846e-19	4.2005e-18	ENSRNOG00000018320	Rps15a	ribosomal protein S15a [Source:RGD Symbol;Acc:619939]
ENSRNOG00000011417	514.553	0.453672	0.0891965	5.08621	3.65291e-07	1.63062e-06	ENSRNOG00000011417	Pde3b	phosphodiesterase 3B [Source:RGD Symbol;Acc:61943]
ENSRNOG00000011367	33.2906	0.367596	0.282763	1.30002	0.193595	0.267504	ENSRNOG00000011367	Cyp2r1	cytochrome P450, family 2, subfamily r, polypeptide 1 [Source:RGD Symbol;Acc:1311866]
ENSRNOG00000067892	40.6272	0.762074	0.276253	2.75861	0.00580479	0.0124232	ENSRNOG00000067892	LOC100912041	uncharacterized LOC100912041 [Source:RGD Symbol;Acc:6489539]
ENSRNOG00000067218	106.048	0.466924	0.162295	2.87702	0.00401453	0.0089177	ENSRNOG00000067218
ENSRNOG00000062713	2817.25	0.117457	0.0490029	2.39694	0.0165324	0.0314183	ENSRNOG00000062713
ENSRNOG00000065005	92.8251	-0.189518	0.16797	-1.12828	0.2592	0.342354	ENSRNOG00000065005
ENSRNOG00000066426	1608.62	0.52566	0.0548123	9.59017	8.79363e-22	2.15696e-20	ENSRNOG00000066426
ENSRNOG00000063937	2561.01	-0.0676906	0.0511535	-1.32328	0.185741	0.258249	ENSRNOG00000063937
ENSRNOG00000067172	4082.61	0.104482	0.0613008	1.70441	0.0883038	0.137096	ENSRNOG00000067172
ENSRNOG00000070479	2513.98	0.769709	0.0685892	11.222	3.17945e-29	1.58655e-27	ENSRNOG00000070479
ENSRNOG00000066155	1793.04	-0.210876	0.0817129	-2.58069	0.00986018	0.0198916	ENSRNOG00000066155
ENSRNOG00000067163	641.033	-0.266197	0.0831442	-3.20162	0.00136655	0.00333957	ENSRNOG00000067163
ENSRNOG00000068916	463.045	0.700071	0.0801671	8.73264	2.48791e-18	4.29061e-17	ENSRNOG00000068916
ENSRNOG00000062328	1651.69	0.38011	0.0562465	6.75794	1.39971e-11	1.13676e-10	ENSRNOG00000062328
ENSRNOG00000067663	88.9438	-0.00235279	0.158792	-0.0148168	0.988178	0.991867	ENSRNOG00000067663
ENSRNOG00000069106	37.6614	0.322794	0.268517	1.20213	0.229312	0.309234	ENSRNOG00000069106
ENSRNOG00000069402	24.5814	1.06742	0.337703	3.16083	0.00157322	0.00379859	ENSRNOG00000069402
ENSRNOG00000071111	40.2574	0.479972	0.261388	1.83624	0.0663218	0.10684	ENSRNOG00000071111
ENSRNOG00000064113	148.453	0.127977	0.126755	1.00964	0.312666	0.400091	ENSRNOG00000064113
ENSRNOG00000068440	126.433	3.50863	0.378544	9.26875	1.88348e-20	3.98689e-19	ENSRNOG00000068440
ENSRNOG00000070062	45.1512	0.766356	0.284906	2.68986	0.00714829	0.014916	ENSRNOG00000070062	LOC108348488	uncharacterized LOC108348488 [Source:RGD Symbol;Acc:11392724]
ENSRNOG00000069440	38.7373	1.328	0.300276	4.42259	9.75244e-06	3.52627e-05	ENSRNOG00000069440
ENSRNOG00000067183	67.9093	0.102485	0.191883	0.5341	0.593273	0.675097	ENSRNOG00000067183	LOC103691053	uncharacterized LOC103691053 [Source:RGD Symbol;Acc:9431454]
ENSRNOG00000066241	93.1182	0.235643	0.167757	1.40467	0.160119	0.228062	ENSRNOG00000066241
ENSRNOG00000065487	184.449	-0.0168557	0.123806	-0.136146	0.891706	0.919413	ENSRNOG00000065487
ENSRNOG00000065497	423.28	1.00176	0.0902878	11.0951	1.32447e-28	6.26471e-27	ENSRNOG00000065497	LOC102547183	uncharacterized LOC102547183 [Source:RGD Symbol;Acc:7677078]
ENSRNOG00000064891	319.856	1.13235	0.16618	6.81399	9.49273e-12	7.84988e-11	ENSRNOG00000064891
ENSRNOG00000064120	308.366	0.58848	0.136941	4.29734	1.72863e-05	5.99081e-05	ENSRNOG00000064120
ENSRNOG00000064053	1691.97	0.130729	0.0776619	1.68331	0.0923153	0.142456	ENSRNOG00000064053	Ctxnd1	cortexin domain containing 1 [Source:RGD Symbol;Acc:7557291]
ENSRNOG00000065190	156.98	-0.0841472	0.127951	-0.657649	0.510763	0.599337	ENSRNOG00000065190
ENSRNOG00000028449	260.223	0.15232	0.128197	1.18818	0.234763	0.315327	ENSRNOG00000028449	Rpl9	ribosomal protein L9 [Source:RGD Symbol;Acc:62049]
ENSRNOG00000063029	48.5918	-0.0438205	0.227579	-0.192551	0.847311	0.885838	ENSRNOG00000063029
ENSRNOG00000060587	624.566	0.567	0.0879669	6.44561	1.15135e-10	8.41831e-10	ENSRNOG00000060587	AABR07002627.1
ENSRNOG00000060288	285.137	-0.0133782	0.0965312	-0.13859	0.889774	0.918165	ENSRNOG00000060288	LOC100365062	eukaryotic translation initiation factor 3, subunit 6 48kDa-like [Source:RGD Symbol;Acc:2319808]
ENSRNOG00000014252	866.539	-0.50039	0.0793314	-6.30758	2.83426e-10	1.96826e-09	ENSRNOG00000014252	Irf2bp1	interferon regulatory factor 2 binding protein 1 [Source:RGD Symbol;Acc:1308312]
ENSRNOG00000063049	2584.72	0.0706924	0.0565988	1.24901	0.211662	0.28941	ENSRNOG00000063049	Pnma8c	PNMA family member 8C [Source:RGD Symbol;Acc:41230706]
ENSRNOG00000016863	10810.2	-0.346091	0.0491613	-7.03991	1.9237e-12	1.72836e-11	ENSRNOG00000016863	Pnma8b	PNMA family member 8B [Source:RGD Symbol;Acc:1560435]
ENSRNOG00000063636	97.4684	0.591485	0.148787	3.97539	7.02655e-05	0.00022004	ENSRNOG00000063636	Gng5	G protein subunit gamma 5 [Source:RGD Symbol;Acc:620807]
ENSRNOG00000065335	236.696	-0.14204	0.113701	-1.24925	0.211574	0.289373	ENSRNOG00000065335
ENSRNOG00000050758	260.02	0.244949	0.0987329	2.48093	0.0131041	0.0256172	ENSRNOG00000050758	Epc2l1	enhancer of polycomb homolog 2 (Drosophila)-like 1 [Source:RGD Symbol;Acc:1561337]
ENSRNOG00000066033	651.354	-0.508857	0.114024	-4.46271	8.09285e-06	2.96908e-05	ENSRNOG00000066033	Marcksl1	MARCKS-related protein-like [Source:RGD Symbol;Acc:9082300]
ENSRNOG00000047045	514.766	-0.340634	0.0798288	-4.26705	1.98075e-05	6.79644e-05	ENSRNOG00000047045	Sdhaf1	succinate dehydrogenase complex assembly factor 1 [Source:RGD Symbol;Acc:1562079]
ENSRNOG00000032232	123.193	-0.329179	0.135189	-2.43496	0.0148936	0.0286868	ENSRNOG00000032232	Snrpg	small nuclear ribonucleoprotein polypeptide G [Source:RGD Symbol;Acc:1584713]
ENSRNOG00000030351	180.907	-0.0479474	0.117564	-0.407841	0.68339	0.75161	ENSRNOG00000030351	LOC108348989	high mobility group protein B1 pseudogene [Source:RGD Symbol;Acc:11444414]
ENSRNOG00000031859	360.619	-0.66236	0.103567	-6.39548	1.60043e-10	1.15277e-09	ENSRNOG00000031859	RGD1562402	similar to 60S ribosomal protein L27a [Source:RGD Symbol;Acc:1562402]
ENSRNOG00000037348	33.0331	-0.279394	0.233459	-1.19676	0.231402	0.311647	ENSRNOG00000037348	LOC120099798	interferon-stimulated 20 kDa exonuclease-like 2 [Source:RGD Symbol;Acc:41207608]
ENSRNOG00000021128	1030.2	-0.271166	0.0865109	-3.13447	0.00172162	0.00412467	ENSRNOG00000021128	Kcnj11	potassium inwardly-rectifying channel, subfamily J, member 11 [Source:RGD Symbol;Acc:69247]
ENSRNOG00000010146	1594	-0.0530536	0.0555779	-0.954581	0.33979	0.428492	ENSRNOG00000010146	Ndn	necdin, MAGE family member [Source:RGD Symbol;Acc:1310526]
ENSRNOG00000070574	552.898	-0.441395	0.0855678	-5.15842	2.49038e-07	1.13934e-06	ENSRNOG00000070574	LOC691427	ATP synthase membrane subunit 6.8PL, pseudogene 1 [Source:RGD Symbol;Acc:41312538]
ENSRNOG00000012349	676.378	-0.292417	0.091372	-3.20029	0.00137291	0.00335228	ENSRNOG00000012349	Tlnrd1	talin rod domain containing 1 [Source:RGD Symbol;Acc:1311666]
ENSRNOG00000048071	42.4702	0.434771	0.238168	1.82548	0.067928	0.109089	ENSRNOG00000048071	Ccdc89	coiled-coil domain-containing protein 89-like [Source:RGD Symbol;Acc:6490972]
ENSRNOG00000022941	34.8743	-0.765143	0.254304	-3.00877	0.0026231	0.00605096	ENSRNOG00000022941	LOC102549852	ferritin light chain 1-like [Source:RGD Symbol;Acc:7625414]
ENSRNOG00000063715	451.477	-0.0821358	0.0990611	-0.829143	0.407024	0.497047	ENSRNOG00000063715	LOC108349446	60S ribosomal protein L35a pseudogene [Source:RGD Symbol;Acc:11501622]
ENSRNOG00000018503	156.252	-0.362015	0.121883	-2.97019	0.0029762	0.00679092	ENSRNOG00000018503	AC098008.1
ENSRNOG00000013596	797.567	0.652819	0.0656801	9.93938	2.80578e-23	7.97313e-22	ENSRNOG00000013596	Dimt1	DIM1 rRNA methyltransferase and ribosome maturation factor [Source:RGD Symbol;Acc:1311752]
ENSRNOG00000022863	24.1857	0.497357	0.330134	1.50653	0.131931	0.193787	ENSRNOG00000022863	Lingo4	leucine rich repeat and Ig domain containing 4 [Source:RGD Symbol;Acc:1562025]
ENSRNOG00000015691	705.139	-0.342427	0.128455	-2.66575	0.00768178	0.0159035	ENSRNOG00000015691	Inka2	inka box actin regulator 2 [Source:RGD Symbol;Acc:1306526]
ENSRNOG00000065902	247.885	0.329354	0.134289	2.45258	0.0141836	0.0274796	ENSRNOG00000065902	LOC102549789	uncharacterized LOC102549789 [Source:RGD Symbol;Acc:7645336]
ENSRNOG00000069617	164.231	0.602932	0.12037	5.00898	5.47192e-07	2.38326e-06	ENSRNOG00000069617
ENSRNOG00000016408	253.978	0.551956	0.158126	3.49061	0.000481914	0.00129274	ENSRNOG00000016408	Kirrel1	kirre like nephrin family adhesion molecule 1 [Source:RGD Symbol;Acc:727883]
ENSRNOG00000019455	830.344	-0.130846	0.0669156	-1.95539	0.0505365	0.084243	ENSRNOG00000019455	Ap4b1	adaptor related protein complex 4 subunit beta 1 [Source:RGD Symbol;Acc:1310529]
ENSRNOG00000069092	179.761	0.597382	0.123259	4.84656	1.25618e-06	5.2147e-06	ENSRNOG00000069092
ENSRNOG00000013790	1576.06	-0.138056	0.0506461	-2.72589	0.00641279	0.0135718	ENSRNOG00000013790	Mfsd1	major facilitator superfamily domain containing 1 [Source:RGD Symbol;Acc:1305751]
ENSRNOG00000020893	3891.13	0.310935	0.0431367	7.20814	5.6721e-13	5.41516e-12	ENSRNOG00000020893	Snx27	sorting nexin 27 [Source:RGD Symbol;Acc:628705]
ENSRNOG00000062864	988.897	0.500819	0.0829655	6.03647	1.57518e-09	9.90181e-09	ENSRNOG00000062864	LOC120100659	uncharacterized LOC120100659 [Source:RGD Symbol;Acc:40960165]
ENSRNOG00000062875	157.823	-0.169807	0.139271	-1.21926	0.222746	0.30195	ENSRNOG00000062875
ENSRNOG00000009468	43.8736	-0.120397	0.250917	-0.47983	0.631348	0.707829	ENSRNOG00000009468	Il12a	interleukin 12A [Source:RGD Symbol;Acc:620562]
ENSRNOG00000064252	20.9103	-0.0293025	0.355667	-0.0823876	0.934338	0.951506	ENSRNOG00000064252	LOC102553736	uncharacterized LOC102553736 [Source:RGD Symbol;Acc:7678070]
ENSRNOG00000000096	446.175	-0.0437722	0.0782774	-0.559193	0.57603	0.659286	ENSRNOG00000000096	Pdzk1	PDZ domain containing 1 [Source:RGD Symbol;Acc:70924]
ENSRNOG00000014385	36.2154	0.47963	0.241674	1.98462	0.0471873	0.0793339	ENSRNOG00000014385	Wnt2b	Wnt family member 2B [Source:RGD Symbol;Acc:69346]
ENSRNOG00000011135	593.094	-0.485278	0.0691541	-7.01734	2.26133e-12	2.01948e-11	ENSRNOG00000011135	Gtf2b	general transcription factor IIB [Source:RGD Symbol;Acc:619735]
ENSRNOG00000066793	229.037	0.49716	0.101222	4.91158	9.03446e-07	3.81365e-06	ENSRNOG00000066793
ENSRNOG00000065021	55.277	1.1614	0.231888	5.00845	5.48693e-07	2.38908e-06	ENSRNOG00000065021	Naaladl2	N-acetylated alpha-linked acidic dipeptidase-like 2 [Source:RGD Symbol;Acc:1565147]
ENSRNOG00000062826	42.6932	-0.159875	0.239526	-0.667464	0.504476	0.593782	ENSRNOG00000062826	Gm17651	predicted gene, 17651 [Source:RGD Symbol;Acc:150342749]
ENSRNOG00000014000	2074.7	0.299663	0.04075	7.35369	1.92807e-13	1.93086e-12	ENSRNOG00000014000	Kif2a	kinesin family member 2A [Source:RGD Symbol;Acc:70974]
ENSRNOG00000062674	246.522	-0.116583	0.0995751	-1.1708	0.241677	0.322941	ENSRNOG00000062674
ENSRNOG00000016580	5575.22	-0.667658	0.0507849	-13.1468	1.77595e-39	1.99911e-37	ENSRNOG00000016580	Rps23	ribosomal protein S23 [Source:RGD Symbol;Acc:621039]
ENSRNOG00000065909	59.1875	0.587331	0.213149	2.75549	0.00586043	0.0125349	ENSRNOG00000065909
ENSRNOG00000009548	460.27	0.35495	0.0865596	4.10065	4.11993e-05	0.000134288	ENSRNOG00000009548	Fpgt	fucose-1-phosphate guanylyltransferase [Source:RGD Symbol;Acc:735121]
ENSRNOG00000016878	159.744	0.602064	0.164071	3.66953	0.000242994	0.000686614	ENSRNOG00000016878	Plppr5	phospholipid phosphatase related 5 [Source:RGD Symbol;Acc:1309567]
ENSRNOG00000070241	215.896	0.114428	0.135519	0.844373	0.398461	0.488398	ENSRNOG00000070241
ENSRNOG00000065226	117.405	0.827328	0.146619	5.64272	1.67387e-08	9.15366e-08	ENSRNOG00000065226	Ufm1	ubiquitin-fold modifier 1 [Source:RGD Symbol;Acc:1304890]
ENSRNOG00000019023	1548.94	-0.0995263	0.0557366	-1.78566	0.0741549	0.117683	ENSRNOG00000019023	Tars1	threonyl-tRNA synthetase 1 [Source:RGD Symbol;Acc:1359527]
ENSRNOG00000024213	1388.57	0.203329	0.0633301	3.21063	0.00132446	0.00324654	ENSRNOG00000024213	Golim4	golgi integral membrane protein 4 [Source:RGD Symbol;Acc:1310948]
ENSRNOG00000067530	778.695	0.0488742	0.0881023	0.554743	0.57907	0.661996	ENSRNOG00000067530	LOC103691527	uncharacterized LOC103691527 [Source:RGD Symbol;Acc:9202401]
ENSRNOG00000050321	1386.01	0.203072	0.0529287	3.83671	0.000124696	0.000372958	ENSRNOG00000050321	Zzz3	zinc finger, ZZ-type containing 3 [Source:RGD Symbol;Acc:1565468]
ENSRNOG00000069542	550.48	0.384422	0.106583	3.60678	0.000310022	0.000860606	ENSRNOG00000069542
ENSRNOG00000067311	1386.24	0.268927	0.0585743	4.59122	4.40662e-06	1.68657e-05	ENSRNOG00000067311
ENSRNOG00000000091	359.164	0.438156	0.0985812	4.44462	8.80467e-06	3.21399e-05	ENSRNOG00000000091	Smad9	SMAD family member 9 [Source:RGD Symbol;Acc:71004]
ENSRNOG00000067758	1856.86	0.0732878	0.0492542	1.48795	0.136764	0.199773	ENSRNOG00000067758	Slc10a5	solute carrier family 10, member 5 [Source:RGD Symbol;Acc:1306036]
ENSRNOG00000009388	887.407	0.153211	0.0993229	1.54255	0.122939	0.182629	ENSRNOG00000009388	Sptssb	serine palmitoyltransferase, small subunit B [Source:RGD Symbol;Acc:2324614]
ENSRNOG00000019671	1781.14	0.958975	0.0625071	15.3419	4.01445e-53	1.26726e-50	ENSRNOG00000019671	Rsbn1	round spermatid basic protein 1 [Source:RGD Symbol;Acc:1307231]
ENSRNOG00000066942	517.905	-0.292882	0.0695054	-4.21381	2.511e-05	8.456e-05	ENSRNOG00000066942	Cox6b1	cytochrome c oxidase subunit 6B1 [Source:RGD Symbol;Acc:1584097]
ENSRNOG00000065602	909.449	-0.595813	0.114058	-5.22377	1.75319e-07	8.22995e-07	ENSRNOG00000065602	Ftl1-ps14	ferritin light chain 1, pseudogene 14 [Source:RGD Symbol;Acc:2324713]
ENSRNOG00000016387	3077.68	-0.568769	0.0462869	-12.2879	1.05187e-34	8.3012e-33	ENSRNOG00000016387	Rpl34	ribosomal protein L34 [Source:RGD Symbol;Acc:1309402]
ENSRNOG00000013282	2932.08	0.449913	0.0541119	8.3145	9.21426e-17	1.35976e-15	ENSRNOG00000013282	Mctp1	multiple C2 and transmembrane domain containing 1 [Source:RGD Symbol;Acc:1305199]
ENSRNOG00000064826	24.6762	1.30866	0.34196	3.82695	0.000129742	0.000385989	ENSRNOG00000064826
ENSRNOG00000069709	1735.91	0.00133914	0.0485079	0.0276065	0.977976	0.984621	ENSRNOG00000069709	Tmem167b	transmembrane protein 167B [Source:RGD Symbol;Acc:1564454]
ENSRNOG00000062733	50.0994	-0.218118	0.210924	-1.03411	0.301086	0.387595	ENSRNOG00000062733	LOC102550011	uncharacterized LOC102550011 [Source:RGD Symbol;Acc:7675361]
ENSRNOG00000013886	32.1801	0.67717	0.299102	2.26401	0.0235733	0.0430523	ENSRNOG00000013886	Fyb1	FYN binding protein 1 [Source:RGD Symbol;Acc:1563421]
ENSRNOG00000047137	993.524	0.63704	0.069051	9.22564	2.81868e-20	5.8639e-19	ENSRNOG00000047137	Erbin	erbb2 interacting protein [Source:RGD Symbol;Acc:1562952]
ENSRNOG00000000095	925.993	-0.0330657	0.0583548	-0.566631	0.570965	0.654942	ENSRNOG00000000095	Gpr89b	G protein-coupled receptor 89B [Source:RGD Symbol;Acc:1304837]
ENSRNOG00000026059	495.433	-0.519601	0.113273	-4.58717	4.49295e-06	1.71555e-05	ENSRNOG00000026059	Paqr6	progestin and adipoQ receptor family member 6 [Source:RGD Symbol;Acc:1584722]
ENSRNOG00000066623	40.4711	0.113065	0.226902	0.498297	0.618275	0.696815	ENSRNOG00000066623
ENSRNOG00000064711	147.876	0.172746	0.129841	1.33044	0.183373	0.255273	ENSRNOG00000064711
ENSRNOG00000050343	1028.11	0.472034	0.0880447	5.3613	8.26252e-08	4.05475e-07	ENSRNOG00000050343	Jmy	junction mediating and regulatory protein, p53 cofactor [Source:RGD Symbol;Acc:1585601]
ENSRNOG00000067315	139.191	0.112652	0.131721	0.855236	0.392421	0.482011	ENSRNOG00000067315
ENSRNOG00000016872	1467.4	0.261856	0.0651943	4.01654	5.90577e-05	0.000187339	ENSRNOG00000016872	Plppr4	phospholipid phosphatase related 4 [Source:RGD Symbol;Acc:727806]
ENSRNOG00000065873	256.475	0.386288	0.107676	3.5875	0.000333862	0.000922202	ENSRNOG00000065873
ENSRNOG00000065683	89.2459	-0.151814	0.184748	-0.821733	0.411229	0.501259	ENSRNOG00000065683
ENSRNOG00000067598	152.341	1.23591	0.305574	4.04455	5.24243e-05	0.000167899	ENSRNOG00000067598
ENSRNOG00000046947	575.233	-0.12212	0.10586	-1.15359	0.248667	0.331184	ENSRNOG00000046947	Ak5	adenylate kinase 5 [Source:RGD Symbol;Acc:1590818]
ENSRNOG00000064998	102.479	0.180024	0.151607	1.18743	0.235057	0.315662	ENSRNOG00000064998
ENSRNOG00000032002	172.421	0.638115	0.114146	5.59036	2.26596e-08	1.21149e-07	ENSRNOG00000032002	Hapln1	hyaluronan and proteoglycan link protein 1 [Source:RGD Symbol;Acc:2412]
ENSRNOG00000060538	57.4441	0.0207568	0.209786	0.0989429	0.921184	0.941809	ENSRNOG00000060538	Cdc42se1	CDC42 small effector 1 [Source:RGD Symbol;Acc:1561700]
ENSRNOG00000015226	857.067	0.661061	0.0686296	9.6323	5.84066e-22	1.46734e-20	ENSRNOG00000015226	Man1a2	mannosidase, alpha, class 1A, member 2 [Source:RGD Symbol;Acc:1309767]
ENSRNOG00000042814	53.0203	0.953871	0.236599	4.0316	5.5398e-05	0.000176488	ENSRNOG00000042814	Henmt1	HEN methyltransferase 1 [Source:RGD Symbol;Acc:1306230]
ENSRNOG00000042068	1246.24	0.425662	0.0770654	5.52338	3.3253e-08	1.73133e-07	ENSRNOG00000042068	Otud7b	OTU deubiquitinase 7B [Source:RGD Symbol;Acc:1308111]
ENSRNOG00000064965	21.8422	0.195848	0.31767	0.616513	0.537556	0.624768	ENSRNOG00000064965
ENSRNOG00000048043	251.666	-0.0321262	0.11271	-0.285035	0.775618	0.827717	ENSRNOG00000048043	F2r	coagulation factor II (thrombin) receptor [Source:RGD Symbol;Acc:2586]
ENSRNOG00000009533	1067.24	0.0490317	0.0841065	0.582971	0.559913	0.645626	ENSRNOG00000009533	Erich3	glutamate-rich 3 [Source:RGD Symbol;Acc:1593279]
ENSRNOG00000067940	124.244	0.21119	0.13293	1.58873	0.112121	0.168594	ENSRNOG00000067940
ENSRNOG00000062438	519.997	-0.0436478	0.0760547	-0.5739	0.566035	0.650423	ENSRNOG00000062438
ENSRNOG00000063006	53.5356	0.361697	0.205464	1.76039	0.0783414	0.123384	ENSRNOG00000063006
ENSRNOG00000017105	153.154	0.246122	0.118818	2.07142	0.0383195	0.0661323	ENSRNOG00000017105	Dpyd	dihydropyrimidine dehydrogenase [Source:RGD Symbol;Acc:621218]
ENSRNOG00000062326	92.2277	0.107128	0.153676	0.697099	0.485741	0.575556	ENSRNOG00000062326
ENSRNOG00000027089	418.109	0.396605	0.0948895	4.17965	2.91963e-05	9.73054e-05	ENSRNOG00000027089	Ell2	elongation factor for RNA polymerase II 2 [Source:RGD Symbol;Acc:1309296]
ENSRNOG00000021157	2535.53	-0.072318	0.070779	-1.02174	0.306903	0.394	ENSRNOG00000021157	Ctss	cathepsin S [Source:RGD Symbol;Acc:621513]
ENSRNOG00000031247	48.8501	0.478947	0.231983	2.06458	0.0389628	0.067107	ENSRNOG00000031247	Lekr1	leucine, glutamate and lysine rich 1 [Source:RGD Symbol;Acc:1565425]
ENSRNOG00000060329	484.262	-0.0785188	0.0757916	-1.03598	0.30021	0.386639	ENSRNOG00000060329	Emb	embigin [Source:RGD Symbol;Acc:621067]
ENSRNOG00000015925	1212.77	0.260081	0.0692715	3.75452	0.000173671	0.00050478	ENSRNOG00000015925	Zfp131	zinc finger protein 131 [Source:RGD Symbol;Acc:1307638]
ENSRNOG00000062883	344.166	0.372196	0.105781	3.51857	0.000433876	0.00117259	ENSRNOG00000062883
ENSRNOG00000042536	822.907	0.556144	0.081489	6.82477	8.80667e-12	7.30335e-11	ENSRNOG00000042536	Pde4d	phosphodiesterase 4D [Source:RGD Symbol;Acc:3281]
ENSRNOG00000071119	76.2868	-0.180129	0.175462	-1.0266	0.304609	0.391404	ENSRNOG00000071119
ENSRNOG00000011107	52.1643	1.38102	0.352394	3.91897	8.89285e-05	0.000273355	ENSRNOG00000011107	Pcsk1	proprotein convertase subtilisin/kexin type 1 [Source:RGD Symbol;Acc:3272]
ENSRNOG00000021176	206.003	0.595228	0.130755	4.55224	5.30766e-06	2.00344e-05	ENSRNOG00000021176	Mtmr11	myotubularin related protein 11 [Source:RGD Symbol;Acc:1589965]
ENSRNOG00000020330	2377.11	0.0942401	0.0524323	1.79737	0.0722775	0.115081	ENSRNOG00000020330	Wdr47	WD repeat domain 47 [Source:RGD Symbol;Acc:1309181]
ENSRNOG00000017874	102.089	0.703402	0.147352	4.77362	1.80945e-06	7.33323e-06	ENSRNOG00000017874	Cd53	Cd53 molecule [Source:RGD Symbol;Acc:2310]
ENSRNOG00000040166	705.596	0.389728	0.0939728	4.14724	3.36509e-05	0.000111207	ENSRNOG00000040166	Ankrd34b	ankyrin repeat domain 34B [Source:RGD Symbol;Acc:1594383]
ENSRNOG00000021216	855.881	-0.188018	0.0564847	-3.32866	0.00087266	0.00221925	ENSRNOG00000021216	Pex11b	peroxisomal biogenesis factor 11 beta [Source:RGD Symbol;Acc:1310353]
ENSRNOG00000021209	457.619	-0.208291	0.113566	-1.8341	0.0666397	0.107293	ENSRNOG00000021209	Polr3gl	RNA polymerase III subunit GL [Source:RGD Symbol;Acc:1582857]
ENSRNOG00000063097	57.605	0.405488	0.196014	2.06867	0.0385768	0.0665448	ENSRNOG00000063097
ENSRNOG00000067563	22.4816	0.187629	0.403886	0.464559	0.642247	0.717233	ENSRNOG00000067563
ENSRNOG00000020315	683.175	0.0377967	0.0675975	0.559144	0.576063	0.659286	ENSRNOG00000020315	Taf13	TATA-box binding protein associated factor 13 [Source:RGD Symbol;Acc:1305398]
ENSRNOG00000033741	1041.16	-0.508208	0.0902626	-5.63033	1.79864e-08	9.78205e-08	ENSRNOG00000033741	Ankrd34a	ankyrin repeat domain 34A [Source:RGD Symbol;Acc:1308412]
ENSRNOG00000068985	111.677	0.132988	0.148136	0.897745	0.369321	0.458447	ENSRNOG00000068985
ENSRNOG00000013055	542.678	0.631448	0.0862288	7.32293	2.42606e-13	2.40634e-12	ENSRNOG00000013055	Zfyve16	zinc finger FYVE-type containing 16 [Source:RGD Symbol;Acc:1564784]
ENSRNOG00000021181	1264.87	-0.332756	0.0637706	-5.21802	1.8085e-07	8.46863e-07	ENSRNOG00000021181	Sf3b4	splicing factor 3B subunit 4 [Source:RGD Symbol;Acc:1309667]
ENSRNOG00000064070	57.8657	0.567245	0.210057	2.70044	0.00692487	0.0145165	ENSRNOG00000064070	Tmem267	transmembrane protein 267 [Source:RGD Symbol;Acc:1562550]
ENSRNOG00000070757	47.2432	-0.000370083	0.250389	-0.00147803	0.998821	0.999096	ENSRNOG00000070757
ENSRNOG00000067555	4805.55	0.180882	0.0528847	3.42031	0.000625502	0.00164011	ENSRNOG00000067555	Sub1	SUB1 regulator of transcription [Source:RGD Symbol;Acc:621582]
ENSRNOG00000019785	1407.23	0.114385	0.0568388	2.01245	0.044173	0.0748204	ENSRNOG00000019785	Phtf1	putative homeodomain transcription factor 1 [Source:RGD Symbol;Acc:620426]
ENSRNOG00000066880	704.917	0.142009	0.0893476	1.58939	0.111971	0.168386	ENSRNOG00000066880
ENSRNOG00000068330	137.678	0.704108	0.137214	5.13145	2.87514e-07	1.30306e-06	ENSRNOG00000068330
ENSRNOG00000068040	29.8843	1.64475	0.372161	4.41945	9.89546e-06	3.57443e-05	ENSRNOG00000068040
ENSRNOG00000021213	1017.65	0.137997	0.0704469	1.95888	0.0501265	0.083646	ENSRNOG00000021213	Lix1l	limb and CNS expressed 1 like [Source:RGD Symbol;Acc:1593161]
ENSRNOG00000016306	358.744	0.134765	0.108295	1.24443	0.213342	0.291297	ENSRNOG00000016306	Adgrv1	adhesion G protein-coupled receptor V1 [Source:RGD Symbol;Acc:1562101]
ENSRNOG00000013217	1733.47	0.620807	0.0681312	9.11193	8.09307e-20	1.6232e-18	ENSRNOG00000013217	Ttc33	tetratricopeptide repeat domain 33 [Source:RGD Symbol;Acc:1564042]
ENSRNOG00000021324	104.209	0.123614	0.164129	0.75315	0.45136	0.541714	ENSRNOG00000021324	C2h3orf33	similar to human chromosome 3 open reading frame 33 [Source:RGD Symbol;Acc:1565059]
ENSRNOG00000021201	920.825	-0.160474	0.107607	-1.49129	0.135885	0.198689	ENSRNOG00000021201	Txnip	thioredoxin interacting protein [Source:RGD Symbol;Acc:620886]
ENSRNOG00000011627	5920.1	0.494693	0.0404043	12.2436	1.8184e-34	1.39709e-32	ENSRNOG00000011627	Zfr	zinc finger RNA binding protein [Source:RGD Symbol;Acc:1311890]
ENSRNOG00000065416	55.6397	0.674465	0.199384	3.38274	0.000717666	0.00186226	ENSRNOG00000065416
ENSRNOG00000013240	70.4759	-1.35972	0.459544	-2.95884	0.00308801	0.00702286	ENSRNOG00000013240	Ptger4	prostaglandin E receptor 4 [Source:RGD Symbol;Acc:628641]
ENSRNOG00000063403	40.0239	0.946829	0.261589	3.61953	0.00029514	0.000821808	ENSRNOG00000063403
ENSRNOG00000020444	431.938	0.235082	0.0789806	2.97646	0.002916	0.00666297	ENSRNOG00000020444	Hcn3	hyperpolarization-activated cyclic nucleotide-gated potassium channel 3 [Source:RGD Symbol;Acc:620691]
ENSRNOG00000012957	832.349	0.388548	0.0586149	6.62883	3.38354e-11	2.63555e-10	ENSRNOG00000012957	Sh3glb1	SH3 domain -containing GRB2-like endophilin B1 [Source:RGD Symbol;Acc:1304859]
ENSRNOG00000031136	934.733	0.0875427	0.0776839	1.12691	0.259781	0.342997	ENSRNOG00000031136	Ntng1	netrin G1 [Source:RGD Symbol;Acc:1563465]
ENSRNOG00000048118	372.715	-0.0232976	0.105873	-0.220051	0.825831	0.868349	ENSRNOG00000048118	Ankra2	ankyrin repeat family A protein 2 [Source:RGD Symbol;Acc:11492057]
ENSRNOG00000010023	462.569	0.331247	0.0793621	4.17387	2.99467e-05	9.95777e-05	ENSRNOG00000010023	Slc33a1	solute carrier family 33 member 1 [Source:RGD Symbol;Acc:620653]
ENSRNOG00000062746	337.01	0.18809	0.0940829	1.99919	0.0455874	0.076947	ENSRNOG00000062746
ENSRNOG00000009899	1526.91	0.700677	0.0846261	8.27967	1.23517e-16	1.7918e-15	ENSRNOG00000009899	Skil	SKI-like proto-oncogene [Source:RGD Symbol;Acc:621399]
ENSRNOG00000040201	38.1179	-0.155895	0.273594	-0.569806	0.568809	0.653094	ENSRNOG00000040201	Atp6ap1l	ATPase H+ transporting accessory protein 1 like [Source:RGD Symbol;Acc:1564936]
ENSRNOG00000068448	346.338	0.172339	0.0855818	2.01373	0.0440377	0.0746175	ENSRNOG00000068448	Arl15	ADP-ribosylation factor like GTPase 15 [Source:RGD Symbol;Acc:1597407]
ENSRNOG00000048363	432.416	0.305092	0.112809	2.7045	0.00684074	0.0143671	ENSRNOG00000048363	Dnah5	dynein, axonemal, heavy chain 5 [Source:RGD Symbol;Acc:1560828]
ENSRNOG00000068328	62.1276	-0.0325385	0.312287	-0.104194	0.917015	0.939068	ENSRNOG00000068328	LOC120101245	small nucleolar RNA SNORA44 [Source:RGD Symbol;Acc:41123498]
ENSRNOG00000016298	368.107	1.19037	0.0898468	13.2489	4.57936e-40	5.40625e-38	ENSRNOG00000016298	Lysmd3	LysM domain containing 3 [Source:RGD Symbol;Acc:1308805]
ENSRNOG00000019465	1146.96	0.156767	0.0565472	2.77232	0.00556582	0.0119505	ENSRNOG00000019465	Gnai3	G protein subunit alpha i3 [Source:RGD Symbol;Acc:2714]
ENSRNOG00000051151	655.227	0.0117347	0.0721731	0.162591	0.87084	0.904485	ENSRNOG00000051151	Gmps	guanine monophosphate synthase [Source:RGD Symbol;Acc:1310063]
ENSRNOG00000020360	819.244	-0.0285167	0.0651597	-0.437643	0.661645	0.734232	ENSRNOG00000020360	Clcc1	chloride channel CLIC-like 1 [Source:RGD Symbol;Acc:708359]
ENSRNOG00000014867	124.335	0.239622	0.159373	1.50353	0.132703	0.194762	ENSRNOG00000014867	Synpo2	synaptopodin 2 [Source:RGD Symbol;Acc:1564779]
ENSRNOG00000018969	242.406	0.237085	0.143071	1.65712	0.0974957	0.149402	ENSRNOG00000018969	Gpatch4	G patch domain containing 4 [Source:RGD Symbol;Acc:1311086]
ENSRNOG00000011951	357.961	-0.208803	0.110477	-1.89002	0.0587556	0.0961341	ENSRNOG00000011951	Plk2	polo-like kinase 2 [Source:RGD Symbol;Acc:620760]
ENSRNOG00000019201	684.039	-0.504119	0.0693553	-7.26865	3.63107e-13	3.54109e-12	ENSRNOG00000019201	Naxe	NAD(P)HX epimerase [Source:RGD Symbol;Acc:1304699]
ENSRNOG00000009822	57.1934	0.229284	0.217768	1.05288	0.292395	0.378048	ENSRNOG00000009822	Tlr2	toll-like receptor 2 [Source:RGD Symbol;Acc:735138]
ENSRNOG00000012422	1970.78	0.267471	0.0877583	3.04782	0.0023051	0.00537621	ENSRNOG00000012422	Tnik	TRAF2 and NCK interacting kinase [Source:RGD Symbol;Acc:1561817]
ENSRNOG00000012149	80.362	-0.614992	0.156412	-3.93186	8.42894e-05	0.000259976	ENSRNOG00000012149	Gpsm2	G-protein signaling modulator 2 [Source:RGD Symbol;Acc:1560967]
ENSRNOG00000024461	154.261	-0.373516	0.132055	-2.82848	0.00467694	0.0102512	ENSRNOG00000024461	Marchf11	membrane associated ring-CH-type finger 11 [Source:RGD Symbol;Acc:1559945]
ENSRNOG00000050877	589.25	-0.151718	0.0778548	-1.94873	0.0513276	0.085395	ENSRNOG00000050877	Cetn3	centrin 3 [Source:RGD Symbol;Acc:620249]
ENSRNOG00000021170	2073.8	-0.364979	0.0871246	-4.18916	2.79988e-05	9.36366e-05	ENSRNOG00000021170	Plekho1	pleckstrin homology domain containing O1 [Source:RGD Symbol;Acc:1311487]
ENSRNOG00000024136	192.782	-0.156544	0.111217	-1.40756	0.159262	0.227063	ENSRNOG00000024136	Fam151b	family with sequence similarity 151, member B [Source:RGD Symbol;Acc:1561110]
ENSRNOG00000013703	274.303	-0.344468	0.122011	-2.82326	0.00475387	0.0104056	ENSRNOG00000013703	Siah2	siah E3 ubiquitin protein ligase 2 [Source:RGD Symbol;Acc:620778]
ENSRNOG00000061328	53.45	0.51841	0.225295	2.30103	0.0213899	0.0393767	ENSRNOG00000061328	Pag1	phosphoprotein membrane anchor with glycosphingolipid microdomains 1 [Source:RGD Symbol;Acc:620394]
ENSRNOG00000012183	675.216	-0.407818	0.0715013	-5.70365	1.17268e-08	6.53937e-08	ENSRNOG00000012183	Glrx	glutaredoxin [Source:RGD Symbol;Acc:70951]
ENSRNOG00000064517	37.3966	0.625549	0.34048	1.83725	0.0661723	0.106611	ENSRNOG00000064517	Amy1	amylase alpha 1 [Source:RGD Symbol;Acc:2113]
ENSRNOG00000030639	756.455	0.463563	0.0665833	6.96214	3.35136e-12	2.93164e-11	ENSRNOG00000030639	Usp13	ubiquitin specific peptidase 13 [Source:RGD Symbol;Acc:1306044]
ENSRNOG00000043329	573.737	0.462547	0.0810741	5.70524	1.16182e-08	6.48129e-08	ENSRNOG00000043329	Rnf180	ring finger protein 180 [Source:RGD Symbol;Acc:1595064]
ENSRNOG00000017310	640.083	1.0187	0.0991735	10.2719	9.43219e-25	3.08479e-23	ENSRNOG00000017310	Rnpc3	RNA-binding region (RNP1, RRM) containing 3 [Source:RGD Symbol;Acc:1582776]
ENSRNOG00000016591	811.717	0.241556	0.0755867	3.19574	0.00139471	0.00340037	ENSRNOG00000016591	Utp15	UTP15, small subunit processome component [Source:RGD Symbol;Acc:1310992]
ENSRNOG00000014051	1070.92	-0.0175311	0.0599566	-0.292397	0.769983	0.823034	ENSRNOG00000014051	Pgrmc2	progesterone receptor membrane component 2 [Source:RGD Symbol;Acc:1308804]
ENSRNOG00000063678	955.457	0.403591	0.0734938	5.4915	3.98537e-08	2.04855e-07	ENSRNOG00000063678	Mcl1	MCL1 apoptosis regulator, BCL2 family member [Source:RGD Symbol;Acc:620525]
ENSRNOG00000009949	57.8808	0.104218	0.210874	0.49422	0.62115	0.699095	ENSRNOG00000009949	Pcdh18	protocadherin 18 [Source:RGD Symbol;Acc:1305870]
[truncated: 12,523 more rows]

## Sheet: age_TG
ensembl_geneID	baseMean	log2FoldChange	lfcSE	stat	pvalue	padj	ensembl	rgd_symbol	description
ENSRNOG00000070901	3470.09	-0.0286309	0.0655778	-0.436595	0.662405	0.744323	ENSRNOG00000070901	Irgq	immunity-related GTPase Q [Source:RGD Symbol;Acc:1309409]
ENSRNOG00000018029	142.906	0.381175	0.15227	2.50328	0.0123047	0.0272622	ENSRNOG00000018029	Doc2g	double C2-like domains, gamma [Source:RGD Symbol;Acc:1307473]
ENSRNOG00000032625	280.684	-0.112402	0.11404	-0.985635	0.324312	0.429019	ENSRNOG00000032625	Zfp108	zinc finger protein 108 [Source:RGD Symbol;Acc:1564214]
ENSRNOG00000029315	107.701	0.315967	0.151212	2.08957	0.0366566	0.0702138	ENSRNOG00000029315	LOC690251	similar to SUMO/sentrin specific protease 5 [Source:RGD Symbol;Acc:1582860]
ENSRNOG00000016356	10744.5	0.012195	0.0466962	0.261156	0.793972	0.851213	ENSRNOG00000016356	Got1	glutamic-oxaloacetic transaminase 1 [Source:RGD Symbol;Acc:2721]
ENSRNOG00000015810	48.6043	0.149203	0.229791	0.6493	0.516145	0.615688	ENSRNOG00000015810	Trip13	thyroid hormone receptor interactor 13 [Source:RGD Symbol;Acc:1308516]
ENSRNOG00000017538	133.356	0.0582292	0.163949	0.355166	0.722465	0.794044	ENSRNOG00000017538	Lrrc27	leucine rich repeat containing 27 [Source:RGD Symbol;Acc:1559981]
ENSRNOG00000027204	985.488	-0.268018	0.0782961	-3.42313	0.000619051	0.00192283	ENSRNOG00000027204	Map6	microtubule-associated protein 6 [Source:RGD Symbol;Acc:61804]
ENSRNOG00000070886	993.132	0.172712	0.0727115	2.37531	0.0175344	0.0371	ENSRNOG00000070886
ENSRNOG00000014903	2216.66	-0.0531655	0.0514913	-1.03251	0.301832	0.404775	ENSRNOG00000014903	Zfyve27	zinc finger FYVE-type containing 27 [Source:RGD Symbol;Acc:735177]
ENSRNOG00000021051	1428.73	-0.215862	0.0625674	-3.45006	0.000560452	0.00175611	ENSRNOG00000021051	Cyth2	cytohesin 2 [Source:RGD Symbol;Acc:620398]
ENSRNOG00000011160	7935.91	0.0302606	0.0573322	0.527812	0.59763	0.689018	ENSRNOG00000011160	Sv2b	synaptic vesicle glycoprotein 2b [Source:RGD Symbol;Acc:619716]
ENSRNOG00000017748	60.1023	-0.745625	0.243405	-3.06331	0.00218905	0.00594488	ENSRNOG00000017748	Nkx6-2	NK6 homeobox 2 [Source:RGD Symbol;Acc:1307280]
ENSRNOG00000016227	1863.83	-0.234486	0.0483314	-4.85163	1.22448e-06	6.79429e-06	ENSRNOG00000016227	Glrx3	glutaredoxin 3 [Source:RGD Symbol;Acc:69414]
ENSRNOG00000016906	80.7318	-0.681407	0.195925	-3.4779	0.000505361	0.00160248	ENSRNOG00000016906	Lipt2	lipoyl(octanoyl) transferase 2 [Source:RGD Symbol;Acc:1305211]
ENSRNOG00000027582	5171.73	-0.481722	0.0744696	-6.4687	9.88495e-11	1.11444e-09	ENSRNOG00000027582	Dpysl4	dihydropyrimidinase-like 4 [Source:RGD Symbol;Acc:2409]
ENSRNOG00000009830	326.045	0.387364	0.102131	3.79282	0.000148947	0.000532588	ENSRNOG00000009830	Fam204a	family with sequence similarity 204, member A [Source:RGD Symbol;Acc:1305500]
ENSRNOG00000012742	87.6489	0.155037	0.170455	0.909549	0.36306	0.468414	ENSRNOG00000012742	Irx2	iroquois homeobox 2 [Source:RGD Symbol;Acc:1309834]
ENSRNOG00000013767	163.02	-0.310974	0.134153	-2.31806	0.0204459	0.0423861	ENSRNOG00000013767	Ccdc61	coiled-coil domain containing 61 [Source:RGD Symbol;Acc:1307390]
ENSRNOG00000032699	13850.5	-0.201795	0.0466323	-4.32736	1.5091e-05	6.72403e-05	ENSRNOG00000032699	Ttyh1	tweety family member 1 [Source:RGD Symbol;Acc:1310103]
ENSRNOG00000018408	849.061	-0.215533	0.0621944	-3.46547	0.000529304	0.00166825	ENSRNOG00000018408	RGD1307554	similar to CG16812-PA [Source:RGD Symbol;Acc:1307554]
ENSRNOG00000018334	147.086	-0.182248	0.140417	-1.29791	0.194317	0.284501	ENSRNOG00000018334	Ctu1	cytosolic thiouridylase subunit 1 [Source:RGD Symbol;Acc:1308740]
ENSRNOG00000067907	328.012	0.329706	0.130444	2.52756	0.0114858	0.0257027	ENSRNOG00000067907
ENSRNOG00000023407	304.807	-0.481014	0.100353	-4.79322	1.64124e-06	8.85967e-06	ENSRNOG00000023407	Mrpl36	mitochondrial ribosomal protein L36 [Source:RGD Symbol;Acc:1306375]
ENSRNOG00000010529	70.6329	1.11751	0.226413	4.93574	7.98487e-07	4.58112e-06	ENSRNOG00000010529	Thbs2	thrombospondin 2 [Source:RGD Symbol;Acc:1310979]
ENSRNOG00000012684	696.86	-0.332797	0.0732419	-4.5438	5.52488e-06	2.68138e-05	ENSRNOG00000012684	Bloc1s2	biogenesis of lysosomal organelles complex-1, subunit 2 [Source:RGD Symbol;Acc:1306551]
ENSRNOG00000014258	40.4727	0.682916	0.255249	2.67549	0.00746195	0.0175987	ENSRNOG00000014258	Rab32	RAB32, member RAS oncogene family [Source:RGD Symbol;Acc:1559997]
ENSRNOG00000010918	129.347	0.104228	0.147057	0.708757	0.478475	0.58166	ENSRNOG00000010918	Cebpa	CCAAT/enhancer binding protein alpha [Source:RGD Symbol;Acc:2326]
ENSRNOG00000067027	106.195	-0.343284	0.158403	-2.16715	0.0302233	0.0597105	ENSRNOG00000067027	LOC108349691	histone H3.3-like [Source:RGD Symbol;Acc:11381356]
ENSRNOG00000019416	1051.86	0.101719	0.0702616	1.44772	0.147696	0.227145	ENSRNOG00000019416	Zfp61	zinc finger protein 94 [Source:RGD Symbol;Acc:1560430]
ENSRNOG00000014946	1474.68	0.119312	0.0477787	2.49718	0.0125186	0.0277066	ENSRNOG00000014946	Thumpd1	THUMP domain containing 1 [Source:RGD Symbol;Acc:1308854]
ENSRNOG00000020318	616.029	-0.121306	0.0720472	-1.6837	0.0922394	0.153831	ENSRNOG00000020318	Pnkp	polynucleotide kinase 3'-phosphatase [Source:RGD Symbol;Acc:1303331]
ENSRNOG00000070104	26.8547	0.606107	0.313737	1.93189	0.0533726	0.0967086	ENSRNOG00000070104
ENSRNOG00000050445	3796.68	-0.252895	0.0509909	-4.95962	7.06325e-07	4.10058e-06	ENSRNOG00000050445	Gde1	glycerophosphodiester phosphodiesterase 1 [Source:RGD Symbol;Acc:621788]
ENSRNOG00000013945	682.471	-0.15157	0.0727995	-2.08202	0.0373403	0.0713539	ENSRNOG00000013945	Itpkc	inositol-trisphosphate 3-kinase C [Source:RGD Symbol;Acc:631336]
ENSRNOG00000065397	21.0314	0.852467	0.360075	2.36747	0.0179101	0.0378176	ENSRNOG00000065397	Rnu6-856	RNA, U6 small nuclear 856 [Source:RGD Symbol;Acc:41041613]
ENSRNOG00000031947	36.3474	-0.315516	0.257708	-1.22432	0.220833	0.315094	ENSRNOG00000031947	LOC100361060	ribosomal protein L36-like [Source:RGD Symbol;Acc:2320900]
ENSRNOG00000016565	108.259	-0.587581	0.169136	-3.47402	0.000512726	0.00162171	ENSRNOG00000016565	Zfp524	zinc finger protein 524 [Source:RGD Symbol;Acc:1565485]
ENSRNOG00000019138	184.916	-0.031217	0.144124	-0.216598	0.828522	0.877679	ENSRNOG00000019138	Clec11a	C-type lectin domain containing 11A [Source:RGD Symbol;Acc:3627]
ENSRNOG00000065728	38.5093	0.129205	0.276866	0.46667	0.640736	0.726998	ENSRNOG00000065728
ENSRNOG00000065649	379.883	0.0706391	0.0850783	0.830283	0.406379	0.511442	ENSRNOG00000065649	Zfp94	zinc finger protein 94 [Source:RGD Symbol;Acc:1560430]
ENSRNOG00000064423	220.117	2.65744	0.193188	13.7557	4.70426e-43	1.84623e-40	ENSRNOG00000064423	LOC685793	similar to serine/threonine kinase [Source:RGD Symbol;Acc:1590175]
ENSRNOG00000016574	606.882	-0.192549	0.0723602	-2.66098	0.00779146	0.0182681	ENSRNOG00000016574	Fiz1	FLT3-interacting zinc finger 1 [Source:RGD Symbol;Acc:1306359]
ENSRNOG00000055971	62.712	0.22431	0.203517	1.10217	0.270388	0.370966	ENSRNOG00000055971	AABR07000544.1
ENSRNOG00000055608	591.953	-0.176875	0.124286	-1.42312	0.1547	0.23624	ENSRNOG00000055608	LOC102548695	zinc finger protein 45-like [Source:RGD Symbol;Acc:7529325]
ENSRNOG00000020347	1965.48	0.207053	0.061628	3.35972	0.000780203	0.00236966	ENSRNOG00000020347	Nup98	nucleoporin 98 and 96 precursor [Source:RGD Symbol;Acc:71033]
ENSRNOG00000065259	29.5431	0.126102	0.288223	0.437515	0.661738	0.743897	ENSRNOG00000065259
ENSRNOG00000068222	101.772	3.86852	0.290997	13.294	2.50752e-40	7.43096e-38	ENSRNOG00000068222	LOC100910657	sperm motility kinase Y-like [Source:RGD Symbol;Acc:6497368]
ENSRNOG00000016608	170.653	-0.29551	0.137071	-2.1559	0.0310916	0.0611432	ENSRNOG00000016608	Zfp579	zinc finger protein 579 [Source:RGD Symbol;Acc:1308475]
ENSRNOG00000012730	128.66	-0.11364	0.137092	-0.828932	0.407143	0.512002	ENSRNOG00000012730	Lrrk1	leucine-rich repeat kinase 1 [Source:RGD Symbol;Acc:1308000]
ENSRNOG00000068539	59.5613	0.20632	0.215863	0.955791	0.339178	0.443992	ENSRNOG00000068539
ENSRNOG00000018117	3999.22	-0.398277	0.0524029	-7.6003	2.95448e-14	5.7279e-13	ENSRNOG00000018117	Ndufv1	NADH:ubiquinone oxidoreductase core subunit V1 [Source:RGD Symbol;Acc:1359247]
ENSRNOG00000068720	33.6526	0.161795	0.281996	0.573749	0.566138	0.661215	ENSRNOG00000068720
ENSRNOG00000016362	62.5042	-0.83296	0.230438	-3.61468	0.000300721	0.00100593	ENSRNOG00000016362	Gpr4	G protein-coupled receptor 4 [Source:RGD Symbol;Acc:1311604]
ENSRNOG00000017307	229.031	-0.0619178	0.129481	-0.478198	0.632509	0.719745	ENSRNOG00000017307	Prss23	serine protease 23 [Source:RGD Symbol;Acc:1359545]
ENSRNOG00000020942	23.2043	-0.357183	0.33342	-1.07127	0.284048	0.385823	ENSRNOG00000020942	Plekha4	pleckstrin homology domain containing A4 [Source:RGD Symbol;Acc:735133]
ENSRNOG00000017079	2779.61	0.0958771	0.0708958	1.35237	0.176258	0.262499	ENSRNOG00000017079	Pgm2l1	phosphoglucomutase 2-like 1 [Source:RGD Symbol;Acc:1583226]
ENSRNOG00000017795	735.009	-0.455794	0.110738	-4.11597	3.85549e-05	0.000156778	ENSRNOG00000017795	Hspbp1	HSPA (Hsp70) binding protein 1 [Source:RGD Symbol;Acc:628677]
ENSRNOG00000052607	93.2298	0.764047	0.168087	4.54554	5.47937e-06	2.66285e-05	ENSRNOG00000052607	Snora12	small nucleolar RNA, H/ACA box 12 [Source:RGD Symbol;Acc:41366654]
ENSRNOG00000052319	394.905	-0.10496	0.0911047	-1.15208	0.249287	0.347466	ENSRNOG00000052319	AABR07004881.1
ENSRNOG00000027542	91.2955	0.366898	0.17564	2.08893	0.0367144	0.0703152	ENSRNOG00000027542	LOC100302465	hypothetical LOC100302465 [Source:RGD Symbol;Acc:2311471]
ENSRNOG00000065457	1920.6	0.702485	0.102982	6.82142	9.01444e-12	1.20311e-10	ENSRNOG00000065457
ENSRNOG00000021478	2153.43	-0.167615	0.0637933	-2.62746	0.00860246	0.0199356	ENSRNOG00000021478	Tpd52l1	TPD52 like 1 [Source:RGD Symbol;Acc:1594796]
ENSRNOG00000018090	2920.56	-0.0865573	0.0564027	-1.53463	0.124875	0.197335	ENSRNOG00000018090	Ppp6r1	protein phosphatase 6, regulatory subunit 1 [Source:RGD Symbol;Acc:1311409]
ENSRNOG00000069157	132.813	-0.0295485	0.136076	-0.217147	0.828094	0.877565	ENSRNOG00000069157	Chchd4	coiled-coil-helix-coiled-coil-helix domain containing 4 [Source:RGD Symbol;Acc:1310746]
ENSRNOG00000070519	35.5141	1.88935	0.330341	5.71938	1.06913e-08	8.7415e-08	ENSRNOG00000070519
ENSRNOG00000015230	542.466	0.464027	0.0802103	5.78514	7.24536e-09	6.09912e-08	ENSRNOG00000015230	Ermard	ER membrane-associated RNA degradation [Source:RGD Symbol;Acc:1309374]
ENSRNOG00000017069	1170.52	-0.281352	0.0647557	-4.34482	1.39392e-05	6.26665e-05	ENSRNOG00000017069	Mark4	microtubule affinity regulating kinase 4 [Source:RGD Symbol;Acc:1591792]
ENSRNOG00000021013	954.947	0.720909	0.106854	6.74666	1.51289e-11	1.94242e-10	ENSRNOG00000021013	Stx3	syntaxin 3 [Source:RGD Symbol;Acc:621005]
ENSRNOG00000018677	2632.93	-0.121953	0.0535213	-2.27859	0.0226914	0.0464559	ENSRNOG00000018677	Akt2	AKT serine/threonine kinase 2 [Source:RGD Symbol;Acc:2082]
ENSRNOG00000019207	4998.32	-0.232363	0.0667876	-3.47914	0.000503028	0.00159591	ENSRNOG00000019207	Shank1	SH3 and multiple ankyrin repeat domains 1 [Source:RGD Symbol;Acc:621011]
ENSRNOG00000070234	564.593	0.690745	0.0870928	7.93114	2.17141e-15	5.0369e-14	ENSRNOG00000070234	Zfp141	zinc finger protein 141 [Source:RGD Symbol;Acc:1597345]
ENSRNOG00000063629	129.263	0.521201	0.153354	3.39869	0.000677104	0.00209063	ENSRNOG00000063629
ENSRNOG00000067256	329.348	3.57927	0.261587	13.6829	1.28419e-42	4.90731e-40	ENSRNOG00000067256
ENSRNOG00000015734	1547.65	0.955628	0.0703877	13.5766	5.50952e-42	1.81827e-39	ENSRNOG00000015734	Ube3a	ubiquitin protein ligase E3A [Source:RGD Symbol;Acc:1306361]
ENSRNOG00000068800	542.588	0.185046	0.100546	1.8404	0.065709	0.115432	ENSRNOG00000068800
ENSRNOG00000069276	412.738	0.532814	0.0954091	5.58452	2.34345e-08	1.77884e-07	ENSRNOG00000069276	LOC102548320	zinc finger protein 845-like [Source:RGD Symbol;Acc:7683572]
ENSRNOG00000062961	76.0947	1.07275	0.213013	5.03605	4.75225e-07	2.85272e-06	ENSRNOG00000062961
ENSRNOG00000054452	33.4013	1.03696	0.391053	2.6517	0.0080087	0.0186801	ENSRNOG00000054452	LOC120100374	small nucleolar RNA SNORA42/SNORA80 family [Source:RGD Symbol;Acc:41348685]
ENSRNOG00000049772	224.869	-0.326644	0.112819	-2.89529	0.0037881	0.00966222	ENSRNOG00000049772	Gemin7	gem (nuclear organelle) associated protein 7 [Source:RGD Symbol;Acc:1597035]
ENSRNOG00000053859	1159.28	0.278849	0.0598075	4.66245	3.12462e-06	1.59314e-05	ENSRNOG00000053859	Ranbp6	RAN binding protein 6 [Source:RGD Symbol;Acc:1305165]
ENSRNOG00000066647	22.8965	0.744242	0.342617	2.17223	0.0298384	0.0590465	ENSRNOG00000066647
ENSRNOG00000066887	98.5458	0.0319938	0.164097	0.194969	0.845417	0.890085	ENSRNOG00000066887	LOC102556805	rho GTPase-activating protein 20-like [Source:RGD Symbol;Acc:7734973]
ENSRNOG00000018915	21.728	0.339793	0.393032	0.864545	0.387289	0.492238	ENSRNOG00000018915	Tagap	T-cell activation RhoGTPase activating protein [Source:RGD Symbol;Acc:1308618]
ENSRNOG00000020358	2533.63	-0.287253	0.0688204	-4.17395	2.99367e-05	0.000124381	ENSRNOG00000020358	Ptov1	PTOV1, extended AT-hook containing adaptor protein [Source:RGD Symbol;Acc:1306977]
ENSRNOG00000064667	60.5573	0.361627	0.246703	1.46584	0.142692	0.22057	ENSRNOG00000064667	Tmem86b	transmembrane protein 86B [Source:RGD Symbol;Acc:1593455]
ENSRNOG00000053502	2409.53	-0.261311	0.0577102	-4.52798	5.95495e-06	2.86805e-05	ENSRNOG00000053502	Arhgef17	Rho guanine nucleotide exchange factor 17 [Source:RGD Symbol;Acc:1309890]
ENSRNOG00000021442	224.562	-0.210619	0.112498	-1.87219	0.0611797	0.108632	ENSRNOG00000021442	Hddc2	HD domain containing 2 [Source:RGD Symbol;Acc:1307562]
ENSRNOG00000066023	491.307	0.800594	0.0964244	8.30282	1.01672e-16	2.90626e-15	ENSRNOG00000066023
ENSRNOG00000014278	673.084	0.120169	0.0818706	1.46779	0.142161	0.219982	ENSRNOG00000014278	Zfp710	zinc finger protein 710 [Source:RGD Symbol;Acc:1306491]
ENSRNOG00000049605	22.9454	-0.601582	0.337288	-1.78359	0.0744908	0.128359	ENSRNOG00000049605	Zfp296	zinc finger protein 296 [Source:RGD Symbol;Acc:1595818]
ENSRNOG00000022921	297.625	-0.495661	0.129816	-3.81818	0.000134437	0.000485372	ENSRNOG00000022921	Dact2	dishevelled-binding antagonist of beta-catenin 2 [Source:RGD Symbol;Acc:1310742]
ENSRNOG00000037360	40.8999	-0.115081	0.250107	-0.460127	0.645425	0.731348	ENSRNOG00000037360	AABR07003173.1
ENSRNOG00000020624	2229.91	0.653883	0.0668113	9.78701	1.28032e-22	7.65082e-21	ENSRNOG00000020624	Acadsb	acyl-CoA dehydrogenase, short/branched chain [Source:RGD Symbol;Acc:2013]
ENSRNOG00000013981	237.989	-0.381735	0.439353	-0.868857	0.384925	0.489826	ENSRNOG00000013981	Ptpn5	protein tyrosine phosphatase, non-receptor type 5 [Source:RGD Symbol;Acc:3448]
ENSRNOG00000065346	72.3315	-0.198698	0.278827	-0.712621	0.476081	0.57938	ENSRNOG00000065346
ENSRNOG00000059083	62.0718	-0.132661	0.29512	-0.449515	0.65306	0.737467	ENSRNOG00000059083	LOC120100370	small nucleolar RNA SNORA44 [Source:RGD Symbol;Acc:41111402]
ENSRNOG00000030818	806.112	0.27642	0.0636683	4.34156	1.41473e-05	6.35032e-05	ENSRNOG00000030818	C1h11orf42	similar to human chromosome 11 open reading frame 42 [Source:RGD Symbol;Acc:1561034]
ENSRNOG00000064515	1356.84	0.163737	0.0646818	2.53142	0.0113601	0.0254529	ENSRNOG00000064515
ENSRNOG00000017930	1007.11	-0.0473796	0.0587353	-0.806662	0.419861	0.524637	ENSRNOG00000017930	Lpcat1	lysophosphatidylcholine acyltransferase 1 [Source:RGD Symbol;Acc:1311599]
ENSRNOG00000063371	273.744	-0.213497	0.103077	-2.07125	0.0383358	0.073016	ENSRNOG00000063371
ENSRNOG00000068809	263.139	0.073663	0.0994413	0.740769	0.458834	0.562635	ENSRNOG00000068809
ENSRNOG00000019869	373.975	-0.665636	0.104823	-6.35012	2.15153e-10	2.30571e-09	ENSRNOG00000019869	Lrfn1	leucine rich repeat and fibronectin type III domain containing 1 [Source:RGD Symbol;Acc:1304707]
ENSRNOG00000067318	214.637	-0.12806	0.123022	-1.04095	0.297898	0.400812	ENSRNOG00000067318
ENSRNOG00000023411	276.448	-0.190389	0.11219	-1.69703	0.0896917	0.150169	ENSRNOG00000023411	Vsig10l	V-set and immunoglobulin domain containing 10 like [Source:RGD Symbol;Acc:1564982]
ENSRNOG00000046005	75602.7	0.0631596	0.0579168	1.09052	0.275483	0.376427	ENSRNOG00000046005	Scd2	stearoyl-Coenzyme A desaturase 2 [Source:RGD Symbol;Acc:621177]
ENSRNOG00000018686	4264.74	0.197542	0.075514	2.61597	0.00889753	0.0205472	ENSRNOG00000018686	Atxn2l	ataxin 2-like [Source:RGD Symbol;Acc:1565868]
ENSRNOG00000063261	217.91	-0.341608	0.119867	-2.84988	0.00437356	0.0109876	ENSRNOG00000063261
ENSRNOG00000069563	30.4443	-0.0352558	0.286309	-0.123139	0.901997	0.9327	ENSRNOG00000069563
ENSRNOG00000017408	677.535	-0.0281006	0.0849505	-0.330789	0.740804	0.809239	ENSRNOG00000017408	Fhip1b	FHF complex subunit HOOK interacting protein 1B [Source:RGD Symbol;Acc:1359585]
ENSRNOG00000021794	173.801	-0.663255	0.15561	-4.26228	2.02353e-05	8.73215e-05	ENSRNOG00000021794	Znhit2	zinc finger, HIT-type containing 2 [Source:RGD Symbol;Acc:1307918]
ENSRNOG00000069938	25.9554	-0.347367	0.315679	-1.10038	0.271167	0.371859	ENSRNOG00000069938
ENSRNOG00000013949	1575.57	-0.0259461	0.0534697	-0.485249	0.627499	0.715502	ENSRNOG00000013949	Idh2	isocitrate dehydrogenase (NADP(+)) 2 [Source:RGD Symbol;Acc:1597139]
ENSRNOG00000065858	263.23	0.674577	0.133884	5.03853	4.69128e-07	2.81846e-06	ENSRNOG00000065858
ENSRNOG00000016103	86.7316	0.0590817	0.193101	0.305963	0.759633	0.823304	ENSRNOG00000016103	Nkd2	NKD inhibitor of WNT signaling pathway 2 [Source:RGD Symbol;Acc:1311459]
ENSRNOG00000020643	1058.01	-0.334362	0.0571288	-5.85277	4.83445e-09	4.19721e-08	ENSRNOG00000020643	Bub3	BUB3 mitotic checkpoint protein [Source:RGD Symbol;Acc:1306654]
ENSRNOG00000064778	40.1359	3.76038	0.458141	8.2079	2.25089e-16	6.1323e-15	ENSRNOG00000064778
ENSRNOG00000058790	2519.31	-0.0198006	0.0507737	-0.389978	0.696553	0.772582	ENSRNOG00000058790	Fam120b	family with sequence similarity 120B [Source:RGD Symbol;Acc:1310304]
ENSRNOG00000020371	110.006	-0.401211	0.14709	-2.72765	0.0063787	0.0153067	ENSRNOG00000020371	Pgap2	post-GPI attachment to proteins 2 [Source:RGD Symbol;Acc:619744]
ENSRNOG00000014996	191.766	-0.199295	0.126163	-1.57966	0.114184	0.183293	ENSRNOG00000014996	Katna1	katanin catalytic subunit A1 [Source:RGD Symbol;Acc:1303062]
ENSRNOG00000067296	804.082	0.396151	0.0644028	6.15114	7.69262e-10	7.61968e-09	ENSRNOG00000067296	LOC108348090	zinc finger protein OZF-like [Source:RGD Symbol;Acc:11436011]
ENSRNOG00000017914	76.3658	-0.933086	0.186474	-5.00385	5.61973e-07	3.31724e-06	ENSRNOG00000017914	Cavin3	caveolae associated protein 3 [Source:RGD Symbol;Acc:628755]
ENSRNOG00000070027	126.54	-0.00478799	0.154568	-0.0309767	0.975288	0.983688	ENSRNOG00000070027
ENSRNOG00000016812	59.4117	0.304996	0.305131	0.999556	0.317526	0.421924	ENSRNOG00000016812	Adamts16	ADAM metallopeptidase with thrombospondin type 1 motif, 16 [Source:RGD Symbol;Acc:1310046]
ENSRNOG00000009932	45.1562	0.884681	0.240661	3.67604	0.000236881	0.000811936	ENSRNOG00000009932	Mctp2	multiple C2 and transmembrane domain containing 2 [Source:RGD Symbol;Acc:1562967]
ENSRNOG00000020865	56.1254	-0.017134	0.24586	-0.0696903	0.94444	0.962131	ENSRNOG00000020865	Ano1	anoctamin 1 [Source:RGD Symbol;Acc:1310786]
ENSRNOG00000020714	66.0458	-0.136033	0.213024	-0.63858	0.523096	0.622256	ENSRNOG00000020714	Trpm4	transient receptor potential cation channel, subfamily M, member 4 [Source:RGD Symbol;Acc:620244]
ENSRNOG00000015825	1395.41	0.275705	0.0780452	3.53264	0.000411439	0.00132855	ENSRNOG00000015825	Aurkc	aurora kinase C [Source:RGD Symbol;Acc:1309573]
ENSRNOG00000014840	106.447	0.0749356	0.220797	0.339387	0.734318	0.804315	ENSRNOG00000014840	Gna14	G protein subunit alpha 14 [Source:RGD Symbol;Acc:1308122]
ENSRNOG00000064970	240.357	0.272361	0.110362	2.4679	0.013591	0.0297983	ENSRNOG00000064970	Zfp939	zinc finger protein 939 [Source:RGD Symbol;Acc:1584032]
ENSRNOG00000030127	1391.13	-0.0248587	0.0814349	-0.305258	0.76017	0.823701	ENSRNOG00000030127	Eml2	EMAP like 2 [Source:RGD Symbol;Acc:621066]
ENSRNOG00000066099	74.5321	0.0387176	0.929403	0.0416586	0.966771	0.978223	ENSRNOG00000066099
ENSRNOG00000027098	8164.16	-0.242112	0.0492624	-4.91474	8.89013e-07	5.05061e-06	ENSRNOG00000027098	Sez6l2	seizure related 6 homolog like 2 [Source:RGD Symbol;Acc:1565281]
ENSRNOG00000017311	854.494	-0.0185303	0.105461	-0.175708	0.860523	0.902148	ENSRNOG00000017311	Me3	malic enzyme 3 [Source:RGD Symbol;Acc:1311070]
ENSRNOG00000019270	31.0547	-0.450671	0.262922	-1.71409	0.0865128	0.145754	ENSRNOG00000019270	P2ry6	pyrimidinergic receptor P2Y6 [Source:RGD Symbol;Acc:620269]
ENSRNOG00000066986	368.307	0.238529	0.101376	2.35291	0.0186271	0.0391665	ENSRNOG00000066986	Zfp619	zinc finger protein 619 [Source:RGD Symbol;Acc:7710512]
ENSRNOG00000018762	74.0609	-0.160827	0.175597	-0.915891	0.359724	0.464892	ENSRNOG00000018762	Rsph3	radial spoke head 3 [Source:RGD Symbol;Acc:1311306]
ENSRNOG00000067989	203.652	3.30019	0.293968	11.2264	3.02663e-29	3.2316e-27	ENSRNOG00000067989
ENSRNOG00000015956	1525.32	-0.0277815	0.0648722	-0.42825	0.668469	0.749447	ENSRNOG00000015956	Usp29	ubiquitin specific peptidase 29 [Source:RGD Symbol;Acc:1306648]
ENSRNOG00000018019	3041.52	0.0486388	0.0404579	1.20221	0.229283	0.325043	ENSRNOG00000018019	Hspa12a	heat shock protein family A (Hsp70) member 12A [Source:RGD Symbol;Acc:1305531]
ENSRNOG00000069855	54.8271	2.85856	0.35623	8.02447	1.01964e-15	2.49682e-14	ENSRNOG00000069855
ENSRNOG00000016372	90.0774	-0.108167	0.169119	-0.639591	0.522439	0.621627	ENSRNOG00000016372	Slc12a7	solute carrier family 12 member 7 [Source:RGD Symbol;Acc:1359672]
ENSRNOG00000063775	69.9956	2.72008	0.293427	9.27005	1.86053e-20	8.52263e-19	ENSRNOG00000063775	LOC102546375	uncharacterized LOC102546375 [Source:RGD Symbol;Acc:7693175]
ENSRNOG00000064277	31.352	-0.033187	0.330907	-0.100291	0.920113	0.944772	ENSRNOG00000064277
ENSRNOG00000068327	447.533	-0.498749	0.0853647	-5.84256	5.14048e-09	4.44051e-08	ENSRNOG00000068327	Pdcd5	programmed cell death 5 [Source:RGD Symbol;Acc:1310561]
ENSRNOG00000019812	1139.48	-0.532924	0.114751	-4.64419	3.41409e-06	1.72378e-05	ENSRNOG00000019812	Nr1h2	nuclear receptor subfamily 1, group H, member 2 [Source:RGD Symbol;Acc:61906]
ENSRNOG00000070842	74.8287	0.190583	0.18303	1.04127	0.297752	0.400672	ENSRNOG00000070842
ENSRNOG00000025940	1139.5	-0.0967451	0.0710826	-1.36102	0.173507	0.259074	ENSRNOG00000025940	Mettl9	methyltransferase like 9 [Source:RGD Symbol;Acc:2311609]
ENSRNOG00000020393	696.124	-0.224766	0.0926862	-2.42502	0.0153075	0.0329939	ENSRNOG00000020393	Rhog	ras homolog family member G [Source:RGD Symbol;Acc:621310]
ENSRNOG00000067076	322.12	-0.42307	0.0936806	-4.51608	6.29936e-06	3.01792e-05	ENSRNOG00000067076	Frat1	FRAT regulator of WNT signaling pathway 1 [Source:RGD Symbol;Acc:9147096]
ENSRNOG00000014969	721.178	-0.403007	0.0940421	-4.28539	1.82423e-05	7.97881e-05	ENSRNOG00000014969	Lzts2	leucine zipper tumor suppressor 2 [Source:RGD Symbol;Acc:1359249]
ENSRNOG00000067278	365.844	0.108967	0.0950172	1.14681	0.25146	0.349803	ENSRNOG00000067278	LOC108349532	high mobility group protein B1 pseudogene [Source:RGD Symbol;Acc:11382437]
ENSRNOG00000010308	162.02	0.159918	0.185891	0.860276	0.389637	0.49479	ENSRNOG00000010308	Nr2f2	nuclear receptor subfamily 2, group F, member 2 [Source:RGD Symbol;Acc:69305]
ENSRNOG00000017277	23.2389	0.977823	0.339728	2.87825	0.00399885	0.0101481	ENSRNOG00000017277	Igsf6	immunoglobulin superfamily, member 6 [Source:RGD Symbol;Acc:620663]
ENSRNOG00000013426	1129.17	-0.11521	0.0960749	-1.19917	0.230461	0.326456	ENSRNOG00000013426	Mrgprf	MAS related GPR family member F [Source:RGD Symbol;Acc:708478]
ENSRNOG00000017851	118.56	-0.338011	0.14217	-2.37751	0.0174298	0.0369108	ENSRNOG00000017851	Etfb	electron transfer flavoprotein subunit beta [Source:RGD Symbol;Acc:1303312]
ENSRNOG00000068788	23.0338	-0.0251854	0.366598	-0.0687004	0.945228	0.962529	ENSRNOG00000068788
ENSRNOG00000011439	450.115	0.154372	0.110006	1.4033	0.160528	0.243373	ENSRNOG00000011439	Grk5	G protein-coupled receptor kinase 5 [Source:RGD Symbol;Acc:61985]
ENSRNOG00000017635	6488.15	-0.204418	0.0789008	-2.59083	0.00957454	0.0219155	ENSRNOG00000017635	Inpp5a	inositol polyphosphate-5-phosphatase A [Source:RGD Symbol;Acc:1306168]
ENSRNOG00000056397	49.1382	0.45826	0.232354	1.97225	0.0485814	0.0892863	ENSRNOG00000056397	LOC120100233	small nucleolar RNA SNORD22 [Source:RGD Symbol;Acc:40941034]
ENSRNOG00000068081	434.148	0.327824	0.0998228	3.28406	0.00102323	0.00301629	ENSRNOG00000068081
ENSRNOG00000065098	1309.73	0.100697	0.0621223	1.62094	0.10503	0.171076	ENSRNOG00000065098	Hmgb1-ps4	high-mobility group box 1, pseudogene 4 [Source:RGD Symbol;Acc:1596834]
ENSRNOG00000029394	1277.64	-0.21826	0.0679638	-3.21142	0.00132081	0.00378592	ENSRNOG00000029394	Dusp8	dual specificity phosphatase 8 [Source:RGD Symbol;Acc:1306425]
ENSRNOG00000017884	48.1841	-0.253896	0.206203	-1.23129	0.218214	0.31237	ENSRNOG00000017884	Dnajb6-ps10	DnaJ heat shock protein family (Hsp40) member B6, pseudogene 10 [Source:RGD Symbol;Acc:1583989]
ENSRNOG00000064417	138.744	0.209405	0.1529	1.36955	0.170827	0.256047	ENSRNOG00000064417
ENSRNOG00000021082	1308.66	-0.259034	0.0619933	-4.17842	2.93544e-05	0.000122066	ENSRNOG00000021082	Kdelr1	KDEL endoplasmic reticulum protein retention receptor 1 [Source:RGD Symbol;Acc:1306764]
ENSRNOG00000066269	160.032	0.974702	0.151926	6.41562	1.40253e-10	1.54056e-09	ENSRNOG00000066269
ENSRNOG00000020197	65.4278	-0.570865	0.216302	-2.6392	0.00831013	0.0193353	ENSRNOG00000020197	Cd248	endosialin [Source:RGD Symbol;Acc:11367424]
ENSRNOG00000016687	85.9876	0.0917172	0.208014	0.440919	0.659272	0.741885	ENSRNOG00000016687	Ssc5d	scavenger receptor cysteine rich family member with 5 domains [Source:RGD Symbol;Acc:1565772]
ENSRNOG00000059984	91.4627	0.0431594	0.174708	0.247037	0.804879	0.859323	ENSRNOG00000059984	Dll1	delta like canonical Notch ligand 1 [Source:RGD Symbol;Acc:70949]
ENSRNOG00000055124	24.674	0.900451	0.34801	2.58743	0.00966956	0.0220982	ENSRNOG00000055124	AABR07001942.1
ENSRNOG00000020363	1200.75	-0.293656	0.0842342	-3.48619	0.000489953	0.00155954	ENSRNOG00000020363	Med25	mediator complex subunit 25 [Source:RGD Symbol;Acc:1305137]
ENSRNOG00000020871	201.623	-0.17319	0.148696	-1.16472	0.244131	0.341623	ENSRNOG00000020871	Ltbp4	latent transforming growth factor beta binding protein 4 [Source:RGD Symbol;Acc:1307033]
ENSRNOG00000033843	25.084	-0.275236	0.333069	-0.826363	0.408598	0.513387	ENSRNOG00000033843	AABR07007121.1
ENSRNOG00000021151	410.545	-0.371215	0.0809391	-4.58634	4.51077e-06	2.22414e-05	ENSRNOG00000021151	Ppp1r14b	protein phosphatase 1, regulatory (inhibitor) subunit 14B [Source:RGD Symbol;Acc:628702]
ENSRNOG00000018310	76.6312	0.77301	0.218309	3.5409	0.000398772	0.00129311	ENSRNOG00000018310	Eno4	enolase 4 [Source:RGD Symbol;Acc:1308333]
ENSRNOG00000030404	819.196	0.107237	0.0880603	1.21777	0.223311	0.317912	ENSRNOG00000030404	Arrb1	arrestin, beta 1 [Source:RGD Symbol;Acc:2156]
ENSRNOG00000067564	472.447	0.593598	0.0828664	7.16331	7.87542e-13	1.22309e-11	ENSRNOG00000067564
ENSRNOG00000014004	2004.48	0.159482	0.0537035	2.96968	0.00298114	0.00783088	ENSRNOG00000014004	Ncoa7	nuclear receptor coactivator 7 [Source:RGD Symbol;Acc:1566426]
ENSRNOG00000047816	563.735	-0.290365	0.0787906	-3.68527	0.000228459	0.000786314	ENSRNOG00000047816	Ccs	copper chaperone for superoxide dismutase [Source:RGD Symbol;Acc:620403]
ENSRNOG00000018433	287.348	-0.472783	0.0880804	-5.36763	7.97779e-08	5.5349e-07	ENSRNOG00000018433	Hps6	HPS6, biogenesis of lysosomal organelles complex 2 subunit 3 [Source:RGD Symbol;Acc:631341]
ENSRNOG00000020925	419.829	-0.148664	0.0757654	-1.96216	0.0497437	0.0910536	ENSRNOG00000020925	Ccdc86	coiled-coil domain containing 86 [Source:RGD Symbol;Acc:1359280]
ENSRNOG00000064594	251.825	0.782362	0.130925	5.97566	2.29165e-09	2.08372e-08	ENSRNOG00000064594
ENSRNOG00000070917	29.1228	0.695903	0.334189	2.08236	0.0373094	0.0713136	ENSRNOG00000070917	LOC102556098	zinc finger protein 729-like [Source:RGD Symbol;Acc:7732163]
ENSRNOG00000012140	284.322	-0.0622554	0.115704	-0.538056	0.590539	0.68236	ENSRNOG00000012140	Cep89	centrosomal protein 89 [Source:RGD Symbol;Acc:1311730]
ENSRNOG00000014828	407.197	-0.394514	0.0924025	-4.26952	1.95893e-05	8.47352e-05	ENSRNOG00000014828	Avpi1	arginine vasopressin-induced 1 [Source:RGD Symbol;Acc:621721]
ENSRNOG00000020497	2637.99	0.347454	0.0580626	5.98413	2.17548e-09	1.99481e-08	ENSRNOG00000020497	Plekha1	pleckstrin homology domain containing A1 [Source:RGD Symbol;Acc:1564153]
ENSRNOG00000070030	57.3799	0.0624321	0.219001	0.285077	0.775585	0.836433	ENSRNOG00000070030
ENSRNOG00000025154	599.938	-0.128442	0.0707323	-1.81589	0.0693873	0.12087	ENSRNOG00000025154	Snu13	NHP2 non-histone chromosome protein 2-like 1-like [Source:RGD Symbol;Acc:2323620]
ENSRNOG00000014448	1102.93	-0.0867442	0.110965	-0.781726	0.434376	0.538924	ENSRNOG00000014448	Bmal1	basic helix-loop-helix ARNT like 1 [Source:RGD Symbol;Acc:62003]
ENSRNOG00000015753	4691.49	-0.557033	0.0709151	-7.85493	4.00003e-15	8.81402e-14	ENSRNOG00000015753	Epn1	Epsin 1 [Source:RGD Symbol;Acc:619772]
ENSRNOG00000067461	31.4515	0.144724	0.281468	0.514174	0.60713	0.697825	ENSRNOG00000067461	Rps12l2	ribosomal protein S12-like 2 [Source:RGD Symbol;Acc:2321899]
ENSRNOG00000028781	76.4976	0.154533	0.193591	0.798249	0.424726	0.529349	ENSRNOG00000028781	Abcc6	ATP binding cassette subfamily C member 6 [Source:RGD Symbol;Acc:620268]
ENSRNOG00000064885	198.348	0.303256	0.13822	2.19401	0.0282347	0.0563413	ENSRNOG00000064885
ENSRNOG00000054561	22.8819	0.565896	0.354057	1.59832	0.109971	0.177848	ENSRNOG00000054561	Isg20	interferon stimulated exonuclease gene 20 [Source:RGD Symbol;Acc:1306407]
ENSRNOG00000065383	75.4634	0.190836	0.198926	0.959328	0.337394	0.442334	ENSRNOG00000065383
ENSRNOG00000063169	19.2612	0.306479	0.374879	0.81754	0.41362	0.5184	ENSRNOG00000063169	LOC102548076	zinc finger protein 120-like [Source:RGD Symbol;Acc:7716527]
ENSRNOG00000069489	45.0409	0.769596	0.230702	3.33588	0.000850294	0.00255846	ENSRNOG00000069489
ENSRNOG00000019491	1185.99	-0.535261	0.0689276	-7.76555	8.12903e-15	1.68872e-13	ENSRNOG00000019491	Stard10	StAR-related lipid transfer domain containing 10 [Source:RGD Symbol;Acc:1306548]
ENSRNOG00000019626	32.1158	0.103538	0.294063	0.352094	0.724768	0.796033	ENSRNOG00000019626	Slc27a5	solute carrier family 27 member 5 [Source:RGD Symbol;Acc:708535]
ENSRNOG00000064994	21.0281	0.0517567	0.317776	0.162872	0.870619	0.909515	ENSRNOG00000064994
ENSRNOG00000031381	145.883	-0.380126	0.152969	-2.48499	0.0129556	0.0285582	ENSRNOG00000031381	RGD1561333	similar to 60S ribosomal protein L8 [Source:RGD Symbol;Acc:1561333]
ENSRNOG00000021153	1436.19	-0.415859	0.0612585	-6.78858	1.13242e-11	1.48276e-10	ENSRNOG00000021153	Fkbp2	FKBP prolyl isomerase 2 [Source:RGD Symbol;Acc:1560660]
ENSRNOG00000037137	799.654	0.161413	0.0739985	2.1813	0.0291611	0.0579511	ENSRNOG00000037137	Svip	small VCP interacting protein [Source:RGD Symbol;Acc:1565432]
ENSRNOG00000014380	712.772	0.345587	0.0921166	3.75162	0.000175696	0.000620447	ENSRNOG00000014380	LOC102555672	zinc finger protein 850-like [Source:RGD Symbol;Acc:7701959]
ENSRNOG00000017150	285.368	-0.28763	0.108078	-2.66133	0.00778328	0.0182565	ENSRNOG00000017150	Med10	mediator complex subunit 10 [Source:RGD Symbol;Acc:1310128]
ENSRNOG00000063014	32.7919	0.556363	0.285673	1.94755	0.0514688	0.0937857	ENSRNOG00000063014
ENSRNOG00000020517	37.0444	-0.352474	0.257256	-1.37013	0.170646	0.255903	ENSRNOG00000020517	Prrg2	proline rich and Gla domain 2 [Source:RGD Symbol;Acc:1305444]
ENSRNOG00000062805	186.165	0.106043	0.137805	0.769513	0.441589	0.546101	ENSRNOG00000062805	Or14c39	olfactory receptor family 14 subfamily C member 39 [Source:RGD Symbol;Acc:1333763]
ENSRNOG00000015717	408.932	0.126705	0.104559	1.21181	0.225586	0.320554	ENSRNOG00000015717	Ptpre	protein tyrosine phosphatase, receptor type, E [Source:RGD Symbol;Acc:620771]
ENSRNOG00000015914	3253.14	-0.103114	0.0399876	-2.57864	0.0099191	0.0225902	ENSRNOG00000015914	U2af2	U2 small nuclear RNA auxiliary factor 2 [Source:RGD Symbol;Acc:1310690]
ENSRNOG00000019141	27.9757	0.137767	0.346067	0.398092	0.690562	0.76752	ENSRNOG00000019141	Ch25h	cholesterol 25-hydroxylase [Source:RGD Symbol;Acc:1310575]
ENSRNOG00000067799	177.046	0.310076	0.140978	2.19947	0.0278447	0.055667	ENSRNOG00000067799	Selenow	selenoprotein W [Source:RGD Symbol;Acc:3661]
ENSRNOG00000019582	2148.72	-0.0710761	0.0672452	-1.05697	0.290526	0.392732	ENSRNOG00000019582	Mthfd1l	methylenetetrahydrofolate dehydrogenase (NADP+ dependent) 1-like [Source:RGD Symbol;Acc:1307311]
ENSRNOG00000036711	243.753	-0.0829432	0.171057	-0.484887	0.627756	0.715683	ENSRNOG00000036711	Spn	sialophorin [Source:RGD Symbol;Acc:3750]
ENSRNOG00000013149	684.355	-0.0844721	0.0835387	-1.01117	0.311934	0.415749	ENSRNOG00000013149	Vps33b	VPS33B, late endosome and lysosome associated [Source:RGD Symbol;Acc:620644]
ENSRNOG00000018048	1325.71	-0.168687	0.0557074	-3.02809	0.00246106	0.0066143	ENSRNOG00000018048	Dctn5	dynactin subunit 5 [Source:RGD Symbol;Acc:1305654]
ENSRNOG00000010224	798.454	0.794247	0.0944084	8.41288	4.00061e-17	1.2354e-15	ENSRNOG00000010224	Rab30	RAB30, member RAS oncogene family [Source:RGD Symbol;Acc:1309507]
ENSRNOG00000063596	39.0018	0.113443	0.255181	0.444559	0.656639	0.739954	ENSRNOG00000063596
ENSRNOG00000029043	1241.85	0.0752428	0.0603144	1.24751	0.212211	0.305494	ENSRNOG00000029043	Zfp790	zinc finger protein 790 [Source:RGD Symbol;Acc:1309815]
ENSRNOG00000017095	84.7779	0.702193	0.16166	4.34363	1.40148e-05	6.29864e-05	ENSRNOG00000017095	Dlat-ps1	dihydrolipoamide S-acetyltransferase, pseudogene 1 [Source:RGD Symbol;Acc:1583609]
ENSRNOG00000018421	145.296	-0.12935	0.132097	-0.979205	0.327479	0.432223	ENSRNOG00000018421	Aen	apoptosis enhancing nuclease [Source:RGD Symbol;Acc:1305051]
ENSRNOG00000019681	305.483	-0.222568	0.107254	-2.07515	0.0379729	0.0723818	ENSRNOG00000019681	Pold1	DNA polymerase delta 1, catalytic subunit [Source:RGD Symbol;Acc:621839]
ENSRNOG00000020202	1637.93	-0.22645	0.0578797	-3.91243	9.13713e-05	0.000342136	ENSRNOG00000020202	Asrgl1	asparaginase and isoaspartyl peptidase 1 [Source:RGD Symbol;Acc:708526]
ENSRNOG00000017613	1090.21	0.0323361	0.0579277	0.558215	0.576698	0.670639	ENSRNOG00000017613	Tent4a	terminal nucleotidyltransferase 4A [Source:RGD Symbol;Acc:1307356]
ENSRNOG00000055519	229.394	-0.135314	0.111223	-1.2166	0.223758	0.318392	ENSRNOG00000055519	Zfp790	zinc finger protein 790 [Source:RGD Symbol;Acc:1309815]
ENSRNOG00000011234	41.1941	0.0587471	0.247941	0.236939	0.812704	0.865767	ENSRNOG00000011234	Taf5l-ps1	TATA-box binding protein associated factor 5 like, pseudogene 1 [Source:RGD Symbol;Acc:1582831]
ENSRNOG00000015997	303.067	-0.346799	0.113627	-3.05208	0.00227258	0.00615101	ENSRNOG00000015997	Ccdc106	coiled-coil domain containing 106 [Source:RGD Symbol;Acc:1566222]
ENSRNOG00000064983	45.7058	-0.237993	0.210955	-1.12817	0.259247	0.358594	ENSRNOG00000064983
ENSRNOG00000055020	179.513	0.254172	0.157029	1.61863	0.105526	0.171749	ENSRNOG00000055020	LOC679731	hypothetical protein LOC679731 [Source:RGD Symbol;Acc:1584810]
ENSRNOG00000066969	176.183	-0.0756896	0.126732	-0.597243	0.550345	0.647457	ENSRNOG00000066969	Zfp790	zinc finger protein 420-like [Source:RGD Symbol;Acc:150344952]
ENSRNOG00000014251	918.443	0.00036001	0.0697514	0.00516133	0.995882	0.997292	ENSRNOG00000014251	Capn5	calpain 5 [Source:RGD Symbol;Acc:620084]
ENSRNOG00000066794	192.245	-0.0594876	0.121046	-0.491447	0.623111	0.711783	ENSRNOG00000066794
ENSRNOG00000025539	1926.24	0.792344	0.0787901	10.0564	8.61011e-24	5.86983e-22	ENSRNOG00000025539	Vps13a	vacuolar protein sorting 13 homolog A [Source:RGD Symbol;Acc:1311340]
ENSRNOG00000066862	29.7064	0.390591	0.260825	1.49752	0.134258	0.209825	ENSRNOG00000066862
ENSRNOG00000012716	2869.91	0.249297	0.0628802	3.96463	7.35086e-05	0.000282311	ENSRNOG00000012716	Chd2	chromodomain helicase DNA binding protein 2 [Source:RGD Symbol;Acc:1310056]
ENSRNOG00000063182	493.665	-0.167239	0.0798547	-2.09429	0.036234	0.0695326	ENSRNOG00000063182
ENSRNOG00000016011	147.082	0.389486	0.140719	2.76782	0.00564333	0.0137218	ENSRNOG00000016011	Plekhg1	pleckstrin homology and RhoGEF domain containing G1 [Source:RGD Symbol;Acc:1583676]
ENSRNOG00000020014	1339.66	-0.187945	0.101515	-1.8514	0.0641126	0.113203	ENSRNOG00000020014	Myh14	myosin heavy chain 14 [Source:RGD Symbol;Acc:1306821]
ENSRNOG00000055082	3404.61	-0.368456	0.0379328	-9.7134	2.64367e-22	1.51137e-20	ENSRNOG00000055082	Maz	MYC associated zinc finger protein [Source:RGD Symbol;Acc:1594632]
ENSRNOG00000017960	1499.88	-0.16817	0.0629089	-2.67323	0.00751244	0.0176948	ENSRNOG00000017960	Deaf1	DEAF1 transcription factor [Source:RGD Symbol;Acc:620671]
ENSRNOG00000056062	173.165	0.162054	0.148379	1.09216	0.274762	0.375583	ENSRNOG00000056062	LOC100912787	zinc finger protein 850-like [Source:RGD Symbol;Acc:6485475]
ENSRNOG00000052256	677.782	-0.306147	0.0730609	-4.19031	2.78578e-05	0.000116443	ENSRNOG00000052256	Dact3	dishevelled-binding antagonist of beta-catenin 3 [Source:RGD Symbol;Acc:1563892]
ENSRNOG00000011931	5853.24	0.0246455	0.0522594	0.471599	0.637213	0.724076	ENSRNOG00000011931	Smarca2	SWI/SNF related, matrix associated, actin dependent regulator of chromatin, subfamily a, member 2 [Source:RGD Symbol;Acc:1302988]
ENSRNOG00000037556	486.287	-0.00393393	0.0810544	-0.0485344	0.96129	0.974756	ENSRNOG00000037556	Zfp420	zinc finger protein 420 [Source:RGD Symbol;Acc:2323829]
ENSRNOG00000052236	37.1844	0.112748	0.268179	0.42042	0.674179	0.753638	ENSRNOG00000052236	AABR07004992.1
ENSRNOG00000070848	437.728	0.0535083	0.0867012	0.617157	0.537131	0.635567	ENSRNOG00000070848	Zfp27	zinc finger protein 27 [Source:RGD Symbol;Acc:2318958]
ENSRNOG00000013160	940.995	0.35896	0.124665	2.87941	0.00398424	0.0101128	ENSRNOG00000013160	Sash1	SAM and SH3 domain containing 1 [Source:RGD Symbol;Acc:1566017]
ENSRNOG00000024077	154.671	0.271819	0.159659	1.7025	0.0886624	0.148806	ENSRNOG00000024077	Fbxo5	F-box protein 5 [Source:RGD Symbol;Acc:1309405]
ENSRNOG00000069496	74.0447	0.167256	0.201953	0.828191	0.407562	0.512266	ENSRNOG00000069496
ENSRNOG00000020456	339.466	0.0252593	0.10963	0.230406	0.817777	0.86964	ENSRNOG00000020456	Nucb2	nucleobindin 2 [Source:RGD Symbol;Acc:620888]
ENSRNOG00000019802	294.297	-0.642779	0.114889	-5.59477	2.20916e-08	1.68395e-07	ENSRNOG00000019802	Zfp428	zinc finger protein 428 [Source:RGD Symbol;Acc:1564862]
ENSRNOG00000065781	107.595	0.29172	0.945272	0.308609	0.757619	0.822041	ENSRNOG00000065781
ENSRNOG00000062668	23.2381	-0.274764	0.356106	-0.771579	0.440364	0.544957	ENSRNOG00000062668
ENSRNOG00000012806	1985.42	0.215111	0.0561279	3.83252	0.000126837	0.000459415	ENSRNOG00000012806	Rbbp6	RB binding protein 6, ubiquitin ligase [Source:RGD Symbol;Acc:1311964]
ENSRNOG00000070914	31.1355	-0.106746	0.286114	-0.373088	0.709083	0.783064	ENSRNOG00000070914	Tmem238	transmembrane protein 238 [Source:RGD Symbol;Acc:1565210]
ENSRNOG00000019497	1587.74	-0.346567	0.0596055	-5.81434	6.08749e-09	5.1815e-08	ENSRNOG00000019497	Mrpl17	mitochondrial ribosomal protein L17 [Source:RGD Symbol;Acc:70943]
ENSRNOG00000045545	63.9618	-0.208046	0.223746	-0.92983	0.352459	0.457296	ENSRNOG00000045545	Eid2b	EP300 interacting inhibitor of differentiation 2B [Source:RGD Symbol;Acc:9381183]
ENSRNOG00000064214	1295.44	0.65357	0.0587066	11.1328	8.68593e-29	8.94527e-27	ENSRNOG00000064214
ENSRNOG00000037331	76.1308	0.498757	0.186639	2.67231	0.00753301	0.0177346	ENSRNOG00000037331	Cd33	CD33 molecule [Source:RGD Symbol;Acc:1596020]
ENSRNOG00000062784	85.0291	0.217392	0.184271	1.17974	0.238106	0.335194	ENSRNOG00000062784
ENSRNOG00000020774	823.881	0.461842	0.0647037	7.1378	9.48353e-13	1.45725e-11	ENSRNOG00000020774	Zfp420	zinc finger protein 383-like [Source:RGD Symbol;Acc:9160828]
ENSRNOG00000037897	3796.26	-0.416962	0.0447121	-9.32549	1.10471e-20	5.22525e-19	ENSRNOG00000037897	Rps19	ribosomal protein S19 [Source:RGD Symbol;Acc:68440]
ENSRNOG00000016831	572.421	-0.613744	0.147446	-4.16249	3.14798e-05	0.000130176	ENSRNOG00000016831	Serpinh1	serpin family H member 1 [Source:RGD Symbol;Acc:69302]
ENSRNOG00000024280	51.926	0.61101	0.214964	2.84238	0.00447776	0.0112203	ENSRNOG00000024280	Ccdc170	coiled-coil domain containing 170 [Source:RGD Symbol;Acc:1310945]
ENSRNOG00000055683	40.5309	-0.614724	0.259007	-2.37339	0.0176258	0.0372825	ENSRNOG00000055683	Cct7-ps1	chaperonin containing Tcp1, subunit 7 (eta), pseudogene 1 [Source:RGD Symbol;Acc:1562884]
ENSRNOG00000056228	447.907	0.257556	0.105197	2.44833	0.014352	0.0312077	ENSRNOG00000056228	Atp10a	ATPase phospholipid transporting 10A (putative) [Source:RGD Symbol;Acc:1306150]
ENSRNOG00000028743	907.204	-0.696765	0.099223	-7.02221	2.18381e-12	3.18384e-11	ENSRNOG00000028743	Gal3st3	galactose-3-O-sulfotransferase 3 [Source:RGD Symbol;Acc:1564991]
ENSRNOG00000067556	54.2964	-0.212298	0.244782	-0.867294	0.385781	0.490579	ENSRNOG00000067556
ENSRNOG00000028273	250.25	-0.258891	0.104277	-2.48274	0.0130377	0.0287241	ENSRNOG00000028273	Tmem150b	transmembrane protein 150B [Source:RGD Symbol;Acc:1306181]
ENSRNOG00000023233	384.062	-0.0535967	0.095023	-0.564039	0.572728	0.667034	ENSRNOG00000023233	Zfp658	zinc finger protein 658 [Source:RGD Symbol;Acc:7541917]
ENSRNOG00000034075	1470.43	-0.231572	0.0676579	-3.42269	0.000620043	0.0019255	ENSRNOG00000034075	Ube2ql1	ubiquitin-conjugating enzyme E2Q family-like 1 [Source:RGD Symbol;Acc:1598121]
ENSRNOG00000014341	1016.24	-0.0270546	0.060933	-0.444006	0.657038	0.740347	ENSRNOG00000014341	Btbd10	BTB domain containing 10 [Source:RGD Symbol;Acc:1306301]
ENSRNOG00000069950	39.6772	-0.135347	0.317904	-0.425746	0.670293	0.750891	ENSRNOG00000069950
ENSRNOG00000020543	549.913	-0.304031	0.0757645	-4.01285	5.99906e-05	0.000234614	ENSRNOG00000020543	Nosip	nitric oxide synthase interacting protein [Source:RGD Symbol;Acc:1309992]
ENSRNOG00000020298	416.712	-0.115012	0.0942789	-1.21991	0.222497	0.317002	ENSRNOG00000020298	Bag3	BAG cochaperone 3 [Source:RGD Symbol;Acc:1307794]
ENSRNOG00000018255	3835.48	-0.22015	0.0578919	-3.80278	0.000143081	0.000513514	ENSRNOG00000018255	Clptm1	CLPTM1 regulator of GABA type A receptor forward trafficking [Source:RGD Symbol;Acc:1310959]
ENSRNOG00000066399	295.216	-0.00983967	0.0856146	-0.11493	0.908501	0.937089	ENSRNOG00000066399
ENSRNOG00000021000	176.869	0.0484722	0.122141	0.396854	0.691475	0.768123	ENSRNOG00000021000	Naaladl1	N-acetylated alpha-linked acidic dipeptidase-like 1 [Source:RGD Symbol;Acc:620987]
ENSRNOG00000062327	560.809	-0.165617	0.0805088	-2.05713	0.039674	0.075181	ENSRNOG00000062327
ENSRNOG00000070318	67.0519	0.191766	0.21066	0.910311	0.362658	0.468092	ENSRNOG00000070318
ENSRNOG00000033729	442.636	0.103978	0.0866543	1.19992	0.230172	0.326081	ENSRNOG00000033729	LOC102556967	zinc finger protein 484-like [Source:RGD Symbol;Acc:7510716]
ENSRNOG00000020716	909.81	-0.0362995	0.0743856	-0.487992	0.625556	0.713622	ENSRNOG00000020716	Axl	Axl receptor tyrosine kinase [Source:RGD Symbol;Acc:620028]
ENSRNOG00000011488	518.51	-0.371983	0.0902266	-4.12277	3.74347e-05	0.000152513	ENSRNOG00000011488	Sergef	secretion regulating guanine nucleotide exchange factor [Source:RGD Symbol;Acc:1563497]
ENSRNOG00000067525	26.1286	0.887488	0.421178	2.10716	0.0351041	0.0677405	ENSRNOG00000067525	LOC120099976	uncharacterized LOC120099976 [Source:RGD Symbol;Acc:41077508]
ENSRNOG00000015441	270.827	0.135871	0.131669	1.03192	0.302111	0.405037	ENSRNOG00000015441	Il4r	interleukin 4 receptor [Source:RGD Symbol;Acc:2899]
ENSRNOG00000020412	5479.8	-0.290724	0.0426189	-6.82148	9.01076e-12	1.20311e-10	ENSRNOG00000020412	Sf3b2	splicing factor 3b, subunit 2 [Source:RGD Symbol;Acc:1307159]
ENSRNOG00000016923	1875.97	-0.169163	0.0566389	-2.98669	0.00282011	0.00745238	ENSRNOG00000016923	Clptm1l	CLPTM1-like [Source:RGD Symbol;Acc:1307896]
ENSRNOG00000066567	50.8562	1.38775	0.29518	4.70136	2.5844e-06	1.33827e-05	ENSRNOG00000066567
ENSRNOG00000010938	705.984	0.0232342	0.0729273	0.318594	0.750034	0.815946	ENSRNOG00000010938	Slc7a10	solute carrier family 7 member 10 [Source:RGD Symbol;Acc:621672]
ENSRNOG00000065260	352.182	0.210057	0.0948883	2.21373	0.0268471	0.0538536	ENSRNOG00000065260
ENSRNOG00000011029	537.887	-0.297587	0.0751406	-3.9604	7.4825e-05	0.000286911	ENSRNOG00000011029	Sec11a	SEC11 homolog A, signal peptidase complex subunit [Source:RGD Symbol;Acc:69360]
ENSRNOG00000015239	366.642	0.125539	0.0879112	1.42802	0.153286	0.234449	ENSRNOG00000015239	Ginm1	glycosylated integral membrane protein 1 [Source:RGD Symbol;Acc:1309759]
ENSRNOG00000069539	522.44	0.0408096	0.0760859	0.536363	0.591708	0.683547	ENSRNOG00000069539	Zfp74	zinc finger protein 74 [Source:RGD Symbol;Acc:1563223]
ENSRNOG00000018426	222.788	-0.131847	0.125036	-1.05447	0.291667	0.394018	ENSRNOG00000018426	Apoc1	apolipoprotein C1 [Source:RGD Symbol;Acc:2134]
ENSRNOG00000020110	1645.56	-0.212315	0.0595602	-3.56472	0.000364246	0.00119476	ENSRNOG00000020110	B4gat1	beta-1,4-glucuronyltransferase 1 [Source:RGD Symbol;Acc:1309541]
ENSRNOG00000012084	1619.24	-0.245814	0.0497	-4.94597	7.57663e-07	4.36762e-06	ENSRNOG00000012084	Xpnpep1	X-prolyl aminopeptidase 1 [Source:RGD Symbol;Acc:621274]
ENSRNOG00000046652	301.864	0.314582	0.12227	2.57284	0.0100866	0.0229209	ENSRNOG00000046652	Zfp790	zinc finger protein 30 homolog [Source:RGD Symbol;Acc:11363847]
ENSRNOG00000013770	645.819	0.19716	0.0703808	2.80133	0.00508931	0.012547	ENSRNOG00000013770	Folh1	folate hydrolase 1 [Source:RGD Symbol;Acc:70963]
ENSRNOG00000024961	665.707	-0.0730635	0.069414	-1.05258	0.292535	0.394897	ENSRNOG00000024961	Usp35	ubiquitin specific peptidase 35 [Source:RGD Symbol;Acc:1565984]
ENSRNOG00000011672	62.0561	0.0421386	0.23788	0.177142	0.859397	0.901162	ENSRNOG00000011672	Tph1	tryptophan hydroxylase 1 [Source:RGD Symbol;Acc:3895]
ENSRNOG00000017673	4383.94	-0.393925	0.0566588	-6.95258	3.58658e-12	5.08105e-11	ENSRNOG00000017673	Brsk1	BR serine/threonine kinase 1 [Source:RGD Symbol;Acc:1563268]
ENSRNOG00000032150	966.344	-0.250094	0.0678428	-3.68638	0.000227467	0.000783455	ENSRNOG00000032150	Adcy2	adenylate cyclase 2 [Source:RGD Symbol;Acc:619965]
ENSRNOG00000018356	4617.7	-0.275589	0.053883	-5.11457	3.1445e-07	1.95134e-06	ENSRNOG00000018356	Trim3	tripartite motif-containing 3 [Source:RGD Symbol;Acc:70074]
ENSRNOG00000023753	2883.63	0.401728	0.0528711	7.59826	3.00141e-14	5.81113e-13	ENSRNOG00000023753	Afdn	afadin, adherens junction formation factor [Source:RGD Symbol;Acc:708561]
ENSRNOG00000030932	683.829	-0.0180712	0.0632563	-0.285682	0.775122	0.83612	ENSRNOG00000030932	Zfp14	ZFP14 zinc finger protein [Source:RGD Symbol;Acc:1560188]
ENSRNOG00000018761	5196.07	-0.388581	0.0675276	-5.75441	8.69464e-09	7.23109e-08	ENSRNOG00000018761	Eif3c	eukaryotic translation initiation factor 3, subunit C [Source:RGD Symbol;Acc:1308871]
ENSRNOG00000062876	30.9333	-0.0171271	0.264479	-0.0647578	0.948367	0.965116	ENSRNOG00000062876	LOC108349685	uncharacterized LOC108349685 [Source:RGD Symbol;Acc:11462351]
ENSRNOG00000030160	62.9188	0.0947545	0.207227	0.45725	0.647491	0.733117	ENSRNOG00000030160	Zfp819	zinc finger protein 819 [Source:RGD Symbol;Acc:1309564]
ENSRNOG00000069633	56.0015	0.326004	0.20509	1.58956	0.111933	0.180398	ENSRNOG00000069633	Itpripl2	ITPRIP like 2 [Source:RGD Symbol;Acc:1564255]
ENSRNOG00000032946	232.906	0.263951	0.150664	1.75192	0.0797882	0.135986	ENSRNOG00000032946	Pdzd7	PDZ domain containing 7 [Source:RGD Symbol;Acc:1309882]
ENSRNOG00000012362	182.595	-0.326058	0.12133	-2.68736	0.00720189	0.0170356	ENSRNOG00000012362	Cacng3	calcium voltage-gated channel auxiliary subunit gamma 3 [Source:RGD Symbol;Acc:628803]
ENSRNOG00000014303	5871.53	-0.133194	0.0507489	-2.62458	0.00867563	0.0200859	ENSRNOG00000014303	Lrp11	LDL receptor related protein 11 [Source:RGD Symbol;Acc:1308602]
ENSRNOG00000018454	19285	-0.277695	0.145937	-1.90284	0.0570609	0.102286	ENSRNOG00000018454	Apoe	apolipoprotein E [Source:RGD Symbol;Acc:2138]
ENSRNOG00000020531	746.003	-0.219278	0.0659252	-3.32617	0.000880496	0.00263949	ENSRNOG00000020531	Fen1	flap structure-specific endonuclease 1 [Source:RGD Symbol;Acc:621821]
ENSRNOG00000019544	298.128	0.0342127	0.109791	0.311617	0.755332	0.820549	ENSRNOG00000019544	Zbtb2	zinc finger and BTB domain containing 2 [Source:RGD Symbol;Acc:1306621]
ENSRNOG00000020477	82.6019	0.114873	0.178414	0.643852	0.519671	0.619044	ENSRNOG00000020477	LOC100911093	CCA tRNA nucleotidyltransferase 1, mitochondrial-like [Source:RGD Symbol;Acc:6494996]
ENSRNOG00000023549	44.5052	0.73552	0.247407	2.97292	0.00294986	0.00776135	ENSRNOG00000023549	Samd5	sterile alpha motif domain containing 5 [Source:RGD Symbol;Acc:1311012]
ENSRNOG00000021096	528.891	-0.242658	0.0844731	-2.8726	0.00407104	0.0103025	ENSRNOG00000021096	Tmem143	transmembrane protein 143 [Source:RGD Symbol;Acc:1305013]
ENSRNOG00000022796	213.061	-0.000122026	0.119033	-0.00102514	0.999182	0.999526	ENSRNOG00000022796	Fgfbp3	fibroblast growth factor binding protein 3 [Source:RGD Symbol;Acc:1560326]
ENSRNOG00000029784	13101.1	-0.128116	0.0830519	-1.5426	0.122927	0.194766	ENSRNOG00000029784	Pak1	p21 (RAC1) activated kinase 1 [Source:RGD Symbol;Acc:3250]
ENSRNOG00000018885	1366.68	0.301921	0.0720951	4.18782	2.81643e-05	0.000117521	ENSRNOG00000018885	Zfp780b	zinc finger protein 780B [Source:RGD Symbol;Acc:1592570]
ENSRNOG00000063852	758.08	0.0192417	0.0673734	0.285598	0.775186	0.83612	ENSRNOG00000063852	Tmem80	transmembrane protein 80 [Source:RGD Symbol;Acc:1308399]
ENSRNOG00000048138	314.347	-0.0766069	0.102547	-0.747039	0.45504	0.558868	ENSRNOG00000048138	Zfp566	zinc finger protein 566 [Source:RGD Symbol;Acc:1563239]
ENSRNOG00000019306	2262.13	-0.348425	0.0721475	-4.82934	1.36984e-06	7.53179e-06	ENSRNOG00000019306	Syt12	synaptotagmin 12 [Source:RGD Symbol;Acc:621876]
ENSRNOG00000018440	2015.4	-0.176567	0.0485909	-3.63373	0.00027935	0.000942238	ENSRNOG00000018440	Arfip2	ADP-ribosylation factor interacting protein 2 [Source:RGD Symbol;Acc:1303204]
ENSRNOG00000029082	201.168	-0.325026	0.118206	-2.74966	0.0059657	0.014438	ENSRNOG00000029082	RGD1566189	similar to ferritin light chain [Source:RGD Symbol;Acc:1566189]
ENSRNOG00000021104	32.3778	-0.895407	0.32157	-2.78449	0.00536119	0.0131281	ENSRNOG00000021104	Emp3	epithelial membrane protein 3 [Source:RGD Symbol;Acc:621094]
ENSRNOG00000011451	2095.13	-0.356384	0.0629495	-5.66144	1.50111e-08	1.18273e-07	ENSRNOG00000011451	Lrp3	LDL receptor related protein 3 [Source:RGD Symbol;Acc:619729]
ENSRNOG00000017254	1404.01	-0.138359	0.054097	-2.55761	0.0105393	0.0238457	ENSRNOG00000017254	Nsun2	NOP2/Sun RNA methyltransferase 2 [Source:RGD Symbol;Acc:1311954]
ENSRNOG00000020117	643.318	-0.0659285	0.0705563	-0.93441	0.350093	0.454957	ENSRNOG00000020117	Brms1	BRMS1, transcriptional repressor and anoikis regulator [Source:RGD Symbol;Acc:1311057]
ENSRNOG00000050995	246.12	0.368886	0.102145	3.61139	0.000304557	0.00101713	ENSRNOG00000050995	Zfp780b	zinc finger protein 780B [Source:RGD Symbol;Acc:1592570]
ENSRNOG00000015503	920.29	-0.276742	0.0994847	-2.78176	0.00540651	0.0132213	ENSRNOG00000015503	Otud7a	OTU deubiquitinase 7A [Source:RGD Symbol;Acc:1563721]
ENSRNOG00000021003	185.175	-0.47625	0.140805	-3.38233	0.000718729	0.00220742	ENSRNOG00000021003	Sac3d1	SAC3 domain containing 1 [Source:RGD Symbol;Acc:1308049]
ENSRNOG00000020274	300.641	0.247366	0.119554	2.06908	0.0385382	0.0733631	ENSRNOG00000020274	Taf5	TATA-box binding protein associated factor 5 [Source:RGD Symbol;Acc:1311332]
ENSRNOG00000065528	45.0548	0.21096	0.247276	0.853136	0.393584	0.498494	ENSRNOG00000065528	St8sia2	ST8 alpha-N-acetyl-neuraminide alpha-2,8-sialyltransferase 2 [Source:RGD Symbol;Acc:621843]
ENSRNOG00000022701	45.1008	0.0356018	0.244422	0.145657	0.884192	0.919264	ENSRNOG00000022701	Ceacam18	CEA cell adhesion molecule 18 [Source:RGD Symbol;Acc:1563539]
ENSRNOG00000058039	163.522	-0.43043	0.213187	-2.01902	0.0434847	0.0812144	ENSRNOG00000058039	Acta2	actin alpha 2, smooth muscle [Source:RGD Symbol;Acc:621676]
ENSRNOG00000018556	1032.98	-0.439301	0.0821181	-5.34963	8.81352e-08	6.05783e-07	ENSRNOG00000018556	Tomm40	translocase of outer mitochondrial membrane 40 [Source:RGD Symbol;Acc:1303022]
ENSRNOG00000065206	21.3741	-0.347838	0.324689	-1.07129	0.284037	0.385823	ENSRNOG00000065206
ENSRNOG00000028137	127.438	-0.176984	0.260464	-0.679495	0.496824	0.598456	ENSRNOG00000028137	Mki67	marker of proliferation Ki-67 [Source:RGD Symbol;Acc:1305476]
ENSRNOG00000051102	158.17	-0.360526	0.126014	-2.86101	0.00422293	0.0106516	ENSRNOG00000051102	AABR07004269.3
ENSRNOG00000010983	29.4801	0.358384	0.276685	1.29528	0.195224	0.285454	ENSRNOG00000010983	Otog	otogelin [Source:RGD Symbol;Acc:1306610]
ENSRNOG00000020296	2042.63	-0.0912505	0.05193	-1.75718	0.0788871	0.134628	ENSRNOG00000020296	Atp5mk	ATP synthase membrane subunit K [Source:RGD Symbol;Acc:631426]
ENSRNOG00000029805	591.213	0.403812	0.0873874	4.62094	3.81998e-06	1.91012e-05	ENSRNOG00000029805	Zfp780b	zinc finger protein 780B [Source:RGD Symbol;Acc:1592570]
ENSRNOG00000017601	604.572	-0.0791491	0.0825879	-0.958362	0.33788	0.442812	ENSRNOG00000017601	Srd5a1	steroid 5 alpha-reductase 1 [Source:RGD Symbol;Acc:3757]
ENSRNOG00000016090	618.153	0.362474	0.0751969	4.82033	1.43321e-06	7.81896e-06	ENSRNOG00000016090	Mtmr10	myotubularin related protein 10 [Source:RGD Symbol;Acc:1305958]
ENSRNOG00000045560	21.1523	1.28964	0.38543	3.34597	0.000819959	0.00247797	ENSRNOG00000045560	Gvin1	GTPase, very large interferon inducible 1 [Source:RGD Symbol;Acc:1598220]
ENSRNOG00000020651	1410.97	-0.16908	0.0639319	-2.64468	0.00817673	0.0190493	ENSRNOG00000020651	Cars1	cysteinyl-tRNA synthetase 1 [Source:RGD Symbol;Acc:1310747]
ENSRNOG00000065330	80.9876	0.0487035	0.196444	0.247926	0.804192	0.858778	ENSRNOG00000065330	Mrgpre	MAS related GPR family member E [Source:RGD Symbol;Acc:738045]
ENSRNOG00000016679	172.736	0.419652	0.134557	3.11878	0.00181603	0.00503255	ENSRNOG00000016679	Tmc7	transmembrane channel-like 7 [Source:RGD Symbol;Acc:1564267]
ENSRNOG00000018350	1336.42	0.0919948	0.0715888	1.28505	0.198777	0.289832	ENSRNOG00000018350	Shtn1	shootin 1 [Source:RGD Symbol;Acc:1311558]
ENSRNOG00000028992	39.4766	-0.209974	0.303554	-0.691719	0.489114	0.591081	ENSRNOG00000028992	Acan	aggrecan [Source:RGD Symbol;Acc:68358]
ENSRNOG00000019838	30.1676	0.515623	0.307687	1.6758	0.093777	0.155912	ENSRNOG00000019838	Gmfg	glia maturation factor, gamma [Source:RGD Symbol;Acc:620506]
ENSRNOG00000019549	6627.95	0.0386224	0.0881821	0.437985	0.661397	0.7437	ENSRNOG00000019549	Akap12	A-kinase anchoring protein 12 [Source:RGD Symbol;Acc:70988]
ENSRNOG00000011151	249.138	0.357134	0.145665	2.45175	0.0142165	0.0309456	ENSRNOG00000011151	Tenm4	teneurin transmembrane protein 4 [Source:RGD Symbol;Acc:1304658]
ENSRNOG00000022189	27.127	-0.419091	0.320792	-1.30642	0.191408	0.281092	ENSRNOG00000022189	Htatip2	HIV-1 Tat interactive protein 2 [Source:RGD Symbol;Acc:1309941]
ENSRNOG00000020762	1366.76	-0.0433416	0.0646267	-0.670645	0.502447	0.603277	ENSRNOG00000020762	Zfp260	zinc finger protein 260 [Source:RGD Symbol;Acc:621205]
ENSRNOG00000023318	275.531	-0.158349	0.107876	-1.46788	0.142136	0.219967	ENSRNOG00000023318	Tigd3	tigger transposable element derived 3 [Source:RGD Symbol;Acc:1305393]
ENSRNOG00000066701	81.2645	-0.577701	0.185975	-3.10633	0.00189423	0.00522832	ENSRNOG00000066701	LOC691427	similar to 6.8 kDa mitochondrial proteolipid [Source:RGD Symbol;Acc:1583946]
ENSRNOG00000053075	1065.21	-0.132229	0.0619641	-2.13396	0.032846	0.0640297	ENSRNOG00000053075	B4galnt4	beta-1,4-N-acetyl-galactosaminyl transferase 4 [Source:RGD Symbol;Acc:1310052]
ENSRNOG00000012874	1476.6	-0.326934	0.0738008	-4.42995	9.42538e-06	4.37831e-05	ENSRNOG00000012874	Rgma	repulsive guidance molecule BMP co-receptor a [Source:RGD Symbol;Acc:1311983]
ENSRNOG00000065214	212.373	-0.354632	0.181375	-1.95524	0.050555	0.0922851	ENSRNOG00000065214	LOC120097335	high mobility group nucleosome-binding domain-containing protein 5-like [Source:RGD Symbol;Acc:41304028]
ENSRNOG00000011895	347.601	0.259716	0.0886179	2.93074	0.0033816	0.00874518	ENSRNOG00000011895	Saal1	serum amyloid A-like 1 [Source:RGD Symbol;Acc:1587443]
ENSRNOG00000017659	35.1862	-0.849889	0.333874	-2.54554	0.0109109	0.0245983	ENSRNOG00000017659	Hs3st2	heparan sulfate-glucosamine 3-sulfotransferase 2 [Source:RGD Symbol;Acc:727787]
ENSRNOG00000020777	568.302	0.135836	0.0900851	1.50786	0.131589	0.206417	ENSRNOG00000020777	Zfp382	zinc finger protein 382 [Source:RGD Symbol;Acc:708385]
ENSRNOG00000016266	541.405	-0.0348818	0.082099	-0.424875	0.670928	0.751276	ENSRNOG00000016266	Mphosph10	M-phase phosphoprotein 10 [Source:RGD Symbol;Acc:1307633]
ENSRNOG00000017839	401.874	-0.34735	0.0850366	-4.08471	4.41318e-05	0.000177125	ENSRNOG00000017839	Ercc1	ERCC excision repair 1, endonuclease non-catalytic subunit [Source:RGD Symbol;Acc:1306992]
ENSRNOG00000017918	771.334	-0.286033	0.0955514	-2.9935	0.00275802	0.00729892	ENSRNOG00000017918	Iglon5	IgLON family member 5 [Source:RGD Symbol;Acc:1305344]
ENSRNOG00000016381	302.473	-0.0051806	0.0960306	-0.0539473	0.956977	0.971359	ENSRNOG00000016381	Ust	uronyl-2-sulfotransferase [Source:RGD Symbol;Acc:1304743]
ENSRNOG00000020736	261.174	0.0561919	0.132573	0.423857	0.67167	0.751807	ENSRNOG00000020736	Nadsyn1	NAD synthetase 1 [Source:RGD Symbol;Acc:727801]
ENSRNOG00000023985	537.802	0.14588	0.0855561	1.70508	0.0881799	0.148194	ENSRNOG00000023985	Fan1	FANCD2 and FANCI associated nuclease 1 [Source:RGD Symbol;Acc:1566323]
ENSRNOG00000019376	661.874	0.382532	0.0762112	5.01936	5.18426e-07	3.08654e-06	ENSRNOG00000019376	Zfp329	zinc finger protein 329 [Source:RGD Symbol;Acc:1565029]
ENSRNOG00000017456	42.923	-0.279943	0.24483	-1.14342	0.252865	0.351349	ENSRNOG00000017456	Vstm2b	V-set and transmembrane domain containing 2B [Source:RGD Symbol;Acc:1306235]
ENSRNOG00000008815	436.993	-0.205532	0.0875295	-2.34814	0.0188673	0.0396085	ENSRNOG00000008815	Fbxo46	F-box protein 46 [Source:RGD Symbol;Acc:1308393]
ENSRNOG00000016722	2314.3	0.00702534	0.0476408	0.147465	0.882765	0.918567	ENSRNOG00000016722	Xpo6	exportin 6 [Source:RGD Symbol;Acc:1311491]
ENSRNOG00000048397	1079.43	-0.232597	0.0695101	-3.34624	0.000819163	0.00247608	ENSRNOG00000048397	Sephs2	selenophosphate synthetase 2 [Source:RGD Symbol;Acc:1308827]
ENSRNOG00000017728	1308.49	0.20898	0.0846329	2.46925	0.0135395	0.0296989	ENSRNOG00000017728	Edrf1	erythroid differentiation regulatory factor 1 [Source:RGD Symbol;Acc:1306820]
ENSRNOG00000067450	1337.25	0.0322728	0.0598108	0.539582	0.589485	0.681739	ENSRNOG00000067450	Zfp146	zinc finger protein 146 [Source:RGD Symbol;Acc:7630088]
ENSRNOG00000015552	801.12	0.0357891	0.0626793	0.570988	0.568008	0.662973	ENSRNOG00000015552	Ppil4	peptidylprolyl isomerase like 4 [Source:RGD Symbol;Acc:1311051]
ENSRNOG00000016919	2692.13	-0.00180303	0.0513038	-0.0351443	0.971965	0.981706	ENSRNOG00000016919	Scaf8	SR-related CTD-associated factor 8 [Source:RGD Symbol;Acc:708362]
ENSRNOG00000019106	4447.77	-0.553555	0.0584744	-9.46662	2.89045e-21	1.45232e-19	ENSRNOG00000019106	Rps17	40S ribosomal protein S17-like [Source:RGD Symbol;Acc:2318277]
ENSRNOG00000010959	431.225	-0.291398	0.0949095	-3.07027	0.00213862	0.00582644	ENSRNOG00000010959	Klhl25	kelch-like family member 25 [Source:RGD Symbol;Acc:1310815]
ENSRNOG00000021474	27.8899	0.797702	0.317119	2.51547	0.0118874	0.0264872	ENSRNOG00000021474	Siglec5	sialic acid binding Ig-like lectin 5 [Source:RGD Symbol;Acc:1305432]
ENSRNOG00000028274	1481.75	0.171631	0.111152	1.54411	0.122561	0.19427	ENSRNOG00000028274	Myrf	myelin regulatory factor [Source:RGD Symbol;Acc:1306622]
ENSRNOG00000024410	352.93	-0.357288	0.0870233	-4.10566	4.03154e-05	0.000163206	ENSRNOG00000024410	Blvrb	biliverdin reductase B [Source:RGD Symbol;Acc:1306080]
ENSRNOG00000010017	858.711	0.339316	0.0687841	4.93306	8.09527e-07	4.6408e-06	ENSRNOG00000010017	Wee1	WEE1 G2 checkpoint kinase [Source:RGD Symbol;Acc:1307895]
ENSRNOG00000050015	47.1254	-0.221707	0.237343	-0.934121	0.350241	0.45511	ENSRNOG00000050015	Cox7a1	cytochrome c oxidase subunit 7A1 [Source:RGD Symbol;Acc:6496527]
ENSRNOG00000047692	145.211	0.589169	0.190217	3.09736	0.00195254	0.00536406	ENSRNOG00000047692	Hells	helicase, lymphoid specific [Source:RGD Symbol;Acc:1309820]
ENSRNOG00000065271	43.1054	-0.111628	0.280575	-0.397855	0.690737	0.767597	ENSRNOG00000065271	Fam174b	family with sequence similarity 174, member B [Source:RGD Symbol;Acc:1596692]
ENSRNOG00000020304	1572.91	0.0771096	0.0730706	1.05527	0.2913	0.393668	ENSRNOG00000020304	Pdcd11	programmed cell death 11 [Source:RGD Symbol;Acc:1304933]
ENSRNOG00000017418	6814.18	-0.222868	0.0452273	-4.92773	8.31916e-07	4.75975e-06	ENSRNOG00000017418	Rps3	ribosomal protein S3 [Source:RGD Symbol;Acc:619888]
ENSRNOG00000012369	226.176	-0.0404099	0.15279	-0.264481	0.791409	0.849105	ENSRNOG00000012369	Fam174b	family with sequence similarity 174, member B [Source:RGD Symbol;Acc:1596692]
ENSRNOG00000014450	1483.59	0.318071	0.0605549	5.25261	1.49958e-07	9.84421e-07	ENSRNOG00000014450	Shprh	SNF2 histone linker PHD RING helicase [Source:RGD Symbol;Acc:1310342]
ENSRNOG00000067065	3210.94	0.0665356	0.0642537	1.03551	0.300429	0.403261	ENSRNOG00000067065	Capns1	calpain, small subunit 1 [Source:RGD Symbol;Acc:2270]
ENSRNOG00000037298	193.002	0.0364241	0.128561	0.283322	0.77693	0.837426	ENSRNOG00000037298	C1h19orf81	simlar to human chromosome 19 open reading frame 81 [Source:RGD Symbol;Acc:1309036]
ENSRNOG00000016825	125.328	-0.166504	0.138626	-1.20111	0.229709	0.325552	ENSRNOG00000016825	Polr1g	RNA polymerase I subunit G [Source:RGD Symbol;Acc:1591707]
ENSRNOG00000024737	3677.98	0.489406	0.0551885	8.8679	7.45398e-19	2.77536e-17	ENSRNOG00000024737	Tnrc6a	trinucleotide repeat containing adaptor 6A [Source:RGD Symbol;Acc:1307268]
ENSRNOG00000013624	65.8552	0.720213	0.213773	3.36906	0.000754257	0.00230193	ENSRNOG00000013624	Uevld	UEV and lactate/malate dehyrogenase domains [Source:RGD Symbol;Acc:1587416]
ENSRNOG00000020325	219.768	-0.320309	0.115343	-2.77703	0.00548586	0.013386	ENSRNOG00000020325	Calhm2	calcium homeostasis modulator family member 2 [Source:RGD Symbol;Acc:1308276]
ENSRNOG00000019854	151.612	0.358458	0.145179	2.46908	0.0135461	0.0297089	ENSRNOG00000019854	Napsa	napsin A aspartic peptidase [Source:RGD Symbol;Acc:61940]
ENSRNOG00000015413	287.563	-0.299213	0.0960885	-3.11394	0.0018461	0.00510905	ENSRNOG00000015413	Qpctl	glutaminyl-peptide cyclotransferase-like [Source:RGD Symbol;Acc:1308128]
ENSRNOG00000016897	457.404	-0.0949432	0.0953762	-0.995461	0.319512	0.424098	ENSRNOG00000016897	Rlbp1	retinaldehyde binding protein 1 [Source:RGD Symbol;Acc:1309649]
ENSRNOG00000037690	65.2111	-0.134443	0.232275	-0.578809	0.562718	0.658238	ENSRNOG00000037690	Sertad3	SERTA domain containing 3 [Source:RGD Symbol;Acc:1564271]
ENSRNOG00000014330	4720.85	0.0903996	0.043064	2.09919	0.0358002	0.0688549	ENSRNOG00000014330	Pcmt1	protein-L-isoaspartate (D-aspartate) O-methyltransferase 1 [Source:RGD Symbol;Acc:3268]
ENSRNOG00000013223	519.262	0.33067	0.0810725	4.07869	4.52893e-05	0.00018122	ENSRNOG00000013223	Fah	fumarylacetoacetate hydrolase [Source:RGD Symbol;Acc:61932]
ENSRNOG00000046112	362.705	-0.158689	0.099002	-1.60289	0.108959	0.176466	ENSRNOG00000046112	Dedd2	death effector domain containing 2 [Source:RGD Symbol;Acc:1588968]
ENSRNOG00000027264	2779.78	-0.212854	0.0585337	-3.63643	0.000276447	0.000933122	ENSRNOG00000027264	Dagla	diacylglycerol lipase, alpha [Source:RGD Symbol;Acc:1359461]
ENSRNOG00000032798	1380.78	-0.138498	0.0653551	-2.11916	0.0340768	0.0660267	ENSRNOG00000032798	Slco3a1	solute carrier organic anion transporter family, member 3a1 [Source:RGD Symbol;Acc:620227]
ENSRNOG00000019319	957.202	0.155376	0.0889616	1.74656	0.0807145	0.137388	ENSRNOG00000019319	Fchsd2	FCH and double SH3 domains 2 [Source:RGD Symbol;Acc:1304812]
ENSRNOG00000018603	407.476	0.634642	0.131637	4.82114	1.42738e-06	7.80092e-06	ENSRNOG00000018603	Carns1	carnosine synthase 1 [Source:RGD Symbol;Acc:1308234]
ENSRNOG00000027422	476.749	0.121779	0.0776429	1.56845	0.116777	0.186774	ENSRNOG00000027422	Fastkd3	FAST kinase domains 3 [Source:RGD Symbol;Acc:1309729]
ENSRNOG00000020763	8886.72	0.302505	0.0836579	3.61598	0.000299212	0.00100166	ENSRNOG00000020763	Snrnp70	small nuclear ribonucleoprotein U1 subunit 70 [Source:RGD Symbol;Acc:1307120]
ENSRNOG00000049505	246.67	0.0392632	0.108205	0.362858	0.716711	0.789443	ENSRNOG00000049505	Nup43	nucleoporin 43 [Source:RGD Symbol;Acc:1596513]
ENSRNOG00000059408	1360.91	-0.327204	0.0890212	-3.67557	0.000237315	0.000813132	ENSRNOG00000059408	Prr12	proline rich 12 [Source:RGD Symbol;Acc:1309896]
ENSRNOG00000048250	69.5033	-0.261319	0.18271	-1.43024	0.152648	0.233819	ENSRNOG00000048250	Ldaf1	lipid droplet assembly factor 1 [Source:RGD Symbol;Acc:727895]
ENSRNOG00000028891	413.484	0.218762	0.115367	1.89623	0.0579297	0.103608	ENSRNOG00000028891	Cyp2t1	cytochrome P450, family 2, subfamily t, polypeptide 1 [Source:RGD Symbol;Acc:620086]
ENSRNOG00000019959	18418.9	-0.258624	0.0662776	-3.90214	9.53468e-05	0.000355281	ENSRNOG00000019959	Kcnc3	potassium voltage-gated channel subfamily C member 3 [Source:RGD Symbol;Acc:621358]
ENSRNOG00000020452	1561.3	-0.121005	0.0588697	-2.05547	0.039834	0.0754441	ENSRNOG00000020452	Nsmce4a	NSE4 homolog A, SMC5-SMC6 complex component [Source:RGD Symbol;Acc:1309025]
ENSRNOG00000050224	451.447	-0.146591	0.090309	-1.62322	0.104543	0.170401	ENSRNOG00000050224	Stambpl1	STAM binding protein-like 1 [Source:RGD Symbol;Acc:1583011]
ENSRNOG00000014916	1370.37	0.572384	0.061942	9.24064	2.45016e-20	1.10151e-18	ENSRNOG00000014916	Lats1	large tumor suppressor kinase 1 [Source:RGD Symbol;Acc:1564085]
ENSRNOG00000020263	32589.5	-0.00024917	0.0572109	-0.00435529	0.996525	0.997434	ENSRNOG00000020263	Atp1a3	ATPase Na+/K+ transporting subunit alpha 3 [Source:RGD Symbol;Acc:2169]
ENSRNOG00000058277	27.2549	0.889853	0.356627	2.49519	0.012589	0.0278496	ENSRNOG00000058277	AC080157.1
ENSRNOG00000051197	241.666	-0.150395	0.12127	-1.24017	0.214913	0.308772	ENSRNOG00000051197	LOC120097345	60S ribosomal protein L7a [Source:RGD Symbol;Acc:41344265]
ENSRNOG00000020947	1330.65	-0.504265	0.0874471	-5.76651	8.09304e-09	6.75009e-08	ENSRNOG00000020947	Egln2	egl-9 family hypoxia-inducible factor 2 [Source:RGD Symbol;Acc:631376]
ENSRNOG00000020597	307.507	-0.0338957	0.1085	-0.312404	0.754733	0.820075	ENSRNOG00000020597	C1h10orf88	similar to human chromosome 10 open reading frame 88 [Source:RGD Symbol;Acc:1305014]
ENSRNOG00000017826	1327.26	-0.200201	0.0552968	-3.62048	0.000294055	0.000987048	ENSRNOG00000017826	Mtrr	5-methyltetrahydrofolate-homocysteine methyltransferase reductase [Source:RGD Symbol;Acc:1308671]
ENSRNOG00000013506	1710.53	0.39756	0.0599269	6.63408	3.26531e-11	3.97781e-10	ENSRNOG00000013506	Zfand6	zinc finger AN1-type containing 6 [Source:RGD Symbol;Acc:1359317]
ENSRNOG00000014277	495.186	0.0305112	0.0849007	0.359376	0.719314	0.79148	ENSRNOG00000014277	Zdhhc13	zinc finger DHHC-type palmitoyltransferase 13 [Source:RGD Symbol;Acc:1309736]
ENSRNOG00000012641	1637.42	0.200342	0.0813847	2.46167	0.0138291	0.030252	ENSRNOG00000012641	Sfr1	SWI5-dependent homologous recombination repair protein 1 [Source:RGD Symbol;Acc:1305481]
ENSRNOG00000015675	915.291	-0.337117	0.0810887	-4.15739	3.21903e-05	0.000132983	ENSRNOG00000015675	Nell1	neural EGFL like 1 [Source:RGD Symbol;Acc:620998]
ENSRNOG00000050206	4708.51	-0.186626	0.0649744	-2.8723	0.0040749	0.0103105	ENSRNOG00000050206	Shank2	SH3 and multiple ankyrin repeat domains 2 [Source:RGD Symbol;Acc:628772]
ENSRNOG00000012002	861.622	0.246656	0.0633331	3.89457	9.83721e-05	0.000365897	ENSRNOG00000012002	Iqgap1	IQ motif containing GTPase activating protein 1 [Source:RGD Symbol;Acc:1311884]
ENSRNOG00000012788	1394.71	-0.26388	0.0550618	-4.79244	1.64762e-06	8.88573e-06	ENSRNOG00000012788	Clns1a	chloride nucleotide-sensitive channel 1A [Source:RGD Symbol;Acc:61884]
ENSRNOG00000019418	2448.53	-0.550856	0.137049	-4.01942	5.83427e-05	0.000228477	ENSRNOG00000019418	Lrrc4b	leucine rich repeat containing 4B [Source:RGD Symbol;Acc:1307121]
ENSRNOG00000042308	31.3515	0.121493	0.273832	0.443677	0.657276	0.7405	ENSRNOG00000042308	Zfp455l1	zinc finger protein 455 like 1 [Source:RGD Symbol;Acc:1594231]
ENSRNOG00000012574	781.018	0.144951	0.0633254	2.28899	0.0220801	0.0454079	ENSRNOG00000012574	Pum3	pumilio RNA-binding family member 3 [Source:RGD Symbol;Acc:1564753]
ENSRNOG00000001500	1056.79	-0.291073	0.0684964	-4.24946	2.14284e-05	9.18965e-05	ENSRNOG00000001500	Rab4b	RAB4B, member RAS oncogene family [Source:RGD Symbol;Acc:620931]
ENSRNOG00000016737	604.706	-0.513182	0.10135	-5.06347	4.11683e-07	2.50224e-06	ENSRNOG00000016737	Tcerg1l	transcription elongation regulator 1-like [Source:RGD Symbol;Acc:1562437]
ENSRNOG00000019413	104.208	0.567504	0.147894	3.83723	0.000124429	0.000451935	ENSRNOG00000019413	Atg16l2	autophagy related 16-like 2 [Source:RGD Symbol;Acc:1311400]
ENSRNOG00000068445	1802.29	-0.928787	0.156397	-5.93865	2.87382e-09	2.57916e-08	ENSRNOG00000068445	Rplp2	ribosomal protein lateral stalk subunit P2 [Source:RGD Symbol;Acc:621775]
ENSRNOG00000015844	594.568	-0.437073	0.100176	-4.36306	1.28255e-05	5.81272e-05	ENSRNOG00000015844	Snrpd2	small nuclear ribonucleoprotein D2 polypeptide [Source:RGD Symbol;Acc:1593018]
ENSRNOG00000068953	386.787	-0.121787	0.0845741	-1.44001	0.149866	0.230067	ENSRNOG00000068953
ENSRNOG00000017963	724.629	0.325971	0.0880714	3.70121	0.000214573	0.0007431	ENSRNOG00000017963	RGD1566325	similar to regulator of sex-limitation candidate 16 [Source:RGD Symbol;Acc:1566325]
ENSRNOG00000019532	1470.66	-0.381904	0.0831977	-4.59031	4.42582e-06	2.18671e-05	ENSRNOG00000019532	Emc10	ER membrane protein complex subunit 10 [Source:RGD Symbol;Acc:1303214]
ENSRNOG00000015217	800.861	-0.163221	0.0681638	-2.39454	0.016641	0.0354525	ENSRNOG00000015217	Ltv1	LTV1 ribosome biogenesis factor [Source:RGD Symbol;Acc:1311264]
ENSRNOG00000016267	2136.19	-0.177725	0.0623832	-2.84893	0.00438663	0.0110137	ENSRNOG00000016267	Chst15	carbohydrate sulfotransferase 15 [Source:RGD Symbol;Acc:628881]
ENSRNOG00000020425	2677.71	0.0211521	0.0600244	0.352392	0.724544	0.795956	ENSRNOG00000020425	Stim1	stromal interaction molecule 1 [Source:RGD Symbol;Acc:1306831]
ENSRNOG00000017383	505.355	-0.245726	0.114922	-2.1382	0.0325004	0.0634497	ENSRNOG00000017383	Hikeshi	heat shock protein nuclear import factor hikeshi [Source:RGD Symbol;Acc:1359455]
ENSRNOG00000019161	478.749	0.561346	0.083652	6.71049	1.93966e-11	2.42391e-10	ENSRNOG00000019161	Cpeb1	cytoplasmic polyadenylation element binding protein 1 [Source:RGD Symbol;Acc:1310421]
ENSRNOG00000047526	585.643	-0.0744553	0.0705447	-1.05543	0.291227	0.393606	ENSRNOG00000047526	Zfp526	zinc finger protein 526 [Source:RGD Symbol;Acc:1588959]
ENSRNOG00000016462	504.282	0.218798	0.121523	1.80047	0.071787	0.124245	ENSRNOG00000016462	LOC102547287	zinc finger protein 728-like [Source:RGD Symbol;Acc:7718701]
ENSRNOG00000010664	310.964	-0.370465	0.0945823	-3.91686	8.97103e-05	0.000336611	ENSRNOG00000010664	Wdr73	WD repeat domain 73 [Source:RGD Symbol;Acc:1306429]
ENSRNOG00000019424	54.0124	-0.104843	0.262518	-0.399375	0.689617	0.766704	ENSRNOG00000019424	Aspdh	aspartate dehydrogenase domain containing [Source:RGD Symbol;Acc:1310111]
ENSRNOG00000016790	2096.77	0.374593	0.0551816	6.78837	1.1341e-11	1.48363e-10	ENSRNOG00000016790	Kmt5b	lysine methyltransferase 5B [Source:RGD Symbol;Acc:1311637]
ENSRNOG00000039730	866.252	-0.299409	0.0714834	-4.18851	2.80796e-05	0.000117269	ENSRNOG00000039730	Orai3	ORAI calcium release-activated calcium modulator 3 [Source:RGD Symbol;Acc:1306538]
ENSRNOG00000020949	192.786	-0.318118	0.120203	-2.64649	0.00813309	0.0189568	ENSRNOG00000020949	Hsd17b14	hydroxysteroid (17-beta) dehydrogenase 14 [Source:RGD Symbol;Acc:1588673]
ENSRNOG00000013358	113.947	-0.0793875	0.143253	-0.554176	0.579458	0.672876	ENSRNOG00000013358	Aqp11	aquaporin 11 [Source:RGD Symbol;Acc:628763]
ENSRNOG00000049259	557.152	0.325812	0.101291	3.2166	0.0012972	0.00372781	ENSRNOG00000049259	LOC102549842	zinc finger protein 91-like [Source:RGD Symbol;Acc:7600894]
ENSRNOG00000015860	44.7557	2.32266	0.311949	7.44562	9.64887e-14	1.72977e-12	ENSRNOG00000015860	Gipr	gastric inhibitory polypeptide receptor [Source:RGD Symbol;Acc:2689]
ENSRNOG00000018517	106.324	0.343087	0.150338	2.28211	0.0224827	0.0461312	ENSRNOG00000018517	Trim21	tripartite motif-containing 21 [Source:RGD Symbol;Acc:1305795]
ENSRNOG00000021206	929.097	-0.259746	0.0662629	-3.91994	8.85721e-05	0.000332856	ENSRNOG00000021206	Plaat3	phospholipase A and acyltransferase 3 [Source:RGD Symbol;Acc:2829]
ENSRNOG00000069921	499.485	0.490003	0.083809	5.84667	5.01512e-09	4.34255e-08	ENSRNOG00000069921	Zfp748	zinc finger protein 748 [Source:RGD Symbol;Acc:1594173]
ENSRNOG00000016054	1656.01	0.0488804	0.0521833	0.936705	0.34891	0.453825	ENSRNOG00000016054	Tab2	TGF-beta activated kinase 1/MAP3K7 binding protein 2 [Source:RGD Symbol;Acc:1309527]
ENSRNOG00000020956	210.742	-0.057685	0.109257	-0.527975	0.597517	0.688942	ENSRNOG00000020956	Bcat2	branched chain amino acid transaminase 2 [Source:RGD Symbol;Acc:68948]
ENSRNOG00000001501	322.487	-0.187283	0.103515	-1.80924	0.0704135	0.122335	ENSRNOG00000001501	Snrpa	small nuclear ribonucleoprotein polypeptide A [Source:RGD Symbol;Acc:1307416]
ENSRNOG00000020417	2622.87	-0.152732	0.0494728	-3.08719	0.00202058	0.0055381	ENSRNOG00000020417	Gsk3a	glycogen synthase kinase 3 alpha [Source:RGD Symbol;Acc:620351]
ENSRNOG00000013877	195.511	-0.160834	0.131804	-1.22025	0.22237	0.3169	ENSRNOG00000013877	Ttc23	tetratricopeptide repeat domain 23 [Source:RGD Symbol;Acc:1310409]
ENSRNOG00000064721	1703.5	0.0820997	0.0729717	1.12509	0.260551	0.360021	ENSRNOG00000064721	Rgmb	repulsive guidance molecule BMP co-receptor b [Source:RGD Symbol;Acc:1595392]
ENSRNOG00000018878	1236.19	0.32731	0.0741526	4.41401	1.01474e-05	4.68968e-05	ENSRNOG00000018878	Ssh3	slingshot protein phosphatase 3 [Source:RGD Symbol;Acc:1308679]
ENSRNOG00000014852	448.123	0.75927	0.0869385	8.73341	2.47098e-18	8.73019e-17	ENSRNOG00000014852	Fbxo30	F-box protein 30 [Source:RGD Symbol;Acc:1359367]
ENSRNOG00000037715	513.813	0.0057966	0.0772442	0.0750425	0.940181	0.959003	ENSRNOG00000037715	Actmap	actin maturation protease [Source:RGD Symbol;Acc:1560854]
ENSRNOG00000020793	726.063	-0.321048	0.0758831	-4.23082	2.32841e-05	9.8978e-05	ENSRNOG00000020793	Ruvbl2	RuvB-like AAA ATPase 2 [Source:RGD Symbol;Acc:1306509]
ENSRNOG00000047145	569.228	0.566271	0.0734855	7.70588	1.2994e-14	2.62793e-13	ENSRNOG00000047145	LOC102551340	zinc finger protein 728-like [Source:RGD Symbol;Acc:7697243]
ENSRNOG00000065613	24.804	2.32263	0.472195	4.91879	8.70808e-07	4.95882e-06	ENSRNOG00000065613	LOC102556715	uncharacterized LOC102556715 [Source:RGD Symbol;Acc:7749586]
ENSRNOG00000019442	365.421	-0.390646	0.136925	-2.85299	0.00433097	0.0108957	ENSRNOG00000019442	Josd2	Josephin domain containing 2 [Source:RGD Symbol;Acc:1307305]
ENSRNOG00000015152	71.1693	-0.55276	0.196626	-2.81123	0.0049352	0.0122252	ENSRNOG00000015152	Pkp3	plakophilin 3 [Source:RGD Symbol;Acc:1309133]
[truncated: 14,044 more rows]

## Sheet: genotype_5m
ensembl_geneID	baseMean	log2FoldChange	lfcSE	stat	pvalue	padj	ensembl	rgd_symbol	description
[truncated: 14,521 more rows]

## Sheet: genotype_12m
ensembl_geneID	baseMean	log2FoldChange	lfcSE	stat	pvalue	padj	ensembl	rgd_symbol	description
[truncated: 14,521 more rows]

[truncated: 1 more sheets: interaction]
