# Supplementary material for: Brain region-specific and systemic transcriptomic alterations in a human alpha-synuclein overexpressing rat model
Source: Aging (Albany NY). 2025 Oct 20;17(10):2598–636. doi: 10.18632/aging.206331 (PMC12606970; doi:10.18632/aging.206331)
Supplement: Supplementary Table 6 [file aging-17-10-206331-s007.xlsx]

## Sheet: age_WT
Supplementary Table 6. Cortical differential gene expression analysis results for each comparison.
ensembl_geneID	baseMean	log2FoldChange	lfcSE	stat	pvalue	padj	ensembl	rgd_symbol	description
ENSRNOG00000070901	3170.3	-0.124668	0.0606862	-2.0543	0.0399462	0.102079	ENSRNOG00000070901	Irgq	immunity-related GTPase Q [Source:RGD Symbol;Acc:1309409]
ENSRNOG00000018029	109.555	0.0472451	0.203228	0.232473	0.816171	0.887683	ENSRNOG00000018029	Doc2g	double C2-like domains, gamma [Source:RGD Symbol;Acc:1307473]
ENSRNOG00000032625	249.221	0.126095	0.140877	0.895069	0.37075	0.534246	ENSRNOG00000032625	Zfp108	zinc finger protein 108 [Source:RGD Symbol;Acc:1564214]
ENSRNOG00000029315	98.0168	0.147026	0.195686	0.751338	0.452449	0.610033	ENSRNOG00000029315	LOC690251	similar to SUMO/sentrin specific protease 5 [Source:RGD Symbol;Acc:1582860]
ENSRNOG00000016356	8427.29	0.157781	0.0675362	2.33624	0.0194787	0.0581513	ENSRNOG00000016356	Got1	glutamic-oxaloacetic transaminase 1 [Source:RGD Symbol;Acc:2721]
ENSRNOG00000015810	32.286	-0.022816	0.36719	-0.0621369	0.950454	0.972353	ENSRNOG00000015810	Trip13	thyroid hormone receptor interactor 13 [Source:RGD Symbol;Acc:1308516]
ENSRNOG00000017538	87.6995	0.401553	0.21067	1.90607	0.0566409	0.133986	ENSRNOG00000017538	Lrrc27	leucine rich repeat containing 27 [Source:RGD Symbol;Acc:1559981]
ENSRNOG00000027204	1741.26	-0.435682	0.0860062	-5.06571	4.06885e-07	5.83983e-06	ENSRNOG00000027204	Map6	microtubule-associated protein 6 [Source:RGD Symbol;Acc:61804]
ENSRNOG00000070886	1110	0.313604	0.076702	4.0886	4.33979e-05	0.000355602	ENSRNOG00000070886
ENSRNOG00000014903	2424.51	0.068633	0.0574226	1.19523	0.231998	0.385449	ENSRNOG00000014903	Zfyve27	zinc finger FYVE-type containing 27 [Source:RGD Symbol;Acc:735177]
ENSRNOG00000021051	1873.04	-0.109539	0.0621799	-1.76165	0.0781279	0.172048	ENSRNOG00000021051	Cyth2	cytohesin 2 [Source:RGD Symbol;Acc:620398]
ENSRNOG00000011160	10378.2	0.156947	0.0913949	1.71725	0.0859344	0.18522	ENSRNOG00000011160	Sv2b	synaptic vesicle glycoprotein 2b [Source:RGD Symbol;Acc:619716]
ENSRNOG00000017748	64.2258	-0.653213	0.284955	-2.29234	0.0218862	0.0637207	ENSRNOG00000017748	Nkx6-2	NK6 homeobox 2 [Source:RGD Symbol;Acc:1307280]
ENSRNOG00000016227	2149.01	-0.188592	0.0672268	-2.80531	0.00502687	0.0195553	ENSRNOG00000016227	Glrx3	glutaredoxin 3 [Source:RGD Symbol;Acc:69414]
ENSRNOG00000016906	63.519	0.0632456	0.264457	0.239153	0.810987	0.884205	ENSRNOG00000016906	Lipt2	lipoyl(octanoyl) transferase 2 [Source:RGD Symbol;Acc:1305211]
ENSRNOG00000027582	1180	-0.23413	0.126823	-1.84611	0.0648756	0.148632	ENSRNOG00000027582	Dpysl4	dihydropyrimidinase-like 4 [Source:RGD Symbol;Acc:2409]
ENSRNOG00000009830	305.795	0.470104	0.117395	4.00446	6.21588e-05	0.00048387	ENSRNOG00000009830	Fam204a	family with sequence similarity 204, member A [Source:RGD Symbol;Acc:1305500]
ENSRNOG00000013767	105.628	-0.397511	0.208905	-1.90283	0.0570625	0.134658	ENSRNOG00000013767	Ccdc61	coiled-coil domain containing 61 [Source:RGD Symbol;Acc:1307390]
ENSRNOG00000067619	31.0446	0.477635	0.396001	1.20614	0.227762	0.380492	ENSRNOG00000067619
ENSRNOG00000032699	24757.2	-0.190644	0.0750122	-2.54151	0.0110375	0.036935	ENSRNOG00000032699	Ttyh1	tweety family member 1 [Source:RGD Symbol;Acc:1310103]
ENSRNOG00000018408	570.834	-0.0584858	0.102251	-0.571985	0.567332	0.708057	ENSRNOG00000018408	RGD1307554	similar to CG16812-PA [Source:RGD Symbol;Acc:1307554]
ENSRNOG00000018334	135.306	-0.368929	0.170475	-2.16412	0.0304553	0.0827359	ENSRNOG00000018334	Ctu1	cytosolic thiouridylase subunit 1 [Source:RGD Symbol;Acc:1308740]
ENSRNOG00000067907	433.727	-0.184785	0.146336	-1.26275	0.206679	0.355603	ENSRNOG00000067907
ENSRNOG00000023407	413.757	-0.211649	0.104777	-2.02	0.0433832	0.109042	ENSRNOG00000023407	Mrpl36	mitochondrial ribosomal protein L36 [Source:RGD Symbol;Acc:1306375]
ENSRNOG00000010529	35.9635	-0.42487	0.407001	-1.0439	0.296531	0.456638	ENSRNOG00000010529	Thbs2	thrombospondin 2 [Source:RGD Symbol;Acc:1310979]
ENSRNOG00000012684	846.701	-0.203376	0.080997	-2.5109	0.0120423	0.0396295	ENSRNOG00000012684	Bloc1s2	biogenesis of lysosomal organelles complex-1, subunit 2 [Source:RGD Symbol;Acc:1306551]
ENSRNOG00000014258	66.2333	0.526341	0.254351	2.06935	0.038513	0.0993994	ENSRNOG00000014258	Rab32	RAB32, member RAS oncogene family [Source:RGD Symbol;Acc:1559997]
ENSRNOG00000010918	132.505	-0.205542	0.196754	-1.04467	0.296177	0.456443	ENSRNOG00000010918	Cebpa	CCAAT/enhancer binding protein alpha [Source:RGD Symbol;Acc:2326]
ENSRNOG00000067027	56.4514	0.412868	0.281142	1.46854	0.141958	0.269974	ENSRNOG00000067027	LOC108349691	histone H3.3-like [Source:RGD Symbol;Acc:11381356]
ENSRNOG00000019416	749.433	0.123906	0.107184	1.15601	0.247677	0.403515	ENSRNOG00000019416	Zfp61	zinc finger protein 94 [Source:RGD Symbol;Acc:1560430]
ENSRNOG00000014946	1215.29	0.0858861	0.0754051	1.139	0.254705	0.410821	ENSRNOG00000014946	Thumpd1	THUMP domain containing 1 [Source:RGD Symbol;Acc:1308854]
ENSRNOG00000020318	421.773	-0.0658895	0.118127	-0.557784	0.576992	0.716281	ENSRNOG00000020318	Pnkp	polynucleotide kinase 3'-phosphatase [Source:RGD Symbol;Acc:1303331]
ENSRNOG00000047406	280.634	0.0340139	0.127799	0.266151	0.790123	0.871412	ENSRNOG00000047406	Cfap90	cilia and flagella associated protein 90 [Source:RGD Symbol;Acc:1308544]
ENSRNOG00000050445	4407.27	-0.180142	0.0503618	-3.57695	0.000347628	0.00211907	ENSRNOG00000050445	Gde1	glycerophosphodiester phosphodiesterase 1 [Source:RGD Symbol;Acc:621788]
ENSRNOG00000013945	349.886	-0.26642	0.126708	-2.10262	0.035499	0.0932492	ENSRNOG00000013945	Itpkc	inositol-trisphosphate 3-kinase C [Source:RGD Symbol;Acc:631336]
ENSRNOG00000031947	53.4057	-0.0452073	0.264474	-0.170933	0.864276	0.917927	ENSRNOG00000031947	LOC100361060	ribosomal protein L36-like [Source:RGD Symbol;Acc:2320900]
ENSRNOG00000016565	133.864	-0.316789	0.175235	-1.80779	0.0706395	0.15923	ENSRNOG00000016565	Zfp524	zinc finger protein 524 [Source:RGD Symbol;Acc:1565485]
ENSRNOG00000019138	834.395	-0.207317	0.0820711	-2.52606	0.0115348	0.0383026	ENSRNOG00000019138	Clec11a	C-type lectin domain containing 11A [Source:RGD Symbol;Acc:3627]
ENSRNOG00000065728	48.1016	-0.0800017	0.29007	-0.275801	0.782701	0.866542	ENSRNOG00000065728
ENSRNOG00000065649	239.339	-0.0244335	0.139769	-0.174813	0.861227	0.916045	ENSRNOG00000065649	Zfp94	zinc finger protein 94 [Source:RGD Symbol;Acc:1560430]
ENSRNOG00000064423	54.3746	2.2402	0.376229	5.95436	2.61086e-09	6.32156e-08	ENSRNOG00000064423	LOC685793	similar to serine/threonine kinase [Source:RGD Symbol;Acc:1590175]
ENSRNOG00000016574	486.695	-0.263063	0.0973925	-2.70106	0.00691184	0.0253705	ENSRNOG00000016574	Fiz1	FLT3-interacting zinc finger 1 [Source:RGD Symbol;Acc:1306359]
ENSRNOG00000055971	218.615	-0.0636254	0.135719	-0.468804	0.63921	0.765084	ENSRNOG00000055971	AABR07000544.1
ENSRNOG00000055608	1440.36	-0.178575	0.059824	-2.985	0.0028358	0.0122008	ENSRNOG00000055608	LOC102548695	zinc finger protein 45-like [Source:RGD Symbol;Acc:7529325]
ENSRNOG00000013641	24.6872	-0.64465	0.384009	-1.67874	0.0932029	0.197349	ENSRNOG00000013641	Myo7a	myosin VIIA [Source:RGD Symbol;Acc:628830]
ENSRNOG00000020347	1071.76	0.0132191	0.0746071	0.177182	0.859365	0.9148	ENSRNOG00000020347	Nup98	nucleoporin 98 and 96 precursor [Source:RGD Symbol;Acc:71033]
ENSRNOG00000065259	91.3351	-0.313009	0.219712	-1.42463	0.154264	0.286525	ENSRNOG00000065259
ENSRNOG00000066571	24.5621	0.842562	0.428786	1.96499	0.0494148	0.12013	ENSRNOG00000066571
ENSRNOG00000016608	126.563	-0.379935	0.190267	-1.99685	0.0458409	0.113555	ENSRNOG00000016608	Zfp579	zinc finger protein 579 [Source:RGD Symbol;Acc:1308475]
ENSRNOG00000012730	176.15	-0.17969	0.152598	-1.17753	0.238983	0.393799	ENSRNOG00000012730	Lrrk1	leucine-rich repeat kinase 1 [Source:RGD Symbol;Acc:1308000]
ENSRNOG00000018117	3505.65	-0.278689	0.0583152	-4.77901	1.76163e-06	2.14505e-05	ENSRNOG00000018117	Ndufv1	NADH:ubiquinone oxidoreductase core subunit V1 [Source:RGD Symbol;Acc:1359247]
ENSRNOG00000016362	134.282	-0.476228	0.210727	-2.25993	0.0238255	0.0681118	ENSRNOG00000016362	Gpr4	G protein-coupled receptor 4 [Source:RGD Symbol;Acc:1311604]
ENSRNOG00000017307	156.174	0.296236	0.169648	1.74618	0.0807801	0.176644	ENSRNOG00000017307	Prss23	serine protease 23 [Source:RGD Symbol;Acc:1359545]
ENSRNOG00000020942	48.4246	0.0357189	0.291939	0.122351	0.902621	0.942845	ENSRNOG00000020942	Plekha4	pleckstrin homology domain containing A4 [Source:RGD Symbol;Acc:735133]
ENSRNOG00000017079	4432.83	0.5268	0.0799922	6.58565	4.52913e-11	1.6355e-09	ENSRNOG00000017079	Pgm2l1	phosphoglucomutase 2-like 1 [Source:RGD Symbol;Acc:1583226]
ENSRNOG00000017795	1314.27	-0.2105	0.0965386	-2.18048	0.029222	0.0800513	ENSRNOG00000017795	Hspbp1	HSPA (Hsp70) binding protein 1 [Source:RGD Symbol;Acc:628677]
ENSRNOG00000052607	21.1088	1.24831	0.465959	2.67901	0.00738398	0.0267368	ENSRNOG00000052607	Snora12	small nucleolar RNA, H/ACA box 12 [Source:RGD Symbol;Acc:41366654]
ENSRNOG00000052319	589.412	0.186921	0.097808	1.9111	0.0559915	0.132877	ENSRNOG00000052319	AABR07004881.1
ENSRNOG00000027542	93.4687	-0.118216	0.227827	-0.518884	0.603842	0.738386	ENSRNOG00000027542	LOC100302465	hypothetical LOC100302465 [Source:RGD Symbol;Acc:2311471]
ENSRNOG00000065457	78.151	0.791659	0.3085	2.56616	0.0102833	0.0348957	ENSRNOG00000065457
ENSRNOG00000021478	578.935	-0.0718996	0.10219	-0.703591	0.481688	0.635875	ENSRNOG00000021478	Tpd52l1	TPD52 like 1 [Source:RGD Symbol;Acc:1594796]
ENSRNOG00000018090	2755.24	-0.0878354	0.0528113	-1.66319	0.0962741	0.202019	ENSRNOG00000018090	Ppp6r1	protein phosphatase 6, regulatory subunit 1 [Source:RGD Symbol;Acc:1311409]
ENSRNOG00000069157	164.364	-0.141837	0.159875	-0.887177	0.374984	0.538302	ENSRNOG00000069157	Chchd4	coiled-coil-helix-coiled-coil-helix domain containing 4 [Source:RGD Symbol;Acc:1310746]
ENSRNOG00000015230	342.005	0.141512	0.111729	1.26656	0.205311	0.354061	ENSRNOG00000015230	Ermard	ER membrane-associated RNA degradation [Source:RGD Symbol;Acc:1309374]
ENSRNOG00000017069	1467.72	-0.20881	0.0725244	-2.87917	0.00398725	0.0162194	ENSRNOG00000017069	Mark4	microtubule affinity regulating kinase 4 [Source:RGD Symbol;Acc:1591792]
ENSRNOG00000021013	327.826	0.347115	0.125754	2.76026	0.00577548	0.0219221	ENSRNOG00000021013	Stx3	syntaxin 3 [Source:RGD Symbol;Acc:621005]
ENSRNOG00000066830	23.0494	0.653431	0.390989	1.67123	0.0946769	0.199465	ENSRNOG00000066830
ENSRNOG00000018677	1948.54	-0.382955	0.071044	-5.39039	7.03043e-08	1.23301e-06	ENSRNOG00000018677	Akt2	AKT serine/threonine kinase 2 [Source:RGD Symbol;Acc:2082]
ENSRNOG00000019207	17440.2	-0.283659	0.0680048	-4.17115	3.03061e-05	0.000259713	ENSRNOG00000019207	Shank1	SH3 and multiple ankyrin repeat domains 1 [Source:RGD Symbol;Acc:621011]
ENSRNOG00000070234	258.687	0.726788	0.136868	5.31016	1.09531e-07	1.84397e-06	ENSRNOG00000070234	Zfp141	zinc finger protein 141 [Source:RGD Symbol;Acc:1597345]
ENSRNOG00000063629	203.364	0.639631	0.152629	4.19076	2.78019e-05	0.000241349	ENSRNOG00000063629
ENSRNOG00000016714	20.3883	-0.0483479	0.455066	-0.106244	0.915389	0.950251	ENSRNOG00000016714	Nrap	nebulin-related anchoring protein [Source:RGD Symbol;Acc:1306731]
ENSRNOG00000067256	42.6703	3.57974	0.454925	7.86884	3.57935e-15	2.93887e-13	ENSRNOG00000067256
ENSRNOG00000015734	750.121	1.14332	0.113576	10.0666	7.7654e-24	2.15336e-21	ENSRNOG00000015734	Ube3a	ubiquitin protein ligase E3A [Source:RGD Symbol;Acc:1306361]
ENSRNOG00000068800	351.874	0.33863	0.137318	2.46604	0.0136618	0.0436684	ENSRNOG00000068800
ENSRNOG00000069276	191.663	0.600111	0.148391	4.04413	5.25183e-05	0.000419035	ENSRNOG00000069276	LOC102548320	zinc finger protein 845-like [Source:RGD Symbol;Acc:7683572]
ENSRNOG00000062961	65.1861	1.01548	0.310359	3.27195	0.00106808	0.00541811	ENSRNOG00000062961
ENSRNOG00000049772	212.012	-0.0412868	0.140282	-0.294312	0.768519	0.857496	ENSRNOG00000049772	Gemin7	gem (nuclear organelle) associated protein 7 [Source:RGD Symbol;Acc:1597035]
ENSRNOG00000053859	796.142	0.33761	0.118611	2.84636	0.00442227	0.0176088	ENSRNOG00000053859	Ranbp6	RAN binding protein 6 [Source:RGD Symbol;Acc:1305165]
ENSRNOG00000066647	21.6926	-0.0892182	0.439705	-0.202905	0.83921	0.901994	ENSRNOG00000066647
ENSRNOG00000066887	104.135	0.50274	0.209383	2.40106	0.0163478	0.0505392	ENSRNOG00000066887	LOC102556805	rho GTPase-activating protein 20-like [Source:RGD Symbol;Acc:7734973]
ENSRNOG00000018915	29.2168	-0.448316	0.364041	-1.2315	0.218136	0.368754	ENSRNOG00000018915	Tagap	T-cell activation RhoGTPase activating protein [Source:RGD Symbol;Acc:1308618]
ENSRNOG00000020358	2051.98	0.235632	0.107105	2.20001	0.0278063	0.0770058	ENSRNOG00000020358	Ptov1	PTOV1, extended AT-hook containing adaptor protein [Source:RGD Symbol;Acc:1306977]
ENSRNOG00000053502	3658.21	-0.166548	0.0759192	-2.19375	0.0282531	0.0780078	ENSRNOG00000053502	Arhgef17	Rho guanine nucleotide exchange factor 17 [Source:RGD Symbol;Acc:1309890]
ENSRNOG00000021442	178.328	0.0825201	0.146718	0.562441	0.573816	0.713318	ENSRNOG00000021442	Hddc2	HD domain containing 2 [Source:RGD Symbol;Acc:1307562]
ENSRNOG00000066023	234.18	0.575023	0.138618	4.14826	3.35009e-05	0.000283783	ENSRNOG00000066023
ENSRNOG00000014278	483.814	0.0565316	0.107057	0.52805	0.597465	0.73364	ENSRNOG00000014278	Zfp710	zinc finger protein 710 [Source:RGD Symbol;Acc:1306491]
ENSRNOG00000022921	2873.37	-0.381346	0.0963906	-3.95625	7.6134e-05	0.0005747	ENSRNOG00000022921	Dact2	dishevelled-binding antagonist of beta-catenin 2 [Source:RGD Symbol;Acc:1310742]
ENSRNOG00000037360	32.8892	0.541663	0.334115	1.62118	0.104978	0.215583	ENSRNOG00000037360	AABR07003173.1
ENSRNOG00000015902	38.6713	-0.856823	0.35594	-2.40721	0.0160749	0.0498529	ENSRNOG00000015902	Cpxm2	carboxypeptidase X (M14 family), member 2 [Source:RGD Symbol;Acc:1310955]
ENSRNOG00000065017	48.6184	0.478491	0.314319	1.52231	0.127931	0.250127	ENSRNOG00000065017
ENSRNOG00000020624	1385.41	0.642667	0.0759991	8.45624	2.76128e-17	3.2466e-15	ENSRNOG00000020624	Acadsb	acyl-CoA dehydrogenase, short/branched chain [Source:RGD Symbol;Acc:2013]
ENSRNOG00000013981	3691.6	0.0564121	0.0714446	0.789593	0.429766	0.591134	ENSRNOG00000013981	Ptpn5	protein tyrosine phosphatase, non-receptor type 5 [Source:RGD Symbol;Acc:3448]
ENSRNOG00000065346	72.2387	0.307084	0.253276	1.21245	0.22534	0.377674	ENSRNOG00000065346
ENSRNOG00000062884	23.1665	1.23869	0.509844	2.42955	0.0151176	0.0474548	ENSRNOG00000062884
ENSRNOG00000019942	27.6166	0.36677	0.391522	0.936779	0.348872	0.51197	ENSRNOG00000019942	Fbxo17	F-box protein 17 [Source:RGD Symbol;Acc:1308308]
ENSRNOG00000059083	157.668	-0.39556	0.390137	-1.0139	0.31063	0.472406	ENSRNOG00000059083	LOC120100370	small nucleolar RNA SNORA44 [Source:RGD Symbol;Acc:41111402]
ENSRNOG00000030818	814.128	0.17466	0.0850234	2.05426	0.039951	0.102079	ENSRNOG00000030818	C1h11orf42	similar to human chromosome 11 open reading frame 42 [Source:RGD Symbol;Acc:1561034]
ENSRNOG00000071202	35.9682	1.3772	0.408746	3.36934	0.000753484	0.00403717	ENSRNOG00000071202
ENSRNOG00000064515	891.078	0.0883645	0.0760077	1.16257	0.245003	0.400357	ENSRNOG00000064515
ENSRNOG00000017930	852.955	-0.10006	0.0946946	-1.05666	0.290666	0.450055	ENSRNOG00000017930	Lpcat1	lysophosphatidylcholine acyltransferase 1 [Source:RGD Symbol;Acc:1311599]
ENSRNOG00000063371	146.338	-0.334958	0.165954	-2.01838	0.0435513	0.109346	ENSRNOG00000063371
ENSRNOG00000068809	234.803	0.242267	0.135315	1.79039	0.0733913	0.163951	ENSRNOG00000068809
ENSRNOG00000019869	822.499	-0.168004	0.10334	-1.62575	0.104003	0.2139	ENSRNOG00000019869	Lrfn1	leucine rich repeat and fibronectin type III domain containing 1 [Source:RGD Symbol;Acc:1304707]
ENSRNOG00000067318	210.274	-0.221195	0.153787	-1.43832	0.150344	0.281049	ENSRNOG00000067318
ENSRNOG00000023411	317.036	-0.0277335	0.120878	-0.229433	0.818533	0.888889	ENSRNOG00000023411	Vsig10l	V-set and immunoglobulin domain containing 10 like [Source:RGD Symbol;Acc:1564982]
ENSRNOG00000046005	91001.5	-0.13913	0.0825979	-1.68442	0.0921005	0.195522	ENSRNOG00000046005	Scd2	stearoyl-Coenzyme A desaturase 2 [Source:RGD Symbol;Acc:621177]
ENSRNOG00000018686	2159.27	0.190286	0.0864512	2.20108	0.0277302	0.076853	ENSRNOG00000018686	Atxn2l	ataxin 2-like [Source:RGD Symbol;Acc:1565868]
ENSRNOG00000063261	244.129	0.0388188	0.137386	0.282553	0.77752	0.863082	ENSRNOG00000063261
ENSRNOG00000069563	27.3068	0.135815	0.373926	0.363213	0.716446	0.820765	ENSRNOG00000069563
ENSRNOG00000017408	821.501	0.0302979	0.106821	0.283631	0.776693	0.862686	ENSRNOG00000017408	Fhip1b	FHF complex subunit HOOK interacting protein 1B [Source:RGD Symbol;Acc:1359585]
ENSRNOG00000021794	240.358	-0.236131	0.158765	-1.48729	0.136937	0.262463	ENSRNOG00000021794	Znhit2	zinc finger, HIT-type containing 2 [Source:RGD Symbol;Acc:1307918]
ENSRNOG00000069938	29.9419	0.136744	0.385275	0.354926	0.722645	0.825487	ENSRNOG00000069938
ENSRNOG00000013949	1598.8	-0.25005	0.0760369	-3.28854	0.0010071	0.00516213	ENSRNOG00000013949	Idh2	isocitrate dehydrogenase (NADP(+)) 2 [Source:RGD Symbol;Acc:1597139]
ENSRNOG00000065858	140.233	0.655992	0.169708	3.86542	0.000110896	0.000797378	ENSRNOG00000065858
ENSRNOG00000016103	268.126	-0.375294	0.149506	-2.51023	0.0120653	0.0396874	ENSRNOG00000016103	Nkd2	NKD inhibitor of WNT signaling pathway 2 [Source:RGD Symbol;Acc:1311459]
ENSRNOG00000020643	760.91	-0.175125	0.0952214	-1.83914	0.0658953	0.150504	ENSRNOG00000020643	Bub3	BUB3 mitotic checkpoint protein [Source:RGD Symbol;Acc:1306654]
ENSRNOG00000018217	85.7971	0.0112999	0.221461	0.051024	0.959306	0.977859	ENSRNOG00000018217	Syt5	synaptotagmin 5 [Source:RGD Symbol;Acc:3806]
ENSRNOG00000058790	1864.63	-0.0645276	0.0596458	-1.08185	0.279321	0.437513	ENSRNOG00000058790	Fam120b	family with sequence similarity 120B [Source:RGD Symbol;Acc:1310304]
ENSRNOG00000020371	85.4092	-0.140727	0.231228	-0.608609	0.542784	0.688588	ENSRNOG00000020371	Pgap2	post-GPI attachment to proteins 2 [Source:RGD Symbol;Acc:619744]
ENSRNOG00000014996	137.749	-0.136453	0.17382	-0.785028	0.432437	0.593531	ENSRNOG00000014996	Katna1	katanin catalytic subunit A1 [Source:RGD Symbol;Acc:1303062]
ENSRNOG00000067296	340.597	0.140761	0.111535	1.26204	0.206935	0.355919	ENSRNOG00000067296	LOC108348090	zinc finger protein OZF-like [Source:RGD Symbol;Acc:11436011]
ENSRNOG00000017914	348.541	-0.517445	0.144734	-3.57516	0.000350019	0.00213169	ENSRNOG00000017914	Cavin3	caveolae associated protein 3 [Source:RGD Symbol;Acc:628755]
ENSRNOG00000014705	84.8289	0.0509649	0.271182	0.187936	0.850927	0.909003	ENSRNOG00000014705	Rbm20	RNA binding motif protein 20 [Source:RGD Symbol;Acc:1307427]
ENSRNOG00000070027	234.639	-0.396958	0.141798	-2.79947	0.0051186	0.019823	ENSRNOG00000070027
ENSRNOG00000009932	130.655	0.150246	0.20696	0.725963	0.467862	0.623292	ENSRNOG00000009932	Mctp2	multiple C2 and transmembrane domain containing 2 [Source:RGD Symbol;Acc:1562967]
ENSRNOG00000020865	90.4268	-0.405405	0.243922	-1.66203	0.0965076	0.202336	ENSRNOG00000020865	Ano1	anoctamin 1 [Source:RGD Symbol;Acc:1310786]
ENSRNOG00000020714	410.57	0.0205366	0.115844	0.177278	0.85929	0.9148	ENSRNOG00000020714	Trpm4	transient receptor potential cation channel, subfamily M, member 4 [Source:RGD Symbol;Acc:620244]
ENSRNOG00000015825	554.353	0.343305	0.101466	3.38345	0.0007158	0.00387196	ENSRNOG00000015825	Aurkc	aurora kinase C [Source:RGD Symbol;Acc:1309573]
ENSRNOG00000014840	70.0266	0.490145	0.300192	1.63277	0.102517	0.211525	ENSRNOG00000014840	Gna14	G protein subunit alpha 14 [Source:RGD Symbol;Acc:1308122]
ENSRNOG00000064970	119.275	0.292623	0.215195	1.3598	0.173892	0.313669	ENSRNOG00000064970	Zfp939	zinc finger protein 939 [Source:RGD Symbol;Acc:1584032]
ENSRNOG00000030127	2463.21	-0.194159	0.0706492	-2.74821	0.00599208	0.0225636	ENSRNOG00000030127	Eml2	EMAP like 2 [Source:RGD Symbol;Acc:621066]
ENSRNOG00000027098	6185.5	-0.243342	0.0720808	-3.37596	0.000735575	0.00396579	ENSRNOG00000027098	Sez6l2	seizure related 6 homolog like 2 [Source:RGD Symbol;Acc:1565281]
ENSRNOG00000017311	863.51	0.0276583	0.102453	0.26996	0.787191	0.869297	ENSRNOG00000017311	Me3	malic enzyme 3 [Source:RGD Symbol;Acc:1311070]
ENSRNOG00000019270	76.0665	-0.534783	0.258643	-2.06765	0.0386727	0.0997496	ENSRNOG00000019270	P2ry6	pyrimidinergic receptor P2Y6 [Source:RGD Symbol;Acc:620269]
ENSRNOG00000066986	144.859	0.279193	0.183371	1.52256	0.127869	0.250117	ENSRNOG00000066986	Zfp619	zinc finger protein 619 [Source:RGD Symbol;Acc:7710512]
ENSRNOG00000018762	69.1082	-0.162993	0.248327	-0.656362	0.511591	0.661616	ENSRNOG00000018762	Rsph3	radial spoke head 3 [Source:RGD Symbol;Acc:1311306]
ENSRNOG00000015956	1857.25	0.344639	0.0695525	4.95509	7.22981e-07	9.70459e-06	ENSRNOG00000015956	Usp29	ubiquitin specific peptidase 29 [Source:RGD Symbol;Acc:1306648]
ENSRNOG00000018019	6719.24	-0.024901	0.0625964	-0.397803	0.690775	0.802238	ENSRNOG00000018019	Hspa12a	heat shock protein family A (Hsp70) member 12A [Source:RGD Symbol;Acc:1305531]
ENSRNOG00000046036	46.4272	0.179973	0.301517	0.596892	0.550579	0.694223	ENSRNOG00000046036	Itprip	inositol 1,4,5-trisphosphate receptor interacting protein [Source:RGD Symbol;Acc:6488464]
ENSRNOG00000016372	110.221	-0.330809	0.206153	-1.60468	0.108564	0.221239	ENSRNOG00000016372	Slc12a7	solute carrier family 12 member 7 [Source:RGD Symbol;Acc:1359672]
ENSRNOG00000064277	35.0505	-0.0473122	0.395058	-0.11976	0.904673	0.943981	ENSRNOG00000064277
ENSRNOG00000068327	596.646	-0.334532	0.0935821	-3.57474	0.00035057	0.00213347	ENSRNOG00000068327	Pdcd5	programmed cell death 5 [Source:RGD Symbol;Acc:1310561]
ENSRNOG00000019812	1011.78	-0.384496	0.082538	-4.65841	3.18663e-06	3.60816e-05	ENSRNOG00000019812	Nr1h2	nuclear receptor subfamily 1, group H, member 2 [Source:RGD Symbol;Acc:61906]
ENSRNOG00000070842	49.3763	0.146496	0.284867	0.514261	0.60707	0.740608	ENSRNOG00000070842
ENSRNOG00000025940	1711.67	-0.0399257	0.0803188	-0.49709	0.619126	0.749653	ENSRNOG00000025940	Mettl9	methyltransferase like 9 [Source:RGD Symbol;Acc:2311609]
ENSRNOG00000020393	621.554	-0.619229	0.09519	-6.50519	7.7596e-11	2.64601e-09	ENSRNOG00000020393	Rhog	ras homolog family member G [Source:RGD Symbol;Acc:621310]
ENSRNOG00000067076	144.801	-0.211041	0.180808	-1.16721	0.243125	0.39844	ENSRNOG00000067076	Frat1	FRAT regulator of WNT signaling pathway 1 [Source:RGD Symbol;Acc:9147096]
ENSRNOG00000014969	492.529	-0.304538	0.0891274	-3.41689	0.000633419	0.00349319	ENSRNOG00000014969	Lzts2	leucine zipper tumor suppressor 2 [Source:RGD Symbol;Acc:1359249]
ENSRNOG00000010840	43.8042	0.846812	0.35502	2.38525	0.0170674	0.0522295	ENSRNOG00000010840	Adamtsl3	ADAMTS-like 3 [Source:RGD Symbol;Acc:1305155]
ENSRNOG00000067278	385.857	0.254829	0.157809	1.61479	0.106356	0.217704	ENSRNOG00000067278	LOC108349532	high mobility group protein B1 pseudogene [Source:RGD Symbol;Acc:11382437]
ENSRNOG00000010308	154.18	0.00724475	0.166374	0.043545	0.965267	0.981291	ENSRNOG00000010308	Nr2f2	nuclear receptor subfamily 2, group F, member 2 [Source:RGD Symbol;Acc:69305]
ENSRNOG00000017851	138.03	-0.175546	0.195639	-0.897296	0.369561	0.533069	ENSRNOG00000017851	Etfb	electron transfer flavoprotein subunit beta [Source:RGD Symbol;Acc:1303312]
ENSRNOG00000011439	435.843	0.257791	0.123983	2.07925	0.0375947	0.0974651	ENSRNOG00000011439	Grk5	G protein-coupled receptor kinase 5 [Source:RGD Symbol;Acc:61985]
ENSRNOG00000017635	976.171	-0.0456416	0.0785987	-0.580691	0.561448	0.703005	ENSRNOG00000017635	Inpp5a	inositol polyphosphate-5-phosphatase A [Source:RGD Symbol;Acc:1306168]
ENSRNOG00000056397	24.5967	0.694383	0.462493	1.50139	0.133254	0.257283	ENSRNOG00000056397	LOC120100233	small nucleolar RNA SNORD22 [Source:RGD Symbol;Acc:40941034]
ENSRNOG00000068081	252.992	0.217568	0.146197	1.48818	0.136703	0.262151	ENSRNOG00000068081
ENSRNOG00000065098	1456.58	0.189042	0.0824773	2.29205	0.021903	0.0637443	ENSRNOG00000065098	Hmgb1-ps4	high-mobility group box 1, pseudogene 4 [Source:RGD Symbol;Acc:1596834]
ENSRNOG00000029394	1162.56	-0.0403496	0.0700267	-0.576203	0.564478	0.705878	ENSRNOG00000029394	Dusp8	dual specificity phosphatase 8 [Source:RGD Symbol;Acc:1306425]
ENSRNOG00000017884	48.7496	0.108615	0.286101	0.379638	0.704214	0.812228	ENSRNOG00000017884	Dnajb6-ps10	DnaJ heat shock protein family (Hsp40) member B6, pseudogene 10 [Source:RGD Symbol;Acc:1583989]
ENSRNOG00000064417	414.987	0.00542801	0.124072	0.0437487	0.965105	0.981194	ENSRNOG00000064417
ENSRNOG00000021082	1337.51	-0.16082	0.0676627	-2.37679	0.0174642	0.0532623	ENSRNOG00000021082	Kdelr1	KDEL endoplasmic reticulum protein retention receptor 1 [Source:RGD Symbol;Acc:1306764]
ENSRNOG00000066269	66.7456	0.775957	0.318739	2.43446	0.0149142	0.0469164	ENSRNOG00000066269
ENSRNOG00000020197	188.125	-0.364914	0.157648	-2.31474	0.0206273	0.0608509	ENSRNOG00000020197	Cd248	endosialin [Source:RGD Symbol;Acc:11367424]
ENSRNOG00000016687	79.6367	-0.0274617	0.242332	-0.113323	0.909775	0.946885	ENSRNOG00000016687	Ssc5d	scavenger receptor cysteine rich family member with 5 domains [Source:RGD Symbol;Acc:1565772]
ENSRNOG00000059984	69.4293	-0.0661614	0.245181	-0.269847	0.787278	0.869297	ENSRNOG00000059984	Dll1	delta like canonical Notch ligand 1 [Source:RGD Symbol;Acc:70949]
ENSRNOG00000020363	1440.11	-0.332086	0.0784663	-4.23221	2.31406e-05	0.000204755	ENSRNOG00000020363	Med25	mediator complex subunit 25 [Source:RGD Symbol;Acc:1305137]
ENSRNOG00000020871	695.329	-0.281796	0.108115	-2.60645	0.00914856	0.0317489	ENSRNOG00000020871	Ltbp4	latent transforming growth factor beta binding protein 4 [Source:RGD Symbol;Acc:1307033]
ENSRNOG00000033843	22.817	-0.0691454	0.407507	-0.169679	0.865263	0.918311	ENSRNOG00000033843	AABR07007121.1
ENSRNOG00000021151	432.824	-0.0665516	0.105699	-0.629635	0.528933	0.676447	ENSRNOG00000021151	Ppp1r14b	protein phosphatase 1, regulatory (inhibitor) subunit 14B [Source:RGD Symbol;Acc:628702]
ENSRNOG00000018310	73.819	0.520732	0.257603	2.02145	0.0432332	0.108745	ENSRNOG00000018310	Eno4	enolase 4 [Source:RGD Symbol;Acc:1308333]
ENSRNOG00000030404	1328.15	0.359756	0.0927163	3.88018	0.000104378	0.000756431	ENSRNOG00000030404	Arrb1	arrestin, beta 1 [Source:RGD Symbol;Acc:2156]
ENSRNOG00000067564	479.06	0.410567	0.110511	3.71516	0.000203076	0.00135173	ENSRNOG00000067564
ENSRNOG00000014004	1410.28	0.209829	0.104583	2.00634	0.0448198	0.111723	ENSRNOG00000014004	Ncoa7	nuclear receptor coactivator 7 [Source:RGD Symbol;Acc:1566426]
ENSRNOG00000047816	461.233	-0.26628	0.0904421	-2.94421	0.00323784	0.0136704	ENSRNOG00000047816	Ccs	copper chaperone for superoxide dismutase [Source:RGD Symbol;Acc:620403]
ENSRNOG00000018433	284.841	-0.108305	0.136418	-0.79392	0.427242	0.589041	ENSRNOG00000018433	Hps6	HPS6, biogenesis of lysosomal organelles complex 2 subunit 3 [Source:RGD Symbol;Acc:631341]
ENSRNOG00000020925	348.528	-0.252649	0.112129	-2.25321	0.024246	0.0690456	ENSRNOG00000020925	Ccdc86	coiled-coil domain containing 86 [Source:RGD Symbol;Acc:1359280]
ENSRNOG00000064594	178.051	0.725414	0.15828	4.58312	4.58087e-06	4.91424e-05	ENSRNOG00000064594
ENSRNOG00000070917	20.1215	0.691125	0.539481	1.28109	0.200161	0.347193	ENSRNOG00000070917	LOC102556098	zinc finger protein 729-like [Source:RGD Symbol;Acc:7732163]
ENSRNOG00000012140	252.943	-0.0379865	0.139241	-0.272812	0.784998	0.868109	ENSRNOG00000012140	Cep89	centrosomal protein 89 [Source:RGD Symbol;Acc:1311730]
ENSRNOG00000014828	587.938	-0.137213	0.101014	-1.35836	0.174349	0.314148	ENSRNOG00000014828	Avpi1	arginine vasopressin-induced 1 [Source:RGD Symbol;Acc:621721]
ENSRNOG00000020497	1588.83	0.248404	0.0736464	3.37292	0.000743752	0.0039943	ENSRNOG00000020497	Plekha1	pleckstrin homology domain containing A1 [Source:RGD Symbol;Acc:1564153]
ENSRNOG00000025154	508.718	0.157005	0.117952	1.3311	0.183157	0.325891	ENSRNOG00000025154	Snu13	NHP2 non-histone chromosome protein 2-like 1-like [Source:RGD Symbol;Acc:2323620]
ENSRNOG00000014448	684.12	0.0715175	0.0931058	0.768132	0.442409	0.602156	ENSRNOG00000014448	Bmal1	basic helix-loop-helix ARNT like 1 [Source:RGD Symbol;Acc:62003]
ENSRNOG00000015753	8388.03	-0.51387	0.0577925	-8.89164	6.02119e-19	8.84934e-17	ENSRNOG00000015753	Epn1	Epsin 1 [Source:RGD Symbol;Acc:619772]
ENSRNOG00000067461	31.0718	0.535953	0.344862	1.55411	0.120158	0.239161	ENSRNOG00000067461	Rps12l2	ribosomal protein S12-like 2 [Source:RGD Symbol;Acc:2321899]
ENSRNOG00000028781	96.0269	-0.467778	0.240912	-1.9417	0.052174	0.125499	ENSRNOG00000028781	Abcc6	ATP binding cassette subfamily C member 6 [Source:RGD Symbol;Acc:620268]
ENSRNOG00000064885	83.4122	0.340701	0.20808	1.63735	0.101557	0.210431	ENSRNOG00000064885
ENSRNOG00000065383	74.9689	0.044125	0.240253	0.183661	0.85428	0.911062	ENSRNOG00000065383
ENSRNOG00000069489	63.9675	-0.149086	0.235578	-0.632852	0.52683	0.674169	ENSRNOG00000069489
ENSRNOG00000019491	1482.85	-0.341589	0.0736388	-4.63871	3.50595e-06	3.9184e-05	ENSRNOG00000019491	Stard10	StAR-related lipid transfer domain containing 10 [Source:RGD Symbol;Acc:1306548]
ENSRNOG00000064994	22.0178	-0.0501848	0.445763	-0.112582	0.910362	0.947222	ENSRNOG00000064994
ENSRNOG00000031381	147.041	-0.153586	0.174822	-0.878529	0.379657	0.542889	ENSRNOG00000031381	RGD1561333	similar to 60S ribosomal protein L8 [Source:RGD Symbol;Acc:1561333]
ENSRNOG00000021153	2323.66	-0.165639	0.0648782	-2.55307	0.0106778	0.0359357	ENSRNOG00000021153	Fkbp2	FKBP prolyl isomerase 2 [Source:RGD Symbol;Acc:1560660]
ENSRNOG00000037137	753.064	0.329015	0.0807796	4.07299	4.64134e-05	0.000376892	ENSRNOG00000037137	Svip	small VCP interacting protein [Source:RGD Symbol;Acc:1565432]
ENSRNOG00000014380	364.759	0.194852	0.125127	1.55724	0.119414	0.238003	ENSRNOG00000014380	LOC102555672	zinc finger protein 850-like [Source:RGD Symbol;Acc:7701959]
ENSRNOG00000017150	476.119	-0.079571	0.120389	-0.660946	0.508647	0.659048	ENSRNOG00000017150	Med10	mediator complex subunit 10 [Source:RGD Symbol;Acc:1310128]
ENSRNOG00000020517	36.5527	0.109937	0.347555	0.316317	0.751762	0.846834	ENSRNOG00000020517	Prrg2	proline rich and Gla domain 2 [Source:RGD Symbol;Acc:1305444]
ENSRNOG00000062805	194.638	-0.252041	0.147171	-1.71257	0.0867914	0.186514	ENSRNOG00000062805	Or14c39	olfactory receptor family 14 subfamily C member 39 [Source:RGD Symbol;Acc:1333763]
ENSRNOG00000015717	270.125	0.414702	0.117129	3.54056	0.000399286	0.00238162	ENSRNOG00000015717	Ptpre	protein tyrosine phosphatase, receptor type, E [Source:RGD Symbol;Acc:620771]
ENSRNOG00000015914	2379.52	-0.106789	0.0573496	-1.86207	0.0625928	0.144665	ENSRNOG00000015914	U2af2	U2 small nuclear RNA auxiliary factor 2 [Source:RGD Symbol;Acc:1310690]
ENSRNOG00000019141	48.7402	0.113061	0.321987	0.351136	0.725486	0.827446	ENSRNOG00000019141	Ch25h	cholesterol 25-hydroxylase [Source:RGD Symbol;Acc:1310575]
ENSRNOG00000067799	147.631	0.329245	0.193613	1.70054	0.0890303	0.190403	ENSRNOG00000067799	Selenow	selenoprotein W [Source:RGD Symbol;Acc:3661]
ENSRNOG00000019582	583.791	0.0752341	0.12421	0.6057	0.544714	0.69019	ENSRNOG00000019582	Mthfd1l	methylenetetrahydrofolate dehydrogenase (NADP+ dependent) 1-like [Source:RGD Symbol;Acc:1307311]
ENSRNOG00000036711	21.7937	-0.522732	0.415636	-1.25767	0.208512	0.357794	ENSRNOG00000036711	Spn	sialophorin [Source:RGD Symbol;Acc:3750]
ENSRNOG00000013149	432.316	-0.00880765	0.110913	-0.0794108	0.936706	0.963182	ENSRNOG00000013149	Vps33b	VPS33B, late endosome and lysosome associated [Source:RGD Symbol;Acc:620644]
ENSRNOG00000018048	1474.39	0.00328799	0.0645292	0.0509535	0.959363	0.977859	ENSRNOG00000018048	Dctn5	dynactin subunit 5 [Source:RGD Symbol;Acc:1305654]
ENSRNOG00000010224	432.674	0.864246	0.118683	7.28196	3.28999e-13	1.85953e-11	ENSRNOG00000010224	Rab30	RAB30, member RAS oncogene family [Source:RGD Symbol;Acc:1309507]
ENSRNOG00000029043	551.01	0.249353	0.0966537	2.57986	0.00988417	0.0337675	ENSRNOG00000029043	Zfp790	zinc finger protein 790 [Source:RGD Symbol;Acc:1309815]
ENSRNOG00000017095	75.4309	0.227786	0.233328	0.976248	0.328942	0.491906	ENSRNOG00000017095	Dlat-ps1	dihydrolipoamide S-acetyltransferase, pseudogene 1 [Source:RGD Symbol;Acc:1583609]
ENSRNOG00000018421	148.085	-0.000529674	0.151764	-0.00349011	0.997215	0.998971	ENSRNOG00000018421	Aen	apoptosis enhancing nuclease [Source:RGD Symbol;Acc:1305051]
ENSRNOG00000019681	95.1383	-0.0245164	0.208698	-0.117473	0.906485	0.945268	ENSRNOG00000019681	Pold1	DNA polymerase delta 1, catalytic subunit [Source:RGD Symbol;Acc:621839]
ENSRNOG00000020202	4043.41	-0.336449	0.0790883	-4.25409	2.09903e-05	0.000188379	ENSRNOG00000020202	Asrgl1	asparaginase and isoaspartyl peptidase 1 [Source:RGD Symbol;Acc:708526]
ENSRNOG00000017613	900.29	0.0269752	0.0809537	0.333218	0.73897	0.836944	ENSRNOG00000017613	Tent4a	terminal nucleotidyltransferase 4A [Source:RGD Symbol;Acc:1307356]
ENSRNOG00000055519	113.252	-0.064571	0.17617	-0.366528	0.713971	0.819144	ENSRNOG00000055519	Zfp790	zinc finger protein 790 [Source:RGD Symbol;Acc:1309815]
ENSRNOG00000011234	31.8798	-0.0210789	0.351331	-0.0599972	0.952158	0.973351	ENSRNOG00000011234	Taf5l-ps1	TATA-box binding protein associated factor 5 like, pseudogene 1 [Source:RGD Symbol;Acc:1582831]
ENSRNOG00000015997	534.456	-0.216747	0.0853113	-2.54066	0.0110645	0.0370168	ENSRNOG00000015997	Ccdc106	coiled-coil domain containing 106 [Source:RGD Symbol;Acc:1566222]
ENSRNOG00000064983	38.9943	-0.242874	0.319323	-0.76059	0.446902	0.605579	ENSRNOG00000064983
ENSRNOG00000055020	90.3979	0.216572	0.244857	0.884482	0.376436	0.539807	ENSRNOG00000055020	LOC679731	hypothetical protein LOC679731 [Source:RGD Symbol;Acc:1584810]
ENSRNOG00000066969	106.27	0.241589	0.204288	1.18259	0.23697	0.391306	ENSRNOG00000066969	Zfp790	zinc finger protein 420-like [Source:RGD Symbol;Acc:150344952]
ENSRNOG00000014251	1322.7	-0.0722144	0.0663312	-1.08869	0.276289	0.434197	ENSRNOG00000014251	Capn5	calpain 5 [Source:RGD Symbol;Acc:620084]
ENSRNOG00000066794	225.671	-0.211086	0.154065	-1.37011	0.170652	0.309142	ENSRNOG00000066794
ENSRNOG00000025539	1315.52	0.746918	0.0838891	8.90364	5.40439e-19	8.02306e-17	ENSRNOG00000025539	Vps13a	vacuolar protein sorting 13 homolog A [Source:RGD Symbol;Acc:1311340]
ENSRNOG00000012716	1051.19	0.186553	0.074677	2.49813	0.0124849	0.0406854	ENSRNOG00000012716	Chd2	chromodomain helicase DNA binding protein 2 [Source:RGD Symbol;Acc:1310056]
ENSRNOG00000063182	264.583	-0.182755	0.115211	-1.58627	0.112678	0.227446	ENSRNOG00000063182
ENSRNOG00000016011	172.341	0.0421819	0.15586	0.270639	0.786668	0.869107	ENSRNOG00000016011	Plekhg1	pleckstrin homology and RhoGEF domain containing G1 [Source:RGD Symbol;Acc:1583676]
ENSRNOG00000020014	914.712	-0.362904	0.090704	-4.00098	6.30819e-05	0.000490018	ENSRNOG00000020014	Myh14	myosin heavy chain 14 [Source:RGD Symbol;Acc:1306821]
ENSRNOG00000055082	2571.07	-0.199097	0.0674768	-2.9506	0.00317155	0.0134562	ENSRNOG00000055082	Maz	MYC associated zinc finger protein [Source:RGD Symbol;Acc:1594632]
ENSRNOG00000019129	61.2163	0.267882	0.247865	1.08076	0.279805	0.438017	ENSRNOG00000019129	Fcgbp	Fc gamma binding protein [Source:RGD Symbol;Acc:2313189]
ENSRNOG00000017960	747.583	-0.0851243	0.0855856	-0.99461	0.319926	0.481462	ENSRNOG00000017960	Deaf1	DEAF1 transcription factor [Source:RGD Symbol;Acc:620671]
ENSRNOG00000056062	99.2722	0.178033	0.185961	0.957367	0.338382	0.501251	ENSRNOG00000056062	LOC100912787	zinc finger protein 850-like [Source:RGD Symbol;Acc:6485475]
ENSRNOG00000052256	5007.34	-0.422481	0.0661602	-6.38572	1.70588e-10	5.35399e-09	ENSRNOG00000052256	Dact3	dishevelled-binding antagonist of beta-catenin 3 [Source:RGD Symbol;Acc:1563892]
ENSRNOG00000011931	4008.25	-0.0142557	0.0532216	-0.267855	0.788811	0.870389	ENSRNOG00000011931	Smarca2	SWI/SNF related, matrix associated, actin dependent regulator of chromatin, subfamily a, member 2 [Source:RGD Symbol;Acc:1302988]
ENSRNOG00000037556	391.166	0.111838	0.106978	1.04543	0.295822	0.456068	ENSRNOG00000037556	Zfp420	zinc finger protein 420 [Source:RGD Symbol;Acc:2323829]
ENSRNOG00000068138	1075.89	-0.152125	0.102062	-1.49052	0.136088	0.261218	ENSRNOG00000068138	Aldh3b2	aldehyde dehydrogenase 3 family, member B2 [Source:RGD Symbol;Acc:1584166]
ENSRNOG00000070848	291.032	-0.229811	0.125699	-1.82827	0.0675093	0.153375	ENSRNOG00000070848	Zfp27	zinc finger protein 27 [Source:RGD Symbol;Acc:2318958]
ENSRNOG00000013160	1190.24	-0.00119902	0.131069	-0.00914804	0.992701	0.996498	ENSRNOG00000013160	Sash1	SAM and SH3 domain containing 1 [Source:RGD Symbol;Acc:1566017]
ENSRNOG00000024077	29.4996	0.50362	0.425178	1.18449	0.236218	0.390605	ENSRNOG00000024077	Fbxo5	F-box protein 5 [Source:RGD Symbol;Acc:1309405]
ENSRNOG00000069496	67.5276	0.219286	0.275271	0.79662	0.425672	0.587703	ENSRNOG00000069496
ENSRNOG00000020456	426.472	-0.38246	0.12969	-2.94904	0.0031876	0.0135126	ENSRNOG00000020456	Nucb2	nucleobindin 2 [Source:RGD Symbol;Acc:620888]
ENSRNOG00000019802	317.759	-0.184225	0.140357	-1.31254	0.189337	0.333536	ENSRNOG00000019802	Zfp428	zinc finger protein 428 [Source:RGD Symbol;Acc:1564862]
ENSRNOG00000065781	101.569	0.132634	1.01814	0.130271	0.896352	0.9391	ENSRNOG00000065781
ENSRNOG00000062668	22.4655	-0.0434081	0.414145	-0.104814	0.916524	0.950677	ENSRNOG00000062668
ENSRNOG00000012806	1206.66	0.105085	0.0736791	1.42625	0.153796	0.285973	ENSRNOG00000012806	Rbbp6	RB binding protein 6, ubiquitin ligase [Source:RGD Symbol;Acc:1311964]
ENSRNOG00000019497	1594.8	-0.135801	0.063143	-2.1507	0.0315001	0.0850711	ENSRNOG00000019497	Mrpl17	mitochondrial ribosomal protein L17 [Source:RGD Symbol;Acc:70943]
ENSRNOG00000045545	42.9784	-0.333306	0.292408	-1.13987	0.254342	0.410416	ENSRNOG00000045545	Eid2b	EP300 interacting inhibitor of differentiation 2B [Source:RGD Symbol;Acc:9381183]
ENSRNOG00000064214	1311.61	0.625051	0.0743532	8.40652	4.22353e-17	4.70251e-15	ENSRNOG00000064214
ENSRNOG00000037331	178.915	-0.0531271	0.208355	-0.254983	0.798736	0.876547	ENSRNOG00000037331	Cd33	CD33 molecule [Source:RGD Symbol;Acc:1596020]
ENSRNOG00000062784	38.7722	0.413177	0.355636	1.1618	0.245318	0.400737	ENSRNOG00000062784
ENSRNOG00000020774	299.482	0.547324	0.147167	3.71907	0.000199955	0.00133276	ENSRNOG00000020774	Zfp420	zinc finger protein 383-like [Source:RGD Symbol;Acc:9160828]
ENSRNOG00000037897	4660.64	-0.344689	0.074844	-4.60543	4.11623e-06	4.48121e-05	ENSRNOG00000037897	Rps19	ribosomal protein S19 [Source:RGD Symbol;Acc:68440]
ENSRNOG00000016831	775.965	-0.596169	0.107886	-5.52593	3.27745e-08	6.15967e-07	ENSRNOG00000016831	Serpinh1	serpin family H member 1 [Source:RGD Symbol;Acc:69302]
ENSRNOG00000024280	23.4435	0.0495777	0.43562	0.11381	0.909389	0.946735	ENSRNOG00000024280	Ccdc170	coiled-coil domain containing 170 [Source:RGD Symbol;Acc:1310945]
ENSRNOG00000055683	32.1706	-0.35671	0.333342	-1.0701	0.284573	0.443188	ENSRNOG00000055683	Cct7-ps1	chaperonin containing Tcp1, subunit 7 (eta), pseudogene 1 [Source:RGD Symbol;Acc:1562884]
ENSRNOG00000056228	362.813	-0.374482	0.110942	-3.37547	0.00073691	0.00396669	ENSRNOG00000056228	Atp10a	ATPase phospholipid transporting 10A (putative) [Source:RGD Symbol;Acc:1306150]
ENSRNOG00000028743	976.784	-0.372469	0.0776592	-4.7962	1.61702e-06	1.98707e-05	ENSRNOG00000028743	Gal3st3	galactose-3-O-sulfotransferase 3 [Source:RGD Symbol;Acc:1564991]
ENSRNOG00000067556	25.1236	0.63469	0.380559	1.66778	0.0953591	0.200557	ENSRNOG00000067556
ENSRNOG00000028273	869.271	-0.144389	0.0952608	-1.51572	0.129591	0.252398	ENSRNOG00000028273	Tmem150b	transmembrane protein 150B [Source:RGD Symbol;Acc:1306181]
ENSRNOG00000023233	219.89	-0.129242	0.127426	-1.01425	0.310463	0.472393	ENSRNOG00000023233	Zfp658	zinc finger protein 658 [Source:RGD Symbol;Acc:7541917]
ENSRNOG00000034075	3636.25	-0.0235609	0.0826086	-0.285211	0.775482	0.861862	ENSRNOG00000034075	Ube2ql1	ubiquitin-conjugating enzyme E2Q family-like 1 [Source:RGD Symbol;Acc:1598121]
ENSRNOG00000014341	1612.35	0.0398328	0.0932616	0.427108	0.6693	0.787314	ENSRNOG00000014341	Btbd10	BTB domain containing 10 [Source:RGD Symbol;Acc:1306301]
ENSRNOG00000069950	86.7104	-0.00289525	0.753884	-0.00384044	0.996936	0.998907	ENSRNOG00000069950
ENSRNOG00000020543	554.068	-0.337996	0.105834	-3.19364	0.00140493	0.00683554	ENSRNOG00000020543	Nosip	nitric oxide synthase interacting protein [Source:RGD Symbol;Acc:1309992]
ENSRNOG00000020298	145.561	-0.507187	0.198516	-2.55489	0.0106222	0.0357895	ENSRNOG00000020298	Bag3	BAG cochaperone 3 [Source:RGD Symbol;Acc:1307794]
ENSRNOG00000018255	3695.77	-0.268815	0.054147	-4.96455	6.88619e-07	9.28498e-06	ENSRNOG00000018255	Clptm1	CLPTM1 regulator of GABA type A receptor forward trafficking [Source:RGD Symbol;Acc:1310959]
ENSRNOG00000066399	518.734	-0.509455	0.102593	-4.96577	6.84273e-07	9.25185e-06	ENSRNOG00000066399
ENSRNOG00000021000	127.934	-0.0899306	0.161678	-0.556232	0.578052	0.716886	ENSRNOG00000021000	Naaladl1	N-acetylated alpha-linked acidic dipeptidase-like 1 [Source:RGD Symbol;Acc:620987]
ENSRNOG00000062327	553.841	-0.0949064	0.101051	-0.939191	0.347633	0.510711	ENSRNOG00000062327
ENSRNOG00000070318	41.1454	0.0906921	0.333086	0.272278	0.785408	0.868493	ENSRNOG00000070318
ENSRNOG00000033729	293.939	0.280611	0.122738	2.28625	0.0222394	0.0644279	ENSRNOG00000033729	LOC102556967	zinc finger protein 484-like [Source:RGD Symbol;Acc:7510716]
ENSRNOG00000020716	1359.27	-0.367785	0.0870266	-4.22612	2.37757e-05	0.000209617	ENSRNOG00000020716	Axl	Axl receptor tyrosine kinase [Source:RGD Symbol;Acc:620028]
ENSRNOG00000011488	596.558	-0.0792845	0.0872687	-0.90851	0.363609	0.526537	ENSRNOG00000011488	Sergef	secretion regulating guanine nucleotide exchange factor [Source:RGD Symbol;Acc:1563497]
ENSRNOG00000015441	199.21	0.0258565	0.187537	0.137874	0.89034	0.935	ENSRNOG00000015441	Il4r	interleukin 4 receptor [Source:RGD Symbol;Acc:2899]
ENSRNOG00000047057	351.269	0.377424	0.129275	2.91954	0.00350546	0.0145618	ENSRNOG00000047057	Gpr26	G protein-coupled receptor 26 [Source:RGD Symbol;Acc:619843]
ENSRNOG00000020412	3786.75	-0.298095	0.0483883	-6.16048	7.2523e-10	1.96655e-08	ENSRNOG00000020412	Sf3b2	splicing factor 3b, subunit 2 [Source:RGD Symbol;Acc:1307159]
ENSRNOG00000065957	29.2479	0.141417	0.407787	0.346791	0.728748	0.829814	ENSRNOG00000065957
ENSRNOG00000016923	2045.49	-0.0524488	0.0623693	-0.840938	0.400382	0.562779	ENSRNOG00000016923	Clptm1l	CLPTM1-like [Source:RGD Symbol;Acc:1307896]
ENSRNOG00000010938	703.789	-0.258608	0.0972793	-2.65841	0.00785111	0.0280886	ENSRNOG00000010938	Slc7a10	solute carrier family 7 member 10 [Source:RGD Symbol;Acc:621672]
ENSRNOG00000065260	403.736	0.31787	0.107973	2.94397	0.00324033	0.0136769	ENSRNOG00000065260
ENSRNOG00000011029	517.665	-0.327505	0.0973795	-3.36318	0.000770489	0.00411628	ENSRNOG00000011029	Sec11a	SEC11 homolog A, signal peptidase complex subunit [Source:RGD Symbol;Acc:69360]
ENSRNOG00000015239	330.922	-0.0700762	0.143042	-0.489899	0.624205	0.753546	ENSRNOG00000015239	Ginm1	glycosylated integral membrane protein 1 [Source:RGD Symbol;Acc:1309759]
ENSRNOG00000069539	227.867	-0.223013	0.13589	-1.64113	0.10077	0.209153	ENSRNOG00000069539	Zfp74	zinc finger protein 74 [Source:RGD Symbol;Acc:1563223]
ENSRNOG00000018426	152.468	-0.468456	0.185672	-2.52303	0.0116347	0.038582	ENSRNOG00000018426	Apoc1	apolipoprotein C1 [Source:RGD Symbol;Acc:2134]
ENSRNOG00000020110	1472.32	-0.172277	0.068927	-2.49941	0.0124399	0.0405927	ENSRNOG00000020110	B4gat1	beta-1,4-glucuronyltransferase 1 [Source:RGD Symbol;Acc:1309541]
ENSRNOG00000012084	1295.85	-0.20889	0.0694404	-3.00819	0.00262805	0.0114461	ENSRNOG00000012084	Xpnpep1	X-prolyl aminopeptidase 1 [Source:RGD Symbol;Acc:621274]
ENSRNOG00000046652	142.285	0.466073	0.168353	2.76843	0.00563276	0.0214635	ENSRNOG00000046652	Zfp790	zinc finger protein 30 homolog [Source:RGD Symbol;Acc:11363847]
ENSRNOG00000013770	740.979	0.0305699	0.105351	0.290173	0.771684	0.85933	ENSRNOG00000013770	Folh1	folate hydrolase 1 [Source:RGD Symbol;Acc:70963]
ENSRNOG00000024961	537.915	0.0856097	0.0926369	0.924142	0.355412	0.51805	ENSRNOG00000024961	Usp35	ubiquitin specific peptidase 35 [Source:RGD Symbol;Acc:1565984]
ENSRNOG00000017673	15140.6	-0.312562	0.0512279	-6.1014	1.05146e-09	2.78437e-08	ENSRNOG00000017673	Brsk1	BR serine/threonine kinase 1 [Source:RGD Symbol;Acc:1563268]
ENSRNOG00000032150	5729.44	-0.227124	0.0423333	-5.36513	8.08896e-08	1.40028e-06	ENSRNOG00000032150	Adcy2	adenylate cyclase 2 [Source:RGD Symbol;Acc:619965]
ENSRNOG00000018356	1890.07	-0.182744	0.074258	-2.46093	0.0138577	0.0441986	ENSRNOG00000018356	Trim3	tripartite motif-containing 3 [Source:RGD Symbol;Acc:70074]
ENSRNOG00000023753	1809.24	0.226581	0.0648165	3.49573	0.000472768	0.00274185	ENSRNOG00000023753	Afdn	afadin, adherens junction formation factor [Source:RGD Symbol;Acc:708561]
ENSRNOG00000030932	472.479	0.120882	0.0939034	1.28731	0.197988	0.344562	ENSRNOG00000030932	Zfp14	ZFP14 zinc finger protein [Source:RGD Symbol;Acc:1560188]
ENSRNOG00000018761	3656.22	-0.344935	0.0907046	-3.80283	0.000143051	0.000990774	ENSRNOG00000018761	Eif3c	eukaryotic translation initiation factor 3, subunit C [Source:RGD Symbol;Acc:1308871]
ENSRNOG00000062876	20.9096	0.0381071	0.424096	0.089855	0.928402	0.958082	ENSRNOG00000062876	LOC108349685	uncharacterized LOC108349685 [Source:RGD Symbol;Acc:11462351]
ENSRNOG00000030160	23.4402	0.327734	0.410266	0.798832	0.424388	0.586371	ENSRNOG00000030160	Zfp819	zinc finger protein 819 [Source:RGD Symbol;Acc:1309564]
ENSRNOG00000069633	133.146	-0.0832675	0.166557	-0.499933	0.617122	0.748272	ENSRNOG00000069633	Itpripl2	ITPRIP like 2 [Source:RGD Symbol;Acc:1564255]
ENSRNOG00000032946	154.571	0.688242	0.190368	3.61533	0.00029996	0.00187198	ENSRNOG00000032946	Pdzd7	PDZ domain containing 7 [Source:RGD Symbol;Acc:1309882]
ENSRNOG00000020743	54.1987	-0.412753	0.284707	-1.44975	0.147129	0.277047	ENSRNOG00000020743	Cyp2s1	cytochrome P450, family 2, subfamily s, polypeptide 1 [Source:RGD Symbol;Acc:1306078]
ENSRNOG00000012362	3302.82	-0.199776	0.0701372	-2.84836	0.00439457	0.0175175	ENSRNOG00000012362	Cacng3	calcium voltage-gated channel auxiliary subunit gamma 3 [Source:RGD Symbol;Acc:628803]
ENSRNOG00000014303	5014.5	0.00519256	0.0580744	0.0894123	0.928754	0.958224	ENSRNOG00000014303	Lrp11	LDL receptor related protein 11 [Source:RGD Symbol;Acc:1308602]
ENSRNOG00000018454	40718.3	-0.701911	0.0846454	-8.29237	1.11016e-16	1.15717e-14	ENSRNOG00000018454	Apoe	apolipoprotein E [Source:RGD Symbol;Acc:2138]
ENSRNOG00000052023	21.5988	0.0710238	0.419446	0.169327	0.865539	0.918471	ENSRNOG00000052023	LOC102547241	zinc finger protein 82 [Source:RGD Symbol;Acc:6499485]
ENSRNOG00000020531	472.846	-0.115365	0.107874	-1.06945	0.284868	0.443601	ENSRNOG00000020531	Fen1	flap structure-specific endonuclease 1 [Source:RGD Symbol;Acc:621821]
ENSRNOG00000019544	190.617	-0.0440223	0.170286	-0.258521	0.796005	0.875079	ENSRNOG00000019544	Zbtb2	zinc finger and BTB domain containing 2 [Source:RGD Symbol;Acc:1306621]
ENSRNOG00000020477	44.9718	0.280299	0.292909	0.956948	0.338593	0.501442	ENSRNOG00000020477	LOC100911093	CCA tRNA nucleotidyltransferase 1, mitochondrial-like [Source:RGD Symbol;Acc:6494996]
ENSRNOG00000023549	167.552	0.479464	0.167016	2.87076	0.00409482	0.0165607	ENSRNOG00000023549	Samd5	sterile alpha motif domain containing 5 [Source:RGD Symbol;Acc:1311012]
ENSRNOG00000021096	454.543	-0.166605	0.10459	-1.59293	0.111176	0.22531	ENSRNOG00000021096	Tmem143	transmembrane protein 143 [Source:RGD Symbol;Acc:1305013]
ENSRNOG00000022796	229.149	0.0121343	0.138653	0.0875158	0.930262	0.959106	ENSRNOG00000022796	Fgfbp3	fibroblast growth factor binding protein 3 [Source:RGD Symbol;Acc:1560326]
ENSRNOG00000029784	11076.7	-0.166633	0.0588206	-2.83291	0.00461263	0.0182236	ENSRNOG00000029784	Pak1	p21 (RAC1) activated kinase 1 [Source:RGD Symbol;Acc:3250]
ENSRNOG00000018885	790.919	0.466934	0.0887474	5.26139	1.42974e-07	2.32602e-06	ENSRNOG00000018885	Zfp780b	zinc finger protein 780B [Source:RGD Symbol;Acc:1592570]
ENSRNOG00000063852	864.977	0.0259935	0.091027	0.285558	0.775217	0.861787	ENSRNOG00000063852	Tmem80	transmembrane protein 80 [Source:RGD Symbol;Acc:1308399]
ENSRNOG00000048138	130.304	0.0430124	0.177021	0.242979	0.808021	0.882411	ENSRNOG00000048138	Zfp566	zinc finger protein 566 [Source:RGD Symbol;Acc:1563239]
ENSRNOG00000019306	831.266	-0.174568	0.126412	-1.38094	0.167297	0.304982	ENSRNOG00000019306	Syt12	synaptotagmin 12 [Source:RGD Symbol;Acc:621876]
ENSRNOG00000018440	1751.15	-0.0563563	0.0583054	-0.966571	0.333759	0.496784	ENSRNOG00000018440	Arfip2	ADP-ribosylation factor interacting protein 2 [Source:RGD Symbol;Acc:1303204]
ENSRNOG00000029082	324.047	-0.35513	0.129036	-2.75218	0.00592007	0.022343	ENSRNOG00000029082	RGD1566189	similar to ferritin light chain [Source:RGD Symbol;Acc:1566189]
ENSRNOG00000021104	48.6037	-0.841306	0.321127	-2.61985	0.0087968	0.0307167	ENSRNOG00000021104	Emp3	epithelial membrane protein 3 [Source:RGD Symbol;Acc:621094]
ENSRNOG00000011451	1351.79	-0.196771	0.0836289	-2.35291	0.0186272	0.0560533	ENSRNOG00000011451	Lrp3	LDL receptor related protein 3 [Source:RGD Symbol;Acc:619729]
ENSRNOG00000017254	1150.94	-0.046103	0.07127	-0.646878	0.517711	0.666737	ENSRNOG00000017254	Nsun2	NOP2/Sun RNA methyltransferase 2 [Source:RGD Symbol;Acc:1311954]
ENSRNOG00000020117	1034.37	-0.124561	0.0752933	-1.65435	0.0980563	0.20491	ENSRNOG00000020117	Brms1	BRMS1, transcriptional repressor and anoikis regulator [Source:RGD Symbol;Acc:1311057]
ENSRNOG00000050995	171.309	0.29928	0.153939	1.94414	0.051878	0.12493	ENSRNOG00000050995	Zfp780b	zinc finger protein 780B [Source:RGD Symbol;Acc:1592570]
ENSRNOG00000015503	1008.29	-0.140636	0.0838645	-1.67694	0.093554	0.197865	ENSRNOG00000015503	Otud7a	OTU deubiquitinase 7A [Source:RGD Symbol;Acc:1563721]
ENSRNOG00000021003	172.81	-0.118395	0.147912	-0.800447	0.423452	0.585463	ENSRNOG00000021003	Sac3d1	SAC3 domain containing 1 [Source:RGD Symbol;Acc:1308049]
ENSRNOG00000020274	124.501	0.28432	0.174725	1.62724	0.103687	0.21343	ENSRNOG00000020274	Taf5	TATA-box binding protein associated factor 5 [Source:RGD Symbol;Acc:1311332]
ENSRNOG00000058039	347.072	-0.508044	0.148496	-3.42127	0.000623297	0.00344383	ENSRNOG00000058039	Acta2	actin alpha 2, smooth muscle [Source:RGD Symbol;Acc:621676]
ENSRNOG00000018556	1071.44	-0.0336612	0.0899997	-0.374015	0.708393	0.814971	ENSRNOG00000018556	Tomm40	translocase of outer mitochondrial membrane 40 [Source:RGD Symbol;Acc:1303022]
ENSRNOG00000065206	26.8167	-0.521488	0.402217	-1.29654	0.194791	0.340288	ENSRNOG00000065206
ENSRNOG00000028137	94.1482	0.726238	0.280477	2.5893	0.00961716	0.0330628	ENSRNOG00000028137	Mki67	marker of proliferation Ki-67 [Source:RGD Symbol;Acc:1305476]
ENSRNOG00000051102	89.8923	-0.344585	0.22657	-1.52088	0.128291	0.250563	ENSRNOG00000051102	AABR07004269.3
ENSRNOG00000020296	2562.22	-0.0195733	0.0779504	-0.2511	0.801737	0.878355	ENSRNOG00000020296	Atp5mk	ATP synthase membrane subunit K [Source:RGD Symbol;Acc:631426]
ENSRNOG00000022640	22.2967	-0.136385	0.405635	-0.336225	0.736701	0.835504	ENSRNOG00000022640	Siglec8	sialic acid binding Ig-like lectin 8 [Source:RGD Symbol;Acc:1563073]
ENSRNOG00000029805	250.331	0.479553	0.144183	3.326	0.00088102	0.00461124	ENSRNOG00000029805	Zfp780b	zinc finger protein 780B [Source:RGD Symbol;Acc:1592570]
ENSRNOG00000017601	426.646	-0.184138	0.108702	-1.69397	0.0902714	0.192501	ENSRNOG00000017601	Srd5a1	steroid 5 alpha-reductase 1 [Source:RGD Symbol;Acc:3757]
ENSRNOG00000016090	680.817	0.0856585	0.098253	0.871815	0.383309	0.546199	ENSRNOG00000016090	Mtmr10	myotubularin related protein 10 [Source:RGD Symbol;Acc:1305958]
ENSRNOG00000045560	27.1706	1.07826	0.415026	2.59806	0.00937527	0.0323903	ENSRNOG00000045560	Gvin1	GTPase, very large interferon inducible 1 [Source:RGD Symbol;Acc:1598220]
ENSRNOG00000020651	1249.42	-0.0476023	0.0738347	-0.644714	0.519112	0.668087	ENSRNOG00000020651	Cars1	cysteinyl-tRNA synthetase 1 [Source:RGD Symbol;Acc:1310747]
ENSRNOG00000065330	750.984	-0.0892574	0.106323	-0.839494	0.401192	0.563594	ENSRNOG00000065330	Mrgpre	MAS related GPR family member E [Source:RGD Symbol;Acc:738045]
ENSRNOG00000016679	213.97	0.389365	0.160827	2.42102	0.015477	0.0482839	ENSRNOG00000016679	Tmc7	transmembrane channel-like 7 [Source:RGD Symbol;Acc:1564267]
ENSRNOG00000018350	871.17	0.134745	0.0894159	1.50695	0.131824	0.255312	ENSRNOG00000018350	Shtn1	shootin 1 [Source:RGD Symbol;Acc:1311558]
ENSRNOG00000028992	95.0681	-0.136543	0.257063	-0.531168	0.595302	0.732103	ENSRNOG00000028992	Acan	aggrecan [Source:RGD Symbol;Acc:68358]
ENSRNOG00000019838	62.992	-0.813891	0.265946	-3.06037	0.00221067	0.00991464	ENSRNOG00000019838	Gmfg	glia maturation factor, gamma [Source:RGD Symbol;Acc:620506]
ENSRNOG00000019549	1076.19	0.128591	0.0888717	1.44693	0.147917	0.278032	ENSRNOG00000019549	Akap12	A-kinase anchoring protein 12 [Source:RGD Symbol;Acc:70988]
ENSRNOG00000011151	870.506	0.320324	0.1299	2.46593	0.0136656	0.0436712	ENSRNOG00000011151	Tenm4	teneurin transmembrane protein 4 [Source:RGD Symbol;Acc:1304658]
ENSRNOG00000022189	275.033	-0.259463	0.130623	-1.98634	0.0469951	0.115558	ENSRNOG00000022189	Htatip2	HIV-1 Tat interactive protein 2 [Source:RGD Symbol;Acc:1309941]
ENSRNOG00000020762	1532.82	-0.0851283	0.0722386	-1.17843	0.238624	0.393467	ENSRNOG00000020762	Zfp260	zinc finger protein 260 [Source:RGD Symbol;Acc:621205]
ENSRNOG00000023318	70.398	0.00594527	0.240394	0.0247313	0.980269	0.988877	ENSRNOG00000023318	Tigd3	tigger transposable element derived 3 [Source:RGD Symbol;Acc:1305393]
ENSRNOG00000066701	92.4289	-0.238363	0.218823	-1.0893	0.276022	0.434052	ENSRNOG00000066701	LOC691427	similar to 6.8 kDa mitochondrial proteolipid [Source:RGD Symbol;Acc:1583946]
ENSRNOG00000053075	1509.2	0.116011	0.081008	1.43209	0.152118	0.283752	ENSRNOG00000053075	B4galnt4	beta-1,4-N-acetyl-galactosaminyl transferase 4 [Source:RGD Symbol;Acc:1310052]
ENSRNOG00000012874	1390.38	-0.348028	0.0712203	-4.88663	1.02576e-06	1.33294e-05	ENSRNOG00000012874	Rgma	repulsive guidance molecule BMP co-receptor a [Source:RGD Symbol;Acc:1311983]
ENSRNOG00000065214	282.182	-0.0418417	0.18429	-0.227042	0.820391	0.890164	ENSRNOG00000065214	LOC120097335	high mobility group nucleosome-binding domain-containing protein 5-like [Source:RGD Symbol;Acc:41304028]
ENSRNOG00000011895	166.78	-0.177865	0.155734	-1.14211	0.25341	0.409361	ENSRNOG00000011895	Saal1	serum amyloid A-like 1 [Source:RGD Symbol;Acc:1587443]
ENSRNOG00000017659	780.449	-0.130745	0.140725	-0.929077	0.352849	0.515362	ENSRNOG00000017659	Hs3st2	heparan sulfate-glucosamine 3-sulfotransferase 2 [Source:RGD Symbol;Acc:727787]
ENSRNOG00000020777	554.331	-0.0192685	0.101088	-0.190611	0.84883	0.907886	ENSRNOG00000020777	Zfp382	zinc finger protein 382 [Source:RGD Symbol;Acc:708385]
ENSRNOG00000016266	320.59	-0.166612	0.126886	-1.31309	0.189153	0.333412	ENSRNOG00000016266	Mphosph10	M-phase phosphoprotein 10 [Source:RGD Symbol;Acc:1307633]
ENSRNOG00000017839	440.568	-0.288521	0.10126	-2.84932	0.00438131	0.0174775	ENSRNOG00000017839	Ercc1	ERCC excision repair 1, endonuclease non-catalytic subunit [Source:RGD Symbol;Acc:1306992]
ENSRNOG00000017918	361.686	0.000978988	0.127002	0.00770845	0.99385	0.997332	ENSRNOG00000017918	Iglon5	IgLON family member 5 [Source:RGD Symbol;Acc:1305344]
ENSRNOG00000016381	71.2769	-0.208665	0.247296	-0.843787	0.398788	0.561564	ENSRNOG00000016381	Ust	uronyl-2-sulfotransferase [Source:RGD Symbol;Acc:1304743]
ENSRNOG00000020736	177.93	-0.0480147	0.148328	-0.323707	0.74616	0.842653	ENSRNOG00000020736	Nadsyn1	NAD synthetase 1 [Source:RGD Symbol;Acc:727801]
ENSRNOG00000023985	216.613	0.259769	0.136972	1.89651	0.0578929	0.136071	ENSRNOG00000023985	Fan1	FANCD2 and FANCI associated nuclease 1 [Source:RGD Symbol;Acc:1566323]
ENSRNOG00000019376	379.464	0.578306	0.121403	4.76351	1.90257e-06	2.29197e-05	ENSRNOG00000019376	Zfp329	zinc finger protein 329 [Source:RGD Symbol;Acc:1565029]
ENSRNOG00000017456	476.242	0.173492	0.140912	1.23121	0.218243	0.368783	ENSRNOG00000017456	Vstm2b	V-set and transmembrane domain containing 2B [Source:RGD Symbol;Acc:1306235]
ENSRNOG00000008815	297.536	-0.142176	0.118608	-1.1987	0.230643	0.383935	ENSRNOG00000008815	Fbxo46	F-box protein 46 [Source:RGD Symbol;Acc:1308393]
ENSRNOG00000016722	2232.79	-0.050774	0.0671832	-0.755755	0.449796	0.60743	ENSRNOG00000016722	Xpo6	exportin 6 [Source:RGD Symbol;Acc:1311491]
ENSRNOG00000048397	1019.22	-0.146571	0.0672326	-2.18005	0.0292534	0.0801076	ENSRNOG00000048397	Sephs2	selenophosphate synthetase 2 [Source:RGD Symbol;Acc:1308827]
ENSRNOG00000017728	536.109	0.110819	0.133838	0.828012	0.407664	0.569744	ENSRNOG00000017728	Edrf1	erythroid differentiation regulatory factor 1 [Source:RGD Symbol;Acc:1306820]
ENSRNOG00000067450	950.807	-0.0598583	0.0756183	-0.791585	0.428602	0.590252	ENSRNOG00000067450	Zfp146	zinc finger protein 146 [Source:RGD Symbol;Acc:7630088]
ENSRNOG00000015552	830.376	0.0234333	0.0796264	0.294291	0.768536	0.857496	ENSRNOG00000015552	Ppil4	peptidylprolyl isomerase like 4 [Source:RGD Symbol;Acc:1311051]
ENSRNOG00000016919	1574.03	-0.202479	0.0669541	-3.02415	0.00249332	0.0109582	ENSRNOG00000016919	Scaf8	SR-related CTD-associated factor 8 [Source:RGD Symbol;Acc:708362]
ENSRNOG00000019106	4078.4	-0.412151	0.0766285	-5.37856	7.5085e-08	1.30904e-06	ENSRNOG00000019106	Rps17	40S ribosomal protein S17-like [Source:RGD Symbol;Acc:2318277]
ENSRNOG00000010959	215.258	-0.06952	0.142167	-0.489002	0.62484	0.754089	ENSRNOG00000010959	Klhl25	kelch-like family member 25 [Source:RGD Symbol;Acc:1310815]
ENSRNOG00000021474	62.7789	-0.318989	0.299839	-1.06387	0.287387	0.446342	ENSRNOG00000021474	Siglec5	sialic acid binding Ig-like lectin 5 [Source:RGD Symbol;Acc:1305432]
ENSRNOG00000028274	1230.7	-0.201635	0.0961128	-2.0979	0.0359142	0.0942219	ENSRNOG00000028274	Myrf	myelin regulatory factor [Source:RGD Symbol;Acc:1306622]
ENSRNOG00000024410	622.952	-0.194603	0.0886308	-2.19566	0.0281161	0.077688	ENSRNOG00000024410	Blvrb	biliverdin reductase B [Source:RGD Symbol;Acc:1306080]
ENSRNOG00000010017	674.687	0.391295	0.0956803	4.08961	4.32095e-05	0.000354578	ENSRNOG00000010017	Wee1	WEE1 G2 checkpoint kinase [Source:RGD Symbol;Acc:1307895]
ENSRNOG00000050015	47.3838	-0.0430927	0.335514	-0.128438	0.897802	0.939949	ENSRNOG00000050015	Cox7a1	cytochrome c oxidase subunit 7A1 [Source:RGD Symbol;Acc:6496527]
ENSRNOG00000047692	36.0645	0.381623	0.415222	0.919081	0.358053	0.520454	ENSRNOG00000047692	Hells	helicase, lymphoid specific [Source:RGD Symbol;Acc:1309820]
ENSRNOG00000065271	50.7131	-0.00381642	0.296535	-0.01287	0.989731	0.994561	ENSRNOG00000065271	Fam174b	family with sequence similarity 174, member B [Source:RGD Symbol;Acc:1596692]
ENSRNOG00000020304	877.232	0.0851188	0.0825318	1.03135	0.302379	0.463309	ENSRNOG00000020304	Pdcd11	programmed cell death 11 [Source:RGD Symbol;Acc:1304933]
ENSRNOG00000017418	6058.43	-0.193895	0.070429	-2.75305	0.00590426	0.0223129	ENSRNOG00000017418	Rps3	ribosomal protein S3 [Source:RGD Symbol;Acc:619888]
ENSRNOG00000012369	141.219	0.14027	0.182069	0.770421	0.44105	0.60103	ENSRNOG00000012369	Fam174b	family with sequence similarity 174, member B [Source:RGD Symbol;Acc:1596692]
ENSRNOG00000014450	753.698	0.275319	0.0813344	3.38502	0.000711728	0.00385703	ENSRNOG00000014450	Shprh	SNF2 histone linker PHD RING helicase [Source:RGD Symbol;Acc:1310342]
ENSRNOG00000067065	2603.82	-0.195123	0.0682555	-2.85872	0.00425356	0.0170797	ENSRNOG00000067065	Capns1	calpain, small subunit 1 [Source:RGD Symbol;Acc:2270]
ENSRNOG00000037298	629.452	-0.0575738	0.130938	-0.439704	0.660151	0.780174	ENSRNOG00000037298	C1h19orf81	simlar to human chromosome 19 open reading frame 81 [Source:RGD Symbol;Acc:1309036]
ENSRNOG00000016825	145.564	-0.331596	0.16416	-2.01995	0.0433885	0.109042	ENSRNOG00000016825	Polr1g	RNA polymerase I subunit G [Source:RGD Symbol;Acc:1591707]
ENSRNOG00000024737	1222.83	0.363382	0.0869644	4.17851	2.93421e-05	0.000252187	ENSRNOG00000024737	Tnrc6a	trinucleotide repeat containing adaptor 6A [Source:RGD Symbol;Acc:1307268]
ENSRNOG00000013624	51.278	0.79346	0.316874	2.50402	0.0122791	0.0401927	ENSRNOG00000013624	Uevld	UEV and lactate/malate dehyrogenase domains [Source:RGD Symbol;Acc:1587416]
ENSRNOG00000070456	33.7357	0.596484	0.335464	1.77808	0.0753903	0.167424	ENSRNOG00000070456	LOC108348146	vomeronasal type-1 receptor 3-like [Source:RGD Symbol;Acc:11394442]
ENSRNOG00000020325	246.16	-0.32926	0.134648	-2.44535	0.0144713	0.0457782	ENSRNOG00000020325	Calhm2	calcium homeostasis modulator family member 2 [Source:RGD Symbol;Acc:1308276]
ENSRNOG00000015413	266.344	-0.0819037	0.139196	-0.588407	0.556259	0.698867	ENSRNOG00000015413	Qpctl	glutaminyl-peptide cyclotransferase-like [Source:RGD Symbol;Acc:1308128]
ENSRNOG00000016897	1057.48	-0.276587	0.110801	-2.49624	0.0125517	0.040836	ENSRNOG00000016897	Rlbp1	retinaldehyde binding protein 1 [Source:RGD Symbol;Acc:1309649]
ENSRNOG00000037690	40.9053	0.264907	0.335634	0.789275	0.429951	0.591334	ENSRNOG00000037690	Sertad3	SERTA domain containing 3 [Source:RGD Symbol;Acc:1564271]
ENSRNOG00000014330	6938.35	0.217922	0.0623214	3.49675	0.000470965	0.00273264	ENSRNOG00000014330	Pcmt1	protein-L-isoaspartate (D-aspartate) O-methyltransferase 1 [Source:RGD Symbol;Acc:3268]
ENSRNOG00000013223	447.299	0.0364139	0.128831	0.282648	0.777447	0.863066	ENSRNOG00000013223	Fah	fumarylacetoacetate hydrolase [Source:RGD Symbol;Acc:61932]
ENSRNOG00000046112	368.747	-0.126792	0.129897	-0.976099	0.329015	0.491965	ENSRNOG00000046112	Dedd2	death effector domain containing 2 [Source:RGD Symbol;Acc:1588968]
ENSRNOG00000027264	2753.09	-0.154762	0.0896166	-1.72693	0.0841803	0.182174	ENSRNOG00000027264	Dagla	diacylglycerol lipase, alpha [Source:RGD Symbol;Acc:1359461]
ENSRNOG00000032798	494.199	0.0599693	0.105415	0.568885	0.569434	0.709957	ENSRNOG00000032798	Slco3a1	solute carrier organic anion transporter family, member 3a1 [Source:RGD Symbol;Acc:620227]
ENSRNOG00000019319	925.541	0.167392	0.077802	2.15152	0.0314353	0.0849118	ENSRNOG00000019319	Fchsd2	FCH and double SH3 domains 2 [Source:RGD Symbol;Acc:1304812]
ENSRNOG00000018603	320.681	0.192885	0.142282	1.35565	0.17521	0.315114	ENSRNOG00000018603	Carns1	carnosine synthase 1 [Source:RGD Symbol;Acc:1308234]
ENSRNOG00000027422	343.105	0.21999	0.114115	1.92779	0.0538813	0.1287	ENSRNOG00000027422	Fastkd3	FAST kinase domains 3 [Source:RGD Symbol;Acc:1309729]
ENSRNOG00000020763	3611.31	0.485061	0.0939875	5.16091	2.45751e-07	3.7445e-06	ENSRNOG00000020763	Snrnp70	small nuclear ribonucleoprotein U1 subunit 70 [Source:RGD Symbol;Acc:1307120]
ENSRNOG00000049505	131.976	-0.0635862	0.176694	-0.359866	0.718947	0.822763	ENSRNOG00000049505	Nup43	nucleoporin 43 [Source:RGD Symbol;Acc:1596513]
ENSRNOG00000059408	894.963	-0.182542	0.10004	-1.8247	0.0680468	0.154405	ENSRNOG00000059408	Prr12	proline rich 12 [Source:RGD Symbol;Acc:1309896]
ENSRNOG00000048250	69.1315	-0.156387	0.271846	-0.575276	0.565105	0.706537	ENSRNOG00000048250	Ldaf1	lipid droplet assembly factor 1 [Source:RGD Symbol;Acc:727895]
ENSRNOG00000028891	79.888	-0.191771	0.234738	-0.816958	0.413953	0.576069	ENSRNOG00000028891	Cyp2t1	cytochrome P450, family 2, subfamily t, polypeptide 1 [Source:RGD Symbol;Acc:620086]
ENSRNOG00000019959	3237.67	-0.0503743	0.0953254	-0.528446	0.59719	0.733425	ENSRNOG00000019959	Kcnc3	potassium voltage-gated channel subfamily C member 3 [Source:RGD Symbol;Acc:621358]
ENSRNOG00000020452	716.467	-0.155245	0.0847355	-1.83212	0.0669342	0.152422	ENSRNOG00000020452	Nsmce4a	NSE4 homolog A, SMC5-SMC6 complex component [Source:RGD Symbol;Acc:1309025]
ENSRNOG00000050224	653.019	0.0831994	0.104356	0.797264	0.425298	0.58739	ENSRNOG00000050224	Stambpl1	STAM binding protein-like 1 [Source:RGD Symbol;Acc:1583011]
ENSRNOG00000014916	715.456	0.622179	0.0854106	7.28456	3.22724e-13	1.84231e-11	ENSRNOG00000014916	Lats1	large tumor suppressor kinase 1 [Source:RGD Symbol;Acc:1564085]
ENSRNOG00000020263	26440.7	-0.166836	0.0760025	-2.19514	0.0281533	0.0777762	ENSRNOG00000020263	Atp1a3	ATPase Na+/K+ transporting subunit alpha 3 [Source:RGD Symbol;Acc:2169]
ENSRNOG00000051197	244.698	0.188784	0.147176	1.28271	0.199595	0.346456	ENSRNOG00000051197	LOC120097345	60S ribosomal protein L7a [Source:RGD Symbol;Acc:41344265]
ENSRNOG00000020947	1836.41	-0.271989	0.0782224	-3.47712	0.000506822	0.00290627	ENSRNOG00000020947	Egln2	egl-9 family hypoxia-inducible factor 2 [Source:RGD Symbol;Acc:631376]
ENSRNOG00000020597	146.442	0.161401	0.165593	0.974686	0.329716	0.4926	ENSRNOG00000020597	C1h10orf88	similar to human chromosome 10 open reading frame 88 [Source:RGD Symbol;Acc:1305014]
ENSRNOG00000017826	506.161	-0.144104	0.101126	-1.425	0.154156	0.286438	ENSRNOG00000017826	Mtrr	5-methyltetrahydrofolate-homocysteine methyltransferase reductase [Source:RGD Symbol;Acc:1308671]
ENSRNOG00000013506	1016.25	0.621668	0.0693328	8.96644	3.06261e-19	4.59298e-17	ENSRNOG00000013506	Zfand6	zinc finger AN1-type containing 6 [Source:RGD Symbol;Acc:1359317]
ENSRNOG00000014277	387.411	0.0588317	0.111276	0.528702	0.597012	0.73333	ENSRNOG00000014277	Zdhhc13	zinc finger DHHC-type palmitoyltransferase 13 [Source:RGD Symbol;Acc:1309736]
ENSRNOG00000012641	1284.07	-0.211964	0.0827476	-2.56158	0.0104198	0.0352126	ENSRNOG00000012641	Sfr1	SWI5-dependent homologous recombination repair protein 1 [Source:RGD Symbol;Acc:1305481]
ENSRNOG00000015675	1407.66	-0.0623801	0.10446	-0.597168	0.550395	0.694122	ENSRNOG00000015675	Nell1	neural EGFL like 1 [Source:RGD Symbol;Acc:620998]
ENSRNOG00000050206	6051.69	-0.062164	0.0553243	-1.12363	0.26117	0.417855	ENSRNOG00000050206	Shank2	SH3 and multiple ankyrin repeat domains 2 [Source:RGD Symbol;Acc:628772]
ENSRNOG00000012002	550.067	-0.0943323	0.114406	-0.824542	0.409632	0.57168	ENSRNOG00000012002	Iqgap1	IQ motif containing GTPase activating protein 1 [Source:RGD Symbol;Acc:1311884]
ENSRNOG00000012788	1311.03	-0.0765353	0.0697454	-1.09735	0.272488	0.430063	ENSRNOG00000012788	Clns1a	chloride nucleotide-sensitive channel 1A [Source:RGD Symbol;Acc:61884]
ENSRNOG00000019418	3081.4	-0.305533	0.0959136	-3.1855	0.00144503	0.00697457	ENSRNOG00000019418	Lrrc4b	leucine rich repeat containing 4B [Source:RGD Symbol;Acc:1307121]
ENSRNOG00000042308	25.9532	0.142528	0.387785	0.367543	0.713214	0.818787	ENSRNOG00000042308	Zfp455l1	zinc finger protein 455 like 1 [Source:RGD Symbol;Acc:1594231]
ENSRNOG00000012574	659.045	-0.0206974	0.095299	-0.217184	0.828065	0.894332	ENSRNOG00000012574	Pum3	pumilio RNA-binding family member 3 [Source:RGD Symbol;Acc:1564753]
ENSRNOG00000047040	23.1185	-0.452501	0.420537	-1.07601	0.281925	0.440136	ENSRNOG00000047040	Lhb	luteinizing hormone subunit beta [Source:RGD Symbol;Acc:3006]
ENSRNOG00000001500	1098.41	-0.224568	0.0747886	-3.0027	0.00267593	0.0116081	ENSRNOG00000001500	Rab4b	RAB4B, member RAS oncogene family [Source:RGD Symbol;Acc:620931]
ENSRNOG00000016737	865.634	-0.0482318	0.110521	-0.436406	0.662542	0.782	ENSRNOG00000016737	Tcerg1l	transcription elongation regulator 1-like [Source:RGD Symbol;Acc:1562437]
ENSRNOG00000019413	130.19	0.194094	0.181676	1.06836	0.28536	0.444234	ENSRNOG00000019413	Atg16l2	autophagy related 16-like 2 [Source:RGD Symbol;Acc:1311400]
ENSRNOG00000068445	2715.46	-0.757557	0.078409	-9.66161	4.38926e-22	9.92445e-20	ENSRNOG00000068445	Rplp2	ribosomal protein lateral stalk subunit P2 [Source:RGD Symbol;Acc:621775]
ENSRNOG00000015844	606.839	-0.190019	0.0892275	-2.1296	0.0332049	0.0883759	ENSRNOG00000015844	Snrpd2	small nuclear ribonucleoprotein D2 polypeptide [Source:RGD Symbol;Acc:1593018]
ENSRNOG00000068953	465.792	0.022115	0.116658	0.189572	0.849644	0.908163	ENSRNOG00000068953
ENSRNOG00000017963	462.05	0.438773	0.0990221	4.43106	9.37729e-06	9.24333e-05	ENSRNOG00000017963	RGD1566325	similar to regulator of sex-limitation candidate 16 [Source:RGD Symbol;Acc:1566325]
ENSRNOG00000019532	1675.86	-0.102627	0.0751906	-1.3649	0.172286	0.311449	ENSRNOG00000019532	Emc10	ER membrane protein complex subunit 10 [Source:RGD Symbol;Acc:1303214]
ENSRNOG00000015217	469.816	-0.242119	0.111275	-2.17586	0.0295656	0.0807668	ENSRNOG00000015217	Ltv1	LTV1 ribosome biogenesis factor [Source:RGD Symbol;Acc:1311264]
ENSRNOG00000016267	763.042	-0.113746	0.0915925	-1.24187	0.214284	0.364591	ENSRNOG00000016267	Chst15	carbohydrate sulfotransferase 15 [Source:RGD Symbol;Acc:628881]
ENSRNOG00000020425	2163.61	-0.208849	0.0568561	-3.6733	0.000239442	0.00154685	ENSRNOG00000020425	Stim1	stromal interaction molecule 1 [Source:RGD Symbol;Acc:1306831]
ENSRNOG00000017383	464.016	0.109676	0.11797	0.929693	0.35253	0.515075	ENSRNOG00000017383	Hikeshi	heat shock protein nuclear import factor hikeshi [Source:RGD Symbol;Acc:1359455]
ENSRNOG00000019161	964.04	0.242605	0.0782683	3.09966	0.00193744	0.00888011	ENSRNOG00000019161	Cpeb1	cytoplasmic polyadenylation element binding protein 1 [Source:RGD Symbol;Acc:1310421]
ENSRNOG00000047526	410.562	-0.00432934	0.102504	-0.0422359	0.966311	0.981673	ENSRNOG00000047526	Zfp526	zinc finger protein 526 [Source:RGD Symbol;Acc:1588959]
ENSRNOG00000028041	40.2718	-0.00327806	0.357055	-0.00918083	0.992675	0.996498	ENSRNOG00000028041	Tnnt1	troponin T1, slow skeletal type [Source:RGD Symbol;Acc:621852]
ENSRNOG00000016462	254.604	0.0192451	0.129574	0.148526	0.881927	0.92942	ENSRNOG00000016462	LOC102547287	zinc finger protein 728-like [Source:RGD Symbol;Acc:7718701]
ENSRNOG00000010664	473.397	-0.155617	0.0964205	-1.61394	0.10654	0.21796	ENSRNOG00000010664	Wdr73	WD repeat domain 73 [Source:RGD Symbol;Acc:1306429]
ENSRNOG00000019424	72.3309	-0.0900629	0.23507	-0.383132	0.701622	0.810301	ENSRNOG00000019424	Aspdh	aspartate dehydrogenase domain containing [Source:RGD Symbol;Acc:1310111]
ENSRNOG00000016790	988.308	0.361354	0.0744384	4.8544	1.20753e-06	1.5286e-05	ENSRNOG00000016790	Kmt5b	lysine methyltransferase 5B [Source:RGD Symbol;Acc:1311637]
ENSRNOG00000039730	715.899	-0.138494	0.0870858	-1.59032	0.111763	0.226064	ENSRNOG00000039730	Orai3	ORAI calcium release-activated calcium modulator 3 [Source:RGD Symbol;Acc:1306538]
ENSRNOG00000020949	34.8389	-0.438874	0.336896	-1.3027	0.192678	0.337773	ENSRNOG00000020949	Hsd17b14	hydroxysteroid (17-beta) dehydrogenase 14 [Source:RGD Symbol;Acc:1588673]
ENSRNOG00000013358	362.503	0.0344177	0.113627	0.302902	0.761964	0.853125	ENSRNOG00000013358	Aqp11	aquaporin 11 [Source:RGD Symbol;Acc:628763]
ENSRNOG00000049259	260.38	0.512639	0.1483	3.45676	0.000546716	0.00309996	ENSRNOG00000049259	LOC102549842	zinc finger protein 91-like [Source:RGD Symbol;Acc:7600894]
ENSRNOG00000015860	79.5994	1.85281	0.27174	6.81831	9.21162e-12	3.94703e-10	ENSRNOG00000015860	Gipr	gastric inhibitory polypeptide receptor [Source:RGD Symbol;Acc:2689]
ENSRNOG00000018517	140.441	0.287322	0.176723	1.62583	0.103986	0.213896	ENSRNOG00000018517	Trim21	tripartite motif-containing 21 [Source:RGD Symbol;Acc:1305795]
ENSRNOG00000050554	37.144	-0.0466077	0.339641	-0.137226	0.890852	0.935372	ENSRNOG00000050554	C1h10orf143	similar to human chromosome 10 open reading frame 143 [Source:RGD Symbol;Acc:2318344]
ENSRNOG00000021206	1093.14	-0.355863	0.102828	-3.46077	0.000538637	0.00305887	ENSRNOG00000021206	Plaat3	phospholipase A and acyltransferase 3 [Source:RGD Symbol;Acc:2829]
ENSRNOG00000050223	1804.31	-0.136834	0.0784268	-1.74474	0.0810304	0.17706	ENSRNOG00000050223	Rin1	Ras and Rab interactor 1 [Source:RGD Symbol;Acc:620006]
ENSRNOG00000069921	307.195	0.237848	0.12495	1.90355	0.0569693	0.134502	ENSRNOG00000069921	Zfp748	zinc finger protein 748 [Source:RGD Symbol;Acc:1594173]
ENSRNOG00000016054	1296.46	0.0539932	0.0710308	0.760138	0.447172	0.605725	ENSRNOG00000016054	Tab2	TGF-beta activated kinase 1/MAP3K7 binding protein 2 [Source:RGD Symbol;Acc:1309527]
ENSRNOG00000020956	193.212	-0.168969	0.176948	-0.95491	0.339623	0.502465	ENSRNOG00000020956	Bcat2	branched chain amino acid transaminase 2 [Source:RGD Symbol;Acc:68948]
ENSRNOG00000001501	262.848	-0.328869	0.129519	-2.53916	0.011112	0.0371503	ENSRNOG00000001501	Snrpa	small nuclear ribonucleoprotein polypeptide A [Source:RGD Symbol;Acc:1307416]
ENSRNOG00000020417	3533.86	-0.167694	0.0504739	-3.32239	0.000892504	0.00466349	ENSRNOG00000020417	Gsk3a	glycogen synthase kinase 3 alpha [Source:RGD Symbol;Acc:620351]
ENSRNOG00000013877	110.069	-0.388585	0.226337	-1.71684	0.0860077	0.18534	ENSRNOG00000013877	Ttc23	tetratricopeptide repeat domain 23 [Source:RGD Symbol;Acc:1310409]
ENSRNOG00000064721	962.401	0.207823	0.103215	2.01349	0.0440627	0.110266	ENSRNOG00000064721	Rgmb	repulsive guidance molecule BMP co-receptor b [Source:RGD Symbol;Acc:1595392]
ENSRNOG00000018878	632.025	0.551066	0.109512	5.032	4.85396e-07	6.78124e-06	ENSRNOG00000018878	Ssh3	slingshot protein phosphatase 3 [Source:RGD Symbol;Acc:1308679]
ENSRNOG00000020410	38.73	0.274569	0.312099	0.879749	0.378995	0.54226	ENSRNOG00000020410	Th	tyrosine hydroxylase [Source:RGD Symbol;Acc:3853]
ENSRNOG00000014852	282.68	0.865843	0.131492	6.58476	4.55625e-11	1.64126e-09	ENSRNOG00000014852	Fbxo30	F-box protein 30 [Source:RGD Symbol;Acc:1359367]
ENSRNOG00000037715	441.324	0.0285653	0.101703	0.280869	0.778811	0.863928	ENSRNOG00000037715	Actmap	actin maturation protease [Source:RGD Symbol;Acc:1560854]
ENSRNOG00000020793	536.197	-0.151061	0.0999785	-1.51093	0.130806	0.25399	ENSRNOG00000020793	Ruvbl2	RuvB-like AAA ATPase 2 [Source:RGD Symbol;Acc:1306509]
ENSRNOG00000047145	272.94	0.444933	0.130977	3.39703	0.000681223	0.00371776	ENSRNOG00000047145	LOC102551340	zinc finger protein 728-like [Source:RGD Symbol;Acc:7697243]
ENSRNOG00000019442	365.669	-0.197721	0.125861	-1.57094	0.116196	0.23301	ENSRNOG00000019442	Josd2	Josephin domain containing 2 [Source:RGD Symbol;Acc:1307305]
ENSRNOG00000016935	1057.55	0.330376	0.0831996	3.97088	7.1608e-05	0.000544435	ENSRNOG00000016935	Mapk1ip1	mitogen-activated protein kinase 1 interacting protein 1 [Source:RGD Symbol;Acc:1565431]
ENSRNOG00000018531	497.901	-0.133134	0.0982072	-1.35564	0.175213	0.315114	ENSRNOG00000018531	Mrps11	mitochondrial ribosomal protein S11 [Source:RGD Symbol;Acc:1559901]
ENSRNOG00000020426	642.291	-0.253857	0.118612	-2.14024	0.0323356	0.0866981	ENSRNOG00000020426	Erf	Ets2 repressor factor [Source:RGD Symbol;Acc:1311991]
ENSRNOG00000016038	48.3217	-0.0639798	0.275084	-0.232582	0.816086	0.887683	ENSRNOG00000016038	Mgmt	O-6-methylguanine-DNA methyltransferase [Source:RGD Symbol;Acc:3087]
ENSRNOG00000016611	2589.84	-0.209519	0.0646758	-3.23952	0.0011973	0.00598521	ENSRNOG00000016611	Hras	HRas proto-oncogene, GTPase [Source:RGD Symbol;Acc:2827]
ENSRNOG00000056118	4305.63	-0.343629	0.0575748	-5.96839	2.39603e-09	5.8302e-08	ENSRNOG00000056118	Cic	capicua transcriptional repressor [Source:RGD Symbol;Acc:1310706]
ENSRNOG00000019127	226.771	1.1033	0.15349	7.1881	6.57013e-13	3.48597e-11	ENSRNOG00000019127	Zfp606	zinc finger protein 606 [Source:RGD Symbol;Acc:1309810]
ENSRNOG00000046353	120.043	0.301188	0.2015	1.49473	0.134985	0.259976	ENSRNOG00000046353	Zfp273l-ps1	zinc finger protein 273 like, pseudogene 1 [Source:RGD Symbol;Acc:1587241]
ENSRNOG00000023150	13181.2	-0.208197	0.0496106	-4.19662	2.70931e-05	0.000235753	ENSRNOG00000023150	Gpi	glucose-6-phosphate isomerase [Source:RGD Symbol;Acc:2727]
ENSRNOG00000047229	406.605	0.029343	0.110483	0.265587	0.790557	0.871695	ENSRNOG00000047229	Trim68	tripartite motif containing 68 [Source:RGD Symbol;Acc:1593867]
ENSRNOG00000062741	64.0782	0.757455	0.241337	3.13858	0.00169768	0.00795117	ENSRNOG00000062741	Ldhal6b	lactate dehydrogenase A-like 6B [Source:RGD Symbol;Acc:727955]
ENSRNOG00000020587	300.539	-0.0570946	0.12468	-0.457929	0.647003	0.770334	ENSRNOG00000020587	Efemp2	EGF containing fibulin extracellular matrix protein 2 [Source:RGD Symbol;Acc:1359496]
ENSRNOG00000027240	2735.13	0.0972067	0.0785031	1.23825	0.215622	0.365766	ENSRNOG00000027240	Kndc1	kinase non-catalytic C-lobe domain containing 1 [Source:RGD Symbol;Acc:1565261]
ENSRNOG00000020411	1286.67	0.0410509	0.0664084	0.618158	0.536471	0.68353	ENSRNOG00000020411	Sec23ip	SEC23 interacting protein [Source:RGD Symbol;Acc:1309328]
ENSRNOG00000063592	66.0687	-0.181757	0.288734	-0.629499	0.529022	0.676468	ENSRNOG00000063592	Lyve1	lymphatic vessel endothelial hyaluronan receptor 1 [Source:RGD Symbol;Acc:1310864]
ENSRNOG00000016973	134.638	-0.0886702	0.167563	-0.529177	0.596683	0.733169	ENSRNOG00000016973	Tmem242	transmembrane protein 242 [Source:RGD Symbol;Acc:1307262]
ENSRNOG00000049232	159.694	-0.0981063	0.172646	-0.568253	0.569863	0.710314	ENSRNOG00000049232	Tcf7l2	transcription factor 7 like 2 [Source:RGD Symbol;Acc:1583621]
ENSRNOG00000019318	928.95	0.0233793	0.106075	0.220404	0.825556	0.892642	ENSRNOG00000019318	Syt3	synaptotagmin 3 [Source:RGD Symbol;Acc:3805]
ENSRNOG00000018547	479.938	-0.213934	0.108212	-1.97699	0.0480426	0.117602	ENSRNOG00000018547	Mrpl46	mitochondrial ribosomal protein L46 [Source:RGD Symbol;Acc:1309123]
ENSRNOG00000042592	1290.5	-0.48871	0.0988729	-4.94282	7.70025e-07	1.02789e-05	ENSRNOG00000042592	Rgs10	regulator of G-protein signaling 10 [Source:RGD Symbol;Acc:3562]
ENSRNOG00000064244	29.1315	0.24621	0.390688	0.630197	0.528565	0.676095	ENSRNOG00000064244	LOC102552823	zinc finger protein 709-like [Source:RGD Symbol;Acc:7716102]
ENSRNOG00000020481	119.04	-0.129829	0.178208	-0.728527	0.466291	0.622103	ENSRNOG00000020481	Pafah1b3	platelet-activating factor acetylhydrolase 1b, catalytic subunit 3 [Source:RGD Symbol;Acc:620333]
ENSRNOG00000018606	397.594	0.430776	0.129093	3.33695	0.000847024	0.00445552	ENSRNOG00000018606	Olr59	olfactory receptor 59 [Source:RGD Symbol;Acc:628858]
ENSRNOG00000019501	742.498	0.160461	0.0815298	1.96813	0.0490529	0.119557	ENSRNOG00000019501	Rmnd1	required for meiotic nuclear division 1 homolog [Source:RGD Symbol;Acc:1309546]
ENSRNOG00000017897	76.381	0.925938	0.246923	3.7499	0.000176903	0.00119703	ENSRNOG00000017897	Adam8	ADAM metallopeptidase domain 8 [Source:RGD Symbol;Acc:1566394]
ENSRNOG00000016791	566.224	-0.0107805	0.0969339	-0.111215	0.911446	0.947688	ENSRNOG00000016791	Chka	choline kinase alpha [Source:RGD Symbol;Acc:61944]
ENSRNOG00000021058	290.046	0.0892015	0.11694	0.762797	0.445585	0.60464	ENSRNOG00000021058	Grwd1	glutamate-rich WD repeat containing 1 [Source:RGD Symbol;Acc:1310649]
ENSRNOG00000012692	380.21	-0.224967	0.110063	-2.04398	0.0409554	0.104283	ENSRNOG00000012692	Riok2	RIO kinase 2 [Source:RGD Symbol;Acc:1311588]
ENSRNOG00000013351	1714	0.0973809	0.0822507	1.18395	0.236432	0.390824	ENSRNOG00000013351	Stxbp5	syntaxin binding protein 5 [Source:RGD Symbol;Acc:708517]
ENSRNOG00000017509	320.657	0.0198437	0.132113	0.150203	0.880605	0.928524	ENSRNOG00000017509	Eed	embryonic ectoderm development [Source:RGD Symbol;Acc:1309782]
ENSRNOG00000018515	63.2634	-0.215962	0.264064	-0.817839	0.413449	0.575565	ENSRNOG00000018515	Det1	DET1 partner of COP1 E3 ubiquitin ligase [Source:RGD Symbol;Acc:1309793]
ENSRNOG00000031927	210.098	-0.427061	0.195244	-2.18732	0.028719	0.0789828	ENSRNOG00000031927	Klk6	kallikrein related-peptidase 6 [Source:RGD Symbol;Acc:3419]
ENSRNOG00000022164	77.069	0.0684507	0.224804	0.304491	0.760754	0.85239	ENSRNOG00000022164	Zscan2	zinc finger and SCAN domain containing 2 [Source:RGD Symbol;Acc:1584548]
ENSRNOG00000021063	156.852	0.106306	0.163069	0.651911	0.514459	0.664061	ENSRNOG00000021063	Grin2d	glutamate ionotropic receptor NMDA type subunit 2D [Source:RGD Symbol;Acc:2740]
ENSRNOG00000013407	103.949	0.055559	0.246922	0.225006	0.821975	0.890846	ENSRNOG00000013407	Slc5a11	solute carrier family 5 member 11 [Source:RGD Symbol;Acc:621410]
ENSRNOG00000039076	259.631	0.167052	0.14067	1.18755	0.235011	0.38931	ENSRNOG00000039076	Spaca6	sperm acrosome associated 6 [Source:RGD Symbol;Acc:1588836]
ENSRNOG00000019489	685.152	0.0057401	0.100091	0.057349	0.954267	0.974626	ENSRNOG00000019489	Armt1	acidic residue methyltransferase 1 [Source:RGD Symbol;Acc:1305235]
ENSRNOG00000031739	93.4682	0.0692772	0.210116	0.329709	0.74162	0.839203	ENSRNOG00000031739	Garin5a	golgi associated RAB2 interactor 5A [Source:RGD Symbol;Acc:1311142]
ENSRNOG00000020235	5695.16	-0.0601457	0.0503499	-1.19455	0.232261	0.385842	ENSRNOG00000020235	Hnrnpl	heterogeneous nuclear ribonucleoprotein L [Source:RGD Symbol;Acc:71059]
ENSRNOG00000021130	810.451	0.0368957	0.109234	0.337769	0.735538	0.834764	ENSRNOG00000021130	Abcc8	ATP binding cassette subfamily C member 8 [Source:RGD Symbol;Acc:3786]
ENSRNOG00000021017	2662.8	0.149121	0.0651301	2.28958	0.0220455	0.0640573	ENSRNOG00000021017	Car11	carbonic anhydrase 11 [Source:RGD Symbol;Acc:735155]
ENSRNOG00000010994	56.2715	-0.0557525	0.264687	-0.210636	0.833171	0.897934	ENSRNOG00000010994	Has1	hyaluronan synthase 1 [Source:RGD Symbol;Acc:708528]
ENSRNOG00000012988	2300.54	-0.115717	0.105097	-1.10105	0.270876	0.428163	ENSRNOG00000012988	Lix1	limb and CNS expressed 1 [Source:RGD Symbol;Acc:1309454]
ENSRNOG00000021027	2758.38	-0.431676	0.0563951	-7.6545	1.94064e-14	1.36467e-12	ENSRNOG00000021027	Dbp	D-box binding PAR bZIP transcription factor [Source:RGD Symbol;Acc:2491]
ENSRNOG00000042686	109.626	0.276436	0.221352	1.24885	0.211721	0.361275	ENSRNOG00000042686	Trim34	tripartite motif-containing 34 [Source:RGD Symbol;Acc:7240857]
ENSRNOG00000014610	113.879	-0.402902	0.205809	-1.95766	0.0502705	0.121838	ENSRNOG00000014610	Anpep	alanyl aminopeptidase, membrane [Source:RGD Symbol;Acc:2991]
ENSRNOG00000020882	195.024	-0.115235	0.151955	-0.758352	0.44824	0.60622	ENSRNOG00000020882	Shkbp1	Sh3kbp1 binding protein 1 [Source:RGD Symbol;Acc:1309281]
ENSRNOG00000067926	3906.47	0.0713831	0.0531604	1.34279	0.179341	0.321083	ENSRNOG00000067926
ENSRNOG00000019627	20.5249	0.15789	0.460233	0.343066	0.731548	0.831778	ENSRNOG00000019627	Mybpc2	myosin binding protein C2 [Source:RGD Symbol;Acc:1311596]
ENSRNOG00000016940	945.815	-0.00061043	0.0809328	-0.00754242	0.993982	0.997332	ENSRNOG00000016940	Ppp2r2d	protein phosphatase 2, regulatory subunit B, delta [Source:RGD Symbol;Acc:708356]
ENSRNOG00000015488	89.0427	0.669235	0.230745	2.90032	0.0037278	0.0153209	ENSRNOG00000015488	Tead1	TEA domain transcription factor 1 [Source:RGD Symbol;Acc:1549742]
ENSRNOG00000015609	322.674	0.299348	0.136785	2.18846	0.028636	0.0787817	ENSRNOG00000015609	Wdr27	WD repeat domain 27 [Source:RGD Symbol;Acc:1309633]
ENSRNOG00000030776	2518.19	-0.038397	0.0639838	-0.600106	0.548436	0.692767	ENSRNOG00000030776	Sytl2	synaptotagmin-like 2 [Source:RGD Symbol;Acc:1307647]
ENSRNOG00000020308	904.869	-0.407328	0.0783599	-5.19817	2.01258e-07	3.12673e-06	ENSRNOG00000020308	Ech1	enoyl-CoA hydratase 1 [Source:RGD Symbol;Acc:69353]
ENSRNOG00000021032	700.305	-0.256378	0.0837247	-3.06216	0.00219746	0.00986443	ENSRNOG00000021032	Sphk2	sphingosine kinase 2 [Source:RGD Symbol;Acc:1307757]
ENSRNOG00000017191	279.081	0.270062	0.160768	1.67982	0.0929925	0.196989	ENSRNOG00000017191	Trim5	tripartite motif-containing 5 [Source:RGD Symbol;Acc:1304579]
ENSRNOG00000070392	515.627	0.330832	0.136298	2.42727	0.015213	0.0476322	ENSRNOG00000070392	Spty2d1	SPT2 chromatin protein domain containing 1 [Source:RGD Symbol;Acc:2319415]
ENSRNOG00000018369	50.8083	-0.217699	0.272993	-0.797453	0.425188	0.587366	ENSRNOG00000018369	Prx	periaxin [Source:RGD Symbol;Acc:619960]
ENSRNOG00000023053	1518.95	0.175511	0.0676456	2.59456	0.00947107	0.0326445	ENSRNOG00000023053	Ice1	interactor of little elongation complex ELL subunit 1 [Source:RGD Symbol;Acc:1309747]
ENSRNOG00000033498	283.051	-0.481318	0.120661	-3.98901	6.63503e-05	0.000510817	ENSRNOG00000033498	Cib1	calcium and integrin binding 1 [Source:RGD Symbol;Acc:620133]
ENSRNOG00000070184	80.1622	0.813957	0.237701	3.42429	0.000616398	0.00341342	ENSRNOG00000070184	LOC100125364	RIKEN cDNA 1600012H06 gene [Source:MGI Symbol;Acc:MGI:1915162]
ENSRNOG00000065015	50.0025	-0.688672	0.30324	-2.27104	0.0231444	0.0665401	ENSRNOG00000065015
ENSRNOG00000012460	100.417	-0.0556498	0.220249	-0.252667	0.800525	0.877616	ENSRNOG00000012460	Cntf	ciliary neurotrophic factor [Source:RGD Symbol;Acc:2370]
ENSRNOG00000026163	1454.75	-0.0787887	0.0579869	-1.35873	0.174231	0.314039	ENSRNOG00000026163	Cpt1c	carnitine palmitoyltransferase 1c [Source:RGD Symbol;Acc:1305384]
ENSRNOG00000040242	300.248	0.440173	0.165205	2.66441	0.00771235	0.0276797	ENSRNOG00000040242	Epm2a	EPM2A glucan phosphatase, laforin [Source:RGD Symbol;Acc:71047]
ENSRNOG00000021035	2326.99	-0.292784	0.0637242	-4.59455	4.33687e-06	4.69705e-05	ENSRNOG00000021035	Rpl18	ribosomal protein L18 [Source:RGD Symbol;Acc:621182]
ENSRNOG00000020675	1034.97	-0.21486	0.0770652	-2.78803	0.00530298	0.0204193	ENSRNOG00000020675	Ccdc97	coiled-coil domain containing 97 [Source:RGD Symbol;Acc:1309393]
ENSRNOG00000012036	214.031	0.418649	0.166918	2.50811	0.0121378	0.0398102	ENSRNOG00000012036	Pcsk5	proprotein convertase subtilisin/kexin type 5 [Source:RGD Symbol;Acc:620326]
ENSRNOG00000021800	42.7832	-0.405456	0.308329	-1.31501	0.188506	0.332396	ENSRNOG00000021800	Zfp541	zinc finger protein 541 [Source:RGD Symbol;Acc:1310756]
ENSRNOG00000015551	514.857	-0.459558	0.0989842	-4.64274	3.43825e-06	3.84859e-05	ENSRNOG00000015551	Fuca2	alpha-L-fucosidase 2 [Source:RGD Symbol;Acc:1303053]
ENSRNOG00000020683	2298.11	-0.242285	0.0547361	-4.42643	9.58046e-06	9.40575e-05	ENSRNOG00000020683	Hnrnpul1	heterogeneous nuclear ribonucleoprotein U-like 1 [Source:RGD Symbol;Acc:1307456]
ENSRNOG00000019283	52.9532	-0.191007	0.288533	-0.661993	0.507976	0.658548	ENSRNOG00000019283	P2ry2	purinergic receptor P2Y2 [Source:RGD Symbol;Acc:62088]
ENSRNOG00000055650	153.603	0.272359	0.16287	1.67225	0.0944752	0.19921	ENSRNOG00000055650	Pou2f2	POU class 2 homeobox 2 [Source:RGD Symbol;Acc:621690]
ENSRNOG00000064293	328.117	0.204899	0.132018	1.55206	0.120649	0.239846	ENSRNOG00000064293	Gdpgp1	GDP-D-glucose phosphorylase 1 [Source:RGD Symbol;Acc:1560277]
ENSRNOG00000014434	639.805	0.223912	0.0951343	2.35364	0.0185906	0.0559544	ENSRNOG00000014434	Chd1	chromodomain helicase DNA binding protein 1 [Source:RGD Symbol;Acc:1306794]
ENSRNOG00000014290	571.404	0.716934	0.126703	5.6584	1.5279e-08	3.06769e-07	ENSRNOG00000014290	Grm1	glutamate metabotropic receptor 1 [Source:RGD Symbol;Acc:2742]
ENSRNOG00000020812	677.143	-0.26807	0.0973985	-2.7523	0.00591777	0.022341	ENSRNOG00000020812	Gys1	glycogen synthase 1 [Source:RGD Symbol;Acc:1589798]
ENSRNOG00000020546	259.248	-0.523795	0.144728	-3.61916	0.000295557	0.00184764	ENSRNOG00000020546	Lipe	lipase E, hormone sensitive type [Source:RGD Symbol;Acc:3010]
ENSRNOG00000012524	4570.39	0.216886	0.0582703	3.72206	0.000197601	0.00132006	ENSRNOG00000012524	Zfp91	zinc finger protein 91 [Source:RGD Symbol;Acc:628736]
ENSRNOG00000042777	194.221	0.299724	0.153148	1.95708	0.0503375	0.12196	ENSRNOG00000042777	Zfp78	zinc finger protein 28 [Source:RGD Symbol;Acc:7679103]
ENSRNOG00000012103	27.6861	0.406216	0.402436	1.00939	0.312787	0.474312	ENSRNOG00000012103	Nmbr	neuromedin B receptor [Source:RGD Symbol;Acc:3181]
ENSRNOG00000019728	300.964	0.0144385	0.154463	0.0934753	0.925526	0.956572	ENSRNOG00000019728	Itgad	integrin subunit alpha M [Source:RGD Symbol;Acc:2926]
ENSRNOG00000046874	266.577	-0.129873	0.134481	-0.965735	0.334177	0.497206	ENSRNOG00000046874	Snx9	sorting nexin 9 [Source:RGD Symbol;Acc:1584466]
ENSRNOG00000027405	2034.25	0.333184	0.0770883	4.32211	1.54541e-05	0.000143118	ENSRNOG00000027405	Ccp110	centriolar coiled-coil protein 110 [Source:RGD Symbol;Acc:1310509]
ENSRNOG00000026109	1557.26	-0.156429	0.0691428	-2.2624	0.0236726	0.0677446	ENSRNOG00000026109	Prmt1	protein arginine methyltransferase 1 [Source:RGD Symbol;Acc:62020]
ENSRNOG00000021046	80.3501	0.0691205	0.215254	0.321111	0.748127	0.844357	ENSRNOG00000021046	Sult2b1	sulfotransferase family 2B member 1 [Source:RGD Symbol;Acc:1308882]
ENSRNOG00000015660	549.004	-0.00586666	0.0920379	-0.0637418	0.949176	0.971451	ENSRNOG00000015660	Pex3	peroxisomal biogenesis factor 3 [Source:RGD Symbol;Acc:621636]
ENSRNOG00000017854	514.206	-0.626678	0.124123	-5.04886	4.44455e-07	6.26285e-06	ENSRNOG00000017854	Ucp2	uncoupling protein 2 [Source:RGD Symbol;Acc:3932]
ENSRNOG00000001488	3041.39	-0.198253	0.0576617	-3.43821	0.000585578	0.00327482	ENSRNOG00000001488	Psmb1	proteasome 20S subunit beta 1 [Source:RGD Symbol;Acc:621092]
ENSRNOG00000020713	538.548	-0.330829	0.0965873	-3.42518	0.000614396	0.00340361	ENSRNOG00000020713	Osbpl5	oxysterol binding protein-like 5 [Source:RGD Symbol;Acc:1308402]
ENSRNOG00000064385	7231.98	-0.530089	0.0662298	-8.00378	1.20658e-15	1.08923e-13	ENSRNOG00000064385	Ftl1	ferritin light chain 1 [Source:RGD Symbol;Acc:61813]
ENSRNOG00000046983	175.365	0.149412	0.15522	0.962584	0.335756	0.498647	ENSRNOG00000046983	Adat2	adenosine deaminase, tRNA-specific 2 [Source:RGD Symbol;Acc:1309642]
ENSRNOG00000012611	147.813	-0.339905	0.160582	-2.1167	0.0342851	0.0905947	ENSRNOG00000012611	Lpxn	leupaxin [Source:RGD Symbol;Acc:1304981]
ENSRNOG00000018773	231.116	0.0771222	0.151478	0.50913	0.610661	0.743262	ENSRNOG00000018773	Mtrf1l	mitochondrial translation release factor 1 like [Source:RGD Symbol;Acc:1598312]
ENSRNOG00000017508	293.881	0.138481	0.13959	0.992057	0.32117	0.483036	ENSRNOG00000017508	Kmt5c	lysine methyltransferase 5C [Source:RGD Symbol;Acc:1305226]
ENSRNOG00000010853	240.177	0.202315	0.172356	1.17382	0.240469	0.39541	ENSRNOG00000010853	Chrna7	cholinergic receptor nicotinic alpha 7 subunit [Source:RGD Symbol;Acc:2348]
ENSRNOG00000019555	646.199	-0.238387	0.110547	-2.15644	0.0310495	0.0841147	ENSRNOG00000019555	Arap1	ArfGAP with RhoGAP domain, ankyrin repeat and PH domain 1 [Source:RGD Symbol;Acc:1310385]
ENSRNOG00000020876	448.142	-0.141618	0.112936	-1.25397	0.209853	0.359046	ENSRNOG00000020876	Bax	BCL2 associated X, apoptosis regulator [Source:RGD Symbol;Acc:2192]
ENSRNOG00000037814	23.7466	-0.668219	0.389725	-1.71459	0.0864203	0.185903	ENSRNOG00000037814	Cxcl17	C-X-C motif chemokine ligand 17 [Source:RGD Symbol;Acc:1304717]
ENSRNOG00000034184	98.3647	0.194227	0.212632	0.913444	0.361009	0.523611	ENSRNOG00000034184	Zfp583	zinc finger protein 583 [Source:RGD Symbol;Acc:1562044]
ENSRNOG00000020233	2636.88	-0.188758	0.0777413	-2.42803	0.0151813	0.0475811	ENSRNOG00000020233	Rabac1	Rab acceptor 1 [Source:RGD Symbol;Acc:621002]
ENSRNOG00000018808	1063.13	0.180222	0.101747	1.77127	0.0765154	0.169394	ENSRNOG00000018808	Vip	vasoactive intestinal peptide [Source:RGD Symbol;Acc:621647]
ENSRNOG00000020883	161.749	0.498325	0.166603	2.9911	0.00277977	0.0119913	ENSRNOG00000020883	Dhdh	dihydrodiol dehydrogenase [Source:RGD Symbol;Acc:1588686]
ENSRNOG00000001489	243.786	0.264984	0.133474	1.98528	0.0471132	0.115732	ENSRNOG00000001489	Tbp	TATA box binding protein [Source:RGD Symbol;Acc:67398]
ENSRNOG00000024414	1115.03	0.423501	0.0876449	4.83201	1.35161e-06	1.69638e-05	ENSRNOG00000024414	Ate1	arginyltransferase 1 [Source:RGD Symbol;Acc:1309335]
ENSRNOG00000046971	25.5788	0.863761	0.405242	2.13147	0.0330506	0.0880931	ENSRNOG00000046971	Ccer2	coiled-coil glutamate-rich protein 2 [Source:RGD Symbol;Acc:6502457]
ENSRNOG00000033906	283.26	-0.0284023	0.11873	-0.239218	0.810937	0.884205	ENSRNOG00000033906	Zfp667	zinc finger protein 667 [Source:RGD Symbol;Acc:1359114]
ENSRNOG00000027784	25.0856	-0.142046	0.409551	-0.346833	0.728717	0.829814	ENSRNOG00000027784	Tsku	tsukushi, small leucine rich proteoglycan [Source:RGD Symbol;Acc:1359311]
ENSRNOG00000021048	2311.81	-0.193988	0.0988484	-1.96248	0.0497062	0.120649	ENSRNOG00000021048	Lmtk3	lemur tyrosine kinase 3 [Source:RGD Symbol;Acc:1588641]
ENSRNOG00000018690	610.641	0.920113	0.126315	7.28427	3.2341e-13	1.84231e-11	ENSRNOG00000018690	Rgs17	regulator of G-protein signaling 17 [Source:RGD Symbol;Acc:1305515]
ENSRNOG00000011540	1391.93	-0.133493	0.067971	-1.96397	0.049534	0.120351	ENSRNOG00000011540	Vta1	vesicle trafficking 1 [Source:RGD Symbol;Acc:1305031]
ENSRNOG00000020063	224.48	-0.0711285	0.128172	-0.554944	0.578933	0.717478	ENSRNOG00000020063	Nfkbib	NFKB inhibitor beta [Source:RGD Symbol;Acc:621887]
ENSRNOG00000017678	449.19	-0.0807138	0.103484	-0.779965	0.435412	0.595888	ENSRNOG00000017678	Ap2b1-ps1	adaptor related protein complex 2 subunit beta 1, pseudogene 1 [Source:RGD Symbol;Acc:1595515]
ENSRNOG00000011476	238.225	0.175846	0.136936	1.28415	0.19909	0.345989	ENSRNOG00000011476	Nars2	asparaginyl-tRNA synthetase 2, mitochondrial [Source:RGD Symbol;Acc:1305145]
ENSRNOG00000024460	746.148	-0.169864	0.0827846	-2.05189	0.0401808	0.102559	ENSRNOG00000024460	Tars3	threonyl-tRNA synthetase 3 [Source:RGD Symbol;Acc:1311308]
ENSRNOG00000020982	5585.86	-0.547859	0.0592896	-9.24038	2.45616e-20	4.24685e-18	ENSRNOG00000020982	Fau	similar to Finkel-Biskis-Reilly murine sarcoma virusubiquitously expressed [Source:RGD Symbol;Acc:1597505]
ENSRNOG00000001490	258.889	0.0412372	0.13083	0.315197	0.752612	0.847378	ENSRNOG00000001490	Pdcd2	programmed cell death 2 [Source:RGD Symbol;Acc:61887]
ENSRNOG00000011480	701.306	0.228652	0.0956068	2.39159	0.0167756	0.0515367	ENSRNOG00000011480	Tubgcp5	tubulin, gamma complex associated protein 5 [Source:RGD Symbol;Acc:1304689]
ENSRNOG00000020578	43.196	0.289088	0.374318	0.772308	0.439932	0.600119	ENSRNOG00000020578	Ceacam1	CEA cell adhesion molecule 1 [Source:RGD Symbol;Acc:67396]
ENSRNOG00000012872	117.62	0.244356	0.199772	1.22318	0.221263	0.372925	ENSRNOG00000012872	Carnmt1	carnosine N-methyltransferase 1 [Source:RGD Symbol;Acc:1311863]
ENSRNOG00000010087	232.738	0.05376	0.131631	0.408416	0.682968	0.797054	ENSRNOG00000010087	Zfp143	zinc finger protein 143 [Source:RGD Symbol;Acc:1305662]
ENSRNOG00000021493	32.576	-0.217139	0.374271	-0.580164	0.561804	0.7032	ENSRNOG00000021493	Prdm9	PR/SET domain 9 [Source:RGD Symbol;Acc:1305247]
ENSRNOG00000020889	5851.17	-0.143697	0.0473919	-3.03211	0.0024285	0.0107279	ENSRNOG00000020889	Nucb1	nucleobindin 1 [Source:RGD Symbol;Acc:620030]
ENSRNOG00000047575	205.709	-0.621862	0.160038	-3.88573	0.000102023	0.000741928	ENSRNOG00000047575	Dhx34	DExH-box helicase 34 [Source:RGD Symbol;Acc:1584452]
ENSRNOG00000061450	295.497	0.341103	0.131753	2.58896	0.00962654	0.0330796	ENSRNOG00000061450	Homer2	homer scaffold protein 2 [Source:RGD Symbol;Acc:620705]
ENSRNOG00000020102	3843.16	-0.331128	0.062853	-5.26828	1.37704e-07	2.25121e-06	ENSRNOG00000020102	Sirt2	sirtuin 2 [Source:RGD Symbol;Acc:621481]
ENSRNOG00000017429	20.5686	0.799752	0.453317	1.76422	0.0776946	0.171376	ENSRNOG00000017429	Lat	linker for activation of T cells [Source:RGD Symbol;Acc:620802]
ENSRNOG00000010753	1035.37	-0.000179184	0.0697913	-0.00256743	0.997951	0.998971	ENSRNOG00000010753	Aig1	androgen-induced 1 [Source:RGD Symbol;Acc:1562920]
ENSRNOG00000020605	351.1	0.373692	0.14036	2.66238	0.00775904	0.0278203	ENSRNOG00000020605	Pstk	phosphoseryl-tRNA kinase [Source:RGD Symbol;Acc:1564300]
ENSRNOG00000012576	861.592	-0.128281	0.0885663	-1.44841	0.147501	0.277464	ENSRNOG00000012576	Selenos	selenoprotein S [Source:RGD Symbol;Acc:628897]
ENSRNOG00000015517	335.21	-0.24847	0.120079	-2.06923	0.0385248	0.099403	ENSRNOG00000015517	Zfp444	zinc finger protein 444 [Source:RGD Symbol;Acc:1304847]
ENSRNOG00000017030	1523.98	0.0624106	0.0741031	0.842213	0.399669	0.562207	ENSRNOG00000017030	Arid1b	AT-rich interaction domain 1B [Source:RGD Symbol;Acc:708504]
ENSRNOG00000025644	412.892	0.350342	0.10238	3.42196	0.000621718	0.0034377	ENSRNOG00000025644	C1h9orf40	similar to human chromosome 9 open reading frame 40 [Source:RGD Symbol;Acc:1563237]
ENSRNOG00000013663	166.423	-0.361925	0.15393	-2.35123	0.0187116	0.0562374	ENSRNOG00000013663	Tmem86a	transmembrane protein 86A [Source:RGD Symbol;Acc:1305749]
ENSRNOG00000047035	170.416	-0.142946	0.177621	-0.80478	0.420947	0.582603	ENSRNOG00000047035	Fadd	Fas associated via death domain [Source:RGD Symbol;Acc:628700]
ENSRNOG00000015658	2413.61	0.106905	0.0611078	1.74946	0.0802121	0.175705	ENSRNOG00000015658	Sorbs1	sorbin and SH3 domain containing 1 [Source:RGD Symbol;Acc:1586598]
ENSRNOG00000024580	77.8273	-0.551181	0.248494	-2.21809	0.0265487	0.0743213	ENSRNOG00000024580	Mamstr	MEF2 activating motif and SAP domain containing transcriptional regulator [Source:RGD Symbol;Acc:1588652]
ENSRNOG00000014791	8637.18	0.44212	0.0767012	5.76419	8.20522e-09	1.74266e-07	ENSRNOG00000014791	Peg3	paternally expressed 3 [Source:RGD Symbol;Acc:2323590]
ENSRNOG00000019249	4095.5	0.201858	0.0607691	3.32172	0.000894637	0.00467111	ENSRNOG00000019249	Ap3b2	adaptor related protein complex 3 subunit beta 2 [Source:RGD Symbol;Acc:1308950]
ENSRNOG00000011290	644.338	-0.145813	0.0991794	-1.47019	0.14151	0.269295	ENSRNOG00000011290	Tm2d3	TM2 domain containing 3 [Source:RGD Symbol;Acc:1564929]
ENSRNOG00000019485	1540.99	-0.114448	0.0674562	-1.69663	0.0897662	0.191563	ENSRNOG00000019485	Bckdk	lysine acetyltransferase 8 [Source:RGD Symbol;Acc:1311512]
ENSRNOG00000015822	1451.67	-0.0631815	0.0695691	-0.908184	0.363781	0.526537	ENSRNOG00000015822	Klf13	KLF transcription factor 13 [Source:RGD Symbol;Acc:1565099]
ENSRNOG00000015456	167.265	-0.133757	0.153034	-0.874035	0.382099	0.545109	ENSRNOG00000015456	Zfp787	zinc finger protein 787 [Source:RGD Symbol;Acc:1310536]
ENSRNOG00000020310	3545.26	-0.418579	0.0542846	-7.71083	1.25e-14	9.27838e-13	ENSRNOG00000020310	Grik5	glutamate ionotropic receptor kainate type subunit 5 [Source:RGD Symbol;Acc:2735]
ENSRNOG00000020669	82.2733	0.146144	0.24128	0.605706	0.54471	0.69019	ENSRNOG00000020669	Ovol1	ovo like transcriptional repressor 1 [Source:RGD Symbol;Acc:1306956]
ENSRNOG00000020699	113.161	-0.259771	0.190928	-1.36057	0.173651	0.313377	ENSRNOG00000020699	Cd37	CD37 molecule [Source:RGD Symbol;Acc:62035]
ENSRNOG00000021507	3070.88	0.473276	0.0802629	5.89657	3.7114e-09	8.46995e-08	ENSRNOG00000021507	Luzp2	leucine zipper protein 2 [Source:RGD Symbol;Acc:6496163]
ENSRNOG00000006962	2889.46	-0.23535	0.0772551	-3.04641	0.00231594	0.0102956	ENSRNOG00000006962	Stk32c	serine/threonine kinase 32C [Source:RGD Symbol;Acc:1305864]
ENSRNOG00000018012	2907.81	0.446379	0.0848649	5.25987	1.44155e-07	2.34104e-06	ENSRNOG00000018012	Tulp4	TUB like protein 4 [Source:RGD Symbol;Acc:1564487]
ENSRNOG00000069456	79.9133	-0.16694	0.225427	-0.740548	0.458967	0.615685	ENSRNOG00000069456
ENSRNOG00000015180	372.365	0.17232	0.105482	1.63364	0.102334	0.211337	ENSRNOG00000015180	Kdm8	lysine demethylase 8 [Source:RGD Symbol;Acc:1304823]
ENSRNOG00000013123	89.4092	0.348422	0.228529	1.52463	0.127351	0.249291	ENSRNOG00000013123	Scube2	signal peptide, CUB domain and EGF like domain containing 2 [Source:RGD Symbol;Acc:1563998]
ENSRNOG00000020164	370.922	-0.0883378	0.113629	-0.777426	0.436908	0.597435	ENSRNOG00000020164	Ifitm10	interferon induced transmembrane protein 10 [Source:RGD Symbol;Acc:1563319]
ENSRNOG00000031662	38.7397	0.326508	0.311818	1.04711	0.295049	0.455163	ENSRNOG00000031662	Slc6a5	solute carrier family 6 member 5 [Source:RGD Symbol;Acc:621824]
ENSRNOG00000026861	528.17	-0.00176657	0.110221	-0.0160275	0.987212	0.993576	ENSRNOG00000026861	Zscan18	zinc finger and SCAN domain containing 18 [Source:RGD Symbol;Acc:1560671]
ENSRNOG00000014465	19.3995	0.225652	0.495813	0.455115	0.649027	0.771868	ENSRNOG00000014465	Oca2	OCA2 melanosomal transmembrane protein [Source:RGD Symbol;Acc:2318412]
ENSRNOG00000029049	656.058	-0.149666	0.103167	-1.45071	0.146861	0.276684	ENSRNOG00000029049	Zdhhc14	zinc finger DHHC-type palmitoyltransferase 14 [Source:RGD Symbol;Acc:1565877]
ENSRNOG00000017220	270.236	-0.0817982	0.133531	-0.61258	0.540154	0.6862	ENSRNOG00000017220	Tcirg1	T-cell immune regulator 1, ATPase H+ transporting V0 subunit A3 [Source:RGD Symbol;Acc:735136]
ENSRNOG00000016490	40.3336	-0.195746	0.299513	-0.653546	0.513404	0.663108	ENSRNOG00000016490	Nox3	NADPH oxidase 3 [Source:RGD Symbol;Acc:1303190]
ENSRNOG00000014779	1855.79	-0.0228846	0.0614854	-0.372195	0.709748	0.816082	ENSRNOG00000014779	Pdcd4	programmed cell death 4 [Source:RGD Symbol;Acc:620816]
ENSRNOG00000031459	268.378	-0.247407	0.127182	-1.9453	0.051739	0.124637	ENSRNOG00000031459	Znf8	zinc finger protein 8 [Source:RGD Symbol;Acc:41193534]
ENSRNOG00000018336	295.609	0.149845	0.118139	1.26838	0.204662	0.353083	ENSRNOG00000018336	Eps8l2	EPS8-like 2 [Source:RGD Symbol;Acc:1310912]
ENSRNOG00000021011	39.8988	0.271472	0.330854	0.820519	0.41192	0.574052	ENSRNOG00000021011	Fut2	fucosyltransferase 2 [Source:RGD Symbol;Acc:2639]
ENSRNOG00000055761	1295.81	-0.228351	0.080906	-2.82243	0.00476615	0.0187094	ENSRNOG00000055761	Zfp574	zinc finger protein 574 [Source:RGD Symbol;Acc:1311420]
ENSRNOG00000009891	655.645	0.226936	0.111514	2.03505	0.0418454	0.106071	ENSRNOG00000009891	Pcf11	PCF11 cleavage and polyadenylation factor subunit [Source:RGD Symbol;Acc:1563397]
ENSRNOG00000011058	2160.36	0.27165	0.0781768	3.47481	0.000511215	0.00292803	ENSRNOG00000011058	Utrn	utrophin [Source:RGD Symbol;Acc:3947]
ENSRNOG00000031113	245.01	-0.157659	0.157852	-0.99878	0.317901	0.479889	ENSRNOG00000031113	Zscan22	zinc finger and SCAN domain containing 22 [Source:RGD Symbol;Acc:7606541]
ENSRNOG00000015972	80.2782	0.652798	0.325225	2.00722	0.0447266	0.111623	ENSRNOG00000015972	Ano5	anoctamin 5 [Source:RGD Symbol;Acc:1564265]
ENSRNOG00000047019	149.223	-0.186769	0.167574	-1.11455	0.265044	0.422032	ENSRNOG00000047019	Bbip1	BBSome interacting protein 1 [Source:RGD Symbol;Acc:6498801]
ENSRNOG00000011077	3260.7	0.131652	0.0762115	1.72745	0.084086	0.182058	ENSRNOG00000011077	Tjp1	tight junction protein 1 [Source:RGD Symbol;Acc:1306305]
ENSRNOG00000052687	2765.49	0.0331187	0.0883037	0.375055	0.70762	0.814336	ENSRNOG00000052687	Megf8	multiple EGF-like-domains 8 [Source:RGD Symbol;Acc:621190]
ENSRNOG00000019453	2521.44	-0.185175	0.0662112	-2.79673	0.00516224	0.0199499	ENSRNOG00000019453	Rps5	ribosomal protein S5 [Source:RGD Symbol;Acc:3601]
ENSRNOG00000015339	1341.59	0.3645	0.0752825	4.84176	1.28694e-06	1.62492e-05	ENSRNOG00000015339	Shoc2	SHOC2 leucine-rich repeat scaffold protein [Source:RGD Symbol;Acc:1308146]
ENSRNOG00000051208	50.1184	-0.962254	0.336072	-2.86324	0.00419334	0.0168941	ENSRNOG00000051208	Selenov	selenoprotein V [Source:RGD Symbol;Acc:1562943]
ENSRNOG00000016697	130.528	0.159032	0.169296	0.939369	0.347541	0.510628	ENSRNOG00000016697	Lrrc56	leucine rich repeat containing 56 [Source:RGD Symbol;Acc:1311654]
ENSRNOG00000020206	6869.82	-0.0997518	0.0476789	-2.09216	0.0364245	0.0952037	ENSRNOG00000020206	Ctsd	cathepsin D [Source:RGD Symbol;Acc:621511]
ENSRNOG00000027436	203.436	0.163455	0.137191	1.19143	0.233483	0.387608	ENSRNOG00000027436	Zfp324	zinc finger protein 324 [Source:RGD Symbol;Acc:1306631]
ENSRNOG00000062814	5991.71	-0.029654	0.0650442	-0.455906	0.648458	0.771628	ENSRNOG00000062814	Cend1	cell cycle exit and neuronal differentiation 1 [Source:RGD Symbol;Acc:1309401]
ENSRNOG00000018524	2195.62	-0.476576	0.093822	-5.07958	3.78271e-07	5.48269e-06	ENSRNOG00000018524	Ezr	ezrin [Source:RGD Symbol;Acc:621161]
ENSRNOG00000016147	202.163	0.496461	0.230237	2.1563	0.0310601	0.0841147	ENSRNOG00000016147	Slc17a6	solute carrier family 17 member 6 [Source:RGD Symbol;Acc:620531]
ENSRNOG00000021056	228.583	-0.0150611	0.154656	-0.0973841	0.922421	0.954437	ENSRNOG00000021056	Kcnj14	potassium inwardly-rectifying channel, subfamily J, member 14 [Source:RGD Symbol;Acc:628872]
ENSRNOG00000037638	733.407	-0.146336	0.0878476	-1.66579	0.0957549	0.201245	ENSRNOG00000037638	Timm50	translocase of inner mitochondrial membrane 50 [Source:RGD Symbol;Acc:1587684]
ENSRNOG00000019199	124.899	-0.39265	0.19095	-2.0563	0.0397536	0.101702	ENSRNOG00000019199	Cracr2b	calcium release activated channel regulator 2B [Source:RGD Symbol;Acc:1560911]
ENSRNOG00000015218	444.936	-0.154308	0.117327	-1.31519	0.188444	0.332396	ENSRNOG00000015218	Nsmce1	NSE1 homolog, SMC5-SMC6 complex component [Source:RGD Symbol;Acc:1307760]
ENSRNOG00000015030	977.645	-0.173458	0.122141	-1.42015	0.155564	0.288569	ENSRNOG00000015030	Tjp2	tight junction protein 2 [Source:RGD Symbol;Acc:619807]
ENSRNOG00000011015	5618.96	0.18043	0.0791741	2.2789	0.0226731	0.0654026	ENSRNOG00000011015	Hivep2	HIVEP zinc finger 2 [Source:RGD Symbol;Acc:61988]
ENSRNOG00000020700	139.627	-0.15163	0.166727	-0.90945	0.363112	0.525987	ENSRNOG00000020700	Rnaseh2c	ribonuclease H2, subunit C [Source:RGD Symbol;Acc:2319141]
ENSRNOG00000016327	385.758	-0.315472	0.11814	-2.67032	0.007578	0.0272975	ENSRNOG00000016327	Mcee	methylmalonyl CoA epimerase [Source:RGD Symbol;Acc:1309966]
ENSRNOG00000014829	457.897	-0.0191201	0.109041	-0.175347	0.860807	0.915885	ENSRNOG00000014829	Prmt3	protein arginine methyltransferase 3 [Source:RGD Symbol;Acc:620413]
ENSRNOG00000020044	556.79	-0.0774325	0.0953324	-0.812237	0.416656	0.578516	ENSRNOG00000020044	Mob2	MOB kinase activator 2 [Source:RGD Symbol;Acc:1562983]
ENSRNOG00000016595	62.0556	-0.218028	0.286579	-0.760796	0.446779	0.605563	ENSRNOG00000016595	Hhex	hematopoietically expressed homeobox [Source:RGD Symbol;Acc:619932]
ENSRNOG00000056940	436.835	0.662589	0.160134	4.13773	3.50763e-05	0.000295131	ENSRNOG00000056940	Cited2	Cbp/p300-interacting transactivator, with Glu/Asp-rich carboxy-terminal domain, 2 [Source:RGD Symbol;Acc:620112]
ENSRNOG00000029490	316.504	-0.330258	0.124494	-2.65281	0.00798251	0.0284755	ENSRNOG00000029490	Znf768	zinc finger protein 768 [Source:RGD Symbol;Acc:7609558]
ENSRNOG00000009462	428.843	0.101267	0.133071	0.761004	0.446655	0.605468	ENSRNOG00000009462	Ccdc90b	coiled-coil domain containing 90B [Source:RGD Symbol;Acc:1308637]
ENSRNOG00000060429	298.882	0.0303285	0.111533	0.271924	0.78568	0.868569	ENSRNOG00000060429	Zfp446	zinc finger protein 446 [Source:RGD Symbol;Acc:7612453]
ENSRNOG00000063416	25.344	0.918165	0.456177	2.01274	0.0441419	0.110426	ENSRNOG00000063416	Vom1r19
ENSRNOG00000051450	278.503	0.171904	0.116713	1.47288	0.140783	0.268225	ENSRNOG00000051450	Abracl	ABRA C-terminal like [Source:RGD Symbol;Acc:1583256]
ENSRNOG00000061012	946.386	-0.135064	0.0714262	-1.89096	0.058629	0.137296	ENSRNOG00000061012	Kat5	lysine acetyltransferase 5 [Source:RGD Symbol;Acc:621061]
ENSRNOG00000021118	3265.27	-0.0623181	0.0494317	-1.26069	0.20742	0.356461	ENSRNOG00000021118	Nomo1	Nodal modulator 1 [Source:RGD Symbol;Acc:1305240]
ENSRNOG00000053735	134.697	-0.175775	0.166393	-1.05638	0.290794	0.450206	ENSRNOG00000053735	Hebp2	heme binding protein 2 [Source:RGD Symbol;Acc:1311553]
ENSRNOG00000015911	282.378	-0.328606	0.126808	-2.59138	0.00955926	0.0329022	ENSRNOG00000015911	Lrp5	LDL receptor related protein 5 [Source:RGD Symbol;Acc:1309329]
ENSRNOG00000032034	3981.19	-0.0224974	0.0556443	-0.404307	0.685987	0.799077	ENSRNOG00000032034	Supt5h	SPT5 homolog, DSIF elongation factor subunit [Source:RGD Symbol;Acc:1563807]
ENSRNOG00000061533	279.866	0.739401	0.140279	5.27093	1.35737e-07	2.22648e-06	ENSRNOG00000061533	Zfp945	zinc finger protein 945 [Source:RGD Symbol;Acc:2324317]
ENSRNOG00000009664	308.61	0.0141471	0.140742	0.100518	0.919933	0.953267	ENSRNOG00000009664	Ankrd42	ankyrin repeat domain 42 [Source:RGD Symbol;Acc:1310789]
ENSRNOG00000021025	3306.31	-0.241732	0.0523074	-4.62138	3.81203e-06	4.20611e-05	ENSRNOG00000021025	Ppp2r5b	protein phosphatase 2, regulatory subunit B', beta [Source:RGD Symbol;Acc:727786]
ENSRNOG00000011994	69.3053	-0.366304	0.252032	-1.4534	0.146112	0.275644	ENSRNOG00000011994	Perp	p53 apoptosis effector related to PMP22 [Source:RGD Symbol;Acc:1310294]
ENSRNOG00000026572	24.1515	-0.049386	0.427873	-0.115422	0.908111	0.94601	ENSRNOG00000026572	Zfp473	zinc finger protein 473 [Source:RGD Symbol;Acc:1305084]
ENSRNOG00000020719	29.9294	-0.682466	0.398281	-1.71353	0.0866158	0.186246	ENSRNOG00000020719	Hrc	histidine rich calcium binding protein [Source:RGD Symbol;Acc:727864]
ENSRNOG00000019560	12687.6	-0.122513	0.0569783	-2.15016	0.0315423	0.0851632	ENSRNOG00000019560	Pde2a	phosphodiesterase 2A [Source:RGD Symbol;Acc:620965]
ENSRNOG00000046480	87.4093	-0.285929	0.229958	-1.24339	0.213723	0.363972	ENSRNOG00000046480	Zfp764l1	zinc finger protein 764 like 1 [Source:RGD Symbol;Acc:1594599]
ENSRNOG00000017365	22.9623	-0.556837	0.399155	-1.39504	0.163004	0.298936	ENSRNOG00000017365	Klhl35	kelch-like family member 35 [Source:RGD Symbol;Acc:1565895]
ENSRNOG00000016807	2360.41	-0.035562	0.0608949	-0.58399	0.559227	0.701301	ENSRNOG00000016807	Oat	ornithine aminotransferase [Source:RGD Symbol;Acc:621724]
ENSRNOG00000015865	1869.12	-0.238143	0.0669045	-3.55944	0.000371645	0.00224315	ENSRNOG00000015865	Ap2s1	adaptor related protein complex 2 subunit sigma 1 [Source:RGD Symbol;Acc:620188]
ENSRNOG00000018007	935.823	-0.28737	0.0712548	-4.033	5.507e-05	0.00043655	ENSRNOG00000018007	Gtf2h5	general transcription factor IIH subunit 5 [Source:RGD Symbol;Acc:1560991]
ENSRNOG00000028753	306.132	-0.209363	0.135885	-1.54073	0.123382	0.243429	ENSRNOG00000028753	B9d2	B9 domain containing 2 [Source:RGD Symbol;Acc:1566122]
ENSRNOG00000020182	251.099	-0.393961	0.13903	-2.83364	0.00460211	0.0181918	ENSRNOG00000020182	Mvp	major vault protein [Source:RGD Symbol;Acc:70932]
ENSRNOG00000013190	574.637	-0.334933	0.113057	-2.96251	0.0030514	0.0130178	ENSRNOG00000013190	Rnaset2	ribonuclease T2 [Source:RGD Symbol;Acc:1309918]
ENSRNOG00000013795	244.926	0.152001	0.124841	1.21755	0.223394	0.37523	ENSRNOG00000013795	Asb7	ankyrin repeat and SOCS box-containing 7 [Source:RGD Symbol;Acc:1305154]
ENSRNOG00000060603	487.484	-0.313322	0.103566	-3.02533	0.00248361	0.0109221	ENSRNOG00000060603	Nhsl1	NHS-like 1 [Source:RGD Symbol;Acc:1308124]
ENSRNOG00000019970	629.613	0.0133083	0.101485	0.131136	0.895668	0.938583	ENSRNOG00000019970	mrpl11	mitochondrial ribosomal protein L11 [Source:RGD Symbol;Acc:1359665]
ENSRNOG00000061348	98.8591	-0.353769	0.202986	-1.74282	0.0813646	0.177579	ENSRNOG00000061348	Fam53b	family with sequence similarity 53, member B [Source:RGD Symbol;Acc:1310799]
ENSRNOG00000031003	102	0.267536	0.198781	1.34588	0.178341	0.319643	ENSRNOG00000031003	Zfp764	zinc finger protein 764 [Source:RGD Symbol;Acc:7540019]
ENSRNOG00000020652	148.482	-0.313122	0.190188	-1.64638	0.0996846	0.207369	ENSRNOG00000020652	Tgfb1	transforming growth factor, beta 1 [Source:RGD Symbol;Acc:69051]
ENSRNOG00000062473	58.507	-0.383779	0.290853	-1.31949	0.187004	0.330654	ENSRNOG00000062473	Bbc3	Bcl-2 binding component 3 [Source:RGD Symbol;Acc:631434]
ENSRNOG00000060972	1178.55	0.388925	0.0797368	4.8776	1.07382e-06	1.38196e-05	ENSRNOG00000060972	Heca	hdc homolog, cell cycle regulator [Source:RGD Symbol;Acc:1304818]
ENSRNOG00000011975	163.955	-0.0898681	0.174172	-0.515973	0.605873	0.739891	ENSRNOG00000011975	Crtc3	CREB regulated transcription coactivator 3 [Source:RGD Symbol;Acc:1309666]
ENSRNOG00000019132	308.545	0.134529	0.130613	1.02998	0.303018	0.463998	ENSRNOG00000019132	Fv1	Friend virus susceptibility 1 [Source:RGD Symbol;Acc:1309326]
ENSRNOG00000016368	302.901	-0.0191817	0.136915	-0.140099	0.888581	0.933931	ENSRNOG00000016368	Ppp1r14c	protein phosphatase 1, regulatory (inhibitor) subunit 14c [Source:RGD Symbol;Acc:620538]
ENSRNOG00000004273	23.8089	-0.548897	0.456087	-1.20349	0.228786	0.381752	ENSRNOG00000004273	Ifitm1	interferon induced transmembrane protein 1 [Source:RGD Symbol;Acc:1307601]
ENSRNOG00000021145	1679.86	-0.160088	0.0765825	-2.0904	0.0365816	0.09541	ENSRNOG00000021145	Gpr137	G protein-coupled receptor 137 [Source:RGD Symbol;Acc:1586317]
ENSRNOG00000054391	20024.3	-0.0363922	0.04737	-0.768255	0.442336	0.602156	ENSRNOG00000054391	Snrpn	small nuclear ribonucleoprotein polypeptide N [Source:RGD Symbol;Acc:621306]
ENSRNOG00000020731	7328.48	-0.41036	0.0487253	-8.4219	3.70418e-17	4.18772e-15	ENSRNOG00000020731	Ppfia3	PTPRF interacting protein alpha 3 [Source:RGD Symbol;Acc:620054]
ENSRNOG00000033343	31.9779	0.0151881	0.379043	0.0400696	0.968038	0.982681	ENSRNOG00000033343	Prss36	serine protease 36 [Source:RGD Symbol;Acc:1593186]
ENSRNOG00000019578	7954.49	-0.239885	0.0615621	-3.89663	9.75416e-05	0.000714997	ENSRNOG00000019578	Rps16	ribosomal protein S16 [Source:RGD Symbol;Acc:621031]
ENSRNOG00000017137	200.109	0.23118	0.151168	1.52929	0.126192	0.247452	ENSRNOG00000017137	Eef1akmt2	EEF1A lysine methyltransferase 2 [Source:RGD Symbol;Acc:1306300]
ENSRNOG00000020897	5402.13	-0.129141	0.0494629	-2.61086	0.00903159	0.0314171	ENSRNOG00000020897	Prpf19	pre-mRNA processing factor 19 [Source:RGD Symbol;Acc:708496]
ENSRNOG00000014186	205.613	-0.0280564	0.145416	-0.192939	0.847007	0.906793	ENSRNOG00000014186	Zswim9	zinc finger SWIM-type containing 9 [Source:RGD Symbol;Acc:1310257]
ENSRNOG00000012055	2806.4	-0.01735	0.0695415	-0.249492	0.80298	0.879368	ENSRNOG00000012055	Man2a2	mannosidase, alpha, class 2A, member 2 [Source:RGD Symbol;Acc:1310238]
ENSRNOG00000017753	392.608	0.0118887	0.105175	0.113037	0.910001	0.946968	ENSRNOG00000017753	Ercc2	ERCC excision repair 2, TFIIH core complex helicase subunit [Source:RGD Symbol;Acc:1309109]
ENSRNOG00000017975	233.887	-0.392412	0.154339	-2.54252	0.0110055	0.0368447	ENSRNOG00000017975	Dnajb13	DnaJ heat shock protein family (Hsp40) member B13 [Source:RGD Symbol;Acc:1359131]
ENSRNOG00000051915	594.227	0.128869	0.114854	1.12203	0.261849	0.418668	ENSRNOG00000051915	Spred3	sprouty-related, EVH1 domain containing 3 [Source:RGD Symbol;Acc:1311713]
ENSRNOG00000020746	1134.77	-0.227957	0.0762634	-2.98907	0.00279824	0.0120532	ENSRNOG00000020746	Lin7b	lin-7 homolog B, crumbs cell polarity complex component [Source:RGD Symbol;Acc:620730]
ENSRNOG00000011411	202.93	-0.0413845	0.197007	-0.210066	0.833616	0.898281	ENSRNOG00000011411	Adgrg6	adhesion G protein-coupled receptor G6 [Source:RGD Symbol;Acc:1308551]
ENSRNOG00000068342	292.789	-0.0260239	0.127119	-0.204721	0.83779	0.901127	ENSRNOG00000068342	Coa4	cytochrome c oxidase assembly factor 4 homolog [Source:RGD Symbol;Acc:1562228]
ENSRNOG00000026517	856.558	-0.170728	0.0723986	-2.35816	0.0183657	0.0554611	ENSRNOG00000026517	Vrk3	VRK serine/threonine kinase 3 [Source:RGD Symbol;Acc:1549692]
ENSRNOG00000020991	21.882	0.221049	0.399741	0.55298	0.580277	0.718781	ENSRNOG00000020991	Ms4a6a	membrane spanning 4-domains A6A [Source:RGD Symbol;Acc:1305800]
ENSRNOG00000021147	884.799	-0.171729	0.0816194	-2.10402	0.0353763	0.0929933	ENSRNOG00000021147	Bad	BCL2-associated agonist of cell death [Source:RGD Symbol;Acc:620103]
ENSRNOG00000018106	63.8507	0.232249	0.27294	0.850916	0.394816	0.557943	ENSRNOG00000018106	Neu3	neuraminidase 3 [Source:RGD Symbol;Acc:619881]
ENSRNOG00000017621	1492.94	0.258842	0.0740117	3.49731	0.000469982	0.00272909	ENSRNOG00000017621	Spns1	sphingolipid transporter 1 [Source:RGD Symbol;Acc:1305613]
ENSRNOG00000024056	323.905	0.201928	0.129487	1.55945	0.118889	0.237053	ENSRNOG00000024056	Zfp715	zinc finger protein 715 [Source:RGD Symbol;Acc:1624201]
ENSRNOG00000010964	596.871	0.0435049	0.0958541	0.453865	0.649926	0.772562	ENSRNOG00000010964	Akap13	A-kinase anchoring protein 13 [Source:RGD Symbol;Acc:727893]
ENSRNOG00000018411	460.721	0.0549583	0.0988041	0.556235	0.578051	0.716886	ENSRNOG00000018411	Pold3	DNA polymerase delta 3, accessory subunit [Source:RGD Symbol;Acc:1312027]
ENSRNOG00000014530	862.935	0.114534	0.0872343	1.31295	0.1892	0.333414	ENSRNOG00000014530	Nav2	neuron navigator 2 [Source:RGD Symbol;Acc:619778]
ENSRNOG00000011675	271.736	0.714136	0.15596	4.57897	4.67276e-06	5.00551e-05	ENSRNOG00000011675	Zfp40	zinc finger protein 40 [Source:RGD Symbol;Acc:1593410]
ENSRNOG00000017446	1251.67	-0.434162	0.0774486	-5.60581	2.07288e-08	4.0838e-07	ENSRNOG00000017446	Ndufs8	NADH:ubiquinone oxidoreductase core subunit S8 [Source:RGD Symbol;Acc:1309436]
ENSRNOG00000016244	12200.9	-0.207461	0.0508321	-4.08129	4.47862e-05	0.000365274	ENSRNOG00000016244	Mical2	microtubule associated monooxygenase, calponin and LIM domain containing 2 [Source:RGD Symbol;Acc:1311773]
ENSRNOG00000016815	1013.36	0.237789	0.0760256	3.12775	0.00176148	0.00818996	ENSRNOG00000016815	Tmem135	transmembrane protein 135 [Source:RGD Symbol;Acc:1309948]
ENSRNOG00000018936	275.875	0.341782	0.121938	2.80292	0.00506427	0.0196384	ENSRNOG00000018936	Zfp780b-ps1	zinc finger protein 780B, pseudogene 1 [Source:RGD Symbol;Acc:2321719]
ENSRNOG00000014193	303.198	-0.0404479	0.123261	-0.328149	0.742799	0.840216	ENSRNOG00000014193	Lig1	DNA ligase 1 [Source:RGD Symbol;Acc:621424]
ENSRNOG00000014908	641.777	-0.317625	0.0866773	-3.66445	0.000247867	0.00159215	ENSRNOG00000014908	Sf3b5	splicing factor 3b, subunit 5 [Source:RGD Symbol;Acc:1586993]
ENSRNOG00000064302	36.8789	0.0296396	0.346907	0.0854395	0.931912	0.960673	ENSRNOG00000064302
ENSRNOG00000018379	148.713	-0.0377988	0.164364	-0.22997	0.818115	0.88888	ENSRNOG00000018379	Zfp688	zinc finger protein 688 [Source:RGD Symbol;Acc:1310765]
ENSRNOG00000053084	249.364	-0.365399	0.130573	-2.79843	0.00513521	0.0198768	ENSRNOG00000053084	Fuz	fuzzy planar cell polarity protein [Source:RGD Symbol;Acc:1310608]
ENSRNOG00000012322	161.646	-0.0978054	0.153712	-0.636292	0.524586	0.67194	ENSRNOG00000012322	Pex7	peroxisomal biogenesis factor 7 [Source:RGD Symbol;Acc:1308483]
ENSRNOG00000019254	462.74	-0.177002	0.107862	-1.641	0.100797	0.209155	ENSRNOG00000019254	Dyrk1b	dual specificity tyrosine phosphorylation regulated kinase 1B [Source:RGD Symbol;Acc:1307223]
ENSRNOG00000017243	4081.7	0.339201	0.0594285	5.70771	1.14504e-08	2.35696e-07	ENSRNOG00000017243	Bnip3	BCL2 interacting protein 3 [Source:RGD Symbol;Acc:620800]
ENSRNOG00000011526	391.606	-0.0868437	0.133952	-0.648321	0.516777	0.665943	ENSRNOG00000011526	Pcsk6	proprotein convertase subtilisin/kexin type 6 [Source:RGD Symbol;Acc:3246]
ENSRNOG00000053366	168.908	0.0859091	0.161903	0.530622	0.595681	0.732368	ENSRNOG00000053366	Zfp59	zinc finger protein 59 [Source:RGD Symbol;Acc:1591403]
ENSRNOG00000011882	868.47	0.0885265	0.0752605	1.17627	0.239488	0.394354	ENSRNOG00000011882	Gab2	GRB2-associated binding protein 2 [Source:RGD Symbol;Acc:621367]
ENSRNOG00000018766	196.709	-0.13689	0.161633	-0.846918	0.397041	0.560114	ENSRNOG00000018766	Rrp8	ribosomal RNA processing 8 [Source:RGD Symbol;Acc:1308302]
ENSRNOG00000021103	5304.1	-0.261729	0.087048	-3.00672	0.00264083	0.0114837	ENSRNOG00000021103	Nrxn2	neurexin 2 [Source:RGD Symbol;Acc:620211]
ENSRNOG00000017050	75.4404	-0.0904426	0.245053	-0.369073	0.712073	0.817961	ENSRNOG00000017050	Lmntd2	lamin tail domain containing 2 [Source:RGD Symbol;Acc:1307439]
ENSRNOG00000046727	60.8891	0.00373113	0.239284	0.0155929	0.987559	0.99361	ENSRNOG00000046727	Abcc2	ATP binding cassette subfamily C member 2 [Source:RGD Symbol;Acc:2366]
ENSRNOG00000049517	281.978	0.0220624	0.145532	0.151599	0.879504	0.927856	ENSRNOG00000049517	Tnfaip3	TNF alpha induced protein 3 [Source:RGD Symbol;Acc:1589275]
ENSRNOG00000017512	1130.74	-0.277465	0.0943262	-2.94155	0.00326579	0.0137765	ENSRNOG00000017512	Aldh3b1	aldehyde dehydrogenase 3 family, member B1 [Source:RGD Symbol;Acc:1359546]
ENSRNOG00000037580	1866.66	-0.240413	0.0698383	-3.44243	0.000576515	0.00323769	ENSRNOG00000037580	Psmd8	proteasome 26S subunit, non-ATPase 8 [Source:RGD Symbol;Acc:1309842]
ENSRNOG00000012074	952.876	-0.449311	0.100002	-4.49303	7.02163e-06	7.16645e-05	ENSRNOG00000012074	Ifngr1	interferon gamma receptor 1 [Source:RGD Symbol;Acc:620570]
ENSRNOG00000017012	384.293	-0.412022	0.136318	-3.02251	0.00250689	0.0109981	ENSRNOG00000017012	Coq7	coenzyme Q7, hydroxylase [Source:RGD Symbol;Acc:2381]
ENSRNOG00000068955	2434.52	-0.421893	0.0678118	-6.22154	4.92302e-10	1.38079e-08	ENSRNOG00000068955	Rps13	ribosomal protein S13 [Source:RGD Symbol;Acc:621027]
ENSRNOG00000019730	1090.78	-0.310883	0.0706415	-4.40085	1.07829e-05	0.000104055	ENSRNOG00000019730	Inppl1	inositol polyphosphate phosphatase-like 1 [Source:RGD Symbol;Acc:68396]
ENSRNOG00000019776	943.832	0.0932792	0.0862439	1.08157	0.279441	0.437655	ENSRNOG00000019776	Sh3gl3	SH3 domain containing GRB2 like 3, endophilin A3 [Source:RGD Symbol;Acc:620578]
ENSRNOG00000014030	882.035	-0.0414706	0.136153	-0.304587	0.76068	0.852382	ENSRNOG00000014030	Synm	synemin [Source:RGD Symbol;Acc:727872]
ENSRNOG00000049944	4927.51	-0.0301366	0.0746066	-0.40394	0.686257	0.799328	ENSRNOG00000049944	Slc25a22	solute carrier family 25 member 22 [Source:RGD Symbol;Acc:1307826]
ENSRNOG00000023968	29.4255	0.0478401	0.350938	0.136321	0.891568	0.935735	ENSRNOG00000023968	Fancf	FA complementation group F [Source:RGD Symbol;Acc:1561456]
ENSRNOG00000026243	4063.71	-0.248343	0.0777082	-3.19585	0.00139421	0.00679175	ENSRNOG00000026243	Ap2a1	adaptor related protein complex 2 subunit alpha 1 [Source:RGD Symbol;Acc:1306254]
ENSRNOG00000066277	398.864	-0.0648073	0.117725	-0.550498	0.581978	0.720341	ENSRNOG00000066277	Zfp689	zinc finger protein 689 [Source:RGD Symbol;Acc:628696]
ENSRNOG00000016717	125.719	0.29623	0.193597	1.53013	0.125984	0.247141	ENSRNOG00000016717	Gas2	growth arrest-specific 2 [Source:RGD Symbol;Acc:1563167]
ENSRNOG00000055371	3123.04	-0.21455	0.0884447	-2.42581	0.0152743	0.0477529	ENSRNOG00000055371	Sptbn4	spectrin, beta, non-erythrocytic 4 [Source:RGD Symbol;Acc:1304682]
ENSRNOG00000020533	3795.9	-0.502034	0.14616	-3.43483	0.000592927	0.00330621	ENSRNOG00000020533	Htra1	HtrA serine peptidase 1 [Source:RGD Symbol;Acc:69235]
ENSRNOG00000059224	873.764	-0.00587871	0.0696495	-0.0844042	0.932735	0.961184	ENSRNOG00000059224	Reps1	RALBP1 associated Eps domain containing 1 [Source:RGD Symbol;Acc:1307131]
ENSRNOG00000018960	11859.3	0.155755	0.0789193	1.9736	0.0484274	0.118373	ENSRNOG00000018960	Syne1	spectrin repeat containing nuclear envelope protein 1 [Source:RGD Symbol;Acc:620546]
ENSRNOG00000037080	69.9486	0.122731	0.280416	0.437675	0.661622	0.781221	ENSRNOG00000037080	Adamts17	ADAM metallopeptidase with thrombospondin type 1 motif, 17 [Source:RGD Symbol;Acc:1308783]
ENSRNOG00000050453	230.092	0.141076	0.128034	1.10187	0.270519	0.427796	ENSRNOG00000050453	Fbxo27	F-box protein 27 [Source:RGD Symbol;Acc:1563982]
ENSRNOG00000014061	107.172	-0.048834	0.293137	-0.166591	0.867692	0.92013	ENSRNOG00000014061	Dusp5	dual specificity phosphatase 5 [Source:RGD Symbol;Acc:620854]
ENSRNOG00000018873	4852.09	-0.000314046	0.0489644	-0.00641377	0.994883	0.99787	ENSRNOG00000018873	Fam168a	family with sequence similarity 168, member A [Source:RGD Symbol;Acc:1308929]
ENSRNOG00000042776	95.2278	0.143435	0.250627	0.572303	0.567117	0.707964	ENSRNOG00000042776	Lins1	lines homolog 1 [Source:RGD Symbol;Acc:1308792]
ENSRNOG00000021004	390.674	-0.19266	0.118894	-1.62043	0.105139	0.215814	ENSRNOG00000021004	Rasip1	Ras interacting protein 1 [Source:RGD Symbol;Acc:1305291]
ENSRNOG00000063590	292.196	0.0644162	0.134748	0.47805	0.632614	0.760544	ENSRNOG00000063590	Fzd4	frizzled class receptor 4 [Source:RGD Symbol;Acc:71017]
ENSRNOG00000018994	1653.64	-0.32444	0.0732533	-4.42901	9.46664e-06	9.3189e-05	ENSRNOG00000018994	Psmc4	proteasome 26S subunit, ATPase 4 [Source:RGD Symbol;Acc:621102]
ENSRNOG00000017703	185.536	-0.0666584	0.151318	-0.440517	0.659562	0.779729	ENSRNOG00000017703	Unc93b1	unc-93 homolog B1, TLR signaling regulator [Source:RGD Symbol;Acc:1311984]
ENSRNOG00000019746	1226.88	-0.165432	0.074596	-2.21771	0.0265749	0.0743663	ENSRNOG00000019746	Paf1	PAF1 homolog, Paf1/RNA polymerase II complex component [Source:RGD Symbol;Acc:1306219]
ENSRNOG00000013836	266.403	-0.231295	0.145027	-1.59484	0.110748	0.22466	ENSRNOG00000013836	Arhgap17	Rho GTPase activating protein 17 [Source:RGD Symbol;Acc:628767]
ENSRNOG00000011945	1783.82	0.166572	0.0611023	2.72612	0.00640843	0.0238322	ENSRNOG00000011945	Cyfip1	cytoplasmic FMR1 interacting protein 1 [Source:RGD Symbol;Acc:1310332]
ENSRNOG00000029366	5720.32	0.0392734	0.0700789	0.560417	0.575195	0.714654	ENSRNOG00000029366	Prrt2	proline-rich transmembrane protein 2 [Source:RGD Symbol;Acc:1564195]
ENSRNOG00000058388	142.145	-0.158162	0.225209	-0.702288	0.4825	0.636676	ENSRNOG00000058388	Zfp36	zinc finger protein 36 [Source:RGD Symbol;Acc:620722]
ENSRNOG00000020848	864.272	-0.124774	0.0784466	-1.59056	0.11171	0.225992	ENSRNOG00000020848	Coq8b	coenzyme Q8B [Source:RGD Symbol;Acc:1311356]
ENSRNOG00000018518	483.375	-0.173267	0.0939912	-1.84344	0.065265	0.149431	ENSRNOG00000018518	Prr14	proline rich 14 [Source:RGD Symbol;Acc:1594592]
ENSRNOG00000019702	491.126	-0.0449423	0.0967617	-0.464464	0.642315	0.766995	ENSRNOG00000019702	Med29	mediator complex subunit 29 [Source:RGD Symbol;Acc:1311009]
ENSRNOG00000012690	657.023	0.37542	0.096584	3.88698	0.000101501	0.000739227	ENSRNOG00000012690	Nipa2	NIPA magnesium transporter 2 [Source:RGD Symbol;Acc:1306051]
ENSRNOG00000017097	1136.03	-0.334778	0.065471	-5.11338	3.16441e-07	4.68352e-06	ENSRNOG00000017097	Lhpp	phospholysine phosphohistidine inorganic pyrophosphate phosphatase [Source:RGD Symbol;Acc:1359187]
ENSRNOG00000018850	634.089	-0.370237	0.137091	-2.70066	0.00692027	0.0253951	ENSRNOG00000018850	Ttc9b	tetratricopeptide repeat domain 9B [Source:RGD Symbol;Acc:1306256]
ENSRNOG00000020486	33.441	-0.301808	0.329838	-0.915019	0.360182	0.522875	ENSRNOG00000020486	Bcl2l12	Bcl2 like 12 [Source:RGD Symbol;Acc:1307361]
ENSRNOG00000060599	1515.16	0.327868	0.122868	2.66846	0.00761991	0.0274216	ENSRNOG00000060599	Gabrb3	gamma-aminobutyric acid type A receptor subunit beta 3 [Source:RGD Symbol;Acc:2651]
ENSRNOG00000042702	2689.03	0.570514	0.0790409	7.21796	5.27741e-13	2.88335e-11	ENSRNOG00000042702	Nipa1	NIPA magnesium transporter 1 [Source:RGD Symbol;Acc:1305401]
ENSRNOG00000019949	298.286	-0.401691	0.134855	-2.97869	0.00289487	0.0124149	ENSRNOG00000019949	Mrps12	mitochondrial ribosomal protein S12 [Source:RGD Symbol;Acc:1306221]
ENSRNOG00000025126	58.9434	-0.26876	0.247364	-1.0865	0.277258	0.435253	ENSRNOG00000025126	Palb2	partner and localizer of BRCA2 [Source:RGD Symbol;Acc:1304759]
ENSRNOG00000020867	1684.55	-0.282596	0.0786802	-3.59171	0.000328514	0.00202609	ENSRNOG00000020867	Numbl	NUMB-like, endocytic adaptor protein [Source:RGD Symbol;Acc:1307579]
ENSRNOG00000015807	227.795	-0.199298	0.145443	-1.37028	0.170598	0.309126	ENSRNOG00000015807	Pyroxd2	pyridine nucleotide-disulphide oxidoreductase domain 2 [Source:RGD Symbol;Acc:1303232]
ENSRNOG00000025651	544.239	0.539553	0.0884574	6.09958	1.06349e-09	2.80614e-08	ENSRNOG00000025651	Ikzf5	IKAROS family zinc finger 5 [Source:RGD Symbol;Acc:1310965]
ENSRNOG00000011282	9952.41	-0.175649	0.0538766	-3.26022	0.00111327	0.0056168	ENSRNOG00000011282	Ppp2r1a	protein phosphatase 2 scaffold subunit A alpha [Source:RGD Symbol;Acc:620907]
ENSRNOG00000019962	276.65	-0.16863	0.134588	-1.25293	0.21023	0.359548	ENSRNOG00000019962	Sars2	seryl-tRNA synthetase 2, mitochondrial [Source:RGD Symbol;Acc:1309456]
ENSRNOG00000023521	5187.54	-0.675248	0.0737096	-9.16092	5.14566e-20	8.59383e-18	ENSRNOG00000023521	Map3k10	mitogen activated protein kinase kinase kinase 10 [Source:RGD Symbol;Acc:1308381]
ENSRNOG00000055028	932.879	-0.0133387	0.0779831	-0.171045	0.864188	0.917899	ENSRNOG00000055028	Setd1a	SET domain containing 1A, histone lysine methyltransferase [Source:RGD Symbol;Acc:1311624]
ENSRNOG00000015560	1004.91	0.116948	0.0753112	1.55286	0.120456	0.239559	ENSRNOG00000015560	Emsy	EMSY transcriptional repressor, BRCA2 interacting [Source:RGD Symbol;Acc:1310712]
ENSRNOG00000032723	279.334	0.0479248	0.118122	0.405722	0.684947	0.798329	ENSRNOG00000032723	Efl1	elongation factor like GTPase 1 [Source:RGD Symbol;Acc:1306521]
ENSRNOG00000043388	578.37	0.775344	0.127899	6.06215	1.34314e-09	3.48765e-08	ENSRNOG00000043388	Irf3	interferon regulatory factor 3 [Source:RGD Symbol;Acc:1549774]
ENSRNOG00000042728	1000.12	-0.154987	0.083509	-1.85594	0.0634626	0.14617	ENSRNOG00000042728	Fbrs	fibrosin [Source:RGD Symbol;Acc:1594591]
ENSRNOG00000011460	2000.5	0.829522	0.161065	5.15023	2.60167e-07	3.93787e-06	ENSRNOG00000011460	Arfgef3	ARFGEF family member 3 [Source:RGD Symbol;Acc:1309903]
ENSRNOG00000013009	7847.3	-0.0963347	0.0744778	-1.29347	0.195849	0.341852	ENSRNOG00000013009	Ldha	lactate dehydrogenase A [Source:RGD Symbol;Acc:2996]
ENSRNOG00000020615	2968.5	-0.0761272	0.0610447	-1.24707	0.212371	0.362173	ENSRNOG00000020615	Nap1l4	nucleosome assembly protein 1-like 4 [Source:RGD Symbol;Acc:1305391]
ENSRNOG00000017109	130.999	-0.320528	0.179727	-1.78342	0.0745178	0.165862	ENSRNOG00000017109	Rassf7	Ras association domain family member 7 [Source:RGD Symbol;Acc:1306244]
ENSRNOG00000021117	1213.18	-0.372638	0.0856074	-4.35287	1.34369e-05	0.000126835	ENSRNOG00000021117	Rps6ka4	ribosomal protein S6 kinase A4 [Source:RGD Symbol;Acc:1307277]
ENSRNOG00000020130	873.47	0.0600473	0.0821231	0.731186	0.464666	0.620723	ENSRNOG00000020130	Arhgef1	Rho guanine nucleotide exchange factor 1 [Source:RGD Symbol;Acc:620951]
ENSRNOG00000019529	5244.73	0.12372	0.0584877	2.11532	0.0344031	0.0908412	ENSRNOG00000019529	Btbd1	BTB domain containing 1 [Source:RGD Symbol;Acc:1310962]
ENSRNOG00000010803	1409.27	0.101087	0.0966515	1.04589	0.295613	0.45582	ENSRNOG00000010803	Gabra5	gamma-aminobutyric acid type A receptor subunit alpha 5 [Source:RGD Symbol;Acc:61859]
ENSRNOG00000016374	2086.71	0.00562524	0.072569	0.0775156	0.938213	0.964165	ENSRNOG00000016374	Fgfr2	fibroblast growth factor receptor 2 [Source:RGD Symbol;Acc:2611]
ENSRNOG00000026114	214.194	-0.051718	0.160585	-0.32206	0.747407	0.843739	ENSRNOG00000026114	Ap5b1	adaptor related protein complex 5 subunit beta 1 [Source:RGD Symbol;Acc:1562657]
ENSRNOG00000020557	345.936	0.712336	0.139995	5.08828	3.61329e-07	5.2671e-06	ENSRNOG00000020557	Ryr1	ryanodine receptor 1 [Source:RGD Symbol;Acc:1586637]
ENSRNOG00000056946	3302.75	-0.524535	0.0807474	-6.496	8.24829e-11	2.79321e-09	ENSRNOG00000056946	Scaf1	SR-related CTD-associated factor 1 [Source:RGD Symbol;Acc:708405]
ENSRNOG00000058030	277.918	0.315777	0.121271	2.60389	0.00921716	0.0319492	ENSRNOG00000058030	Zfp748-ps1	zinc finger protein 748, pseudogene 1 [Source:RGD Symbol;Acc:1585783]
ENSRNOG00000011313	980.98	0.240664	0.0848755	2.83549	0.00457556	0.0181161	ENSRNOG00000011313	Sorcs1	sortilin-related VPS10 domain containing receptor 1 [Source:RGD Symbol;Acc:1305910]
ENSRNOG00000049179	97.313	0.159318	0.202085	0.788372	0.430479	0.591672	ENSRNOG00000049179	Pidd1	p53-induced death domain protein 1 [Source:RGD Symbol;Acc:1311792]
ENSRNOG00000032246	30.1287	0.310965	0.405068	0.767686	0.442674	0.602238	ENSRNOG00000032246	Acsm3	acyl-CoA synthetase medium-chain family member 3 [Source:RGD Symbol;Acc:62086]
ENSRNOG00000020660	19333.5	-0.190833	0.0451284	-4.22866	2.35086e-05	0.000207511	ENSRNOG00000020660	Cfl1	cofilin 1 [Source:RGD Symbol;Acc:69285]
ENSRNOG00000025075	105.192	0.365832	0.204323	1.79046	0.0733797	0.16395	ENSRNOG00000025075	Relt	RELT, TNF receptor [Source:RGD Symbol;Acc:1305381]
ENSRNOG00000019426	431.31	0.148745	0.136091	1.09298	0.274402	0.432296	ENSRNOG00000019426	Ramac	RNA guanine-7 methyltransferase activating subunit [Source:RGD Symbol;Acc:1310022]
ENSRNOG00000013718	4700.15	0.378079	0.0705719	5.35736	8.44481e-08	1.45502e-06	ENSRNOG00000013718	Herc2	HECT and RLD domain containing E3 ubiquitin protein ligase 2 [Source:RGD Symbol;Acc:1307989]
ENSRNOG00000037247	272.164	-0.357132	0.131746	-2.71077	0.0067128	0.0247449	ENSRNOG00000037247	Rras	RAS related [Source:RGD Symbol;Acc:1311443]
ENSRNOG00000065597	40.0935	0.0741083	0.336255	0.220394	0.825565	0.892642	ENSRNOG00000065597
ENSRNOG00000052273	513.472	-0.211178	0.106508	-1.98274	0.0473966	0.116331	ENSRNOG00000052273	C1h15orf40	similar to human chromosome 15 open reading frame 40 [Source:RGD Symbol;Acc:1305713]
ENSRNOG00000013969	1776.51	0.517524	0.10015	5.16747	2.37279e-07	3.63259e-06	ENSRNOG00000013969	Ahi1	Abelson helper integration site 1 [Source:RGD Symbol;Acc:1303040]
ENSRNOG00000018462	234.444	-0.294263	0.151601	-1.94104	0.0522538	0.12565	ENSRNOG00000018462	Rabep2	rabaptin, RAB GTPase binding effector protein 2 [Source:RGD Symbol;Acc:621416]
ENSRNOG00000016429	1807.01	0.464818	0.121989	3.81032	0.000138785	0.000965777	ENSRNOG00000016429	Grm5	glutamate metabotropic receptor 5 [Source:RGD Symbol;Acc:2746]
ENSRNOG00000012366	1457.41	-0.0372705	0.0692301	-0.538357	0.590331	0.727904	ENSRNOG00000012366	Mesd	mesoderm development LRP chaperone [Source:RGD Symbol;Acc:1310344]
ENSRNOG00000019080	193.491	0.111361	0.159943	0.696254	0.48627	0.639812	ENSRNOG00000019080	Hsd3b7	hydroxy-delta-5-steroid dehydrogenase, 3 beta- and steroid delta-isomerase 7 [Source:RGD Symbol;Acc:628727]
ENSRNOG00000059492	270.447	0.410295	0.136691	3.00162	0.0026855	0.0116393	ENSRNOG00000059492	LOC100365363	vomeronasal 1 receptor, F4-like [Source:RGD Symbol;Acc:2319215]
ENSRNOG00000020489	907.863	0.299788	0.103819	2.8876	0.00388199	0.0158531	ENSRNOG00000020489	Tmem145	transmembrane protein 145 [Source:RGD Symbol;Acc:1595911]
ENSRNOG00000018993	1645.47	-0.11319	0.0646328	-1.75128	0.0798985	0.175159	ENSRNOG00000018993	Ilk	integrin-linked kinase [Source:RGD Symbol;Acc:620063]
ENSRNOG00000018916	292.307	-0.0987793	0.117117	-0.843422	0.398992	0.561733	ENSRNOG00000018916	Bcl7c	BAF chromatin remodeling complex subunit BCL7C [Source:RGD Symbol;Acc:1308439]
ENSRNOG00000066224	55.5807	0.744487	0.301981	2.46535	0.0136881	0.0437144	ENSRNOG00000066224	LOC102548728	zinc finger protein 845-like [Source:RGD Symbol;Acc:7537348]
ENSRNOG00000014673	147.14	-0.117174	0.169399	-0.691707	0.489121	0.642721	ENSRNOG00000014673	Eri2	ERI1 exoribonuclease family member 2 [Source:RGD Symbol;Acc:1583889]
ENSRNOG00000016206	887.313	-0.200571	0.0821708	-2.44091	0.0146503	0.0462547	ENSRNOG00000016206	Uvrag	UV radiation resistance associated [Source:RGD Symbol;Acc:1589754]
ENSRNOG00000016210	44.3008	0.0871686	0.339891	0.25646	0.797595	0.875907	ENSRNOG00000016210	Mical2	microtubule associated monooxygenase, calponin and LIM domain containing 2 [Source:RGD Symbol;Acc:1311773]
ENSRNOG00000019145	1919.86	0.0781661	0.0704351	1.10976	0.267102	0.424251	ENSRNOG00000019145	Kdm2a	lysine demethylase 2A [Source:RGD Symbol;Acc:1309419]
ENSRNOG00000019674	376.36	-0.164027	0.103894	-1.5788	0.114383	0.230128	ENSRNOG00000019674	Mfsd13a	major facilitator superfamily domain containing 13A [Source:RGD Symbol;Acc:1309313]
ENSRNOG00000020617	267.722	0.0330958	0.14577	0.227042	0.820391	0.890164	ENSRNOG00000020617	Mus81	MUS81 structure-specific endonuclease subunit [Source:RGD Symbol;Acc:1311957]
ENSRNOG00000017021	494.134	-0.245341	0.10726	-2.28735	0.0221752	0.0642944	ENSRNOG00000017021	Galnt18	polypeptide N-acetylgalactosaminyltransferase 18 [Source:RGD Symbol;Acc:1309623]
ENSRNOG00000011932	379.787	-0.104759	0.11664	-0.898141	0.36911	0.532691	ENSRNOG00000011932	Snrpa1	small nuclear ribonucleoprotein polypeptide A' [Source:RGD Symbol;Acc:2320494]
ENSRNOG00000013436	252.942	0.220521	0.20171	1.09326	0.274281	0.432197	ENSRNOG00000013436	Pde7b	phosphodiesterase 7B [Source:RGD Symbol;Acc:621016]
ENSRNOG00000065747	23.4843	1.71675	0.480763	3.57088	0.000355782	0.00215982	ENSRNOG00000065747
ENSRNOG00000013381	1934.53	-0.000304149	0.063184	-0.0048137	0.996159	0.998333	ENSRNOG00000013381	Tsg101	tumor susceptibility 101 [Source:RGD Symbol;Acc:3909]
ENSRNOG00000020479	844.691	0.640737	0.105862	6.05258	1.42546e-09	3.68837e-08	ENSRNOG00000020479	Pik3c2a	phosphatidylinositol-4-phosphate 3-kinase, catalytic subunit type 2 alpha [Source:RGD Symbol;Acc:1310389]
ENSRNOG00000036859	528.981	-0.45037	0.107813	-4.17733	2.94954e-05	0.000253357	ENSRNOG00000036859	Gdpd5	glycerophosphodiester phosphodiesterase domain containing 5 [Source:RGD Symbol;Acc:1559673]
ENSRNOG00000019883	161.697	-0.387235	0.155488	-2.49045	0.0127581	0.0413737	ENSRNOG00000019883	Pak4	p21 (RAC1) activated kinase 4 [Source:RGD Symbol;Acc:1307705]
ENSRNOG00000016683	72.6807	-0.225521	0.252918	-0.891677	0.372566	0.535847	ENSRNOG00000016683	Zfp668	zinc finger protein 668 [Source:RGD Symbol;Acc:1308623]
ENSRNOG00000051867	29.5817	0.82507	0.406746	2.02847	0.0425128	0.107319	ENSRNOG00000051867	Zfp758	zinc finger protein 600 [Source:RGD Symbol;Acc:9286049]
ENSRNOG00000045741	44.5334	0.434528	0.366593	1.18531	0.235894	0.390288	ENSRNOG00000045741	AABR07071891.2
ENSRNOG00000057384	176.855	-0.208749	0.151927	-1.37401	0.16944	0.307752	ENSRNOG00000057384	Nfatc2ip	nuclear factor of activated T-cells 2 interacting protein [Source:RGD Symbol;Acc:1359096]
ENSRNOG00000011308	1035.02	0.0814854	0.0713125	1.14265	0.253183	0.409084	ENSRNOG00000011308	Uhrf2	ubiquitin like with PHD and ring finger domains 2 [Source:RGD Symbol;Acc:1309990]
ENSRNOG00000030266	171.044	-0.593227	0.151901	-3.90534	9.40913e-05	0.00069185	ENSRNOG00000030266	Plekhg2	pleckstrin homology and RhoGEF domain containing G2 [Source:RGD Symbol;Acc:1310112]
ENSRNOG00000021140	1544.41	0.091493	0.0695319	1.31584	0.188228	0.332218	ENSRNOG00000021140	Kcnk4	potassium two pore domain channel subfamily K member 4 [Source:RGD Symbol;Acc:621449]
ENSRNOG00000016573	751.877	-0.317018	0.108636	-2.91818	0.00352078	0.0146186	ENSRNOG00000016573	Dgat2	diacylglycerol O-acyltransferase 2 [Source:RGD Symbol;Acc:620329]
ENSRNOG00000051578	128.913	0.698038	0.208087	3.35456	0.000794918	0.00423294	ENSRNOG00000051578	Zfp54	zinc finger protein 54 [Source:RGD Symbol;Acc:1307738]
ENSRNOG00000025167	575.309	-0.307146	0.116528	-2.63582	0.00839338	0.0296106	ENSRNOG00000025167	Sema4b	semaphorin 4B [Source:RGD Symbol;Acc:1307872]
ENSRNOG00000066618	159.529	0.316978	0.182479	1.73706	0.0823758	0.179227	ENSRNOG00000066618	Sfxn2	sideroflexin 2 [Source:RGD Symbol;Acc:1306131]
ENSRNOG00000020495	1672.62	-0.228702	0.0724946	-3.15474	0.00160641	0.00761346	ENSRNOG00000020495	Eif3k	eukaryotic translation initiation factor 3, subunit K [Source:RGD Symbol;Acc:1309221]
ENSRNOG00000060206	814.782	0.00506497	0.0784998	0.0645221	0.948555	0.971289	ENSRNOG00000060206	Zfp592	zinc finger protein 592 [Source:RGD Symbol;Acc:1308705]
ENSRNOG00000020596	1125.14	-0.149777	0.100787	-1.48607	0.13726	0.262904	ENSRNOG00000020596	Dmac2	distal membrane arm assembly component 2 [Source:RGD Symbol;Acc:1549698]
ENSRNOG00000056036	123.457	0.718047	0.242841	2.95687	0.00310784	0.0132279	ENSRNOG00000056036	Zfp51	zinc finger protein 51 [Source:RGD Symbol;Acc:9163837]
ENSRNOG00000055531	242.356	0.083379	0.133135	0.626275	0.531135	0.678259	ENSRNOG00000055531	Hps5	serum amyloid A4 [Source:RGD Symbol;Acc:1307371]
ENSRNOG00000045838	187.912	-0.0408961	0.175502	-0.233024	0.815743	0.88748	ENSRNOG00000045838	Hps1	HPS1, biogenesis of lysosomal organelles complex 3 subunit 1 [Source:RGD Symbol;Acc:69193]
ENSRNOG00000020904	470.97	-0.198552	0.111245	-1.78482	0.074291	0.165433	ENSRNOG00000020904	Cdc42ep2	CDC42 effector protein 2 [Source:RGD Symbol;Acc:1310253]
ENSRNOG00000020271	1300.68	0.428241	0.0767063	5.58286	2.36589e-08	4.5994e-07	ENSRNOG00000020271	Tial1	Tia1 cytotoxic granule-associated RNA binding protein-like 1 [Source:RGD Symbol;Acc:1595845]
ENSRNOG00000032668	123.406	0.986439	0.214007	4.60938	4.03877e-06	4.41716e-05	ENSRNOG00000032668	LOC102550291	zinc finger protein 658-like [Source:RGD Symbol;Acc:7570552]
ENSRNOG00000028113	191.173	-0.163633	0.140238	-1.16683	0.243281	0.398606	ENSRNOG00000028113	Whamm	WASP homolog associated with actin, golgi membranes and microtubules [Source:RGD Symbol;Acc:1563506]
ENSRNOG00000012067	459.631	-0.499969	0.796968	-0.62734	0.530437	0.67778	ENSRNOG00000012067	Fam111a	FAM111 trypsin like peptidase A [Source:RGD Symbol;Acc:1560913]
ENSRNOG00000026115	321.381	0.12678	0.110916	1.14302	0.253029	0.408973	ENSRNOG00000026115	Zfp646	zinc finger protein 646 [Source:RGD Symbol;Acc:1561579]
ENSRNOG00000042347	55.6758	0.222548	0.259426	0.85785	0.390975	0.553601	ENSRNOG00000042347	Zfp53	zinc finger protein 53 [Source:RGD Symbol;Acc:1308573]
ENSRNOG00000026857	105.127	-0.601497	0.230661	-2.6077	0.00911519	0.031663	ENSRNOG00000026857	Kif7	kinesin family member 7 [Source:RGD Symbol;Acc:1310310]
ENSRNOG00000020607	306.456	-0.438438	0.12611	-3.47663	0.000507757	0.00291049	ENSRNOG00000020607	Bckdha	branched chain keto acid dehydrogenase E1 subunit alpha [Source:RGD Symbol;Acc:2196]
ENSRNOG00000013057	29.0556	-0.268524	0.437068	-0.614375	0.538967	0.685307	ENSRNOG00000013057	Prc1	protein regulator of cytokinesis 1 [Source:RGD Symbol;Acc:1311754]
ENSRNOG00000019861	3775.08	0.0354909	0.0532128	0.666962	0.504797	0.656084	ENSRNOG00000019861	Tollip	toll interacting protein [Source:RGD Symbol;Acc:1304676]
ENSRNOG00000013194	1620.25	0.0742686	0.104868	0.708211	0.478814	0.633405	ENSRNOG00000013194	Rps6ka2	ribosomal protein S6 kinase A2 [Source:RGD Symbol;Acc:620676]
ENSRNOG00000020906	50.4777	-0.775774	0.273126	-2.84035	0.00450637	0.0178807	ENSRNOG00000020906	Pola2	DNA polymerase alpha 2, accessory subunit [Source:RGD Symbol;Acc:621817]
ENSRNOG00000012360	961.102	-0.102539	0.0771979	-1.32826	0.184091	0.3268	ENSRNOG00000012360	Gtf2h1	general transcription factor IIH subunit 1 [Source:RGD Symbol;Acc:1308225]
ENSRNOG00000023496	1808.39	-0.131799	0.0671549	-1.96261	0.0496912	0.120633	ENSRNOG00000023496	Entrep2	endosomal transmembrane epsin interactor 2 [Source:RGD Symbol;Acc:1592985]
ENSRNOG00000019178	659.04	-0.213505	0.0863471	-2.47264	0.0134118	0.0430395	ENSRNOG00000019178	Taf10	TATA-box binding protein associated factor 10 [Source:RGD Symbol;Acc:1305907]
ENSRNOG00000014373	728.993	0.181603	0.101095	1.79637	0.0724355	0.162195	ENSRNOG00000014373	Trim66	tripartite motif-containing 66 [Source:RGD Symbol;Acc:1595847]
ENSRNOG00000014187	269.331	0.646747	0.165074	3.91793	8.9312e-05	0.000661356	ENSRNOG00000014187	Igf1r	insulin-like growth factor 1 receptor [Source:RGD Symbol;Acc:2869]
ENSRNOG00000016498	964.851	0.0803247	0.0841858	0.954136	0.340015	0.502745	ENSRNOG00000016498	AABR07004112.1
ENSRNOG00000061795	486.53	0.0314804	0.100237	0.314061	0.753475	0.847843	ENSRNOG00000061795	Rbm4b	RNA binding motif protein 4B [Source:RGD Symbol;Acc:1359343]
ENSRNOG00000019212	1865.09	-0.0402025	0.0632616	-0.635497	0.525104	0.672545	ENSRNOG00000019212	Tpp1	tripeptidyl peptidase 1 [Source:RGD Symbol;Acc:621296]
ENSRNOG00000020635	264.108	-0.207859	0.157463	-1.32005	0.186819	0.33049	ENSRNOG00000020635	Exosc5	exosome component 5 [Source:RGD Symbol;Acc:1307861]
ENSRNOG00000017120	1535.4	0.00203688	0.100921	0.0201828	0.983898	0.991317	ENSRNOG00000017120	Abhd2	abhydrolase domain containing 2, acylglycerol lipase [Source:RGD Symbol;Acc:1311389]
ENSRNOG00000020369	327.041	-1.80372	0.35712	-5.05073	4.4013e-07	6.22143e-06	ENSRNOG00000020369	Igf2	insulin-like growth factor 2 [Source:RGD Symbol;Acc:2870]
ENSRNOG00000042059	90.2772	-0.188103	0.203897	-0.922537	0.356249	0.518859	ENSRNOG00000042059	Rccd1	RCC1 domain containing 1 [Source:RGD Symbol;Acc:1309901]
ENSRNOG00000026040	115.04	0.481639	0.179557	2.68237	0.00731019	0.0265279	ENSRNOG00000026040	Prss53	serine protease 53 [Source:RGD Symbol;Acc:1566127]
ENSRNOG00000012683	489.277	-0.0812337	0.0883715	-0.91923	0.357975	0.520411	ENSRNOG00000012683	Abhd17c	abhydrolase domain containing 17C, depalmitoylase [Source:RGD Symbol;Acc:1308210]
ENSRNOG00000068180	197.198	0.442514	0.154138	2.8709	0.0040931	0.0165583	ENSRNOG00000068180	Tmem91	transmembrane protein 91 [Source:RGD Symbol;Acc:2323264]
ENSRNOG00000022822	80.7646	0.0535062	0.30188	0.177243	0.859317	0.9148	ENSRNOG00000022822	Fam169b	family with sequence similarity 169, member B [Source:RGD Symbol;Acc:1585883]
ENSRNOG00000014565	1047.15	-0.154156	0.0730316	-2.11081	0.0347889	0.0917116	ENSRNOG00000014565	Lcmt1	leucine carboxyl methyltransferase 1 [Source:RGD Symbol;Acc:735118]
ENSRNOG00000019193	12227	-0.0288294	0.0436977	-0.659747	0.509416	0.659696	ENSRNOG00000019193	Stx1b	syntaxin 1B [Source:RGD Symbol;Acc:3784]
ENSRNOG00000024363	188.885	-0.28828	0.247258	-1.16591	0.243652	0.398903	ENSRNOG00000024363	Sertad1	SERTA domain containing 1 [Source:RGD Symbol;Acc:1549778]
ENSRNOG00000060707	1185.93	-0.0804438	0.0727852	-1.10522	0.269064	0.426422	ENSRNOG00000060707	Atg2a	autophagy related 2A [Source:RGD Symbol;Acc:1589890]
ENSRNOG00000012357	1405.48	-0.124321	0.0667137	-1.86351	0.0623912	0.14429	ENSRNOG00000012357	Unc45a	unc-45 myosin chaperone A [Source:RGD Symbol;Acc:1305357]
ENSRNOG00000016978	24.1661	0.0564036	0.413147	0.136522	0.891409	0.935721	ENSRNOG00000016978	C1h16orf54	similar to human chromosome 16 open reading frame 54 [Source:RGD Symbol;Acc:1564503]
ENSRNOG00000011659	107.077	0.216401	0.199529	1.08456	0.278118	0.435906	ENSRNOG00000011659	Alpk3	alpha-kinase 3 [Source:RGD Symbol;Acc:1309860]
ENSRNOG00000018928	82.4976	0.478489	0.223152	2.14423	0.0320145	0.0861279	ENSRNOG00000018928	LOC102553760	zinc finger protein 59-like [Source:RGD Symbol;Acc:7588314]
ENSRNOG00000011599	789.84	-0.242738	0.111811	-2.17096	0.0299342	0.0816372	ENSRNOG00000011599	Gldc	glycine decarboxylase [Source:RGD Symbol;Acc:1308660]
ENSRNOG00000050282	2282.95	0.0696848	0.0609691	1.14295	0.253058	0.408973	ENSRNOG00000050282	Srcap	Snf2-related CREBBP activator protein [Source:RGD Symbol;Acc:1565642]
ENSRNOG00000024245	63.3858	0.738499	0.279608	2.64119	0.00826146	0.0292646	ENSRNOG00000024245	Zkscan2	zinc finger with KRAB and SCAN domains 2 [Source:RGD Symbol;Acc:1359568]
ENSRNOG00000020835	1049.25	-0.249009	0.0863952	-2.8822	0.00394903	0.0160906	ENSRNOG00000020835	Hipk4	homeodomain interacting protein kinase 4 [Source:RGD Symbol;Acc:1307541]
ENSRNOG00000043007	209.042	-0.350329	0.136393	-2.56852	0.0102134	0.0347146	ENSRNOG00000043007	Rcn3	reticulocalbin 3 [Source:RGD Symbol;Acc:1359365]
ENSRNOG00000012442	317.847	0.487737	0.125344	3.8912	9.9748e-05	0.000728627	ENSRNOG00000012442	Cemip	cell migration inducing hyaluronidase 1 [Source:RGD Symbol;Acc:1305254]
ENSRNOG00000014513	23.7914	0.0730444	0.405723	0.180035	0.857125	0.913434	ENSRNOG00000014513	Rexo5	RNA exonuclease 5 [Source:RGD Symbol;Acc:1305412]
ENSRNOG00000018158	1201.5	0.256769	0.0809015	3.17385	0.00150431	0.0071852	ENSRNOG00000018158	Tmem181	transmembrane protein 181 [Source:RGD Symbol;Acc:1566403]
ENSRNOG00000021106	1533.31	-0.00414354	0.0771396	-0.0537148	0.957162	0.976503	ENSRNOG00000021106	Gramd1a	GRAM domain containing 1A [Source:RGD Symbol;Acc:1311022]
ENSRNOG00000015540	1714.92	0.0849543	0.0570226	1.48983	0.136268	0.261453	ENSRNOG00000015540	Ppp6r3	protein phosphatase 6, regulatory subunit 3 [Source:RGD Symbol;Acc:1307145]
ENSRNOG00000021108	40.6489	-0.490504	0.321357	-1.52635	0.126922	0.248618	ENSRNOG00000021108	Slc22a12	solute carrier family 22 member 12 [Source:RGD Symbol;Acc:621628]
ENSRNOG00000050104	11227.1	-0.151133	0.0463485	-3.2608	0.001111	0.00560727	ENSRNOG00000050104	Clip3	CAP-GLY domain containing linker protein 3 [Source:RGD Symbol;Acc:1306245]
ENSRNOG00000018390	8158.4	-0.244376	0.0697188	-3.50517	0.000456322	0.00266239	ENSRNOG00000018390	Pld3	phospholipase D family, member 3 [Source:RGD Symbol;Acc:1308248]
ENSRNOG00000021484	143.645	-0.114371	0.185504	-0.616545	0.537535	0.684351	ENSRNOG00000021484	Rhoq-ps1	ras homolog family member Q, pseudogene 1 [Source:RGD Symbol;Acc:6491275]
ENSRNOG00000018683	882.055	-0.206679	0.106399	-1.94249	0.0520782	0.125351	ENSRNOG00000018683	Dock1	dedicator of cyto-kinesis 1 [Source:RGD Symbol;Acc:1566072]
ENSRNOG00000020583	568.459	-0.308515	0.12097	-2.55034	0.0107618	0.0361607	ENSRNOG00000020583	Fcgrt	Fc gamma receptor and transporter [Source:RGD Symbol;Acc:61811]
ENSRNOG00000050828	193.988	0.33126	0.139816	2.36925	0.017824	0.0542022	ENSRNOG00000050828	Vkorc1	vitamin K epoxide reductase complex, subunit 1 [Source:RGD Symbol;Acc:1303107]
ENSRNOG00000018385	1777.96	-0.291193	0.0815154	-3.57224	0.000353939	0.00215117	ENSRNOG00000018385	Chrm1	cholinergic receptor, muscarinic 1 [Source:RGD Symbol;Acc:2342]
ENSRNOG00000025216	306.689	-0.111372	0.126859	-0.877918	0.379988	0.543204	ENSRNOG00000025216	Alkbh6	alkB homolog 6 [Source:RGD Symbol;Acc:1566318]
ENSRNOG00000026408	168.782	0.0427825	0.186099	0.229891	0.818177	0.88888	ENSRNOG00000026408	Rnf169	ring finger protein 169 [Source:RGD Symbol;Acc:1583288]
ENSRNOG00000015518	225.873	-0.404907	0.142111	-2.84924	0.00438244	0.0174775	ENSRNOG00000015518	Rbp4	retinol binding protein 4 [Source:RGD Symbol;Acc:3546]
ENSRNOG00000023274	422.915	-0.203978	0.122597	-1.66382	0.0961488	0.201842	ENSRNOG00000023274	Lrrc28	leucine rich repeat containing 28 [Source:RGD Symbol;Acc:1307209]
ENSRNOG00000019666	1596.8	-0.339199	0.059769	-5.67516	1.3856e-08	2.80884e-07	ENSRNOG00000019666	Ubxn1	UBX domain protein 1 [Source:RGD Symbol;Acc:1309471]
ENSRNOG00000049277	29.3227	-0.0465531	0.35462	-0.131276	0.895557	0.938583	ENSRNOG00000049277	Syne4	spectrin repeat containing nuclear envelope family member 4 [Source:RGD Symbol;Acc:1304580]
ENSRNOG00000020527	1318.49	-0.196779	0.0594785	-3.3084	0.000938302	0.00486256	ENSRNOG00000020527	Drap1	Dr1 associated protein 1 [Source:RGD Symbol;Acc:1308477]
ENSRNOG00000018207	131.806	-0.457478	0.168006	-2.72298	0.00646958	0.024011	ENSRNOG00000018207	Dynlt1	dynein light chain Tctex-type 1 [Source:RGD Symbol;Acc:620261]
ENSRNOG00000033881	174.74	0.0922752	0.1589	0.580713	0.561434	0.703005	ENSRNOG00000033881	Insyn2a	inhibitory synaptic factor 2A [Source:RGD Symbol;Acc:2302685]
ENSRNOG00000016358	3006.64	-0.1939	0.0749246	-2.58794	0.00965513	0.0331468	ENSRNOG00000016358	Apba2	amyloid beta precursor protein binding family A member 2 [Source:RGD Symbol;Acc:620845]
ENSRNOG00000026527	854.434	0.0848582	0.0744536	1.13975	0.254392	0.410451	ENSRNOG00000026527	Snx32	sorting nexin 32 [Source:RGD Symbol;Acc:1560591]
ENSRNOG00000019725	5947.54	-0.165629	0.0457754	-3.61829	0.00029656	0.00185312	ENSRNOG00000019725	Actr1a	actin related protein 1A [Source:RGD Symbol;Acc:1307025]
ENSRNOG00000019982	289.028	-0.143962	0.121464	-1.18522	0.235929	0.390303	ENSRNOG00000019982	Ethe1	ETHE1, persulfide dioxygenase [Source:RGD Symbol;Acc:1311034]
ENSRNOG00000045568	594.332	0.0728913	0.0930097	0.783695	0.433219	0.59441	ENSRNOG00000045568	Rbm14	RNA binding motif protein 14 [Source:RGD Symbol;Acc:620542]
ENSRNOG00000016728	1563.38	-0.216763	0.0704418	-3.0772	0.00208958	0.00946107	ENSRNOG00000016728	Tiam2	TIAM Rac1 associated GEF 2 [Source:RGD Symbol;Acc:2324148]
ENSRNOG00000036649	218.011	-0.26026	0.181692	-1.43242	0.152023	0.283611	ENSRNOG00000036649	Pwwp2b	PWWP domain containing 2B [Source:RGD Symbol;Acc:1307108]
ENSRNOG00000045561	272.736	-0.171187	0.116405	-1.47062	0.141393	0.269108	ENSRNOG00000045561	Uqcc3	ubiquinol-cytochrome c reductase complex assembly factor 3 [Source:RGD Symbol;Acc:1597344]
ENSRNOG00000020595	4921.4	-0.233349	0.0715429	-3.26167	0.00110758	0.00559255	ENSRNOG00000020595	Rps11	ribosomal protein S11 [Source:RGD Symbol;Acc:621026]
ENSRNOG00000018674	859.984	0.340469	0.0924233	3.6838	0.000229785	0.00149896	ENSRNOG00000018674	Ntrk3	neurotrophic receptor tyrosine kinase 3 [Source:RGD Symbol;Acc:3214]
ENSRNOG00000020389	88.4471	0.272717	0.219844	1.2405	0.214791	0.364943	ENSRNOG00000020389	Capn12	calpain 12 [Source:RGD Symbol;Acc:1307341]
ENSRNOG00000018322	3827.87	0.239905	0.0531802	4.51117	6.44699e-06	6.65389e-05	ENSRNOG00000018322	Picalm	phosphatidylinositol binding clathrin assembly protein [Source:RGD Symbol;Acc:621054]
ENSRNOG00000019851	64.2938	-0.820721	0.26157	-3.13767	0.00170297	0.00796657	ENSRNOG00000019851	Cox6a2	cytochrome c oxidase subunit 6A2 [Source:RGD Symbol;Acc:2385]
ENSRNOG00000019920	485.8	-0.0781332	0.133988	-0.583135	0.559802	0.701878	ENSRNOG00000019920	Doc2a	double C2 domain alpha [Source:RGD Symbol;Acc:620518]
ENSRNOG00000020839	269.601	-0.522384	0.151326	-3.45204	0.000556364	0.00314616	ENSRNOG00000020839	Lrfn3	leucine rich repeat and fibronectin type III domain containing 3 [Source:RGD Symbol;Acc:1305567]
ENSRNOG00000064232	100.955	0.0801452	0.201731	0.397287	0.691156	0.802554	ENSRNOG00000064232	LOC103691238	zinc finger protein 239-like [Source:RGD Symbol;Acc:9074604]
ENSRNOG00000050180	363.401	-0.0768285	0.105033	-0.731467	0.464494	0.620611	ENSRNOG00000050180	Zfpl1	zinc finger protein-like 1 [Source:RGD Symbol;Acc:1586738]
ENSRNOG00000019675	50.0265	-0.789945	0.289139	-2.73206	0.00629405	0.0235079	ENSRNOG00000019675	Pycard	PYD and CARD domain containing [Source:RGD Symbol;Acc:628637]
ENSRNOG00000020551	1136.91	-0.183784	0.0689226	-2.66653	0.00766397	0.0275464	ENSRNOG00000020551	Bles03	basophilic leukemia expressed protein BLES03 [Source:RGD Symbol;Acc:628612]
ENSRNOG00000047756	1154.28	0.423009	0.110102	3.84199	0.00012204	0.000869421	ENSRNOG00000047756	Mef2a	myocyte enhancer factor 2a [Source:RGD Symbol;Acc:1359360]
ENSRNOG00000066875	259.992	0.189566	0.136009	1.39377	0.163386	0.299375	ENSRNOG00000066875	Dcun1d3	defective in cullin neddylation 1 domain containing 3 [Source:RGD Symbol;Acc:1308893]
ENSRNOG00000018962	33.6234	0.483038	0.325371	1.48458	0.137656	0.263497	ENSRNOG00000018962	Ctf1	cardiotrophin 1 [Source:RGD Symbol;Acc:2442]
ENSRNOG00000014486	201.73	0.449667	0.215101	2.09049	0.0365734	0.0954064	ENSRNOG00000014486	Rfx3	regulatory factor X3 [Source:RGD Symbol;Acc:1307779]
ENSRNOG00000024793	339.483	-0.17924	0.112839	-1.58846	0.112183	0.22682	ENSRNOG00000024793	Kctd21	potassium channel tetramerization domain containing 21 [Source:RGD Symbol;Acc:1559529]
ENSRNOG00000056223	286.167	0.0521157	0.127431	0.408971	0.682561	0.796728	ENSRNOG00000056223	Tfb1m	transcription factor B1, mitochondrial [Source:RGD Symbol;Acc:727795]
ENSRNOG00000012292	123.201	0.0919933	0.2178	0.422375	0.672752	0.789542	ENSRNOG00000012292	Alg8	ALG8, alpha-1,3-glucosyltransferase [Source:RGD Symbol;Acc:1305468]
ENSRNOG00000020433	4111.96	-0.146344	0.0598343	-2.44582	0.0144523	0.0457279	ENSRNOG00000020433	Actn4	actinin alpha 4 [Source:RGD Symbol;Acc:61816]
ENSRNOG00000020618	8556.67	-0.46865	0.0648415	-7.22762	4.91532e-13	2.69554e-11	ENSRNOG00000020618	Rpl13a	ribosomal protein L13A [Source:RGD Symbol;Acc:628697]
ENSRNOG00000012698	446.437	0.0828314	0.105984	0.781549	0.43448	0.595403	ENSRNOG00000012698	Chsy1	chondroitin sulfate synthase 1 [Source:RGD Symbol;Acc:1311904]
ENSRNOG00000010775	130.885	0.283617	0.197455	1.43636	0.1509	0.281837	ENSRNOG00000010775	Arrdc4	arrestin domain containing 4 [Source:RGD Symbol;Acc:1311763]
ENSRNOG00000019935	597.491	-0.173878	0.107418	-1.6187	0.105513	0.216339	ENSRNOG00000019935	Armc5	armadillo repeat containing 5 [Source:RGD Symbol;Acc:1306553]
ENSRNOG00000012383	1587.07	-0.00562043	0.07124	-0.0788944	0.937117	0.96347	ENSRNOG00000012383	Ndufc2	NADH:ubiquinone oxidoreductase subunit C2 [Source:RGD Symbol;Acc:1307511]
ENSRNOG00000019960	1056.65	-0.18718	0.0860582	-2.17503	0.0296276	0.0809062	ENSRNOG00000019960	Ino80e	INO80 complex subunit E [Source:RGD Symbol;Acc:1359572]
ENSRNOG00000012404	1100.13	-0.564223	0.128068	-4.40566	1.05462e-05	0.000102174	ENSRNOG00000012404	Thrsp	thyroid hormone responsive [Source:RGD Symbol;Acc:3859]
ENSRNOG00000064709	22.3923	-0.162972	0.409988	-0.397504	0.690996	0.802431	ENSRNOG00000064709
ENSRNOG00000046333	4732.53	0.177524	0.0607125	2.92401	0.00345549	0.014399	ENSRNOG00000046333	Ablim1	actin-binding LIM protein 1 [Source:RGD Symbol;Acc:1565768]
ENSRNOG00000019461	111.303	0.321089	0.193252	1.6615	0.0966122	0.202497	ENSRNOG00000019461	Zbtb3	zinc finger and BTB domain containing 3 [Source:RGD Symbol;Acc:1561140]
ENSRNOG00000012494	70.5527	-0.543207	0.22616	-2.40186	0.0163117	0.050449	ENSRNOG00000012494	Kctd14	potassium channel tetramerization domain containing 14 [Source:RGD Symbol;Acc:1306430]
ENSRNOG00000050624	607.887	0.226968	0.0990817	2.29071	0.0219801	0.0639179	ENSRNOG00000050624	Lysmd4	LysM domain containing 4 [Source:RGD Symbol;Acc:1592887]
ENSRNOG00000016751	927.369	0.068266	0.0859515	0.794238	0.427057	0.588951	ENSRNOG00000016751	Slc25a28	solute carrier family 25 member 28 [Source:RGD Symbol;Acc:1584155]
ENSRNOG00000019077	1023.52	0.0997971	0.0723492	1.37938	0.167777	0.305478	ENSRNOG00000019077	Lipa	lipase A, lysosomal acid type [Source:RGD Symbol;Acc:3008]
ENSRNOG00000014862	74.8919	0.782779	0.239325	3.27078	0.00107252	0.00543357	ENSRNOG00000014862	Gabrg3	gamma-aminobutyric acid type A receptor subunit gamma 3 [Source:RGD Symbol;Acc:621735]
ENSRNOG00000013017	3270.41	0.0137806	0.0534817	0.25767	0.796662	0.875405	ENSRNOG00000013017	Arnt2	aryl hydrocarbon receptor nuclear translocator 2 [Source:RGD Symbol;Acc:2154]
ENSRNOG00000036604	216.716	0.158679	0.203594	0.779386	0.435752	0.596299	ENSRNOG00000036604	Ifit2	interferon-induced protein with tetratricopeptide repeats 2 [Source:RGD Symbol;Acc:1307804]
ENSRNOG00000019439	838.137	-0.0483657	0.0923491	-0.523726	0.600469	0.735792	ENSRNOG00000019439	Polr2g	RNA polymerase II subunit G [Source:RGD Symbol;Acc:621284]
ENSRNOG00000017195	1377.39	0.0101502	0.0628427	0.161517	0.871686	0.922871	ENSRNOG00000017195	Ctr9	CTR9 homolog, Paf1/RNA polymerase II complex component [Source:RGD Symbol;Acc:1311097]
ENSRNOG00000016603	2513.3	-0.38555	0.0551497	-6.99097	2.73e-12	1.30269e-10	ENSRNOG00000016603	Rtn2	reticulon 2 [Source:RGD Symbol;Acc:1303245]
ENSRNOG00000065273	445.26	0.219059	0.125636	1.74361	0.0812277	0.177385	ENSRNOG00000065273	LOC103691165	uncharacterized LOC103691165 [Source:RGD Symbol;Acc:9322177]
ENSRNOG00000018987	871.42	0.786919	0.0802535	9.80541	1.06709e-22	2.61385e-20	ENSRNOG00000018987	Crebzf	CREB/ATF bZIP transcription factor [Source:RGD Symbol;Acc:1565584]
ENSRNOG00000027374	50.6967	-0.042786	0.299287	-0.14296	0.886322	0.932579	ENSRNOG00000027374	Cfap46	cilia and flagella associated protein 46 [Source:RGD Symbol;Acc:1559985]
ENSRNOG00000022748	44.6814	0.0112337	0.298049	0.0376906	0.969934	0.983582	ENSRNOG00000022748	Tmem126a	transmembrane protein 126A [Source:RGD Symbol;Acc:1305677]
ENSRNOG00000016689	125.686	0.392373	0.180389	2.17515	0.029619	0.0808977	ENSRNOG00000016689	Fanci	FA complementation group I [Source:RGD Symbol;Acc:2321863]
ENSRNOG00000018929	28.4324	-0.21244	0.389565	-0.545326	0.585529	0.723214	ENSRNOG00000018929	Kif20b	kinesin family member 20B [Source:RGD Symbol;Acc:1308497]
ENSRNOG00000020623	371.59	-0.128487	0.118217	-1.08688	0.277091	0.435107	ENSRNOG00000020623	Aldh16a1	aldehyde dehydrogenase 16 family, member A1 [Source:RGD Symbol;Acc:1566295]
ENSRNOG00000018487	3008.39	-0.281695	0.0651198	-4.3258	1.51982e-05	0.000141553	ENSRNOG00000018487	Slc3a2	solute carrier family 3 member 2 [Source:RGD Symbol;Acc:3073]
ENSRNOG00000019701	213.845	-0.159051	0.150367	-1.05775	0.290168	0.449473	ENSRNOG00000019701	C1h11orf98	similar to human chromosome 11 open reading frame 98 [Source:RGD Symbol;Acc:1597339]
ENSRNOG00000022386	2354.92	-0.215995	0.120168	-1.79744	0.0722656	0.161928	ENSRNOG00000022386	Opalin	oligodendrocytic myelin paranodal and inner loop protein [Source:RGD Symbol;Acc:1307776]
ENSRNOG00000033733	136.496	-0.059371	0.175998	-0.33734	0.735861	0.835018	ENSRNOG00000033733	Ccdc81	coiled-coil domain containing 81 [Source:RGD Symbol;Acc:1306766]
ENSRNOG00000026005	484.769	-0.289009	0.107381	-2.69143	0.00711463	0.0259721	ENSRNOG00000026005	Ints5	integrator complex subunit 5 [Source:RGD Symbol;Acc:1309370]
ENSRNOG00000032293	742.968	-0.111722	0.0925007	-1.2078	0.227126	0.379714	ENSRNOG00000032293	Polg	DNA polymerase gamma, catalytic subunit [Source:RGD Symbol;Acc:620057]
ENSRNOG00000020354	451.871	-0.296321	0.102348	-2.89523	0.00378882	0.0155456	ENSRNOG00000020354	Mrpl23	mitochondrial ribosomal protein L23 [Source:RGD Symbol;Acc:68343]
ENSRNOG00000024530	350.68	0.103349	0.130103	0.79436	0.426986	0.588909	ENSRNOG00000024530	Lyrm1	LYR motif containing 1 [Source:RGD Symbol;Acc:1563498]
ENSRNOG00000015003	302.049	-0.138442	0.157929	-0.876605	0.380701	0.543695	ENSRNOG00000015003	Pex11a	peroxisomal biogenesis factor 11 alpha [Source:RGD Symbol;Acc:619842]
ENSRNOG00000018725	1045.3	-0.213942	0.0856728	-2.4972	0.012518	0.0407479	ENSRNOG00000018725	Phkg2	phosphorylase kinase catalytic subunit gamma 2 [Source:RGD Symbol;Acc:620024]
ENSRNOG00000055401	2037.04	0.269531	0.086231	3.12569	0.0017739	0.00823998	ENSRNOG00000055401	Kcnc1	potassium voltage-gated channel subfamily C member 1 [Source:RGD Symbol;Acc:2955]
ENSRNOG00000054955	1080.17	0.000409089	0.131378	0.00311384	0.997516	0.998971	ENSRNOG00000054955	Adgra1	adhesion G protein-coupled receptor A1 [Source:RGD Symbol;Acc:1308241]
ENSRNOG00000017118	127.748	-0.00421522	0.203993	-0.0206636	0.983514	0.991096	ENSRNOG00000017118	P4ha3	prolyl 4-hydroxylase subunit alpha 3 [Source:RGD Symbol;Acc:735150]
ENSRNOG00000070964	95.8099	0.153283	0.202016	0.75877	0.44799	0.606212	ENSRNOG00000070964	Cc2d2b	coiled-coil and C2 domain containing 2B [Source:RGD Symbol;Acc:1310408]
ENSRNOG00000033744	103.174	0.521407	0.239231	2.17951	0.0292938	0.0801884	ENSRNOG00000033744	Rasgrp4	RAS guanyl releasing protein 4 [Source:RGD Symbol;Acc:620476]
ENSRNOG00000014783	166.725	-0.221255	0.196312	-1.12706	0.259719	0.416258	ENSRNOG00000014783	Pgghg	protein-glucosylgalactosylhydroxylysine glucosidase [Source:RGD Symbol;Acc:1306015]
ENSRNOG00000020634	138.711	0.155624	0.171644	0.906667	0.364583	0.527316	ENSRNOG00000020634	Pih1d1	PIH1 domain containing 1 [Source:RGD Symbol;Acc:1309809]
ENSRNOG00000019724	3033.25	-0.206953	0.0494453	-4.18548	2.84559e-05	0.00024601	ENSRNOG00000019724	Ganab	glucosidase II alpha subunit [Source:RGD Symbol;Acc:1309775]
ENSRNOG00000016496	117.413	0.0983152	0.207963	0.472754	0.636389	0.76295	ENSRNOG00000016496	Ctsc	cathepsin C [Source:RGD Symbol;Acc:2445]
ENSRNOG00000048733	612.953	-0.17177	0.101013	-1.70048	0.0890413	0.190403	ENSRNOG00000048733	Nup62	nucleoporin 62 [Source:RGD Symbol;Acc:619938]
ENSRNOG00000022839	91.2727	0.641335	0.48832	1.31335	0.189066	0.333297	ENSRNOG00000022839	Ifit3	interferon-induced protein with tetratricopeptide repeats 3 [Source:RGD Symbol;Acc:1359681]
ENSRNOG00000025142	274.335	0.310954	0.170983	1.81862	0.0689687	0.156071	ENSRNOG00000025142	Mex3b	mex-3 RNA binding family member B [Source:RGD Symbol;Acc:1306790]
ENSRNOG00000067262	873.343	-0.0698016	0.0795652	-0.877289	0.38033	0.543376	ENSRNOG00000067262	Aldh18a1	aldehyde dehydrogenase 18 family, member A1 [Source:RGD Symbol;Acc:1311431]
ENSRNOG00000025052	79.0853	0.234031	0.248433	0.94203	0.346177	0.509388	ENSRNOG00000025052	Stard5	StAR-related lipid transfer domain containing 5 [Source:RGD Symbol;Acc:1561783]
ENSRNOG00000017842	26.2187	-0.257235	0.393499	-0.653713	0.513296	0.663027	ENSRNOG00000017842	Scnn1g	sodium channel epithelial 1 subunit gamma [Source:RGD Symbol;Acc:3641]
ENSRNOG00000020726	279.843	-0.331374	0.141712	-2.33837	0.0193683	0.0578687	ENSRNOG00000020726	Sipa1	signal-induced proliferation-associated 1 [Source:RGD Symbol;Acc:1303184]
ENSRNOG00000053015	84.1452	0.253284	0.213952	1.18384	0.236477	0.390824	ENSRNOG00000053015	Cfap119	cilia and flagella associated protein 119 [Source:RGD Symbol;Acc:1593368]
ENSRNOG00000020650	31342.3	-0.213086	0.060619	-3.51517	0.000439469	0.00258355	ENSRNOG00000020650	Slc17a7	solute carrier family 17 member 7 [Source:RGD Symbol;Acc:620101]
ENSRNOG00000019245	253.271	0.0352315	0.136467	0.258168	0.796277	0.875244	ENSRNOG00000019245	Sgf29	SAGA complex associated factor 29 [Source:RGD Symbol;Acc:1310609]
ENSRNOG00000011680	96.7791	-0.144087	0.208825	-0.689991	0.4902	0.643543	ENSRNOG00000011680	Il16	interleukin 16 [Source:RGD Symbol;Acc:1583872]
ENSRNOG00000036603	56.1258	-0.446743	0.262995	-1.69868	0.0893797	0.190859	ENSRNOG00000036603	Ifit1bl	interferon-induced protein with tetratricopeptide repeats 1B-like [Source:RGD Symbol;Acc:1304872]
ENSRNOG00000020430	1183.75	0.0497339	0.0672048	0.740035	0.459279	0.615972	ENSRNOG00000020430	Wdr11	WD repeat domain 11 [Source:RGD Symbol;Acc:1587347]
ENSRNOG00000017619	562.996	-0.330732	0.139706	-2.36734	0.0179165	0.0544046	ENSRNOG00000017619	Aldh1a1	aldehyde dehydrogenase 1 family, member A1 [Source:RGD Symbol;Acc:2087]
ENSRNOG00000018163	3467.86	0.281529	0.0660635	4.26149	2.03064e-05	0.00018287	ENSRNOG00000018163	Ipcef1	interaction protein for cytohesin exchange factors 1 [Source:RGD Symbol;Acc:735159]
ENSRNOG00000017850	112.773	-0.0130202	0.185287	-0.0702704	0.943978	0.967952	ENSRNOG00000017850	Dctpp1	dCTP pyrophosphatase 1 [Source:RGD Symbol;Acc:620933]
ENSRNOG00000064037	30.1878	-0.147083	0.346974	-0.423901	0.671638	0.788773	ENSRNOG00000064037	Hpse2	heparanase 2 (inactive) [Source:RGD Symbol;Acc:1307959]
ENSRNOG00000015078	152.736	-0.412889	0.216481	-1.90728	0.0564843	0.133766	ENSRNOG00000015078	Ifitm3	interferon induced transmembrane protein 3 [Source:RGD Symbol;Acc:1595844]
ENSRNOG00000020505	117.337	-0.280658	0.201812	-1.39069	0.164319	0.300671	ENSRNOG00000020505	Map4k1	mitogen activated protein kinase kinase kinase kinase 1 [Source:RGD Symbol;Acc:1305463]
ENSRNOG00000014936	142.86	-0.889276	0.209367	-4.24745	2.16215e-05	0.000192854	ENSRNOG00000014936	Ifitm2	interferon induced transmembrane protein 2 [Source:RGD Symbol;Acc:69332]
ENSRNOG00000018052	216.957	-0.501961	0.170025	-2.95228	0.00315437	0.0134065	ENSRNOG00000018052	Cnksr3	Cnksr family member 3 [Source:RGD Symbol;Acc:1307544]
ENSRNOG00000019050	91.2015	2.67223	1.14629	2.33119	0.0197434	0.0587205	ENSRNOG00000019050	Ifit1	interferon-induced protein with tetratricopeptide repeats 1 [Source:RGD Symbol;Acc:620599]
ENSRNOG00000022321	37.8443	0.0528174	0.341772	0.15454	0.877184	0.926813	ENSRNOG00000022321	Hapln3	hyaluronan and proteoglycan link protein 3 [Source:RGD Symbol;Acc:1308098]
ENSRNOG00000020191	955.13	-0.145755	0.090107	-1.61757	0.105755	0.216684	ENSRNOG00000020191	Tbc1d17	TBC1 domain family, member 17 [Source:RGD Symbol;Acc:1309686]
ENSRNOG00000036645	21.8631	-0.0940214	0.413863	-0.22718	0.820284	0.890164	ENSRNOG00000036645	Ifitm6	interferon induced transmembrane protein 6 [Source:RGD Symbol;Acc:1304718]
ENSRNOG00000018042	1688.92	-0.137237	0.0687995	-1.99474	0.0460708	0.113914	ENSRNOG00000018042	Mrpl48	mitochondrial ribosomal protein L48 [Source:RGD Symbol;Acc:1307576]
ENSRNOG00000020903	430.997	0.0751603	0.100448	0.748254	0.454307	0.611835	ENSRNOG00000020903	Lto1	LTO1 maturation factor of ABCE1 [Source:RGD Symbol;Acc:1304637]
ENSRNOG00000018840	568.323	-0.231893	0.114748	-2.02089	0.0432911	0.108835	ENSRNOG00000018840	Rnf40	ring finger protein 40 [Source:RGD Symbol;Acc:628638]
ENSRNOG00000018391	263.147	-0.138748	0.139371	-0.995535	0.319476	0.481277	ENSRNOG00000018391	Cdk2ap2	cyclin-dependent kinase 2 associated protein 2 [Source:RGD Symbol;Acc:1588883]
ENSRNOG00000020289	859.872	-0.23424	0.0790203	-2.9643	0.00303368	0.012961	ENSRNOG00000020289	Akt1s1	AKT1 substrate 1 [Source:RGD Symbol;Acc:1312049]
ENSRNOG00000017227	6005.55	-0.0950521	0.0713562	-1.33208	0.182834	0.325513	ENSRNOG00000017227	Ppme1	protein phosphatase methylesterase 1 [Source:RGD Symbol;Acc:1309683]
ENSRNOG00000020851	24325.9	-0.247007	0.0445371	-5.54609	2.92128e-08	5.55421e-07	ENSRNOG00000020851	Aplp1	amyloid beta precursor like protein 1 [Source:RGD Symbol;Acc:69257]
ENSRNOG00000011068	226.601	-0.122967	0.164837	-0.745991	0.455673	0.612944	ENSRNOG00000011068	Papss2	3'-phosphoadenosine 5'-phosphosulfate synthase 2 [Source:RGD Symbol;Acc:1307012]
ENSRNOG00000043141	1172.56	-0.11579	0.0664359	-1.74288	0.0813541	0.177579	ENSRNOG00000043141	Ap3s2	adaptor related protein complex 3 subunit sigma 2 [Source:RGD Symbol;Acc:1586888]
ENSRNOG00000015088	1644.91	0.238247	0.0989437	2.40791	0.0160442	0.0497893	ENSRNOG00000015088	Prune2	prune homolog 2 with BCH domain [Source:RGD Symbol;Acc:1311350]
ENSRNOG00000064647	1366.79	-0.242956	0.0863146	-2.81478	0.0048811	0.0190741	ENSRNOG00000064647	Echs1	enoyl-CoA hydratase, short chain 1 [Source:RGD Symbol;Acc:69330]
ENSRNOG00000017114	1817.01	0.236732	0.110586	2.14071	0.0322977	0.086652	ENSRNOG00000017114	Synj2	synaptojanin 2 [Source:RGD Symbol;Acc:69436]
ENSRNOG00000060008	708.065	-0.178545	0.0872805	-2.04565	0.0407909	0.1039	ENSRNOG00000060008	Cog7	component of oligomeric golgi complex 7 [Source:RGD Symbol;Acc:1566058]
ENSRNOG00000018176	14203.6	0.351363	0.0484931	7.24562	4.30462e-13	2.38736e-11	ENSRNOG00000018176	Rab6a	RAB6A, member RAS oncogene family [Source:RGD Symbol;Acc:619737]
ENSRNOG00000060693	177.751	0.475849	0.175685	2.70854	0.00675796	0.0248615	ENSRNOG00000060693	Catsperg	cation channel sperm associated auxiliary subunit gamma [Source:RGD Symbol;Acc:1310942]
ENSRNOG00000051256	219.309	-0.0809844	0.132913	-0.609305	0.542322	0.688086	ENSRNOG00000051256	R3hcc1l	R3H domain and coiled-coil containing 1-like [Source:RGD Symbol;Acc:1307934]
ENSRNOG00000027228	34.7319	0.272261	0.324428	0.839205	0.401354	0.563704	ENSRNOG00000027228	Mogat2	monoacylglycerol O-acyltransferase 2 [Source:RGD Symbol;Acc:1598060]
ENSRNOG00000029061	540.572	-0.104017	0.110904	-0.937903	0.348295	0.511232	ENSRNOG00000029061	Hirip3	HIRA interacting protein 3 [Source:RGD Symbol;Acc:1306463]
ENSRNOG00000018838	463.667	-0.324811	0.116634	-2.78488	0.00535479	0.0205804	ENSRNOG00000018838	Paox	polyamine oxidase [Source:RGD Symbol;Acc:1561125]
ENSRNOG00000017222	667.695	-0.0443588	0.0954494	-0.464736	0.64212	0.766995	ENSRNOG00000017222	Abraxas2	abraxas 2, BRISC complex subunit [Source:RGD Symbol;Acc:1308918]
ENSRNOG00000020918	347.364	-0.478434	0.155386	-3.079	0.00207699	0.00940986	ENSRNOG00000020918	Ccnd1	cyclin D1 [Source:RGD Symbol;Acc:68384]
ENSRNOG00000017889	425.212	0.1017	0.104517	0.973051	0.330528	0.493425	ENSRNOG00000017889	Serac1	serine active site containing 1 [Source:RGD Symbol;Acc:1565064]
ENSRNOG00000014589	183.852	0.228586	0.179321	1.27474	0.202403	0.350049	ENSRNOG00000014589	Arpin	actin-related protein 2/3 complex inhibitor [Source:RGD Symbol;Acc:1311021]
ENSRNOG00000017608	708.554	0.0735633	0.0873356	0.842306	0.399617	0.562207	ENSRNOG00000017608	C2cd3	C2 domain containing 3 centriole elongation regulator [Source:RGD Symbol;Acc:1307366]
ENSRNOG00000020864	38.2848	0.0680915	0.340665	0.199878	0.841576	0.903624	ENSRNOG00000020864	Kirrel2	kirre like nephrin family adhesion molecule 2 [Source:RGD Symbol;Acc:1308456]
ENSRNOG00000023360	3130.32	-0.0920774	0.057447	-1.60282	0.108974	0.221796	ENSRNOG00000023360	Fus	Fus RNA binding protein [Source:RGD Symbol;Acc:1308864]
ENSRNOG00000068667	52.6998	0.848425	0.315625	2.68808	0.0071865	0.0261565	ENSRNOG00000068667
ENSRNOG00000019873	4789.13	-0.232709	0.0467938	-4.97308	6.58979e-07	8.99259e-06	ENSRNOG00000019873	B3gat3	beta-1,3-glucuronyltransferase 3 [Source:RGD Symbol;Acc:1311968]
ENSRNOG00000030888	465.41	-0.252966	0.103752	-2.43819	0.0147612	0.0465248	ENSRNOG00000030888	Rela	RELA proto-oncogene, NF-kB subunit [Source:RGD Symbol;Acc:727889]
ENSRNOG00000011683	67.0073	0.0184218	0.234263	0.0786371	0.937321	0.963546	ENSRNOG00000011683	Fes	FES proto-oncogene, tyrosine kinase [Source:RGD Symbol;Acc:1564385]
ENSRNOG00000018599	580.655	0.0916991	0.0885257	1.03585	0.300273	0.4609	ENSRNOG00000018599	Gga2	golgi associated, gamma adaptin ear containing, ARF binding protein 2 [Source:RGD Symbol;Acc:1304800]
ENSRNOG00000021689	597.072	0.484471	0.111972	4.3267	1.51361e-05	0.000141152	ENSRNOG00000021689	Rps6kb2	ribosomal protein S6 kinase B2 [Source:RGD Symbol;Acc:1305144]
ENSRNOG00000024036	457.207	0.245475	0.108229	2.26811	0.0233227	0.0669743	ENSRNOG00000024036	Fam98c	family with sequence similarity 98, member C [Source:RGD Symbol;Acc:1303117]
ENSRNOG00000015727	24.7863	0.0546434	0.373891	0.146148	0.883805	0.930875	ENSRNOG00000015727	Loxl4	lysyl oxidase-like 4 [Source:RGD Symbol;Acc:1308588]
ENSRNOG00000024625	223.176	-0.171666	0.146035	-1.17552	0.239788	0.394772	ENSRNOG00000024625	Proser3	proline and serine rich 3 [Source:RGD Symbol;Acc:1565712]
ENSRNOG00000011352	789.884	-0.200777	0.0946647	-2.12093	0.0339279	0.0898932	ENSRNOG00000011352	Furin	furin (paired basic amino acid cleaving enzyme) [Source:RGD Symbol;Acc:3274]
ENSRNOG00000017725	110.016	-1.12185	0.218036	-5.14524	2.67177e-07	4.03566e-06	ENSRNOG00000017725	Pnlip	pancreatic lipase [Source:RGD Symbol;Acc:3360]
ENSRNOG00000020742	1597.87	-0.0835099	0.0812885	-1.02733	0.304266	0.465619	ENSRNOG00000020742	Pcnx3	pecanex 3 [Source:RGD Symbol;Acc:1305529]
ENSRNOG00000018877	849.311	-0.073105	0.0843184	-0.867012	0.385936	0.54861	ENSRNOG00000018877	Zfp689	zinc finger protein 689 [Source:RGD Symbol;Acc:628696]
ENSRNOG00000020922	784.313	-0.491889	0.077737	-6.3276	2.49e-10	7.48375e-09	ENSRNOG00000020922	Hspb6	heat shock protein family B (small) member 6 [Source:RGD Symbol;Acc:621554]
ENSRNOG00000011213	91.6664	-0.539444	0.210259	-2.56562	0.0102991	0.0349252	ENSRNOG00000011213	Blm	BLM RecQ like helicase [Source:RGD Symbol;Acc:1308810]
ENSRNOG00000020929	309.56	-0.0402537	0.121429	-0.331499	0.740268	0.837997	ENSRNOG00000020929	Lin37	lin-37 DREAM MuvB core complex component [Source:RGD Symbol;Acc:1308901]
ENSRNOG00000018627	5861.5	-0.165163	0.0712962	-2.31657	0.020527	0.0606525	ENSRNOG00000018627	Plekhb1	pleckstrin homology domain containing B1 [Source:RGD Symbol;Acc:621614]
ENSRNOG00000019858	187.623	-0.122561	0.152429	-0.804057	0.421364	0.58307	ENSRNOG00000019858	Rom1	retinal outer segment membrane protein 1 [Source:RGD Symbol;Acc:1306070]
ENSRNOG00000019813	504.139	-0.227042	0.113671	-1.99735	0.0457867	0.113478	ENSRNOG00000019813	Ppp4c	protein phosphatase 4, catalytic subunit [Source:RGD Symbol;Acc:621225]
ENSRNOG00000019913	930.984	-0.0512446	0.0756689	-0.677221	0.498266	0.650645	ENSRNOG00000019913	Mta2	metastasis associated 1 family, member 2 [Source:RGD Symbol;Acc:1306743]
ENSRNOG00000067655	64.3598	-0.508574	0.25109	-2.02547	0.0428196	0.107951	ENSRNOG00000067655	LOC103691235	uncharacterized LOC103691235 [Source:RGD Symbol;Acc:9213265]
ENSRNOG00000019005	302.353	-0.0764674	0.188532	-0.405595	0.68504	0.798329	ENSRNOG00000019005	Pde8a	phosphodiesterase 8A [Source:RGD Symbol;Acc:735125]
ENSRNOG00000014234	800.252	0.132221	0.0865116	1.52836	0.126423	0.247804	ENSRNOG00000014234	Hif1an	hypoxia inducible factor 1 subunit alpha inhibitor [Source:RGD Symbol;Acc:1308281]
ENSRNOG00000052802	539.339	-0.520508	0.232234	-2.24131	0.0250063	0.0707309	ENSRNOG00000052802	Aldoa	aldolase, fructose-bisphosphate A [Source:RGD Symbol;Acc:2089]
ENSRNOG00000012196	510.124	0.66033	0.128642	5.13309	2.8503e-07	4.28333e-06	ENSRNOG00000012196	Asah2	N-acylsphingosine amidohydrolase 2 [Source:RGD Symbol;Acc:69410]
ENSRNOG00000010630	188.323	0.0915124	0.151389	0.604485	0.545521	0.690868	ENSRNOG00000010630	Prcp	prolylcarboxypeptidase [Source:RGD Symbol;Acc:1307842]
ENSRNOG00000014078	3971.74	-0.272139	0.0648452	-4.19675	2.70768e-05	0.000235751	ENSRNOG00000014078	Ndufb8	NADH:ubiquinone oxidoreductase subunit B8 [Source:RGD Symbol;Acc:1309129]
ENSRNOG00000036866	349.296	0.386647	0.111508	3.46744	0.000525448	0.00299322	ENSRNOG00000036866	Acer3	alkaline ceramidase 3 [Source:RGD Symbol;Acc:1561254]
ENSRNOG00000014183	1403.98	0.421271	0.082799	5.08787	3.621e-07	5.26909e-06	ENSRNOG00000014183	Gnaq	G protein subunit alpha q [Source:RGD Symbol;Acc:620770]
ENSRNOG00000014482	938.987	0.617502	0.0988612	6.24615	4.20687e-10	1.20523e-08	ENSRNOG00000014482	Slf2	SMC5-SMC6 complex localization factor 2 [Source:RGD Symbol;Acc:1560300]
ENSRNOG00000012061	10376.1	0.372091	0.0551697	6.74449	1.53571e-11	6.11661e-10	ENSRNOG00000012061	Prkcb	protein kinase C, beta [Source:RGD Symbol;Acc:3396]
ENSRNOG00000020076	1626.77	-0.0411808	0.0658715	-0.625168	0.531861	0.679009	ENSRNOG00000020076	Borcs7	BLOC-1 related complex subunit 7 [Source:RGD Symbol;Acc:1311783]
ENSRNOG00000020081	256.647	0.0587029	0.173698	0.337959	0.735394	0.834666	ENSRNOG00000020081	As3mt	arsenite methyltransferase [Source:RGD Symbol;Acc:621325]
ENSRNOG00000014833	399.276	0.235434	0.0997508	2.36022	0.0182641	0.0552433	ENSRNOG00000014833	Smndc1	survival motor neuron domain containing 1 [Source:RGD Symbol;Acc:1309151]
ENSRNOG00000050742	265.265	0.0189762	0.164779	0.115162	0.908317	0.946037	ENSRNOG00000050742	Dnmbp	dynamin binding protein [Source:RGD Symbol;Acc:1583840]
ENSRNOG00000016770	29228.4	-0.217086	0.0460875	-4.71029	2.47362e-06	2.88073e-05	ENSRNOG00000016770	Calm3	calmodulin 3 [Source:RGD Symbol;Acc:2259]
ENSRNOG00000019914	1092.11	-0.28867	0.0790262	-3.65283	0.000259362	0.00165589	ENSRNOG00000019914	Tlcd3b	TLC domain containing 3B [Source:RGD Symbol;Acc:1308215]
ENSRNOG00000028746	2217.04	-0.191689	0.0742782	-2.58069	0.00986022	0.0337013	ENSRNOG00000028746	Gsto1	glutathione S-transferase omega 1 [Source:RGD Symbol;Acc:70952]
ENSRNOG00000069697	93.4377	0.143929	0.209363	0.687461	0.491793	0.645086	ENSRNOG00000069697	Gsto2	glutathione S-transferase omega 2 [Source:RGD Symbol;Acc:1310764]
ENSRNOG00000069311	49.2071	0.73944	0.29439	2.51177	0.0120127	0.0395498	ENSRNOG00000069311
ENSRNOG00000014276	105.792	-0.0322703	0.20511	-0.157332	0.874983	0.925148	ENSRNOG00000014276	Plce1	phospholipase C, epsilon 1 [Source:RGD Symbol;Acc:69424]
ENSRNOG00000031328	690.511	0.0753826	0.0918862	0.820391	0.411993	0.574052	ENSRNOG00000031328	Zfp110	zinc finger protein 110 [Source:RGD Symbol;Acc:1306339]
ENSRNOG00000016701	122.117	-0.0560647	0.19289	-0.290656	0.771315	0.859095	ENSRNOG00000016701	Gng8	G protein subunit gamma 8 [Source:RGD Symbol;Acc:620808]
ENSRNOG00000027944	1612.36	-0.146926	0.0920825	-1.59559	0.11058	0.224444	ENSRNOG00000027944	Pnma8a	PNMA family member 8A [Source:RGD Symbol;Acc:1310803]
ENSRNOG00000042679	338.829	0.957531	0.128363	7.45955	8.68176e-14	5.45281e-12	ENSRNOG00000042679	Lcor	ligand dependent nuclear receptor corepressor [Source:RGD Symbol;Acc:1311704]
ENSRNOG00000027919	285.627	-0.0109829	0.124649	-0.0881108	0.929789	0.958876	ENSRNOG00000027919	Rdh13	retinol dehydrogenase 13 [Source:RGD Symbol;Acc:1304959]
ENSRNOG00000068425	127.735	0.297013	0.18912	1.5705	0.116299	0.233121	ENSRNOG00000068425	Zfp551	zinc finger protein 551 [Source:RGD Symbol;Acc:1592780]
ENSRNOG00000026432	2179.83	-0.194924	0.0788488	-2.47213	0.0134313	0.0430908	ENSRNOG00000026432	Syt7	synaptotagmin 7 [Source:RGD Symbol;Acc:62013]
ENSRNOG00000011262	614.318	-0.323266	0.0947715	-3.411	0.000647257	0.00355882	ENSRNOG00000011262	Bicra	BRD4 interacting chromatin remodeling complex associated protein [Source:RGD Symbol;Acc:1306385]
ENSRNOG00000026065	1275.46	0.0939017	0.115821	0.810751	0.417509	0.579479	ENSRNOG00000026065	Slit1	slit guidance ligand 1 [Source:RGD Symbol;Acc:69307]
ENSRNOG00000043503	1117.66	-0.24623	0.0732663	-3.36076	0.000777289	0.00414657	ENSRNOG00000043503	Ehd1	EH-domain containing 1 [Source:RGD Symbol;Acc:1309017]
ENSRNOG00000062534	48.9387	0.0372774	0.274616	0.135744	0.892024	0.936033	ENSRNOG00000062534	LOC100364427	ribosomal protein S12-like [Source:RGD Symbol;Acc:2321033]
ENSRNOG00000019464	56.3823	-0.0453562	0.260869	-0.173866	0.861971	0.916405	ENSRNOG00000019464	Ttc9c	tetratricopeptide repeat domain 9C [Source:RGD Symbol;Acc:1359253]
ENSRNOG00000001492	4654.86	-0.243861	0.0804336	-3.03183	0.00243076	0.0107314	ENSRNOG00000001492	Slc8a2	solute carrier family 8 member A2 [Source:RGD Symbol;Acc:620194]
ENSRNOG00000021916	48.5761	0.238648	0.288351	0.82763	0.40788	0.569938	ENSRNOG00000021916	Slc16a12	solute carrier family 16, member 12 [Source:RGD Symbol;Acc:1311468]
ENSRNOG00000015304	528.413	-0.160235	0.113931	-1.40642	0.1596	0.294115	ENSRNOG00000015304	Tmem160	transmembrane protein 160 [Source:RGD Symbol;Acc:1564549]
ENSRNOG00000062406	1580.47	0.588475	0.0745957	7.88887	3.04946e-15	2.51786e-13	ENSRNOG00000062406	Mosmo	modulator of smoothened [Source:RGD Symbol;Acc:7606925]
ENSRNOG00000015376	434.322	0.0242638	0.105597	0.229776	0.818266	0.88888	ENSRNOG00000015376	Npas1	neuronal PAS domain protein 1 [Source:RGD Symbol;Acc:1310040]
ENSRNOG00000020773	325.146	-0.500832	0.132883	-3.76897	0.000163921	0.00111898	ENSRNOG00000020773	Map3k11	mitogen-activated protein kinase kinase kinase 11 [Source:RGD Symbol;Acc:1359261]
ENSRNOG00000016907	2440.75	-0.131678	0.0665315	-1.97919	0.047795	0.117132	ENSRNOG00000016907	Ppp5c	protein phosphatase 5, catalytic subunit [Source:RGD Symbol;Acc:68415]
ENSRNOG00000053347	438.256	-0.0490718	0.10456	-0.469315	0.638844	0.764833	ENSRNOG00000053347	Ccdc28a	coiled-coil domain containing 28A [Source:RGD Symbol;Acc:1310326]
ENSRNOG00000025110	79.9906	0.669858	0.332105	2.01701	0.0436945	0.109613	ENSRNOG00000025110	Vwa3a	von Willebrand factor A domain containing 3A [Source:RGD Symbol;Acc:1311670]
ENSRNOG00000021390	502.101	-0.0141681	0.0941265	-0.150522	0.880353	0.928458	ENSRNOG00000021390	Meis3	Meis homeobox 3 [Source:RGD Symbol;Acc:1308532]
ENSRNOG00000020144	590.209	0.140669	0.0924474	1.52161	0.128106	0.250368	ENSRNOG00000020144	Rusf1	RUS family member 1 [Source:RGD Symbol;Acc:1310127]
ENSRNOG00000014531	1774.07	-0.157453	0.0584465	-2.69396	0.00706084	0.0258393	ENSRNOG00000014531	Hbs1l	HBS1-like translational GTPase [Source:RGD Symbol;Acc:1308509]
ENSRNOG00000020165	20.0387	0.831925	0.465614	1.78672	0.0739821	0.164895	ENSRNOG00000020165	Ahsp	alpha hemoglobin stabilizing protein [Source:RGD Symbol;Acc:1306725]
ENSRNOG00000028832	551.468	0.43684	0.124546	3.50747	0.000452398	0.00264369	ENSRNOG00000028832	Sorcs3	sortilin-related VPS10 domain containing receptor 3 [Source:RGD Symbol;Acc:1310974]
ENSRNOG00000014353	1678.32	-0.127717	0.0643271	-1.98543	0.0470964	0.11571	ENSRNOG00000014353	Sympk	symplekin scaffold protein [Source:RGD Symbol;Acc:1306735]
ENSRNOG00000009482	301.262	-0.197292	0.1344	-1.46795	0.142119	0.270209	ENSRNOG00000009482	Emx2	empty spiracles homeobox 2 [Source:RGD Symbol;Acc:1564797]
ENSRNOG00000036760	97.098	-0.0340659	0.199884	-0.170429	0.864673	0.918066	ENSRNOG00000036760	Tmc5	transmembrane channel-like 5 [Source:RGD Symbol;Acc:1307037]
ENSRNOG00000014768	242.682	0.163736	0.132045	1.24	0.214975	0.365048	ENSRNOG00000014768	Glis3	GLIS family zinc finger 3 [Source:RGD Symbol;Acc:1565505]
ENSRNOG00000027936	107.227	-0.39977	0.178272	-2.24248	0.0249304	0.0705842	ENSRNOG00000027936	Ccdc8	coiled-coil domain containing 8 [Source:RGD Symbol;Acc:1359717]
ENSRNOG00000058050	3446.71	0.305966	0.0632881	4.8345	1.33483e-06	1.67988e-05	ENSRNOG00000058050	Bclaf1	mitochondrial fission regulator 2 [Source:RGD Symbol;Acc:6494892]
ENSRNOG00000019973	3368.65	-0.26459	0.0758203	-3.48969	0.000483574	0.00279367	ENSRNOG00000019973	Arl3	ADP ribosylation factor like GTPase 3 [Source:RGD Symbol;Acc:69327]
ENSRNOG00000060146	41.6943	0.148371	0.356487	0.416204	0.677261	0.792997	ENSRNOG00000060146	Six5	SIX homeobox 5 [Source:RGD Symbol;Acc:1305040]
ENSRNOG00000050395	36.3398	0.595591	0.35696	1.66851	0.0952148	0.200368	ENSRNOG00000050395	Ms4a6bl	membrane-spanning 4-domains, subfamily A, member 6B-like [Source:RGD Symbol;Acc:1359381]
ENSRNOG00000020075	7595.54	-0.336736	0.0566592	-5.94318	2.79553e-09	6.72437e-08	ENSRNOG00000020075	Eef1g	eukaryotic translation elongation factor 1 gamma [Source:RGD Symbol;Acc:1302939]
ENSRNOG00000021062	254.163	-0.125141	0.134435	-0.930864	0.351924	0.51459	ENSRNOG00000021062	Fxyd5	FXYD domain-containing ion transport regulator 5 [Source:RGD Symbol;Acc:620827]
ENSRNOG00000030616	26.6057	-0.227617	0.364406	-0.624623	0.532218	0.679348	ENSRNOG00000030616	Slc25a45	solute carrier family 25, member 45 [Source:RGD Symbol;Acc:1589953]
ENSRNOG00000001494	5783.74	-0.218569	0.0609209	-3.58776	0.000333537	0.00204847	ENSRNOG00000001494	Napa	NSF attachment protein alpha [Source:RGD Symbol;Acc:620855]
ENSRNOG00000014215	2129.98	-0.136738	0.108827	-1.25647	0.208945	0.358285	ENSRNOG00000014215	Klf9	KLF transcription factor 9 [Source:RGD Symbol;Acc:70934]
ENSRNOG00000023296	102.789	0.255408	0.200138	1.27616	0.201899	0.349384	ENSRNOG00000023296	Wtip	WT1 interacting protein [Source:RGD Symbol;Acc:1306411]
ENSRNOG00000019142	23.6291	-0.453937	0.431277	-1.05254	0.292551	0.452354	ENSRNOG00000019142	Fas	Fas cell surface death receptor [Source:RGD Symbol;Acc:619831]
ENSRNOG00000020776	572.996	-0.324512	0.11409	-2.84435	0.00445016	0.0177151	ENSRNOG00000020776	Dhcr7	7-dehydrocholesterol reductase [Source:RGD Symbol;Acc:621769]
ENSRNOG00000053725	1792.39	-0.375244	0.0623947	-6.01404	1.80952e-09	4.5152e-08	ENSRNOG00000053725	Usf2	upstream transcription factor 2, c-fos interacting [Source:RGD Symbol;Acc:620975]
ENSRNOG00000020705	105.122	0.161788	0.211951	0.763324	0.44527	0.604428	ENSRNOG00000020705	Rnls	renalase, FAD-dependent amine oxidase [Source:RGD Symbol;Acc:1309804]
ENSRNOG00000011245	191.354	-0.203464	0.155237	-1.31067	0.18997	0.334491	ENSRNOG00000011245	Arhgap18	Rho GTPase activating protein 18 [Source:RGD Symbol;Acc:1305053]
ENSRNOG00000021113	1939.62	-0.109888	0.0689949	-1.5927	0.111229	0.225361	ENSRNOG00000021113	Uba2	ubiquitin-like modifier activating enzyme 2 [Source:RGD Symbol;Acc:1312023]
ENSRNOG00000032677	1252.74	-0.450992	0.0956606	-4.7145	2.42303e-06	2.82854e-05	ENSRNOG00000032677	Tssc4	tumor suppressing subtransferable candidate 4 [Source:RGD Symbol;Acc:1307043]
ENSRNOG00000015128	1785.04	-0.159872	0.0563312	-2.83808	0.00453863	0.0179893	ENSRNOG00000015128	Sae1	SUMO1 activating enzyme subunit 1 [Source:RGD Symbol;Acc:1306098]
ENSRNOG00000010861	2566.58	0.258181	0.0603305	4.27944	1.87363e-05	0.000170085	ENSRNOG00000010861	Atad1	ATPase family, AAA domain containing 1 [Source:RGD Symbol;Acc:1308570]
ENSRNOG00000020457	1850.23	-0.303267	0.0572125	-5.30071	1.15354e-07	1.92874e-06	ENSRNOG00000020457	Tacc2	transforming, acidic coiled-coil containing protein 2 [Source:RGD Symbol;Acc:1303004]
ENSRNOG00000015229	865.207	-0.0350841	0.0824723	-0.425405	0.670542	0.788274	ENSRNOG00000015229	Zc3h4	zinc finger CCCH-type containing 4 [Source:RGD Symbol;Acc:1596943]
ENSRNOG00000021053	257.756	-0.22301	0.164404	-1.35648	0.174948	0.314868	ENSRNOG00000021053	Lsr	lipolysis stimulated lipoprotein receptor [Source:RGD Symbol;Acc:69236]
ENSRNOG00000020692	219.985	-0.0177964	0.160101	-0.111157	0.911492	0.947688	ENSRNOG00000020692	Tmem216	transmembrane protein 216 [Source:RGD Symbol;Acc:1304607]
ENSRNOG00000015473	47.8201	-0.0841599	0.293537	-0.28671	0.774334	0.861172	ENSRNOG00000015473	Phactr2	phosphatase and actin regulator 2 [Source:RGD Symbol;Acc:1303141]
ENSRNOG00000015948	74.7817	-0.622721	0.240856	-2.58545	0.00972523	0.0333329	ENSRNOG00000015948	Slc1a5	solute carrier family 1 member 5 [Source:RGD Symbol;Acc:708512]
ENSRNOG00000025350	88.0312	-0.265783	0.247968	-1.07184	0.28379	0.442204	ENSRNOG00000025350	Ppp1r13l	protein phosphatase 1, regulatory subunit 13 like [Source:RGD Symbol;Acc:1593681]
ENSRNOG00000016055	1158.87	-0.105117	0.073771	-1.42491	0.154182	0.286438	ENSRNOG00000016055	Fkrp	fukutin related protein [Source:RGD Symbol;Acc:1305852]
ENSRNOG00000012701	1060.58	0.232245	0.0832396	2.79008	0.00526949	0.0203056	ENSRNOG00000012701	Map7	microtubule-associated protein 7 [Source:RGD Symbol;Acc:1308866]
ENSRNOG00000016145	4487.88	-0.264226	0.0549435	-4.80905	1.5165e-06	1.88402e-05	ENSRNOG00000016145	Strn4	striatin 4 [Source:RGD Symbol;Acc:1307030]
ENSRNOG00000017955	139.791	0.245141	0.175532	1.39656	0.162546	0.29843	ENSRNOG00000017955	Nudt8	nudix hydrolase 8 [Source:RGD Symbol;Acc:1309040]
ENSRNOG00000020807	31.1928	-0.565001	0.356538	-1.58469	0.113037	0.227951	ENSRNOG00000020807	Wdr62	WD repeat domain 62 [Source:RGD Symbol;Acc:1306714]
ENSRNOG00000046667	229.093	0.328603	0.49856	0.659105	0.509829	0.659997	ENSRNOG00000046667	Fosb	FosB proto-oncogene, AP-1 transcription factor subunit [Source:RGD Symbol;Acc:1308198]
ENSRNOG00000013279	73.9493	-0.271269	0.242479	-1.11874	0.263253	0.42009	ENSRNOG00000013279	LOC681458	similar to stearoyl-coenzyme A desaturase 3 [Source:RGD Symbol;Acc:1595370]
ENSRNOG00000047605	343.248	-0.126982	0.125877	-1.00878	0.313082	0.47461	ENSRNOG00000047605	Ptprk	protein tyrosine phosphatase, receptor type, K [Source:RGD Symbol;Acc:619706]
ENSRNOG00000010117	3646.61	0.00644945	0.0473304	0.136264	0.891612	0.935735	ENSRNOG00000010117	Eif3a	eukaryotic translation initiation factor 3, subunit A [Source:RGD Symbol;Acc:1307269]
ENSRNOG00000018282	1251.88	-0.00692357	0.126229	-0.0548491	0.956259	0.975982	ENSRNOG00000018282	Gda	guanine deaminase [Source:RGD Symbol;Acc:621617]
ENSRNOG00000013456	616.964	0.00631945	0.0918054	0.0688353	0.945121	0.968717	ENSRNOG00000013456	Ighmbp2	immunoglobulin mu DNA binding protein 2 [Source:RGD Symbol;Acc:68325]
ENSRNOG00000070097	25.8047	-0.212667	0.358627	-0.593004	0.553179	0.696505	ENSRNOG00000070097
ENSRNOG00000025111	31.4182	0.54257	0.39653	1.3683	0.17122	0.310018	ENSRNOG00000025111	Nfkbid	NFKB inhibitor delta [Source:RGD Symbol;Acc:1308055]
ENSRNOG00000049028	88.9952	0.383845	0.22042	1.74142	0.0816097	0.178008	ENSRNOG00000049028	C5ar2	complement C5a receptor 2 [Source:RGD Symbol;Acc:1303027]
ENSRNOG00000024931	98.2256	-0.297188	0.200071	-1.48541	0.137434	0.263141	ENSRNOG00000024931	Ccdc88b	coiled-coil domain containing 88B [Source:RGD Symbol;Acc:1311475]
ENSRNOG00000011720	363.522	0.0994395	0.133257	0.746222	0.455533	0.612868	ENSRNOG00000011720	L3mbtl3	L3MBTL histone methyl-lysine binding protein 3 [Source:RGD Symbol;Acc:1305474]
ENSRNOG00000024278	709.492	-0.520179	0.0887088	-5.8639	4.5212e-09	1.01603e-07	ENSRNOG00000024278	Rbm42	RNA binding motif protein 42 [Source:RGD Symbol;Acc:1306184]
ENSRNOG00000014132	623.671	-0.227448	0.0990474	-2.29635	0.0216559	0.0631877	ENSRNOG00000014132	Mypop	Myb-related transcription factor, partner of profilin [Source:RGD Symbol;Acc:1565160]
ENSRNOG00000019507	2782.91	-0.157715	0.0560547	-2.81359	0.00489913	0.0191293	ENSRNOG00000019507	Hnrnpul2	heterogeneous nuclear ribonucleoprotein U-like 2 [Source:RGD Symbol;Acc:1562784]
ENSRNOG00000070506	130.953	0.521528	0.169522	3.07645	0.00209479	0.0094759	ENSRNOG00000070506	Chst8	carbohydrate sulfotransferase 8 [Source:RGD Symbol;Acc:1308979]
ENSRNOG00000014254	1058.47	-0.245572	0.090601	-2.71047	0.0067187	0.0247605	ENSRNOG00000014254	Cpt1a	carnitine palmitoyltransferase 1A [Source:RGD Symbol;Acc:2396]
ENSRNOG00000021085	2147.48	0.0567455	0.0746235	0.760424	0.447001	0.605658	ENSRNOG00000021085	Sf1	splicing factor 1 [Source:RGD Symbol;Acc:620645]
ENSRNOG00000049951	1989.17	-0.421649	0.10208	-4.13058	3.61844e-05	0.000303021	ENSRNOG00000049951	Tmem151a	transmembrane protein 151A [Source:RGD Symbol;Acc:1310680]
ENSRNOG00000055934	70.4545	-1.10769	0.286208	-3.87022	0.000108735	0.000782991	ENSRNOG00000055934	Dmkn	dermokine [Source:RGD Symbol;Acc:1561521]
ENSRNOG00000020702	215.521	0.0465743	0.216131	0.215491	0.829385	0.8951	ENSRNOG00000020702	Cyb561a3	cytochrome b561 family, member A3 [Source:RGD Symbol;Acc:1304670]
ENSRNOG00000013422	585.511	0.252164	0.0954669	2.64137	0.00825705	0.0292578	ENSRNOG00000013422	Med23	mediator complex subunit 23 [Source:RGD Symbol;Acc:1307671]
ENSRNOG00000021052	646.632	0.214506	0.0905578	2.36872	0.0178497	0.0542491	ENSRNOG00000021052	Patl1	PAT1 homolog 1, processing body mRNA decay factor [Source:RGD Symbol;Acc:1305514]
ENSRNOG00000019229	421.991	-0.195163	0.110355	-1.76851	0.0769753	0.170226	ENSRNOG00000019229	Fbl	fibrillarin [Source:RGD Symbol;Acc:1305542]
ENSRNOG00000020845	282.382	-0.115492	0.141735	-0.814842	0.415163	0.577144	ENSRNOG00000020845	Tyrobp	transmembrane immune signaling adaptor Tyrobp [Source:RGD Symbol;Acc:1303081]
ENSRNOG00000020704	77.2384	-0.269984	0.229115	-1.17838	0.238645	0.393467	ENSRNOG00000020704	Tkfc	triokinase and FMN cyclase [Source:RGD Symbol;Acc:1311026]
ENSRNOG00000017225	296.932	0.183282	0.121234	1.51181	0.130583	0.253658	ENSRNOG00000017225	Fhip2a	FHF complex subunit HOOK interacting protein 2A [Source:RGD Symbol;Acc:1306116]
ENSRNOG00000013202	890.767	0.209339	0.0900676	2.32424	0.0201126	0.0596198	ENSRNOG00000013202	Akap7	A-kinase anchoring protein 7 [Source:RGD Symbol;Acc:1303071]
ENSRNOG00000067501	89.5249	-0.401479	0.200836	-1.99904	0.0456045	0.113151	ENSRNOG00000067501
ENSRNOG00000013791	28.5999	-0.941789	0.369984	-2.54548	0.0109126	0.036567	ENSRNOG00000013791	Enpp3	ectonucleotide pyrophosphatase/phosphodiesterase 3 [Source:RGD Symbol;Acc:708511]
ENSRNOG00000021125	3300.56	-0.206437	0.0676162	-3.05307	0.00226513	0.0101126	ENSRNOG00000021125	Prdx5	peroxiredoxin 5 [Source:RGD Symbol;Acc:71007]
ENSRNOG00000046000	926.825	0.425508	0.10286	4.13679	3.52197e-05	0.000296123	ENSRNOG00000046000	Clasrp	CLK4-associating serine/arginine rich protein [Source:RGD Symbol;Acc:1563538]
ENSRNOG00000015036	535.798	0.42851	0.213145	2.01042	0.0443867	0.110944	ENSRNOG00000015036	Ccn2	cellular communication network factor 2 [Source:RGD Symbol;Acc:621392]
ENSRNOG00000013239	1198.66	0.0990951	0.0754863	1.31276	0.189265	0.333489	ENSRNOG00000013239	Tle4	TLE family member 4, transcriptional corepressor [Source:RGD Symbol;Acc:3868]
ENSRNOG00000009954	1108.29	0.152392	0.0740747	2.05728	0.0396596	0.101559	ENSRNOG00000009954	Cacul1	CDK2-associated, cullin domain 1 [Source:RGD Symbol;Acc:1308127]
ENSRNOG00000033235	58.1305	-0.146136	0.260532	-0.560915	0.574856	0.714353	ENSRNOG00000033235	Relb	RELB proto-oncogene, NF-kB subunit [Source:RGD Symbol;Acc:2321078]
ENSRNOG00000025890	1714.2	-0.177272	0.0676511	-2.62038	0.00878308	0.0306761	ENSRNOG00000025890	Opa3	outer mitochondrial membrane lipid metabolism regulator OPA3 [Source:RGD Symbol;Acc:1309147]
ENSRNOG00000013845	404.395	-0.225143	0.112524	-2.00085	0.0454086	0.112808	ENSRNOG00000013845	Mrpl21	mitochondrial ribosomal protein L21 [Source:RGD Symbol;Acc:1310203]
ENSRNOG00000055286	528.493	-0.308556	0.103198	-2.98994	0.00279034	0.0120298	ENSRNOG00000055286	Yif1b	Yip1 interacting factor homolog B, membrane trafficking protein [Source:RGD Symbol;Acc:735199]
ENSRNOG00000016367	271.687	-0.275898	0.138875	-1.98666	0.0469599	0.115537	ENSRNOG00000016367	Vasp	vasodilator-stimulated phosphoprotein [Source:RGD Symbol;Acc:1311542]
ENSRNOG00000045543	95.6896	-0.0591661	0.202316	-0.292444	0.769947	0.858177	ENSRNOG00000045543	Frat2	FRAT regulator of WNT signaling pathway 2 [Source:RGD Symbol;Acc:1591882]
ENSRNOG00000011134	184.675	-0.383908	0.154409	-2.48631	0.0129077	0.0418312	ENSRNOG00000011134	Lama2	laminin subunit alpha 2 [Source:RGD Symbol;Acc:1308889]
ENSRNOG00000016265	1371.01	0.0116178	0.0794411	0.146245	0.883728	0.930875	ENSRNOG00000016265	Acsl5	acyl-CoA synthetase long-chain family member 5 [Source:RGD Symbol;Acc:69402]
ENSRNOG00000019964	3694.29	-0.232593	0.0582377	-3.99386	6.50073e-05	0.000502584	ENSRNOG00000019964	Taok2	TAO kinase 2 [Source:RGD Symbol;Acc:621590]
ENSRNOG00000021023	2434.64	-0.575539	0.097498	-5.90308	3.56775e-09	8.21868e-08	ENSRNOG00000021023	Mag	myelin-associated glycoprotein [Source:RGD Symbol;Acc:3035]
ENSRNOG00000012536	746.05	-0.106553	0.110597	-0.963434	0.33533	0.498164	ENSRNOG00000012536	Sgms1	sphingomyelin synthase 1 [Source:RGD Symbol;Acc:727912]
ENSRNOG00000013023	1434.91	-0.29877	0.0684429	-4.36524	1.26981e-05	0.000120636	ENSRNOG00000013023	Nop53	NOP53 ribosome biogenesis factor [Source:RGD Symbol;Acc:1303085]
ENSRNOG00000047783	439.489	0.162006	0.109478	1.4798	0.138928	0.265447	ENSRNOG00000047783	Tmem200a	transmembrane protein 200A [Source:RGD Symbol;Acc:1564024]
ENSRNOG00000020636	231.412	0.0190004	0.131721	0.144248	0.885305	0.931776	ENSRNOG00000020636	Spint2	serine peptidase inhibitor, Kunitz type, 2 [Source:RGD Symbol;Acc:735123]
ENSRNOG00000020715	4713.59	-0.196116	0.0513002	-3.82291	0.000131885	0.000926978	ENSRNOG00000020715	Ddb1	damage-specific DNA binding protein 1 [Source:RGD Symbol;Acc:621889]
ENSRNOG00000064132	527.454	0.047156	0.0929148	0.507518	0.611791	0.743837	ENSRNOG00000064132
ENSRNOG00000015852	6313.55	-0.0110168	0.051321	-0.214665	0.830029	0.895597	ENSRNOG00000015852	Arhgap35	Rho GTPase activating protein 35 [Source:RGD Symbol;Acc:1308738]
ENSRNOG00000020676	123.675	-1.09254	0.217361	-5.02638	4.99824e-07	6.96295e-06	ENSRNOG00000020676	Ppp1r14a	protein phosphatase 1, regulatory (inhibitor) subunit 14A [Source:RGD Symbol;Acc:620536]
ENSRNOG00000020250	191.763	0.811483	0.154935	5.23758	1.62694e-07	2.59339e-06	ENSRNOG00000020250	Pcgf6	polycomb group ring finger 6 [Source:RGD Symbol;Acc:1306904]
ENSRNOG00000031700	632.896	-0.130358	0.095137	-1.37021	0.170622	0.309126	ENSRNOG00000031700	Map3k5	mitogen-activated protein kinase kinase kinase 5 [Source:RGD Symbol;Acc:1306565]
ENSRNOG00000018730	156.188	-0.303424	0.177363	-1.71075	0.0871269	0.187126	ENSRNOG00000018730	Nectin2	nectin cell adhesion molecule 2 [Source:RGD Symbol;Acc:1309505]
ENSRNOG00000014997	992.433	0.153418	0.106486	1.44073	0.14966	0.280163	ENSRNOG00000014997	Igf2r	insulin-like growth factor 2 receptor [Source:RGD Symbol;Acc:2871]
ENSRNOG00000020881	367.846	-0.545319	0.111799	-4.87766	1.07354e-06	1.38196e-05	ENSRNOG00000020881	Frmd8	FERM domain containing 8 [Source:RGD Symbol;Acc:1310323]
ENSRNOG00000020201	239.177	-0.0332433	0.127934	-0.259848	0.794981	0.874399	ENSRNOG00000020201	Yif1a	Yip1 interacting factor homolog A, membrane trafficking protein [Source:RGD Symbol;Acc:628749]
ENSRNOG00000020687	1263.36	-0.146899	0.0938821	-1.56471	0.11765	0.235092	ENSRNOG00000020687	Dpf1	double PHD fingers 1 [Source:RGD Symbol;Acc:61868]
ENSRNOG00000020021	3998.18	-0.088176	0.0601529	-1.46586	0.142685	0.271006	ENSRNOG00000020021	Brsk2	BR serine/threonine kinase 2 [Source:RGD Symbol;Acc:1566256]
ENSRNOG00000048848	1347.47	-0.160772	0.0855778	-1.87866	0.0602909	0.140405	ENSRNOG00000048848	Ccdc9	InaF-motif containing 1 [Source:RGD Symbol;Acc:2301983]
ENSRNOG00000017294	758.277	0.174315	0.0920808	1.89307	0.0583491	0.136815	ENSRNOG00000017294	Zranb1	zinc finger RANBP2-type containing 1 [Source:RGD Symbol;Acc:2321751]
ENSRNOG00000020989	207.589	-0.379993	0.150437	-2.52592	0.0115395	0.0383094	ENSRNOG00000020989	Tm7sf2	transmembrane 7 superfamily member 2 [Source:RGD Symbol;Acc:1311205]
ENSRNOG00000013994	127.404	-0.0902567	0.195266	-0.462224	0.643921	0.76822	ENSRNOG00000013994	Enpp1	ectonucleotide pyrophosphatase/phosphodiesterase 1 [Source:RGD Symbol;Acc:628825]
ENSRNOG00000021057	1833.82	-0.114859	0.0539407	-2.12935	0.0332253	0.0884144	ENSRNOG00000021057	Osbp	oxysterol binding protein [Source:RGD Symbol;Acc:1308069]
ENSRNOG00000018107	3446.43	0.481254	0.065119	7.39039	1.46401e-13	8.85458e-12	ENSRNOG00000018107	Zfand5	zinc finger AN1-type containing 5 [Source:RGD Symbol;Acc:1310776]
ENSRNOG00000015271	236.668	0.198435	0.148076	1.34009	0.180215	0.322216	ENSRNOG00000015271	Zfp418	zinc finger protein 418 [Source:RGD Symbol;Acc:1311663]
ENSRNOG00000011346	158.057	-0.453948	0.201001	-2.25844	0.0239183	0.0683107	ENSRNOG00000011346	Ehd2	EH-domain containing 2 [Source:RGD Symbol;Acc:1560856]
ENSRNOG00000036576	631.536	0.0745641	0.0889555	0.838219	0.401908	0.56406	ENSRNOG00000036576	Zdhhc6	zinc finger DHHC-type palmitoyltransferase 6 [Source:RGD Symbol;Acc:1304657]
ENSRNOG00000020000	217.826	-0.233966	0.148317	-1.57747	0.114686	0.230644	ENSRNOG00000020000	Tmem219	transmembrane protein 219 [Source:RGD Symbol;Acc:1560566]
ENSRNOG00000027161	304.857	-0.0981356	0.123098	-0.797217	0.425325	0.58739	ENSRNOG00000027161	C1h9orf85	similar to human chromosome 9 open reading frame 85 [Source:RGD Symbol;Acc:1359158]
ENSRNOG00000066094	34.6004	-0.279758	0.339379	-0.824322	0.409756	0.571799	ENSRNOG00000066094	LOC691135	similar to zinc finger protein 418 [Source:RGD Symbol;Acc:1587451]
ENSRNOG00000045795	562.846	-0.0692906	0.0901381	-0.768716	0.442062	0.601998	ENSRNOG00000045795	Gatd1	glutamine amidotransferase class 1 domain containing 1 [Source:RGD Symbol;Acc:1304836]
ENSRNOG00000061526	86.805	-0.5357	0.215535	-2.48544	0.0129392	0.0419056	ENSRNOG00000061526	Rsph6a	radial spoke head 6 homolog A [Source:RGD Symbol;Acc:1306786]
ENSRNOG00000021133	1282.6	-0.0130881	0.06267	-0.208841	0.834572	0.899114	ENSRNOG00000021133	Lsm14a	LSM14A mRNA processing body assembly factor [Source:RGD Symbol;Acc:1305695]
ENSRNOG00000025476	46.4908	-1.06114	0.304185	-3.48847	0.00048579	0.00280426	ENSRNOG00000025476	Tmem252	transmembrane protein 252 [Source:RGD Symbol;Acc:1359349]
ENSRNOG00000021174	255.483	-0.0972303	0.12917	-0.752729	0.451613	0.609099	ENSRNOG00000021174	Macrod1	mono-ADP ribosylhydrolase 1 [Source:RGD Symbol;Acc:628701]
ENSRNOG00000017002	541.107	0.265686	0.104883	2.53316	0.0113039	0.0376975	ENSRNOG00000017002	Adrb1	adrenoceptor beta 1 [Source:RGD Symbol;Acc:2059]
ENSRNOG00000062946	38.9828	0.486025	0.330687	1.46974	0.141632	0.269399	ENSRNOG00000062946
ENSRNOG00000021139	67.4162	-0.277163	0.288356	-0.961184	0.33646	0.499439	ENSRNOG00000021139	Esrra	estrogen related receptor, alpha [Source:RGD Symbol;Acc:1583866]
ENSRNOG00000027156	1805.21	-0.137618	0.0751861	-1.83036	0.0671956	0.152828	ENSRNOG00000027156	Morn4	MORN repeat containing 4 [Source:RGD Symbol;Acc:1307336]
ENSRNOG00000014984	1616.98	-0.175758	0.0664237	-2.64601	0.00814479	0.0289394	ENSRNOG00000014984	Dmwd	DM1 locus, WD repeat containing [Source:RGD Symbol;Acc:1594179]
ENSRNOG00000022946	77.5833	-1.06943	0.229514	-4.65955	3.16908e-06	3.59382e-05	ENSRNOG00000022946	Slc22a3	solute carrier family 22 member 3 [Source:RGD Symbol;Acc:3701]
ENSRNOG00000013304	30.2286	-0.0643471	0.367108	-0.175281	0.860859	0.915885	ENSRNOG00000013304	Arg1	arginase 1 [Source:RGD Symbol;Acc:2150]
ENSRNOG00000020703	915.056	-0.0817662	0.101094	-0.808814	0.418622	0.58026	ENSRNOG00000020703	Sipa1l3	signal-induced proliferation-associated 1 like 3 [Source:RGD Symbol;Acc:1311432]
ENSRNOG00000012514	452.916	0.315845	0.116589	2.70905	0.00674752	0.0248356	ENSRNOG00000012514	Abhd17b	abhydrolase domain containing 17B, depalmitoylase [Source:RGD Symbol;Acc:1305246]
ENSRNOG00000014675	1695.37	0.0187229	0.0661346	0.283103	0.777098	0.862875	ENSRNOG00000014675	Pi4k2a	phosphatidylinositol 4-kinase type 2 alpha [Source:RGD Symbol;Acc:620485]
ENSRNOG00000015598	32.2343	-0.223872	0.378816	-0.590978	0.554535	0.697568	ENSRNOG00000015598	Zfp772	zinc finger protein 772 [Source:RGD Symbol;Acc:1308782]
ENSRNOG00000042786	1239.95	-0.119884	0.0615526	-1.94767	0.0514543	0.124101	ENSRNOG00000042786	Vti1a	vesicle transport through interaction with t-SNAREs 1A [Source:RGD Symbol;Acc:621490]
ENSRNOG00000059386	382.869	-0.239777	0.113423	-2.11401	0.0345148	0.0911035	ENSRNOG00000059386	Nudt19	nudix hydrolase 19 [Source:RGD Symbol;Acc:1302935]
ENSRNOG00000017326	606.783	-0.0917015	0.0990856	-0.925478	0.354717	0.517345	ENSRNOG00000017326	Ctbp2	C-terminal binding protein 2 [Source:RGD Symbol;Acc:68372]
ENSRNOG00000016411	3654.22	-0.507262	0.0774287	-6.55134	5.70226e-11	2.00493e-09	ENSRNOG00000016411	Rps12	ribosomal protein S12 [Source:RGD Symbol;Acc:62024]
ENSRNOG00000021090	3103.23	-0.381816	0.0984442	-3.8785	0.000105101	0.000760546	ENSRNOG00000021090	Pygm	glycogen phosphorylase, muscle associated [Source:RGD Symbol;Acc:3461]
ENSRNOG00000014173	1203.7	-0.139591	0.0710047	-1.96594	0.0493053	0.119993	ENSRNOG00000014173	Smc3	structural maintenance of chromosomes 3 [Source:RGD Symbol;Acc:62006]
ENSRNOG00000020941	900.312	-0.240409	0.0746165	-3.22193	0.00127331	0.00630094	ENSRNOG00000020941	Psenen	presenilin enhancer gamma secretase subunit [Source:RGD Symbol;Acc:1312037]
ENSRNOG00000029399	493.721	-0.594591	0.101802	-5.84065	5.19987e-09	1.15442e-07	ENSRNOG00000029399	Bcam	basal cell adhesion molecule (Lutheran blood group) [Source:RGD Symbol;Acc:68378]
ENSRNOG00000018553	6622.99	-0.313527	0.0548817	-5.71277	1.11152e-08	2.30086e-07	ENSRNOG00000018553	Pitpnm1	phosphatidylinositol transfer protein, membrane-associated 1 [Source:RGD Symbol;Acc:1306710]
ENSRNOG00000020247	3226.22	-0.464396	0.0720872	-6.44214	1.17802e-10	3.83039e-09	ENSRNOG00000020247	Cnih2	cornichon family AMPA receptor auxiliary protein 2 [Source:RGD Symbol;Acc:1304930]
ENSRNOG00000016448	773.319	-0.213373	0.0932456	-2.28829	0.0221204	0.0642244	ENSRNOG00000016448	Eef2k	eukaryotic elongation factor-2 kinase [Source:RGD Symbol;Acc:2538]
ENSRNOG00000015406	149.488	-0.278975	0.169688	-1.64405	0.100167	0.208136	ENSRNOG00000015406	Pgm5	phosphoglucomutase 5 [Source:RGD Symbol;Acc:1307969]
ENSRNOG00000027459	406.145	-0.227233	0.14711	-1.54464	0.122433	0.2423	ENSRNOG00000027459	Zbtb45	zinc finger and BTB domain containing 45 [Source:RGD Symbol;Acc:1310920]
ENSRNOG00000015670	2726.41	0.302914	0.0599856	5.04978	4.4233e-07	6.23889e-06	ENSRNOG00000015670	Stx7	syntaxin 7 [Source:RGD Symbol;Acc:619747]
ENSRNOG00000022289	855.682	-0.2214	0.0880785	-2.51367	0.0119483	0.0393846	ENSRNOG00000022289	Aip	aryl-hydrocarbon receptor-interacting protein [Source:RGD Symbol;Acc:628619]
ENSRNOG00000020935	125.441	0.134878	0.199709	0.675375	0.499438	0.651828	ENSRNOG00000020935	Capn1	calpain 1 [Source:RGD Symbol;Acc:2267]
ENSRNOG00000019202	69.1511	-0.2122	0.330646	-0.641774	0.52102	0.669063	ENSRNOG00000019202	Pvr	PVR cell adhesion molecule [Source:RGD Symbol;Acc:3813]
ENSRNOG00000025245	300.004	-0.214883	0.12369	-1.73728	0.0823382	0.179207	ENSRNOG00000025245	RGD1311946	similar to RIKEN cDNA 1810055G02 [Source:RGD Symbol;Acc:1311946]
ENSRNOG00000018018	2903.84	-0.395558	0.0724826	-5.45728	4.83481e-08	8.8051e-07	ENSRNOG00000018018	Kcnip2	potassium voltage-gated channel interacting protein 2 [Source:RGD Symbol;Acc:70887]
ENSRNOG00000020996	933.614	-0.363147	0.0874621	-4.15205	3.29504e-05	0.000279441	ENSRNOG00000020996	Vps51	VPS51 subunit of GARP complex [Source:RGD Symbol;Acc:2319165]
ENSRNOG00000027487	2374.14	-0.160746	0.0557294	-2.8844	0.00392161	0.0159922	ENSRNOG00000027487	Trim28	tripartite motif-containing 28 [Source:RGD Symbol;Acc:620289]
ENSRNOG00000070897	3226.07	-0.171498	0.0463505	-3.70001	0.00021559	0.0014215	ENSRNOG00000070897	Rab1b	RAB1B, member RAS oncogene family [Source:RGD Symbol;Acc:1642882]
ENSRNOG00000020957	30.9783	0.336457	0.386531	0.870452	0.384054	0.546942	ENSRNOG00000020957	Igflr1	IGF-like family receptor 1 [Source:RGD Symbol;Acc:1563574]
ENSRNOG00000052664	4237.44	0.331202	0.0665795	4.97453	6.54062e-07	8.94714e-06	ENSRNOG00000052664	Tnks2	tankyrase 2 [Source:RGD Symbol;Acc:1305026]
ENSRNOG00000012782	482.658	0.264018	0.114311	2.30965	0.0209074	0.0615143	ENSRNOG00000012782	Cemip2	cell migration inducing hyaluronidase 2 [Source:RGD Symbol;Acc:1307941]
ENSRNOG00000022153	566.392	-0.101095	0.104387	-0.96846	0.332814	0.495881	ENSRNOG00000022153	Tmem134	transmembrane protein 134 [Source:RGD Symbol;Acc:1305824]
ENSRNOG00000043328	1399.37	-0.311942	0.0742727	-4.19996	2.66965e-05	0.000232853	ENSRNOG00000043328	Chmp2a	charged multivesicular body protein 2A [Source:RGD Symbol;Acc:1305050]
ENSRNOG00000012346	2075.37	-0.17516	0.0756452	-2.31554	0.0205831	0.0607893	ENSRNOG00000012346	Epb41l2	erythrocyte membrane protein band 4.1-like 2 [Source:RGD Symbol;Acc:1563977]
ENSRNOG00000020299	8089.01	-0.142274	0.0672564	-2.11539	0.0343968	0.0908409	ENSRNOG00000020299	Klc2	kinesin light chain 2 [Source:RGD Symbol;Acc:1307377]
ENSRNOG00000027514	5115.41	-0.0890458	0.0590999	-1.5067	0.131888	0.255383	ENSRNOG00000027514	Ube2m	ubiquitin-conjugating enzyme E2M [Source:RGD Symbol;Acc:1307614]
ENSRNOG00000018847	872.453	-0.119102	0.0780077	-1.52679	0.126813	0.248502	ENSRNOG00000018847	Stx5	syntaxin 5 [Source:RGD Symbol;Acc:68426]
ENSRNOG00000021179	302.503	0.258892	0.173296	1.49393	0.135195	0.260243	ENSRNOG00000021179	Naa40	N(alpha)-acetyltransferase 40, NatD catalytic subunit [Source:RGD Symbol;Acc:1565838]
ENSRNOG00000055525	999.97	0.056615	0.0870952	0.650035	0.515669	0.665156	ENSRNOG00000055525	Kmt2b	lysine methyltransferase 2B [Source:RGD Symbol;Acc:7678027]
ENSRNOG00000027550	171.257	0.302022	0.179244	1.68497	0.0919935	0.195352	ENSRNOG00000027550	Mzf1	myeloid zinc finger 1 [Source:RGD Symbol;Acc:1308391]
ENSRNOG00000020620	32.8351	-0.327553	0.341237	-0.959898	0.337107	0.500088	ENSRNOG00000020620	Ppp1r32	protein phosphatase 1, regulatory subunit 32 [Source:RGD Symbol;Acc:708532]
ENSRNOG00000018086	505.875	-0.763545	0.118555	-6.44041	1.1915e-10	3.85715e-09	ENSRNOG00000018086	Slc22a8	solute carrier family 22 member 8 [Source:RGD Symbol;Acc:632286]
ENSRNOG00000013387	109.505	0.00973715	0.190574	0.0510937	0.959251	0.977859	ENSRNOG00000013387	Tpcn2	two pore segment channel 2 [Source:RGD Symbol;Acc:1311779]
ENSRNOG00000015232	688.368	0.0395557	0.0933413	0.423775	0.67173	0.788783	ENSRNOG00000015232	Pip5k1b	phosphatidylinositol-4-phosphate 5-kinase type 1 beta [Source:RGD Symbol;Acc:1310914]
ENSRNOG00000024309	3993.74	-0.387148	0.0598471	-6.46895	9.86857e-11	3.26663e-09	ENSRNOG00000024309	Cox6b1	cytochrome c oxidase subunit 6B1 [Source:RGD Symbol;Acc:1584097]
ENSRNOG00000019069	1478.67	0.422918	0.080753	5.23719	1.63043e-07	2.596e-06	ENSRNOG00000019069	Nxf1	nuclear RNA export factor 1 [Source:RGD Symbol;Acc:62014]
ENSRNOG00000048337	571.913	-0.0581933	0.091024	-0.639317	0.522616	0.670186	ENSRNOG00000048337	Hnrnpr-ps2	heterogeneous nuclear ribonucleoprotein R, pseudogene 2 [Source:RGD Symbol;Acc:7597569]
ENSRNOG00000017448	37.1808	-0.395096	0.37253	-1.06058	0.288883	0.447907	ENSRNOG00000017448	Exoc3l2	exocyst complex component 3-like 2 [Source:RGD Symbol;Acc:1592539]
ENSRNOG00000022428	1316.77	-0.0720155	0.0890931	-0.808318	0.418908	0.580546	ENSRNOG00000022428	Flrt1	fibronectin leucine rich transmembrane protein 1 [Source:RGD Symbol;Acc:1565152]
ENSRNOG00000020350	2055.79	-0.0552704	0.0589009	-0.938363	0.348058	0.51103	ENSRNOG00000020350	Pacs1	phosphofurin acidic cluster sorting protein 1 [Source:RGD Symbol;Acc:620579]
ENSRNOG00000011815	1310.36	-0.123913	0.209759	-0.590737	0.554697	0.697679	ENSRNOG00000011815	Sgk1	serum/glucocorticoid regulated kinase 1 [Source:RGD Symbol;Acc:3668]
ENSRNOG00000017463	115.711	-0.559595	0.169281	-3.30572	0.000947316	0.00490236	ENSRNOG00000017463	Bloc1s3	biogenesis of lysosomal organelles complex-1, subunit 3 [Source:RGD Symbol;Acc:1591724]
ENSRNOG00000021573	2518.64	0.0733267	0.0788281	0.93021	0.352262	0.514786	ENSRNOG00000021573	Dpy19l3	dpy-19 like C-mannosyltransferase 3 [Source:RGD Symbol;Acc:1308334]
ENSRNOG00000017468	150.637	-0.34003	0.189928	-1.79031	0.0734037	0.163954	ENSRNOG00000017468	Trappc6a	trafficking protein particle complex subunit 6A [Source:RGD Symbol;Acc:1591735]
ENSRNOG00000019266	377.628	-0.221994	0.117846	-1.88376	0.059597	0.138987	ENSRNOG00000019266	Tmem223	transmembrane protein 223 [Source:RGD Symbol;Acc:1582829]
ENSRNOG00000043378	36.4177	0.111104	0.30459	0.364764	0.715287	0.820079	ENSRNOG00000043378	Nkpd1	NTPase, KAP family P-loop domain containing 1 [Source:RGD Symbol;Acc:1591760]
ENSRNOG00000013565	334.3	0.370656	0.140772	2.63302	0.00846297	0.0297916	ENSRNOG00000013565	Zfp507	zinc finger protein 507 [Source:RGD Symbol;Acc:1307017]
ENSRNOG00000019341	99.6725	-0.271752	0.208571	-1.30293	0.1926	0.337746	ENSRNOG00000019341	Tmem179b	transmembrane protein 179B [Source:RGD Symbol;Acc:1582850]
ENSRNOG00000019965	583.751	-0.339099	0.111015	-3.05454	0.00225408	0.0100724	ENSRNOG00000019965	Tgfb1i1	transforming growth factor beta 1 induced transcript 1 [Source:RGD Symbol;Acc:620173]
ENSRNOG00000017692	2979.69	-0.335738	0.0757167	-4.43414	9.24406e-06	9.13651e-05	ENSRNOG00000017692	Ppp1r37	protein phosphatase 1, regulatory subunit 37 [Source:RGD Symbol;Acc:1595870]
ENSRNOG00000017980	31.852	0.119783	0.379668	0.315495	0.752386	0.847212	ENSRNOG00000017980	Itgal	integrin subunit alpha L [Source:RGD Symbol;Acc:631424]
ENSRNOG00000016371	352.503	-0.000905594	0.120566	-0.00751118	0.994007	0.997332	ENSRNOG00000016371	Slc18b1	solute carrier family 18 member B1 [Source:RGD Symbol;Acc:1306962]
ENSRNOG00000019419	205.654	-0.180345	0.144522	-1.24787	0.212078	0.361741	ENSRNOG00000019419	Taf6l	TATA-box binding protein associated factor 6 like [Source:RGD Symbol;Acc:1310123]
ENSRNOG00000020552	177.798	-0.153526	0.159184	-0.964452	0.334819	0.49766	ENSRNOG00000020552	Fosl1	FOS like 1, AP-1 transcription factor subunit [Source:RGD Symbol;Acc:2627]
ENSRNOG00000018215	51.3822	-1.12748	0.291218	-3.8716	0.000108122	0.000779337	ENSRNOG00000018215	Slc22a6	solute carrier family 22 member 6 [Source:RGD Symbol;Acc:69338]
ENSRNOG00000047061	37.8671	0.28774	0.314744	0.914204	0.36061	0.523225	ENSRNOG00000047061	Zfp773-ps1	zinc finger protein 773, pseudogene 1 [Source:RGD Symbol;Acc:1563793]
ENSRNOG00000016627	292.287	0.499349	0.150752	3.31239	0.000925018	0.00480728	ENSRNOG00000016627	Eya4	EYA transcriptional coactivator and phosphatase 4 [Source:RGD Symbol;Acc:1307099]
ENSRNOG00000021828	1667.17	-0.206651	0.0626538	-3.29829	0.000972757	0.00501635	ENSRNOG00000021828	Coro1b	coronin 1B [Source:RGD Symbol;Acc:2382]
ENSRNOG00000022742	246.145	-0.130553	0.148001	-0.88211	0.377717	0.541011	ENSRNOG00000022742	Zfp954	zinc finger protein 954 [Source:RGD Symbol;Acc:1561308]
ENSRNOG00000016280	1382.47	0.0420426	0.0891792	0.47144	0.637327	0.763701	ENSRNOG00000016280	Btrc	beta-transducin repeat containing E3 ubiquitin protein ligase [Source:RGD Symbol;Acc:1359721]
ENSRNOG00000016883	71.9094	-0.245693	0.246385	-0.997193	0.318671	0.480604	ENSRNOG00000016883	Entpd7	ectonucleoside triphosphate diphosphohydrolase 7 [Source:RGD Symbol;Acc:1310638]
ENSRNOG00000024065	114.134	-0.701035	0.222611	-3.14915	0.00163747	0.00773575	ENSRNOG00000024065	Zfp575	zinc finger protein 575 [Source:RGD Symbol;Acc:1305025]
ENSRNOG00000012122	382.313	0.731355	0.130687	5.59623	2.19061e-08	4.28701e-07	ENSRNOG00000012122	Clvs2	clavesin 2 [Source:RGD Symbol;Acc:1306801]
ENSRNOG00000017412	66.4057	0.504125	0.362936	1.38902	0.164827	0.301525	ENSRNOG00000017412	AABR07001512.1
ENSRNOG00000013847	620.564	-0.0296719	0.110904	-0.267546	0.789049	0.870554	ENSRNOG00000013847	Nova2	NOVA alternative splicing regulator 2 [Source:RGD Symbol;Acc:1308032]
ENSRNOG00000059500	34.5945	-0.766014	0.335739	-2.28158	0.0225142	0.0650208	ENSRNOG00000059500	Cdkn1c	cyclin-dependent kinase inhibitor 1C [Source:RGD Symbol;Acc:727892]
ENSRNOG00000048495	461.231	-0.173126	0.095005	-1.82228	0.0684126	0.155092	ENSRNOG00000048495	Rrp12	ribosomal RNA processing 12 [Source:RGD Symbol;Acc:1591867]
ENSRNOG00000013323	359.999	0.20471	0.111079	1.84292	0.0653409	0.149512	ENSRNOG00000013323	Rnf217	ring finger protein 217 [Source:RGD Symbol;Acc:1306836]
ENSRNOG00000020388	1007.47	0.440713	0.102839	4.28548	1.82342e-05	0.000166395	ENSRNOG00000020388	Inpp5f	inositol polyphosphate-5-phosphatase F [Source:RGD Symbol;Acc:1305777]
ENSRNOG00000013965	366.596	-0.0243056	0.107925	-0.225207	0.821818	0.890846	ENSRNOG00000013965	Noc3l	NOC3-like DNA replication regulator [Source:RGD Symbol;Acc:1560656]
ENSRNOG00000029608	2645.4	0.289209	0.0792166	3.65086	0.000261361	0.00166503	ENSRNOG00000029608	Nkain2	sodium/potassium transporting ATPase interacting 2 [Source:RGD Symbol;Acc:7740967]
ENSRNOG00000017419	912.51	-0.225649	0.0763758	-2.95446	0.0031322	0.0133239	ENSRNOG00000017419	Map3k4	mitogen activated protein kinase kinase kinase 4 [Source:RGD Symbol;Acc:1311192]
ENSRNOG00000021102	12681.6	-0.270394	0.0802998	-3.3673	0.000759073	0.00405972	ENSRNOG00000021102	Scn1b	sodium voltage-gated channel beta subunit 1 [Source:RGD Symbol;Acc:3631]
ENSRNOG00000014928	2762.93	0.0930034	0.0558927	1.66396	0.0961194	0.20181	ENSRNOG00000014928	Apba1	amyloid beta precursor protein binding family A member 1 [Source:RGD Symbol;Acc:620844]
ENSRNOG00000015465	24.7722	0.175501	0.377746	0.4646	0.642218	0.766995	ENSRNOG00000015465	Cep72	centrosomal protein 72 [Source:RGD Symbol;Acc:1566336]
ENSRNOG00000014786	255.204	-0.149192	0.132372	-1.12707	0.259715	0.416258	ENSRNOG00000014786	Ccne1	cyclin E1 [Source:RGD Symbol;Acc:2294]
ENSRNOG00000019596	608.544	-0.238389	0.092979	-2.5639	0.0103502	0.03505	ENSRNOG00000019596	Smg9	SMG9 nonsense mediated mRNA decay factor [Source:RGD Symbol;Acc:1309888]
ENSRNOG00000017230	905.339	0.263843	0.0932774	2.82859	0.00467541	0.0184123	ENSRNOG00000017230	Cox15	cytochrome c oxidase assembly homolog COX15 [Source:RGD Symbol;Acc:1312043]
ENSRNOG00000014485	944.608	-0.221341	0.0869508	-2.54559	0.0109095	0.0365647	ENSRNOG00000014485	Pdcd6	programmed cell death 6 [Source:RGD Symbol;Acc:1311239]
ENSRNOG00000021098	233.218	-0.102827	0.135825	-0.757055	0.449017	0.606879	ENSRNOG00000021098	Rasgrp2	RAS guanyl releasing protein 2 [Source:RGD Symbol;Acc:1311630]
ENSRNOG00000051051	249.623	0.142108	0.145676	0.975508	0.329308	0.492154	ENSRNOG00000051051	Pabir1	PP2A Aalpha (PPP2R1A) and B55A (PPP2R2A) interacting phosphatase regulator 1 [Source:RGD Symbol;Acc:1310316]
ENSRNOG00000011584	367.276	0.0115704	0.114021	0.101476	0.919172	0.952618	ENSRNOG00000011584	Gpatch1	G patch domain containing 1 [Source:RGD Symbol;Acc:1308935]
ENSRNOG00000024243	4870.01	-0.265583	0.0592115	-4.48533	7.28004e-06	7.38914e-05	ENSRNOG00000024243	Cadm4	cell adhesion molecule 4 [Source:RGD Symbol;Acc:1304722]
ENSRNOG00000015912	2685.72	-0.133881	0.0548708	-2.43993	0.0146901	0.0463504	ENSRNOG00000015912	Ptdss2	phosphatidylserine synthase 2 [Source:RGD Symbol;Acc:1307914]
ENSRNOG00000020598	39.5719	0.0866311	0.32053	0.270274	0.786949	0.869282	ENSRNOG00000020598	Kcnk6	potassium two pore domain channel subfamily K member 6 [Source:RGD Symbol;Acc:621450]
ENSRNOG00000028247	1741.49	-0.0743447	0.0569324	-1.30584	0.191606	0.336404	ENSRNOG00000028247	Ankrd13d	ankyrin repeat domain 13D [Source:RGD Symbol;Acc:1309156]
ENSRNOG00000016434	208.943	-0.535466	0.177514	-3.01647	0.00255733	0.0111694	ENSRNOG00000016434	Prkd2	protein kinase D2 [Source:RGD Symbol;Acc:1308054]
ENSRNOG00000013331	7953.01	-0.0316839	0.0483356	-0.655499	0.512147	0.662007	ENSRNOG00000013331	Sdha	succinate dehydrogenase complex flavoprotein subunit A [Source:RGD Symbol;Acc:621557]
ENSRNOG00000036592	155.042	0.457105	0.184516	2.47732	0.0132374	0.0426833	ENSRNOG00000036592	Zfp518a	zinc finger protein 518A [Source:RGD Symbol;Acc:1305314]
ENSRNOG00000021067	1331.71	-0.431898	0.0907045	-4.76159	1.92074e-06	2.30819e-05	ENSRNOG00000021067	Fxyd7	FXYD domain-containing ion transport regulator 7 [Source:RGD Symbol;Acc:620830]
ENSRNOG00000021175	529.347	-0.421737	0.103209	-4.08625	4.38396e-05	0.000358948	ENSRNOG00000021175	Otub1	OTU deubiquitinase, ubiquitin aldehyde binding 1 [Source:RGD Symbol;Acc:1311329]
ENSRNOG00000018137	1007.51	-0.192549	0.072067	-2.6718	0.00754454	0.0272103	ENSRNOG00000018137	Tubgcp2	tubulin, gamma complex associated protein 2 [Source:RGD Symbol;Acc:1309597]
ENSRNOG00000021644	81.8789	-0.399569	0.251194	-1.59068	0.111682	0.225992	ENSRNOG00000021644	Slc15a3	solute carrier family 15 member 3 [Source:RGD Symbol;Acc:628663]
ENSRNOG00000014163	197.667	-0.146222	0.156767	-0.932732	0.350959	0.513851	ENSRNOG00000014163	Zfp536	zinc finger protein 536 [Source:RGD Symbol;Acc:1563363]
ENSRNOG00000057569	1518.27	-0.37606	0.122555	-3.06849	0.00215142	0.00968733	ENSRNOG00000057569	Ahnak	AHNAK nucleoprotein [Source:RGD Symbol;Acc:619779]
ENSRNOG00000019915	811.131	0.295642	0.0922669	3.2042	0.00135438	0.00663512	ENSRNOG00000019915	Xrcc1	X-ray repair cross complementing 1 [Source:RGD Symbol;Acc:619823]
ENSRNOG00000017164	361.855	-0.283847	0.123785	-2.29307	0.021844	0.0636228	ENSRNOG00000017164	Afap1l2	actin filament associated protein 1-like 2 [Source:RGD Symbol;Acc:1310668]
ENSRNOG00000020781	1114.01	-0.331876	0.08087	-4.10382	4.06388e-05	0.000335921	ENSRNOG00000020781	Tbcb	tubulin folding cofactor B [Source:RGD Symbol;Acc:1309965]
ENSRNOG00000021338	5616.72	-0.449691	0.0901372	-4.98896	6.07055e-07	8.36165e-06	ENSRNOG00000021338	Tmem132a	transmembrane protein 132A [Source:RGD Symbol;Acc:727936]
ENSRNOG00000032042	712.556	-0.01569	0.0930346	-0.168647	0.866074	0.91884	ENSRNOG00000032042	Zfta	zinc finger translocation associated [Source:RGD Symbol;Acc:1560108]
ENSRNOG00000014190	382.173	0.00828383	0.101817	0.0813601	0.935156	0.962374	ENSRNOG00000014190	Hint3	histidine triad nucleotide binding protein 3 [Source:RGD Symbol;Acc:621603]
ENSRNOG00000018985	7570.6	-0.175665	0.0610459	-2.87759	0.00400731	0.0162919	ENSRNOG00000018985	Grk2	G protein-coupled receptor kinase 2 [Source:RGD Symbol;Acc:2062]
ENSRNOG00000020799	223.121	-0.20985	0.145477	-1.44249	0.149163	0.279695	ENSRNOG00000020799	Polr2i	RNA polymerase II subunit I [Source:RGD Symbol;Acc:1309395]
ENSRNOG00000036641	33.5871	-0.15552	0.330476	-0.470594	0.637931	0.763988	ENSRNOG00000036641	LOC689065	RIKEN cDNA 2010003K11 gene [Source:MGI Symbol;Acc:MGI:1917111]
ENSRNOG00000022485	558.191	0.570921	0.117056	4.87734	1.07526e-06	1.3826e-05	ENSRNOG00000022485	Chuk	component of inhibitor of nuclear factor kappa B kinase complex [Source:RGD Symbol;Acc:1306661]
ENSRNOG00000069113	1470.16	-0.309816	0.0779007	-3.97706	6.97725e-05	0.000532976	ENSRNOG00000069113	Rpl26-ps2	ribosomal protein L26, pseudogene 2 [Source:RGD Symbol;Acc:1565215]
ENSRNOG00000066174	56.4532	0.584451	0.316044	1.84927	0.0644187	0.147839	ENSRNOG00000066174
ENSRNOG00000018272	260.043	-0.440585	0.130839	-3.36739	0.000758822	0.00405972	ENSRNOG00000018272	Zfp511	zinc finger protein 511 [Source:RGD Symbol;Acc:1308585]
ENSRNOG00000066988	56.708	0.591744	0.295859	2.00009	0.0454908	0.112936	ENSRNOG00000066988	Tbpl1	TATA-box binding protein like 1 [Source:RGD Symbol;Acc:1597456]
ENSRNOG00000024677	2983.95	-0.418171	0.0721277	-5.79765	6.72487e-09	1.4492e-07	ENSRNOG00000024677	Arhgap33	Rho GTPase activating protein 33 [Source:RGD Symbol;Acc:2318374]
ENSRNOG00000016416	828.552	-0.385762	0.0713576	-5.40605	6.44316e-08	1.1368e-06	ENSRNOG00000016416	Rnh1	ribonuclease/angiogenin inhibitor 1 [Source:RGD Symbol;Acc:621398]
ENSRNOG00000011114	50.745	1.99974	0.321332	6.22326	4.86925e-10	1.36832e-08	ENSRNOG00000011114	Tbpl1	TATA-box binding protein like 1 [Source:RGD Symbol;Acc:1597456]
ENSRNOG00000030572	734.246	0.572915	0.0903451	6.34141	2.27675e-10	6.94218e-09	ENSRNOG00000030572	Smc5	structural maintenance of chromosomes 5 [Source:RGD Symbol;Acc:1307492]
ENSRNOG00000017731	1190.62	-0.106499	0.0784502	-1.35754	0.174609	0.314451	ENSRNOG00000017731	Agpat4	1-acylglycerol-3-phosphate O-acyltransferase 4 [Source:RGD Symbol;Acc:619916]
ENSRNOG00000020689	1020.99	0.671727	0.106706	6.29511	3.07172e-10	9.02902e-09	ENSRNOG00000020689	Cpeb3	cytoplasmic polyadenylation element binding protein 3 [Source:RGD Symbol;Acc:1564670]
ENSRNOG00000021202	27628.6	0.0457525	0.052286	0.875044	0.38155	0.544693	ENSRNOG00000021202	Rtn3	reticulon 3 [Source:RGD Symbol;Acc:620988]
ENSRNOG00000011161	171.519	0.0546544	0.181189	0.301642	0.762925	0.853781	ENSRNOG00000011161	Slc2a12	solute carrier family 2 member 12 [Source:RGD Symbol;Acc:1310175]
ENSRNOG00000017298	160.284	-0.0762762	0.174786	-0.436399	0.662548	0.782	ENSRNOG00000017298	Cutc	cutC copper transporter [Source:RGD Symbol;Acc:1304966]
ENSRNOG00000013364	243.306	0.0738837	0.157557	0.468934	0.639117	0.765035	ENSRNOG00000013364	Hey2	hes-related family bHLH transcription factor with YRPW motif 2 [Source:RGD Symbol;Acc:621405]
ENSRNOG00000021137	420.078	-0.250526	0.0935942	-2.67672	0.00743465	0.0268667	ENSRNOG00000021137	Kctd15	potassium channel tetramerization domain containing 15 [Source:RGD Symbol;Acc:1583737]
ENSRNOG00000020480	6809.37	-0.399767	0.085434	-4.67925	2.87931e-06	3.29574e-05	ENSRNOG00000020480	Fads1	fatty acid desaturase 1 [Source:RGD Symbol;Acc:621678]
ENSRNOG00000011568	204.716	-0.0437678	0.17024	-0.257095	0.797106	0.875696	ENSRNOG00000011568	Rspo3	R-spondin 3 [Source:RGD Symbol;Acc:1563246]
ENSRNOG00000036598	367.748	0.468578	0.134559	3.48233	0.000497078	0.00285932	ENSRNOG00000036598	Tbc1d12	TBC1 domain family, member 12 [Source:RGD Symbol;Acc:9377071]
ENSRNOG00000014240	74.7382	-0.0819648	0.23336	-0.351238	0.72541	0.827423	ENSRNOG00000014240	Trmt11	tRNA methyltransferase 11 homolog [Source:RGD Symbol;Acc:727798]
ENSRNOG00000020394	393.33	-0.209424	0.0999955	-2.09434	0.03623	0.0948327	ENSRNOG00000020394	Mcmbp	minichromosome maintenance complex binding protein [Source:RGD Symbol;Acc:1306730]
ENSRNOG00000019968	2080.54	-0.343191	0.0775937	-4.42292	9.7377e-06	9.53655e-05	ENSRNOG00000019968	Trim8	tripartite motif-containing 8 [Source:RGD Symbol;Acc:1585223]
ENSRNOG00000063244	1842.18	-0.13402	0.397785	-0.336917	0.73618	0.835042	ENSRNOG00000063244	Mpeg1	macrophage expressed 1 [Source:RGD Symbol;Acc:69275]
ENSRNOG00000021144	1039.79	0.0758631	0.0645713	1.17487	0.240045	0.394934	ENSRNOG00000021144	Cebpg	CCAAT/enhancer binding protein gamma [Source:RGD Symbol;Acc:2330]
ENSRNOG00000011588	1144.72	0.183165	0.0821183	2.2305	0.0257141	0.0724674	ENSRNOG00000011588	Rnf146	ring finger protein 146 [Source:RGD Symbol;Acc:1306482]
ENSRNOG00000018337	2186.71	-0.0344562	0.0781691	-0.440791	0.659364	0.779729	ENSRNOG00000018337	Caly	calcyon neuron-specific vesicular protein [Source:RGD Symbol;Acc:621719]
ENSRNOG00000028017	670.721	-0.371804	0.0946772	-3.92707	8.59878e-05	0.000640204	ENSRNOG00000028017	Tmem109	transmembrane protein 109 [Source:RGD Symbol;Acc:1359538]
ENSRNOG00000020514	190.363	0.428962	0.149811	2.86336	0.00419178	0.0168924	ENSRNOG00000020514	Sox6	SRY-box transcription factor 6 [Source:RGD Symbol;Acc:1309000]
ENSRNOG00000018237	1935.46	-0.283644	0.0740525	-3.83031	0.000127979	0.000903416	ENSRNOG00000018237	Gstp1	glutathione S-transferase pi 1 [Source:RGD Symbol;Acc:2758]
ENSRNOG00000027724	71.6085	-0.610616	0.256335	-2.3821	0.0172142	0.0525873	ENSRNOG00000027724	Plekhf1	pleckstrin homology and FYVE domain containing 1 [Source:RGD Symbol;Acc:1310544]
ENSRNOG00000011622	981.202	0.13271	0.100417	1.32159	0.186305	0.329895	ENSRNOG00000011622	Echdc1	ethylmalonyl-CoA decarboxylase 1 [Source:RGD Symbol;Acc:1359654]
ENSRNOG00000019112	34.3782	-0.279868	0.370912	-0.754542	0.450524	0.608133	ENSRNOG00000019112	Chp2	calcineurin-like EF hand protein 2 [Source:RGD Symbol;Acc:727796]
ENSRNOG00000021119	109.161	-0.073365	0.191257	-0.383594	0.701279	0.810084	ENSRNOG00000021119	Pdcd2l	programmed cell death 2-like [Source:RGD Symbol;Acc:1589941]
ENSRNOG00000019311	93.2228	-0.625184	0.201813	-3.09785	0.00194932	0.0089222	ENSRNOG00000019311	Nfkb2	nuclear factor kappa B subunit 2 [Source:RGD Symbol;Acc:1307189]
ENSRNOG00000067490	26.2688	0.154584	0.421618	0.366645	0.713884	0.819144	ENSRNOG00000067490
ENSRNOG00000055547	153.659	0.154557	0.157493	0.981358	0.326416	0.488809	ENSRNOG00000055547	Prkn	parkin RBR E3 ubiquitin protein ligase [Source:RGD Symbol;Acc:61797]
ENSRNOG00000021086	490.346	-0.0803383	0.0986503	-0.814375	0.41543	0.577405	ENSRNOG00000021086	Dtx4	deltex E3 ubiquitin ligase 4 [Source:RGD Symbol;Acc:1311767]
ENSRNOG00000013938	1199.99	0.129787	0.0835672	1.55308	0.120403	0.239486	ENSRNOG00000013938	Tshz3	teashirt zinc finger homeobox 3 [Source:RGD Symbol;Acc:1306322]
ENSRNOG00000064485	65.9505	0.21026	0.243564	0.863262	0.387994	0.550578	ENSRNOG00000064485	Znf431l-ps8	zinc finger protein 431 like, pseudogene 8 [Source:RGD Symbol;Acc:7704592]
ENSRNOG00000019435	8913.97	-0.583124	0.070573	-8.26272	1.42395e-16	1.44329e-14	ENSRNOG00000019435	Psd	pleckstrin and Sec7 domain containing [Source:RGD Symbol;Acc:620297]
ENSRNOG00000024266	152.516	0.0511839	0.170629	0.299972	0.764198	0.85462	ENSRNOG00000024266	Haus5	HAUS augmin-like complex, subunit 5 [Source:RGD Symbol;Acc:2318093]
ENSRNOG00000017414	120.486	1.0304	0.277087	3.7187	0.000200253	0.00133415	ENSRNOG00000017414	Irf7	interferon regulatory factor 7 [Source:RGD Symbol;Acc:1307828]
ENSRNOG00000018860	260.195	-0.116252	0.157569	-0.737787	0.460644	0.617089	ENSRNOG00000018860	Mtg1	mitochondrial ribosome-associated GTPase 1 [Source:RGD Symbol;Acc:6497155]
ENSRNOG00000016960	658.819	0.0487927	0.0818753	0.595939	0.551216	0.694608	ENSRNOG00000016960	Polr3e	RNA polymerase III subunit E [Source:RGD Symbol;Acc:1308086]
ENSRNOG00000042309	1657.48	0.531225	0.0714231	7.43771	1.02443e-13	6.35277e-12	ENSRNOG00000042309	Kiaa0408L	Kiaa0408-like [Source:RGD Symbol;Acc:1307525]
ENSRNOG00000019509	237.885	-0.505952	0.163946	-3.08609	0.00202808	0.00920545	ENSRNOG00000019509	Fbxl15	F-box and leucine-rich repeat protein 15 [Source:RGD Symbol;Acc:1306444]
ENSRNOG00000016166	56.445	-0.212737	0.279691	-0.760614	0.446887	0.605579	ENSRNOG00000016166	Pdlim1	PDZ and LIM domain 1 [Source:RGD Symbol;Acc:68324]
ENSRNOG00000012324	846.559	0.112864	0.117923	0.957102	0.338516	0.501377	ENSRNOG00000012324	Soga3	SOGA family member 3 [Source:RGD Symbol;Acc:11479453]
ENSRNOG00000019574	127.491	-0.29824	0.179051	-1.66567	0.09578	0.20127	ENSRNOG00000019574	Cuedc2	CUE domain containing 2 [Source:RGD Symbol;Acc:1308096]
ENSRNOG00000017396	1380.63	0.301426	0.0764714	3.94169	8.09105e-05	0.000605448	ENSRNOG00000017396	Marchf5	membrane associated ring-CH-type finger 5 [Source:RGD Symbol;Acc:1305617]
ENSRNOG00000028261	2233.02	-0.102263	0.092617	-1.10415	0.26953	0.426985	ENSRNOG00000028261	Tppp	tubulin polymerization promoting protein [Source:RGD Symbol;Acc:1310121]
ENSRNOG00000020985	25.9449	0.209324	0.477215	0.438636	0.660925	0.780586	ENSRNOG00000020985	Atp4a	ATPase H+/K+ transporting subunit alpha [Source:RGD Symbol;Acc:2177]
ENSRNOG00000067971	2969.82	-0.144372	0.0739563	-1.95213	0.0509234	0.123055	ENSRNOG00000067971	Sprn	shadow of prion protein [Source:RGD Symbol;Acc:1561845]
ENSRNOG00000013971	4153.06	-0.255084	0.0741746	-3.43896	0.000583954	0.00327072	ENSRNOG00000013971	Psat1	phosphoserine aminotransferase 1 [Source:RGD Symbol;Acc:735170]
ENSRNOG00000021054	1132.82	-0.0390472	0.0742193	-0.526106	0.598815	0.734746	ENSRNOG00000021054	Men1	menin 1 [Source:RGD Symbol;Acc:3078]
ENSRNOG00000025353	92.6813	0.393371	0.225161	1.74706	0.0806261	0.17636	ENSRNOG00000025353	Ears2	glutamyl-tRNA synthetase 2, mitochondrial [Source:RGD Symbol;Acc:1307904]
ENSRNOG00000019936	551.575	-0.0925808	0.0853997	-1.08409	0.278326	0.436046	ENSRNOG00000019936	Anapc15	anaphase promoting complex subunit 15 [Source:RGD Symbol;Acc:1311634]
ENSRNOG00000021156	678.245	-0.364235	0.0916627	-3.97365	7.07808e-05	0.000539457	ENSRNOG00000021156	Vegfb	vascular endothelial growth factor B [Source:RGD Symbol;Acc:619799]
ENSRNOG00000028357	75.634	0.202009	0.237873	0.849231	0.395752	0.558914	ENSRNOG00000028357	Lrrc14b	leucine rich repeat containing 14B [Source:RGD Symbol;Acc:1564978]
ENSRNOG00000066093	854.061	0.270642	0.105482	2.56575	0.0102953	0.0349202	ENSRNOG00000066093	Ccdc127	coiled-coil domain containing 127 [Source:RGD Symbol;Acc:735106]
ENSRNOG00000015051	1006.89	-0.479825	0.0735032	-6.52795	6.66766e-11	2.32215e-09	ENSRNOG00000015051	Golga7b	golgin A7 family, member B [Source:RGD Symbol;Acc:1583839]
ENSRNOG00000021061	1233.4	0.223955	0.0778854	2.87544	0.00403468	0.0163693	ENSRNOG00000021061	Map4k2	mitogen activated protein kinase kinase kinase kinase 2 [Source:RGD Symbol;Acc:1308199]
ENSRNOG00000014966	633.835	0.21874	0.0895738	2.44201	0.0146056	0.0461433	ENSRNOG00000014966	LOC690000	similar to CG3740-PA [Source:RGD Symbol;Acc:1585208]
ENSRNOG00000020016	1597.53	-0.136202	0.0660442	-2.06229	0.0391801	0.100722	ENSRNOG00000020016	Lamtor1	RhoA activator C11orf59-like [Source:RGD Symbol;Acc:2319924]
ENSRNOG00000025327	47.8059	0.317419	0.28627	1.10881	0.267512	0.424582	ENSRNOG00000025327	Tert	telomerase reverse transcriptase [Source:RGD Symbol;Acc:70494]
ENSRNOG00000063986	43.1389	1.07305	0.377551	2.84212	0.00448143	0.0178106	ENSRNOG00000063986
ENSRNOG00000015220	1366.19	-0.0196336	0.0900331	-0.218071	0.827374	0.894243	ENSRNOG00000015220	Crtac1	cartilage acidic protein 1 [Source:RGD Symbol;Acc:621085]
ENSRNOG00000020124	33.112	-0.208836	0.342105	-0.610443	0.541568	0.687343	ENSRNOG00000020124	Lrrc51	leucine rich repeat containing 51 [Source:RGD Symbol;Acc:1565856]
ENSRNOG00000062358	38.925	0.4262	0.507857	0.839212	0.40135	0.563704	ENSRNOG00000062358	Lilrb3l	leukocyte immunoglobulin like receptor B3 like [Source:RGD Symbol;Acc:1307219]
ENSRNOG00000062531	1334.68	-0.329664	0.0792247	-4.16112	3.16684e-05	0.000269971	ENSRNOG00000062531	Ndufs6l1	NADH:ubiquinone oxidoreductase subunit S6-like 1 [Source:RGD Symbol;Acc:1584802]
ENSRNOG00000020646	1562.23	-0.0221157	0.0802875	-0.275457	0.782965	0.866705	ENSRNOG00000020646	Sdhaf2	succinate dehydrogenase complex assembly factor 2 [Source:RGD Symbol;Acc:1309216]
ENSRNOG00000043060	355.92	0.126557	0.108369	1.16783	0.242875	0.398118	ENSRNOG00000043060	Dnajc4	DnaJ heat shock protein family (Hsp40) member C4 [Source:RGD Symbol;Acc:1308693]
ENSRNOG00000017938	840.731	0.2109	0.101286	2.08222	0.0373223	0.0968599	ENSRNOG00000017938	Btaf1	B-TFIID TATA-box binding protein associated factor 1 [Source:RGD Symbol;Acc:1564130]
ENSRNOG00000039776	1040.2	-0.144627	0.0724062	-1.99743	0.045778	0.113476	ENSRNOG00000039776	Exoc3	exocyst complex component 3 [Source:RGD Symbol;Acc:621790]
ENSRNOG00000053659	2043.37	0.0169964	0.0655859	0.259147	0.795522	0.874675	ENSRNOG00000053659	C1h11orf58	similar to human chromosome 11 open reading frame 58 [Source:RGD Symbol;Acc:1311703]
ENSRNOG00000000417	1852.49	-0.0898647	0.0750953	-1.19668	0.231433	0.384777	ENSRNOG00000000417	Numa1	nuclear mitotic apparatus protein 1 [Source:RGD Symbol;Acc:1308777]
ENSRNOG00000018243	990.904	0.148916	0.0856555	1.73854	0.0821153	0.178877	ENSRNOG00000018243	Ubfd1	ubiquitin family domain containing 1 [Source:RGD Symbol;Acc:1306614]
ENSRNOG00000015159	24.3911	0.556639	0.417206	1.33421	0.182137	0.324704	ENSRNOG00000015159	Slc9a3	solute carrier family 9 member A3 [Source:RGD Symbol;Acc:3720]
ENSRNOG00000015213	463.259	-0.234948	0.113918	-2.06243	0.039167	0.100706	ENSRNOG00000015213	Fxn	frataxin [Source:RGD Symbol;Acc:1565754]
ENSRNOG00000027590	607.992	0.284417	0.090311	3.14931	0.00163656	0.00773575	ENSRNOG00000027590	Jakmip3	janus kinase and microtubule interacting protein 3 [Source:RGD Symbol;Acc:1307177]
ENSRNOG00000021203	353.79	0.52672	0.12611	4.17668	2.95794e-05	0.00025393	ENSRNOG00000021203	Atl3	atlastin GTPase 3 [Source:RGD Symbol;Acc:1309871]
ENSRNOG00000020150	83.295	0.157739	0.224107	0.703855	0.481523	0.635787	ENSRNOG00000020150	Il18bp	interleukin 18 binding protein [Source:RGD Symbol;Acc:620042]
ENSRNOG00000019570	3195.95	-0.27232	0.0640145	-4.25404	2.09951e-05	0.000188379	ENSRNOG00000019570	Gng3	G protein subunit gamma 3 [Source:RGD Symbol;Acc:620805]
ENSRNOG00000021006	490.342	0.0132628	0.11017	0.120385	0.904178	0.943733	ENSRNOG00000021006	Tmem147	transmembrane protein 147 [Source:RGD Symbol;Acc:1304706]
ENSRNOG00000068261	63.1036	-0.0693741	0.240945	-0.287926	0.773404	0.860697	ENSRNOG00000068261	Pacrg	parkin coregulated [Source:RGD Symbol;Acc:1561027]
ENSRNOG00000020009	287.574	1.07865	0.506155	2.13107	0.0330834	0.0881164	ENSRNOG00000020009	Npas4	neuronal PAS domain protein 4 [Source:RGD Symbol;Acc:628866]
ENSRNOG00000037380	186.688	0.132254	0.148812	0.888731	0.374148	0.537365	ENSRNOG00000037380	AC136661.1
ENSRNOG00000020175	319.285	-0.0126853	0.140999	-0.0899673	0.928313	0.958082	ENSRNOG00000020175	Rnf121	ring finger protein 121 [Source:RGD Symbol;Acc:1307857]
ENSRNOG00000018476	330.795	-0.00439583	0.11825	-0.0371739	0.970346	0.983597	ENSRNOG00000018476	Fuom	fucose mutarotase [Source:RGD Symbol;Acc:1311186]
ENSRNOG00000052393	1612.45	-0.192456	0.0885228	-2.17408	0.0296992	0.0810564	ENSRNOG00000052393	Bscl2	BSCL2 lipid droplet biogenesis associated, seipin [Source:RGD Symbol;Acc:1308135]
ENSRNOG00000048297	3958.86	0.441776	0.0790566	5.5881	2.29562e-08	4.47464e-07	ENSRNOG00000048297	Qki	QKI, KH domain containing RNA binding [Source:RGD Symbol;Acc:1584886]
ENSRNOG00000021164	3527.14	-0.202871	0.0690086	-2.9398	0.00328425	0.0138345	ENSRNOG00000021164	Stip1	stress-induced phosphoprotein 1 [Source:RGD Symbol;Acc:621599]
ENSRNOG00000020188	140.808	-0.416701	0.183886	-2.26608	0.0234466	0.0672512	ENSRNOG00000020188	Trpc2	transient receptor potential cation channel subfamily C member 2 [Source:RGD Symbol;Acc:628819]
ENSRNOG00000021009	115.258	-0.157032	0.203657	-0.77106	0.440671	0.600737	ENSRNOG00000021009	Gapdhs	glyceraldehyde-3-phosphate dehydrogenase, spermatogenic [Source:RGD Symbol;Acc:620150]
ENSRNOG00000015676	1012.75	0.0239805	0.0767949	0.312267	0.754838	0.848696	ENSRNOG00000015676	Brd9	bromodomain containing 9 [Source:RGD Symbol;Acc:1307359]
ENSRNOG00000018827	182.982	0.259437	0.174941	1.483	0.138075	0.264126	ENSRNOG00000018827	Htr7	5-hydroxytryptamine receptor 7 [Source:RGD Symbol;Acc:71034]
ENSRNOG00000018129	1313.77	-0.297369	0.0730207	-4.07239	4.6534e-05	0.000377643	ENSRNOG00000018129	Ndufab1	NADH:ubiquinone oxidoreductase subunit AB1 [Source:RGD Symbol;Acc:1305619]
ENSRNOG00000021015	69.5227	-0.169997	0.278258	-0.610933	0.541244	0.68699	ENSRNOG00000021015	Sbsn	suprabasin [Source:RGD Symbol;Acc:1562305]
ENSRNOG00000020668	1567.92	0.157762	0.0723399	2.18085	0.0291946	0.0799912	ENSRNOG00000020668	Cpsf7	cleavage and polyadenylation specific factor 7 [Source:RGD Symbol;Acc:1305441]
ENSRNOG00000014037	37.0581	0.313147	0.316609	0.989062	0.322633	0.484815	ENSRNOG00000014037	Dcun1d3	defective in cullin neddylation 1 domain containing 3 [Source:RGD Symbol;Acc:1308893]
ENSRNOG00000013443	2556.75	0.347813	0.0680448	5.11153	3.19561e-07	4.72494e-06	ENSRNOG00000013443	Tm9sf3	transmembrane 9 superfamily member 3 [Source:RGD Symbol;Acc:1564625]
ENSRNOG00000019302	933.153	-0.149578	0.0829012	-1.8043	0.0711849	0.160215	ENSRNOG00000019302	Stx4	syntaxin 4 [Source:RGD Symbol;Acc:621019]
ENSRNOG00000021079	644.925	-0.169745	0.106672	-1.59128	0.111547	0.225816	ENSRNOG00000021079	Fxyd1	FXYD domain-containing ion transport regulator 1 [Source:RGD Symbol;Acc:69306]
ENSRNOG00000069673	593.736	-0.333753	0.10661	-3.13061	0.00174446	0.00812366	ENSRNOG00000069673	Pnpla2	patatin-like phospholipase domain containing 2 [Source:RGD Symbol;Acc:1309044]
ENSRNOG00000021158	205.66	-0.094401	0.15767	-0.598723	0.549357	0.693456	ENSRNOG00000021158	Nudt22	nudix hydrolase 22 [Source:RGD Symbol;Acc:735224]
ENSRNOG00000021087	2469.73	-0.296207	0.0966474	-3.06482	0.00217799	0.00979198	ENSRNOG00000021087	Lgi4	leucine-rich repeat LGI family, member 4 [Source:RGD Symbol;Acc:735035]
ENSRNOG00000017469	56.1733	-0.638105	0.294322	-2.16805	0.0301546	0.0821533	ENSRNOG00000017469	Anxa1	annexin A1 [Source:RGD Symbol;Acc:2118]
ENSRNOG00000011310	794.33	0.732883	0.125801	5.82575	5.6855e-09	1.24902e-07	ENSRNOG00000011310	Pde10a	phosphodiesterase 10A [Source:RGD Symbol;Acc:68434]
ENSRNOG00000023023	114.09	0.113171	0.199615	0.566944	0.570752	0.71045	ENSRNOG00000023023	Trpt1	tRNA phosphotransferase 1 [Source:RGD Symbol;Acc:1310831]
ENSRNOG00000021161	75.7372	-0.17641	0.228228	-0.772955	0.439549	0.599763	ENSRNOG00000021161	Fermt3	FERM domain containing kindlin 3 [Source:RGD Symbol;Acc:1310168]
ENSRNOG00000014463	985.631	0.202499	0.0701895	2.88504	0.00391367	0.0159642	ENSRNOG00000014463	Uri1	URI1, prefoldin-like chaperone [Source:RGD Symbol;Acc:1310358]
ENSRNOG00000018367	1669.88	-0.276524	0.0672845	-4.10977	3.96046e-05	0.000328482	ENSRNOG00000018367	Taldo1	transaldolase 1 [Source:RGD Symbol;Acc:620674]
ENSRNOG00000015321	885.36	-0.117531	0.1074	-1.09432	0.273813	0.431692	ENSRNOG00000015321	Moxd1	monooxygenase, DBH-like 1 [Source:RGD Symbol;Acc:1310033]
ENSRNOG00000027646	677.85	-0.177628	0.0903864	-1.96521	0.04939	0.12013	ENSRNOG00000027646	Pop4	POP4 homolog, ribonuclease P/MRP subunit [Source:RGD Symbol;Acc:1305955]
ENSRNOG00000011885	212.837	-0.146728	0.159916	-0.917534	0.358863	0.521373	ENSRNOG00000011885	Rhpn2	rhophilin, Rho GTPase binding protein 2 [Source:RGD Symbol;Acc:1308366]
ENSRNOG00000019807	410.227	-0.15832	0.104668	-1.5126	0.130381	0.253509	ENSRNOG00000019807	Sufu	SUFU negative regulator of hedgehog signaling [Source:RGD Symbol;Acc:1559462]
ENSRNOG00000070586	481.263	-0.191423	0.120625	-1.58693	0.112529	0.22727	ENSRNOG00000070586	Prr18	proline rich 18 [Source:RGD Symbol;Acc:1564079]
ENSRNOG00000033517	203.575	-1.13164	0.859352	-1.31685	0.18789	0.331821	ENSRNOG00000033517	LOC100360791	tumor protein, translationally-controlled 1 [Source:RGD Symbol;Acc:2321467]
ENSRNOG00000060849	402.9	-0.338061	0.109196	-3.09593	0.001962	0.008967	ENSRNOG00000060849	Rcor2l1	REST corepressor 2 [Source:RGD Symbol;Acc:1359467]
ENSRNOG00000052814	964.421	0.116489	0.0791852	1.47109	0.141266	0.268971	ENSRNOG00000052814	Ankrd27	ankyrin repeat domain 27 [Source:RGD Symbol;Acc:1307106]
ENSRNOG00000024140	438.6	0.0295131	0.104626	0.282082	0.777881	0.863222	ENSRNOG00000024140	Sft2d1	SFT2 domain containing 1 [Source:RGD Symbol;Acc:1359119]
ENSRNOG00000024620	38.4773	-0.341627	0.322665	-1.05877	0.289705	0.448945	ENSRNOG00000024620	Mamdc2	MAM domain containing 2 [Source:RGD Symbol;Acc:1305129]
ENSRNOG00000068524	42.8526	-0.563064	0.348036	-1.61783	0.105699	0.216631	ENSRNOG00000068524	LOC108349831	40S ribosomal protein S29 pseudogene [Source:RGD Symbol;Acc:11452897]
ENSRNOG00000012415	2777.74	0.204588	0.0641343	3.19	0.00142274	0.0068896	ENSRNOG00000012415	Mpc1	mitochondrial pyruvate carrier 1 [Source:RGD Symbol;Acc:620902]
ENSRNOG00000022393	73.8749	-0.21838	0.227843	-0.958469	0.337826	0.500668	ENSRNOG00000022393	Faap24	FA core complex associated protein 24 [Source:RGD Symbol;Acc:1564719]
ENSRNOG00000013309	111.324	0.186703	0.237441	0.786312	0.431685	0.592775	ENSRNOG00000013309	Pik3ap1	phosphoinositide-3-kinase adaptor protein 1 [Source:RGD Symbol;Acc:1307744]
ENSRNOG00000021129	786.955	-0.055921	0.0854251	-0.65462	0.512713	0.662389	ENSRNOG00000021129	Garre1	granule associated Rac and RHOG effector 1 [Source:RGD Symbol;Acc:1308428]
ENSRNOG00000013053	29.034	-0.0908158	0.392968	-0.231102	0.817235	0.888315	ENSRNOG00000013053	Trpm6	transient receptor potential cation channel, subfamily M, member 6 [Source:RGD Symbol;Acc:1309942]
ENSRNOG00000065068	276.404	0.217539	0.119152	1.82573	0.0678914	0.154148	ENSRNOG00000065068	LOC100912659	zinc finger protein 709-like [Source:RGD Symbol;Acc:6485855]
ENSRNOG00000016930	1463.46	-0.226097	0.0749244	-3.01766	0.00254734	0.011139	ENSRNOG00000016930	Ube2s	ubiquitin-conjugating enzyme E2S [Source:RGD Symbol;Acc:1564746]
ENSRNOG00000029336	6884.86	-0.139749	0.0602696	-2.31873	0.0204096	0.0604028	ENSRNOG00000029336	Zfp180	zinc finger protein 180 [Source:RGD Symbol;Acc:631380]
ENSRNOG00000038600	41.8727	0.0120165	0.302514	0.0397223	0.968315	0.98287	ENSRNOG00000038600	Dnaaf3	dynein, axonemal, assembly factor 3 [Source:RGD Symbol;Acc:2323487]
ENSRNOG00000029022	148.88	-0.211647	0.171557	-1.23368	0.217321	0.367926	ENSRNOG00000029022	Zfp112	zinc finger protein 112 [Source:RGD Symbol;Acc:1305757]
ENSRNOG00000021184	2360.16	-0.185739	0.0718303	-2.5858	0.00971539	0.0333094	ENSRNOG00000021184	Mark2	microtubule affinity regulating kinase 2 [Source:RGD Symbol;Acc:708483]
ENSRNOG00000012847	24.4796	0.350627	0.433369	0.809072	0.418474	0.580108	ENSRNOG00000012847	Scgb1c1	secretoglobin, family 1C, member 1 [Source:RGD Symbol;Acc:1561432]
ENSRNOG00000065539	18.7871	0.36136	0.458509	0.78812	0.430627	0.591709	ENSRNOG00000065539	Mob1a-ps1	MOB kinase activator 1A, pseudogene 1 [Source:RGD Symbol;Acc:1590598]
ENSRNOG00000012858	20.2806	-0.053454	0.430811	-0.124078	0.901254	0.941943	ENSRNOG00000012858	Odf3	outer dense fiber of sperm tails 3 [Source:RGD Symbol;Acc:1310028]
ENSRNOG00000051237	68.2049	0.714239	0.261238	2.73405	0.00625602	0.0233897	ENSRNOG00000051237	Marf1-ps1	meiosis regulator and mRNA stability factor 1, pseudogene 1 [Source:RGD Symbol;Acc:1597141]
ENSRNOG00000033173	21.3699	0.0129792	0.446529	0.0290669	0.976811	0.987135	ENSRNOG00000033173	Garin5b	golgi associated RAB2 interactor family member 5B [Source:RGD Symbol;Acc:1310169]
ENSRNOG00000068100	145.591	-0.131969	0.178534	-0.739181	0.459797	0.61646	ENSRNOG00000068100	Zfp235	zinc finger protein 235 [Source:RGD Symbol;Acc:150345771]
ENSRNOG00000020884	76.5018	0.189008	0.235088	0.803988	0.421404	0.58307	ENSRNOG00000020884	Cd6	Cd6 molecule [Source:RGD Symbol;Acc:2312]
ENSRNOG00000024376	248.634	-0.467732	0.1365	-3.42661	0.000611176	0.00339473	ENSRNOG00000024376	Zfp111	zinc finger protein 111 [Source:RGD Symbol;Acc:620595]
ENSRNOG00000066415	54.0605	0.42225	0.302847	1.39427	0.163236	0.299213	ENSRNOG00000066415
ENSRNOG00000063144	115.286	-0.239095	0.191122	-1.25101	0.210932	0.360431	ENSRNOG00000063144	Znf235-ps1	zinc finger protein 235, pseudogene 1 [Source:RGD Symbol;Acc:7498933]
ENSRNOG00000020020	1522.01	-0.13596	0.0670139	-2.02883	0.0424761	0.107263	ENSRNOG00000020020	Wbp1l	WW domain binding protein 1-like [Source:RGD Symbol;Acc:1305793]
ENSRNOG00000071050	22.2176	-0.148616	0.431832	-0.344153	0.730731	0.831364	ENSRNOG00000071050	LOC102555644	zinc finger protein 182-like [Source:RGD Symbol;Acc:7699783]
ENSRNOG00000052945	1016.19	-0.372465	0.0766528	-4.85912	1.1791e-06	1.49778e-05	ENSRNOG00000052945	Pepd	peptidase D [Source:RGD Symbol;Acc:1594571]
ENSRNOG00000046439	473.465	-0.137875	0.113111	-1.21893	0.222871	0.374604	ENSRNOG00000046439	Vps37c	VPS37C subunit of ESCRT-I [Source:RGD Symbol;Acc:11384366]
ENSRNOG00000010967	1287.73	0.175108	0.0815735	2.14663	0.0318231	0.0857073	ENSRNOG00000010967	Cdc37l1	cell division cycle 37-like 1 [Source:RGD Symbol;Acc:1309295]
ENSRNOG00000062629	87.2138	1.17767	0.232792	5.05891	4.21665e-07	6.01855e-06	ENSRNOG00000062629	Zfp420-ps2	zinc finger protein 420, pseudogene 2 [Source:RGD Symbol;Acc:7577345]
ENSRNOG00000016218	2651.2	-0.007613	0.0667521	-0.114049	0.909199	0.946622	ENSRNOG00000016218	Gtf3c1	general transcription factor IIIC subunit 1 [Source:RGD Symbol;Acc:621048]
ENSRNOG00000033146	248.61	-0.279421	0.133309	-2.09604	0.0360784	0.094585	ENSRNOG00000033146	LOC100360843	ribosomal protein S19-like [Source:RGD Symbol;Acc:2321315]
ENSRNOG00000017804	48.3875	-0.0727531	0.277003	-0.262644	0.792825	0.873213	ENSRNOG00000017804	Septin1	septin 1 [Source:RGD Symbol;Acc:1307216]
ENSRNOG00000017299	1148.81	-0.109652	0.0731289	-1.49944	0.13376	0.258089	ENSRNOG00000017299	Phrf1	PHD and ring finger domains 1 [Source:RGD Symbol;Acc:708360]
ENSRNOG00000016274	242.431	-0.206642	0.139772	-1.47842	0.139294	0.265975	ENSRNOG00000016274	Zfp580	zinc finger protein 580 [Source:RGD Symbol;Acc:1306892]
ENSRNOG00000016023	586.883	-0.109162	0.120217	-0.908043	0.363856	0.526545	ENSRNOG00000016023	Kank1	KN motif and ankyrin repeat domains 1 [Source:RGD Symbol;Acc:1307714]
ENSRNOG00000016829	197.91	0.0514605	0.151372	0.339961	0.733886	0.833662	ENSRNOG00000016829	Isoc2a	isochorismatase domain containing 2b [Source:RGD Symbol;Acc:1309062]
ENSRNOG00000013165	465.53	-0.186542	0.091446	-2.03991	0.041359	0.105056	ENSRNOG00000013165	Bet1l	Bet1 golgi vesicular membrane trafficking protein-like [Source:RGD Symbol;Acc:71051]
ENSRNOG00000016877	2385.8	-0.0688041	0.0771284	-0.892072	0.372354	0.535678	ENSRNOG00000016877	Shisa7	shisa family member 7 [Source:RGD Symbol;Acc:1583944]
ENSRNOG00000015442	1894.19	0.0924663	0.0620296	1.49068	0.136045	0.261218	ENSRNOG00000015442	Sfxn3	sideroflexin 3 [Source:RGD Symbol;Acc:620716]
ENSRNOG00000017810	211.807	-0.257732	0.137579	-1.87334	0.0610211	0.141701	ENSRNOG00000017810	Uros	uroporphyrinogen III synthase [Source:RGD Symbol;Acc:1310396]
ENSRNOG00000015491	319.358	0.0605334	0.14063	0.430446	0.666871	0.785463	ENSRNOG00000015491	Rcl1	RNA terminal phosphate cyclase-like 1 [Source:RGD Symbol;Acc:1305320]
ENSRNOG00000050348	314.496	-0.142586	0.125778	-1.13363	0.25695	0.413157	ENSRNOG00000050348	Isoc2a	isochorismatase domain containing 2A [Source:RGD Symbol;Acc:1592677]
ENSRNOG00000017127	3980.15	-0.189836	0.0529005	-3.58855	0.000332525	0.00204311	ENSRNOG00000017127	Rpl28	ribosomal protein L28 [Source:RGD Symbol;Acc:621193]
ENSRNOG00000017837	464.327	-0.1808	0.111147	-1.62668	0.103806	0.213615	ENSRNOG00000017837	Znf48	zinc finger protein 48 [Source:RGD Symbol;Acc:9115869]
ENSRNOG00000053828	2711.4	-0.0899078	0.0637074	-1.41126	0.158168	0.292071	ENSRNOG00000053828	Ppp1r12c	protein phosphatase 1, regulatory subunit 12C [Source:RGD Symbol;Acc:1584883]
ENSRNOG00000052506	876.61	-0.274634	0.0857951	-3.20105	0.00136928	0.00668806	ENSRNOG00000052506	Ak3	adenylate kinase 3 [Source:RGD Symbol;Acc:619885]
ENSRNOG00000025061	299.522	-0.223126	0.115746	-1.92772	0.0538898	0.1287	ENSRNOG00000025061	Spindoc	spindlin interactor and repressor of chromatin binding [Source:RGD Symbol;Acc:1308106]
ENSRNOG00000013813	140.668	-0.509611	0.197162	-2.58473	0.00974552	0.0333558	ENSRNOG00000013813	Ubtd1	ubiquitin domain containing 1 [Source:RGD Symbol;Acc:1308172]
ENSRNOG00000027942	24.6625	0.40431	0.362743	1.11459	0.265026	0.422032	ENSRNOG00000027942	Eps8l1	EPS8-like 1 [Source:RGD Symbol;Acc:1311146]
ENSRNOG00000012156	539.063	-0.239214	0.0896537	-2.6682	0.00762579	0.027436	ENSRNOG00000012156	Ostf1	osteoclast stimulating factor 1 [Source:RGD Symbol;Acc:628849]
ENSRNOG00000020723	1619.08	0.461382	0.0674291	6.84247	7.78371e-12	3.41484e-10	ENSRNOG00000020723	Pten	phosphatase and tensin homolog [Source:RGD Symbol;Acc:61995]
ENSRNOG00000020857	1058.16	0.17207	0.0743057	2.31571	0.0205742	0.0607796	ENSRNOG00000020857	Ppfia1	PTPRF interacting protein alpha 1 [Source:RGD Symbol;Acc:1309009]
ENSRNOG00000012665	213.948	-0.0267139	0.134808	-0.198162	0.842918	0.904392	ENSRNOG00000012665	Nmrk1	nicotinamide riboside kinase 1 [Source:RGD Symbol;Acc:1564687]
ENSRNOG00000018708	1707.03	-0.223552	0.0736724	-3.03441	0.00241009	0.0106562	ENSRNOG00000018708	Ppp1ca	protein phosphatase 1 catalytic subunit alpha [Source:RGD Symbol;Acc:3375]
ENSRNOG00000038622	230.082	-0.117205	0.163371	-0.717416	0.473117	0.628244	ENSRNOG00000038622	Nat14	N-acetyltransferase 14 [Source:RGD Symbol;Acc:1565991]
ENSRNOG00000018561	573.911	-0.00353246	0.0982267	-0.0359623	0.971312	0.98417	ENSRNOG00000018561	Pprc1	PPARG related coactivator 1 [Source:RGD Symbol;Acc:1309688]
ENSRNOG00000067958	33.4879	-0.985811	0.321963	-3.06187	0.00219958	0.00987091	ENSRNOG00000067958	Nat14	N-acetyltransferase 14 [Source:RGD Symbol;Acc:1565991]
ENSRNOG00000016302	2137.4	-0.218156	0.0706888	-3.08615	0.00202768	0.00920545	ENSRNOG00000016302	Cnnm1	cyclin and CBS domain divalent metal cation transport mediator 1 [Source:RGD Symbol;Acc:1308728]
ENSRNOG00000017872	2783.28	-0.130266	0.0994292	-1.31014	0.19015	0.334687	ENSRNOG00000017872	Aldh3b3	aldehyde dehydrogenase family 3 member B3 [Source:RGD Symbol;Acc:41285163]
ENSRNOG00000056753	551.692	0.727373	0.130667	5.5666	2.59758e-08	4.99042e-07	ENSRNOG00000056753	Hectd2	HECT domain E3 ubiquitin protein ligase 2 [Source:RGD Symbol;Acc:1305536]
ENSRNOG00000069605	160.936	-0.0739202	0.185421	-0.398662	0.690142	0.801705	ENSRNOG00000069605	Leng9	leukocyte receptor cluster member 9 [Source:RGD Symbol;Acc:6488215]
ENSRNOG00000018729	269.592	0.0782191	0.116334	0.672368	0.50135	0.653101	ENSRNOG00000018729	Rad9a	RAD9 checkpoint clamp component A [Source:RGD Symbol;Acc:2319938]
ENSRNOG00000018642	1041.4	0.845542	0.135411	6.24427	4.2579e-10	1.21276e-08	ENSRNOG00000018642	Leng8	leukocyte receptor cluster member 8 [Source:RGD Symbol;Acc:1306180]
ENSRNOG00000013256	1353.64	-0.0730406	0.067139	-1.0879	0.276639	0.434655	ENSRNOG00000013256	Ric8a	RIC8 guanine nucleotide exchange factor A [Source:RGD Symbol;Acc:727957]
ENSRNOG00000018718	359.152	0.157918	0.118961	1.32748	0.184351	0.327184	ENSRNOG00000018718	Rpp30	ribonuclease P/MRP subunit p30 [Source:RGD Symbol;Acc:1595116]
ENSRNOG00000061147	340.009	-0.106567	0.122584	-0.869339	0.384662	0.547436	ENSRNOG00000061147	Entrep1	endosomal transmembrane epsin interactor 1 [Source:RGD Symbol;Acc:1307524]
ENSRNOG00000018765	163.774	-0.384363	0.172744	-2.22504	0.0260783	0.0732695	ENSRNOG00000018765	Pold4	DNA polymerase delta 4, accessory subunit [Source:RGD Symbol;Acc:1308519]
ENSRNOG00000013828	1290.31	-0.0755509	0.0770241	-0.980873	0.326655	0.489035	ENSRNOG00000013828	Sirt3	sirtuin 3 [Source:RGD Symbol;Acc:1308374]
ENSRNOG00000013967	211.106	-0.15658	0.162316	-0.96466	0.334715	0.49766	ENSRNOG00000013967	Blnk	B-cell linker [Source:RGD Symbol;Acc:1561933]
ENSRNOG00000066970	972.637	-0.195333	0.101417	-1.92604	0.0541	0.129118	ENSRNOG00000066970
ENSRNOG00000028628	491.291	-0.358387	0.100149	-3.57852	0.000345539	0.00210897	ENSRNOG00000028628	Znf865	zinc finger protein 865 [Source:RGD Symbol;Acc:6494165]
ENSRNOG00000018066	472.305	-0.296491	0.0993394	-2.98462	0.00283927	0.0122121	ENSRNOG00000018066	Bccip	BRCA2 and CDKN1A interacting protein [Source:RGD Symbol;Acc:1307362]
ENSRNOG00000048166	92.2435	0.169328	0.201036	0.842274	0.399635	0.562207	ENSRNOG00000048166	Arhgap19	Rho GTPase activating protein 19 [Source:RGD Symbol;Acc:1593044]
ENSRNOG00000014891	166.769	1.18825	0.217933	5.45236	4.9706e-08	8.99994e-07	ENSRNOG00000014891	Ptar1	protein prenyltransferase alpha subunit repeat containing 1 [Source:RGD Symbol;Acc:708369]
ENSRNOG00000069460	153.6	-0.144182	0.170399	-0.846141	0.397474	0.560407	ENSRNOG00000069460
ENSRNOG00000026048	1947.32	-0.156155	0.0802188	-1.94661	0.0515812	0.124338	ENSRNOG00000026048	Gbf1	golgi brefeldin A resistant guanine nucleotide exchange factor 1 [Source:RGD Symbol;Acc:1307160]
ENSRNOG00000016635	466.708	0.0624129	0.107274	0.581806	0.560698	0.702461	ENSRNOG00000016635	Katnip	katanin interacting protein [Source:RGD Symbol;Acc:1595846]
ENSRNOG00000016750	44.6169	0.0314039	0.373946	0.0839798	0.933073	0.961464	ENSRNOG00000016750	Cyp26a1	cytochrome P450, family 26, subfamily a, polypeptide 1 [Source:RGD Symbol;Acc:620161]
ENSRNOG00000060867	24.6462	0.196425	0.373559	0.525821	0.599013	0.734866	ENSRNOG00000060867	Rln1	relaxin 1 [Source:RGD Symbol;Acc:3579]
ENSRNOG00000047349	29.8577	-0.165642	0.382584	-0.432957	0.665046	0.78413	ENSRNOG00000047349	Ms4a6b	membrane-spanning 4-domains, subfamily A, member 6B [Source:RGD Symbol;Acc:1311761]
ENSRNOG00000015932	174.854	0.166643	0.157623	1.05723	0.290408	0.449782	ENSRNOG00000015932	Plgrkt	plasminogen receptor with a C-terminal lysine [Source:RGD Symbol;Acc:1306839]
ENSRNOG00000025781	38.5113	0.856862	0.318086	2.6938	0.00706418	0.0258393	ENSRNOG00000025781	Sec31b	SEC31 homolog B, COPII coat complex component [Source:RGD Symbol;Acc:1598329]
ENSRNOG00000018119	635.042	-0.14537	0.09639	-1.50814	0.131519	0.254882	ENSRNOG00000018119	Dhx32	DEAH-box helicase 32 (putative) [Source:RGD Symbol;Acc:1311740]
ENSRNOG00000016112	60.7739	0.797033	0.290137	2.74709	0.00601272	0.0226032	ENSRNOG00000016112	Cd274	CD274 molecule [Source:RGD Symbol;Acc:1566211]
ENSRNOG00000011287	752.463	-0.0394728	0.0943263	-0.418471	0.675603	0.791498	ENSRNOG00000011287	Minpp1	multiple inositol-polyphosphate phosphatase 1 [Source:RGD Symbol;Acc:3089]
ENSRNOG00000014109	1525.29	-0.264402	0.0653255	-4.04745	5.17797e-05	0.000414265	ENSRNOG00000014109	Psmd13	proteasome 26S subunit, non-ATPase 13 [Source:RGD Symbol;Acc:1305236]
ENSRNOG00000016456	918.905	-0.127178	0.0974643	-1.30487	0.191938	0.336866	ENSRNOG00000016456	Il33	interleukin 33 [Source:RGD Symbol;Acc:1311155]
ENSRNOG00000042826	42.9366	0.902829	0.324541	2.78186	0.00540477	0.0207312	ENSRNOG00000042826	Zfp52	zinc finger protein 52 [Source:RGD Symbol;Acc:1359149]
ENSRNOG00000063577	176.141	0.258847	0.169324	1.52871	0.126335	0.247665	ENSRNOG00000063577	LOC102550851	zinc finger protein 420-like [Source:RGD Symbol;Acc:7563768]
ENSRNOG00000018327	21.9424	-0.187439	0.425454	-0.440562	0.65953	0.779729	ENSRNOG00000018327	Fank1	fibronectin type III and ankyrin repeat domains 1 [Source:RGD Symbol;Acc:1304756]
ENSRNOG00000043341	107.994	0.765579	0.206157	3.71357	0.000204356	0.00135902	ENSRNOG00000043341	Zfp51l1	zinc finger protein 51 like 1 [Source:RGD Symbol;Acc:1560046]
ENSRNOG00000042547	192.742	0.0449868	0.405373	0.110976	0.911635	0.947688	ENSRNOG00000042547	AABR07001902.1
ENSRNOG00000017349	1935.68	-0.113465	0.0549862	-2.06352	0.0390629	0.100509	ENSRNOG00000017349	Tbc1d10b	TBC1 domain family, member 10b [Source:RGD Symbol;Acc:1309191]
ENSRNOG00000020567	730.488	-0.015611	0.0783758	-0.199181	0.842121	0.903933	ENSRNOG00000020567	Fibp	FGF1 intracellular binding protein [Source:RGD Symbol;Acc:628715]
ENSRNOG00000024602	287.719	0.369115	0.132421	2.78743	0.00531274	0.0204508	ENSRNOG00000024602	Plekha7	pleckstrin homology domain containing A7 [Source:RGD Symbol;Acc:1598216]
ENSRNOG00000017751	5027.11	0.233586	0.0579758	4.02903	5.60076e-05	0.000443265	ENSRNOG00000017751	Arl6ip1	ADP-ribosylation factor like GTPase 6 interacting protein 1 [Source:RGD Symbol;Acc:735205]
ENSRNOG00000036585	23.3163	0.380626	0.412548	0.92262	0.356205	0.518859	ENSRNOG00000036585	Cfap43	cilia and flagella associated protein 43 [Source:RGD Symbol;Acc:1560545]
ENSRNOG00000063051	20.8217	-0.746552	0.457013	-1.63355	0.102354	0.211337	ENSRNOG00000063051	Cacng6	calcium voltage-gated channel auxiliary subunit gamma 6 [Source:RGD Symbol;Acc:628806]
ENSRNOG00000020455	156.366	-0.476911	0.173239	-2.75291	0.00590688	0.0223171	ENSRNOG00000020455	Cst6	cystatin E/M [Source:RGD Symbol;Acc:628799]
ENSRNOG00000018384	68.9295	-0.284116	0.234133	-1.21348	0.224945	0.377109	ENSRNOG00000018384	Adam12	ADAM metallopeptidase domain 12 [Source:RGD Symbol;Acc:1583652]
ENSRNOG00000017645	44.3152	0.229493	0.317165	0.723577	0.469325	0.624959	ENSRNOG00000017645	Myl11	myosin light chain 11 [Source:RGD Symbol;Acc:3141]
ENSRNOG00000019721	3265.19	-0.0746947	0.0529037	-1.4119	0.157979	0.291796	ENSRNOG00000019721	Ypel3	yippee-like 3 [Source:RGD Symbol;Acc:1564579]
ENSRNOG00000046602	37.2515	1.36567	0.379846	3.59531	0.000324002	0.00200246	ENSRNOG00000046602	Muc2	mucin 2, oligomeric mucus/gel-forming [Source:RGD Symbol;Acc:3123]
ENSRNOG00000020460	1238.96	-0.21944	0.0789582	-2.77919	0.00544939	0.0208784	ENSRNOG00000020460	Banf1	BAF nuclear assembly factor 1 [Source:RGD Symbol;Acc:620662]
ENSRNOG00000027491	981.842	0.0539668	0.0785055	0.687427	0.491814	0.645086	ENSRNOG00000027491	Vldlr	very low density lipoprotein receptor [Source:RGD Symbol;Acc:3963]
ENSRNOG00000020047	675.234	-0.226503	0.0990173	-2.28752	0.0221658	0.0642799	ENSRNOG00000020047	Tut1	terminal uridylyl transferase 1, U6 snRNA-specific [Source:RGD Symbol;Acc:1561043]
ENSRNOG00000053450	1066.14	0.181833	0.0772017	2.3553	0.0185079	0.0557969	ENSRNOG00000053450	Myadm	myeloid-associated differentiation marker [Source:RGD Symbol;Acc:727835]
ENSRNOG00000020813	724.436	-0.149718	0.0818013	-1.83026	0.0672104	0.152838	ENSRNOG00000020813	Ltbp3	latent transforming growth factor beta binding protein 3 [Source:RGD Symbol;Acc:62057]
ENSRNOG00000020463	760.496	-0.123985	0.0882105	-1.40556	0.159854	0.294482	ENSRNOG00000020463	Eif1ad	eukaryotic translation initiation factor 1A domain containing [Source:RGD Symbol;Acc:1304686]
ENSRNOG00000017822	5423.61	0.149151	0.0528268	2.82339	0.00475185	0.0186633	ENSRNOG00000017822	Oga	O-GlcNAcase [Source:RGD Symbol;Acc:621077]
ENSRNOG00000056257	4054.21	-0.0235073	0.0546728	-0.429964	0.667222	0.785624	ENSRNOG00000056257	Cacng7	calcium voltage-gated channel auxiliary subunit gamma 7 [Source:RGD Symbol;Acc:628807]
ENSRNOG00000058842	42256.3	-0.381947	0.057072	-6.69238	2.19564e-11	8.44748e-10	ENSRNOG00000058842	Sptbn2	spectrin, beta, non-erythrocytic 2 [Source:RGD Symbol;Acc:3751]
ENSRNOG00000023668	1517.18	-0.191719	0.0670193	-2.86066	0.00422761	0.0170042	ENSRNOG00000023668	Scyl1	SCY1 like pseudokinase 1 [Source:RGD Symbol;Acc:1307330]
ENSRNOG00000051570	34.6412	1.28855	0.416761	3.09181	0.00198938	0.00907728	ENSRNOG00000051570	Znf845l-ps1	zinc finger protein 845 like, pseudogene 1 [Source:RGD Symbol;Acc:7732425]
ENSRNOG00000016117	259.8	0.193459	0.139562	1.38619	0.16569	0.302668	ENSRNOG00000016117	Myof	myoferlin [Source:RGD Symbol;Acc:1564216]
ENSRNOG00000050994	2349.83	-0.094883	0.0585654	-1.62012	0.105206	0.215863	ENSRNOG00000050994	Cttn	cortactin [Source:RGD Symbol;Acc:619839]
ENSRNOG00000055229	1845.93	0.629101	0.0621812	10.1172	4.63381e-24	1.30968e-21	ENSRNOG00000055229	Lnpep	leucyl and cystinyl aminopeptidase [Source:RGD Symbol;Acc:621752]
ENSRNOG00000020475	1102.31	-0.310455	0.0762684	-4.07056	4.69012e-05	0.000379993	ENSRNOG00000020475	Sart1	spliceosome associated factor 1, recruiter of U4/U6.U5 tri-snRNP [Source:RGD Symbol;Acc:61930]
ENSRNOG00000042620	145.857	-0.097643	0.164823	-0.592413	0.553574	0.696684	ENSRNOG00000042620	Marveld1	MARVEL domain containing 1 [Source:RGD Symbol;Acc:1309811]
ENSRNOG00000014650	388.929	-0.036205	0.108367	-0.334095	0.738308	0.836681	ENSRNOG00000014650	Sema4g	semaphorin 4G [Source:RGD Symbol;Acc:1310436]
ENSRNOG00000014890	749.043	-0.116751	0.0910448	-1.28234	0.199723	0.346637	ENSRNOG00000014890	Mrpl43	mitochondrial ribosomal protein L43 [Source:RGD Symbol;Acc:1307593]
ENSRNOG00000014041	215.261	-0.0921444	0.157417	-0.585351	0.558312	0.700523	ENSRNOG00000014041	Cep78	centrosomal protein 78 [Source:RGD Symbol;Acc:620464]
ENSRNOG00000021150	279.608	-0.377358	0.142318	-2.65151	0.0080133	0.0285515	ENSRNOG00000021150	Plcb3	phospholipase C beta 3 [Source:RGD Symbol;Acc:61993]
ENSRNOG00000018944	692.293	0.150025	0.130647	1.14832	0.250838	0.406681	ENSRNOG00000018944	Pank1	pantothenate kinase 1 [Source:RGD Symbol;Acc:1304677]
ENSRNOG00000021005	565.995	-0.0574367	0.105116	-0.546413	0.584782	0.722501	ENSRNOG00000021005	Mrpl16	mitochondrial ribosomal protein L16 [Source:RGD Symbol;Acc:735195]
ENSRNOG00000014935	907.48	-0.0263119	0.0811785	-0.324123	0.745845	0.84264	ENSRNOG00000014935	Twnk	twinkle mtDNA helicase [Source:RGD Symbol;Acc:1307884]
ENSRNOG00000058422	23.9285	-0.339199	0.391827	-0.865687	0.386662	0.549106	ENSRNOG00000058422	Pirb	paired Ig-like receptor B [Source:RGD Symbol;Acc:1589827]
ENSRNOG00000016833	849.482	0.0416693	0.0854662	0.487553	0.625867	0.754781	ENSRNOG00000016833	Ide	insulin degrading enzyme [Source:RGD Symbol;Acc:2861]
ENSRNOG00000054371	5425.16	-0.00172405	0.0846123	-0.0203759	0.983743	0.99123	ENSRNOG00000054371	Prkcg	protein kinase C, gamma [Source:RGD Symbol;Acc:3397]
ENSRNOG00000056038	788.154	-0.299969	0.094432	-3.17656	0.00149032	0.00714391	ENSRNOG00000056038	Ehbp1l1	EH domain binding protein 1-like 1 [Source:RGD Symbol;Acc:1563823]
ENSRNOG00000058909	4127.96	-0.362186	0.0971855	-3.72675	0.000193967	0.00129815	ENSRNOG00000058909	Rps9	ribosomal protein S9 [Source:RGD Symbol;Acc:619889]
ENSRNOG00000059572	968.289	-0.0585894	0.0768167	-0.762717	0.445632	0.60464	ENSRNOG00000059572	Tsen34	tRNA splicing endonuclease subunit 34 [Source:RGD Symbol;Acc:1359564]
ENSRNOG00000052600	2729.76	-0.0893844	0.0666385	-1.34133	0.179813	0.321615	ENSRNOG00000052600	Mboat7	membrane bound O-acyltransferase domain containing 7 [Source:RGD Symbol;Acc:1306945]
ENSRNOG00000061893	151.235	0.1481	0.167409	0.884656	0.376342	0.539725	ENSRNOG00000061893	Leng1	leukocyte receptor cluster member 1 [Source:RGD Symbol;Acc:1307933]
ENSRNOG00000053728	63.0713	0.693189	0.261263	2.65322	0.00797276	0.0284476	ENSRNOG00000053728	Prkg1	protein kinase cGMP-dependent 1 [Source:RGD Symbol;Acc:1587390]
ENSRNOG00000053234	591.426	-0.228283	0.0915409	-2.49379	0.0126389	0.0410505	ENSRNOG00000053234	Cnot3	CCR4-NOT transcription complex, subunit 3 [Source:RGD Symbol;Acc:1304771]
ENSRNOG00000025523	503.492	-0.227392	0.0907983	-2.50436	0.0122673	0.0401721	ENSRNOG00000025523	Armh3	armadillo-like helical domain containing 3 [Source:RGD Symbol;Acc:9299787]
ENSRNOG00000061039	606.84	-0.211888	0.0880944	-2.40524	0.0161621	0.0500977	ENSRNOG00000061039	Prpf31	pre-mRNA processing factor 31 [Source:RGD Symbol;Acc:1305832]
ENSRNOG00000020975	1626.01	-0.153004	0.0640628	-2.38834	0.0169249	0.0518975	ENSRNOG00000020975	Mrpl49	mitochondrial ribosomal protein L49 [Source:RGD Symbol;Acc:1309920]
ENSRNOG00000056098	378.424	-0.0577085	0.109523	-0.526906	0.598259	0.734247	ENSRNOG00000056098	Tfpt	TCF3 fusion partner [Source:RGD Symbol;Acc:620839]
ENSRNOG00000060293	97.6886	0.0977874	0.205509	0.47583	0.634195	0.761314	ENSRNOG00000060293	Ndufa3	NADH:ubiquinone oxidoreductase subunit A3 [Source:RGD Symbol;Acc:1588687]
ENSRNOG00000014816	945.041	0.291065	0.11076	2.6279	0.00859142	0.0301572	ENSRNOG00000014816	Slc1a1	solute carrier family 1 member 1 [Source:RGD Symbol;Acc:3696]
ENSRNOG00000017406	10836.8	0.0552307	0.069077	0.799553	0.42397	0.585959	ENSRNOG00000017406	Atrnl1	attractin like 1 [Source:RGD Symbol;Acc:1563485]
ENSRNOG00000063395	119.79	0.459141	0.649175	0.707268	0.4794	0.633952	ENSRNOG00000063395
ENSRNOG00000022273	1066.61	0.277346	0.0794659	3.49012	0.0004828	0.00279111	ENSRNOG00000022273	Rfk	riboflavin kinase [Source:RGD Symbol;Acc:1549748]
ENSRNOG00000057848	763.524	-0.209094	0.105435	-1.98317	0.0473486	0.116252	ENSRNOG00000057848	Cacng8	calcium voltage-gated channel auxiliary subunit gamma 8 [Source:RGD Symbol;Acc:628808]
ENSRNOG00000034078	2828.9	-0.0439546	0.0581552	-0.755815	0.44976	0.60743	ENSRNOG00000034078	Mxi1	MAX interactor 1, dimerization protein [Source:RGD Symbol;Acc:3128]
ENSRNOG00000013552	1041.78	-0.191521	0.174288	-1.09888	0.27182	0.429379	ENSRNOG00000013552	Scd	stearoyl-CoA desaturase [Source:RGD Symbol;Acc:621176]
ENSRNOG00000062686	125.544	0.570805	0.213749	2.67045	0.00757503	0.0272935	ENSRNOG00000062686	Gcnt1	glucosaminyl (N-acetyl) transferase 1 [Source:RGD Symbol;Acc:621370]
ENSRNOG00000011130	42.7932	0.703289	0.461441	1.52411	0.12748	0.24951	ENSRNOG00000011130	Calca	calcitonin-related polypeptide alpha [Source:RGD Symbol;Acc:2254]
ENSRNOG00000017136	1270.42	-0.0789848	0.178094	-0.443501	0.657404	0.778492	ENSRNOG00000017136	Syt17	synaptotagmin 17 [Source:RGD Symbol;Acc:708576]
ENSRNOG00000017321	241.466	-0.157075	0.141216	-1.1123	0.26601	0.423128	ENSRNOG00000017321	Trub1	TruB pseudouridine synthase family member 1 [Source:RGD Symbol;Acc:1308502]
ENSRNOG00000055093	433.503	0.471496	0.133695	3.52664	0.000420864	0.0024883	ENSRNOG00000055093	Cep43	centrosomal protein 43 [Source:RGD Symbol;Acc:1583370]
ENSRNOG00000012258	345.222	-0.0121611	0.13164	-0.0923815	0.926395	0.957134	ENSRNOG00000012258	Rras2	RAS related 2 [Source:RGD Symbol;Acc:1310793]
ENSRNOG00000067119	61.4193	0.343475	0.312873	1.09781	0.272288	0.42984	ENSRNOG00000067119	Smim17	small integral membrane protein 17 [Source:RGD Symbol;Acc:1559613]
ENSRNOG00000020950	1027.74	-0.0219042	0.0839096	-0.261045	0.794058	0.873773	ENSRNOG00000020950	Syvn1	synoviolin 1 [Source:RGD Symbol;Acc:1310488]
ENSRNOG00000013413	512.872	0.43511	0.119592	3.6383	0.000274448	0.00173711	ENSRNOG00000013413	Rorb	RAR-related orphan receptor B [Source:RGD Symbol;Acc:1306778]
ENSRNOG00000070422	1355.55	0.333723	0.0753695	4.42782	9.51887e-06	9.35781e-05	ENSRNOG00000070422	Cstf2t	cleavage stimulation factor subunit 2, tau variant [Source:RGD Symbol;Acc:1310026]
ENSRNOG00000015124	3570.55	0.0175274	0.0891426	0.196622	0.844124	0.904959	ENSRNOG00000015124	Gpam	glycerol-3-phosphate acyltransferase, mitochondrial [Source:RGD Symbol;Acc:61847]
ENSRNOG00000020562	20.9784	-0.0150482	0.40215	-0.0374194	0.970151	0.983597	ENSRNOG00000020562	Slc22a18	solute carrier family 22, member 18 [Source:RGD Symbol;Acc:1303323]
ENSRNOG00000030210	64.6807	-0.386366	0.252572	-1.52973	0.126084	0.247305	ENSRNOG00000030210	Fndc1	fibronectin type III domain containing 1 [Source:RGD Symbol;Acc:1310640]
ENSRNOG00000018494	1794.17	-0.200981	0.0889466	-2.25957	0.0238481	0.06815	ENSRNOG00000018494	Ppp1r3c	protein phosphatase 1, regulatory subunit 3C [Source:RGD Symbol;Acc:1309132]
ENSRNOG00000024239	827.945	-0.226063	0.0854434	-2.64577	0.00815058	0.0289486	ENSRNOG00000024239	Fam89b	family with sequence similarity 89, member B [Source:RGD Symbol;Acc:1311544]
ENSRNOG00000021007	462.606	-0.399993	0.105181	-3.80289	0.000143018	0.000990774	ENSRNOG00000021007	Snx15	sorting nexin 15 [Source:RGD Symbol;Acc:1305803]
ENSRNOG00000012736	668.128	-0.252595	0.0883522	-2.85896	0.00425035	0.0170722	ENSRNOG00000012736	Znrd2	zinc ribbon domain containing 2 [Source:RGD Symbol;Acc:1593467]
ENSRNOG00000015137	87.8699	0.445475	0.227872	1.95493	0.0505908	0.122392	ENSRNOG00000015137	Spata6l	spermatogenesis associated 6-like [Source:RGD Symbol;Acc:1310039]
ENSRNOG00000010230	1406.2	0.503543	0.0788575	6.38549	1.70852e-10	5.35399e-09	ENSRNOG00000010230	Dennd10	DENN domain containing 10 [Source:RGD Symbol;Acc:1308326]
ENSRNOG00000058003	1339.57	0.230986	0.101203	2.2824	0.0224656	0.0649189	ENSRNOG00000058003	Spon1	spondin 1 [Source:RGD Symbol;Acc:619918]
ENSRNOG00000024712	79.0996	-0.31287	0.253722	-1.23312	0.21753	0.368111	ENSRNOG00000024712	Insc	INSC, spindle orientation adaptor protein [Source:RGD Symbol;Acc:1311379]
ENSRNOG00000019048	5717.71	0.242451	0.053722	4.51306	6.38985e-06	6.6042e-05	ENSRNOG00000019048	Sod2	superoxide dismutase 2 [Source:RGD Symbol;Acc:3732]
ENSRNOG00000008890	178.987	0.283358	0.178667	1.58595	0.11275	0.227559	ENSRNOG00000008890	Slc18a2	solute carrier family 18 member A2 [Source:RGD Symbol;Acc:3694]
ENSRNOG00000019091	1371.81	0.273581	0.0798711	3.42528	0.000614165	0.00340361	ENSRNOG00000019091	Wtap	WT1 associated protein [Source:RGD Symbol;Acc:1563824]
ENSRNOG00000019534	8297.43	-0.118525	0.0531402	-2.23043	0.0257189	0.0724674	ENSRNOG00000019534	Ap2a2	adaptor related protein complex 2 subunit alpha 2 [Source:RGD Symbol;Acc:71015]
ENSRNOG00000032554	97.7122	-0.0827606	0.240401	-0.344261	0.73065	0.831336	ENSRNOG00000032554	Scd4	stearoyl-coenzyme A desaturase 4 [Source:RGD Symbol;Acc:1563648]
ENSRNOG00000009460	2006.31	0.139627	0.0578138	2.41512	0.0157299	0.0489276	ENSRNOG00000009460	Pdzd8	PDZ domain containing 8 [Source:RGD Symbol;Acc:1308622]
ENSRNOG00000021010	1131.86	-0.235577	0.0757014	-3.11193	0.0018587	0.00857038	ENSRNOG00000021010	Arl2	ADP-ribosylation factor like GTPase 2 [Source:RGD Symbol;Acc:69326]
ENSRNOG00000019189	1448.84	-0.1157	0.0848048	-1.36432	0.172468	0.311664	ENSRNOG00000019189	Acat2	acetyl-CoA acetyltransferase 2 [Source:RGD Symbol;Acc:1359366]
ENSRNOG00000018532	151.349	0.570183	0.189195	3.01373	0.00258058	0.0112609	ENSRNOG00000018532	Pcgf5	polycomb group ring finger 5 [Source:RGD Symbol;Acc:1583513]
ENSRNOG00000009812	1124.55	0.203487	0.0747385	2.72266	0.00647596	0.0240225	ENSRNOG00000009812	Sbf2	SET binding factor 2 [Source:RGD Symbol;Acc:1588657]
ENSRNOG00000010958	1422.51	-0.0452762	0.0616872	-0.733963	0.462971	0.618979	ENSRNOG00000010958	Prdx3	peroxiredoxin 3 [Source:RGD Symbol;Acc:620040]
ENSRNOG00000013975	92.5943	0.0824528	0.216543	0.380769	0.703375	0.811675	ENSRNOG00000013975	Acat2l1	acetyl-CoA acetyltransferase 2-like 1 [Source:RGD Symbol;Acc:1562948]
ENSRNOG00000062728	263.395	0.215683	0.129594	1.6643	0.0960532	0.201699	ENSRNOG00000062728	Tctn3	tectonic family member 3 [Source:RGD Symbol;Acc:1305166]
ENSRNOG00000018704	2523.3	-0.0581532	0.0551134	-1.05516	0.291354	0.450929	ENSRNOG00000018704	Nolc1	nucleolar and coiled-body phosphoprotein 1 [Source:RGD Symbol;Acc:621578]
ENSRNOG00000062573	1507.13	-0.168869	0.0622228	-2.71394	0.00664878	0.0245397	ENSRNOG00000062573	Cd151	CD151 molecule (Raph blood group) [Source:RGD Symbol;Acc:621290]
ENSRNOG00000014160	2193.91	-0.240784	0.0538763	-4.46921	7.85091e-06	7.88148e-05	ENSRNOG00000014160	Tcp1	t-complex 1 [Source:RGD Symbol;Acc:3832]
ENSRNOG00000020892	1162.42	-0.181772	0.0767627	-2.36797	0.0178862	0.0543238	ENSRNOG00000020892	Dpf2	double PHD fingers 2 [Source:RGD Symbol;Acc:1311699]
ENSRNOG00000014582	561.394	-0.26271	0.105471	-2.49082	0.0127448	0.0413489	ENSRNOG00000014582	Mrpl18	mitochondrial ribosomal protein L18 [Source:RGD Symbol;Acc:1306387]
ENSRNOG00000048562	645.897	-0.394127	0.0950405	-4.14694	3.36955e-05	0.000284774	ENSRNOG00000048562	AC109542.1
ENSRNOG00000023140	22.412	0.00693243	0.396859	0.0174682	0.986063	0.992954	ENSRNOG00000023140	Pnldc1	PARN like ribonuclease domain containing exonuclease 1 [Source:RGD Symbol;Acc:1308678]
ENSRNOG00000051680	1672.3	0.25826	0.0789863	3.26969	0.00107667	0.00545085	ENSRNOG00000051680	Ccdc186	coiled-coil domain containing 186 [Source:RGD Symbol;Acc:1307158]
ENSRNOG00000014971	122.532	0.656079	0.207913	3.15554	0.001602	0.00759503	ENSRNOG00000014971	Mas1	MAS1 proto-oncogene, G protein-coupled receptor [Source:RGD Symbol;Acc:3049]
ENSRNOG00000029810	272.138	-0.214418	0.119195	-1.79889	0.0720368	0.161604	ENSRNOG00000029810	Tspan4	tetraspanin 4 [Source:RGD Symbol;Acc:1305810]
ENSRNOG00000061215	2112.28	-0.0426798	0.190877	-0.223598	0.82307	0.891302	ENSRNOG00000061215	Crym	crystallin, mu [Source:RGD Symbol;Acc:620943]
ENSRNOG00000019103	253.245	0.0271671	0.136942	0.198385	0.842744	0.904338	ENSRNOG00000019103	Cln3	CLN3 lysosomal/endosomal transmembrane protein, battenin [Source:RGD Symbol;Acc:1359537]
ENSRNOG00000025793	1832.11	0.373308	0.0671708	5.5576	2.7351e-08	5.23408e-07	ENSRNOG00000025793	Usp31	ubiquitin specific peptidase 31 [Source:RGD Symbol;Acc:1308183]
ENSRNOG00000020025	269.74	-0.0935854	0.141352	-0.662075	0.507923	0.658548	ENSRNOG00000020025	Slc29a2	solute carrier family 29 member 2 [Source:RGD Symbol;Acc:69296]
ENSRNOG00000010427	2571.91	0.494694	0.065133	7.59514	3.07455e-14	2.11153e-12	ENSRNOG00000010427	Ipo7	importin 7 [Source:RGD Symbol;Acc:1310849]
ENSRNOG00000027770	1697.91	0.242211	0.101117	2.39534	0.0166048	0.0511724	ENSRNOG00000027770	Trpm3	transient receptor potential cation channel, subfamily M, member 3 [Source:RGD Symbol;Acc:1304888]
ENSRNOG00000017403	72.4102	-0.00818125	0.23582	-0.0346928	0.972325	0.984772	ENSRNOG00000017403	Apobr	apolipoprotein B receptor [Source:RGD Symbol;Acc:1565169]
ENSRNOG00000017976	896.209	-0.245714	0.129477	-1.89774	0.0577297	0.135948	ENSRNOG00000017976	Slco2b1	solute carrier organic anion transporter family, member 2b1 [Source:RGD Symbol;Acc:621391]
ENSRNOG00000036601	901.131	-0.151656	0.100549	-1.50828	0.131483	0.254882	ENSRNOG00000036601	Exoc6	exocyst complex component 6 [Source:RGD Symbol;Acc:3653]
ENSRNOG00000015516	178.284	0.485245	0.159254	3.04698	0.00231152	0.0102791	ENSRNOG00000015516	Zng1a	Zn regulated GTPase metalloprotein activator 1A [Source:RGD Symbol;Acc:708495]
ENSRNOG00000018262	1225.92	-0.0320592	0.0849942	-0.377193	0.70603	0.813506	ENSRNOG00000018262	Ampd3	adenosine monophosphate deaminase 3 [Source:RGD Symbol;Acc:2111]
ENSRNOG00000029501	106.483	-0.0224206	0.184538	-0.121496	0.903298	0.943339	ENSRNOG00000029501	Hoga1	4-hydroxy-2-oxoglutarate aldolase 1 [Source:RGD Symbol;Acc:1310475]
ENSRNOG00000017158	18190.2	0.117601	0.0407264	2.88759	0.00388209	0.0158531	ENSRNOG00000017158	Eif4g2	eukaryotic translation initiation factor 4, gamma 2 [Source:RGD Symbol;Acc:1305294]
ENSRNOG00000018468	1500.66	-0.117122	0.0700342	-1.67236	0.0944536	0.199194	ENSRNOG00000018468	Ldb1	LIM domain binding 1 [Source:RGD Symbol;Acc:1310359]
ENSRNOG00000047386	1864.87	0.757911	0.10114	7.4937	6.69578e-14	4.31614e-12	ENSRNOG00000047386	Smg1	SMG1, nonsense mediated mRNA decay associated PI3K related kinase [Source:RGD Symbol;Acc:1563508]
ENSRNOG00000019372	3235.2	-0.204585	0.0617312	-3.31413	0.000919296	0.00478625	ENSRNOG00000019372	Pc	pyruvate carboxylase [Source:RGD Symbol;Acc:3262]
ENSRNOG00000017977	1965.1	-0.309239	0.0625226	-4.94603	7.57429e-07	1.01199e-05	ENSRNOG00000017977	Smpd1	sphingomyelin phosphodiesterase 1 [Source:RGD Symbol;Acc:1549719]
ENSRNOG00000063613	1110.15	-0.0558084	0.0765983	-0.728584	0.466256	0.622103	ENSRNOG00000063613	Chid1	chitinase domain containing 1 [Source:RGD Symbol;Acc:1308955]
ENSRNOG00000017767	140.548	-0.662895	0.178777	-3.70793	0.000208957	0.00138523	ENSRNOG00000017767	Irag1	inositol 1,4,5-triphosphate receptor associated 1 [Source:RGD Symbol;Acc:1309828]
ENSRNOG00000018020	7844.65	-0.151365	0.0553827	-2.73308	0.00627448	0.0234469	ENSRNOG00000018020	Apbb1	amyloid beta precursor protein binding family B member 1 [Source:RGD Symbol;Acc:2122]
ENSRNOG00000013176	1307.61	0.935587	0.0874458	10.699	1.02836e-26	3.59851e-24	ENSRNOG00000013176	Far1	fatty acyl CoA reductase 1 [Source:RGD Symbol;Acc:1306647]
ENSRNOG00000009523	1538.42	0.465771	0.077128	6.03894	1.55132e-09	3.95143e-08	ENSRNOG00000009523	Rab11fip2	RAB11 family interacting protein 2 [Source:RGD Symbol;Acc:1308538]
ENSRNOG00000016980	34.3723	0.132812	0.302377	0.439225	0.660499	0.780271	ENSRNOG00000016980	Qprt	quinolinate phosphoribosyltransferase [Source:RGD Symbol;Acc:1310309]
ENSRNOG00000031211	51.0671	-0.695092	0.709926	-0.979105	0.327528	0.490042	ENSRNOG00000031211	Acsm5	acyl-CoA synthetase medium-chain family member 5 [Source:RGD Symbol;Acc:1309578]
ENSRNOG00000015894	175.129	-0.206606	0.221123	-0.934349	0.350124	0.513191	ENSRNOG00000015894	Dock8	dedicator of cytokinesis 8 [Source:RGD Symbol;Acc:1561588]
ENSRNOG00000043225	169.909	-0.654443	0.17043	-3.83994	0.000123064	0.000874598	ENSRNOG00000043225	Zfp771	zinc finger protein 771 [Source:RGD Symbol;Acc:1305903]
ENSRNOG00000013744	106.755	-0.41263	0.186933	-2.20737	0.0272879	0.0758846	ENSRNOG00000013744	Akip1	A-kinase interacting protein 1 [Source:RGD Symbol;Acc:1306959]
ENSRNOG00000019356	441.768	-0.219865	0.111592	-1.97025	0.0488093	0.119023	ENSRNOG00000019356	Lrfn4	leucine rich repeat and fibronectin type III domain containing 4 [Source:RGD Symbol;Acc:1585286]
ENSRNOG00000026579	34.7768	0.215248	0.365673	0.588634	0.556107	0.698794	ENSRNOG00000026579	AC119332.1
ENSRNOG00000069185	2847.5	-0.0330576	0.0658284	-0.502179	0.615541	0.746946	ENSRNOG00000069185	Tmem9b	TMEM9 domain family, member B [Source:RGD Symbol;Acc:1310775]
ENSRNOG00000019708	1961.44	-0.125534	0.0564356	-2.22438	0.026123	0.073353	ENSRNOG00000019708	Ctsf	cathepsin F [Source:RGD Symbol;Acc:1308181]
ENSRNOG00000019745	31.5228	0.238411	0.360662	0.661036	0.508589	0.659048	ENSRNOG00000019745	Actn3	actinin alpha 3 [Source:RGD Symbol;Acc:621792]
ENSRNOG00000013290	4828.71	0.282708	0.0825799	3.42344	0.000618336	0.00342157	ENSRNOG00000013290	Nrip3	nuclear receptor interacting protein 3 [Source:RGD Symbol;Acc:1304777]
ENSRNOG00000019825	317.084	-0.0362967	0.134715	-0.269433	0.787596	0.869539	ENSRNOG00000019825	Zdhhc24	zinc finger, DHHC-type containing 24 [Source:RGD Symbol;Acc:1565630]
ENSRNOG00000013934	781.671	-0.0297151	0.0964463	-0.3081	0.758007	0.850882	ENSRNOG00000013934	Dennd2b	DENN domain containing 2B [Source:RGD Symbol;Acc:1308995]
ENSRNOG00000020300	135.544	-0.224328	0.189172	-1.18584	0.235686	0.390081	ENSRNOG00000020300	Lsp1	lymphocyte-specific protein 1 [Source:RGD Symbol;Acc:1306133]
ENSRNOG00000019832	814.749	-0.115837	0.0938058	-1.23486	0.216881	0.367351	ENSRNOG00000019832	Bbs1	Bardet-Biedl syndrome 1 [Source:RGD Symbol;Acc:1307581]
ENSRNOG00000016063	1027.27	-0.229742	0.0721161	-3.18572	0.00144394	0.00697163	ENSRNOG00000016063	Vps35l	VPS35 endosomal protein sorting factor like [Source:RGD Symbol;Acc:1564485]
ENSRNOG00000012911	579.593	0.0840212	0.0994767	0.844632	0.398316	0.561305	ENSRNOG00000012911	Erlin1	ER lipid raft associated 1 [Source:RGD Symbol;Acc:1307058]
ENSRNOG00000059968	913.346	0.109486	0.088269	1.24037	0.214839	0.364943	ENSRNOG00000059968	Jak2	Janus kinase 2 [Source:RGD Symbol;Acc:2939]
ENSRNOG00000070112	745.145	0.0330122	0.0902537	0.365771	0.714536	0.819664	ENSRNOG00000070112	Knop1	lysine-rich nucleolar protein 1 [Source:RGD Symbol;Acc:1565096]
ENSRNOG00000031485	1015.55	-0.329767	0.0837277	-3.93857	8.19692e-05	0.000612145	ENSRNOG00000031485	Dpp3	dipeptidylpeptidase 3 [Source:RGD Symbol;Acc:621127]
ENSRNOG00000036758	196.146	-0.250663	0.161054	-1.55639	0.119615	0.238271	ENSRNOG00000036758	Iqck	IQ motif containing K [Source:RGD Symbol;Acc:6502881]
ENSRNOG00000020113	566.68	-0.00103434	0.0920573	-0.0112358	0.991035	0.995577	ENSRNOG00000020113	Cnnm2	cyclin and CBS domain divalent metal cation transport mediator 2 [Source:RGD Symbol;Acc:1308162]
ENSRNOG00000016013	9052.13	-0.0699327	0.056745	-1.2324	0.217799	0.368439	ENSRNOG00000016013	Gprc5b	G protein-coupled receptor, class C, group 5, member B [Source:RGD Symbol;Acc:1309510]
ENSRNOG00000019693	1575.96	0.00685567	0.0654819	0.104696	0.916617	0.950707	ENSRNOG00000019693	Clpb	caseinolytic mitochondrial matrix peptidase chaperone subunit B [Source:RGD Symbol;Acc:621328]
ENSRNOG00000063290	493.709	-0.236496	0.156733	-1.50891	0.131322	0.254757	ENSRNOG00000063290	Hs3st4	heparan sulfate-glucosamine 3-sulfotransferase 4 [Source:RGD Symbol;Acc:11422907]
ENSRNOG00000018604	1234.69	-0.222657	0.0709654	-3.13755	0.00170368	0.00796657	ENSRNOG00000018604	Tufm	Tu translation elongation factor, mitochondrial [Source:RGD Symbol;Acc:1305501]
ENSRNOG00000049181	1406.2	-0.106758	0.080875	-1.32004	0.186821	0.33049	ENSRNOG00000049181	Sh2b1	SH2B adaptor protein 1 [Source:RGD Symbol;Acc:620132]
ENSRNOG00000069369	39.1753	0.543037	0.353048	1.53814	0.124014	0.244253	ENSRNOG00000069369	LOC691519	similar to ankyrin repeat domain 26 [Source:RGD Symbol;Acc:1582795]
ENSRNOG00000036742	4803.32	-0.158685	0.055286	-2.87025	0.00410149	0.0165831	ENSRNOG00000036742	Uqcrc2	ubiquinol cytochrome c reductase core protein 2 [Source:RGD Symbol;Acc:1359150]
ENSRNOG00000015310	84.5157	-0.692295	0.235679	-2.93745	0.00330927	0.0138961	ENSRNOG00000015310	Lrrc32	leucine rich repeat containing 32 [Source:RGD Symbol;Acc:1309087]
ENSRNOG00000027456	106.893	0.00717856	0.183617	0.0390953	0.968814	0.983162	ENSRNOG00000027456	Cdc42bpg	CDC42 binding protein kinase gamma [Source:RGD Symbol;Acc:1307260]
ENSRNOG00000019950	207.377	0.0292092	0.150159	0.194521	0.845768	0.906361	ENSRNOG00000019950	Peli3	pellino E3 ubiquitin protein ligase family member 3 [Source:RGD Symbol;Acc:1305989]
ENSRNOG00000017260	400.517	-0.25925	0.121295	-2.13734	0.03257	0.0871756	ENSRNOG00000017260	Cdr2	cerebellar degeneration-related protein 2 [Source:RGD Symbol;Acc:1310578]
ENSRNOG00000020010	1891.39	-0.124428	0.071828	-1.7323	0.08322	0.180609	ENSRNOG00000020010	Kctd13	potassium channel tetramerization domain containing 13 [Source:RGD Symbol;Acc:735189]
ENSRNOG00000016343	8981.56	0.208988	0.0893072	2.3401	0.0192784	0.0576821	ENSRNOG00000016343	Dkk3	dickkopf WNT signaling pathway inhibitor 3 [Source:RGD Symbol;Acc:621846]
ENSRNOG00000032929	363.698	-0.0122582	0.108501	-0.112977	0.910048	0.946968	ENSRNOG00000032929	Incenp	inner centromere protein [Source:RGD Symbol;Acc:1305292]
ENSRNOG00000027213	723.886	-0.334421	0.0854038	-3.91576	9.01196e-05	0.000666241	ENSRNOG00000027213	Asphd1	aspartate beta-hydroxylase domain containing 1 [Source:RGD Symbol;Acc:1306636]
ENSRNOG00000019613	71.345	0.0116841	0.251326	0.0464898	0.96292	0.979651	ENSRNOG00000019613	Syt9	synaptotagmin 9 [Source:RGD Symbol;Acc:621169]
ENSRNOG00000026942	751.327	0.319713	0.0823525	3.88225	0.000103495	0.00075077	ENSRNOG00000026942	RGD1311595	similar to KIAA2026 protein [Source:RGD Symbol;Acc:1311595]
ENSRNOG00000024144	2712.83	-0.172358	0.058474	-2.9476	0.00320246	0.013556	ENSRNOG00000024144	Cdipt	CDP-diacylglycerol--inositol 3-phosphatidyltransferase [Source:RGD Symbol;Acc:620576]
ENSRNOG00000016748	768.722	-0.172478	0.0909089	-1.89726	0.0577935	0.135968	ENSRNOG00000016748	Poll	DNA polymerase lambda [Source:RGD Symbol;Acc:1308053]
ENSRNOG00000017622	93.4026	-0.14371	0.23587	-0.609277	0.542341	0.688086	ENSRNOG00000017622	Npm3	nucleophosmin/nucleoplasmin, 3 [Source:RGD Symbol;Acc:1565542]
ENSRNOG00000010752	1009.55	0.394509	0.0823759	4.78913	1.67505e-06	2.0481e-05	ENSRNOG00000010752	Tmem41b	transmembrane protein 41B [Source:RGD Symbol;Acc:1310870]
ENSRNOG00000062870	2713.25	0.121047	0.0741999	1.63136	0.102815	0.21202	ENSRNOG00000062870	rnf141	ring finger protein 141 [Source:RGD Symbol;Acc:1303154]
ENSRNOG00000019662	616.571	0.438451	0.0899142	4.87632	1.08081e-06	1.38853e-05	ENSRNOG00000019662	Tm6sf1	transmembrane 6 superfamily member 1 [Source:RGD Symbol;Acc:1307978]
ENSRNOG00000020179	1636.81	-0.0902256	0.0582112	-1.54997	0.121149	0.240579	ENSRNOG00000020179	Nt5c2	5'-nucleotidase, cytosolic II [Source:RGD Symbol;Acc:2323387]
ENSRNOG00000026754	2405.24	-0.0161448	0.0593189	-0.27217	0.785491	0.86852	ENSRNOG00000026754	Usp47	ubiquitin specific peptidase 47 [Source:RGD Symbol;Acc:1310411]
ENSRNOG00000018164	1728.09	0.194008	0.0607765	3.19215	0.00141217	0.00685925	ENSRNOG00000018164	Spcs2	signal peptidase complex subunit 2 [Source:RGD Symbol;Acc:1311253]
ENSRNOG00000009910	610.084	-0.295516	0.105685	-2.79619	0.00517084	0.0199726	ENSRNOG00000009910	Swap70	switching B-cell complex subunit SWAP70 [Source:RGD Symbol;Acc:1305579]
ENSRNOG00000019740	1267.3	0.655574	0.0820819	7.98683	1.38456e-15	1.23326e-13	ENSRNOG00000019740	Hdgfl3	HDGF like 3 [Source:RGD Symbol;Acc:628773]
ENSRNOG00000017241	2199.02	-0.18265	0.077819	-2.34711	0.0189198	0.0567708	ENSRNOG00000017241	Dpcd	deleted in primary ciliary dyskinesia [Source:RGD Symbol;Acc:1307648]
ENSRNOG00000036572	265.103	0.27244	0.130424	2.08887	0.036719	0.0956335	ENSRNOG00000036572	Sfxn4	sideroflexin 4 [Source:RGD Symbol;Acc:1306088]
ENSRNOG00000046211	841.83	-0.288969	0.092386	-3.12784	0.00176094	0.00818996	ENSRNOG00000046211	Fbxw4	F-box and WD repeat domain containing 4 [Source:RGD Symbol;Acc:1306518]
ENSRNOG00000022619	38408.1	-0.345679	0.0583584	-5.92338	3.154e-09	7.40484e-08	ENSRNOG00000022619	Fth1	ferritin heavy chain 1 [Source:RGD Symbol;Acc:2635]
ENSRNOG00000022732	677.601	0.0687135	0.0864097	0.795207	0.426493	0.588506	ENSRNOG00000022732	Tmem126b	transmembrane protein 126B [Source:RGD Symbol;Acc:1308371]
ENSRNOG00000020248	6507.29	0.123065	0.06991	1.76034	0.0783509	0.172487	ENSRNOG00000020248	Ina	internexin neuronal intermediate filament protein, alpha [Source:RGD Symbol;Acc:2911]
ENSRNOG00000020376	247.819	-0.149932	0.130718	-1.14698	0.251389	0.407125	ENSRNOG00000020376	Stn1	STN1 subunit of CST complex [Source:RGD Symbol;Acc:1305637]
ENSRNOG00000020339	8247.23	-0.378893	0.0738797	-5.1285	2.92052e-07	4.36653e-06	ENSRNOG00000020339	Neurl1	neuralized E3 ubiquitin protein ligase 1 [Source:RGD Symbol;Acc:1307021]
ENSRNOG00000047545	258.152	-0.626574	0.153837	-4.07298	4.64159e-05	0.000376892	ENSRNOG00000047545	Adra2a	adrenoceptor alpha 2A [Source:RGD Symbol;Acc:2056]
ENSRNOG00000020346	35.9942	-0.00669592	0.336366	-0.0199066	0.984118	0.991403	ENSRNOG00000020346	Best1	bestrophin 1 [Source:RGD Symbol;Acc:1311656]
ENSRNOG00000014574	670.705	0.0626091	0.113036	0.553885	0.579658	0.718195	ENSRNOG00000014574	Entpd1	ectonucleoside triphosphate diphosphohydrolase 1 [Source:RGD Symbol;Acc:69265]
ENSRNOG00000015235	327.371	0.194817	0.125223	1.55576	0.119765	0.238444	ENSRNOG00000015235	Fra10ac1	FRA10A associated CGG repeat 1 [Source:RGD Symbol;Acc:1309482]
ENSRNOG00000020349	188.187	-0.00848158	0.148427	-0.0571431	0.954431	0.974658	ENSRNOG00000020349	Rab3il1	RAB3A interacting protein-like 1 [Source:RGD Symbol;Acc:619764]
ENSRNOG00000020353	363.675	-0.137875	0.12492	-1.1037	0.269722	0.426985	ENSRNOG00000020353	Sh3pxd2a	SH3 and PX domains 2A [Source:RGD Symbol;Acc:1311185]
ENSRNOG00000050585	13045.6	-0.0145369	0.0571603	-0.254318	0.79925	0.876712	ENSRNOG00000050585	Pgam1	phosphoglycerate mutase 1 [Source:RGD Symbol;Acc:3312]
ENSRNOG00000048708	386.544	0.0302468	0.123412	0.245088	0.806388	0.88158	ENSRNOG00000048708	Exosc1	exosome component 1 [Source:RGD Symbol;Acc:1591855]
ENSRNOG00000014758	2062.03	0.134531	0.0920495	1.46151	0.143876	0.272563	ENSRNOG00000014758	Lgi1	leucine-rich, glioma inactivated 1 [Source:RGD Symbol;Acc:628742]
ENSRNOG00000020385	583.7	0.030778	0.0912834	0.33717	0.735989	0.835018	ENSRNOG00000020385	Fads3	fatty acid desaturase 3 [Source:RGD Symbol;Acc:628876]
ENSRNOG00000016172	704.196	0.274109	0.100425	2.7295	0.00634305	0.0236609	ENSRNOG00000016172	Ric1	RIC1 homolog, RAB6A GEF complex partner 1 [Source:RGD Symbol;Acc:1310016]
ENSRNOG00000046530	469.031	-0.0465462	0.102425	-0.45444	0.649512	0.772258	ENSRNOG00000046530	Zdhhc16	zinc finger DHHC-type palmitoyltransferase 16 [Source:RGD Symbol;Acc:1591893]
ENSRNOG00000017438	149.795	-0.141048	0.184561	-0.764235	0.444727	0.60402	ENSRNOG00000017438	Gfra1	GDNF family receptor alpha 1 [Source:RGD Symbol;Acc:2681]
ENSRNOG00000045752	688.841	-0.0851417	0.10257	-0.830088	0.406489	0.568701	ENSRNOG00000045752	Rrm1	ribonucleotide reductase catalytic subunit M1 [Source:RGD Symbol;Acc:1592569]
ENSRNOG00000012552	642.197	-0.16966	0.0881752	-1.92412	0.0543394	0.129605	ENSRNOG00000012552	Ints4	integrator complex subunit 4 [Source:RGD Symbol;Acc:1305036]
ENSRNOG00000020440	2221.37	-0.343867	0.0753092	-4.56607	4.96954e-06	5.27726e-05	ENSRNOG00000020440	Fads2	fatty acid desaturase 2 [Source:RGD Symbol;Acc:68339]
ENSRNOG00000012584	113.182	-0.57166	0.213083	-2.6828	0.00730078	0.0265002	ENSRNOG00000012584	Aamdc	adipogenesis associated, Mth938 domain containing [Source:RGD Symbol;Acc:1561459]
ENSRNOG00000012820	3933.03	0.100519	0.0566688	1.7738	0.0760964	0.168712	ENSRNOG00000012820	Add3	adducin 3 [Source:RGD Symbol;Acc:2043]
ENSRNOG00000053923	1209.46	-0.0119233	0.0842622	-0.141503	0.887473	0.933189	ENSRNOG00000053923	Thap12	THAP domain containing 12 [Source:RGD Symbol;Acc:1309679]
ENSRNOG00000022635	4089.48	0.356529	0.074916	4.75905	1.94507e-06	2.33551e-05	ENSRNOG00000022635	Dlg2	discs large MAGUK scaffold protein 2 [Source:RGD Symbol;Acc:619895]
ENSRNOG00000046769	504.034	-0.0404145	0.0939573	-0.430137	0.667096	0.785602	ENSRNOG00000046769	Mms19	MMS19 homolog, cytosolic iron-sulfur assembly component [Source:RGD Symbol;Acc:727890]
ENSRNOG00000024194	629.478	0.312238	0.103225	3.02484	0.00248761	0.0109364	ENSRNOG00000024194	Rsf1	remodeling and spacing factor 1 [Source:RGD Symbol;Acc:1311245]
ENSRNOG00000026204	244.602	0.0214836	0.140327	0.153097	0.878322	0.927482	ENSRNOG00000026204	Dclre1a	DNA cross-link repair 1A [Source:RGD Symbol;Acc:1306156]
ENSRNOG00000067387	963.33	-0.23736	0.195314	-1.21528	0.224261	0.376209	ENSRNOG00000067387	Sbk1	SH3 domain binding kinase 1 [Source:RGD Symbol;Acc:628713]
ENSRNOG00000015221	3354.37	-0.261524	0.0634053	-4.12464	3.71319e-05	0.000309755	ENSRNOG00000015221	Eif3f	eukaryotic translation initiation factor 3, subunit F [Source:RGD Symbol;Acc:1306112]
ENSRNOG00000010915	1450.18	-0.00594758	0.0639373	-0.0930221	0.925886	0.956877	ENSRNOG00000010915	Ermp1	endoplasmic reticulum metallopeptidase 1 [Source:RGD Symbol;Acc:727831]
ENSRNOG00000015713	371.391	-0.0417527	0.118025	-0.353762	0.723517	0.826226	ENSRNOG00000015713	Parva	parvin, alpha [Source:RGD Symbol;Acc:71021]
ENSRNOG00000016948	255.972	0.454691	0.140642	3.23296	0.00122516	0.00609965	ENSRNOG00000016948	Nhlrc2	NHL repeat containing 2 [Source:RGD Symbol;Acc:1307348]
ENSRNOG00000020424	131.373	-0.119244	0.161413	-0.738752	0.460058	0.616705	ENSRNOG00000020424	Plpp4	phospholipid phosphatase 4 [Source:RGD Symbol;Acc:1306289]
ENSRNOG00000046566	891.26	0.207834	0.122466	1.69707	0.0896833	0.191414	ENSRNOG00000046566	Tub	TUB bipartite transcription factor [Source:RGD Symbol;Acc:3918]
ENSRNOG00000057623	1491.46	-0.0602807	0.0721898	-0.83503	0.403701	0.565712	ENSRNOG00000057623	Copb1	COPI coat complex subunit beta 1 [Source:RGD Symbol;Acc:620861]
ENSRNOG00000012763	608.787	0.231965	0.105498	2.19875	0.0278956	0.0771737	ENSRNOG00000012763	Cwf19l1	CWF19 like cell cycle control factor 1 [Source:RGD Symbol;Acc:1304716]
ENSRNOG00000017201	2858.68	0.000196471	0.068482	0.00286894	0.997711	0.998971	ENSRNOG00000017201	Cd2bp2	Cd2 (cytoplasmic tail) binding protein 2 [Source:RGD Symbol;Acc:1311741]
ENSRNOG00000014691	968.07	0.122434	0.0863076	1.41858	0.156023	0.289197	ENSRNOG00000014691	Ric3	RIC3 acetylcholine receptor chaperone [Source:RGD Symbol;Acc:1588939]
ENSRNOG00000056216	122.151	-0.00559391	0.19284	-0.0290081	0.976858	0.987135	ENSRNOG00000056216	Casp7	caspase 7 [Source:RGD Symbol;Acc:620944]
ENSRNOG00000011745	1589.87	0.0377832	0.0639375	0.590939	0.554561	0.697568	ENSRNOG00000011745	Psma1	proteasome 20S subunit alpha 1 [Source:RGD Symbol;Acc:61841]
ENSRNOG00000070303	51.1164	0.0324543	0.273928	0.118478	0.905689	0.944706	ENSRNOG00000070303
ENSRNOG00000056562	1098.37	-0.0838204	0.100436	-0.834565	0.403963	0.566026	ENSRNOG00000056562	Olfml1	olfactomedin-like 1 [Source:RGD Symbol;Acc:1311854]
ENSRNOG00000065255	598.354	-0.186905	0.130778	-1.42918	0.152951	0.284817	ENSRNOG00000065255	Gsg1l	GSG1-like [Source:RGD Symbol;Acc:1562278]
ENSRNOG00000011339	1185.38	-0.15048	0.0905229	-1.66235	0.0964431	0.202258	ENSRNOG00000011339	Slk	STE20-like kinase [Source:RGD Symbol;Acc:3780]
ENSRNOG00000031643	236.681	-0.169388	0.136949	-1.23686	0.216138	0.366387	ENSRNOG00000031643	Dchs1	dachsous cadherin-related 1 [Source:RGD Symbol;Acc:1309878]
ENSRNOG00000019667	308.508	-0.0175539	0.14277	-0.122952	0.902145	0.942548	ENSRNOG00000019667	Ppfibp2	PPFIA binding protein 2 [Source:RGD Symbol;Acc:1565383]
ENSRNOG00000019369	592.102	-0.0183385	0.0852541	-0.215104	0.829686	0.895359	ENSRNOG00000019369	Slx1b	SLX1 homolog B, structure-specific endonuclease subunit [Source:RGD Symbol;Acc:1311568]
ENSRNOG00000047988	801.508	-0.492425	0.087946	-5.59917	2.15376e-08	4.22052e-07	ENSRNOG00000047988	Bola2	bolA family member 2 [Source:RGD Symbol;Acc:1565363]
ENSRNOG00000019430	1613.32	-0.238382	0.0807761	-2.95115	0.00316594	0.0134381	ENSRNOG00000019430	Coro1a	coronin 1A [Source:RGD Symbol;Acc:620009]
ENSRNOG00000012206	13268.4	-0.134513	0.0499365	-2.69367	0.00706704	0.0258433	ENSRNOG00000012206	Dennd5a	DENN domain containing 5A [Source:RGD Symbol;Acc:1306759]
ENSRNOG00000030807	410.009	-0.117676	0.0953795	-1.23376	0.217291	0.367917	ENSRNOG00000030807	LOC100912427	nuclease-sensitive element-binding protein 1-like [Source:RGD Symbol;Acc:6486912]
ENSRNOG00000019751	78.7677	0.0270122	0.212839	0.126914	0.899009	0.940593	ENSRNOG00000019751	Cyb5r2	cytochrome b5 reductase 2 [Source:RGD Symbol;Acc:1308421]
ENSRNOG00000014629	184.798	-0.45535	0.19167	-2.3757	0.0175156	0.0533858	ENSRNOG00000014629	Lmo1	LIM domain only 1 [Source:RGD Symbol;Acc:621166]
ENSRNOG00000017679	561.057	0.0797157	0.136194	0.585309	0.55834	0.700523	ENSRNOG00000017679	Cckbr	cholecystokinin B receptor [Source:RGD Symbol;Acc:2290]
ENSRNOG00000047098	8483	-0.487761	0.221956	-2.19756	0.0279808	0.0773634	ENSRNOG00000047098	Hbb	hemoglobin subunit beta [Source:RGD Symbol;Acc:2783]
ENSRNOG00000050846	140.106	-0.332891	0.185039	-1.79903	0.0720136	0.161604	ENSRNOG00000050846	Timm10b	translocase of inner mitochondrial membrane 10B [Source:RGD Symbol;Acc:71097]
ENSRNOG00000051291	176.763	0.803451	0.171124	4.69515	2.66415e-06	3.07098e-05	ENSRNOG00000051291	Dnhd1	dynein heavy chain domain 1 [Source:RGD Symbol;Acc:1584052]
ENSRNOG00000056658	1212.57	0.291768	0.0830055	3.51505	0.000439676	0.00258373	ENSRNOG00000056658	Xylt1	xylosyltransferase 1 [Source:RGD Symbol;Acc:620093]
ENSRNOG00000018320	5033.53	-0.348157	0.0683099	-5.09673	3.45575e-07	5.08399e-06	ENSRNOG00000018320	Rps15a	ribosomal protein S15a [Source:RGD Symbol;Acc:619939]
ENSRNOG00000011417	347.671	0.344247	0.154347	2.23035	0.0257245	0.0724695	ENSRNOG00000011417	Pde3b	phosphodiesterase 3B [Source:RGD Symbol;Acc:61943]
ENSRNOG00000011367	23.1087	0.250921	0.392963	0.638535	0.523126	0.670537	ENSRNOG00000011367	Cyp2r1	cytochrome P450, family 2, subfamily r, polypeptide 1 [Source:RGD Symbol;Acc:1311866]
ENSRNOG00000067218	46.2609	0.63201	0.332661	1.89986	0.057451	0.135401	ENSRNOG00000067218
ENSRNOG00000062713	1805.11	0.300741	0.0650612	4.62243	3.79271e-06	4.19062e-05	ENSRNOG00000062713
ENSRNOG00000065005	266.191	-0.0908963	0.126387	-0.719192	0.472022	0.62747	ENSRNOG00000065005
ENSRNOG00000066426	1552.18	0.523356	0.0728861	7.18046	6.94768e-13	3.60813e-11	ENSRNOG00000066426
ENSRNOG00000063937	2904.03	0.107895	0.055715	1.93655	0.0527999	0.126694	ENSRNOG00000063937
ENSRNOG00000067172	1744.47	0.315344	0.0807451	3.90543	9.40572e-05	0.00069185	ENSRNOG00000067172
ENSRNOG00000070479	1471.84	0.410332	0.0751673	5.45892	4.79049e-08	8.74606e-07	ENSRNOG00000070479
ENSRNOG00000066155	2630.24	-0.214909	0.0710007	-3.02686	0.00247112	0.0108785	ENSRNOG00000066155
ENSRNOG00000067163	492.008	-0.411177	0.110068	-3.73566	0.000187224	0.00125645	ENSRNOG00000067163
ENSRNOG00000068916	238.665	0.642351	0.152752	4.20519	2.60862e-05	0.000228208	ENSRNOG00000068916
ENSRNOG00000062328	2444.64	0.333068	0.0620245	5.36995	7.87589e-08	1.36823e-06	ENSRNOG00000062328
ENSRNOG00000067663	93.2224	0.281592	0.203844	1.38141	0.167154	0.304834	ENSRNOG00000067663
ENSRNOG00000069106	122.87	-0.166912	0.19654	-0.849252	0.395741	0.558914	ENSRNOG00000069106
ENSRNOG00000064113	40.6837	0.677144	0.331688	2.04151	0.0412003	0.10478	ENSRNOG00000064113
ENSRNOG00000066818	172.734	0.442359	0.167864	2.63522	0.00840831	0.0296419	ENSRNOG00000066818
ENSRNOG00000070062	51.6012	0.839681	0.45023	1.865	0.062181	0.14394	ENSRNOG00000070062	LOC108348488	uncharacterized LOC108348488 [Source:RGD Symbol;Acc:11392724]
ENSRNOG00000067183	60.0027	-0.207492	0.24277	-0.854684	0.392726	0.555311	ENSRNOG00000067183	LOC103691053	uncharacterized LOC103691053 [Source:RGD Symbol;Acc:9431454]
ENSRNOG00000066241	124.072	0.458478	0.199582	2.29719	0.021608	0.0630981	ENSRNOG00000066241
ENSRNOG00000065487	123.072	0.15168	0.197542	0.767836	0.442584	0.602238	ENSRNOG00000065487
ENSRNOG00000065497	396.576	1.03171	0.111378	9.26317	1.98446e-20	3.55989e-18	ENSRNOG00000065497	LOC102547183	uncharacterized LOC102547183 [Source:RGD Symbol;Acc:7677078]
ENSRNOG00000064891	25.8694	0.983385	0.407823	2.4113	0.0158957	0.0493804	ENSRNOG00000064891
ENSRNOG00000064120	53.0829	0.350029	0.360793	0.970165	0.331964	0.494865	ENSRNOG00000064120
ENSRNOG00000064053	1856.04	0.217024	0.098244	2.20903	0.0271722	0.0756632	ENSRNOG00000064053	Ctxnd1	cortexin domain containing 1 [Source:RGD Symbol;Acc:7557291]
ENSRNOG00000065190	72.5431	0.0878722	0.242809	0.361898	0.717428	0.821507	ENSRNOG00000065190
ENSRNOG00000028449	284.061	0.164666	0.128159	1.28486	0.198841	0.345801	ENSRNOG00000028449	Rpl9	ribosomal protein L9 [Source:RGD Symbol;Acc:62049]
ENSRNOG00000063029	30.7342	0.554045	0.384225	1.44198	0.149308	0.279891	ENSRNOG00000063029
ENSRNOG00000060587	307.989	0.395898	0.145402	2.72278	0.00647345	0.0240193	ENSRNOG00000060587	AABR07002627.1
ENSRNOG00000060288	174.568	0.146188	0.149948	0.974919	0.3296	0.492541	ENSRNOG00000060288	LOC100365062	eukaryotic translation initiation factor 3, subunit 6 48kDa-like [Source:RGD Symbol;Acc:2319808]
ENSRNOG00000014252	583.424	-0.342168	0.103706	-3.29939	0.000968944	0.0050002	ENSRNOG00000014252	Irf2bp1	interferon regulatory factor 2 binding protein 1 [Source:RGD Symbol;Acc:1308312]
ENSRNOG00000063049	4583.98	0.0854768	0.0611904	1.3969	0.162444	0.298281	ENSRNOG00000063049	Pnma8c	PNMA family member 8C [Source:RGD Symbol;Acc:41230706]
ENSRNOG00000016863	9233.03	-0.0272331	0.056496	-0.482036	0.62978	0.758182	ENSRNOG00000016863	Pnma8b	PNMA family member 8B [Source:RGD Symbol;Acc:1560435]
ENSRNOG00000063636	160.456	0.711472	0.199895	3.55923	0.000371941	0.00224402	ENSRNOG00000063636	Gng5	G protein subunit gamma 5 [Source:RGD Symbol;Acc:620807]
ENSRNOG00000065335	39.7998	0.0591115	0.321503	0.18386	0.854123	0.911028	ENSRNOG00000065335
ENSRNOG00000050758	165.572	0.16592	0.160146	1.03605	0.300177	0.460848	ENSRNOG00000050758	Epc2l1	enhancer of polycomb homolog 2 (Drosophila)-like 1 [Source:RGD Symbol;Acc:1561337]
ENSRNOG00000066033	1488.94	-0.454918	0.0782105	-5.81659	6.00617e-09	1.31554e-07	ENSRNOG00000066033	Marcksl1	MARCKS-related protein-like [Source:RGD Symbol;Acc:9082300]
ENSRNOG00000047045	534.342	-0.0359268	0.104676	-0.34322	0.731433	0.831711	ENSRNOG00000047045	Sdhaf1	succinate dehydrogenase complex assembly factor 1 [Source:RGD Symbol;Acc:1562079]
ENSRNOG00000032232	141.935	0.0253588	0.171282	0.148054	0.8823	0.929746	ENSRNOG00000032232	Snrpg	small nuclear ribonucleoprotein polypeptide G [Source:RGD Symbol;Acc:1584713]
ENSRNOG00000030351	200.744	-0.0357402	0.168902	-0.211604	0.832416	0.897511	ENSRNOG00000030351	LOC108348989	high mobility group protein B1 pseudogene [Source:RGD Symbol;Acc:11444414]
ENSRNOG00000037364	27.0891	0.419615	0.363879	1.15317	0.248839	0.404645	ENSRNOG00000037364	Cdc42se2	CDC42 small effector 2 [Source:RGD Symbol;Acc:1563924]
ENSRNOG00000031859	474.155	-0.403594	0.116526	-3.46355	0.0005331	0.00303211	ENSRNOG00000031859	RGD1562402	similar to 60S ribosomal protein L27a [Source:RGD Symbol;Acc:1562402]
ENSRNOG00000021128	1090.08	0.0503912	0.0709806	0.70993	0.477748	0.632222	ENSRNOG00000021128	Kcnj11	potassium inwardly-rectifying channel, subfamily J, member 11 [Source:RGD Symbol;Acc:69247]
ENSRNOG00000010146	2475.32	0.197388	0.0795181	2.4823	0.0130536	0.0422388	ENSRNOG00000010146	Ndn	necdin, MAGE family member [Source:RGD Symbol;Acc:1310526]
ENSRNOG00000010158	21.6686	-0.0294719	0.422123	-0.0698183	0.944338	0.968118	ENSRNOG00000010158	Magel2	MAGE family member L2 [Source:RGD Symbol;Acc:1583615]
ENSRNOG00000070574	702.466	-0.0703395	0.0843715	-0.833688	0.404457	0.566556	ENSRNOG00000070574	LOC691427	ATP synthase membrane subunit 6.8PL, pseudogene 1 [Source:RGD Symbol;Acc:41312538]
ENSRNOG00000012349	328.136	-0.0961996	0.125233	-0.768166	0.442388	0.602156	ENSRNOG00000012349	Tlnrd1	talin rod domain containing 1 [Source:RGD Symbol;Acc:1311666]
ENSRNOG00000048071	36.3227	0.925421	0.327679	2.82417	0.00474028	0.0186228	ENSRNOG00000048071	Ccdc89	coiled-coil domain-containing protein 89-like [Source:RGD Symbol;Acc:6490972]
ENSRNOG00000022941	60.5657	-0.83645	0.267014	-3.13261	0.00173261	0.00807872	ENSRNOG00000022941	LOC102549852	ferritin light chain 1-like [Source:RGD Symbol;Acc:7625414]
ENSRNOG00000063715	282.065	-0.0506318	0.120461	-0.420318	0.674253	0.790735	ENSRNOG00000063715	LOC108349446	60S ribosomal protein L35a pseudogene [Source:RGD Symbol;Acc:11501622]
ENSRNOG00000018503	125.321	-0.461664	0.178572	-2.58531	0.0097292	0.0333378	ENSRNOG00000018503	AC098008.1
ENSRNOG00000013596	499.987	0.569308	0.101226	5.62414	1.86438e-08	3.70782e-07	ENSRNOG00000013596	Dimt1	DIM1 rRNA methyltransferase and ribosome maturation factor [Source:RGD Symbol;Acc:1311752]
ENSRNOG00000062707	157.063	0.390468	0.218121	1.79014	0.0734311	0.16399	ENSRNOG00000062707	LOC120100725	uncharacterized LOC120100725 [Source:RGD Symbol;Acc:41172051]
ENSRNOG00000015691	4626.54	-0.225553	0.0810808	-2.78183	0.00540531	0.0207312	ENSRNOG00000015691	Inka2	inka box actin regulator 2 [Source:RGD Symbol;Acc:1306526]
ENSRNOG00000065902	806.127	0.116396	0.0898237	1.29583	0.195035	0.340673	ENSRNOG00000065902	LOC102549789	uncharacterized LOC102549789 [Source:RGD Symbol;Acc:7645336]
ENSRNOG00000069617	97.9059	0.677297	0.222229	3.04775	0.00230561	0.010259	ENSRNOG00000069617
ENSRNOG00000016408	126.162	0.236773	0.188506	1.25605	0.209098	0.358361	ENSRNOG00000016408	Kirrel1	kirre like nephrin family adhesion molecule 1 [Source:RGD Symbol;Acc:727883]
ENSRNOG00000019455	381.009	-0.0948406	0.138887	-0.68286	0.494695	0.647478	ENSRNOG00000019455	Ap4b1	adaptor related protein complex 4 subunit beta 1 [Source:RGD Symbol;Acc:1310529]
ENSRNOG00000069092	67.8574	0.867373	0.284297	3.05094	0.00228129	0.0101662	ENSRNOG00000069092
ENSRNOG00000013790	1627.98	-0.0550025	0.0583385	-0.942817	0.345774	0.50905	ENSRNOG00000013790	Mfsd1	major facilitator superfamily domain containing 1 [Source:RGD Symbol;Acc:1305751]
ENSRNOG00000020893	3778.59	0.167535	0.055442	3.0218	0.00251279	0.0110142	ENSRNOG00000020893	Snx27	sorting nexin 27 [Source:RGD Symbol;Acc:628705]
ENSRNOG00000062864	724.425	0.529125	0.0912522	5.79849	6.69138e-09	1.4441e-07	ENSRNOG00000062864	LOC120100659	uncharacterized LOC120100659 [Source:RGD Symbol;Acc:40960165]
ENSRNOG00000068207	170.894	0.695161	0.374333	1.85707	0.0633015	0.145936	ENSRNOG00000068207
ENSRNOG00000062875	167.458	-0.0956636	0.159412	-0.600103	0.548438	0.692767	ENSRNOG00000062875
ENSRNOG00000009468	69.4372	0.0439918	0.24767	0.177623	0.859019	0.914723	ENSRNOG00000009468	Il12a	interleukin 12A [Source:RGD Symbol;Acc:620562]
ENSRNOG00000064252	20.6057	-0.0596204	0.478689	-0.124549	0.90088	0.941811	ENSRNOG00000064252	LOC102553736	uncharacterized LOC102553736 [Source:RGD Symbol;Acc:7678070]
ENSRNOG00000000096	279.974	-0.123784	0.1212	-1.02132	0.307104	0.468513	ENSRNOG00000000096	Pdzk1	PDZ domain containing 1 [Source:RGD Symbol;Acc:70924]
ENSRNOG00000011135	462.87	-0.11357	0.121693	-0.93325	0.350691	0.513562	ENSRNOG00000011135	Gtf2b	general transcription factor IIB [Source:RGD Symbol;Acc:619735]
ENSRNOG00000066793	195.39	0.0634811	0.139107	0.456347	0.648141	0.771376	ENSRNOG00000066793
ENSRNOG00000065021	23.5907	0.73294	0.44502	1.64698	0.0995618	0.207236	ENSRNOG00000065021	Naaladl2	N-acetylated alpha-linked acidic dipeptidase-like 2 [Source:RGD Symbol;Acc:1565147]
ENSRNOG00000062826	40.1866	-0.279232	0.332814	-0.839002	0.401468	0.563743	ENSRNOG00000062826	Gm17651	predicted gene, 17651 [Source:RGD Symbol;Acc:150342749]
ENSRNOG00000009792	55.2565	-0.293669	0.28849	-1.01795	0.308701	0.470299	ENSRNOG00000009792	Zbbx	zinc finger, B-box domain containing [Source:RGD Symbol;Acc:1308632]
ENSRNOG00000014000	1962	0.112056	0.0613628	1.82613	0.0678314	0.154036	ENSRNOG00000014000	Kif2a	kinesin family member 2A [Source:RGD Symbol;Acc:70974]
ENSRNOG00000062674	276.789	-0.0936975	0.12533	-0.747605	0.454699	0.612306	ENSRNOG00000062674
ENSRNOG00000016580	6022.4	-0.390199	0.0728235	-5.35815	8.4077e-08	1.45033e-06	ENSRNOG00000016580	Rps23	ribosomal protein S23 [Source:RGD Symbol;Acc:621039]
ENSRNOG00000065909	36.2505	0.066727	0.375449	0.177726	0.858938	0.914723	ENSRNOG00000065909
ENSRNOG00000009548	346.419	0.489735	0.140955	3.4744	0.000511991	0.00293133	ENSRNOG00000009548	Fpgt	fucose-1-phosphate guanylyltransferase [Source:RGD Symbol;Acc:735121]
ENSRNOG00000016878	628.891	0.378161	0.0921453	4.10397	4.06128e-05	0.000335895	ENSRNOG00000016878	Plppr5	phospholipid phosphatase related 5 [Source:RGD Symbol;Acc:1309567]
ENSRNOG00000070241	225.124	-0.140409	0.137318	-1.02251	0.30654	0.468221	ENSRNOG00000070241
ENSRNOG00000063312	52.217	0.271103	0.29018	0.934257	0.350171	0.51321	ENSRNOG00000063312	LOC120100783	uncharacterized LOC120100783 [Source:RGD Symbol;Acc:41047054]
ENSRNOG00000065226	77.3964	0.281141	0.254868	1.10309	0.26999	0.427314	ENSRNOG00000065226	Ufm1	ubiquitin-fold modifier 1 [Source:RGD Symbol;Acc:1304890]
ENSRNOG00000019023	1018.42	-0.099128	0.0797615	-1.24281	0.21394	0.36423	ENSRNOG00000019023	Tars1	threonyl-tRNA synthetase 1 [Source:RGD Symbol;Acc:1359527]
ENSRNOG00000024213	700.815	0.0525057	0.0797519	0.658363	0.510305	0.660439	ENSRNOG00000024213	Golim4	golgi integral membrane protein 4 [Source:RGD Symbol;Acc:1310948]
ENSRNOG00000067530	832.089	-0.00600878	0.108498	-0.0553814	0.955835	0.975616	ENSRNOG00000067530	LOC103691527	uncharacterized LOC103691527 [Source:RGD Symbol;Acc:9202401]
ENSRNOG00000050321	921.125	0.251028	0.072142	3.47964	0.000502095	0.00288366	ENSRNOG00000050321	Zzz3	zinc finger, ZZ-type containing 3 [Source:RGD Symbol;Acc:1565468]
ENSRNOG00000069542	303.479	0.459849	0.174151	2.64053	0.00827773	0.0293081	ENSRNOG00000069542
ENSRNOG00000067311	2335.45	0.413985	0.0655594	6.31465	2.7077e-10	8.02319e-09	ENSRNOG00000067311
ENSRNOG00000000091	267.195	-0.00565429	0.136185	-0.0415193	0.966882	0.9821	ENSRNOG00000000091	Smad9	SMAD family member 9 [Source:RGD Symbol;Acc:71004]
ENSRNOG00000067758	1373.62	0.269877	0.070357	3.83583	0.00012514	0.00088721	ENSRNOG00000067758	Slc10a5	solute carrier family 10, member 5 [Source:RGD Symbol;Acc:1306036]
ENSRNOG00000009388	486.063	0.251532	0.103522	2.42974	0.0151097	0.0474401	ENSRNOG00000009388	Sptssb	serine palmitoyltransferase, small subunit B [Source:RGD Symbol;Acc:2324614]
ENSRNOG00000019671	527.605	0.956549	0.0977072	9.78996	1.24344e-22	2.94756e-20	ENSRNOG00000019671	Rsbn1	round spermatid basic protein 1 [Source:RGD Symbol;Acc:1307231]
ENSRNOG00000066942	650.568	-0.10869	0.0822625	-1.32126	0.186416	0.330024	ENSRNOG00000066942	Cox6b1	cytochrome c oxidase subunit 6B1 [Source:RGD Symbol;Acc:1584097]
ENSRNOG00000065602	1810.6	-0.512692	0.0724151	-7.07991	1.44253e-12	7.06693e-11	ENSRNOG00000065602	Ftl1-ps14	ferritin light chain 1, pseudogene 14 [Source:RGD Symbol;Acc:2324713]
ENSRNOG00000016387	2575.89	-0.412086	0.0936324	-4.40111	1.077e-05	0.000103999	ENSRNOG00000016387	Rpl34	ribosomal protein L34 [Source:RGD Symbol;Acc:1309402]
ENSRNOG00000013282	308.068	0.930231	0.182143	5.10715	3.27046e-07	4.8259e-06	ENSRNOG00000013282	Mctp1	multiple C2 and transmembrane domain containing 1 [Source:RGD Symbol;Acc:1305199]
ENSRNOG00000069709	1856.39	0.0375759	0.0671267	0.559776	0.575632	0.715076	ENSRNOG00000069709	Tmem167b	transmembrane protein 167B [Source:RGD Symbol;Acc:1564454]
ENSRNOG00000062733	88.3412	0.109376	0.218188	0.501295	0.616163	0.747421	ENSRNOG00000062733	LOC102550011	uncharacterized LOC102550011 [Source:RGD Symbol;Acc:7675361]
ENSRNOG00000013886	62.8324	-0.132035	0.260003	-0.507822	0.611578	0.743701	ENSRNOG00000013886	Fyb1	FYN binding protein 1 [Source:RGD Symbol;Acc:1563421]
ENSRNOG00000047137	1264.56	0.364287	0.0858005	4.24574	2.17875e-05	0.000194185	ENSRNOG00000047137	Erbin	erbb2 interacting protein [Source:RGD Symbol;Acc:1562952]
ENSRNOG00000000095	637.272	0.0505143	0.0797684	0.633262	0.526563	0.67392	ENSRNOG00000000095	Gpr89b	G protein-coupled receptor 89B [Source:RGD Symbol;Acc:1304837]
ENSRNOG00000026059	279.9	-0.338832	0.140168	-2.41732	0.0156352	0.0486946	ENSRNOG00000026059	Paqr6	progestin and adipoQ receptor family member 6 [Source:RGD Symbol;Acc:1584722]
ENSRNOG00000066623	27.7661	0.199537	0.375736	0.531057	0.595379	0.732119	ENSRNOG00000066623
ENSRNOG00000064711	124.487	0.374417	0.187681	1.99496	0.0460472	0.113901	ENSRNOG00000064711
ENSRNOG00000050343	614.21	0.367318	0.0925017	3.97093	7.15937e-05	0.000544435	ENSRNOG00000050343	Jmy	junction mediating and regulatory protein, p53 cofactor [Source:RGD Symbol;Acc:1585601]
ENSRNOG00000067315	152.224	0.270525	0.179113	1.51036	0.130951	0.254205	ENSRNOG00000067315
ENSRNOG00000016872	2431.03	0.332569	0.0885249	3.75678	0.000172114	0.00116785	ENSRNOG00000016872	Plppr4	phospholipid phosphatase related 4 [Source:RGD Symbol;Acc:727806]
ENSRNOG00000065873	160.728	-0.0916875	0.15178	-0.604081	0.54579	0.691089	ENSRNOG00000065873
ENSRNOG00000065683	77.2537	-0.528041	0.206301	-2.55957	0.0104802	0.0353762	ENSRNOG00000065683
ENSRNOG00000067598	142.192	0.218144	0.234229	0.931328	0.351684	0.514394	ENSRNOG00000067598
ENSRNOG00000046947	5395.66	-0.0123533	0.0758446	-0.162876	0.870616	0.922128	ENSRNOG00000046947	Ak5	adenylate kinase 5 [Source:RGD Symbol;Acc:1590818]
ENSRNOG00000064998	80.0181	0.0966986	0.217834	0.443909	0.657108	0.778267	ENSRNOG00000064998
ENSRNOG00000032002	601.384	0.428132	0.108094	3.96073	7.4722e-05	0.000565494	ENSRNOG00000032002	Hapln1	hyaluronan and proteoglycan link protein 1 [Source:RGD Symbol;Acc:2412]
ENSRNOG00000060538	56.4321	0.14262	0.276687	0.515458	0.606233	0.740147	ENSRNOG00000060538	Cdc42se1	CDC42 small effector 1 [Source:RGD Symbol;Acc:1561700]
ENSRNOG00000015226	1124.17	0.414121	0.111837	3.7029	0.000213153	0.00140733	ENSRNOG00000015226	Man1a2	mannosidase, alpha, class 1A, member 2 [Source:RGD Symbol;Acc:1309767]
ENSRNOG00000042814	49.5485	0.503976	0.286668	1.75805	0.0787398	0.173136	ENSRNOG00000042814	Henmt1	HEN methyltransferase 1 [Source:RGD Symbol;Acc:1306230]
ENSRNOG00000042068	854.311	0.264571	0.0983373	2.69045	0.00713565	0.0260036	ENSRNOG00000042068	Otud7b	OTU deubiquitinase 7B [Source:RGD Symbol;Acc:1308111]
ENSRNOG00000048043	741.352	0.145786	0.113423	1.28533	0.198676	0.345596	ENSRNOG00000048043	F2r	coagulation factor II (thrombin) receptor [Source:RGD Symbol;Acc:2586]
ENSRNOG00000009533	676.602	-0.00538356	0.110694	-0.0486345	0.961211	0.97895	ENSRNOG00000009533	Erich3	glutamate-rich 3 [Source:RGD Symbol;Acc:1593279]
ENSRNOG00000067940	60.1696	0.0831066	0.270349	0.307404	0.758536	0.851007	ENSRNOG00000067940
ENSRNOG00000062438	785.213	0.118146	0.0870241	1.35763	0.174582	0.314451	ENSRNOG00000062438
ENSRNOG00000017105	127.663	0.117738	0.161873	0.72735	0.467012	0.622725	ENSRNOG00000017105	Dpyd	dihydropyrimidine dehydrogenase [Source:RGD Symbol;Acc:621218]
ENSRNOG00000062326	108.371	0.227564	0.206182	1.1037	0.269723	0.426985	ENSRNOG00000062326
ENSRNOG00000027089	846.785	0.329836	0.09226	3.57507	0.000350132	0.00213169	ENSRNOG00000027089	Ell2	elongation factor for RNA polymerase II 2 [Source:RGD Symbol;Acc:1309296]
ENSRNOG00000065278	32.3954	0.657261	0.376853	1.74408	0.0811453	0.177258	ENSRNOG00000065278	LOC103691652	uncharacterized LOC103691652 [Source:RGD Symbol;Acc:9242885]
ENSRNOG00000021157	6819.71	-0.278915	0.158666	-1.75788	0.0787675	0.17316	ENSRNOG00000021157	Ctss	cathepsin S [Source:RGD Symbol;Acc:621513]
ENSRNOG00000031247	58.3769	0.535381	0.268105	1.99691	0.0458355	0.113555	ENSRNOG00000031247	Lekr1	leucine, glutamate and lysine rich 1 [Source:RGD Symbol;Acc:1565425]
ENSRNOG00000060329	360.558	0.118661	0.156165	0.759843	0.447348	0.605794	ENSRNOG00000060329	Emb	embigin [Source:RGD Symbol;Acc:621067]
ENSRNOG00000015925	885.978	0.26414	0.0784012	3.36908	0.000754189	0.00403947	ENSRNOG00000015925	Zfp131	zinc finger protein 131 [Source:RGD Symbol;Acc:1307638]
ENSRNOG00000062883	93.7184	-0.262444	0.210064	-1.24935	0.211536	0.361127	ENSRNOG00000062883
ENSRNOG00000042536	888.193	0.455178	0.129295	3.52047	0.000430777	0.00253753	ENSRNOG00000042536	Pde4d	phosphodiesterase 4D [Source:RGD Symbol;Acc:3281]
ENSRNOG00000071119	111.077	0.210108	0.178262	1.17865	0.238539	0.39338	ENSRNOG00000071119
ENSRNOG00000011107	516.746	0.716118	0.135831	5.27212	1.34857e-07	2.22264e-06	ENSRNOG00000011107	Pcsk1	proprotein convertase subtilisin/kexin type 1 [Source:RGD Symbol;Acc:3272]
ENSRNOG00000021176	251.991	0.182763	0.140719	1.29878	0.19402	0.339386	ENSRNOG00000021176	Mtmr11	myotubularin related protein 11 [Source:RGD Symbol;Acc:1589965]
ENSRNOG00000018068	21.0073	1.11508	0.456923	2.44041	0.0146707	0.0462993	ENSRNOG00000018068	Ndufs6	NADH:ubiquinone oxidoreductase subunit S6 [Source:RGD Symbol;Acc:3156]
ENSRNOG00000020330	3491.15	0.158589	0.0728315	2.17748	0.0294449	0.0805272	ENSRNOG00000020330	Wdr47	WD repeat domain 47 [Source:RGD Symbol;Acc:1309181]
ENSRNOG00000017874	261.167	0.441442	0.121451	3.63473	0.000278269	0.0017577	ENSRNOG00000017874	Cd53	Cd53 molecule [Source:RGD Symbol;Acc:2310]
ENSRNOG00000040166	331.491	0.656553	0.149239	4.39933	1.08584e-05	0.000104647	ENSRNOG00000040166	Ankrd34b	ankyrin repeat domain 34B [Source:RGD Symbol;Acc:1594383]
ENSRNOG00000021216	911.314	0.1266	0.087147	1.45272	0.146301	0.275877	ENSRNOG00000021216	Pex11b	peroxisomal biogenesis factor 11 beta [Source:RGD Symbol;Acc:1310353]
ENSRNOG00000021209	227.887	-0.289847	0.154466	-1.87645	0.0605937	0.140954	ENSRNOG00000021209	Polr3gl	RNA polymerase III subunit GL [Source:RGD Symbol;Acc:1582857]
ENSRNOG00000067563	34.6934	0.548817	0.371121	1.47881	0.139191	0.265812	ENSRNOG00000067563
ENSRNOG00000020315	1105.57	0.188819	0.0832383	2.26842	0.0233036	0.0669325	ENSRNOG00000020315	Taf13	TATA-box binding protein associated factor 13 [Source:RGD Symbol;Acc:1305398]
ENSRNOG00000033741	1385.37	-0.303287	0.0762679	-3.9766	6.99066e-05	0.000533723	ENSRNOG00000033741	Ankrd34a	ankyrin repeat domain 34A [Source:RGD Symbol;Acc:1308412]
ENSRNOG00000068985	91.626	0.279305	0.220242	1.26817	0.204737	0.353146	ENSRNOG00000068985
ENSRNOG00000013055	303.046	0.225529	0.123346	1.82842	0.0674867	0.153365	ENSRNOG00000013055	Zfyve16	zinc finger FYVE-type containing 16 [Source:RGD Symbol;Acc:1564784]
ENSRNOG00000021181	755.448	-0.326034	0.0906619	-3.59615	0.000322958	0.00199769	ENSRNOG00000021181	Sf3b4	splicing factor 3B subunit 4 [Source:RGD Symbol;Acc:1309667]
ENSRNOG00000064070	48.5483	0.424712	0.291947	1.45476	0.145737	0.275131	ENSRNOG00000064070	Tmem267	transmembrane protein 267 [Source:RGD Symbol;Acc:1562550]
ENSRNOG00000070757	24.5349	0.408463	0.474342	0.861114	0.389176	0.551589	ENSRNOG00000070757
ENSRNOG00000067555	9158.89	0.339478	0.0612387	5.54352	2.96454e-08	5.62191e-07	ENSRNOG00000067555	Sub1	SUB1 regulator of transcription [Source:RGD Symbol;Acc:621582]
ENSRNOG00000019785	1077.24	0.0610005	0.0833954	0.731461	0.464498	0.620611	ENSRNOG00000019785	Phtf1	putative homeodomain transcription factor 1 [Source:RGD Symbol;Acc:620426]
ENSRNOG00000066880	460.545	0.434928	0.123807	3.51294	0.000443183	0.00259811	ENSRNOG00000066880
ENSRNOG00000068330	82.3886	0.399866	0.214669	1.86271	0.062503	0.14448	ENSRNOG00000068330
ENSRNOG00000066083	37.4818	0.382945	0.333285	1.149	0.250556	0.406492	ENSRNOG00000066083
ENSRNOG00000021213	926.438	-0.128222	0.0920779	-1.39254	0.16376	0.299873	ENSRNOG00000021213	Lix1l	limb and CNS expressed 1 like [Source:RGD Symbol;Acc:1593161]
ENSRNOG00000016306	262.241	0.20012	0.176378	1.13461	0.256538	0.412735	ENSRNOG00000016306	Adgrv1	adhesion G protein-coupled receptor V1 [Source:RGD Symbol;Acc:1562101]
ENSRNOG00000013217	1425.58	0.528663	0.0906374	5.83273	5.45278e-09	1.20149e-07	ENSRNOG00000013217	Ttc33	tetratricopeptide repeat domain 33 [Source:RGD Symbol;Acc:1564042]
ENSRNOG00000021324	141.184	0.34314	0.172707	1.98684	0.0469401	0.115526	ENSRNOG00000021324	C2h3orf33	similar to human chromosome 3 open reading frame 33 [Source:RGD Symbol;Acc:1565059]
ENSRNOG00000021201	748.979	-0.306036	0.143336	-2.13509	0.0327533	0.0875068	ENSRNOG00000021201	Txnip	thioredoxin interacting protein [Source:RGD Symbol;Acc:620886]
ENSRNOG00000011627	7396.66	0.392666	0.0520139	7.54925	4.37778e-14	2.93791e-12	ENSRNOG00000011627	Zfr	zinc finger RNA binding protein [Source:RGD Symbol;Acc:1311890]
ENSRNOG00000065416	26.8683	0.655107	0.388595	1.68584	0.0918271	0.195168	ENSRNOG00000065416
ENSRNOG00000020444	320.458	0.219816	0.13305	1.65213	0.098508	0.205539	ENSRNOG00000020444	Hcn3	hyperpolarization-activated cyclic nucleotide-gated potassium channel 3 [Source:RGD Symbol;Acc:620691]
ENSRNOG00000019780	77.937	0.0257815	0.265345	0.0971623	0.922597	0.95447	ENSRNOG00000019780	Sypl2	synaptophysin-like 2 [Source:RGD Symbol;Acc:1309907]
ENSRNOG00000012957	862.836	0.188211	0.0984091	1.91254	0.0558074	0.132462	ENSRNOG00000012957	Sh3glb1	SH3 domain -containing GRB2-like endophilin B1 [Source:RGD Symbol;Acc:1304859]
ENSRNOG00000031136	328.461	0.0300127	0.133842	0.224239	0.822571	0.891018	ENSRNOG00000031136	Ntng1	netrin G1 [Source:RGD Symbol;Acc:1563465]
ENSRNOG00000048118	371.867	0.145856	0.128703	1.13328	0.257098	0.413187	ENSRNOG00000048118	Ankra2	ankyrin repeat family A protein 2 [Source:RGD Symbol;Acc:11492057]
ENSRNOG00000010023	391.782	0.243272	0.107634	2.26017	0.0238109	0.0680834	ENSRNOG00000010023	Slc33a1	solute carrier family 33 member 1 [Source:RGD Symbol;Acc:620653]
ENSRNOG00000062746	375.219	0.226029	0.111416	2.02869	0.0424903	0.107281	ENSRNOG00000062746
ENSRNOG00000009899	1943.2	0.558661	0.0903327	6.18449	6.23037e-10	1.70906e-08	ENSRNOG00000009899	Skil	SKI-like proto-oncogene [Source:RGD Symbol;Acc:621399]
ENSRNOG00000040201	48.2639	0.799554	0.368118	2.172	0.0298554	0.0814375	ENSRNOG00000040201	Atp6ap1l	ATPase H+ transporting accessory protein 1 like [Source:RGD Symbol;Acc:1564936]
ENSRNOG00000068448	577.385	0.596469	0.0975195	6.11641	9.57063e-10	2.56211e-08	ENSRNOG00000068448	Arl15	ADP-ribosylation factor like GTPase 15 [Source:RGD Symbol;Acc:1597407]
ENSRNOG00000048363	64.1621	0.564851	0.345151	1.63654	0.101728	0.210546	ENSRNOG00000048363	Dnah5	dynein, axonemal, heavy chain 5 [Source:RGD Symbol;Acc:1560828]
ENSRNOG00000068328	157.54	-0.395733	0.391367	-1.01115	0.311942	0.473471	ENSRNOG00000068328	LOC120101245	small nucleolar RNA SNORA44 [Source:RGD Symbol;Acc:41123498]
ENSRNOG00000016298	145.227	1.30971	0.189097	6.92611	4.32571e-12	1.97438e-10	ENSRNOG00000016298	Lysmd3	LysM domain containing 3 [Source:RGD Symbol;Acc:1308805]
ENSRNOG00000019465	1024.5	0.106573	0.0808175	1.31869	0.187272	0.330889	ENSRNOG00000019465	Gnai3	G protein subunit alpha i3 [Source:RGD Symbol;Acc:2714]
ENSRNOG00000051151	393.989	-0.115023	0.105122	-1.09418	0.273875	0.431736	ENSRNOG00000051151	Gmps	guanine monophosphate synthase [Source:RGD Symbol;Acc:1310063]
ENSRNOG00000020360	660.12	-0.00318731	0.101548	-0.0313871	0.974961	0.985963	ENSRNOG00000020360	Clcc1	chloride channel CLIC-like 1 [Source:RGD Symbol;Acc:708359]
ENSRNOG00000014867	53.6158	0.228496	0.283651	0.805554	0.4205	0.582203	ENSRNOG00000014867	Synpo2	synaptopodin 2 [Source:RGD Symbol;Acc:1564779]
ENSRNOG00000018969	323.042	0.126976	0.142582	0.890552	0.37317	0.536395	ENSRNOG00000018969	Gpatch4	G patch domain containing 4 [Source:RGD Symbol;Acc:1311086]
ENSRNOG00000011951	4047.26	-0.182129	0.0694078	-2.62404	0.00868935	0.030421	ENSRNOG00000011951	Plk2	polo-like kinase 2 [Source:RGD Symbol;Acc:620760]
ENSRNOG00000019201	808.966	-0.346966	0.0760374	-4.56309	5.04055e-06	5.3334e-05	ENSRNOG00000019201	Naxe	NAD(P)HX epimerase [Source:RGD Symbol;Acc:1304699]
ENSRNOG00000009822	125.143	0.312707	0.222557	1.40506	0.160002	0.294644	ENSRNOG00000009822	Tlr2	toll-like receptor 2 [Source:RGD Symbol;Acc:735138]
ENSRNOG00000012422	1758.18	0.258167	0.0709038	3.6411	0.000271479	0.00172202	ENSRNOG00000012422	Tnik	TRAF2 and NCK interacting kinase [Source:RGD Symbol;Acc:1561817]
ENSRNOG00000012149	245.941	-0.229248	0.13277	-1.72665	0.0842299	0.182209	ENSRNOG00000012149	Gpsm2	G-protein signaling modulator 2 [Source:RGD Symbol;Acc:1560967]
ENSRNOG00000024461	66.7339	-0.354223	0.265636	-1.33349	0.182371	0.324964	ENSRNOG00000024461	Marchf11	membrane associated ring-CH-type finger 11 [Source:RGD Symbol;Acc:1559945]
ENSRNOG00000050877	618.009	-0.0742679	0.09544	-0.778164	0.436472	0.597007	ENSRNOG00000050877	Cetn3	centrin 3 [Source:RGD Symbol;Acc:620249]
ENSRNOG00000016451	26.5899	-0.00920659	0.392697	-0.0234445	0.981296	0.989578	ENSRNOG00000016451	Cd1d1	CD1d1 molecule [Source:RGD Symbol;Acc:2296]
ENSRNOG00000021170	1323.97	-0.194739	0.0693508	-2.80803	0.00498452	0.0194111	ENSRNOG00000021170	Plekho1	pleckstrin homology domain containing O1 [Source:RGD Symbol;Acc:1311487]
ENSRNOG00000024136	255.244	-0.0516223	0.139943	-0.368881	0.712217	0.817961	ENSRNOG00000024136	Fam151b	family with sequence similarity 151, member B [Source:RGD Symbol;Acc:1561110]
ENSRNOG00000013703	226.558	-0.126368	0.156749	-0.806181	0.420138	0.581922	ENSRNOG00000013703	Siah2	siah E3 ubiquitin protein ligase 2 [Source:RGD Symbol;Acc:620778]
ENSRNOG00000061328	52.0624	0.181897	0.315645	0.576272	0.564431	0.705878	ENSRNOG00000061328	Pag1	phosphoprotein membrane anchor with glycosphingolipid microdomains 1 [Source:RGD Symbol;Acc:620394]
ENSRNOG00000012183	1275.61	0.0615157	0.0896307	0.686324	0.492509	0.645767	ENSRNOG00000012183	Glrx	glutaredoxin [Source:RGD Symbol;Acc:70951]
ENSRNOG00000064517	21.4983	0.687065	0.464424	1.47939	0.139036	0.265585	ENSRNOG00000064517	Amy1	amylase alpha 1 [Source:RGD Symbol;Acc:2113]
ENSRNOG00000030639	718.242	0.101976	0.0943875	1.0804	0.279965	0.438195	ENSRNOG00000030639	Usp13	ubiquitin specific peptidase 13 [Source:RGD Symbol;Acc:1306044]
ENSRNOG00000043329	563.728	0.405544	0.0956846	4.23834	2.25176e-05	0.000200328	ENSRNOG00000043329	Rnf180	ring finger protein 180 [Source:RGD Symbol;Acc:1595064]
ENSRNOG00000017310	248.508	0.988681	0.15118	6.53977	6.16118e-11	2.15085e-09	ENSRNOG00000017310	Rnpc3	RNA-binding region (RNP1, RRM) containing 3 [Source:RGD Symbol;Acc:1582776]
ENSRNOG00000016591	608.278	0.344419	0.0969022	3.55429	0.000378996	0.00227816	ENSRNOG00000016591	Utp15	UTP15, small subunit processome component [Source:RGD Symbol;Acc:1310992]
ENSRNOG00000014051	1580.99	0.101598	0.0627344	1.6195	0.10534	0.216076	ENSRNOG00000014051	Pgrmc2	progesterone receptor membrane component 2 [Source:RGD Symbol;Acc:1308804]
ENSRNOG00000063678	696.63	0.286343	0.126187	2.2692	0.0232563	0.0668226	ENSRNOG00000063678	Mcl1	MCL1 apoptosis regulator, BCL2 family member [Source:RGD Symbol;Acc:620525]
ENSRNOG00000009949	115.324	-0.26837	0.194554	-1.37941	0.167768	0.305478	ENSRNOG00000009949	Pcdh18	protocadherin 18 [Source:RGD Symbol;Acc:1305870]
ENSRNOG00000051480	1439.03	0.3569	0.0650982	5.48249	4.19389e-08	7.78252e-07	ENSRNOG00000051480	Fxr1	FMR1 autosomal homolog 1 [Source:RGD Symbol;Acc:1311733]
ENSRNOG00000012799	505.187	0.902504	0.106899	8.44263	3.10286e-17	3.61927e-15	ENSRNOG00000012799	Prkaa1	protein kinase AMP-activated catalytic subunit alpha 1 [Source:RGD Symbol;Acc:3387]
ENSRNOG00000020923	35.3118	0.230941	0.371874	0.621019	0.534587	0.681898	ENSRNOG00000020923	Tuft1	tuftelin 1 [Source:RGD Symbol;Acc:1310373]
ENSRNOG00000018297	513.885	-0.016573	0.116287	-0.142519	0.88667	0.932612	ENSRNOG00000018297	Ocln	occludin [Source:RGD Symbol;Acc:620089]
ENSRNOG00000026845	20.5541	0.714025	0.48424	1.47453	0.14034	0.267554	ENSRNOG00000026845	Fam81b	family with sequence similarity 81, member B [Source:RGD Symbol;Acc:1561830]
ENSRNOG00000012414	212.54	0.508833	0.140202	3.62929	0.000284207	0.00178849	ENSRNOG00000012414	Rhobtb3	Rho-related BTB domain containing 3 [Source:RGD Symbol;Acc:1311683]
ENSRNOG00000011032	707.699	-0.00616036	0.100533	-0.0612772	0.951138	0.972707	ENSRNOG00000011032	Lhfpl2	LHFPL tetraspan subfamily member 2 [Source:RGD Symbol;Acc:1309869]
ENSRNOG00000020952	55.5271	0.239526	0.292633	0.818522	0.413059	0.575261	ENSRNOG00000020952	Cgn	cingulin [Source:RGD Symbol;Acc:1311992]
[truncated: 12,699 more rows]

## Sheet: age_TG
ensembl_geneID	baseMean	log2FoldChange	lfcSE	stat	pvalue	padj	ensembl	rgd_symbol	description
ENSRNOG00000070901	3170.3	-0.163913	0.0463737	-3.53461	0.000408371	0.00363307	ENSRNOG00000070901	Irgq	immunity-related GTPase Q [Source:RGD Symbol;Acc:1309409]
ENSRNOG00000018029	109.555	0.259635	0.130289	1.99277	0.0462869	0.140903	ENSRNOG00000018029	Doc2g	double C2-like domains, gamma [Source:RGD Symbol;Acc:1307473]
ENSRNOG00000032625	249.221	0.00260937	0.107932	0.024176	0.980712	0.991438	ENSRNOG00000032625	Zfp108	zinc finger protein 108 [Source:RGD Symbol;Acc:1564214]
ENSRNOG00000029315	98.0168	-0.00212137	0.144434	-0.0146875	0.988282	0.995666	ENSRNOG00000029315	LOC690251	similar to SUMO/sentrin specific protease 5 [Source:RGD Symbol;Acc:1582860]
ENSRNOG00000016356	8427.29	0.0470577	0.0517216	0.909828	0.362913	0.570453	ENSRNOG00000016356	Got1	glutamic-oxaloacetic transaminase 1 [Source:RGD Symbol;Acc:2721]
ENSRNOG00000015810	32.286	0.286168	0.277252	1.03216	0.301998	0.509057	ENSRNOG00000015810	Trip13	thyroid hormone receptor interactor 13 [Source:RGD Symbol;Acc:1308516]
ENSRNOG00000017538	87.6995	0.215465	0.162127	1.32899	0.183851	0.368077	ENSRNOG00000017538	Lrrc27	leucine rich repeat containing 27 [Source:RGD Symbol;Acc:1559981]
ENSRNOG00000027204	1741.26	-0.183003	0.0660257	-2.77169	0.00557655	0.0293758	ENSRNOG00000027204	Map6	microtubule-associated protein 6 [Source:RGD Symbol;Acc:61804]
ENSRNOG00000070886	1110	0.12259	0.0576853	2.12515	0.0335742	0.111085	ENSRNOG00000070886
ENSRNOG00000014903	2424.51	0.0581091	0.0442543	1.31307	0.189158	0.375378	ENSRNOG00000014903	Zfyve27	zinc finger FYVE-type containing 27 [Source:RGD Symbol;Acc:735177]
ENSRNOG00000021051	1873.04	-0.0787658	0.0477098	-1.65093	0.098752	0.240889	ENSRNOG00000021051	Cyth2	cytohesin 2 [Source:RGD Symbol;Acc:620398]
ENSRNOG00000011160	10378.2	-0.0382116	0.0700095	-0.545806	0.585199	0.757502	ENSRNOG00000011160	Sv2b	synaptic vesicle glycoprotein 2b [Source:RGD Symbol;Acc:619716]
ENSRNOG00000017748	64.2258	9.96825e-05	0.205793	0.000484382	0.999614	0.999682	ENSRNOG00000017748	Nkx6-2	NK6 homeobox 2 [Source:RGD Symbol;Acc:1307280]
ENSRNOG00000016227	2149.01	-0.205273	0.0514783	-3.98758	6.6752e-05	0.000816184	ENSRNOG00000016227	Glrx3	glutaredoxin 3 [Source:RGD Symbol;Acc:69414]
ENSRNOG00000016906	63.519	-0.258108	0.203098	-1.27085	0.203781	0.394906	ENSRNOG00000016906	Lipt2	lipoyl(octanoyl) transferase 2 [Source:RGD Symbol;Acc:1305211]
ENSRNOG00000027582	1180	-0.0203668	0.0975034	-0.208883	0.834539	0.917232	ENSRNOG00000027582	Dpysl4	dihydropyrimidinase-like 4 [Source:RGD Symbol;Acc:2409]
ENSRNOG00000009830	305.795	0.254401	0.0883446	2.87964	0.0039813	0.0225137	ENSRNOG00000009830	Fam204a	family with sequence similarity 204, member A [Source:RGD Symbol;Acc:1305500]
ENSRNOG00000013767	105.628	0.0551341	0.159874	0.344859	0.730201	0.855188	ENSRNOG00000013767	Ccdc61	coiled-coil domain containing 61 [Source:RGD Symbol;Acc:1307390]
ENSRNOG00000067619	31.0446	-0.2149	0.27714	-0.77542	0.438091	0.637993	ENSRNOG00000067619
ENSRNOG00000032699	24757.2	-0.220406	0.057549	-3.82988	0.000128204	0.00141139	ENSRNOG00000032699	Ttyh1	tweety family member 1 [Source:RGD Symbol;Acc:1310103]
ENSRNOG00000018408	570.834	0.0567899	0.0785079	0.723365	0.469456	0.664569	ENSRNOG00000018408	RGD1307554	similar to CG16812-PA [Source:RGD Symbol;Acc:1307554]
ENSRNOG00000018334	135.306	0.0472023	0.13271	0.35568	0.72208	0.850285	ENSRNOG00000018334	Ctu1	cytosolic thiouridylase subunit 1 [Source:RGD Symbol;Acc:1308740]
ENSRNOG00000067907	433.727	-0.087269	0.111157	-0.785098	0.432396	0.633634	ENSRNOG00000067907
ENSRNOG00000023407	413.757	-0.132001	0.0809654	-1.63034	0.103029	0.247503	ENSRNOG00000023407	Mrpl36	mitochondrial ribosomal protein L36 [Source:RGD Symbol;Acc:1306375]
ENSRNOG00000010529	35.9635	0.510408	0.311405	1.63905	0.101203	0.244714	ENSRNOG00000010529	Thbs2	thrombospondin 2 [Source:RGD Symbol;Acc:1310979]
ENSRNOG00000012684	846.701	-0.11681	0.0622237	-1.87726	0.0604819	0.170779	ENSRNOG00000012684	Bloc1s2	biogenesis of lysosomal organelles complex-1, subunit 2 [Source:RGD Symbol;Acc:1306551]
ENSRNOG00000014258	66.2333	0.0146654	0.190257	0.077082	0.938558	0.970451	ENSRNOG00000014258	Rab32	RAB32, member RAS oncogene family [Source:RGD Symbol;Acc:1559997]
ENSRNOG00000010918	132.505	0.00306544	0.150024	0.0204331	0.983698	0.992749	ENSRNOG00000010918	Cebpa	CCAAT/enhancer binding protein alpha [Source:RGD Symbol;Acc:2326]
ENSRNOG00000067027	56.4514	0.242263	0.2136	1.13419	0.256714	0.460451	ENSRNOG00000067027	LOC108349691	histone H3.3-like [Source:RGD Symbol;Acc:11381356]
ENSRNOG00000019416	749.433	0.111215	0.0821569	1.35369	0.175834	0.357036	ENSRNOG00000019416	Zfp61	zinc finger protein 94 [Source:RGD Symbol;Acc:1560430]
ENSRNOG00000014946	1215.29	-0.0667071	0.0575683	-1.15875	0.24656	0.44843	ENSRNOG00000014946	Thumpd1	THUMP domain containing 1 [Source:RGD Symbol;Acc:1308854]
ENSRNOG00000020318	421.773	0.0332438	0.091819	0.362058	0.717309	0.847519	ENSRNOG00000020318	Pnkp	polynucleotide kinase 3'-phosphatase [Source:RGD Symbol;Acc:1303331]
ENSRNOG00000047406	280.634	-0.0424451	0.0965292	-0.439712	0.660146	0.809728	ENSRNOG00000047406	Cfap90	cilia and flagella associated protein 90 [Source:RGD Symbol;Acc:1308544]
ENSRNOG00000050445	4407.27	-0.0838638	0.0385745	-2.17408	0.0296995	0.101429	ENSRNOG00000050445	Gde1	glycerophosphodiester phosphodiesterase 1 [Source:RGD Symbol;Acc:621788]
ENSRNOG00000013945	349.886	-0.270171	0.0972331	-2.77859	0.00545957	0.028905	ENSRNOG00000013945	Itpkc	inositol-trisphosphate 3-kinase C [Source:RGD Symbol;Acc:631336]
ENSRNOG00000031947	53.4057	0.0868176	0.204975	0.423553	0.671892	0.818398	ENSRNOG00000031947	LOC100361060	ribosomal protein L36-like [Source:RGD Symbol;Acc:2320900]
ENSRNOG00000016565	133.864	-0.0500268	0.137418	-0.36405	0.715821	0.846237	ENSRNOG00000016565	Zfp524	zinc finger protein 524 [Source:RGD Symbol;Acc:1565485]
ENSRNOG00000019138	834.395	-0.210188	0.0631076	-3.33063	0.000866508	0.00664323	ENSRNOG00000019138	Clec11a	C-type lectin domain containing 11A [Source:RGD Symbol;Acc:3627]
ENSRNOG00000065728	48.1016	0.227068	0.217435	1.04431	0.296344	0.502609	ENSRNOG00000065728
ENSRNOG00000065649	239.339	0.153366	0.107933	1.42093	0.155337	0.328628	ENSRNOG00000065649	Zfp94	zinc finger protein 94 [Source:RGD Symbol;Acc:1560430]
ENSRNOG00000064423	54.3746	2.19593	0.241789	9.08202	1.06574e-19	4.12189e-17	ENSRNOG00000064423	LOC685793	similar to serine/threonine kinase [Source:RGD Symbol;Acc:1590175]
ENSRNOG00000016574	486.695	-0.196971	0.0755187	-2.60825	0.0091007	0.0421402	ENSRNOG00000016574	Fiz1	FLT3-interacting zinc finger 1 [Source:RGD Symbol;Acc:1306359]
ENSRNOG00000055971	218.615	0.0341358	0.103196	0.330784	0.740807	0.861544	ENSRNOG00000055971	AABR07000544.1
ENSRNOG00000055608	1440.36	-0.20409	0.0457515	-4.46083	8.16429e-06	0.000139524	ENSRNOG00000055608	LOC102548695	zinc finger protein 45-like [Source:RGD Symbol;Acc:7529325]
ENSRNOG00000013641	24.6872	-0.0480816	0.298035	-0.161329	0.871834	0.936101	ENSRNOG00000013641	Myo7a	myosin VIIA [Source:RGD Symbol;Acc:628830]
ENSRNOG00000020347	1071.76	-0.00860691	0.0565255	-0.152266	0.878977	0.940061	ENSRNOG00000020347	Nup98	nucleoporin 98 and 96 precursor [Source:RGD Symbol;Acc:71033]
ENSRNOG00000065259	91.3351	-0.0512579	0.162945	-0.314571	0.753087	0.868143	ENSRNOG00000065259
ENSRNOG00000066571	24.5621	0.17177	0.272655	0.629992	0.5287	0.712545	ENSRNOG00000066571
ENSRNOG00000016608	126.563	0.0219257	0.147689	0.148459	0.881981	0.941212	ENSRNOG00000016608	Zfp579	zinc finger protein 579 [Source:RGD Symbol;Acc:1308475]
ENSRNOG00000012730	176.15	0.113915	0.118846	0.958516	0.337803	0.54563	ENSRNOG00000012730	Lrrk1	leucine-rich repeat kinase 1 [Source:RGD Symbol;Acc:1308000]
ENSRNOG00000018117	3505.65	-0.148611	0.0447984	-3.31733	0.000908823	0.00690997	ENSRNOG00000018117	Ndufv1	NADH:ubiquinone oxidoreductase core subunit V1 [Source:RGD Symbol;Acc:1359247]
ENSRNOG00000016362	134.282	-0.34294	0.160676	-2.13435	0.0328138	0.109456	ENSRNOG00000016362	Gpr4	G protein-coupled receptor 4 [Source:RGD Symbol;Acc:1311604]
ENSRNOG00000017307	156.174	0.143644	0.13177	1.09011	0.275665	0.481293	ENSRNOG00000017307	Prss23	serine protease 23 [Source:RGD Symbol;Acc:1359545]
ENSRNOG00000020942	48.4246	0.453971	0.234748	1.93386	0.0531301	0.155797	ENSRNOG00000020942	Plekha4	pleckstrin homology domain containing A4 [Source:RGD Symbol;Acc:735133]
ENSRNOG00000017079	4432.83	-0.028347	0.0610198	-0.464555	0.64225	0.797698	ENSRNOG00000017079	Pgm2l1	phosphoglucomutase 2-like 1 [Source:RGD Symbol;Acc:1583226]
ENSRNOG00000017795	1314.27	0.104192	0.0743044	1.40223	0.160848	0.336989	ENSRNOG00000017795	Hspbp1	HSPA (Hsp70) binding protein 1 [Source:RGD Symbol;Acc:628677]
ENSRNOG00000052607	21.1088	0.62183	0.346155	1.79639	0.0724319	0.193762	ENSRNOG00000052607	Snora12	small nucleolar RNA, H/ACA box 12 [Source:RGD Symbol;Acc:41366654]
ENSRNOG00000052319	589.412	-0.339879	0.0729746	-4.65749	3.20086e-06	6.30604e-05	ENSRNOG00000052319	AABR07004881.1
ENSRNOG00000027542	93.4687	0.0102909	0.167518	0.0614314	0.951016	0.976752	ENSRNOG00000027542	LOC100302465	hypothetical LOC100302465 [Source:RGD Symbol;Acc:2311471]
ENSRNOG00000065457	78.151	0.159374	0.223651	0.712602	0.476092	0.670287	ENSRNOG00000065457
ENSRNOG00000021478	578.935	-0.107706	0.077326	-1.39289	0.163654	0.340779	ENSRNOG00000021478	Tpd52l1	TPD52 like 1 [Source:RGD Symbol;Acc:1594796]
ENSRNOG00000018090	2755.24	-0.0534341	0.0403646	-1.32379	0.185574	0.370367	ENSRNOG00000018090	Ppp6r1	protein phosphatase 6, regulatory subunit 1 [Source:RGD Symbol;Acc:1311409]
ENSRNOG00000069157	164.364	0.0504264	0.121364	0.415496	0.677779	0.821748	ENSRNOG00000069157	Chchd4	coiled-coil-helix-coiled-coil-helix domain containing 4 [Source:RGD Symbol;Acc:1310746]
ENSRNOG00000015230	342.005	0.247654	0.084664	2.92513	0.00344308	0.0201524	ENSRNOG00000015230	Ermard	ER membrane-associated RNA degradation [Source:RGD Symbol;Acc:1309374]
ENSRNOG00000017069	1467.72	-0.116727	0.0554918	-2.10349	0.0354226	0.115613	ENSRNOG00000017069	Mark4	microtubule affinity regulating kinase 4 [Source:RGD Symbol;Acc:1591792]
ENSRNOG00000021013	327.826	0.225491	0.0961998	2.34399	0.0190789	0.0729646	ENSRNOG00000021013	Stx3	syntaxin 3 [Source:RGD Symbol;Acc:621005]
ENSRNOG00000066830	23.0494	0.480501	0.303079	1.5854	0.112876	0.2637	ENSRNOG00000066830
ENSRNOG00000018677	1948.54	-0.23376	0.0546518	-4.27726	1.89206e-05	0.000275596	ENSRNOG00000018677	Akt2	AKT serine/threonine kinase 2 [Source:RGD Symbol;Acc:2082]
ENSRNOG00000019207	17440.2	-0.181688	0.0521099	-3.48664	0.000489134	0.00418928	ENSRNOG00000019207	Shank1	SH3 and multiple ankyrin repeat domains 1 [Source:RGD Symbol;Acc:621011]
ENSRNOG00000070234	258.687	0.475717	0.0990726	4.80171	1.57319e-06	3.36552e-05	ENSRNOG00000070234	Zfp141	zinc finger protein 141 [Source:RGD Symbol;Acc:1597345]
ENSRNOG00000063629	203.364	0.244349	0.111325	2.19493	0.0281688	0.0975573	ENSRNOG00000063629
ENSRNOG00000016714	20.3883	0.615357	0.350666	1.75483	0.0792892	0.206543	ENSRNOG00000016714	Nrap	nebulin-related anchoring protein [Source:RGD Symbol;Acc:1306731]
ENSRNOG00000067256	42.6703	2.71586	0.318127	8.53701	1.37744e-17	3.74894e-15	ENSRNOG00000067256
ENSRNOG00000015734	750.121	0.553673	0.083279	6.64841	2.96273e-11	2.29175e-09	ENSRNOG00000015734	Ube3a	ubiquitin protein ligase E3A [Source:RGD Symbol;Acc:1306361]
ENSRNOG00000068800	351.874	0.198363	0.105819	1.87456	0.0608537	0.171565	ENSRNOG00000068800
ENSRNOG00000069276	191.663	0.186452	0.107049	1.74175	0.0815528	0.210906	ENSRNOG00000069276	LOC102548320	zinc finger protein 845-like [Source:RGD Symbol;Acc:7683572]
ENSRNOG00000062961	65.1861	0.513156	0.232941	2.20294	0.0275989	0.0960882	ENSRNOG00000062961
ENSRNOG00000049772	212.012	-0.0497752	0.107538	-0.46286	0.643465	0.798531	ENSRNOG00000049772	Gemin7	gem (nuclear organelle) associated protein 7 [Source:RGD Symbol;Acc:1597035]
ENSRNOG00000053859	796.142	0.0339375	0.0895746	0.378874	0.704781	0.840556	ENSRNOG00000053859	Ranbp6	RAN binding protein 6 [Source:RGD Symbol;Acc:1305165]
ENSRNOG00000066647	21.6926	-0.16546	0.32312	-0.51207	0.608602	0.775936	ENSRNOG00000066647
ENSRNOG00000066887	104.135	0.121706	0.154855	0.785936	0.431905	0.633275	ENSRNOG00000066887	LOC102556805	rho GTPase-activating protein 20-like [Source:RGD Symbol;Acc:7734973]
ENSRNOG00000018915	29.2168	0.0627901	0.272225	0.230655	0.817583	0.907828	ENSRNOG00000018915	Tagap	T-cell activation RhoGTPase activating protein [Source:RGD Symbol;Acc:1308618]
ENSRNOG00000020358	2051.98	0.394557	0.082028	4.81003	1.50911e-06	3.24261e-05	ENSRNOG00000020358	Ptov1	PTOV1, extended AT-hook containing adaptor protein [Source:RGD Symbol;Acc:1306977]
ENSRNOG00000053502	3658.21	-0.00445933	0.0581778	-0.0766501	0.938902	0.970601	ENSRNOG00000053502	Arhgef17	Rho guanine nucleotide exchange factor 17 [Source:RGD Symbol;Acc:1309890]
ENSRNOG00000021442	178.328	-0.0128669	0.111183	-0.115727	0.907869	0.954498	ENSRNOG00000021442	Hddc2	HD domain containing 2 [Source:RGD Symbol;Acc:1307562]
ENSRNOG00000066023	234.18	0.324053	0.105248	3.07895	0.00207729	0.0134731	ENSRNOG00000066023
ENSRNOG00000014278	483.814	-0.117443	0.0817409	-1.43677	0.150784	0.321325	ENSRNOG00000014278	Zfp710	zinc finger protein 710 [Source:RGD Symbol;Acc:1306491]
ENSRNOG00000022921	2873.37	-0.184541	0.0739521	-2.49541	0.012581	0.0539235	ENSRNOG00000022921	Dact2	dishevelled-binding antagonist of beta-catenin 2 [Source:RGD Symbol;Acc:1310742]
ENSRNOG00000037360	32.8892	0.207669	0.252882	0.821212	0.411525	0.614528	ENSRNOG00000037360	AABR07003173.1
ENSRNOG00000015902	38.6713	-0.402108	0.270308	-1.48759	0.136859	0.30075	ENSRNOG00000015902	Cpxm2	carboxypeptidase X (M14 family), member 2 [Source:RGD Symbol;Acc:1310955]
ENSRNOG00000065017	48.6184	0.19615	0.236428	0.829638	0.406744	0.610489	ENSRNOG00000065017
ENSRNOG00000020624	1385.41	0.347851	0.0571745	6.08401	1.17212e-09	6.40395e-08	ENSRNOG00000020624	Acadsb	acyl-CoA dehydrogenase, short/branched chain [Source:RGD Symbol;Acc:2013]
ENSRNOG00000013981	3691.6	0.095839	0.0548543	1.74716	0.0806102	0.209094	ENSRNOG00000013981	Ptpn5	protein tyrosine phosphatase, non-receptor type 5 [Source:RGD Symbol;Acc:3448]
ENSRNOG00000065346	72.2387	-0.204451	0.187777	-1.0888	0.276243	0.481771	ENSRNOG00000065346
ENSRNOG00000062884	23.1665	0.751567	0.368122	2.04163	0.0411886	0.129548	ENSRNOG00000062884
ENSRNOG00000019942	27.6166	-0.15121	0.311023	-0.486169	0.626847	0.788023	ENSRNOG00000019942	Fbxo17	F-box protein 17 [Source:RGD Symbol;Acc:1308308]
ENSRNOG00000059083	157.668	-0.0956192	0.289856	-0.329885	0.741487	0.861672	ENSRNOG00000059083	LOC120100370	small nucleolar RNA SNORA44 [Source:RGD Symbol;Acc:41111402]
ENSRNOG00000030818	814.128	-0.10401	0.0642068	-1.61992	0.105249	0.251111	ENSRNOG00000030818	C1h11orf42	similar to human chromosome 11 open reading frame 42 [Source:RGD Symbol;Acc:1561034]
ENSRNOG00000071202	35.9682	0.747173	0.296528	2.51974	0.0117443	0.0511879	ENSRNOG00000071202
ENSRNOG00000064515	891.078	0.100536	0.0584272	1.7207	0.0853046	0.21763	ENSRNOG00000064515
ENSRNOG00000017930	852.955	-0.178472	0.0724087	-2.46479	0.0137093	0.0573891	ENSRNOG00000017930	Lpcat1	lysophosphatidylcholine acyltransferase 1 [Source:RGD Symbol;Acc:1311599]
ENSRNOG00000063371	146.338	-0.0240497	0.128376	-0.187338	0.851396	0.92531	ENSRNOG00000063371
ENSRNOG00000068809	234.803	0.0616241	0.103845	0.593426	0.552896	0.731493	ENSRNOG00000068809
ENSRNOG00000019869	822.499	0.0720832	0.0793813	0.908063	0.363845	0.571367	ENSRNOG00000019869	Lrfn1	leucine rich repeat and fibronectin type III domain containing 1 [Source:RGD Symbol;Acc:1304707]
ENSRNOG00000067318	210.274	0.138132	0.119222	1.15861	0.246615	0.44843	ENSRNOG00000067318
ENSRNOG00000023411	317.036	0.15618	0.0942754	1.65663	0.0975934	0.239414	ENSRNOG00000023411	Vsig10l	V-set and immunoglobulin domain containing 10 like [Source:RGD Symbol;Acc:1564982]
ENSRNOG00000046005	91001.5	-0.147969	0.0633492	-2.33577	0.0195035	0.0740678	ENSRNOG00000046005	Scd2	stearoyl-Coenzyme A desaturase 2 [Source:RGD Symbol;Acc:621177]
ENSRNOG00000018686	2159.27	0.237756	0.0661277	3.59541	0.000323881	0.00301844	ENSRNOG00000018686	Atxn2l	ataxin 2-like [Source:RGD Symbol;Acc:1565868]
ENSRNOG00000063261	244.129	-0.178012	0.106274	-1.67503	0.0939283	0.233147	ENSRNOG00000063261
ENSRNOG00000069563	27.3068	0.274806	0.277949	0.988694	0.322813	0.530691	ENSRNOG00000069563
ENSRNOG00000017408	821.501	-0.0501401	0.0812688	-0.616966	0.537257	0.719084	ENSRNOG00000017408	Fhip1b	FHF complex subunit HOOK interacting protein 1B [Source:RGD Symbol;Acc:1359585]
ENSRNOG00000021794	240.358	0.00816764	0.122878	0.0664694	0.947004	0.975	ENSRNOG00000021794	Znhit2	zinc finger, HIT-type containing 2 [Source:RGD Symbol;Acc:1307918]
ENSRNOG00000069938	29.9419	0.0121521	0.294497	0.041264	0.967085	0.984938	ENSRNOG00000069938
ENSRNOG00000013949	1598.8	-0.0822473	0.0592093	-1.38909	0.164804	0.342729	ENSRNOG00000013949	Idh2	isocitrate dehydrogenase (NADP(+)) 2 [Source:RGD Symbol;Acc:1597139]
ENSRNOG00000065858	140.233	0.218708	0.123269	1.77424	0.0760232	0.200701	ENSRNOG00000065858
ENSRNOG00000016103	268.126	-0.0881424	0.11485	-0.767456	0.442811	0.64246	ENSRNOG00000016103	Nkd2	NKD inhibitor of WNT signaling pathway 2 [Source:RGD Symbol;Acc:1311459]
ENSRNOG00000020643	760.91	-0.13526	0.0729671	-1.85371	0.0637811	0.177301	ENSRNOG00000020643	Bub3	BUB3 mitotic checkpoint protein [Source:RGD Symbol;Acc:1306654]
ENSRNOG00000018217	85.7971	0.0446446	0.169705	0.263072	0.792495	0.893266	ENSRNOG00000018217	Syt5	synaptotagmin 5 [Source:RGD Symbol;Acc:3806]
ENSRNOG00000058790	1864.63	-0.0977438	0.046045	-2.12279	0.0337715	0.111612	ENSRNOG00000058790	Fam120b	family with sequence similarity 120B [Source:RGD Symbol;Acc:1310304]
ENSRNOG00000020371	85.4092	0.182531	0.175045	1.04276	0.297057	0.503326	ENSRNOG00000020371	Pgap2	post-GPI attachment to proteins 2 [Source:RGD Symbol;Acc:619744]
ENSRNOG00000014996	137.749	-0.154106	0.132867	-1.15985	0.24611	0.448166	ENSRNOG00000014996	Katna1	katanin catalytic subunit A1 [Source:RGD Symbol;Acc:1303062]
ENSRNOG00000067296	340.597	0.115315	0.0848023	1.35981	0.17389	0.354683	ENSRNOG00000067296	LOC108348090	zinc finger protein OZF-like [Source:RGD Symbol;Acc:11436011]
ENSRNOG00000017914	348.541	-0.195995	0.113064	-1.73349	0.083009	0.213596	ENSRNOG00000017914	Cavin3	caveolae associated protein 3 [Source:RGD Symbol;Acc:628755]
ENSRNOG00000014705	84.8289	-0.0977285	0.205265	-0.47611	0.633996	0.792614	ENSRNOG00000014705	Rbm20	RNA binding motif protein 20 [Source:RGD Symbol;Acc:1307427]
ENSRNOG00000070027	234.639	-0.240842	0.110346	-2.1826	0.029065	0.0998057	ENSRNOG00000070027
ENSRNOG00000009932	130.655	0.224037	0.154397	1.45104	0.146768	0.315774	ENSRNOG00000009932	Mctp2	multiple C2 and transmembrane domain containing 2 [Source:RGD Symbol;Acc:1562967]
ENSRNOG00000020865	90.4268	-0.0376902	0.188377	-0.200079	0.841419	0.920617	ENSRNOG00000020865	Ano1	anoctamin 1 [Source:RGD Symbol;Acc:1310786]
ENSRNOG00000020714	410.57	0.0413784	0.0890096	0.464875	0.642021	0.797547	ENSRNOG00000020714	Trpm4	transient receptor potential cation channel, subfamily M, member 4 [Source:RGD Symbol;Acc:620244]
ENSRNOG00000015825	554.353	0.402281	0.0773762	5.19903	2.00333e-07	5.706e-06	ENSRNOG00000015825	Aurkc	aurora kinase C [Source:RGD Symbol;Acc:1309573]
ENSRNOG00000014840	70.0266	0.414848	0.215549	1.92462	0.0542775	0.158371	ENSRNOG00000014840	Gna14	G protein subunit alpha 14 [Source:RGD Symbol;Acc:1308122]
ENSRNOG00000064970	119.275	-0.0351572	0.161251	-0.218028	0.827408	0.912122	ENSRNOG00000064970	Zfp939	zinc finger protein 939 [Source:RGD Symbol;Acc:1584032]
ENSRNOG00000030127	2463.21	0.00409281	0.0542496	0.0754441	0.939861	0.971115	ENSRNOG00000030127	Eml2	EMAP like 2 [Source:RGD Symbol;Acc:621066]
ENSRNOG00000027098	6185.5	-0.0745269	0.0553106	-1.34742	0.177843	0.359825	ENSRNOG00000027098	Sez6l2	seizure related 6 homolog like 2 [Source:RGD Symbol;Acc:1565281]
ENSRNOG00000017311	863.51	0.0714515	0.0782249	0.913411	0.361027	0.568156	ENSRNOG00000017311	Me3	malic enzyme 3 [Source:RGD Symbol;Acc:1311070]
ENSRNOG00000019270	76.0665	-0.182471	0.199458	-0.914838	0.360277	0.567584	ENSRNOG00000019270	P2ry6	pyrimidinergic receptor P2Y6 [Source:RGD Symbol;Acc:620269]
ENSRNOG00000066986	144.859	0.237474	0.138781	1.71114	0.0870551	0.220595	ENSRNOG00000066986	Zfp619	zinc finger protein 619 [Source:RGD Symbol;Acc:7710512]
ENSRNOG00000018762	69.1082	-0.178284	0.192584	-0.925745	0.354578	0.5616	ENSRNOG00000018762	Rsph3	radial spoke head 3 [Source:RGD Symbol;Acc:1311306]
ENSRNOG00000015956	1857.25	0.0276473	0.0525782	0.525831	0.599005	0.768514	ENSRNOG00000015956	Usp29	ubiquitin specific peptidase 29 [Source:RGD Symbol;Acc:1306648]
ENSRNOG00000018019	6719.24	-0.040636	0.0479118	-0.84814	0.39636	0.601104	ENSRNOG00000018019	Hspa12a	heat shock protein family A (Hsp70) member 12A [Source:RGD Symbol;Acc:1305531]
ENSRNOG00000046036	46.4272	0.0074403	0.22849	0.0325629	0.974023	0.988211	ENSRNOG00000046036	Itprip	inositol 1,4,5-trisphosphate receptor interacting protein [Source:RGD Symbol;Acc:6488464]
ENSRNOG00000016372	110.221	-0.103031	0.161451	-0.638156	0.523372	0.708613	ENSRNOG00000016372	Slc12a7	solute carrier family 12 member 7 [Source:RGD Symbol;Acc:1359672]
ENSRNOG00000064277	35.0505	0.294477	0.303989	0.968711	0.332689	0.541145	ENSRNOG00000064277
ENSRNOG00000068327	596.646	-0.322177	0.0722537	-4.45897	8.23537e-06	0.000140575	ENSRNOG00000068327	Pdcd5	programmed cell death 5 [Source:RGD Symbol;Acc:1310561]
ENSRNOG00000019812	1011.78	-0.112484	0.0638622	-1.76135	0.0781795	0.204486	ENSRNOG00000019812	Nr1h2	nuclear receptor subfamily 1, group H, member 2 [Source:RGD Symbol;Acc:61906]
ENSRNOG00000070842	49.3763	0.644312	0.228256	2.82276	0.00476128	0.0259653	ENSRNOG00000070842
ENSRNOG00000025940	1711.67	-0.164981	0.0613441	-2.68944	0.00715731	0.0353769	ENSRNOG00000025940	Mettl9	methyltransferase like 9 [Source:RGD Symbol;Acc:2311609]
ENSRNOG00000020393	621.554	-0.144146	0.0720497	-2.00065	0.0454303	0.138899	ENSRNOG00000020393	Rhog	ras homolog family member G [Source:RGD Symbol;Acc:621310]
ENSRNOG00000067076	144.801	-0.245618	0.138056	-1.77911	0.0752218	0.199193	ENSRNOG00000067076	Frat1	FRAT regulator of WNT signaling pathway 1 [Source:RGD Symbol;Acc:9147096]
ENSRNOG00000014969	492.529	0.0252082	0.0687198	0.366826	0.713749	0.845026	ENSRNOG00000014969	Lzts2	leucine zipper tumor suppressor 2 [Source:RGD Symbol;Acc:1359249]
ENSRNOG00000010840	43.8042	0.503322	0.27136	1.85481	0.0636232	0.176929	ENSRNOG00000010840	Adamtsl3	ADAMTS-like 3 [Source:RGD Symbol;Acc:1305155]
ENSRNOG00000067278	385.857	0.218761	0.119326	1.8333	0.0667587	0.183359	ENSRNOG00000067278	LOC108349532	high mobility group protein B1 pseudogene [Source:RGD Symbol;Acc:11382437]
ENSRNOG00000010308	154.18	0.210303	0.128629	1.63496	0.102058	0.246135	ENSRNOG00000010308	Nr2f2	nuclear receptor subfamily 2, group F, member 2 [Source:RGD Symbol;Acc:69305]
ENSRNOG00000017851	138.03	-0.0834731	0.151931	-0.549417	0.58272	0.755558	ENSRNOG00000017851	Etfb	electron transfer flavoprotein subunit beta [Source:RGD Symbol;Acc:1303312]
ENSRNOG00000011439	435.843	-0.116127	0.0925486	-1.25477	0.209562	0.401949	ENSRNOG00000011439	Grk5	G protein-coupled receptor kinase 5 [Source:RGD Symbol;Acc:61985]
ENSRNOG00000017635	976.171	-0.0348801	0.0599523	-0.581797	0.560703	0.738531	ENSRNOG00000017635	Inpp5a	inositol polyphosphate-5-phosphatase A [Source:RGD Symbol;Acc:1306168]
ENSRNOG00000056397	24.5967	0.246989	0.339979	0.726485	0.467542	0.663332	ENSRNOG00000056397	LOC120100233	small nucleolar RNA SNORD22 [Source:RGD Symbol;Acc:40941034]
ENSRNOG00000068081	252.992	0.121971	0.110221	1.10661	0.268464	0.473382	ENSRNOG00000068081
ENSRNOG00000065098	1456.58	0.139936	0.063008	2.22093	0.0263559	0.0928201	ENSRNOG00000065098	Hmgb1-ps4	high-mobility group box 1, pseudogene 4 [Source:RGD Symbol;Acc:1596834]
ENSRNOG00000029394	1162.56	-0.117623	0.0528839	-2.22418	0.0261361	0.0923816	ENSRNOG00000029394	Dusp8	dual specificity phosphatase 8 [Source:RGD Symbol;Acc:1306425]
ENSRNOG00000017884	48.7496	0.0753379	0.220783	0.341231	0.73293	0.856815	ENSRNOG00000017884	Dnajb6-ps10	DnaJ heat shock protein family (Hsp40) member B6, pseudogene 10 [Source:RGD Symbol;Acc:1583989]
ENSRNOG00000064417	414.987	-0.222138	0.0951734	-2.33403	0.019594	0.0742965	ENSRNOG00000064417
ENSRNOG00000021082	1337.51	-0.054627	0.0522077	-1.04634	0.295404	0.501769	ENSRNOG00000021082	Kdelr1	KDEL endoplasmic reticulum protein retention receptor 1 [Source:RGD Symbol;Acc:1306764]
ENSRNOG00000066269	66.7456	0.554905	0.224575	2.47091	0.0134768	0.0567114	ENSRNOG00000066269
ENSRNOG00000020197	188.125	-0.0330109	0.122727	-0.268978	0.787946	0.890324	ENSRNOG00000020197	Cd248	endosialin [Source:RGD Symbol;Acc:11367424]
ENSRNOG00000016687	79.6367	0.00752895	0.195545	0.0385023	0.969287	0.985583	ENSRNOG00000016687	Ssc5d	scavenger receptor cysteine rich family member with 5 domains [Source:RGD Symbol;Acc:1565772]
ENSRNOG00000059984	69.4293	-0.185258	0.184471	-1.00426	0.315253	0.522707	ENSRNOG00000059984	Dll1	delta like canonical Notch ligand 1 [Source:RGD Symbol;Acc:70949]
ENSRNOG00000020363	1440.11	0.0147312	0.0604693	0.243614	0.80753	0.903286	ENSRNOG00000020363	Med25	mediator complex subunit 25 [Source:RGD Symbol;Acc:1305137]
ENSRNOG00000020871	695.329	0.0843385	0.0834712	1.01039	0.312309	0.519466	ENSRNOG00000020871	Ltbp4	latent transforming growth factor beta binding protein 4 [Source:RGD Symbol;Acc:1307033]
ENSRNOG00000033843	22.817	0.145764	0.322378	0.452152	0.651159	0.804036	ENSRNOG00000033843	AABR07007121.1
ENSRNOG00000021151	432.824	0.186287	0.0814901	2.28601	0.0222535	0.0817853	ENSRNOG00000021151	Ppp1r14b	protein phosphatase 1, regulatory (inhibitor) subunit 14B [Source:RGD Symbol;Acc:628702]
ENSRNOG00000018310	73.819	0.733572	0.195057	3.76081	0.000169364	0.00176409	ENSRNOG00000018310	Eno4	enolase 4 [Source:RGD Symbol;Acc:1308333]
ENSRNOG00000030404	1328.15	0.0913071	0.0698723	1.30677	0.191291	0.37813	ENSRNOG00000030404	Arrb1	arrestin, beta 1 [Source:RGD Symbol;Acc:2156]
ENSRNOG00000067564	479.06	0.383574	0.0836593	4.58495	4.54098e-06	8.48016e-05	ENSRNOG00000067564
ENSRNOG00000014004	1410.28	0.0612496	0.0790882	0.774447	0.438666	0.638451	ENSRNOG00000014004	Ncoa7	nuclear receptor coactivator 7 [Source:RGD Symbol;Acc:1566426]
ENSRNOG00000047816	461.233	-0.0751418	0.0732007	-1.02652	0.304648	0.511587	ENSRNOG00000047816	Ccs	copper chaperone for superoxide dismutase [Source:RGD Symbol;Acc:620403]
ENSRNOG00000018433	284.841	0.0973373	0.105622	0.92156	0.356758	0.563975	ENSRNOG00000018433	Hps6	HPS6, biogenesis of lysosomal organelles complex 2 subunit 3 [Source:RGD Symbol;Acc:631341]
ENSRNOG00000020925	348.528	-0.0313207	0.087631	-0.357416	0.720781	0.849702	ENSRNOG00000020925	Ccdc86	coiled-coil domain containing 86 [Source:RGD Symbol;Acc:1359280]
ENSRNOG00000064594	178.051	0.645514	0.120748	5.34598	8.99289e-08	2.88578e-06	ENSRNOG00000064594
ENSRNOG00000070917	20.1215	0.298904	0.379525	0.787575	0.430945	0.632655	ENSRNOG00000070917	LOC102556098	zinc finger protein 729-like [Source:RGD Symbol;Acc:7732163]
ENSRNOG00000012140	252.943	0.0534561	0.106956	0.499793	0.617221	0.781334	ENSRNOG00000012140	Cep89	centrosomal protein 89 [Source:RGD Symbol;Acc:1311730]
ENSRNOG00000014828	587.938	0.01553	0.078969	0.196659	0.844094	0.921257	ENSRNOG00000014828	Avpi1	arginine vasopressin-induced 1 [Source:RGD Symbol;Acc:621721]
ENSRNOG00000020497	1588.83	0.0605377	0.0555238	1.0903	0.27558	0.48125	ENSRNOG00000020497	Plekha1	pleckstrin homology domain containing A1 [Source:RGD Symbol;Acc:1564153]
ENSRNOG00000025154	508.718	0.218156	0.0896894	2.43235	0.0150012	0.0613617	ENSRNOG00000025154	Snu13	NHP2 non-histone chromosome protein 2-like 1-like [Source:RGD Symbol;Acc:2323620]
ENSRNOG00000014448	684.12	-0.206018	0.0700921	-2.93924	0.00329018	0.0194512	ENSRNOG00000014448	Bmal1	basic helix-loop-helix ARNT like 1 [Source:RGD Symbol;Acc:62003]
ENSRNOG00000015753	8388.03	-0.228682	0.0444225	-5.14789	2.63426e-07	7.26743e-06	ENSRNOG00000015753	Epn1	Epsin 1 [Source:RGD Symbol;Acc:619772]
ENSRNOG00000067461	31.0718	0.852242	0.27909	3.05365	0.00226075	0.0144337	ENSRNOG00000067461	Rps12l2	ribosomal protein S12-like 2 [Source:RGD Symbol;Acc:2321899]
ENSRNOG00000028781	96.0269	0.0865861	0.187606	0.461532	0.644417	0.799038	ENSRNOG00000028781	Abcc6	ATP binding cassette subfamily C member 6 [Source:RGD Symbol;Acc:620268]
ENSRNOG00000064885	83.4122	0.486991	0.156925	3.10333	0.00191356	0.0125889	ENSRNOG00000064885
ENSRNOG00000065383	74.9689	-0.189174	0.174991	-1.08105	0.279674	0.485573	ENSRNOG00000065383
ENSRNOG00000069489	63.9675	-0.184519	0.183246	-1.00694	0.313962	0.521272	ENSRNOG00000069489
ENSRNOG00000019491	1482.85	-0.157797	0.056768	-2.77969	0.00544105	0.0288378	ENSRNOG00000019491	Stard10	StAR-related lipid transfer domain containing 10 [Source:RGD Symbol;Acc:1306548]
ENSRNOG00000064994	22.0178	-0.236176	0.32901	-0.717839	0.472856	0.667481	ENSRNOG00000064994
ENSRNOG00000031381	147.041	0.0801719	0.13603	0.589367	0.555615	0.733869	ENSRNOG00000031381	RGD1561333	similar to 60S ribosomal protein L8 [Source:RGD Symbol;Acc:1561333]
ENSRNOG00000021153	2323.66	-0.0348522	0.0499312	-0.698005	0.485174	0.677879	ENSRNOG00000021153	Fkbp2	FKBP prolyl isomerase 2 [Source:RGD Symbol;Acc:1560660]
ENSRNOG00000037137	753.064	0.208835	0.0599251	3.48494	0.000492251	0.00420457	ENSRNOG00000037137	Svip	small VCP interacting protein [Source:RGD Symbol;Acc:1565432]
ENSRNOG00000014380	364.759	0.0846863	0.0943552	0.897526	0.369438	0.576671	ENSRNOG00000014380	LOC102555672	zinc finger protein 850-like [Source:RGD Symbol;Acc:7701959]
ENSRNOG00000017150	476.119	-0.256097	0.0918655	-2.78774	0.00530773	0.0282841	ENSRNOG00000017150	Med10	mediator complex subunit 10 [Source:RGD Symbol;Acc:1310128]
ENSRNOG00000020517	36.5527	-0.276499	0.267246	-1.03462	0.300846	0.507639	ENSRNOG00000020517	Prrg2	proline rich and Gla domain 2 [Source:RGD Symbol;Acc:1305444]
ENSRNOG00000062805	194.638	0.0219083	0.112994	0.193889	0.846263	0.922733	ENSRNOG00000062805	Or14c39	olfactory receptor family 14 subfamily C member 39 [Source:RGD Symbol;Acc:1333763]
ENSRNOG00000015717	270.125	0.255606	0.0863596	2.95979	0.0030785	0.0184748	ENSRNOG00000015717	Ptpre	protein tyrosine phosphatase, receptor type, E [Source:RGD Symbol;Acc:620771]
ENSRNOG00000015914	2379.52	-0.0462166	0.0439232	-1.05221	0.292702	0.498591	ENSRNOG00000015914	U2af2	U2 small nuclear RNA auxiliary factor 2 [Source:RGD Symbol;Acc:1310690]
ENSRNOG00000019141	48.7402	0.16261	0.245118	0.663393	0.507079	0.695069	ENSRNOG00000019141	Ch25h	cholesterol 25-hydroxylase [Source:RGD Symbol;Acc:1310575]
ENSRNOG00000067799	147.631	0.322482	0.146584	2.19997	0.0278088	0.0965981	ENSRNOG00000067799	Selenow	selenoprotein W [Source:RGD Symbol;Acc:3661]
ENSRNOG00000019582	583.791	-0.0490033	0.0957989	-0.511522	0.608985	0.775989	ENSRNOG00000019582	Mthfd1l	methylenetetrahydrofolate dehydrogenase (NADP+ dependent) 1-like [Source:RGD Symbol;Acc:1307311]
ENSRNOG00000036711	21.7937	0.548275	0.31797	1.7243	0.084654	0.216526	ENSRNOG00000036711	Spn	sialophorin [Source:RGD Symbol;Acc:3750]
ENSRNOG00000013149	432.316	0.0222223	0.0842174	0.263868	0.791881	0.892917	ENSRNOG00000013149	Vps33b	VPS33B, late endosome and lysosome associated [Source:RGD Symbol;Acc:620644]
ENSRNOG00000018048	1474.39	-0.0814602	0.0493716	-1.64994	0.0989551	0.241345	ENSRNOG00000018048	Dctn5	dynactin subunit 5 [Source:RGD Symbol;Acc:1305654]
ENSRNOG00000010224	432.674	0.418155	0.0871805	4.79642	1.61525e-06	3.44548e-05	ENSRNOG00000010224	Rab30	RAB30, member RAS oncogene family [Source:RGD Symbol;Acc:1309507]
ENSRNOG00000029043	551.01	0.0836128	0.0736823	1.13477	0.25647	0.460227	ENSRNOG00000029043	Zfp790	zinc finger protein 790 [Source:RGD Symbol;Acc:1309815]
ENSRNOG00000017095	75.4309	0.0897467	0.171615	0.522955	0.601006	0.769893	ENSRNOG00000017095	Dlat-ps1	dihydrolipoamide S-acetyltransferase, pseudogene 1 [Source:RGD Symbol;Acc:1583609]
ENSRNOG00000018421	148.085	-0.0905759	0.118924	-0.76163	0.446281	0.645951	ENSRNOG00000018421	Aen	apoptosis enhancing nuclease [Source:RGD Symbol;Acc:1305051]
ENSRNOG00000019681	95.1383	0.1985	0.159306	1.24603	0.212753	0.406083	ENSRNOG00000019681	Pold1	DNA polymerase delta 1, catalytic subunit [Source:RGD Symbol;Acc:621839]
ENSRNOG00000020202	4043.41	-0.264058	0.0607315	-4.34797	1.37407e-05	0.000211241	ENSRNOG00000020202	Asrgl1	asparaginase and isoaspartyl peptidase 1 [Source:RGD Symbol;Acc:708526]
ENSRNOG00000017613	900.29	-0.0153831	0.0614352	-0.250395	0.802282	0.89985	ENSRNOG00000017613	Tent4a	terminal nucleotidyltransferase 4A [Source:RGD Symbol;Acc:1307356]
ENSRNOG00000055519	113.252	0.10471	0.1336	0.783761	0.433181	0.633942	ENSRNOG00000055519	Zfp790	zinc finger protein 790 [Source:RGD Symbol;Acc:1309815]
ENSRNOG00000011234	31.8798	0.651849	0.280598	2.32307	0.0201755	0.0757592	ENSRNOG00000011234	Taf5l-ps1	TATA-box binding protein associated factor 5 like, pseudogene 1 [Source:RGD Symbol;Acc:1582831]
ENSRNOG00000015997	534.456	-0.00130106	0.066956	-0.0194316	0.984497	0.993078	ENSRNOG00000015997	Ccdc106	coiled-coil domain containing 106 [Source:RGD Symbol;Acc:1566222]
ENSRNOG00000064983	38.9943	-0.0029763	0.24071	-0.0123646	0.990135	0.996986	ENSRNOG00000064983
ENSRNOG00000055020	90.3979	0.183516	0.174679	1.05059	0.293445	0.499511	ENSRNOG00000055020	LOC679731	hypothetical protein LOC679731 [Source:RGD Symbol;Acc:1584810]
ENSRNOG00000066969	106.27	-0.0273609	0.151291	-0.18085	0.856486	0.928165	ENSRNOG00000066969	Zfp790	zinc finger protein 420-like [Source:RGD Symbol;Acc:150344952]
ENSRNOG00000014251	1322.7	0.0686026	0.0509709	1.34592	0.178329	0.360559	ENSRNOG00000014251	Capn5	calpain 5 [Source:RGD Symbol;Acc:620084]
ENSRNOG00000066794	225.671	-0.323786	0.115056	-2.81417	0.0048904	0.0264341	ENSRNOG00000066794
ENSRNOG00000025539	1315.52	0.413606	0.0625256	6.61498	3.71597e-11	2.77873e-09	ENSRNOG00000025539	Vps13a	vacuolar protein sorting 13 homolog A [Source:RGD Symbol;Acc:1311340]
ENSRNOG00000012716	1051.19	0.0823095	0.0563893	1.45967	0.144382	0.311644	ENSRNOG00000012716	Chd2	chromodomain helicase DNA binding protein 2 [Source:RGD Symbol;Acc:1310056]
ENSRNOG00000063182	264.583	-0.0725281	0.0885514	-0.819051	0.412757	0.615762	ENSRNOG00000063182
ENSRNOG00000016011	172.341	0.0751413	0.113702	0.660864	0.5087	0.696258	ENSRNOG00000016011	Plekhg1	pleckstrin homology and RhoGEF domain containing G1 [Source:RGD Symbol;Acc:1583676]
ENSRNOG00000020014	914.712	0.128792	0.0693405	1.85739	0.0632557	0.176207	ENSRNOG00000020014	Myh14	myosin heavy chain 14 [Source:RGD Symbol;Acc:1306821]
ENSRNOG00000055082	2571.07	-0.108857	0.0518997	-2.09746	0.0359532	0.116955	ENSRNOG00000055082	Maz	MYC associated zinc finger protein [Source:RGD Symbol;Acc:1594632]
ENSRNOG00000019129	61.2163	-0.263673	0.196296	-1.34324	0.179195	0.361962	ENSRNOG00000019129	Fcgbp	Fc gamma binding protein [Source:RGD Symbol;Acc:2313189]
ENSRNOG00000017960	747.583	-0.000600448	0.0662048	-0.00906956	0.992764	0.997014	ENSRNOG00000017960	Deaf1	DEAF1 transcription factor [Source:RGD Symbol;Acc:620671]
ENSRNOG00000056062	99.2722	-0.187646	0.140263	-1.33782	0.180956	0.364511	ENSRNOG00000056062	LOC100912787	zinc finger protein 850-like [Source:RGD Symbol;Acc:6485475]
ENSRNOG00000052256	5007.34	-0.385729	0.0508979	-7.57849	3.49599e-14	4.83183e-12	ENSRNOG00000052256	Dact3	dishevelled-binding antagonist of beta-catenin 3 [Source:RGD Symbol;Acc:1563892]
ENSRNOG00000011931	4008.25	-0.0585604	0.0406527	-1.4405	0.149725	0.319991	ENSRNOG00000011931	Smarca2	SWI/SNF related, matrix associated, actin dependent regulator of chromatin, subfamily a, member 2 [Source:RGD Symbol;Acc:1302988]
ENSRNOG00000037556	391.166	0.0732774	0.0821542	0.89195	0.37242	0.579938	ENSRNOG00000037556	Zfp420	zinc finger protein 420 [Source:RGD Symbol;Acc:2323829]
ENSRNOG00000068138	1075.89	-0.258046	0.0790145	-3.26581	0.00109152	0.00802356	ENSRNOG00000068138	Aldh3b2	aldehyde dehydrogenase 3 family, member B2 [Source:RGD Symbol;Acc:1584166]
ENSRNOG00000070848	291.032	-0.0163762	0.0965715	-0.169576	0.865343	0.932675	ENSRNOG00000070848	Zfp27	zinc finger protein 27 [Source:RGD Symbol;Acc:2318958]
ENSRNOG00000013160	1190.24	-0.0793104	0.0994843	-0.797216	0.425326	0.628306	ENSRNOG00000013160	Sash1	SAM and SH3 domain containing 1 [Source:RGD Symbol;Acc:1566017]
ENSRNOG00000024077	29.4996	0.523985	0.325895	1.60784	0.107871	0.255501	ENSRNOG00000024077	Fbxo5	F-box protein 5 [Source:RGD Symbol;Acc:1309405]
ENSRNOG00000069496	67.5276	-0.000156185	0.210678	-0.000741344	0.999408	0.999545	ENSRNOG00000069496
ENSRNOG00000020456	426.472	-0.151396	0.0992318	-1.52568	0.12709	0.285997	ENSRNOG00000020456	Nucb2	nucleobindin 2 [Source:RGD Symbol;Acc:620888]
ENSRNOG00000019802	317.759	-0.0220143	0.108698	-0.202528	0.839504	0.920032	ENSRNOG00000019802	Zfp428	zinc finger protein 428 [Source:RGD Symbol;Acc:1564862]
ENSRNOG00000065781	101.569	2.10432	0.793007	2.6536	0.00796389	0.0382437	ENSRNOG00000065781
ENSRNOG00000062668	22.4655	-0.246253	0.323035	-0.762311	0.445874	0.645617	ENSRNOG00000062668
ENSRNOG00000012806	1206.66	0.0607186	0.0558622	1.08694	0.277065	0.482868	ENSRNOG00000012806	Rbbp6	RB binding protein 6, ubiquitin ligase [Source:RGD Symbol;Acc:1311964]
ENSRNOG00000019497	1594.8	-0.0622096	0.0484985	-1.28271	0.199593	0.389098	ENSRNOG00000019497	Mrpl17	mitochondrial ribosomal protein L17 [Source:RGD Symbol;Acc:70943]
ENSRNOG00000045545	42.9784	-0.062562	0.223897	-0.279423	0.77992	0.885887	ENSRNOG00000045545	Eid2b	EP300 interacting inhibitor of differentiation 2B [Source:RGD Symbol;Acc:9381183]
ENSRNOG00000064214	1311.61	0.485274	0.0555339	8.73833	2.36579e-18	7.09593e-16	ENSRNOG00000064214
ENSRNOG00000037331	178.915	-0.0247442	0.161047	-0.153646	0.877889	0.939636	ENSRNOG00000037331	Cd33	CD33 molecule [Source:RGD Symbol;Acc:1596020]
ENSRNOG00000062784	38.7722	-0.310368	0.260528	-1.1913	0.233534	0.432709	ENSRNOG00000062784
ENSRNOG00000020774	299.482	0.272025	0.11103	2.45002	0.0142848	0.0592226	ENSRNOG00000020774	Zfp420	zinc finger protein 383-like [Source:RGD Symbol;Acc:9160828]
ENSRNOG00000037897	4660.64	-0.161858	0.0574873	-2.81554	0.00486946	0.0263597	ENSRNOG00000037897	Rps19	ribosomal protein S19 [Source:RGD Symbol;Acc:68440]
ENSRNOG00000016831	775.965	-0.543824	0.0827368	-6.57294	4.93318e-11	3.58926e-09	ENSRNOG00000016831	Serpinh1	serpin family H member 1 [Source:RGD Symbol;Acc:69302]
ENSRNOG00000024280	23.4435	0.391949	0.339963	1.15291	0.248946	0.451308	ENSRNOG00000024280	Ccdc170	coiled-coil domain containing 170 [Source:RGD Symbol;Acc:1310945]
ENSRNOG00000055683	32.1706	0.229573	0.259063	0.88617	0.375526	0.583168	ENSRNOG00000055683	Cct7-ps1	chaperonin containing Tcp1, subunit 7 (eta), pseudogene 1 [Source:RGD Symbol;Acc:1562884]
ENSRNOG00000056228	362.813	0.203377	0.0858281	2.36958	0.0178082	0.0694685	ENSRNOG00000056228	Atp10a	ATPase phospholipid transporting 10A (putative) [Source:RGD Symbol;Acc:1306150]
ENSRNOG00000028743	976.784	-0.149513	0.0600792	-2.48859	0.012825	0.0547614	ENSRNOG00000028743	Gal3st3	galactose-3-O-sulfotransferase 3 [Source:RGD Symbol;Acc:1564991]
ENSRNOG00000067556	25.1236	-0.22269	0.301293	-0.739114	0.459838	0.65748	ENSRNOG00000067556
ENSRNOG00000028273	869.271	-0.0587705	0.0740038	-0.794154	0.427106	0.630242	ENSRNOG00000028273	Tmem150b	transmembrane protein 150B [Source:RGD Symbol;Acc:1306181]
ENSRNOG00000023233	219.89	-0.1852	0.0984419	-1.88131	0.05993	0.169709	ENSRNOG00000023233	Zfp658	zinc finger protein 658 [Source:RGD Symbol;Acc:7541917]
ENSRNOG00000034075	3636.25	-0.21012	0.0633589	-3.31634	0.000912044	0.00692613	ENSRNOG00000034075	Ube2ql1	ubiquitin-conjugating enzyme E2Q family-like 1 [Source:RGD Symbol;Acc:1598121]
ENSRNOG00000014341	1612.35	-0.0343916	0.0712131	-0.482939	0.629139	0.789621	ENSRNOG00000014341	Btbd10	BTB domain containing 10 [Source:RGD Symbol;Acc:1306301]
ENSRNOG00000069950	86.7104	-0.635568	0.588081	-1.08075	0.279809	0.48574	ENSRNOG00000069950
ENSRNOG00000020543	554.068	-0.0677059	0.0819675	-0.826009	0.408799	0.612573	ENSRNOG00000020543	Nosip	nitric oxide synthase interacting protein [Source:RGD Symbol;Acc:1309992]
ENSRNOG00000020298	145.561	0.0953517	0.155028	0.615062	0.538514	0.720027	ENSRNOG00000020298	Bag3	BAG cochaperone 3 [Source:RGD Symbol;Acc:1307794]
ENSRNOG00000018255	3695.77	-0.118589	0.0415773	-2.85224	0.00434119	0.0241122	ENSRNOG00000018255	Clptm1	CLPTM1 regulator of GABA type A receptor forward trafficking [Source:RGD Symbol;Acc:1310959]
ENSRNOG00000066399	518.734	-0.220582	0.0797238	-2.76683	0.0056605	0.0297009	ENSRNOG00000066399
ENSRNOG00000021000	127.934	-0.168431	0.139041	-1.21137	0.225752	0.422713	ENSRNOG00000021000	Naaladl1	N-acetylated alpha-linked acidic dipeptidase-like 1 [Source:RGD Symbol;Acc:620987]
ENSRNOG00000062327	553.841	-0.106663	0.0783392	-1.36156	0.173338	0.353777	ENSRNOG00000062327
ENSRNOG00000070318	41.1454	0.15499	0.251938	0.61519	0.538429	0.71998	ENSRNOG00000070318
ENSRNOG00000033729	293.939	0.382219	0.0932901	4.0971	4.18365e-05	0.000541736	ENSRNOG00000033729	LOC102556967	zinc finger protein 484-like [Source:RGD Symbol;Acc:7510716]
ENSRNOG00000020716	1359.27	-0.177969	0.0669026	-2.66012	0.00781138	0.03769	ENSRNOG00000020716	Axl	Axl receptor tyrosine kinase [Source:RGD Symbol;Acc:620028]
ENSRNOG00000011488	596.558	0.0391878	0.0683726	0.573151	0.566542	0.743103	ENSRNOG00000011488	Sergef	secretion regulating guanine nucleotide exchange factor [Source:RGD Symbol;Acc:1563497]
ENSRNOG00000015441	199.21	0.0802633	0.143864	0.557911	0.576905	0.751132	ENSRNOG00000015441	Il4r	interleukin 4 receptor [Source:RGD Symbol;Acc:2899]
ENSRNOG00000047057	351.269	0.0235523	0.0940555	0.250408	0.802272	0.89985	ENSRNOG00000047057	Gpr26	G protein-coupled receptor 26 [Source:RGD Symbol;Acc:619843]
ENSRNOG00000020412	3786.75	-0.168358	0.0372489	-4.51982	6.18926e-06	0.000109859	ENSRNOG00000020412	Sf3b2	splicing factor 3b, subunit 2 [Source:RGD Symbol;Acc:1307159]
ENSRNOG00000065957	29.2479	-0.445699	0.29587	-1.5064	0.131963	0.293678	ENSRNOG00000065957
ENSRNOG00000016923	2045.49	-0.052376	0.0478522	-1.09454	0.273719	0.479276	ENSRNOG00000016923	Clptm1l	CLPTM1-like [Source:RGD Symbol;Acc:1307896]
ENSRNOG00000010938	703.789	-0.121376	0.0739574	-1.64117	0.100763	0.244174	ENSRNOG00000010938	Slc7a10	solute carrier family 7 member 10 [Source:RGD Symbol;Acc:621672]
ENSRNOG00000065260	403.736	-0.0100862	0.082099	-0.122855	0.902222	0.95201	ENSRNOG00000065260
ENSRNOG00000011029	517.665	-0.166264	0.0751974	-2.21103	0.0270337	0.0946661	ENSRNOG00000011029	Sec11a	SEC11 homolog A, signal peptidase complex subunit [Source:RGD Symbol;Acc:69360]
ENSRNOG00000015239	330.922	0.0219512	0.110575	0.198518	0.84264	0.920832	ENSRNOG00000015239	Ginm1	glycosylated integral membrane protein 1 [Source:RGD Symbol;Acc:1309759]
ENSRNOG00000069539	227.867	-0.086566	0.104628	-0.827373	0.408026	0.611689	ENSRNOG00000069539	Zfp74	zinc finger protein 74 [Source:RGD Symbol;Acc:1563223]
ENSRNOG00000018426	152.468	-0.259976	0.141268	-1.8403	0.0657249	0.181333	ENSRNOG00000018426	Apoc1	apolipoprotein C1 [Source:RGD Symbol;Acc:2134]
ENSRNOG00000020110	1472.32	-0.0796714	0.0525992	-1.51469	0.129851	0.290488	ENSRNOG00000020110	B4gat1	beta-1,4-glucuronyltransferase 1 [Source:RGD Symbol;Acc:1309541]
ENSRNOG00000012084	1295.85	-0.153038	0.0532	-2.87665	0.00401923	0.0226846	ENSRNOG00000012084	Xpnpep1	X-prolyl aminopeptidase 1 [Source:RGD Symbol;Acc:621274]
ENSRNOG00000046652	142.285	0.233508	0.131635	1.77391	0.0760785	0.200741	ENSRNOG00000046652	Zfp790	zinc finger protein 30 homolog [Source:RGD Symbol;Acc:11363847]
ENSRNOG00000013770	740.979	0.00457051	0.0797243	0.057329	0.954283	0.978071	ENSRNOG00000013770	Folh1	folate hydrolase 1 [Source:RGD Symbol;Acc:70963]
ENSRNOG00000024961	537.915	0.225016	0.0706821	3.18349	0.00145514	0.0100878	ENSRNOG00000024961	Usp35	ubiquitin specific peptidase 35 [Source:RGD Symbol;Acc:1565984]
ENSRNOG00000017673	15140.6	-0.178404	0.0393301	-4.53606	5.73147e-06	0.000103103	ENSRNOG00000017673	Brsk1	BR serine/threonine kinase 1 [Source:RGD Symbol;Acc:1563268]
ENSRNOG00000032150	5729.44	-0.185724	0.0325762	-5.70122	1.18951e-08	4.88329e-07	ENSRNOG00000032150	Adcy2	adenylate cyclase 2 [Source:RGD Symbol;Acc:619965]
ENSRNOG00000018356	1890.07	-0.0687816	0.0569587	-1.20757	0.227213	0.424422	ENSRNOG00000018356	Trim3	tripartite motif-containing 3 [Source:RGD Symbol;Acc:70074]
ENSRNOG00000023753	1809.24	0.180818	0.0491888	3.67599	0.000236928	0.0023362	ENSRNOG00000023753	Afdn	afadin, adherens junction formation factor [Source:RGD Symbol;Acc:708561]
ENSRNOG00000030932	472.479	-0.00352381	0.0725214	-0.0485899	0.961246	0.982231	ENSRNOG00000030932	Zfp14	ZFP14 zinc finger protein [Source:RGD Symbol;Acc:1560188]
ENSRNOG00000018761	3656.22	-0.378784	0.0696198	-5.44075	5.30559e-08	1.79669e-06	ENSRNOG00000018761	Eif3c	eukaryotic translation initiation factor 3, subunit C [Source:RGD Symbol;Acc:1308871]
ENSRNOG00000062876	20.9096	0.594913	0.318886	1.8656	0.0620978	0.173842	ENSRNOG00000062876	LOC108349685	uncharacterized LOC108349685 [Source:RGD Symbol;Acc:11462351]
ENSRNOG00000030160	23.4402	-0.385892	0.309272	-1.24774	0.212126	0.405306	ENSRNOG00000030160	Zfp819	zinc finger protein 819 [Source:RGD Symbol;Acc:1309564]
ENSRNOG00000069633	133.146	0.35164	0.129352	2.71848	0.00655822	0.0330656	ENSRNOG00000069633	Itpripl2	ITPRIP like 2 [Source:RGD Symbol;Acc:1564255]
ENSRNOG00000032946	154.571	0.551623	0.145344	3.7953	0.000147467	0.00156825	ENSRNOG00000032946	Pdzd7	PDZ domain containing 7 [Source:RGD Symbol;Acc:1309882]
ENSRNOG00000020743	54.1987	0.111054	0.215007	0.516512	0.605497	0.773556	ENSRNOG00000020743	Cyp2s1	cytochrome P450, family 2, subfamily s, polypeptide 1 [Source:RGD Symbol;Acc:1306078]
ENSRNOG00000012362	3302.82	-0.238247	0.0538562	-4.42375	9.70007e-06	0.000159465	ENSRNOG00000012362	Cacng3	calcium voltage-gated channel auxiliary subunit gamma 3 [Source:RGD Symbol;Acc:628803]
ENSRNOG00000014303	5014.5	-0.0231258	0.0443836	-0.521043	0.602337	0.770899	ENSRNOG00000014303	Lrp11	LDL receptor related protein 11 [Source:RGD Symbol;Acc:1308602]
ENSRNOG00000018454	40718.3	-0.146659	0.0649462	-2.25816	0.0239358	0.086391	ENSRNOG00000018454	Apoe	apolipoprotein E [Source:RGD Symbol;Acc:2138]
ENSRNOG00000052023	21.5988	0.0935059	0.318575	0.293513	0.76913	0.879376	ENSRNOG00000052023	LOC102547241	zinc finger protein 82 [Source:RGD Symbol;Acc:6499485]
ENSRNOG00000020531	472.846	-0.0938342	0.0832349	-1.12734	0.259598	0.463575	ENSRNOG00000020531	Fen1	flap structure-specific endonuclease 1 [Source:RGD Symbol;Acc:621821]
ENSRNOG00000019544	190.617	-0.0835978	0.130667	-0.639779	0.522317	0.707892	ENSRNOG00000019544	Zbtb2	zinc finger and BTB domain containing 2 [Source:RGD Symbol;Acc:1306621]
ENSRNOG00000020477	44.9718	-0.00087054	0.216895	-0.00401364	0.996798	0.998404	ENSRNOG00000020477	LOC100911093	CCA tRNA nucleotidyltransferase 1, mitochondrial-like [Source:RGD Symbol;Acc:6494996]
ENSRNOG00000023549	167.552	0.151286	0.117712	1.28522	0.198715	0.388057	ENSRNOG00000023549	Samd5	sterile alpha motif domain containing 5 [Source:RGD Symbol;Acc:1311012]
ENSRNOG00000021096	454.543	-0.0643827	0.0810889	-0.793976	0.427209	0.630264	ENSRNOG00000021096	Tmem143	transmembrane protein 143 [Source:RGD Symbol;Acc:1305013]
ENSRNOG00000022796	229.149	0.0392983	0.104982	0.374333	0.708156	0.842257	ENSRNOG00000022796	Fgfbp3	fibroblast growth factor binding protein 3 [Source:RGD Symbol;Acc:1560326]
ENSRNOG00000029784	11076.7	-0.132879	0.0449862	-2.95378	0.0031391	0.0187695	ENSRNOG00000029784	Pak1	p21 (RAC1) activated kinase 1 [Source:RGD Symbol;Acc:3250]
ENSRNOG00000018885	790.919	0.145024	0.0656783	2.2081	0.0272373	0.0953172	ENSRNOG00000018885	Zfp780b	zinc finger protein 780B [Source:RGD Symbol;Acc:1592570]
ENSRNOG00000063852	864.977	0.041935	0.0697116	0.60155	0.547473	0.727093	ENSRNOG00000063852	Tmem80	transmembrane protein 80 [Source:RGD Symbol;Acc:1308399]
ENSRNOG00000048138	130.304	0.181721	0.138812	1.30911	0.190496	0.377109	ENSRNOG00000048138	Zfp566	zinc finger protein 566 [Source:RGD Symbol;Acc:1563239]
ENSRNOG00000019306	831.266	-0.0780826	0.096711	-0.807381	0.419447	0.621746	ENSRNOG00000019306	Syt12	synaptotagmin 12 [Source:RGD Symbol;Acc:621876]
ENSRNOG00000018440	1751.15	-0.00864887	0.0448251	-0.192947	0.847	0.923195	ENSRNOG00000018440	Arfip2	ADP-ribosylation factor interacting protein 2 [Source:RGD Symbol;Acc:1303204]
ENSRNOG00000029082	324.047	-0.0342953	0.1006	-0.340908	0.733173	0.856962	ENSRNOG00000029082	RGD1566189	similar to ferritin light chain [Source:RGD Symbol;Acc:1566189]
ENSRNOG00000021104	48.6037	-0.222199	0.259364	-0.856707	0.391607	0.597224	ENSRNOG00000021104	Emp3	epithelial membrane protein 3 [Source:RGD Symbol;Acc:621094]
ENSRNOG00000011451	1351.79	-0.0161667	0.0643926	-0.251065	0.801764	0.899718	ENSRNOG00000011451	Lrp3	LDL receptor related protein 3 [Source:RGD Symbol;Acc:619729]
ENSRNOG00000017254	1150.94	-0.104067	0.0547733	-1.89996	0.0574384	0.164877	ENSRNOG00000017254	Nsun2	NOP2/Sun RNA methyltransferase 2 [Source:RGD Symbol;Acc:1311954]
ENSRNOG00000020117	1034.37	0.0257635	0.058091	0.443502	0.657403	0.807914	ENSRNOG00000020117	Brms1	BRMS1, transcriptional repressor and anoikis regulator [Source:RGD Symbol;Acc:1311057]
ENSRNOG00000050995	171.309	0.142367	0.115234	1.23546	0.216661	0.411032	ENSRNOG00000050995	Zfp780b	zinc finger protein 780B [Source:RGD Symbol;Acc:1592570]
ENSRNOG00000015503	1008.29	-0.14666	0.0641481	-2.28628	0.022238	0.0817853	ENSRNOG00000015503	Otud7a	OTU deubiquitinase 7A [Source:RGD Symbol;Acc:1563721]
ENSRNOG00000021003	172.81	-0.180438	0.118738	-1.51964	0.128602	0.288382	ENSRNOG00000021003	Sac3d1	SAC3 domain containing 1 [Source:RGD Symbol;Acc:1308049]
ENSRNOG00000020274	124.501	-0.097972	0.128441	-0.762776	0.445597	0.645495	ENSRNOG00000020274	Taf5	TATA-box binding protein associated factor 5 [Source:RGD Symbol;Acc:1311332]
ENSRNOG00000058039	347.072	-0.127147	0.115561	-1.10026	0.271218	0.476399	ENSRNOG00000058039	Acta2	actin alpha 2, smooth muscle [Source:RGD Symbol;Acc:621676]
ENSRNOG00000018556	1071.44	0.0912014	0.0694552	1.3131	0.18915	0.375378	ENSRNOG00000018556	Tomm40	translocase of outer mitochondrial membrane 40 [Source:RGD Symbol;Acc:1303022]
ENSRNOG00000065206	26.8167	-0.346853	0.297837	-1.16457	0.244191	0.44599	ENSRNOG00000065206
ENSRNOG00000028137	94.1482	0.31241	0.212751	1.46843	0.141988	0.308459	ENSRNOG00000028137	Mki67	marker of proliferation Ki-67 [Source:RGD Symbol;Acc:1305476]
ENSRNOG00000051102	89.8923	-0.278887	0.171228	-1.62875	0.103365	0.248067	ENSRNOG00000051102	AABR07004269.3
ENSRNOG00000020296	2562.22	-0.0326171	0.0596428	-0.546874	0.584465	0.756947	ENSRNOG00000020296	Atp5mk	ATP synthase membrane subunit K [Source:RGD Symbol;Acc:631426]
ENSRNOG00000022640	22.2967	-0.27543	0.32427	-0.849384	0.395668	0.60055	ENSRNOG00000022640	Siglec8	sialic acid binding Ig-like lectin 8 [Source:RGD Symbol;Acc:1563073]
ENSRNOG00000029805	250.331	0.0771359	0.107228	0.719361	0.471919	0.666646	ENSRNOG00000029805	Zfp780b	zinc finger protein 780B [Source:RGD Symbol;Acc:1592570]
ENSRNOG00000017601	426.646	0.0601451	0.0820858	0.73271	0.463736	0.659962	ENSRNOG00000017601	Srd5a1	steroid 5 alpha-reductase 1 [Source:RGD Symbol;Acc:3757]
ENSRNOG00000016090	680.817	0.152054	0.0748187	2.0323	0.042123	0.131552	ENSRNOG00000016090	Mtmr10	myotubularin related protein 10 [Source:RGD Symbol;Acc:1305958]
ENSRNOG00000045560	27.1706	1.80682	0.342294	5.27855	1.30208e-07	3.93035e-06	ENSRNOG00000045560	Gvin1	GTPase, very large interferon inducible 1 [Source:RGD Symbol;Acc:1598220]
ENSRNOG00000020651	1249.42	-0.0703345	0.0571682	-1.23031	0.218582	0.413344	ENSRNOG00000020651	Cars1	cysteinyl-tRNA synthetase 1 [Source:RGD Symbol;Acc:1310747]
ENSRNOG00000065330	750.984	-0.121311	0.0830933	-1.45994	0.144308	0.311623	ENSRNOG00000065330	Mrgpre	MAS related GPR family member E [Source:RGD Symbol;Acc:738045]
ENSRNOG00000016679	213.97	0.287895	0.118382	2.43193	0.0150188	0.0614164	ENSRNOG00000016679	Tmc7	transmembrane channel-like 7 [Source:RGD Symbol;Acc:1564267]
ENSRNOG00000018350	871.17	0.0810238	0.0676459	1.19776	0.231009	0.429275	ENSRNOG00000018350	Shtn1	shootin 1 [Source:RGD Symbol;Acc:1311558]
ENSRNOG00000028992	95.0681	-0.145224	0.194869	-0.745236	0.456129	0.654533	ENSRNOG00000028992	Acan	aggrecan [Source:RGD Symbol;Acc:68358]
ENSRNOG00000019838	62.992	-0.425524	0.204064	-2.08525	0.0370465	0.119507	ENSRNOG00000019838	Gmfg	glia maturation factor, gamma [Source:RGD Symbol;Acc:620506]
ENSRNOG00000019549	1076.19	0.0900539	0.0677257	1.32969	0.183622	0.368048	ENSRNOG00000019549	Akap12	A-kinase anchoring protein 12 [Source:RGD Symbol;Acc:70988]
ENSRNOG00000011151	870.506	0.0765902	0.098041	0.781206	0.434681	0.635041	ENSRNOG00000011151	Tenm4	teneurin transmembrane protein 4 [Source:RGD Symbol;Acc:1304658]
ENSRNOG00000022189	275.033	-0.214928	0.101195	-2.12389	0.0336796	0.111334	ENSRNOG00000022189	Htatip2	HIV-1 Tat interactive protein 2 [Source:RGD Symbol;Acc:1309941]
ENSRNOG00000020762	1532.82	-0.100077	0.0547952	-1.82639	0.067792	0.18509	ENSRNOG00000020762	Zfp260	zinc finger protein 260 [Source:RGD Symbol;Acc:621205]
ENSRNOG00000023318	70.398	-0.0314667	0.189156	-0.166353	0.867879	0.933921	ENSRNOG00000023318	Tigd3	tigger transposable element derived 3 [Source:RGD Symbol;Acc:1305393]
ENSRNOG00000066701	92.4289	-0.23027	0.168778	-1.36433	0.172463	0.352299	ENSRNOG00000066701	LOC691427	similar to 6.8 kDa mitochondrial proteolipid [Source:RGD Symbol;Acc:1583946]
ENSRNOG00000053075	1509.2	0.121086	0.0621279	1.94898	0.0512976	0.152204	ENSRNOG00000053075	B4galnt4	beta-1,4-N-acetyl-galactosaminyl transferase 4 [Source:RGD Symbol;Acc:1310052]
ENSRNOG00000012874	1390.38	-0.139762	0.0548307	-2.54897	0.0108041	0.0482054	ENSRNOG00000012874	Rgma	repulsive guidance molecule BMP co-receptor a [Source:RGD Symbol;Acc:1311983]
ENSRNOG00000065214	282.182	-0.143768	0.140752	-1.02143	0.30705	0.513684	ENSRNOG00000065214	LOC120097335	high mobility group nucleosome-binding domain-containing protein 5-like [Source:RGD Symbol;Acc:41304028]
ENSRNOG00000011895	166.78	-0.0641949	0.120552	-0.532508	0.594374	0.765132	ENSRNOG00000011895	Saal1	serum amyloid A-like 1 [Source:RGD Symbol;Acc:1587443]
ENSRNOG00000017659	780.449	-0.239224	0.107573	-2.22382	0.0261606	0.0924236	ENSRNOG00000017659	Hs3st2	heparan sulfate-glucosamine 3-sulfotransferase 2 [Source:RGD Symbol;Acc:727787]
ENSRNOG00000020777	554.331	-0.0175468	0.0764452	-0.229534	0.818454	0.908247	ENSRNOG00000020777	Zfp382	zinc finger protein 382 [Source:RGD Symbol;Acc:708385]
ENSRNOG00000016266	320.59	-0.147527	0.097377	-1.51501	0.12977	0.290426	ENSRNOG00000016266	Mphosph10	M-phase phosphoprotein 10 [Source:RGD Symbol;Acc:1307633]
ENSRNOG00000017839	440.568	-0.0350526	0.0776177	-0.451605	0.651554	0.804088	ENSRNOG00000017839	Ercc1	ERCC excision repair 1, endonuclease non-catalytic subunit [Source:RGD Symbol;Acc:1306992]
ENSRNOG00000017918	361.686	0.0455849	0.0970844	0.469539	0.638685	0.795487	ENSRNOG00000017918	Iglon5	IgLON family member 5 [Source:RGD Symbol;Acc:1305344]
ENSRNOG00000016381	71.2769	-0.230489	0.185441	-1.24293	0.213895	0.407674	ENSRNOG00000016381	Ust	uronyl-2-sulfotransferase [Source:RGD Symbol;Acc:1304743]
ENSRNOG00000020736	177.93	0.147445	0.117373	1.25621	0.209041	0.401605	ENSRNOG00000020736	Nadsyn1	NAD synthetase 1 [Source:RGD Symbol;Acc:727801]
ENSRNOG00000023985	216.613	0.0277147	0.102911	0.269308	0.787692	0.890201	ENSRNOG00000023985	Fan1	FANCD2 and FANCI associated nuclease 1 [Source:RGD Symbol;Acc:1566323]
ENSRNOG00000019376	379.464	0.315019	0.0900379	3.49874	0.000467467	0.00402718	ENSRNOG00000019376	Zfp329	zinc finger protein 329 [Source:RGD Symbol;Acc:1565029]
ENSRNOG00000017456	476.242	0.0689713	0.107283	0.64289	0.520295	0.70653	ENSRNOG00000017456	Vstm2b	V-set and transmembrane domain containing 2B [Source:RGD Symbol;Acc:1306235]
ENSRNOG00000008815	297.536	-0.00268211	0.0915046	-0.0293112	0.976616	0.98968	ENSRNOG00000008815	Fbxo46	F-box protein 46 [Source:RGD Symbol;Acc:1308393]
ENSRNOG00000016722	2232.79	-0.0887227	0.0512747	-1.73034	0.0835693	0.214626	ENSRNOG00000016722	Xpo6	exportin 6 [Source:RGD Symbol;Acc:1311491]
ENSRNOG00000048397	1019.22	-0.0640353	0.0513512	-1.24701	0.212395	0.405662	ENSRNOG00000048397	Sephs2	selenophosphate synthetase 2 [Source:RGD Symbol;Acc:1308827]
ENSRNOG00000017728	536.109	-0.0140452	0.101859	-0.137889	0.890328	0.945391	ENSRNOG00000017728	Edrf1	erythroid differentiation regulatory factor 1 [Source:RGD Symbol;Acc:1306820]
ENSRNOG00000067450	950.807	-0.104724	0.0574644	-1.82241	0.0683924	0.186245	ENSRNOG00000067450	Zfp146	zinc finger protein 146 [Source:RGD Symbol;Acc:7630088]
ENSRNOG00000015552	830.376	0.0541442	0.0605562	0.894115	0.37126	0.578807	ENSRNOG00000015552	Ppil4	peptidylprolyl isomerase like 4 [Source:RGD Symbol;Acc:1311051]
ENSRNOG00000016919	1574.03	-0.112261	0.0509159	-2.20483	0.0274658	0.0957451	ENSRNOG00000016919	Scaf8	SR-related CTD-associated factor 8 [Source:RGD Symbol;Acc:708362]
ENSRNOG00000019106	4078.4	-0.333316	0.0588775	-5.66117	1.50342e-08	5.95572e-07	ENSRNOG00000019106	Rps17	40S ribosomal protein S17-like [Source:RGD Symbol;Acc:2318277]
ENSRNOG00000010959	215.258	-0.0353565	0.109077	-0.324144	0.745829	0.864375	ENSRNOG00000010959	Klhl25	kelch-like family member 25 [Source:RGD Symbol;Acc:1310815]
ENSRNOG00000021474	62.7789	-0.0342565	0.198084	-0.17294	0.862699	0.930985	ENSRNOG00000021474	Siglec5	sialic acid binding Ig-like lectin 5 [Source:RGD Symbol;Acc:1305432]
ENSRNOG00000028274	1230.7	0.109616	0.0723174	1.51577	0.129578	0.290085	ENSRNOG00000028274	Myrf	myelin regulatory factor [Source:RGD Symbol;Acc:1306622]
ENSRNOG00000024410	622.952	-0.0019876	0.0686539	-0.028951	0.976904	0.989835	ENSRNOG00000024410	Blvrb	biliverdin reductase B [Source:RGD Symbol;Acc:1306080]
ENSRNOG00000010017	674.687	0.274541	0.0722481	3.79998	0.00014471	0.00154789	ENSRNOG00000010017	Wee1	WEE1 G2 checkpoint kinase [Source:RGD Symbol;Acc:1307895]
ENSRNOG00000050015	47.3838	-0.00572374	0.255876	-0.0223692	0.982153	0.992132	ENSRNOG00000050015	Cox7a1	cytochrome c oxidase subunit 7A1 [Source:RGD Symbol;Acc:6496527]
ENSRNOG00000047692	36.0645	0.130892	0.308607	0.42414	0.671464	0.818148	ENSRNOG00000047692	Hells	helicase, lymphoid specific [Source:RGD Symbol;Acc:1309820]
ENSRNOG00000065271	50.7131	0.226379	0.229428	0.986714	0.323783	0.53181	ENSRNOG00000065271	Fam174b	family with sequence similarity 174, member B [Source:RGD Symbol;Acc:1596692]
ENSRNOG00000020304	877.232	0.0946794	0.0631444	1.49941	0.133767	0.29608	ENSRNOG00000020304	Pdcd11	programmed cell death 11 [Source:RGD Symbol;Acc:1304933]
ENSRNOG00000017418	6058.43	-0.0684797	0.0540717	-1.26646	0.205348	0.397001	ENSRNOG00000017418	Rps3	ribosomal protein S3 [Source:RGD Symbol;Acc:619888]
ENSRNOG00000012369	141.219	0.0957645	0.136031	0.703993	0.481437	0.674928	ENSRNOG00000012369	Fam174b	family with sequence similarity 174, member B [Source:RGD Symbol;Acc:1596692]
ENSRNOG00000014450	753.698	0.198567	0.0610069	3.25483	0.00113459	0.00828524	ENSRNOG00000014450	Shprh	SNF2 histone linker PHD RING helicase [Source:RGD Symbol;Acc:1310342]
ENSRNOG00000067065	2603.82	-0.100231	0.0529674	-1.89231	0.0584499	0.166915	ENSRNOG00000067065	Capns1	calpain, small subunit 1 [Source:RGD Symbol;Acc:2270]
ENSRNOG00000037298	629.452	0.0709199	0.100745	0.703953	0.481462	0.674928	ENSRNOG00000037298	C1h19orf81	simlar to human chromosome 19 open reading frame 81 [Source:RGD Symbol;Acc:1309036]
ENSRNOG00000016825	145.564	-0.187409	0.128467	-1.45881	0.144616	0.311967	ENSRNOG00000016825	Polr1g	RNA polymerase I subunit G [Source:RGD Symbol;Acc:1591707]
ENSRNOG00000024737	1222.83	0.272526	0.0659301	4.13357	3.57179e-05	0.000473778	ENSRNOG00000024737	Tnrc6a	trinucleotide repeat containing adaptor 6A [Source:RGD Symbol;Acc:1307268]
ENSRNOG00000013624	51.278	0.18886	0.229075	0.824448	0.409685	0.613212	ENSRNOG00000013624	Uevld	UEV and lactate/malate dehyrogenase domains [Source:RGD Symbol;Acc:1587416]
ENSRNOG00000070456	33.7357	-1.0633	0.310657	-3.42276	0.000619893	0.00508119	ENSRNOG00000070456	LOC108348146	vomeronasal type-1 receptor 3-like [Source:RGD Symbol;Acc:11394442]
ENSRNOG00000020325	246.16	-0.202177	0.104077	-1.94257	0.0520685	0.153694	ENSRNOG00000020325	Calhm2	calcium homeostasis modulator family member 2 [Source:RGD Symbol;Acc:1308276]
ENSRNOG00000015413	266.344	-0.0298246	0.105049	-0.283911	0.776478	0.883616	ENSRNOG00000015413	Qpctl	glutaminyl-peptide cyclotransferase-like [Source:RGD Symbol;Acc:1308128]
ENSRNOG00000016897	1057.48	-0.247337	0.0856168	-2.88888	0.00386616	0.0220322	ENSRNOG00000016897	Rlbp1	retinaldehyde binding protein 1 [Source:RGD Symbol;Acc:1309649]
ENSRNOG00000037690	40.9053	-0.232125	0.254227	-0.913064	0.361209	0.568382	ENSRNOG00000037690	Sertad3	SERTA domain containing 3 [Source:RGD Symbol;Acc:1564271]
ENSRNOG00000014330	6938.35	0.0923018	0.0477175	1.93434	0.0530716	0.155687	ENSRNOG00000014330	Pcmt1	protein-L-isoaspartate (D-aspartate) O-methyltransferase 1 [Source:RGD Symbol;Acc:3268]
ENSRNOG00000013223	447.299	0.379617	0.098063	3.87115	0.000108321	0.00122745	ENSRNOG00000013223	Fah	fumarylacetoacetate hydrolase [Source:RGD Symbol;Acc:61932]
ENSRNOG00000046112	368.747	0.149552	0.100349	1.49032	0.136141	0.29962	ENSRNOG00000046112	Dedd2	death effector domain containing 2 [Source:RGD Symbol;Acc:1588968]
ENSRNOG00000027264	2753.09	-0.108343	0.0687539	-1.57581	0.11507	0.267065	ENSRNOG00000027264	Dagla	diacylglycerol lipase, alpha [Source:RGD Symbol;Acc:1359461]
ENSRNOG00000032798	494.199	0.168768	0.0802721	2.10245	0.0355143	0.11581	ENSRNOG00000032798	Slco3a1	solute carrier organic anion transporter family, member 3a1 [Source:RGD Symbol;Acc:620227]
ENSRNOG00000019319	925.541	-0.000659104	0.0585488	-0.0112573	0.991018	0.997014	ENSRNOG00000019319	Fchsd2	FCH and double SH3 domains 2 [Source:RGD Symbol;Acc:1304812]
ENSRNOG00000018603	320.681	0.606746	0.105697	5.74043	9.44352e-09	3.96987e-07	ENSRNOG00000018603	Carns1	carnosine synthase 1 [Source:RGD Symbol;Acc:1308234]
ENSRNOG00000027422	343.105	0.0484368	0.0864119	0.560534	0.575115	0.74961	ENSRNOG00000027422	Fastkd3	FAST kinase domains 3 [Source:RGD Symbol;Acc:1309729]
ENSRNOG00000020763	3611.31	0.578131	0.0719846	8.03131	9.64387e-16	1.81713e-13	ENSRNOG00000020763	Snrnp70	small nuclear ribonucleoprotein U1 subunit 70 [Source:RGD Symbol;Acc:1307120]
ENSRNOG00000049505	131.976	-0.0842084	0.135799	-0.620098	0.535193	0.717115	ENSRNOG00000049505	Nup43	nucleoporin 43 [Source:RGD Symbol;Acc:1596513]
ENSRNOG00000059408	894.963	0.0206649	0.0765566	0.269929	0.787215	0.890113	ENSRNOG00000059408	Prr12	proline rich 12 [Source:RGD Symbol;Acc:1309896]
ENSRNOG00000048250	69.1315	0.24567	0.202463	1.21341	0.224974	0.421727	ENSRNOG00000048250	Ldaf1	lipid droplet assembly factor 1 [Source:RGD Symbol;Acc:727895]
ENSRNOG00000028891	79.888	-0.0431459	0.189856	-0.227256	0.820225	0.908616	ENSRNOG00000028891	Cyp2t1	cytochrome P450, family 2, subfamily t, polypeptide 1 [Source:RGD Symbol;Acc:620086]
ENSRNOG00000019959	3237.67	0.0498825	0.0730245	0.683092	0.494549	0.685259	ENSRNOG00000019959	Kcnc3	potassium voltage-gated channel subfamily C member 3 [Source:RGD Symbol;Acc:621358]
ENSRNOG00000020452	716.467	-0.125531	0.0646564	-1.94151	0.0521969	0.153904	ENSRNOG00000020452	Nsmce4a	NSE4 homolog A, SMC5-SMC6 complex component [Source:RGD Symbol;Acc:1309025]
ENSRNOG00000050224	653.019	-0.0084091	0.0796743	-0.105543	0.915945	0.959049	ENSRNOG00000050224	Stambpl1	STAM binding protein-like 1 [Source:RGD Symbol;Acc:1583011]
ENSRNOG00000014916	715.456	0.288436	0.0634014	4.54936	5.38083e-06	9.82386e-05	ENSRNOG00000014916	Lats1	large tumor suppressor kinase 1 [Source:RGD Symbol;Acc:1564085]
ENSRNOG00000020263	26440.7	-0.0677944	0.0582808	-1.16324	0.244734	0.446592	ENSRNOG00000020263	Atp1a3	ATPase Na+/K+ transporting subunit alpha 3 [Source:RGD Symbol;Acc:2169]
ENSRNOG00000051197	244.698	0.203064	0.113988	1.78145	0.0748384	0.198574	ENSRNOG00000051197	LOC120097345	60S ribosomal protein L7a [Source:RGD Symbol;Acc:41344265]
ENSRNOG00000020947	1836.41	-0.0432266	0.0603301	-0.716502	0.473681	0.668237	ENSRNOG00000020947	Egln2	egl-9 family hypoxia-inducible factor 2 [Source:RGD Symbol;Acc:631376]
ENSRNOG00000020597	146.442	-0.0835794	0.121701	-0.686758	0.492235	0.684037	ENSRNOG00000020597	C1h10orf88	similar to human chromosome 10 open reading frame 88 [Source:RGD Symbol;Acc:1305014]
ENSRNOG00000017826	506.161	-0.260598	0.0771363	-3.37841	0.000729063	0.00578878	ENSRNOG00000017826	Mtrr	5-methyltetrahydrofolate-homocysteine methyltransferase reductase [Source:RGD Symbol;Acc:1308671]
ENSRNOG00000013506	1016.25	0.344555	0.051699	6.66463	2.65328e-11	2.06791e-09	ENSRNOG00000013506	Zfand6	zinc finger AN1-type containing 6 [Source:RGD Symbol;Acc:1359317]
ENSRNOG00000014277	387.411	-0.0559373	0.0842387	-0.664034	0.506669	0.695027	ENSRNOG00000014277	Zdhhc13	zinc finger DHHC-type palmitoyltransferase 13 [Source:RGD Symbol;Acc:1309736]
ENSRNOG00000012641	1284.07	-0.0236687	0.0632057	-0.374471	0.708054	0.842204	ENSRNOG00000012641	Sfr1	SWI5-dependent homologous recombination repair protein 1 [Source:RGD Symbol;Acc:1305481]
ENSRNOG00000015675	1407.66	-0.14402	0.0797585	-1.80571	0.0709642	0.191089	ENSRNOG00000015675	Nell1	neural EGFL like 1 [Source:RGD Symbol;Acc:620998]
ENSRNOG00000050206	6051.69	-0.116169	0.0423273	-2.74454	0.0060596	0.0311609	ENSRNOG00000050206	Shank2	SH3 and multiple ankyrin repeat domains 2 [Source:RGD Symbol;Acc:628772]
ENSRNOG00000012002	550.067	0.202241	0.0875793	2.30923	0.020931	0.0779247	ENSRNOG00000012002	Iqgap1	IQ motif containing GTPase activating protein 1 [Source:RGD Symbol;Acc:1311884]
ENSRNOG00000012788	1311.03	-0.0607262	0.0536275	-1.13237	0.257478	0.461111	ENSRNOG00000012788	Clns1a	chloride nucleotide-sensitive channel 1A [Source:RGD Symbol;Acc:61884]
ENSRNOG00000019418	3081.4	0.0141143	0.0736149	0.191732	0.847953	0.92348	ENSRNOG00000019418	Lrrc4b	leucine rich repeat containing 4B [Source:RGD Symbol;Acc:1307121]
ENSRNOG00000042308	25.9532	0.0516078	0.288365	0.178967	0.857964	0.92903	ENSRNOG00000042308	Zfp455l1	zinc finger protein 455 like 1 [Source:RGD Symbol;Acc:1594231]
ENSRNOG00000012574	659.045	-0.0563084	0.0726147	-0.775441	0.438079	0.637993	ENSRNOG00000012574	Pum3	pumilio RNA-binding family member 3 [Source:RGD Symbol;Acc:1564753]
ENSRNOG00000047040	23.1185	-0.389944	0.322378	-1.20959	0.226437	0.423383	ENSRNOG00000047040	Lhb	luteinizing hormone subunit beta [Source:RGD Symbol;Acc:3006]
ENSRNOG00000001500	1098.41	0.0825986	0.0576061	1.43385	0.151614	0.322798	ENSRNOG00000001500	Rab4b	RAB4B, member RAS oncogene family [Source:RGD Symbol;Acc:620931]
ENSRNOG00000016737	865.634	-0.112979	0.0854131	-1.32273	0.185925	0.370916	ENSRNOG00000016737	Tcerg1l	transcription elongation regulator 1-like [Source:RGD Symbol;Acc:1562437]
ENSRNOG00000019413	130.19	0.187004	0.13945	1.34101	0.179917	0.362921	ENSRNOG00000019413	Atg16l2	autophagy related 16-like 2 [Source:RGD Symbol;Acc:1311400]
ENSRNOG00000068445	2715.46	-0.267604	0.0602643	-4.4405	8.97506e-06	0.00015027	ENSRNOG00000068445	Rplp2	ribosomal protein lateral stalk subunit P2 [Source:RGD Symbol;Acc:621775]
ENSRNOG00000015844	606.839	-0.15897	0.0693195	-2.29329	0.0218314	0.0804757	ENSRNOG00000015844	Snrpd2	small nuclear ribonucleoprotein D2 polypeptide [Source:RGD Symbol;Acc:1593018]
ENSRNOG00000068953	465.792	-0.150642	0.0879849	-1.71213	0.0868726	0.220407	ENSRNOG00000068953
ENSRNOG00000017963	462.05	0.281223	0.0739745	3.80163	0.000143748	0.00154322	ENSRNOG00000017963	RGD1566325	similar to regulator of sex-limitation candidate 16 [Source:RGD Symbol;Acc:1566325]
ENSRNOG00000019532	1675.86	0.0329566	0.0579392	0.568813	0.569483	0.745098	ENSRNOG00000019532	Emc10	ER membrane protein complex subunit 10 [Source:RGD Symbol;Acc:1303214]
ENSRNOG00000015217	469.816	-0.229887	0.0856511	-2.68399	0.00727498	0.0357474	ENSRNOG00000015217	Ltv1	LTV1 ribosome biogenesis factor [Source:RGD Symbol;Acc:1311264]
ENSRNOG00000016267	763.042	-0.0644115	0.0708784	-0.908761	0.363476	0.571033	ENSRNOG00000016267	Chst15	carbohydrate sulfotransferase 15 [Source:RGD Symbol;Acc:628881]
ENSRNOG00000020425	2163.61	-0.108284	0.0436248	-2.48217	0.0130585	0.0555167	ENSRNOG00000020425	Stim1	stromal interaction molecule 1 [Source:RGD Symbol;Acc:1306831]
ENSRNOG00000017383	464.016	-0.0502514	0.090384	-0.555977	0.578226	0.75192	ENSRNOG00000017383	Hikeshi	heat shock protein nuclear import factor hikeshi [Source:RGD Symbol;Acc:1359455]
ENSRNOG00000019161	964.04	0.253573	0.059152	4.2868	1.81262e-05	0.00026587	ENSRNOG00000019161	Cpeb1	cytoplasmic polyadenylation element binding protein 1 [Source:RGD Symbol;Acc:1310421]
ENSRNOG00000047526	410.562	-0.021968	0.0784463	-0.280039	0.779448	0.885624	ENSRNOG00000047526	Zfp526	zinc finger protein 526 [Source:RGD Symbol;Acc:1588959]
ENSRNOG00000028041	40.2718	-0.339628	0.27654	-1.22813	0.219396	0.414546	ENSRNOG00000028041	Tnnt1	troponin T1, slow skeletal type [Source:RGD Symbol;Acc:621852]
ENSRNOG00000016462	254.604	-0.0237853	0.0966504	-0.246096	0.805608	0.902391	ENSRNOG00000016462	LOC102547287	zinc finger protein 728-like [Source:RGD Symbol;Acc:7718701]
ENSRNOG00000010664	473.397	-0.181969	0.0744754	-2.44334	0.0145519	0.059981	ENSRNOG00000010664	Wdr73	WD repeat domain 73 [Source:RGD Symbol;Acc:1306429]
ENSRNOG00000019424	72.3309	0.178576	0.181687	0.98288	0.325667	0.533592	ENSRNOG00000019424	Aspdh	aspartate dehydrogenase domain containing [Source:RGD Symbol;Acc:1310111]
ENSRNOG00000016790	988.308	0.190186	0.0556103	3.41998	0.000626268	0.00512487	ENSRNOG00000016790	Kmt5b	lysine methyltransferase 5B [Source:RGD Symbol;Acc:1311637]
ENSRNOG00000039730	715.899	-0.142403	0.0668024	-2.1317	0.0330313	0.109932	ENSRNOG00000039730	Orai3	ORAI calcium release-activated calcium modulator 3 [Source:RGD Symbol;Acc:1306538]
ENSRNOG00000020949	34.8389	0.285508	0.269715	1.05856	0.289802	0.495373	ENSRNOG00000020949	Hsd17b14	hydroxysteroid (17-beta) dehydrogenase 14 [Source:RGD Symbol;Acc:1588673]
ENSRNOG00000013358	362.503	0.104576	0.0866657	1.20666	0.227563	0.424812	ENSRNOG00000013358	Aqp11	aquaporin 11 [Source:RGD Symbol;Acc:628763]
ENSRNOG00000049259	260.38	0.181417	0.109543	1.65612	0.0976976	0.23959	ENSRNOG00000049259	LOC102549842	zinc finger protein 91-like [Source:RGD Symbol;Acc:7600894]
ENSRNOG00000015860	79.5994	1.0817	0.197357	5.48092	4.23124e-08	1.48417e-06	ENSRNOG00000015860	Gipr	gastric inhibitory polypeptide receptor [Source:RGD Symbol;Acc:2689]
ENSRNOG00000018517	140.441	0.251647	0.1352	1.86129	0.0627038	0.175101	ENSRNOG00000018517	Trim21	tripartite motif-containing 21 [Source:RGD Symbol;Acc:1305795]
ENSRNOG00000050554	37.144	-0.108286	0.262255	-0.412905	0.679676	0.822766	ENSRNOG00000050554	C1h10orf143	similar to human chromosome 10 open reading frame 143 [Source:RGD Symbol;Acc:2318344]
ENSRNOG00000021206	1093.14	-0.0716586	0.07895	-0.907645	0.364066	0.571592	ENSRNOG00000021206	Plaat3	phospholipase A and acyltransferase 3 [Source:RGD Symbol;Acc:2829]
ENSRNOG00000050223	1804.31	-0.141782	0.0600241	-2.36208	0.0181729	0.07049	ENSRNOG00000050223	Rin1	Ras and Rab interactor 1 [Source:RGD Symbol;Acc:620006]
ENSRNOG00000069921	307.195	0.188333	0.0934799	2.01468	0.0439377	0.135662	ENSRNOG00000069921	Zfp748	zinc finger protein 748 [Source:RGD Symbol;Acc:1594173]
ENSRNOG00000016054	1296.46	-0.0496835	0.0540221	-0.91969	0.357735	0.564851	ENSRNOG00000016054	Tab2	TGF-beta activated kinase 1/MAP3K7 binding protein 2 [Source:RGD Symbol;Acc:1309527]
ENSRNOG00000020956	193.212	0.149088	0.138259	1.07832	0.280889	0.486991	ENSRNOG00000020956	Bcat2	branched chain amino acid transaminase 2 [Source:RGD Symbol;Acc:68948]
ENSRNOG00000001501	262.848	0.0697415	0.101399	0.687794	0.491583	0.683583	ENSRNOG00000001501	Snrpa	small nuclear ribonucleoprotein polypeptide A [Source:RGD Symbol;Acc:1307416]
ENSRNOG00000020417	3533.86	-0.114062	0.0385438	-2.95927	0.00308366	0.0184982	ENSRNOG00000020417	Gsk3a	glycogen synthase kinase 3 alpha [Source:RGD Symbol;Acc:620351]
ENSRNOG00000013877	110.069	-0.312993	0.175253	-1.78595	0.0741074	0.197061	ENSRNOG00000013877	Ttc23	tetratricopeptide repeat domain 23 [Source:RGD Symbol;Acc:1310409]
ENSRNOG00000064721	962.401	0.03089	0.0782394	0.394815	0.69298	0.832425	ENSRNOG00000064721	Rgmb	repulsive guidance molecule BMP co-receptor b [Source:RGD Symbol;Acc:1595392]
ENSRNOG00000018878	632.025	0.631912	0.0830333	7.61035	2.73364e-14	3.90061e-12	ENSRNOG00000018878	Ssh3	slingshot protein phosphatase 3 [Source:RGD Symbol;Acc:1308679]
ENSRNOG00000020410	38.73	-0.228064	0.242264	-0.941384	0.346508	0.55427	ENSRNOG00000020410	Th	tyrosine hydroxylase [Source:RGD Symbol;Acc:3853]
ENSRNOG00000014852	282.68	0.304853	0.0967837	3.14984	0.00163362	0.0110693	ENSRNOG00000014852	Fbxo30	F-box protein 30 [Source:RGD Symbol;Acc:1359367]
ENSRNOG00000037715	441.324	0.0387295	0.0780054	0.496498	0.619543	0.783195	ENSRNOG00000037715	Actmap	actin maturation protease [Source:RGD Symbol;Acc:1560854]
ENSRNOG00000020793	536.197	-0.0331416	0.0769415	-0.430738	0.666659	0.814524	ENSRNOG00000020793	Ruvbl2	RuvB-like AAA ATPase 2 [Source:RGD Symbol;Acc:1306509]
ENSRNOG00000047145	272.94	0.179762	0.0974383	1.84488	0.0650546	0.179939	ENSRNOG00000047145	LOC102551340	zinc finger protein 728-like [Source:RGD Symbol;Acc:7697243]
ENSRNOG00000019442	365.669	0.227146	0.0963405	2.35774	0.0183863	0.0711302	ENSRNOG00000019442	Josd2	Josephin domain containing 2 [Source:RGD Symbol;Acc:1307305]
ENSRNOG00000016935	1057.55	0.169519	0.0630546	2.68845	0.00717838	0.0354386	ENSRNOG00000016935	Mapk1ip1	mitogen-activated protein kinase 1 interacting protein 1 [Source:RGD Symbol;Acc:1565431]
ENSRNOG00000018531	497.901	-0.0868236	0.0759818	-1.14269	0.253168	0.456317	ENSRNOG00000018531	Mrps11	mitochondrial ribosomal protein S11 [Source:RGD Symbol;Acc:1559901]
ENSRNOG00000020426	642.291	-0.0457932	0.0908396	-0.50411	0.614184	0.779585	ENSRNOG00000020426	Erf	Ets2 repressor factor [Source:RGD Symbol;Acc:1311991]
ENSRNOG00000016038	48.3217	0.0514204	0.215506	0.238604	0.811413	0.904667	ENSRNOG00000016038	Mgmt	O-6-methylguanine-DNA methyltransferase [Source:RGD Symbol;Acc:3087]
ENSRNOG00000016611	2589.84	-0.140807	0.0496137	-2.83807	0.00453874	0.0249741	ENSRNOG00000016611	Hras	HRas proto-oncogene, GTPase [Source:RGD Symbol;Acc:2827]
ENSRNOG00000056118	4305.63	-0.19525	0.0440944	-4.428	9.51111e-06	0.000157086	ENSRNOG00000056118	Cic	capicua transcriptional repressor [Source:RGD Symbol;Acc:1310706]
ENSRNOG00000019127	226.771	0.514742	0.111076	4.63415	3.58415e-06	6.94938e-05	ENSRNOG00000019127	Zfp606	zinc finger protein 606 [Source:RGD Symbol;Acc:1309810]
ENSRNOG00000046353	120.043	0.108593	0.150475	0.721669	0.470498	0.665331	ENSRNOG00000046353	Zfp273l-ps1	zinc finger protein 273 like, pseudogene 1 [Source:RGD Symbol;Acc:1587241]
ENSRNOG00000023150	13181.2	-0.12189	0.038124	-3.19719	0.00138772	0.00973522	ENSRNOG00000023150	Gpi	glucose-6-phosphate isomerase [Source:RGD Symbol;Acc:2727]
ENSRNOG00000047229	406.605	0.243387	0.0843922	2.884	0.00392657	0.0222728	ENSRNOG00000047229	Trim68	tripartite motif containing 68 [Source:RGD Symbol;Acc:1593867]
ENSRNOG00000062741	64.0782	0.138467	0.176972	0.782421	0.433967	0.634521	ENSRNOG00000062741	Ldhal6b	lactate dehydrogenase A-like 6B [Source:RGD Symbol;Acc:727955]
ENSRNOG00000020587	300.539	0.239267	0.0977778	2.44705	0.014403	0.0595948	ENSRNOG00000020587	Efemp2	EGF containing fibulin extracellular matrix protein 2 [Source:RGD Symbol;Acc:1359496]
ENSRNOG00000027240	2735.13	0.200413	0.0601016	3.33457	0.00085431	0.0065634	ENSRNOG00000027240	Kndc1	kinase non-catalytic C-lobe domain containing 1 [Source:RGD Symbol;Acc:1565261]
ENSRNOG00000020411	1286.67	-0.108717	0.051762	-2.10033	0.0357	0.116338	ENSRNOG00000020411	Sec23ip	SEC23 interacting protein [Source:RGD Symbol;Acc:1309328]
ENSRNOG00000063592	66.0687	0.122216	0.226816	0.538832	0.590003	0.761908	ENSRNOG00000063592	Lyve1	lymphatic vessel endothelial hyaluronan receptor 1 [Source:RGD Symbol;Acc:1310864]
[truncated: 14,216 more rows]

## Sheet: genotype_5m
ensembl_geneID	baseMean	log2FoldChange	lfcSE	stat	pvalue	padj	ensembl	rgd_symbol	description
[truncated: 14,697 more rows]

[truncated: 2 more sheets: genotype_12m, interaction]
